# Supplementary material for: Unveiling the reactivity of CO2 with carbanions: a theoretical analysis of the carboxylation step
Source: Royal Society of Chemistry journal article supplement (doi:10.1039/d4se01065e), 2024-01-01
Supplement: d4se01065e1.pdf [file d4se01065e1.pdf]

## Electronic Supporting Information

**Unveiling the reactivity of CO<sub>2</sub> with carbanions: a theoretical analysis of the carboxylation step**

**Catia Nicoletti,<sup>\*a</sup> Manuel Orlandi,<sup>a</sup> Luca Dell'Amico<sup>a</sup> and Andrea Sartorel<sup>\*a</sup>**

Department of Chemical Sciences, University of Padova, via Marzolo 1, 35131 Padova, Italy.

[catia.nicoletti@phd.unipd.it](mailto:catia.nicoletti@phd.unipd.it); [andrea.sartorel@unipd.it](mailto:andrea.sartorel@unipd.it)

## TABLE OF CONTENTS

|                                                                                                                      |     |
|----------------------------------------------------------------------------------------------------------------------|-----|
| A. GENERAL INFORMATION                                                                                               | S3  |
| B. CONFORMATIONAL ANALYSIS                                                                                           | S4  |
| C. DFT FUNCTIONALS AND BASIS SET COMBINATIONS                                                                        | S7  |
| D. $\Delta G^\ddagger$ AND EXPERIMENTAL $\text{PK}_{\text{AH}}$                                                      | S8  |
| E. GIBBS ENERGY TABLES AND CORRELATIONS WITH DIFFERENT LEVELS OF CALCULATIONS                                        | S9  |
| F. MARCUS FITTING                                                                                                    | S14 |
| G. ELECTROPHILICITY VALUES OF $\text{CO}_2$                                                                          | S15 |
| H. ENTHALPIC AND ENTROPIC CONTRIBUTIONS                                                                              | S16 |
| I. $\Delta E^\ddagger$ DISTORTION: DIFFERENCE BETWEEN CARBANION AND $\text{CO}_2$ DISTORTION AT THE TRANSITION STATE | S17 |
| L. $\Delta E^\ddagger$ DISTORTION: ENERGY TABLES                                                                     | S18 |
| M. O-C-O ANGLE DISTORTION AND C-C DISTANCE IN THE TRANSITION STATE                                                   | S19 |
| N. OPTIMIZED GEOMETRIES                                                                                              | S20 |
| N.1 B3LYP/6-311G(D,P)                                                                                                | S20 |
| N.2 WB97XD/DEF2TZVP                                                                                                  | S29 |
| O. INTRINSIC REACTION COORDINATE (IRC) ANALYSIS                                                                      | S40 |
| P. REFERENCES                                                                                                        | S55 |

## A. GENERAL INFORMATION

DFT calculations were performed on 28 small organic molecules, containing C-H moieties (neutral organic molecule is eventually indicated as  $R_i$ -H). For every molecule considered, geometry optimization and calculation of Gibbs free energy were performed on carbanion  $R_i^-$  (negative charge, singlet states), carboxylated carbanion  $R_i$ -COO $^-$  (negative charge, singlet states), transition state of the carboxylation step of the carbanion  $R_i$ -TS (negative charge, singlet state). When different  $R_i^-$  conformer-geometries can be optimised, the correspondence of  $R_i$ -COO $^-$  and  $R_i$ -TS structures was carefully evaluated.

All calculations were performed with Gaussian16 software at the C<sub>3</sub>P facility of the University of Padova; Gauss View 6 software was used as a graphical interface to build the input and interpret the output.

For all molecules, geometry optimisations and frequency calculations were done, using the density functional theory (DFT) method:

- b3lyp/6-311g(d,p)//b3lyp/6-311g(d,p): B3LYP functional and Pople 6-311g(d,p) basis set;
- $\omega$ b97xd/def2tzvp// $\omega$ b97xd/def2tzvp:  $\omega$ B97XD long-range-corrected functional, which includes empirical dispersion and with def2tzvp Ahlrichs' triple-zeta basis set.

Single point calculations (SPE) were evaluated with:

- $\omega$ b97xd/aug-cc-pvtz// $\omega$ b97xd/def2tzvp:  $\omega$ B97XD using aug-cc-pvtz basis set which is including diffuse functions) from optimised geometries at the  $\omega$ B97XD/def2tzvp level;
- b2plypd/aug-cc-pvtz// $\omega$ b97XD/def2tzvp: double hybrid b2plypd functional, with the aug-cc-pvtz basis set from optimised geometries at the  $\omega$ b97XD/def2tzvp level.

A correction of +1.90 kcalmol $^{-1}$  to the computed free energy and enthalpy values was applied to convert the standard state from 1 atm to a 1 M solution.<sup>1,2</sup>

The self-consistent reaction field (SCRF) was used with DFT energies, optimizations, and frequency calculations to model systems in acetonitrile solution, at. For all calculations a pruned (99,590) integration grid was used (keyword: Integral=UltraFine, the default choice in Gaussian16).

All the structures were optimised including a continuum solvation model for acetonitrile (or dimethylsulfoxide, DMSO) using the integral equation formalism variant (IEFPCM).

Stationary points on the potential energy surface were determined to be minima (no vibrational modes with imaginary frequency) and the actual nature of calculated transition states was confirmed by analysis of frequencies (only one mode with imaginary vibrational

frequency) and the reliability of the transition states was corroborated by intrinsic reaction coordinate (IRC) computation.

Entropy corrections through the Truhlar model were also evaluated,<sup>3</sup> using *GoodVibes* as Python program.<sup>4</sup> Low frequencies vibrations (lower than the selected cut-off value) in the rigid-rotor harmonic oscillator (RRHO) are uniformly shifted up to the cut-off value of 50.0 or 100.0 wavenumber.

The command expressed in all computed jobs in this work was:

- To obtain the optimized molecular structure and local minimum of energy: # opt freq b3lyp/6-311g(d,p) scrf=(solvent=acetonitrile) or # opt freq=noraman wb97xd scrf=(solvent=acetonitrile) def2tzvp
- To obtain the scan of the energy while breaking a C-COO bond: opt=modredundant b3lyp/6-311g(d,p) scrf=(solvent=acetonitrile) or # opt=modredundant wb97xd/def2tzvp scrf=(solvent=acetonitrile). Scans were done with an amplitude of 0.1 and 0.01 Å. # opt=modredundant pm3 scrf=(solvent=acetonitrile)
- To obtain the optimized molecular structure of a transition state and local maximum of energy: # opt=(calcfc,ts,noeigen) freq=noraman b3lyp/6-311g(d,p) scrf=(solvent=acetonitrile) or # opt=(calcfc,ts,noeigen) freq=noraman wb97xd/def2tzvp scrf=(solvent=acetonitrile)
- To obtain intrinsic reaction coordinate (IRC) profile: # irc=(calcfc,recorrect=never,maxpoints=20) wb97xd scrf=(solvent=acetonitrile) def2tzvp

## B. CONFORMATIONAL ANALYSIS

For anions  $R_{23}^-$ ,  $R_{24}^-$  and  $R_{25}^-$  and for the dianion of chalcone  $R_{27}^{2-}$ , an initial conformational analysis was performed at semiempirical pm3 level including a solvation model for acetonitrile. The conformational search considered the full rotation of two dihedral angles involving the groups in proximity of the anion site (16 steps of 24° for each dihedral angle, for a total of 256 points). The conformational analysis on  $R_{23}^-$ ,  $R_{24}^-$  and  $R_{25}^-$  provided 4 main conformers for  $R_{23}^-$ , three conformers for  $R_{24}^-$  and four conformers for  $R_{25}^-$ , see the images in Figures S1-S3. In the case of  $R_{27}^{2-}$ , the two most stable conformers are represented in Figure S4.

The command expressed to obtain the scan of the energy while rotating the dihedral angles is # opt=modredundant pm3 scrf=(solvent=acetonitrile).

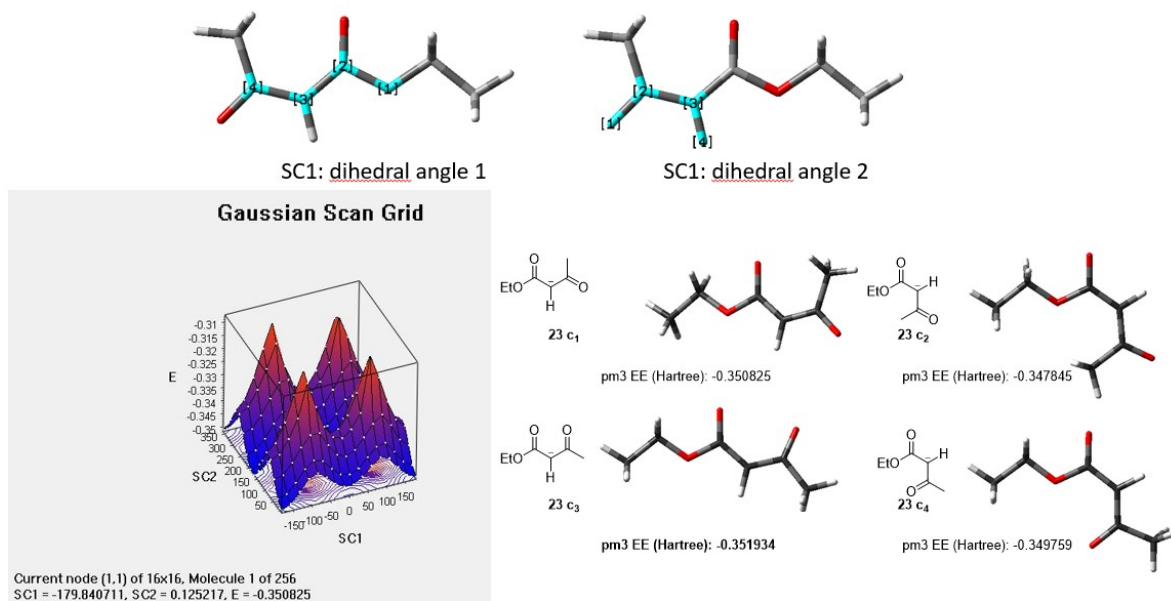

Figure S1. Conformational analysis for anion  $R_{23}^-$  with representation of the two dihedral angles scanned (pm3,  $\text{CH}_3\text{CN}$ , 16 steps of  $24^\circ$  for each angle, for a total of 256 conformers), energy map and representation of the most stable four conformers.

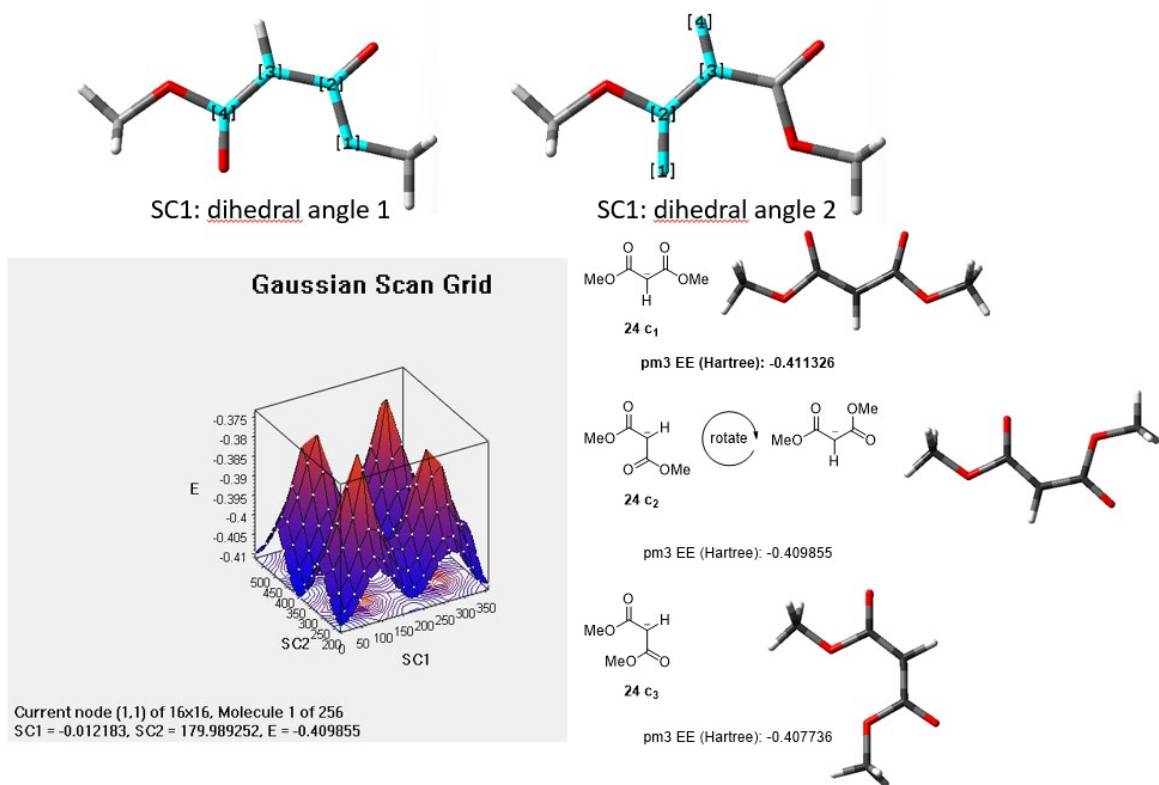

Figure S2. Conformational analysis for anion  $R_{24}^-$  with representation of the two dihedral angles scanned (pm3,  $\text{CH}_3\text{CN}$ , 16 steps of  $24^\circ$  for each angle, for a total of 256 conformers), energy map and representation of the most stable three conformers.

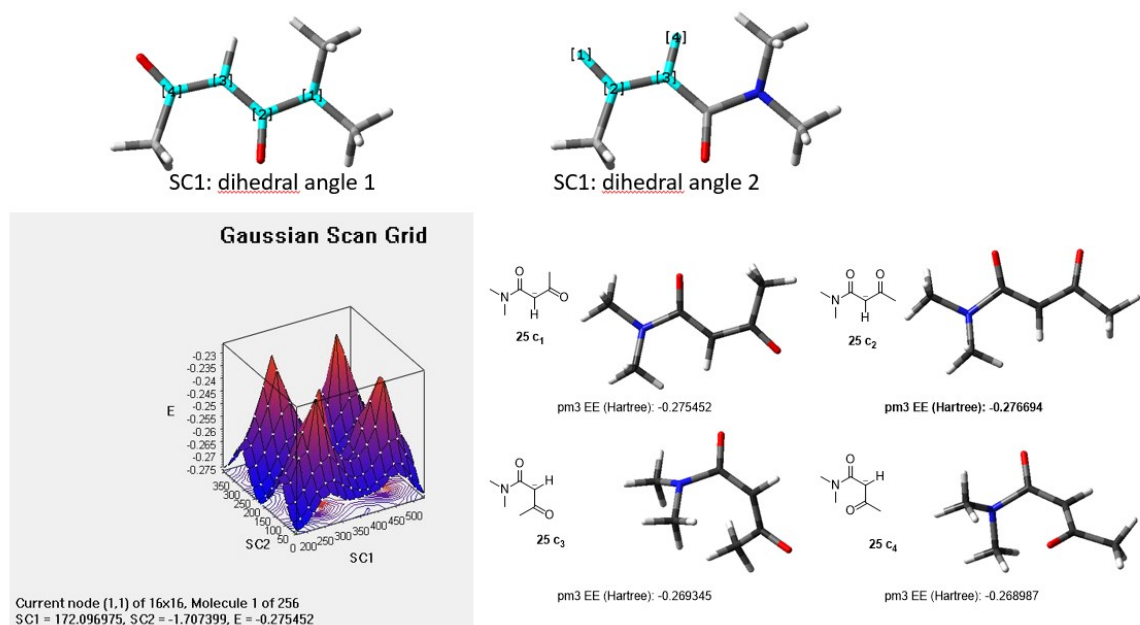

Figure S3. Conformational analysis for anion  $R_{25}^-$  with representation of the two dihedral angles scanned (pm3,  $\text{CH}_3\text{CN}$ , 16 steps of  $24^\circ$  for each angle, for a total of 256 conformers), energy map and representation of the most stable four conformers.

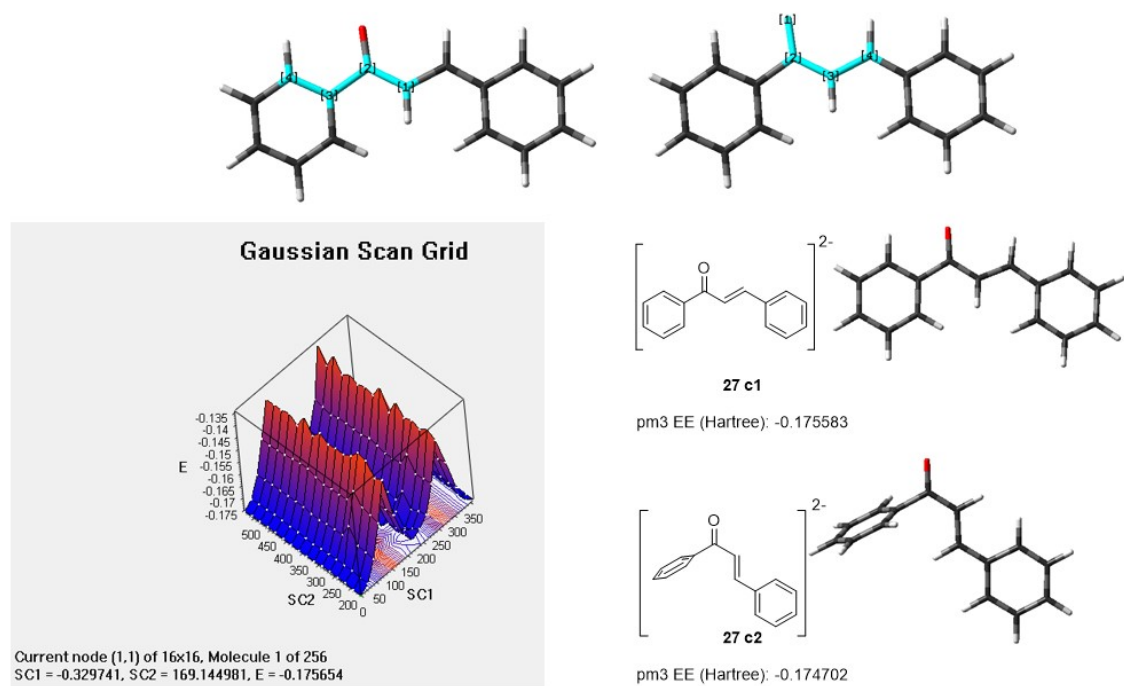

Figure S4. Conformational analysis for anion  $R_{27}^{2-}$  with representation of the two dihedral angles scanned (pm3,  $\text{CH}_3\text{CN}$ , 16 steps of  $24^\circ$  for each angle, for a total of 256 conformers), energy map and representation of the most stable two conformers.

For  $R_{23}^-$ ,  $R_{24}^-$  and  $R_{25}^-$ , DFT optimisations of the anions at  $\omega$ b97xd/aug-cc-pvtz// $\omega$ b97xd/def2tzvp level were performed on the different conformers to evaluate their relative stability. Then, for the two most stable conformers of each carbanion, calculations were executed also on the corresponding carboxylated species and transition state, to evaluate the impact of the conformational difference on the thermodynamic and activation free energy barrier of the carboxylation step. The results are represented in Table S1, showing that the initial conformation of the carbanions has a minor impact on the calculated  $\Delta G^0$  and  $\Delta G^\ddagger$ .

Table S1. Calculated relative free energies between conformers of  $R_{23}^-$ ,  $R_{24}^-$  and  $R_{25}^-$  and respective  $\Delta G^0$  and  $\Delta G^\ddagger$  for the carboxylation step for the most stable ones ( $\omega$ b97XD/aug-cc-pvtz// $\omega$ b97XD/def2tzvp). Attention was paid in maintaining the conformational motif when optimising the product and the transition state of the corresponding conformer. See the images of the corresponding conformers in Figure S1, S2 and S3. See geometries and x,y,z coordinates in **Section N.2**.

| Carbanion conformers                                  | Relative free energy     | Carboxylation step                    |                                              |
|-------------------------------------------------------|--------------------------|---------------------------------------|----------------------------------------------|
|                                                       | (kcalmol <sup>-1</sup> ) | $\Delta G^0$ (kcalmol <sup>-1</sup> ) | $\Delta G^\ddagger$ (kcalmol <sup>-1</sup> ) |
| $R_{23}^-$ c <sub>1</sub> (reported in the main text) | <b>0.00</b>              | 4.54                                  | 13.87                                        |
| $R_{23}^-$ c <sub>2</sub>                             | 1.41                     |                                       |                                              |
| $R_{23}^-$ c <sub>3</sub>                             | <b>0.60</b>              | 3.80                                  | 14.13                                        |
| $R_{23}^-$ c <sub>4</sub>                             | 1.37                     |                                       |                                              |
| $R_{24}^-$ c <sub>1</sub> (reported in the main text) | <b>0.00</b>              | 4.25                                  | 13.69                                        |
| $R_{24}^-$ c <sub>2</sub>                             | <b>1.23</b>              | 2.11                                  | 13.53                                        |
| $R_{24}^-$ c <sub>3</sub>                             | 2.12                     |                                       |                                              |
| $R_{25}^-$ c <sub>1</sub> (reported in the main text) | <b>0.00</b>              | -2.29                                 | 12.59                                        |
| $R_{25}^-$ c <sub>2</sub>                             | <b>0.17</b>              | -1.55                                 | 11.94                                        |
| $R_{25}^-$ c <sub>3</sub>                             | 3.32                     |                                       |                                              |
| $R_{25}^-$ c <sub>4</sub>                             | 1.77                     |                                       |                                              |

## C. FUNCTIONALS AND BASIS SET COMBINATIONS

To select the best performing level of theory that we employ in the main text analysis, comparison of different functionals and basis set was done taking advantage of the availability of an experimental  $\Delta G^\ddagger$  value of 10.0 kcal·mol<sup>-1</sup> for the carboxylation of the indenide anion  $R_2^-$  from a bimolecular rate constant of  $2.09 \pm 0.07 \cdot 10^5 \text{ M}^{-1}\text{s}^{-1}$  (in dimethylsulfoxide at 20°C),<sup>1</sup>. Computed energies for this selected carboxylation reaction are

shown in the Table S2.  $\omega$ b97XD/aug-cc-pvtz// $\omega$ b97XD/def2tzvp level (calculated  $\Delta G^\ddagger = 11.9$  kcalmol<sup>-1</sup> for carboxylation of  $R_2^-$ ) was chosen as the level of theory among the ones tested.

Table S2.  $\Delta G^\ddagger$  for indenide anion  $R_2^-$  obtained with different levels of theory, solvent IEFPCM (DMSO).

| level of theory                                                                                                      | $\Delta G^\ddagger$ (kcal/mol) |
|----------------------------------------------------------------------------------------------------------------------|--------------------------------|
| b3lyp/g-311g(d,p)//b3lyp/g-311g(d,p)                                                                                 | 12.8                           |
| $\omega$ b97xd/def2tzvp// $\omega$ b97xd/def2tzvp                                                                    | 12.6                           |
| <b><math>\omega</math>b97xd/aug-cc-pvtz//<math>\omega</math>b97xd/def2tzvp</b>                                       | <b>11.9</b>                    |
| b2plypd/aug-cc-pvtz// $\omega$ b97xd/def2tzvp                                                                        | 15.2                           |
| $\omega$ b97xd/def2tzvp// $\omega$ b97xd/def2tzvp with Truhlar entropy correction (cut-off of 100 cm <sup>-1</sup> ) | 13.7                           |
| $\omega$ b97xd/def2tzvp// $\omega$ b97xd/def2tzvp with Truhlar entropy correction (cut-off of 50 cm <sup>-1</sup> )  | 13.1                           |
| IEFPCM(DMSO)/B3LYP-D3/6-311+G(d,p) <sup>1</sup>                                                                      | 7.9                            |
| Experimental (dmsO, 20°C) <sup>1</sup>                                                                               | 10.0                           |

#### D. $\Delta G^\ddagger$ AND EXPERIMENTAL $pK_{AH}$

Table S3. Computed  $\Delta G^\ddagger$  ( $\omega$ b97xd/aug-cc-pvtz// $\omega$ b97xd/def2tzvp, IEFPCM(CH<sub>3</sub>CN)) and experimental  $pK_{AH}$  of carbanions  $R_i^-$ .

| i  | species                                     | $pK_{AH}$ (DMSO; H <sub>2</sub> O) | $\Delta G$ (kcal/mol) |
|----|---------------------------------------------|------------------------------------|-----------------------|
| 1  | cyclopentadiene_anion                       | 18.00                              | 14.27                 |
| 2  | indene_anion                                | 20.10                              | 12.19                 |
| 3  | malonitrile_anion                           | 11.10                              | 14.02                 |
| 4  | acetylene_anion                             | 24.00                              | 7.52                  |
| 5  | phenylacetylene_anion                       | 28.80                              | 8.21                  |
| 6  | diphenylmethane_anion                       | 32.20                              | 6.61                  |
| 7  | pCNtoluene_anion                            | 30.80                              | 8.53                  |
| 8  | pCOPhtoluene_anion                          | 26.90                              | 9.09                  |
| 9  | pNO2toluene_anion                           | 20.40                              | 13.02                 |
| 10 | acetone_anion                               | 26.50                              | 8.90                  |
| 11 | dimethylpentanone_anion                     | 28.30                              | 8.04                  |
| 12 | cyclobutanone_anion                         | 25.10                              | 7.88                  |
| 13 | cyclohexanone_anion                         | 26.40                              | 8.79                  |
| 14 | acetophenone_anion                          | 24.70                              | 8.26                  |
| 15 | pCNacetophenone_anion                       | 22.00                              | 10.15                 |
| 16 | pNMe2acetophenone_anion                     | 27.50                              | 8.84                  |
| 17 | Benzoylacetone_nitrile_anion                | 10.20                              | 15.92                 |
| 18 | Phbenzylketone_anion                        | 14.20                              | 12.49                 |
| 19 | 2-Facetophenone_anion                       | 21.60                              | 8.59                  |
| 20 | phepropanone_anion                          | 24.40                              | 9.53                  |
| 21 | acetic acid tert-butyl ester_anion          | 30.30                              | 6.40                  |
| 22 | <sup>t</sup> BuPhenylacetate_anion          | 23.60                              | 9.08                  |
| 23 | Etacetoacetate_anion                        | 14.20                              | 13.87                 |
| 24 | diMealonate_anion                           | 15.70                              | 13.69                 |
| 25 | diMeacetoacetamid_anion                     | 18.20                              | 12.59                 |
| 26 | 3-oxo-3-pyrrolidin-1-yl-propionitrile_anion | 17.20                              | 11.50                 |



## E. GIBBS ENERGY TABLES AND CORRELATIONS WITH DIFFERENT LEVELS OF CALCULATIONS

The plot of  $\Delta G^\ddagger$  vs  $\Delta G^0$  values show a fair linear trend according to eq. 2 in the manuscript also with different combinations of functionals and basis sets. The Figure S1 highlight the linear trends of the collected energy data (reported in Table S3-6).

The data plot of  $\Delta G^\ddagger$  vs  $\Delta G^0$  for  $\omega$ b97xd/aug-cc-pvtz// $\omega$ b97xd/def2tzvp (Figure 1 in the manuscript and Figure S5, black dots) values show a fair linear trend with a slope of  $\alpha = 0.26 \pm 0.02$  and an intercept of  $\Delta G_0^\ddagger = 12.7 \pm 0.3$  kcalmol<sup>-1</sup>

Similar slopes ( $\alpha$ ) of  $0.28 \pm 0.02$  are obtained with  $\omega$ b97xd/def2tzvp// $\omega$ b97xd/def2tzvp (red dots) and b2plypd/aug-cc-pvtz// $\omega$ b97xd/def2tzvp (blue dots) although there is a major change in the intercept value ( $\Delta G_0^\ddagger$ ) of  $15.2 \pm 0.3$  kcalmol<sup>-1</sup> in the case of the double hybrid functional (/aug-cc-pvtz// $\omega$ b97xd/def2tzvp). Comparable behaviour is obtained at b3lyp/g-311g(d,p)//b3lyp/g-311g(d,p) (green dots) level of theory confirming that not so dissimilar results can be obtained using less demanding computational cost.

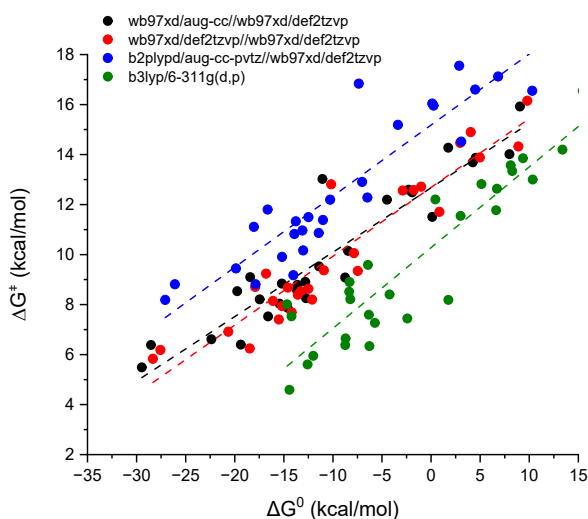

|                         |                        |                         |                        |                         |                        |
|-------------------------|------------------------|-------------------------|------------------------|-------------------------|------------------------|
| Equation                | $y = a + b \cdot x$    | Equation                | $y = a + b \cdot x$    | Equation                | $y = a + b \cdot x$    |
| Plot                    | DeltaG#                | Plot                    | DeltaG#                | Plot                    | DeltaG#                |
| Weight                  | No Weighting           | Weight                  | No Weighting           | Weight                  | No Weighting           |
| Intercept               | $12.68526 \pm 0.26781$ | Intercept               | $10.27737 \pm 0.24653$ | Intercept               | $15.18141 \pm 0.30755$ |
| Slope                   | $0.2753 \pm 0.01943$   | Slope                   | $0.32285 \pm 0.02698$  | Slope                   | $0.28446 \pm 0.02331$  |
| Residual Sum of Squares | 27.16677               | Residual Sum of Squares | 42.34387               | Residual Sum of Squares | 40.07003               |
| Pearson's r             | 0.94093                | Pearson's r             | 0.91998                | Pearson's r             | 0.92268                |
| R-Square (COD)          | 0.88534                | R-Square (COD)          | 0.84636                | R-Square (COD)          | 0.85134                |
| Adj. R-Square           | 0.88093                | Adj. R-Square           | 0.84045                | Adj. R-Square           | 0.84562                |

Figure S5. Calculated  $\Delta G^\ddagger$  vs  $\Delta G^0$  data for  $\omega$ b97xd/def2tzvp// $\omega$ b97xd/def2tzvp (red dots),  $\omega$ b97xd/aug-cc-pvtz// $\omega$ b97xd/def2tzvp (black dots), b2plypd/aug-cc-pvtz// $\omega$ b97xd/def2tzvp (blue dots) and b3lyp/g-311g(d,p)//b3lyp/g-311g(d,p) (green dots), all with IEFPCM(CH<sub>3</sub>CN). Linear fitting equations can be derived considering the values of slope as  $\alpha$  parameter and the value of intercept as  $\Delta G_0^\ddagger$  (following eq. 2 in the manuscript) for each levels of calculation.



Table S5. Gibbs Energies, Enthalpic and Entropic contributions at ωb97XD/def2tzvp//ωb97XD/def2tzvp level, IEFPCM(CH<sub>3</sub>CN).

| i  | species                                         | charge | mult. | Gibbs (hartree) | CORRECTED + 1.90 (kcal/mol) |                    | CORRECTED + 1.90 (kcal/mol) |         | ΔG°    | ΔG*     | ΔH°    | ΔH*     | TΔS°    | TΔS* |
|----|-------------------------------------------------|--------|-------|-----------------|-----------------------------|--------------------|-----------------------------|---------|--------|---------|--------|---------|---------|------|
|    |                                                 |        |       |                 | Gibbs (kcal/mol)            | Enthalpy (hartree) | Enthalpy (kcal/mol)         |         |        |         |        |         |         |      |
|    | CO <sub>2</sub>                                 | 0      | 1     | -188.617485     | -118357.38                  | -188.592598        | -118341.77                  |         |        |         |        |         |         |      |
| 1  | cyclopentadiene_anion                           | -1     | 1     | -193.560277     | -121459.03                  | -193.529044        | -121439.43                  | 2.969   | 14.466 | -7.438  | 4.030  | -10.407 | -10.436 |      |
|    | cyclopentadiene_COO                             | -1     | 1     | -382.170002     | -239813.45                  | -382.130467        | -239788.64                  |         |        |         |        |         |         |      |
|    | cyclopentadiene_COO_TS                          | -1     | 1     | -382.151681     | -239801.95                  | -382.112192        | -239777.17                  |         |        |         |        |         |         |      |
| 2  | indene_anion                                    | -1     | 1     | -347.166230     | -217848.24                  | -347.128857        | -217824.79                  | -2.891  | 12.561 | -13.543 | 2.380  | -10.652 | -10.181 |      |
|    | indene_COO                                      | -1     | 1     | -535.785294     | -336208.52                  | -535.740009        | -336180.10                  |         |        |         |        |         |         |      |
|    | indene_COO_TS                                   | -1     | 1     | -535.760670     | -336193.06                  | -535.714634        | -336164.18                  |         |        |         |        |         |         |      |
| 3  | malonitrile_anion                               | -1     | 1     | -224.514966     | -140883.40                  | -224.481943        | -140862.67                  | 8.896   | 14.323 | -1.817  | 4.263  | -10.713 | -10.060 |      |
|    | malonitrile_COO                                 | -1     | 1     | -413.115246     | -259231.88                  | -413.074409        | -259206.26                  |         |        |         |        |         |         |      |
|    | malonitrile_COO_TS                              | -1     | 1     | -413.106598     | -259226.46                  | -413.064719        | -259200.18                  |         |        |         |        |         |         |      |
| 4  | acetylene_anion                                 | -1     | 1     | -76.825328      | -48206.73                   | -76.802405         | -48192.35                   | 15.508  | 7.403  | -25.240 | -0.449 | -9.733  | -7.851  |      |
|    | acetylene_COO                                   | -1     | 1     | -265.464498     | -166579.62                  | -265.432198        | -166559.35                  |         |        |         |        |         |         |      |
|    | acetylene_COO_TS                                | -1     | 1     | -265.427988     | -166556.71                  | -265.392690        | -166534.56                  |         |        |         |        |         |         |      |
| 5  | phenylacetylene_anion                           | -1     | 1     | -307.813196     | -193153.84                  | -307.775762        | -193130.35                  | -16.100 | 8.147  | -25.810 | -0.282 | -9.710  | -8.429  |      |
|    | phenylacetylene_COO                             | -1     | 1     | -496.453310     | -311527.32                  | -496.406463        | -311497.92                  |         |        |         |        |         |         |      |
|    | phenylacetylene_COO_TS                          | -1     | 1     | -496.414670     | -311503.07                  | -496.365782        | -311472.39                  |         |        |         |        |         |         |      |
| 6  | diphenylmethane_anion                           | -1     | 1     | -501.928287     | -314962.92                  | -501.880882        | -314933.17                  | -20.654 | 6.911  | -30.791 | -2.433 | -10.136 | -9.345  |      |
|    | diphenylmethane_COO                             | -1     | 1     | -690.576569     | -433340.96                  | -690.519520        | -433305.73                  |         |        |         |        |         |         |      |
|    | diphenylmethane_COO_TS                          | -1     | 1     | -690.531730     | -433313.39                  | -690.474330        | -433277.37                  |         |        |         |        |         |         |      |
| 7  | pCtoluene_anion                                 | -1     | 1     | -363.208897     | -227915.17                  | -363.168689        | -227889.94                  | -17.915 | 8.707  | -28.330 | -0.917 | -10.415 | -9.624  |      |
|    | pCtoluene_COO                                   | -1     | 1     | -551.851904     | -346290.47                  | -551.803406        | -346260.03                  |         |        |         |        |         |         |      |
|    | pCtoluene_COO_TS                                | -1     | 1     | -551.809478     | -346263.84                  | -551.759720        | -346232.62                  |         |        |         |        |         |         |      |
| 8  | pCO <sub>2</sub> Ph <sub>2</sub> toluene_anion  | -1     | 1     | -615.272522     | -386087.51                  | -615.220511        | -386054.88                  | -16.801 | 9.239  | -27.266 | 0.039  | -10.464 | -9.200  |      |
|    | pCO <sub>2</sub> Ph <sub>2</sub> toluene_COO    | -1     | 1     | -803.913754     | -504461.70                  | -803.853532        | -504423.91                  |         |        |         |        |         |         |      |
|    | pCO <sub>2</sub> Ph <sub>2</sub> toluene_COO_TS | -1     | 1     | -803.872256     | -504435.66                  | -803.810019        | -504396.60                  |         |        |         |        |         |         |      |
| 9  | pNO <sub>2</sub> toluene_anion                  | -1     | 1     | -475.501742     | -298380.01                  | -475.459439        | -298353.46                  | -10.176 | 12.811 | -20.070 | 2.882  | -9.893  | -9.929  |      |
|    | pNO <sub>2</sub> toluene_COO                    | -1     | 1     | -664.132416     | -416747.57                  | -664.080992        | -416715.30                  |         |        |         |        |         |         |      |
|    | pNO <sub>2</sub> toluene_COO_TS                 | -1     | 1     | -664.095783     | -416724.58                  | -664.044416        | -416692.35                  |         |        |         |        |         |         |      |
| 10 | acetone_anion                                   | -1     | 1     | -192.615488     | -120866.17                  | -192.583402        | -120846.03                  | 12.496  | 8.629  | -22.591 | -0.893 | -10.095 | -9.522  |      |
|    | acetone_COO                                     | -1     | 1     | -381.249859     | -239236.05                  | -381.208973        | -239210.39                  |         |        |         |        |         |         |      |
|    | acetone_COO_TS                                  | -1     | 1     | -381.216194     | -239214.92                  | -381.174396        | -239188.69                  |         |        |         |        |         |         |      |
| 11 | dimethylpentanone_anion                         | -1     | 1     | -349.762574     | -219477.47                  | -349.716322        | -219448.45                  | -15.177 | 7.936  | -28.175 | -2.958 | -12.998 | -10.894 |      |
|    | dimethylpentanone_COO                           | -1     | 1     | -538.401217     | -337850.03                  | -538.350792        | -337818.39                  |         |        |         |        |         |         |      |
|    | dimethylpentanone_COO_TS                        | -1     | 1     | -538.364384     | -337826.92                  | -538.310606        | -337793.17                  |         |        |         |        |         |         |      |
| 12 | cyclobutanol_anion                              | -1     | 1     | -230.683917     | -144754.47                  | -230.651406        | -144734.07                  | -14.193 | 7.688  | -24.663 | -2.404 | -10.470 | -10.092 |      |
|    | cyclobutanol_COO                                | -1     | 1     | -419.320992     | -263126.05                  | -419.280279        | -263100.50                  |         |        |         |        |         |         |      |
|    | cyclobutanol_COO_TS                             | -1     | 1     | -419.286123     | -263104.17                  | -419.244807        | -263078.24                  |         |        |         |        |         |         |      |
| 13 | cyclohexanol_anion                              | -1     | 1     | -309.291258     | -194081.33                  | -309.254072        | -194058.00                  | -13.275 | 8.530  | -24.291 | -1.838 | -11.017 | -10.368 |      |
|    | cyclohexanol_COO                                | -1     | 1     | -497.926870     | -312451.99                  | -497.882353        | -312424.06                  |         |        |         |        |         |         |      |
|    | cyclohexanol_COO_TS                             | -1     | 1     | -497.892122     | -312430.19                  | -497.846571        | -312401.60                  |         |        |         |        |         |         |      |
| 14 | acetophenone_anion                              | -1     | 1     | -384.303018     | -241151.93                  | -384.264859        | -241127.99                  | -12.112 | 8.199  | -20.878 | -0.206 | -8.766  | -8.405  |      |
|    | acetophenone_COO                                | -1     | 1     | -572.936777     | -359521.43                  | -572.887700        | -359490.63                  |         |        |         |        |         |         |      |
|    | acetophenone_COO_TS                             | -1     | 1     | -572.904409     | -359501.12                  | -572.854758        | -359469.96                  |         |        |         |        |         |         |      |
| 15 | pNacetylphenone_anion                           | -1     | 1     | -476.558307     | -299043.01                  | -476.513412        | -299014.84                  | -7.848  | 10.055 | -18.097 | 0.124  | -10.248 | -9.931  |      |
|    | pNacetylphenone_COO                             | -1     | 1     | -665.185271     | -417408.24                  | -665.131821        | -417374.70                  |         |        |         |        |         |         |      |
|    | pNacetylphenone_COO_TS                          | -1     | 1     | -665.156741     | -417390.34                  | -665.102785        | -417356.48                  |         |        |         |        |         |         |      |
| 16 | pNMe <sub>2</sub> acetophenone_anion            | -1     | 1     | -518.214269     | -325182.53                  | -518.163503        | -325150.67                  | -14.582 | 8.680  | -24.760 | -1.323 | -10.178 | -10.003 |      |
|    | pNMe <sub>2</sub> acetophenone_COO              | -1     | 1     | -706.851964     | -443554.49                  | -706.792530        | -443517.20                  |         |        |         |        |         |         |      |
|    | pNMe <sub>2</sub> acetophenone_COO_TS           | -1     | 1     | -706.814893     | -443531.23                  | -706.755181        | -443493.76                  |         |        |         |        |         |         |      |
| 17 | Benzoylacetonitrile_anion                       | -1     | 1     | -476.586084     | -299060.44                  | -476.540736        | -299031.99                  | 9.805   | 16.154 | -0.783  | 5.593  | -10.588 | -10.561 |      |
|    | Benzoylacetonitrile_COO                         | -1     | 1     | -665.184916     | -417408.02                  | -665.131554        | -417374.54                  |         |        |         |        |         |         |      |
|    | Benzoylacetonitrile_COO_TS                      | -1     | 1     | -665.174798     | -417401.67                  | -665.121393        | -417368.16                  |         |        |         |        |         |         |      |
| 18 | Phbenzylketone_anion                            | -1     | 1     | -615.296022     | -386102.26                  | -615.243510        | -386069.31                  | -1.008  | 12.717 | -11.843 | 1.831  | -10.835 | -10.886 |      |
|    | Phbenzylketone_COO                              | -1     | 1     | -803.912086     | -504460.65                  | -803.851953        | -504422.92                  |         |        |         |        |         |         |      |
|    | Phbenzylketone_COO_TS                           | -1     | 1     | -803.890214     | -504446.93                  | -803.830163        | -504409.24                  |         |        |         |        |         |         |      |
| 19 | 2-Facetophenone_anion                           | -1     | 1     | -483.560058     | -303436.68                  | -483.517030        | -303409.68                  | -13.566 | 8.392  | -24.236 | -1.849 | -10.670 | -10.241 |      |
|    | 2-Facetophenone_COO                             | -1     | 1     | -672.196134     | -421807.63                  | -672.145223        | -421775.68                  |         |        |         |        |         |         |      |
|    | 2-Facetophenone_COO_TS                          | -1     | 1     | -672.161141     | -421785.67                  | -672.109546        | -421753.29                  |         |        |         |        |         |         |      |
| 20 | phepropanone_anion                              | -1     | 1     | -423.593386     | -265807.02                  | -423.548703        | -265778.98                  | -10.920 | 9.366  | -22.499 | -1.390 | -11.579 | -10.756 |      |
|    | phepropanone_COO                                | -1     | 1     | -612.225246     | -384175.32                  | -612.174128        | -384143.24                  |         |        |         |        |         |         |      |
|    | phepropanone_COO_TS                             | -1     | 1     | -612.192917     | -384155.03                  | -612.140488        | -384122.13                  |         |        |         |        |         |         |      |
| 21 | acetic acid tert-butyl ester_anion              | -1     | 1     | -385.722142     | -242042.45                  | -385.678231        | -242014.89                  | -18.469 | 6.245  | -29.475 | -2.758 | -11.006 | -9.003  |      |
|    | acetic acid tert-butyl ester_COO                | -1     | 1     | -574.366031     | -360418.30                  | -574.314772        | -360386.13                  |         |        |         |        |         |         |      |
|    | acetic acid tert-butyl ester_COO_TS             | -1     | 1     | -574.326647     | -360393.58                  | -574.272196        | -360359.42                  |         |        |         |        |         |         |      |
| 22 | <sup>t</sup> BuPhenylacetate_anion              | -1     | 1     | -616.715646     | -386993.09                  | -616.659625        | -386957.93                  | -7.466  | 9.346  | -18.802 | -0.850 | -11.336 | -10.196 |      |
|    | <sup>t</sup> BuPhenylacetate_COO                | -1     | 1     | -805.342001     | -505357.94                  | -805.279158        | -505318.50                  |         |        |         |        |         |         |      |
|    | <sup>t</sup> BuPhenylacetate_COO_TS             | -1     | 1     | -805.315209     | -505341.12                  | -805.250549        | -505300.55                  |         |        |         |        |         |         |      |
| 23 | Etacetoacetate_anion                            | -1     | 1     | -459.799940     | -288526.98                  | -459.753001        | -288497.52                  | 4.971   | 13.881 | -5.732  | 3.658  | -10.703 | -10.223 |      |
|    | Etacetoacetate_COO                              | -1     | 1     | -648.406475     | -406879.39                  | -648.351706        | -406845.02                  |         |        |         |        |         |         |      |
|    | Etacetoacetate_COO_TS                           | -1     | 1     | -648.392276     | -406870.48                  | -648.336742        | -406835.63                  |         |        |         |        |         |         |      |
| 24 | diMemalonate_anion                              | -1     | 1     | -495.740274     | -311079.88                  | -495.693686        | -311050.65                  | 4.037   | 14.900 | -6.820  | 4.390  | -10.857 | -10.510 |      |
|    | diMemalonate_COO                                | -1     | 1     | -684.348298     | -429433.23                  | -684.294125        | -429399.23                  |         |        |         |        |         |         |      |
|    | diMemalonate_COO_TS                             | -1     | 1     | -684.330987     | -429422.36                  | -684.276261        | -429388.02                  |         |        |         |        |         |         |      |
| 25 | diMeacetacetamid_anion                          | -1     | 1     | -439.899292     | -276039.13                  | -439.851955        | -276009.42                  | -1.772  | 12.579 | -11.653 | 1.840  | -9.881  | -10.739 |      |
|    | diMeacetacetamid_COO                            | -1     | 1     | -628.516573     | -394398.28                  | -628.460095        | -394362.84                  |         |        |         |        |         |         |      |
|    | diMeacetacetamid_COO_TS                         | -1     | 1     | -628.493704     | -394383.93                  | -628.438593        | -394349.35                  |         |        |         |        |         |         |      |
| 26 | 3-oxo-3-pyrrolidin-1-yl-propionitrile_anion     | -1     | 1     | -456.921803     | -286720.92                  | -456.875961        | -286692.15                  | 0.847   | 11.711 | -10.193 | 1.411  | -11.040 | -10.301 |      |
|    | 3-oxo-3-pyrrolidin-1-yl-propionitrile_COO       | -1     | 1     | -645.534911     | -405077.45                  | -645.481775        | -405044.11                  |         |        |         |        |         |         |      |
|    | 3-oxo-3-pyrrolidin-1-yl-propionitrile_COO_TS    | -1     | 1     | -645.517597     | -405066.59                  | -645.463283        | -405032.51                  |         |        |         |        |         |         |      |
| 27 | calcone_DA                                      | -2     | 1     | -654.031138     | -410412.68                  | -653.981641        | -410377.86                  | -27.570 | 6.186  | -38.096 | -4.168 | -10.526 | -10.355 |      |
|    | calcone_COO                                     | -2     | 1     | -842.695530     | -528797.63                  | -842.631921        | -528757.72                  |         |        |         |        |         |         |      |
|    | calcone_COO_TS                                  | -2     | 1     | -842.641737     | -528763.88                  | -842.577854        | -528723.79                  |         |        |         |        |         |         |      |
| 28 | flavone_DA                                      | -2     | 1     | -728.077459     | -456873.70                  | -728.023297        | -456839.71                  | -28.338 | 5.832  | -40.483 | -4.798 | -12.145 | -10.630 |      |
|    | flavone_COO                                     | -2     | 1     | -916.737075     | -575259.42                  | -916.677381        | -575221.96                  |         |        |         |        |         |         |      |
|    | flavone_COO_TS                                  | -2     | 1     | -916.682622     | -575225.25                  | -916.620513        | -575186.27                  |         |        |         |        |         |         |      |





## F. MARCUS FITTING

$\Delta G^0$  and  $\Delta G^\ddagger$  data for the carbanion series were evaluated by the Marcus model for group transfer in bimolecular reactions.

$$\Delta G^\ddagger = \Delta G_0^\ddagger + 0.5 \cdot \Delta G^0 + \{(\Delta G^0)^2 / (16 \cdot \Delta G_0^\ddagger)\} \quad (\text{eq. 3 in the main manuscript})$$

The data fitting gives values of  $\Delta G_0^\ddagger$  of  $14.2 \pm 0.4$  kcal/mol which are similar to the ones obtained with the linear fitting showed in Figure 2A in the main text:  $\Delta G_0^\ddagger = 12.7 \pm 0.3$  kcal/mol; obtained with the same by  $\omega$ b97XD/aug-cc-pvtz// $\omega$ b97XD/def2tzvp level of theory.

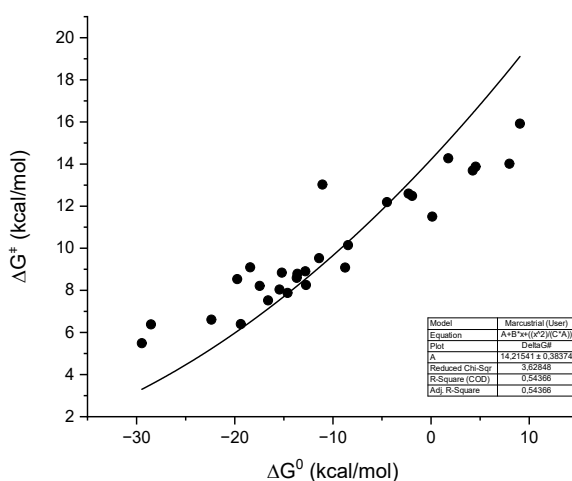

Figure S6. Quadratic fitting of calculated  $\Delta G^\ddagger$  vs  $\Delta G^0$ , according to the Marcus model for group transfer reactions (eq. 3 in the manuscript) for  $\omega$ b97XD/aug-cc-pvtz// $\omega$ b97XD/def2tzvp level of theory.

## G. ELECTROPHILICITY VALUES OF CO<sub>2</sub>

Electrophilicity values of CO<sub>2</sub> were estimated from the Mayr-Patz equation (eq. 6 in the main text) for the carbanions with reported values of N and S<sub>N</sub>.

$$\log k(20^\circ\text{C}) = S_N(N + E) \quad (\text{eq. 6 in the main text})$$

log k(20°C) was determined from the calculated ΔG<sup>‡</sup> according to the Eyring equation, assuming a unitary transmission coefficient:

$$k = (k_B T / h) \times \exp(-\Delta G^\ddagger / RT), \text{ and rearranging:}$$

$$\log k(20^\circ\text{C}) = 12.78 - \Delta G^\ddagger / (2.303 \times 0.582)$$

Table S8. ΔG<sup>‡</sup>, log k(20°C) and electrophilicity of CO<sub>2</sub>.

| Carbanion                                                                           | N     | S <sub>N</sub> | ΔG <sup>‡</sup><br>(kcalmol <sup>-1</sup> ) | log<br>k(20°C) | E(CO <sub>2</sub> ) | Ref                                             |
|-------------------------------------------------------------------------------------|-------|----------------|---------------------------------------------|----------------|---------------------|-------------------------------------------------|
| R <sub>2</sub> <sup>-</sup>                                                         | 24.16 | 0.68           | 12.2                                        | 3.67           | -18.8               | this work                                       |
| R <sub>2</sub> <sup>-</sup>                                                         | 24.16 | 0.68           | /                                           | 5.32           | -16.33              | Experimental<br>From ref. <sup>1</sup>          |
| R <sub>2</sub> <sup>-</sup>                                                         | 24.16 | 0.68           | 7.93                                        | 6.86           | -14.07              | b3lyp-D3/6-311+G(d,p)<br>From ref. <sup>1</sup> |
| R <sub>3</sub> <sup>-</sup>                                                         | 19.36 | 0.67           | 14.0                                        | 2.33           | -15.9               | this work                                       |
| R <sub>3</sub> <sup>-</sup>                                                         | 19.36 | 0.67           | 11.18                                       | 4.44           | -12.73              | b3lyp-D3/6-311+G(d,p)<br>From ref. <sup>1</sup> |
| R <sub>17</sub> <sup>-</sup>                                                        | 16.55 | 0.78           | 15.9                                        | 0.91           | -15.4               | this work                                       |
| R <sub>23</sub> <sup>-</sup>                                                        | 18.82 | 0.69           | 13.9                                        | 2.41           | -15.3               | this work                                       |
| R <sub>24</sub> <sup>-</sup>                                                        | 20.22 | 0.65           | 13.7                                        | 2.56           | -16.3               | this work                                       |
| 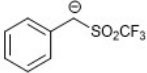 | 18.67 | 0.68           | 8.38                                        | 6.53           | -9.1                | b3lyp-D3/6-311+G(d,p)<br>From ref. <sup>1</sup> |

## H. ENTHALPIC AND ENTROPIC CONTRIBUTIONS

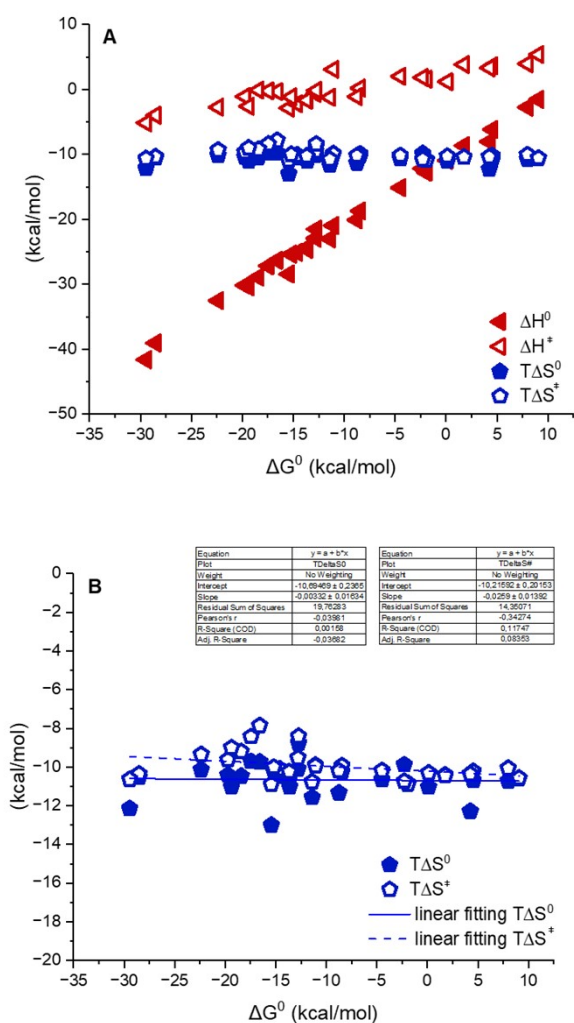

Figure S7. A) Dependence of enthalpic ( $\Delta H^0$  and  $\Delta H^\ddagger$ , red symbols) and entropic ( $T\Delta S^0$  and  $T\Delta S^\ddagger$ , blue symbols) respect to  $\Delta G^0$  of the carboxylation step. B) Linear fitting of the data for  $T\Delta S^0$  and  $T\Delta S^\ddagger$  give slope of  $0.00 \pm 0.01$  and and intercept of  $-0.03 \pm 0.01$  kcalmol<sup>-1</sup> respectively.



# I. $\Delta E^\ddagger$ DISTORTION: DIFFERENCE BETWEEN CARBANION AND $\text{CO}_2$ DISTORTION AT THE TRANSITION STATE

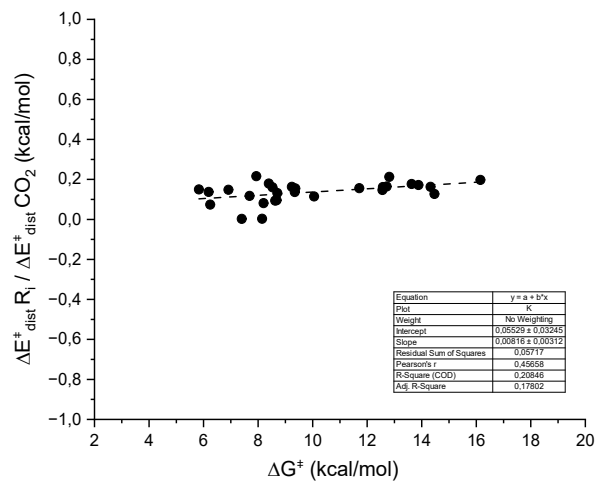

Figure S8.  $\Delta E_{\text{distortion}}^\ddagger$  ratio between carbanion and  $\text{CO}_2$  (SPE calculated at transition state geometries) respect to  $\Delta G^\ddagger$  of the carboxylation step.

## L. $\Delta E^\ddagger$ DISTORTION: ENERGY TABLES

Table S9. Potential energy of activation ( $\Delta E^\ddagger$ ) values calculated considering the electronic energies of  $\text{CO}_2$ ,  $\text{R}_i^-$  and  $\text{R}_i^-$ -TSs, obtained at  $\omega\text{B97XD}/\text{def2tzvp}/\omega\text{B97XD}/\text{def2tzvp}$  level of theory.

| i  | species                                     | charge | mult. | E (hartree) | E        | (kcal/mol)                  |                             |                                     |
|----|---------------------------------------------|--------|-------|-------------|----------|-----------------------------|-----------------------------|-------------------------------------|
|    |                                             |        |       |             |          | $\Delta E$ distortion total | $\Delta E$ distortion anion | $\Delta E$ distortion $\text{CO}_2$ |
|    | $\text{CO}_2$                               | 0      | 1     | -188.608    | -118353  |                             |                             |                                     |
| 1  | cyclopentadiene_anion                       | -1     | 1     | -193.614    | -121494  | 23.0163                     | 2.599333                    | 20.417                              |
|    | cyclopentadiene_distorted                   | -1     | 1     | -193.609    | -121492  |                             |                             |                                     |
|    | distorted $\text{CO}_2$                     | 0      | 1     | -188.575    | -118333  |                             |                             |                                     |
| 2  | indene_anion                                | -1     | 1     | -347.264    | -217911  | 17.81098                    | 2.280872                    | 15.530                              |
|    | indene_distorted                            | -1     | 1     | -347.26     | -217909  |                             |                             |                                     |
|    | distorted $\text{CO}_2$                     | 0      | 1     | -188.583    | -118338  |                             |                             |                                     |
| 3  | malonitrile_anion                           | -1     | 1     | -224.519    | -140888  | 17.68184                    | 2.472388                    | 15.209                              |
|    | malonitrile_distorted                       | -1     | 1     | -224.515    | -140886  |                             |                             |                                     |
|    | distorted $\text{CO}_2$                     | 0      | 1     | -188.584    | -118338  |                             |                             |                                     |
| 4  | acetylene_anion                             | -1     | 1     | -76.8211    | -48206   | 7.940193                    | 0.021273                    | 7.919                               |
|    | acetylene_distorted                         | -1     | 1     | -76.821     | -48205.9 |                             |                             |                                     |
|    | distorted $\text{CO}_2$                     | 0      | 1     | -188.595    | -118345  |                             |                             |                                     |
| 5  | phenylacetylene_anion                       | -1     | 1     | -307.881    | -193199  | 8.100145                    | 0.023406                    | 8.077                               |
|    | phenylacetylene_distorted                   | -1     | 1     | -307.881    | -193199  |                             |                             |                                     |
|    | distorted $\text{CO}_2$                     | 0      | 1     | -188.595    | -118345  |                             |                             |                                     |
| 6  | diphenylmethane_anion                       | -1     | 1     | -502.088    | -315065  | 8.74786                     | 1.126191                    | 7.622                               |
|    | diphenylmethane_distorted                   | -1     | 1     | -502.087    | -315064  |                             |                             |                                     |
|    | distorted $\text{CO}_2$                     | 0      | 1     | -188.596    | -118346  |                             |                             |                                     |
| 7  | pCNtoluene_anion                            | -1     | 1     | -363.29     | -227968  | 9.63974                     | 1.121109                    | 8.519                               |
|    | pCNtoluene_distorted                        | -1     | 1     | -363.289    | -227967  |                             |                             |                                     |
|    | distorted $\text{CO}_2$                     | 0      | 1     | -188.594    | -118345  |                             |                             |                                     |
| 8  | pCOPhtoluene_anion                          | -1     | 1     | -615.44     | -386194  | 11.20757                    | 1.570343                    | 9.637                               |
|    | pCOPhtoluene_distorted                      | -1     | 1     | -615.437    | -386193  |                             |                             |                                     |
|    | distorted $\text{CO}_2$                     | 0      | 1     | -188.593    | -118344  |                             |                             |                                     |
| 9  | pNO <sub>2</sub> toluene_anion              | -1     | 1     | -475.586    | -298435  | 14.83157                    | 2.598894                    | 12.233                              |
|    | pNO <sub>2</sub> toluene_distorted          | -1     | 1     | -475.582    | -298432  |                             |                             |                                     |
|    | distorted $\text{CO}_2$                     | 0      | 1     | -188.588    | -118341  |                             |                             |                                     |
| 10 | acetone_anion                               | -1     | 1     | -192.66     | -120896  | 10.03639                    | 0.857743                    | 9.179                               |
|    | acetone_distorted                           | -1     | 1     | -192.659    | -120895  |                             |                             |                                     |
|    | distorted $\text{CO}_2$                     | 0      | 1     | -188.593    | -118344  |                             |                             |                                     |
| 11 | dimethylpentanone_anion                     | -1     | 1     | -349.911    | -219573  | 8.423187                    | 1.495606                    | 6.928                               |
|    | dimethylpentanone_distorted                 | -1     | 1     | -349.909    | -219571  |                             |                             |                                     |
|    | distorted $\text{CO}_2$                     | 0      | 1     | -188.597    | -118346  |                             |                             |                                     |
| 12 | cyclobutanone_anion                         | -1     | 1     | -230.735    | -144788  | 8.582951                    | 0.900476                    | 7.682                               |
|    | cyclobutanone_distorted                     | -1     | 1     | -230.734    | -144788  |                             |                             |                                     |
|    | distorted $\text{CO}_2$                     | 0      | 1     | -188.596    | -118346  |                             |                             |                                     |
| 13 | cyclohexanone_anion                         | -1     | 1     | -309.399    | -194151  | 9.784004                    | 1.351844                    | 8.432                               |
|    | cyclohexanone_distorted                     | -1     | 1     | -309.397    | -194150  |                             |                             |                                     |
|    | distorted $\text{CO}_2$                     | 0      | 1     | -188.595    | -118345  |                             |                             |                                     |
| 14 | acetophenone_anion                          | -1     | 1     | -384.398    | -241213  | 10.49184                    | 0.787274                    | 9.705                               |
|    | acetophenone_distorted                      | -1     | 1     | -384.396    | -241212  |                             |                             |                                     |
|    | distorted $\text{CO}_2$                     | 0      | 1     | -188.592    | -118344  |                             |                             |                                     |
| 15 | pCNacetophenone_anion                       | -1     | 1     | -476.648    | -299101  | 12.11614                    | 1.244916                    | 10.871                              |
|    | pCNacetophenone_distorted                   | -1     | 1     | -476.646    | -299100  |                             |                             |                                     |
|    | distorted $\text{CO}_2$                     | 0      | 1     | -188.591    | -118342  |                             |                             |                                     |
| 16 | pNMe <sub>2</sub> acetophenone_anion        | -1     | 1     | -518.375    | -325285  | 9.573663                    | 0.838165                    | 8.735                               |
|    | pNMe <sub>2</sub> acetophenone_distorted    | -1     | 1     | -518.373    | -325284  |                             |                             |                                     |
|    | distorted $\text{CO}_2$                     | 0      | 1     | -188.594    | -118345  |                             |                             |                                     |
| 17 | Benzoylacetonitrile_anion                   | -1     | 1     | -476.676    | -299119  | 20.95926                    | 3.456135                    | 17.503                              |
|    | Benzoylacetonitrile_distorted               | -1     | 1     | -476.67     | -299115  |                             |                             |                                     |
|    | distorted $\text{CO}_2$                     | 0      | 1     | -188.58     | -118336  |                             |                             |                                     |
| 18 | Phbenzylketone_anion                        | -1     | 1     | -615.464    | -386209  | 16.84311                    | 2.380018                    | 14.463                              |
|    | Phbenzylketone_distorted                    | -1     | 1     | -615.46     | -386207  |                             |                             |                                     |
|    | distorted $\text{CO}_2$                     | 0      | 1     | -188.585    | -118339  |                             |                             |                                     |
| 19 | 2-Facetophenone_anion                       | -1     | 1     | -483.644    | -303491  | 8.708578                    | 1.324422                    | 7.384                               |
|    | 2-Facetophenone_distorted                   | -1     | 1     | -483.642    | -303490  |                             |                             |                                     |
|    | distorted $\text{CO}_2$                     | 0      | 1     | -188.596    | -118346  |                             |                             |                                     |
| 20 | phepropanone_anion                          | -1     | 1     | -423.712    | -265883  | 10.82661                    | 1.451743                    | 9.375                               |
|    | phepropanone_distorted                      | -1     | 1     | -423.71     | -265882  |                             |                             |                                     |
|    | distorted $\text{CO}_2$                     | 0      | 1     | -188.593    | -118344  |                             |                             |                                     |
| 21 | acetic acid tert-butyl ester_anion          | -1     | 1     | -385.849    | -242124  | 7.187432                    | 0.492972                    | 6.694                               |
|    | acetic acid tert-butyl ester_distorted      | -1     | 1     | -385.848    | -242123  |                             |                             |                                     |
|    | distorted $\text{CO}_2$                     | 0      | 1     | -188.597    | -118347  |                             |                             |                                     |
| 22 | <sup>t</sup> BuPhenylacetate_anion          | -1     | 1     | -616.917    | -387121  | 12.2055                     | 1.465486                    | 10.740                              |
|    | <sup>t</sup> BuPhenylacetate_distorted      | -1     | 1     | -616.914    | -387120  |                             |                             |                                     |
|    | distorted $\text{CO}_2$                     | 0      | 1     | -188.591    | -118343  |                             |                             |                                     |
| 23 | Etacetoacetate_anion                        | -1     | 1     | -459.908    | -288596  | 18.89193                    | 2.773404                    | 16.119                              |
|    | Etacetoacetate_distorted                    | -1     | 1     | -459.903    | -288594  |                             |                             |                                     |
|    | distorted $\text{CO}_2$                     | 0      | 1     | -188.582    | -118341  |                             |                             |                                     |
| 24 | diMemalonate_anion                          | -1     | 1     | -495.825    | -311145  | 17.87589                    | 2.685515                    | 15.190                              |
|    | diMemalonate_distorted                      | -1     | 1     | -495.821    | -311142  |                             |                             |                                     |
|    | diMemalonate_CO <sub>2</sub> _TS            | 0      | 1     | -188.583    | -118338  |                             |                             |                                     |
| 25 | diMeacetoacetamid_anion                     | -1     | 1     | -440.019    | -276116  | 16.42488                    | 2.281939                    | 14.143                              |
|    | diMeacetoacetamid_distorted                 | -1     | 1     | -440.016    | -276114  |                             |                             |                                     |
|    | distorted $\text{CO}_2$                     | 0      | 1     | -188.585    | -118339  |                             |                             |                                     |
| 26 | 3-oxo-3-pyrrolidin-1-yl-propionitrile_anion | -1     | 1     | -457.041    | -286797  | 14.60987                    | 1.972388                    | 12.637                              |
|    | 3-oxo-3-pyrrolidin-1-yl-propionitrile_dist  | -1     | 1     | -457.037    | -286795  |                             |                             |                                     |
|    | distorted $\text{CO}_2$                     | 0      | 1     | -188.588    | -118341  |                             |                             |                                     |
| 27 | calcene_DA                                  | -2     | 1     | -654.217    | -410527  | 5.284133                    | 0.637487                    | 4.647                               |
|    | calcene_distorted                           | -2     | 1     | -654.216    | -410527  |                             |                             |                                     |
|    | distorted $\text{CO}_2$                     | 0      | 1     | -188.601    | -118349  |                             |                             |                                     |
| 28 | flavone_DA                                  | -2     | 1     | -728.24     | -456978  | 4.536141                    | 0.591051                    | 3.945                               |
|    | flavone_distorted                           | -2     | 1     | -728.24     | -456977  |                             |                             |                                     |
|    | distorted $\text{CO}_2$                     | 0      | 1     | -188.602    | -118349  |                             |                             |                                     |

## M. O-C-O ANGLE DISTORTION AND C-C DISTANCE IN THE TRANSITION STATE

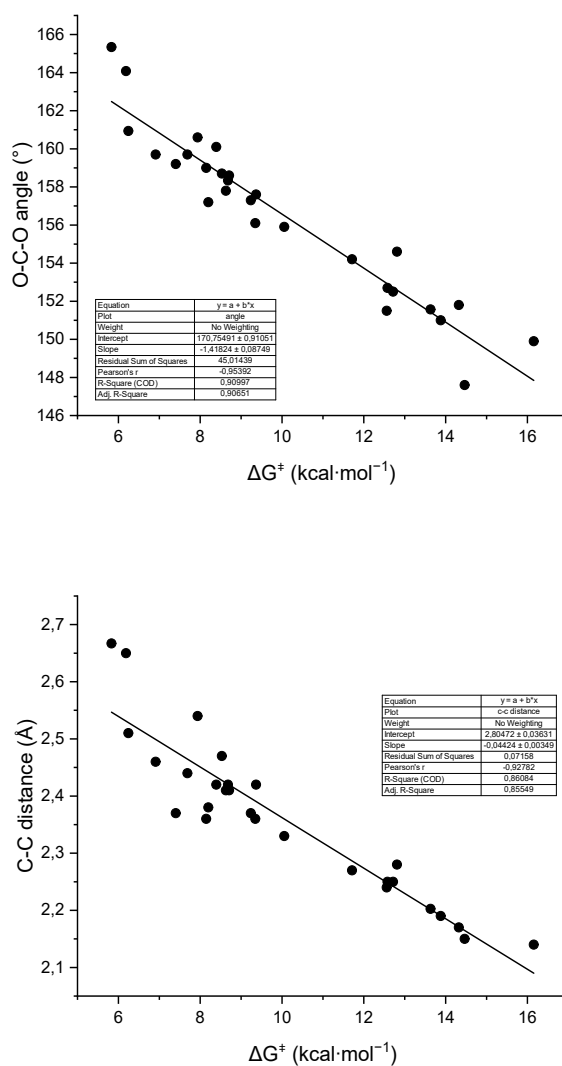

Figure S9. Dependence of O-C-O angle (bending of  $\text{CO}_2$ , panel A) and of C-C distance (formation of the new C-C bond between  $\text{R}_i^-$  and  $\text{CO}_2$ , panel B) in the transition state with respect to  $\Delta G^\ddagger$  of the carboxylation reaction. Linear fittings of the data give slope values of  $-1.41 \pm 0.09^\circ$  for the O-C-O angle and to a concomitant reduction of the C-C distance with a slope value of  $-0.044 \pm 0.003$ .

## N. OPTIMIZED GEOMETRIES

28 organic molecules ( $R_i-H$ ) were considered for the linear correlations. The carbon atom which is considered to attack the  $CO_2$  from the anion  $R_i^-$  is evidenced.

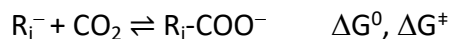

### N.1 B3LYP/6-311G(D,P)

| CO <sub>2</sub> |                                                                                                                                                                                                                                                                                                                                                                                                                                                                                                                                                                            |                                                                                                                                                                                                                                                                                                                                                                                                                                                                                                                                                                                                                                                                                                                                                                                       |                                                                                                                                                                                                                                                                                                                                                                                                                                                                                                                                                                                                                                                                                                                                                                                     |
|-----------------|-------------------------------------------------------------------------------------------------------------------------------------------------------------------------------------------------------------------------------------------------------------------------------------------------------------------------------------------------------------------------------------------------------------------------------------------------------------------------------------------------------------------------------------------------------------------------------------------------------------------------------------------------------------|---------------------------------------------------------------------------------------------------------------------------------------------------------------------------------------------------------------------------------------------------------------------------------------------------------------------------------------------------------------------------------------------------------------------------------------------------------------------------------------------------------------------------------------------------------------------------------------------------------------------------------------------------------------------------------------------------------------------------------------------------------------------------------------|-------------------------------------------------------------------------------------------------------------------------------------------------------------------------------------------------------------------------------------------------------------------------------------------------------------------------------------------------------------------------------------------------------------------------------------------------------------------------------------------------------------------------------------------------------------------------------------------------------------------------------------------------------------------------------------------------------------------------------------------------------------------------------------|
|                 | O 1<br>C 0.00000000 0.00000000 0.00003100<br>O 0.00000000 0.00000000 1.16031300<br>O 0.00000000 0.00000000 -1.16033700                                                                                                                                                                                                                                                                                                                                                                                                                                                                                                                                      |                                                                                                                                                                                                                                                                                                                                                                                                                                                                                                                                                                                                                                                                                                                                                                                       |                                                                                                                                                                                                                                                                                                                                                                                                                                                                                                                                                                                                                                                                                                                                                                                     |
| 1               | $R_i^-$ coordinates                                                                                                                                                                                                                                                                                                                                                                                                                                                                                                                                                                                                                                         | $R_i-COO^-$ coordinates                                                                                                                                                                                                                                                                                                                                                                                                                                                                                                                                                                                                                                                                                                                                                               | $R_i-TS$ coordinates                                                                                                                                                                                                                                                                                                                                                                                                                                                                                                                                                                                                                                                                                                                                                                |
| 1               |                                                                                                                                                                                                                                                                                                                                                                                                                                                                                                                                                                            |                                                                                                                                                                                                                                                                                                                                                                                                                                                                                                                                                                                                                                                                                                      |                                                                                                                                                                                                                                                                                                                                                                                                                                                                                                                                                                                                                                                                                                  |
|                 | -1 1<br>C -1.09850400 -0.49226600 -0.0002400<br>C -0.80748200 0.89269900 0.00038800<br>C 0.59935100 1.04352600 0.0003300<br>H -2.08907000 -0.93666000 0.00029800<br>H -1.53506400 1.69872600 -0.00141300<br>H 1.14026700 1.98501800 0.00006700<br>C 1.17793500 -0.24762900 -0.00024800<br>C 0.12854500 -1.19634100 -0.00019200<br>H 0.24450200 -2.27593200 0.00052000<br>H 2.24029300 -0.47108300 0.00078500                                                                                                                                                                                                                                                | -1 1<br>C 0.82613700 1.18735600 0.14879000<br>C 2.02250600 0.74700000 -0.29577400<br>C 2.05031200 -0.71954900 -0.21654100<br>H 0.48421500 2.21147000 0.19699500<br>H 2.83545100 1.35886700 -0.66863800<br>H 2.88788600 -1.33614700 -0.52106800<br>C 0.86971400 -1.15501900 0.27279400<br>C -0.02029200 0.01740100 0.55808700<br>H -0.21334100 0.07204500 1.64272900<br>H 0.57061300 -2.18137500 0.43199100<br>C -1.49670500 -0.01942000 0.04582000<br>O -1.94929200 -1.15100400 -0.31776100<br>O -2.06006600 1.09207000 -0.13364300                                                                                                                                                                                                                                                   | -1 1<br>C -1.98505700 -0.61768600 -0.08020500<br>C -1.09023100 -0.73102000 0.97245800<br>C -1.71189000 0.60199800 -0.78373400<br>H -2.23373200 0.95000000 -1.66783200<br>C -0.18073900 0.37631800 0.91054400<br>H 0.40773400 0.72419300 1.74934600<br>C -0.64275300 1.22848400 -0.16381900<br>H -0.19261100 2.17197000 -0.44848700<br>C 1.57691900 -0.21463900 -0.16484100<br>C 1.32526600 -1.12218800 -0.90002100<br>O 2.42567400 0.51946800 0.26136800<br>H -2.74966300 -1.33820500 -0.34974700<br>H -1.03674500 -1.54692500 1.68352700                                                                                                                                                                                                                                           |
| 2               |                                                                                                                                                                                                                                                                                                                                                                                                                                                                                                                                                                          |                                                                                                                                                                                                                                                                                                                                                                                                                                                                                                                                                                                                                                                                                                    |                                                                                                                                                                                                                                                                                                                                                                                                                                                                                                                                                                                                                                                                                                |
|                 | -1 1<br>C -0.28416100 -0.73129000 0.00003800<br>C -0.28416300 0.73129400 -0.00006600<br>C 0.95035900 1.41703900 -0.00012500<br>C 2.14415000 0.70886800 -0.00006200<br>C 2.14415000 -0.70887000 0.00007600<br>C 0.95035700 -1.41703800 0.00011800<br>C -1.63863700 -1.15690300 -0.00016900<br>C -2.44539600 -0.00000200 0.00000700<br>C -1.63863900 1.15690200 0.00018200<br>H 0.96891300 2.50557100 -0.00013800<br>H 3.09024700 1.24291900 -0.00007500<br>H 3.09024700 -1.24292000 0.00011400<br>H 0.96890700 -2.50557000 0.00011400<br>H -1.98754800 -2.18315200 -0.00038100<br>H -3.53133000 0.00000100 0.00043000<br>H -1.98756000 2.18314800 0.00032700 | -1 1<br>C -1.05957400 0.98001700 -0.07126500<br>C -0.33061300 -0.16591000 0.32293500<br>C -0.96795300 -1.39551400 0.42573900<br>C -2.33473500 -1.48158300 0.13557700<br>C -3.05499900 -0.34797400 -0.25263600<br>C -2.42235400 0.89267400 -0.36094200<br>C -0.13728600 2.11827100 -0.09372400<br>C 1.08973300 1.70261500 0.27667400<br>H -0.40555500 -2.27701800 0.70723700<br>H -2.84067700 -2.43841900 0.20994800<br>H -4.11381300 -0.43365400 -0.47298800<br>H -2.98353300 1.77131800 -0.66285300<br>H -0.41526500 3.12625000 -0.37749400<br>H 1.98355000 2.30731800 0.33536000<br>C 1.10141200 0.22718100 0.57826200<br>H 1.34475100 0.07191700 1.64068500<br>C 2.25609600 -0.58592700 -0.16119400<br>O 1.97905000 -1.74659700 -0.52606400<br>O 3.34497200 0.02274500 -0.24599300 | -1 1<br>C 0.95439700 0.96542800 0.03926100<br>C 0.28253500 -0.11705900 -0.63571800<br>C 0.91350300 -1.36850600 -0.73439300<br>C 2.17072100 -1.55357300 -0.16824300<br>C 2.81857500 -0.50080300 0.51096000<br>C 2.21724800 0.74856200 0.61817900<br>C 0.10931100 2.12357300 -0.05200000<br>H 0.42223900 -2.19153800 -1.24694200<br>H 2.66076800 -2.51914000 -0.24784700<br>H 3.79697800 -0.66966700 0.95001900<br>H 2.72704700 1.55457500 1.14014600<br>H 0.32776900 3.09624000 0.37217600<br>C -1.00707700 0.37246200 -1.06680600<br>H -1.60663900 -0.08938300 -1.83927500<br>C -1.02977600 1.77041800 -0.75515700<br>H -1.85166000 2.43733500 -0.99088500<br>C -2.20014400 -0.63039800 0.54455700<br>O -2.02120100 -0.02639000 1.55195400<br>O -2.71033100 -1.53349100 -0.04460900 |
| 3               |                                                                                                                                                                                                                                                                                                                                                                                                                                                                                                                                                                          |                                                                                                                                                                                                                                                                                                                                                                                                                                                                                                                                                                                                                                                                                                    |                                                                                                                                                                                                                                                                                                                                                                                                                                                                                                                                                                                                                                                                                                |
|                 | -1 1<br>C -0.00004900 0.73175700 -0.00010100<br>H 0.00032000 1.81410000 0.00045900<br>C -1.21618000 0.05845900 -0.00003600<br>N -2.24849800 -0.49327300 0.00004600<br>C 1.21614000 0.05838100 -0.00006100<br>N 2.24852800 -0.49325300 0.00005700                                                                                                                                                                                                                                                                                                                                                                                                            | -1 1<br>C 0.30838800 0.03659800 -0.49960900<br>H 0.22505100 0.03328700 -1.59101200<br>C 0.86825700 1.30838500 -0.07726700<br>N 1.28791500 2.32362700 0.27593100<br>C -1.28940800 -0.14736700 0.00278400<br>O -1.88212800 0.92668300 0.09239900<br>O -1.61087500 -1.32573000 0.14595900<br>C 1.14468500 -1.07848900 -0.09108300<br>N 1.78743400 -1.97443800 0.24909800                                                                                                                                                                                                                                                                                                                                                                                                                 | -1 1<br>C -0.51974600 0.02468100 0.55586100<br>H -0.32073300 0.02718100 1.62593200<br>C -1.05816500 1.24953800 0.08002000<br>N -1.43969800 2.26579500 -0.33038500<br>C 1.50799000 -0.06095900 -0.02682400<br>O 1.87934400 1.07303800 -0.05582400<br>O 1.76612800 -1.22034500 -0.14300900<br>C -1.16122500 -1.15879800 0.10445400<br>N -1.62546800 -2.14800900 -0.28620400                                                                                                                                                                                                                                                                                                                                                                                                           |

|   |                                                                                                                                                                                                                                                                                                                                                                                                                                                                                                                                                                                                                                                                                                                                                                                                                                                                                                                                                                                                                         |                                                                                                                                                                                                                                                                                                                                                                                                                                                                                                                                                                                                                                                                                                                                                                                                                                                                                                                                                                                                                                                                                                                                                      |                                                                                                                                                                                                                                                                                                                                                                                                                                                                                                                                                                                                                                                                                                                                                                                                                                                                                                                                                                                                                                                                                                                                                  |
|---|-------------------------------------------------------------------------------------------------------------------------------------------------------------------------------------------------------------------------------------------------------------------------------------------------------------------------------------------------------------------------------------------------------------------------------------------------------------------------------------------------------------------------------------------------------------------------------------------------------------------------------------------------------------------------------------------------------------------------------------------------------------------------------------------------------------------------------------------------------------------------------------------------------------------------------------------------------------------------------------------------------------------------|------------------------------------------------------------------------------------------------------------------------------------------------------------------------------------------------------------------------------------------------------------------------------------------------------------------------------------------------------------------------------------------------------------------------------------------------------------------------------------------------------------------------------------------------------------------------------------------------------------------------------------------------------------------------------------------------------------------------------------------------------------------------------------------------------------------------------------------------------------------------------------------------------------------------------------------------------------------------------------------------------------------------------------------------------------------------------------------------------------------------------------------------------|--------------------------------------------------------------------------------------------------------------------------------------------------------------------------------------------------------------------------------------------------------------------------------------------------------------------------------------------------------------------------------------------------------------------------------------------------------------------------------------------------------------------------------------------------------------------------------------------------------------------------------------------------------------------------------------------------------------------------------------------------------------------------------------------------------------------------------------------------------------------------------------------------------------------------------------------------------------------------------------------------------------------------------------------------------------------------------------------------------------------------------------------------|
| 4 |                                                                                                                                                                                                                                                                                                                                                                                                                                                                                                                                                                                                                                                                                                                                                                                                                                                                                                                                        |                                                                                                                                                                                                                                                                                                                                                                                                                                                                                                                                                                                                                                                                                                                                                                                                                                                                                                                                                                                                                                                                     |                                                                                                                                                                                                                                                                                                                                                                                                                                                                                                                                                                                                                                                                                                                                                                                                                                                                                                                                                                                                                                                               |
|   | <p>-11<br/>C 0.00000000 0.00000000 -0.48893100<br/>H 0.00000000 0.00000000 -1.55828700<br/>C 0.00000000 0.00000000 0.74864500</p>                                                                                                                                                                                                                                                                                                                                                                                                                                                                                                                                                                                                                                                                                                                                                                                                                                                                                       | <p>-11<br/>C 0.00000000 0.00000000 2.12304600<br/>H 0.00000000 0.00000000 3.18713700<br/>C 0.00000000 0.00000000 0.91483300<br/>C 0.00000000 0.00000000 -0.58678600<br/>O 0.00000000 1.13081700 -1.11835600<br/>O 0.00000000 -1.13081700 -1.11835600</p>                                                                                                                                                                                                                                                                                                                                                                                                                                                                                                                                                                                                                                                                                                                                                                                                                                                                                             | <p>-11<br/>C -2.63931900 0.00152900 0.00047900<br/>H -3.70545900 -0.07066500 0.00013200<br/>C -1.40888700 0.09122300 -0.00073400<br/>C 1.15305700 -0.01554200 0.00001300<br/>O 1.37989300 1.13141100 0.00010700<br/>O 1.25465100 -1.18048500 0.00005900</p>                                                                                                                                                                                                                                                                                                                                                                                                                                                                                                                                                                                                                                                                                                                                                                                                                                                                                      |
| 5 |                                                                                                                                                                                                                                                                                                                                                                                                                                                                                                                                                                                                                                                                                                                                                                                                                                                                                                                                        |                                                                                                                                                                                                                                                                                                                                                                                                                                                                                                                                                                                                                                                                                                                                                                                                                                                                                                                                                                                                                                                                     |                                                                                                                                                                                                                                                                                                                                                                                                                                                                                                                                                                                                                                                                                                                                                                                                                                                                                                                                                                                                                                                               |
|   | <p>-11<br/>C 3.36072700 0.00002400 -0.00004800<br/>C 2.11755600 -0.00003500 0.00002600<br/>C 0.68866200 -0.00002800 0.00002800<br/>C -0.04998100 1.20536500 0.00001500<br/>C -0.05001600 -1.20538700 0.00001600<br/>C -1.44134600 1.20319400 -0.00000600<br/>H 0.48978400 2.14589200 0.00001900<br/>C -1.44139000 -1.20316400 -0.00000600<br/>H 0.48970700 -2.14594000 0.00001900<br/>C -2.14943200 0.00002400 -0.00001800<br/>H -1.97725500 2.14688400 -0.00001700<br/>H -1.97732500 -2.14683900 -0.00001800<br/>H -3.23359400 0.00004700 -0.00003600</p>                                                                                                                                                                                                                                                                                                                                                                                                                                                              | <p>-11<br/>C -2.95849700 -1.20553300 0.00024000<br/>C -1.56750000 -1.21023700 0.00041300<br/>C -0.84839300 0.00001800 0.00018100<br/>C -1.56754200 1.21025200 -0.00021800<br/>C -2.95853500 1.20550000 -0.00039000<br/>C -3.66076200 -0.00003000 -0.00016400<br/>H -3.49600200 -2.14718400 0.00041900<br/>H -1.02548400 -2.14848500 0.00072600<br/>H -1.02555300 2.14851500 -0.00038700<br/>H -3.49607600 2.14713100 -0.00070000<br/>H -7.44622000 -0.00004700 -0.00029900<br/>C 0.57906200 0.00005000 0.00037800<br/>C 1.79240800 0.00004200 0.00054700<br/>C 3.29133400 0.00002000 -0.00009400<br/>O 3.82412000 0.00075100 1.13031800<br/>O 3.82316500 -0.00079000 -1.13095700</p>                                                                                                                                                                                                                                                                                                                                                                                                                                                                 | <p>-11<br/>C 3.19609400 -1.19945500 0.09878900<br/>C 1.80469100 -1.20189400 0.09888200<br/>C 1.06939000 0.00001200 0.00000700<br/>C 1.80471700 1.20190300 -0.09887500<br/>C 3.19612000 1.19943200 -0.09879500<br/>C 3.90317600 -0.00001900 -0.00000700<br/>H 3.73252600 -2.13964000 0.17614600<br/>H 1.26452100 -2.13891800 0.17585700<br/>H 1.26456700 2.13893800 -0.17584500<br/>H 3.73230200 2.13960500 -0.17615700<br/>H 4.98730400 -0.00003100 -0.00001200<br/>C -0.35988800 0.00002700 0.00001400<br/>C -1.59856400 0.00003900 0.00002100<br/>C -4.10161700 -0.00000800 -0.00000800<br/>O -4.27904900 -0.24044000 -1.13186900<br/>O -4.27908500 0.24041800 1.13184900</p>                                                                                                                                                                                                                                                                                                                                                                                                                                                                  |
| 6 |                                                                                                                                                                                                                                                                                                                                                                                                                                                                                                                                                                                                                                                                                                                                                                                                                                                                                                                                        |                                                                                                                                                                                                                                                                                                                                                                                                                                                                                                                                                                                                                                                                                                                                                                                                                                                                                                                                                                                                                                                                     |                                                                                                                                                                                                                                                                                                                                                                                                                                                                                                                                                                                                                                                                                                                                                                                                                                                                                                                                                                                                                                                               |
|   | <p>-11<br/>C -0.00001100 -0.97810800 -0.00006300<br/>H -0.00003500 -2.06744100 0.00001300<br/>C -1.30303300 -0.40531600 -0.00827600<br/>C -2.43776500 -1.27409000 0.13444900<br/>C -1.63952900 0.97739900 -0.18025400<br/>C -3.74294200 -0.81593800 0.13466000<br/>H -2.25210700 -2.33869100 0.25368600<br/>C -2.95718300 1.42429200 -0.17920600<br/>H 0.86612400 1.70449700 -0.35881600<br/>C -4.03415500 0.54972400 -0.01423100<br/>H -4.55338300 -1.53053200 0.25380300<br/>H -3.14539000 2.48595700 -0.31931100<br/>H -5.05639800 0.91032900 -0.00809600<br/>C 1.30302400 -0.40531800 0.00821800<br/>C -2.43780400 -1.27409100 -0.13444800<br/>C 1.63950400 0.97737600 0.18019600<br/>C 3.74296200 -0.81593200 -0.13459900<br/>H 2.25215800 -2.33869600 -0.25369600<br/>C 2.95717000 1.42429100 0.17921500<br/>H 0.86611300 1.70450200 0.35872200<br/>C 4.03415700 0.54975200 0.01431500<br/>H 4.55341800 -1.53051600 -0.25369500<br/>H 3.14532400 2.48596400 0.31932100<br/>H 5.05639700 0.91036700 0.00821500</p> | <p>-11<br/>C 0.01571000 0.76004100 -0.62839800<br/>H 0.03880200 0.88903900 -1.71187300<br/>C 1.25762200 -0.03040700 -0.24659200<br/>C 2.21089600 -0.34265000 -1.22405700<br/>C 1.50156500 -0.45163500 1.06850800<br/>C 3.37155000 -1.04911400 -0.90512800<br/>H 2.04105700 -0.02830400 -2.24916300<br/>C 2.65808700 -1.15777500 1.39046200<br/>H 0.78516900 -0.20689000 1.84095000<br/>C 3.60032800 -1.46115900 0.40578000<br/>H 4.09318300 -1.27792000 -1.68227600<br/>H 2.82640900 -1.47281800 2.41512800<br/>H 4.49950400 -2.01201700 0.65885400<br/>C -1.27293300 0.01152900 -0.30051900<br/>C -1.85189900 -0.81009800 -1.27818500<br/>C -1.90756800 0.09737300 0.94618300<br/>C -3.01806500 -1.52915800 -1.02162000<br/>H -1.38002800 -0.88701800 -2.25296400<br/>C -3.07455900 -0.62131800 1.20568600<br/>H -1.48095900 0.75032600 1.69712900<br/>C -3.63510000 -1.43969600 0.22583700<br/>H -3.44544000 -2.15669300 -1.79658100<br/>H -3.54993700 -0.53705000 2.17748000<br/>H -4.54295400 -1.99685000 0.42938400<br/>C 0.04065800 2.22175400 -0.02717300<br/>O 0.16470000 2.32528900 1.21764300<br/>O -0.07252100 3.14345600 -0.86648800</p> | <p>-11<br/>C -0.01315800 0.33388100 -0.73162000<br/>H 0.00652700 1.03033100 -1.56620500<br/>C 1.27943200 -0.23095700 -0.44300700<br/>C 2.43383500 0.38204800 -0.02267600<br/>C 1.55082600 -1.37087800 0.36825900<br/>C 3.72025200 -0.07526600 -0.79173200<br/>H 2.28668400 1.24546400 -1.66530200<br/>C 2.84832500 -1.82671300 0.58994400<br/>H 0.73557200 -1.92740700 0.80787700<br/>C 3.95453000 -1.18917100 0.02738200<br/>H 4.55662300 0.43743300 -1.25890700<br/>H 2.99335000 -2.70470400 1.21378800<br/>H 4.96122000 -1.54738000 0.21024000<br/>C -1.33327600 -0.15986300 -0.43917800<br/>C -2.18335400 0.24746900 -1.27295400<br/>C -1.69850500 -0.98867900 0.66045800<br/>C -3.72616600 -0.15203600 -1.04870700<br/>H -2.20002000 0.89047900 -2.12144700<br/>C -3.01490300 -1.38836100 0.87691500<br/>H -0.95178500 -1.28327000 1.38360400<br/>C -4.04843800 -0.98841900 0.28663000<br/>H -4.50743900 0.18526600 -1.72413000<br/>H -3.23604000 -2.01831400 1.73426200<br/>H -5.06968500 -1.30860600 0.20138500<br/>C 0.13362400 2.21863800 0.90036800<br/>O -0.11720900 1.68069000 1.91605800<br/>O 0.41931600 3.08562700 0.15546000</p> |
| 7 |                                                                                                                                                                                                                                                                                                                                                                                                                                                                                                                                                                                                                                                                                                                                                                                                                                                                                                                                      |                                                                                                                                                                                                                                                                                                                                                                                                                                                                                                                                                                                                                                                                                                                                                                                                                                                                                                                                                                                                                                                                   |                                                                                                                                                                                                                                                                                                                                                                                                                                                                                                                                                                                                                                                                                                                                                                                                                                                                                                                                                                                                                                                             |
|   | <p>-11<br/>C 0.34119000 -1.21678800 0.00027500<br/>C -1.02558800 -1.22230000 0.00028000<br/>C -1.81737100 -0.00002200 -0.00013700<br/>C -1.02572000 1.22230900 0.00014800<br/>C 0.34107200 1.21688400 0.00035200<br/>C 1.08976300 0.00008600 0.00028700<br/>H 0.87920800 -2.16057500 0.00047500<br/>H -1.55211300 -2.17287100 0.00046800<br/>H -1.55226200 2.17288100 0.00030400<br/>H 0.87898900 2.16071700 0.00054900<br/>C -3.18937300 -0.00010400 -0.00046400<br/>H -3.75237000 0.92700000 -0.00042600<br/>H -3.75235700 -0.92741300 -0.00107900<br/>C 2.49148800 0.00016600 -0.00015800<br/>N 3.65978300 -0.00016100 -0.00054200</p>                                                                                                                                                                                                                                                                                                                                                                               | <p>-11<br/>C -2.19033200 0.01224600 0.02113800<br/>C -1.57325900 1.26197000 0.18205200<br/>C -0.21848200 1.40044000 -0.08899000<br/>C 0.55691500 0.31480900 -0.52227900<br/>C -0.07587000 -0.93086000 -0.67195900<br/>C -1.42768300 -1.08740900 -0.40934600<br/>H -2.15634700 2.11293900 0.51246200<br/>H 0.24865700 2.37163100 0.03295900<br/>H 0.51180100 -1.78224100 -0.98880400<br/>H -1.90224000 -2.05307800 -0.53571800<br/>C 2.02209100 0.47562600 -0.78751000<br/>H 2.27676300 0.00177600 -1.74266900<br/>H 2.28586100 1.53111900 -0.86035000<br/>C -3.58397200 -0.14018600 0.28760100<br/>N -4.71404600 -0.26420700 0.50309100<br/>C 2.96632800 -0.20045400 0.28762500<br/>O 3.97240400 0.47149100 0.60520400<br/>O 2.63752200 -1.34271500 0.67860600</p>                                                                                                                                                                                                                                                                                                                                                                                   | <p>-11<br/>C 2.13126800 -0.00000300 -0.04204900<br/>C 1.44045700 1.21516700 0.21853000<br/>C 0.15626400 1.21733400 0.69960900<br/>C -0.57310500 0.00005100 0.96552900<br/>C 0.15626600 -1.21726100 0.69974600<br/>C 1.44045900 -1.21514600 0.21866700<br/>H 1.94729200 2.15761700 0.03585800<br/>H -0.33721800 2.16541600 0.89058700<br/>H -0.33721400 -2.16532300 0.89083100<br/>H 1.94729600 -2.15761500 0.03610000<br/>C -1.89444900 0.00007500 1.40548700<br/>H -2.35168800 -0.92353900 1.74232500<br/>H -2.35168900 0.92372700 1.74221800<br/>C 3.45244100 -0.00003000 -0.52898000<br/>N 4.54550100 -0.00005100 -0.93221900<br/>C -3.02908900 -0.00004100 -0.80489900<br/>O -3.12612900 1.15800900 -0.98770800<br/>O -3.12616600 -1.15810900 -0.98757100</p>                                                                                                                                                                                                                                                                                                                                                                                |

|    |                                                                                                                                                                                                                                                                                                                                                                                                                                                                                                                                                                                                                                                                                                                                                                                                                                                                                                                                                                                                                                                                                                                                     |                                                                                                                                                                                                                                                                                                                                                                                                                                                                                                                                                                                                                                                                                                                                                                                                                                                                                                                                                                                                                                                                                                                                                                                                                                                                    |                                                                                                                                                                                                                                                                                                                                                                                                                                                                                                                                                                                                                                                                                                                                                                                                                                                                                                                                                                                                                                                                                                                                                                                                                                                                       |
|----|-------------------------------------------------------------------------------------------------------------------------------------------------------------------------------------------------------------------------------------------------------------------------------------------------------------------------------------------------------------------------------------------------------------------------------------------------------------------------------------------------------------------------------------------------------------------------------------------------------------------------------------------------------------------------------------------------------------------------------------------------------------------------------------------------------------------------------------------------------------------------------------------------------------------------------------------------------------------------------------------------------------------------------------------------------------------------------------------------------------------------------------|--------------------------------------------------------------------------------------------------------------------------------------------------------------------------------------------------------------------------------------------------------------------------------------------------------------------------------------------------------------------------------------------------------------------------------------------------------------------------------------------------------------------------------------------------------------------------------------------------------------------------------------------------------------------------------------------------------------------------------------------------------------------------------------------------------------------------------------------------------------------------------------------------------------------------------------------------------------------------------------------------------------------------------------------------------------------------------------------------------------------------------------------------------------------------------------------------------------------------------------------------------------------|-----------------------------------------------------------------------------------------------------------------------------------------------------------------------------------------------------------------------------------------------------------------------------------------------------------------------------------------------------------------------------------------------------------------------------------------------------------------------------------------------------------------------------------------------------------------------------------------------------------------------------------------------------------------------------------------------------------------------------------------------------------------------------------------------------------------------------------------------------------------------------------------------------------------------------------------------------------------------------------------------------------------------------------------------------------------------------------------------------------------------------------------------------------------------------------------------------------------------------------------------------------------------|
| 8  | 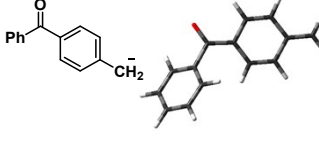                                                                                                                                                                                                                                                                                                                                                                                                                                                                                                                                                                                                                                                                                                                                                                                                                                                                                                                                                                                                                                                   |                                                                                                                                                                                                                                                                                                                                                                                                                                                                                                                                                                                                                                                                                                                                                                                                                                                                                                                                                                                                                                                                                                                                                                                  |                                                                                                                                                                                                                                                                                                                                                                                                                                                                                                                                                                                                                                                                                                                                                                                                                                                                                                                                                                                                                                                                                                                                                                                    |
|    | <p>-11</p> <p>C -2.04758300 1.32646600 -0.30136800<br/> C -3.31106600 0.82295000 -0.21883400<br/> C -3.57589900 -0.56453600 0.13631100<br/> C -2.38080600 -1.34782500 0.41010900<br/> C -1.12122700 -0.82830100 0.30975900<br/> C -0.87642800 0.53266500 -0.06511000<br/> H -1.89494700 2.36830700 -0.56391400<br/> H -4.16242900 1.46789900 -0.42228100<br/> H -2.50899300 -2.38327600 0.71497200<br/> H -0.28039600 -1.46872100 0.55210000<br/> O 0.57968800 2.38891800 -0.27861100<br/> C -4.84207900 -1.08069000 0.21316900<br/> H -5.01341700 -2.11715800 0.48370100<br/> H -5.71341800 -0.46763800 0.00896000<br/> C 0.41482700 1.15095900 -0.14554100<br/> C 1.67417600 0.31498600 -0.05948100<br/> C 2.74906400 0.80578300 0.69618900<br/> C 1.86047000 -0.87019800 -0.78435200<br/> C 3.95647400 0.11701800 0.75949300<br/> H 2.62305900 1.74081800 1.22935600<br/> C 3.07649800 -1.55263100 -0.73912700<br/> H 1.05776000 -1.25039100 -1.40477400<br/> C 4.12562500 -1.06744100 0.03973000<br/> H 4.76941200 0.50578200 1.36343400<br/> H 3.20484300 -2.46107400 -1.31782000<br/> H 5.06874500 -1.60112300 0.07946300</p> | <p>-11</p> <p>C 3.83331800 -0.88908300 -0.59408600<br/> C 4.85647500 -0.26118500 0.43588100<br/> O 5.65140100 -1.07406700 0.95904300<br/> O 4.79606400 0.97874500 0.59592400<br/> C 2.43054300 -0.37524200 -0.47383600<br/> C 2.08336700 0.91415300 -0.91475400<br/> C 1.42636700 -1.15647900 0.11338700<br/> C 0.79073500 1.39273000 -0.77794300<br/> H 2.84727400 1.53984600 -1.35892300<br/> C 0.12202400 -0.68831500 0.23789400<br/> H 1.67092800 -2.14966700 0.47566300<br/> C -0.21922400 0.59490600 -0.21312800<br/> H 0.53546900 2.39062200 -1.11403000<br/> H -0.62408400 -1.31652800 0.70821500<br/> H 3.85549100 -1.97348200 -0.47996700<br/> H 4.22837900 -0.64989900 -1.58835100<br/> C -1.57949800 1.18005600 -0.05101800<br/> C -2.78494400 0.28926600 0.04201400<br/> C -2.89706300 -0.90856100 -0.67660600<br/> C -3.87269800 0.72595600 0.81167700<br/> C -4.07142600 -1.65663200 -0.61846200<br/> H -2.07885200 -1.24488200 -1.30084800<br/> C -5.03476200 -0.03273000 0.88748100<br/> H -3.78926300 1.66305600 1.34830200<br/> C -5.13702200 -1.22617400 0.16988800<br/> H -4.15335500 -2.57413500 -1.18965600<br/> H -5.86283800 0.30571300 1.49964800<br/> H -6.04587100 -1.81481900 0.22202400<br/> O -1.73001800 2.39634500 0.00848200</p> | <p>-11</p> <p>C 3.83097500 -0.51863000 -1.21972200<br/> C 4.65132400 -0.60038500 1.05205900<br/> O 4.35379300 -1.69892300 1.36055600<br/> O 5.10904600 0.48000700 1.17054000<br/> C 2.52323500 -0.11246000 -0.95881300<br/> C 2.14635500 1.27874000 -0.88922900<br/> C 1.46099100 -1.04536400 -0.68286800<br/> C 0.87264900 1.67246500 -0.58007300<br/> H 2.90714700 2.02758400 -1.09067900<br/> C 0.18453800 -0.63708100 -0.38718300<br/> H 1.69048300 -2.10652700 -0.70439500<br/> C -0.17492500 0.73918100 -0.32943200<br/> H 0.62646700 2.72773100 -0.53098100<br/> H -0.56208100 -1.39177400 -0.16871500<br/> H 4.04058700 -1.56235300 -1.42522500<br/> H 4.55784600 0.20381300 -1.57355000<br/> C -1.48781800 1.23490900 0.02702400<br/> C -2.67021500 0.29516300 0.09479000<br/> C -2.95013900 -0.65012600 -0.90083600<br/> C -3.58326700 0.44859900 1.14753300<br/> C -4.10377300 -1.43136400 -0.83600900<br/> H -2.27552800 -0.76112500 -1.74119200<br/> C -4.72307700 -0.34556000 1.22606400<br/> H -3.38580900 1.20098700 1.90194300<br/> C -4.98812600 -1.28909100 0.23177800<br/> H -4.31214900 -2.14868300 -1.62220200<br/> H -5.40923600 -0.22559500 2.05732600<br/> H -5.88053200 -1.90254700 0.28600300<br/> O -1.70403400 2.43197800 0.29905200</p> |
| 9  |                                                                                                                                                                                                                                                                                                                                                                                                                                                                                                                                                                                                                                                                                                                                                                                                                                                                                                                                                                                                                                                    |                                                                                                                                                                                                                                                                                                                                                                                                                                                                                                                                                                                                                                                                                                                                                                                                                                                                                                                                                                                                                                                                                                                                                                                   |                                                                                                                                                                                                                                                                                                                                                                                                                                                                                                                                                                                                                                                                                                                                                                                                                                                                                                                                                                                                                                                                                                                                                                                    |
|    | <p>-11</p> <p>C -0.02897000 -1.22567100 0.00014400<br/> C -1.38991200 -1.22841300 0.00008400<br/> C -2.17410700 0.00000500 -0.00004500<br/> C -1.38990400 1.22841800 0.00022000<br/> C -0.02896000 1.22568900 0.00029400<br/> C 0.70262300 0.00000900 0.00014600<br/> H 0.52889000 -2.15285600 0.00024500<br/> H -1.92330900 -2.17431400 0.00014900<br/> H -1.92328300 2.17433000 0.00035300<br/> H 0.52889700 2.15287500 0.00047800<br/> H -3.53959300 -0.00000400 -0.00037600<br/> H -4.10264500 0.92661400 -0.00031200<br/> H -4.10259900 -0.92666600 -0.00037900<br/> O 2.71779200 1.09755200 -0.00036000<br/> O 2.71777800 -1.09757100 -0.00000600<br/> N 2.08606200 -0.00000400 -0.00005900</p>                                                                                                                                                                                                                                                                                                                                                                                                                               | <p>-11</p> <p>C -2.43422100 0.44139100 -0.81050100<br/> C -3.35778300 -0.18827200 0.31558200<br/> O -4.34377900 0.50825800 0.63858000<br/> O -3.03062300 -1.32145000 0.73113400<br/> C -0.96728700 0.30022800 -0.55921100<br/> C -0.33518700 -0.95438200 -0.63516300<br/> C -0.18692100 1.41512600 -0.21207400<br/> C 1.02017700 -1.09273300 -0.38440600<br/> H -0.92786200 -1.82452800 -0.88223600<br/> C 1.17182200 1.29714300 0.04490100<br/> H -0.65390400 2.39152700 -0.14841300<br/> C 1.76442900 0.03901200 -0.04581000<br/> H 1.50892200 -2.05474400 -0.44823400<br/> H 1.77233100 2.15658000 0.30742800<br/> H -2.70585900 1.49004700 -0.93150200<br/> H -2.70182500 -0.08524700 -1.73363200<br/> N 3.19525300 -0.09728500 0.21430400<br/> O 3.70124300 -1.21506400 0.12642200<br/> O 3.83456500 0.91104000 0.51093400</p>                                                                                                                                                                                                                                                                                                                                                                                                                                | <p>-11</p> <p>C 2.35304500 -0.00003700 1.31041900<br/> C 3.31039800 0.00002000 -0.76385600<br/> O 3.42691600 1.15441000 -1.00593500<br/> O 3.42685300 -1.15435700 -1.00602800<br/> C 1.00491500 -0.00002700 0.94415200<br/> C 0.27515100 -1.22044700 0.71503800<br/> C 0.27514300 1.22040600 0.71513400<br/> H -1.02888800 -1.22104800 0.29878000<br/> H 0.78299500 -2.16439200 0.88215100<br/> C -1.02889700 1.22103200 0.29887900<br/> H 0.78298200 2.16434200 0.88232000<br/> C -1.71003200 -0.00002000 0.79545000<br/> H -1.56139200 -2.14836300 0.13566100<br/> H -1.56140700 2.14835600 0.13583500<br/> H 2.80918900 0.92160400 1.65271200<br/> H 2.80919400 -0.92169900 1.65264900<br/> N -3.05290600 0.00001100 -0.34223500<br/> O -3.63914100 -1.09098000 -0.52746900<br/> O -3.63915900 1.09101200 -0.52734700</p>                                                                                                                                                                                                                                                                                                                                                                                                                                          |
| 10 |                                                                                                                                                                                                                                                                                                                                                                                                                                                                                                                                                                                                                                                                                                                                                                                                                                                                                                                                                                                                                                                  |                                                                                                                                                                                                                                                                                                                                                                                                                                                                                                                                                                                                                                                                                                                                                                                                                                                                                                                                                                                                                                                                                                                                                                                 |                                                                                                                                                                                                                                                                                                                                                                                                                                                                                                                                                                                                                                                                                                                                                                                                                                                                                                                                                                                                                                                                                                                                                                                  |
|    | <p>-11</p> <p>C -0.13408700 0.10379000 0.00006900<br/> C -1.17242300 -0.80542500 0.00000500<br/> H -0.99900400 -1.87610000 0.00016400<br/> H -2.20282300 -0.45627800 -0.00030500<br/> C 1.29921700 -0.46100600 -0.00002400<br/> H 1.83838500 -0.08629300 -0.87838500<br/> H 1.83848600 -0.08614900 0.87817800<br/> H 1.34870300 -1.55388800 0.00004500<br/> O -0.22249900 1.37931900 0.00000100</p>                                                                                                                                                                                                                                                                                                                                                                                                                                                                                                                                                                                                                                                                                                                                 | <p>-11</p> <p>C -1.18993500 0.31322900 0.03742400<br/> C 0.14527700 0.65504400 0.64273100<br/> H 0.17080600 0.38237100 1.70300800<br/> O 3.1845200 1.72862900 0.55476900<br/> C -1.83107000 -0.98473000 0.47704000<br/> H -2.08360300 -0.93340300 1.54153500<br/> H -2.73330800 -1.17902600 -0.10340600<br/> H -1.10728700 -1.79085500 0.34285500<br/> O -1.72277600 1.03820000 -0.78835000<br/> C 1.35296000 -0.10351100 -0.04763100<br/> O 1.06934400 -1.11768100 -0.72693500<br/> O 2.47487500 0.39349700 0.17826700</p>                                                                                                                                                                                                                                                                                                                                                                                                                                                                                                                                                                                                                                                                                                                                        | <p>-11</p> <p>C 1.30529300 -0.14320700 0.18732200<br/> O 1.74250200 -1.24155500 -0.26934200<br/> C 0.42835800 0.01507800 1.25892500<br/> H 0.16586000 -0.85149100 1.86033600<br/> H 0.21662200 0.99456400 1.66994600<br/> C 1.76614600 1.12998300 -0.54343000<br/> H 1.34188800 2.05125500 -0.13603500<br/> H 2.85912500 1.19702500 -0.49966100<br/> H 1.49774700 1.05811800 -1.60330000<br/> C -1.74913900 -0.02222500 -0.13965800<br/> O -2.04020500 1.11063400 -0.04269100<br/> O -1.77544600 -1.15998500 -0.42174600</p>                                                                                                                                                                                                                                                                                                                                                                                                                                                                                                                                                                                                                                                                                                                                          |
| 11 |                                                                                                                                                                                                                                                                                                                                                                                                                                                                                                                                                                                                                                                                                                                                                                                                                                                                                                                                                                                                                                                  |                                                                                                                                                                                                                                                                                                                                                                                                                                                                                                                                                                                                                                                                                                                                                                                                                                                                                                                                                                                                                                                                                                                                                                                 |                                                                                                                                                                                                                                                                                                                                                                                                                                                                                                                                                                                                                                                                                                                                                                                                                                                                                                                                                                                                                                                                                                                                                                                  |
|    | <p>-11</p> <p>C -0.17500300 -0.71276300 0.00030700<br/> C -1.35113600 -0.38696700 0.00026800<br/> C -1.14546000 0.27451200 0.00035100<br/> C -2.59673200 -0.13604400 -0.00001000<br/> H -3.14935600 0.24160000 -0.87884600<br/> H -2.66506200 -1.22540300 0.00051600<br/> H -3.15013700 0.24266100 0.87778600<br/> C -0.93459500 1.76749700 -0.00052900</p>                                                                                                                                                                                                                                                                                                                                                                                                                                                                                                                                                                                                                                                                                                                                                                         | <p>-11</p> <p>C -0.58458700 -0.65975500 -0.49432200<br/> C 0.72123200 -0.52681900 0.29463100<br/> H -1.74834700 0.34864200 -0.35991200<br/> H -2.19535100 0.33364000 -1.35958400<br/> C -2.80487900 -0.23556600 0.60363600<br/> H -3.71400600 0.37136700 0.57036400<br/> H -3.06801800 -1.25704200 0.31985200<br/> H -2.44874900 -0.24696000 1.63678100</p>                                                                                                                                                                                                                                                                                                                                                                                                                                                                                                                                                                                                                                                                                                                                                                                                                                                                                                        | <p>-11</p> <p>C 0.65000600 0.53340200 -0.64327700<br/> C -0.19930600 0.97568000 0.37521700<br/> C 1.75906500 -0.53906700 -0.41504000<br/> H 2.11033600 -0.71711100 -1.43682100<br/> C 2.96548500 0.00395400 0.37197300<br/> H 3.80250500 -0.70347800 0.34099400<br/> H 3.31367200 0.94746300 -0.06009700<br/> H 2.72790900 0.18826500 1.42248600</p>                                                                                                                                                                                                                                                                                                                                                                                                                                                                                                                                                                                                                                                                                                                                                                                                                                                                                                                  |

|    |                                                                                                                                                                                                                                                                                                                                                                                                                                                                                                                                                                                                                                                                                                 |                                                                                                                                                                                                                                                                                                                                                                                                                                                                                                                                                                                                                                                                                                                                                                                                                                      |                                                                                                                                                                                                                                                                                                                                                                                                                                                                                                                                                                                                                                                                                                                                                                                                                                |
|----|-------------------------------------------------------------------------------------------------------------------------------------------------------------------------------------------------------------------------------------------------------------------------------------------------------------------------------------------------------------------------------------------------------------------------------------------------------------------------------------------------------------------------------------------------------------------------------------------------------------------------------------------------------------------------------------------------|--------------------------------------------------------------------------------------------------------------------------------------------------------------------------------------------------------------------------------------------------------------------------------------------------------------------------------------------------------------------------------------------------------------------------------------------------------------------------------------------------------------------------------------------------------------------------------------------------------------------------------------------------------------------------------------------------------------------------------------------------------------------------------------------------------------------------------------|--------------------------------------------------------------------------------------------------------------------------------------------------------------------------------------------------------------------------------------------------------------------------------------------------------------------------------------------------------------------------------------------------------------------------------------------------------------------------------------------------------------------------------------------------------------------------------------------------------------------------------------------------------------------------------------------------------------------------------------------------------------------------------------------------------------------------------|
|    | <p>H 0.11186200 2.06960400 -0.00036300<br/> C -1.40116600 2.25287000 -0.87699400<br/> H -1.40178900 2.25399300 0.87494600<br/> C 1.85802600 0.30910300 1.27583600<br/> H 1.52909200 -0.23354700 2.16782800<br/> H 2.95450100 0.34138500 1.29402700<br/> H 1.49851700 1.33686600 1.36551200<br/> C 1.85797000 0.30751500 -1.27617600<br/> H 1.52970200 -0.23676000 -2.16742800<br/> H 1.49772100 1.33487300 -1.36751500<br/> H 2.95443800 0.34055500 -1.29414200<br/> O -0.42405100 -1.98335200 0.00043700<br/> H 1.79203500 -1.38899400 0.00089500</p>                                                                                                                                          | <p>C -1.42040900 1.80835400 -0.02127000<br/> H -0.72413700 2.22765400 -0.74684300<br/> H -2.34306700 2.39665700 -0.04083700<br/> H -0.98120100 1.92332600 0.97168200<br/> C 1.63125200 -1.73376300 -0.00399100<br/> H 1.84107200 -1.80784100 -1.07173300<br/> H 2.57799600 -1.61667600 0.53052100<br/> H 1.16731300 -2.67111800 0.31533300<br/> C 0.47279000 -0.45540300 1.81103300<br/> H -0.19333800 0.35929300 2.09553900<br/> H 0.04697200 -1.39128300 2.18821700<br/> H 1.42859500 -0.27847000 2.30670800<br/> C 1.48820500 0.74840100 -0.24811600<br/> O -0.77463700 -1.61164000 -1.23582300<br/> O 1.31943600 0.98143000 -1.47268000<br/> O 2.21449800 1.36682400 0.55773600</p>                                                                                                                                              | <p>C 1.28736700 -1.90097800 0.12161600<br/> O 0.48435600 -2.30459700 -0.50247100<br/> H 2.11159000 -2.62439400 1.05360000<br/> H 0.91579300 -1.85040200 1.14685200<br/> C -1.14333200 2.11400200 0.05703000<br/> H -1.36842200 2.13377600 -1.01042000<br/> H -2.08748900 2.03717800 0.61545700<br/> H -0.72081200 3.10335200 0.31487400<br/> C 0.00326400 0.75019500 1.85305600<br/> H 0.67907300 -0.07204600 2.08547500<br/> H 0.41067100 1.64527500 2.35751200<br/> H -0.94767100 0.52759400 2.35758600<br/> C -2.09482800 -0.90948400 -0.13317300<br/> O 0.59111500 0.96079000 -1.84861400<br/> O -2.15047400 -0.84718000 -1.30051700<br/> O -2.29037000 -1.17324700 0.99148200</p>                                                                                                                                         |
| 12 | 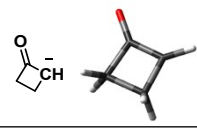                                                                                                                                                                                                                                                                                                                                                                                                                                                                                                                                                                                                               |                                                                                                                                                                                                                                                                                                                                                                                                                                                                                                                                                                                                                                                                                                                                                     |                                                                                                                                                                                                                                                                                                                                                                                                                                                                                                                                                                                                                                                                                                                                              |
|    | <p>-11<br/> C -0.44815200 -1.04342100 0.00001100<br/> C -1.50145200 0.11292700 -0.00002400<br/> H -0.46243700 -1.68698400 0.88940400<br/> H -0.46239400 -1.68699600 -0.88937400<br/> H -2.15906200 0.11433000 0.88459900<br/> H -2.15899700 0.11433900 -0.88469600<br/> C 0.64685300 0.07254800 0.00003400<br/> O 1.90474200 -0.03413800 -0.00002500<br/> C -0.31884200 1.06833900 0.00002800<br/> H -0.26548500 2.15605600 -0.00002700</p>                                                                                                                                                                                                                                                     | <p>-11<br/> C -0.79410300 -1.41586300 -0.53762400<br/> C 0.00007500 -0.09743700 -0.73803300<br/> C -1.71386700 -0.70923900 0.50453100<br/> H -1.33772900 -1.73678500 -1.42790700<br/> H -0.18474900 -2.22863900 -0.14760000<br/> O 0.14415600 0.27358800 -1.75482700<br/> H -2.79693000 -0.78505200 0.38362300<br/> H -1.45466600 -0.94517300 1.54128500<br/> C -1.08695900 0.61448100 0.05181900<br/> O -1.39775200 1.77165300 0.20755600<br/> C 1.40276300 0.00500100 0.00275300<br/> O 1.76741100 -0.99421100 0.65634000<br/> O 1.97815000 1.10261300 -0.15109700</p>                                                                                                                                                                                                                                                             | <p>-11<br/> C 1.15115500 -1.39279200 0.50897800<br/> C 0.53665100 -0.09420500 1.00607900<br/> C 1.73600400 -0.56373000 -0.68048900<br/> H 1.92716700 -1.85124300 1.14001200<br/> H 0.45383100 -2.18714600 2.08371000<br/> H 0.05002300 0.15710000 1.94585100<br/> H 2.83065400 -0.55198000 -0.74846700<br/> H 1.32940800 -0.81242400 -1.66807600<br/> C 1.11293100 0.69417600 0.00255200<br/> O 1.18607900 1.90423300 -0.31600000<br/> C -1.86182900 -0.08192000 -0.11065200<br/> O -1.80871100 -1.13630200 -0.61655500<br/> O -2.20743700 0.96666100 0.27799200</p>                                                                                                                                                                                                                                                           |
| 13 |                                                                                                                                                                                                                                                                                                                                                                                                                                                                                                                                                                                                                |                                                                                                                                                                                                                                                                                                                                                                                                                                                                                                                                                                                                                                                                                                                                                     |                                                                                                                                                                                                                                                                                                                                                                                                                                                                                                                                                                                                                                                                                                                                              |
|    | <p>-11<br/> C 1.75354200 0.04771000 0.35927500<br/> C 1.13986500 -1.27338300 -0.12390100<br/> C -0.44466800 1.24888700 0.06812900<br/> C 1.04419400 1.23271800 -0.30181000<br/> H 1.52688200 -1.47336500 -1.14207500<br/> H 1.53737000 -2.09676300 0.48866800<br/> H 1.63709600 0.12590700 1.44853600<br/> H 2.82967900 0.07334500 0.14891200<br/> H -0.99963100 1.93265800 -0.58605100<br/> H -0.3329400 1.64503600 1.08629400<br/> H 1.14979100 1.14178000 -1.39136700<br/> H 1.52309000 2.17929300 -0.02248300<br/> C -1.15698000 -0.12070200 0.00646700<br/> O -2.43999200 -0.07747900 0.06280100<br/> C -0.37251900 -1.25156300 -0.07616600<br/> H -0.89164300 -2.21006100 -0.12480900</p> | <p>-11<br/> C -1.90127000 -1.36676900 -0.23476900<br/> C -0.40797300 -1.43892500 0.10194200<br/> C 0.39524300 -0.23254700 -0.43630600<br/> C -1.76372800 1.16285800 -0.27035000<br/> C -2.52058800 -0.06272000 0.27752900<br/> H -0.26387700 -1.47651900 1.18592200<br/> H 0.02838300 -2.35883300 -0.29944100<br/> H -2.03865900 -1.43254700 -1.32162800<br/> H -2.42413300 -2.22493400 0.20012400<br/> H -2.13327200 2.09712100 0.15772200<br/> H -1.90460100 1.21164700 -1.35803500<br/> H -2.48102000 -0.04767400 1.37326500<br/> H -3.57661600 0.00494100 0.00009400<br/> H 0.33236700 -0.23727300 -1.53332100<br/> C 1.90661000 -0.27465000 -0.05133200<br/> C -0.26724400 1.07203500 -0.00889100<br/> O 2.17847900 -0.70347000 1.09714900<br/> O 2.70855600 0.12047100 -0.93164400<br/> O 0.33985500 1.99654600 0.50054100</p> | <p>-11<br/> C 2.14155500 -1.02196800 0.18969600<br/> C 0.89819300 -1.16431800 0.08123200<br/> C 0.05714600 0.09434400 1.11444500<br/> C 1.26111200 1.08345600 -0.85946400<br/> C 1.77449800 -0.33614200 -1.12925000<br/> O 0.31361000 -2.02587400 0.71915600<br/> H 1.21846200 -1.43936500 2.09699200<br/> H 2.89808600 -0.41425600 0.70411900<br/> H 2.59368200 -2.00376100 0.00593000<br/> H 0.77218500 1.50236400 -1.74719500<br/> H 2.10681100 1.75195900 -0.64359300<br/> H 0.99406600 -0.92338600 -1.62910100<br/> H 2.63328900 -0.31215000 -1.81066600<br/> H -0.60096600 0.23393100 1.97211400<br/> C -2.12398400 -0.61338300 -0.28265000<br/> C 0.26707200 1.21261600 0.31308200<br/> O -1.80547100 -1.72590300 -0.47294400<br/> O -2.72087700 0.39295600 -0.24989100<br/> O -0.29650000 2.34581100 0.44404700</p>    |
| 14 |                                                                                                                                                                                                                                                                                                                                                                                                                                                                                                                                                                                                              |                                                                                                                                                                                                                                                                                                                                                                                                                                                                                                                                                                                                                                                                                                                                                   |                                                                                                                                                                                                                                                                                                                                                                                                                                                                                                                                                                                                                                                                                                                                            |
|    | <p>-11<br/> C -1.79577200 -0.07381800 -0.00020400<br/> C -0.26788400 0.02296000 -0.00013000<br/> C 0.45916000 -1.17563000 0.00065300<br/> C 0.46518700 1.22169900 -0.00093600<br/> C 1.85334000 -1.18687900 0.00088600<br/> H -0.11264400 -2.09539700 0.00105300<br/> C 1.85848100 1.21834100 -0.00074600<br/> H -0.05156500 2.17386300 -0.00187300<br/> C 2.56354200 0.01249800 0.00021500<br/> H 2.38623200 -2.13275400 0.00156700<br/> H 2.39751700 2.16046400 -0.00139700<br/> H 3.64826700 0.01148300 0.00036800<br/> O -2.28089800 -1.25822900 -0.00163600<br/> C -2.52513200 1.09787500 0.00172900<br/> H -3.61007400 1.04394400 0.00152500<br/> H -2.07608400 2.08195200 0.00303900</p> | <p>-11<br/> C -0.61822900 1.08571900 0.35816500<br/> C 0.70412900 0.39564800 0.16705200<br/> C 1.82001600 1.17099700 -0.17868000<br/> C 0.85569700 -0.99012400 0.31840700<br/> C 3.06507000 0.57967500 -0.35735200<br/> H 1.68890200 2.23935400 -0.29962800<br/> C 2.10259600 -1.58262500 0.12686100<br/> H -0.00949900 -1.60319100 0.54260900<br/> C 3.20881900 -0.80102900 -0.20402200<br/> H 3.92322000 1.18962000 -0.61636000<br/> H 2.21059200 -2.65607500 0.23481900<br/> H 4.17886200 -1.26468800 -0.34492000<br/> O -0.74638500 2.25916500 0.02393300<br/> C -1.76520100 0.30614500 0.93974400<br/> H -1.43407100 -0.33716700 1.75474700<br/> H -2.49569800 1.02883500 1.30427200<br/> C -2.47606400 -0.58545700 -0.17341700<br/> O -3.13317500 0.05299000 -1.01920600<br/> O -2.30085400 -1.82095300 -0.07970700</p>        | <p>-11<br/> C -3.02747000 0.50969400 -0.60183300<br/> C -1.80244200 1.11071000 -0.31937600<br/> C -0.75162900 0.38887400 0.26174900<br/> C -0.96455200 -0.97134100 0.53509800<br/> C -2.18588400 -1.5791300 0.25004200<br/> C -3.22646400 -0.84077500 -0.31637300<br/> H -3.82655200 1.09343400 -1.04743800<br/> H -1.62424900 2.15478600 -0.54616300<br/> H -0.16300300 -1.56857900 0.95176000<br/> H -2.32459100 -2.63367800 0.46492900<br/> H -4.17672700 -1.31481500 -0.53704300<br/> C 0.55482100 1.12772800 0.54149900<br/> C 1.52720000 0.48515400 1.31199200<br/> H 2.39697700 1.06189800 1.61118900<br/> H 1.30323200 -0.40058700 1.89009100<br/> O 0.67638200 2.27900400 0.02842000<br/> C 2.75079100 -0.74261500 -0.48736800<br/> O 3.15337800 0.15269300 -1.13356700<br/> O 2.56632600 -1.84699200 -0.12504100</p> |
| 15 |                                                                                                                                                                                                                                                                                                                                                                                                                                                                                                                                                                                                              |                                                                                                                                                                                                                                                                                                                                                                                                                                                                                                                                                                                                                                                                                                                                                   |                                                                                                                                                                                                                                                                                                                                                                                                                                                                                                                                                                                                                                                                                                                                            |

|    |                                                                                                                                                                                                                                                                                                                                                                                                                                                                                                                                                                                                                                                                                                                                                                                                                                                                                                                                                                                                                                                                                             |                                                                                                                                                                                                                                                                                                                                                                                                                                                                                                                                                                                                                                                                                                                                                                                                                                                                                                                                                                                                                                                                                                                                                                                                                                 |                                                                                                                                                                                                                                                                                                                                                                                                                                                                                                                                                                                                                                                                                                                                                                                                                                                                                                                                                                                                                                                                                                                                                                                                                                       |
|----|---------------------------------------------------------------------------------------------------------------------------------------------------------------------------------------------------------------------------------------------------------------------------------------------------------------------------------------------------------------------------------------------------------------------------------------------------------------------------------------------------------------------------------------------------------------------------------------------------------------------------------------------------------------------------------------------------------------------------------------------------------------------------------------------------------------------------------------------------------------------------------------------------------------------------------------------------------------------------------------------------------------------------------------------------------------------------------------------|---------------------------------------------------------------------------------------------------------------------------------------------------------------------------------------------------------------------------------------------------------------------------------------------------------------------------------------------------------------------------------------------------------------------------------------------------------------------------------------------------------------------------------------------------------------------------------------------------------------------------------------------------------------------------------------------------------------------------------------------------------------------------------------------------------------------------------------------------------------------------------------------------------------------------------------------------------------------------------------------------------------------------------------------------------------------------------------------------------------------------------------------------------------------------------------------------------------------------------|---------------------------------------------------------------------------------------------------------------------------------------------------------------------------------------------------------------------------------------------------------------------------------------------------------------------------------------------------------------------------------------------------------------------------------------------------------------------------------------------------------------------------------------------------------------------------------------------------------------------------------------------------------------------------------------------------------------------------------------------------------------------------------------------------------------------------------------------------------------------------------------------------------------------------------------------------------------------------------------------------------------------------------------------------------------------------------------------------------------------------------------------------------------------------------------------------------------------------------------|
|    | <p>-11</p> <p>C -2.54124100 -0.07498200 -0.00037500</p> <p>C -1.01799000 0.02590600 -0.00014000</p> <p>C -0.29477800 -1.17747000 0.00151600</p> <p>C -0.28408100 1.22571700 -0.00220600</p> <p>C 1.09201500 -1.19912700 0.00185400</p> <p>H -0.87019300 -2.09402900 0.00247800</p> <p>H 1.10241800 1.22653000 -0.00206500</p> <p>H -0.79719300 2.17855500 -0.00436800</p> <p>C 1.80682700 0.00883400 0.00009100</p> <p>H 1.62820900 -2.14103100 0.00334800</p> <p>H 1.64858600 2.16235600 -0.00373700</p> <p>O -3.02230600 -1.25905000 -0.00381100</p> <p>C -3.26362000 1.10060800 0.00401900</p> <p>H -4.34818800 1.05282100 0.00430700</p> <p>H -2.80981500 2.08181000 0.00759300</p> <p>C 3.23286500 0.00345900 0.00025600</p> <p>N 4.39036400 -0.00075600 0.00045200</p>                                                                                                                                                                                                                                                                                                                | <p>-11</p> <p>C 2.41854800 1.19444700 -0.01011400</p> <p>C 1.04051600 1.33681800 -0.00464000</p> <p>C 0.20099800 0.21481900 0.01012600</p> <p>C 0.77159900 -1.06390400 0.02026600</p> <p>C 2.15169800 -1.22306900 0.01470400</p> <p>H 3.06232500 2.06466400 -0.02164800</p> <p>H 0.58946700 2.32051600 -0.01201200</p> <p>H 0.14430700 -1.94509500 0.03180900</p> <p>H 2.58889900 -2.21323000 0.02176600</p> <p>C -1.29441000 0.44360100 0.01452800</p> <p>C -2.20999200 -0.76071900 0.04740700</p> <p>H -1.95276300 -1.40806200 -0.79788100</p> <p>H -1.99427500 -1.32059900 0.96463800</p> <p>O -1.71729400 1.58614400 -0.00508500</p> <p>C -3.72018700 -0.38412300 -0.00953900</p> <p>O -4.21424100 -0.29240800 -1.15808200</p> <p>O -4.28498900 -0.21323100 1.09617000</p> <p>C 2.97994600 -0.09247200 -0.00083400</p> <p>C 4.40165200 -0.25006000 -0.00776000</p> <p>N 5.55028900 -0.37632300 -0.01365100</p>                                                                                                                                                                                                                                                                                                              | <p>-11</p> <p>C 2.27487900 1.14483700 -0.38121500</p> <p>C 0.94859900 1.51721600 -0.22079000</p> <p>C -0.00639900 0.62633400 0.28931100</p> <p>C 0.40757100 -0.67570400 0.61265600</p> <p>C 1.72802600 -1.07015500 0.44949500</p> <p>H 3.00233700 1.84882000 -0.76733700</p> <p>H 0.61369300 2.51039900 -0.49101800</p> <p>H -0.31418000 -1.39831300 0.96988400</p> <p>H 2.03206600 -2.08049900 0.69514700</p> <p>C -1.43722500 1.13064700 0.43792700</p> <p>C -2.31998400 0.37061000 1.21376600</p> <p>H -1.96233000 -0.40528000 1.87650400</p> <p>H -3.28579300 0.80729200 1.44568200</p> <p>O -1.72570000 2.19790000 -0.17149600</p> <p>C -3.20925900 -1.10819700 -0.47308700</p> <p>O -2.77056400 -2.14483600 -0.11842600</p> <p>O -3.83529100 -0.36053700 -1.13408100</p> <p>C 2.67553800 -0.15775100 -0.04397400</p> <p>C 4.03649200 -0.55631200 -0.20872300</p> <p>N 5.13960200 -0.87882700 -0.34130000</p>                                                                                                                                                                                                                                                                                                                    |
| 16 | 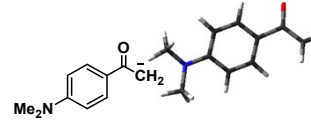                                                                                                                                                                                                                                                                                                                                                                                                                                                                                                                                                                                                                                                                                                                                                                                                                                                                                                                                                                                                           |                                                                                                                                                                                                                                                                                                                                                                                                                                                                                                                                                                                                                                                                                                                                                                                                                                                                                                                                                                                                                                                                                                                                                |                                                                                                                                                                                                                                                                                                                                                                                                                                                                                                                                                                                                                                                                                                                                                                                                                                                                                                                                                                                                                                                                                                                                                    |
|    | <p>-11</p> <p>C -3.06745800 -0.06538800 -0.01619100</p> <p>C -1.54506200 0.01826600 0.01822000</p> <p>C -0.80693800 -1.17016300 -0.02101200</p> <p>C -0.79920300 1.20278200 0.10200200</p> <p>C 0.58403400 -1.19281800 0.00194200</p> <p>H -1.36568500 -2.09761600 -0.07180600</p> <p>C 0.59149100 1.20647000 0.13381100</p> <p>H -1.30981100 2.15783800 0.15744700</p> <p>C 1.33026700 0.00186100 0.09310000</p> <p>H 1.08745800 -2.14929900 -0.04664100</p> <p>H 1.10248600 2.15781200 0.19851700</p> <p>O -3.56925200 -1.23090600 0.16209300</p> <p>C -3.78191400 1.09476800 -0.24799900</p> <p>H -4.86711300 1.05343300 -0.28050400</p> <p>H -3.31104500 2.04960900 -0.44378900</p> <p>N 2.72296900 -0.00517400 0.16762300</p> <p>C 3.44358200 1.24191800 -0.04657600</p> <p>H 4.51009700 1.05997600 0.08124600</p> <p>H 3.28265200 1.66554300 -1.04993500</p> <p>H 3.15060700 1.99524900 0.68846200</p> <p>C 3.43512600 -1.22840200 -0.17380100</p> <p>H 4.50278500 -1.06838800 -0.02768100</p> <p>H 3.13526200 -2.05143900 0.47918700</p> <p>H 3.27199800 -1.54500600 -1.21557100</p> | <p>-11</p> <p>C -1.99999400 1.06436100 -0.37059400</p> <p>C -0.57597000 0.66300500 -0.24728700</p> <p>C 0.38831100 1.63490900 0.06820200</p> <p>C -0.12846900 -0.65641400 -0.43116300</p> <p>C 1.73023200 1.32557900 0.17852300</p> <p>H 0.05683900 2.65524000 0.22193400</p> <p>C 1.21101200 -0.98915300 -0.31322900</p> <p>H -0.85039100 -1.44174100 -0.62516900</p> <p>C 2.18846100 -0.00519000 -0.01483100</p> <p>H 2.43162800 2.11342000 0.41535000</p> <p>H 1.50430600 -2.02059300 -0.45079200</p> <p>O -2.35970800 2.19959000 -0.06052600</p> <p>C -3.00198800 0.05398300 -0.87880600</p> <p>H -3.87754000 0.61328100 -1.21053700</p> <p>H -2.59357100 -0.52329300 -1.70856900</p> <p>C -3.45859200 -0.93725800 0.27031100</p> <p>O -3.03107900 -2.11243300 0.18900300</p> <p>O -4.19992500 -0.43639700 1.14188900</p> <p>N 3.51724900 -0.32285300 0.08410700</p> <p>C 4.49836900 0.70338600 0.41250800</p> <p>H 4.31167200 1.14761200 1.39717800</p> <p>H 5.48923500 0.25506600 0.42685100</p> <p>H 4.50305700 1.50961300 -0.32918700</p> <p>C 3.95986200 -1.70040500 -0.08820400</p> <p>H 3.70124200 -2.08653400 -1.08028000</p> <p>H 5.04170100 -1.74153100 0.01701200</p> <p>H 3.51937000 -2.36746800 0.66195400</p> | <p>-11</p> <p>C -1.72342700 -1.28179900 0.29275200</p> <p>C -0.37906200 -1.59668800 0.13235900</p> <p>C 0.54561800 -0.69952800 -0.41459900</p> <p>C 0.04708600 0.55898800 -0.78041400</p> <p>C -1.29256700 0.89831500 -0.62792000</p> <p>C -2.22790200 -0.02225000 -0.10073300</p> <p>H -2.38140000 -2.02209200 0.72779100</p> <p>H -0.00758200 -2.56580500 0.44429100</p> <p>H 0.72105200 1.31227300 -1.17100700</p> <p>H -1.60863700 1.89166800 -0.91646900</p> <p>C 1.99609000 -1.13774400 -0.50061000</p> <p>C 2.88368200 -0.30804400 -1.23906600</p> <p>H 3.88482900 -0.68201400 -1.43152700</p> <p>H 2.54108900 0.51770700 -1.84776200</p> <p>O 2.31169100 -2.23872700 -0.00053600</p> <p>C 3.65026600 1.21007400 0.68912100</p> <p>O 4.21602100 0.42408000 1.35074300</p> <p>O 3.20915100 2.22445300 0.29542600</p> <p>N -3.57768100 0.29309100 0.12199300</p> <p>C -3.99759700 1.67749800 -0.15142300</p> <p>H -3.71818900 2.05688900 -1.13735900</p> <p>H -5.08312300 1.72849700 -0.07729700</p> <p>H -3.56740200 2.35001700 0.60605300</p> <p>C -4.43557000 -0.55880000 0.82460000</p> <p>H -4.13334000 -0.58763300 1.88235300</p> <p>H -5.45733500 -0.18545200 0.77042800</p> <p>H -4.444080900 -1.58426700 0.44713700</p> |
| 17 |                                                                                                                                                                                                                                                                                                                                                                                                                                                                                                                                                                                                                                                                                                                                                                                                                                                                                                                                                                                                          |                                                                                                                                                                                                                                                                                                                                                                                                                                                                                                                                                                                                                                                                                                                                                                                                                                                                                                                                                                                                                                                                                                                                              |                                                                                                                                                                                                                                                                                                                                                                                                                                                                                                                                                                                                                                                                                                                                                                                                                                                                                                                                                                                                                                                                                                                                                  |
|    | <p>-11</p> <p>C 0.99252100 0.40730200 -0.07496300</p> <p>O 1.33270300 1.59922300 -0.28052200</p> <p>C -0.49538100 0.09851800 -0.02673400</p> <p>C -1.03659900 -1.19033300 -0.13919100</p> <p>C -1.38052200 1.17558300 0.11256600</p> <p>C -2.41494400 -1.39367900 -0.10119400</p> <p>H -0.38481700 -2.04415200 0.27913800</p> <p>C -2.75785300 0.97662600 0.15811900</p> <p>H -0.95717200 2.17020300 0.17812200</p> <p>C -3.28209100 -0.31169400 0.05219300</p> <p>H -2.81275200 -2.39823400 -0.19713700</p> <p>H -3.42316300 1.82574200 0.27345000</p> <p>H -4.35428600 -0.47121600 0.08261500</p> <p>C 1.89004100 -0.66018900 0.13392700</p> <p>H 1.54790700 -1.65975600 0.36112300</p> <p>C 3.27117300 -0.45597500 0.10163100</p> <p>N 4.42874300 -0.29904400 0.07528800</p>                                                                                                                                                                                                                                                                                                             | <p>-11</p> <p>C -3.44475700 0.76683400 -0.34124500</p> <p>C -2.11414900 1.12515100 -0.52078400</p> <p>C -1.08217600 0.32201400 -0.01348300</p> <p>C -1.41292400 -0.85568600 0.67012100</p> <p>C -2.74581800 -1.21712100 0.84530200</p> <p>C -3.76371900 -0.40654300 0.34398700</p> <p>H -4.23308400 1.39902000 -0.73339500</p> <p>H -1.85048500 2.03118400 -1.05159400</p> <p>H -0.63748300 -1.51038100 1.04318700</p> <p>H -2.98972800 -2.13341600 1.37021400</p> <p>H -4.80090000 -0.68890600 0.48478400</p> <p>C 0.32526000 0.78302800 -0.22755900</p> <p>C 1.46231400 0.04752200 0.46856400</p> <p>H 1.13266300 -0.40702500 1.40544200</p> <p>O 0.56786100 1.73886800 -0.94649200</p> <p>C 1.98508700 -1.22413400 -0.44303100</p> <p>O 3.15075300 -1.56141300 -0.21298700</p> <p>O 1.12200300 -1.67975000 -1.20544400</p> <p>C 2.55806400 0.94697700 0.77065200</p> <p>N 3.43585600 1.65708900 1.01222900</p>                                                                                                                                                                                                                                                                                                               | <p>-11</p> <p>C -3.40495100 -0.84043600 0.38676500</p> <p>C -2.07003400 -1.22602600 0.44859200</p> <p>C -1.05823100 -0.39407900 -0.04946900</p> <p>C -1.41450400 0.84505900 -0.60011200</p> <p>C -2.75090000 1.23610500 -0.65281000</p> <p>C -3.74971900 0.39377000 -0.16578700</p> <p>H -4.17660100 -1.49921600 0.76926500</p> <p>H -1.78499000 -2.17656400 0.88186400</p> <p>H -0.65036800 1.52282200 -0.95807400</p> <p>H -3.01193400 2.20115400 -1.07247300</p> <p>H -4.78922400 0.69837800 -0.21330900</p> <p>C 0.36554000 -0.88643300 0.04309800</p> <p>C 1.39261000 -0.16203500 -0.69613600</p> <p>H 1.07691000 0.41721200 -1.55495900</p> <p>O 0.62442400 -1.86068500 0.75693400</p> <p>C 1.90451000 1.38720900 0.60067700</p> <p>O 1.54490700 2.39537100 0.06164200</p> <p>O 2.43581700 0.89422400 1.55157000</p> <p>C 2.61970400 -0.84732800 -0.89454400</p> <p>N 3.64155200 -1.37570100 -1.04787600</p>                                                                                                                                                                                                                                                                                                                    |
| 18 |                                                                                                                                                                                                                                                                                                                                                                                                                                                                                                                                                                                                                                                                                                                                                                                                                                                                                                                                                                                                          |                                                                                                                                                                                                                                                                                                                                                                                                                                                                                                                                                                                                                                                                                                                                                                                                                                                                                                                                                                                                                                                                                                                                              |                                                                                                                                                                                                                                                                                                                                                                                                                                                                                                                                                                                                                                                                                                                                                                                                                                                                                                                                                                                                                                                                                                                                                  |



|                                                                                               |                                                                                                                                                                                                                                                                                                                                                                                                                                                                                                                                                                                                                                                                                                                                                                                                                                                                                                                                                                                                                                                                                                                                  |                                                                                                                                                                                                                                                                                                                                                                                                                                                                                                                                                                                                                                                                                                                                                                                                                                                                                                                                                                                                                                                                                                                                                                                                                                                              |                                                                                                                                                                                                                                                                                                                                                                                                                                                                                                                                                                                                                                                                                                                                                                                                                                                                                                                                                                                                                                                                                                                                                                                                                                                                      |
|-----------------------------------------------------------------------------------------------|----------------------------------------------------------------------------------------------------------------------------------------------------------------------------------------------------------------------------------------------------------------------------------------------------------------------------------------------------------------------------------------------------------------------------------------------------------------------------------------------------------------------------------------------------------------------------------------------------------------------------------------------------------------------------------------------------------------------------------------------------------------------------------------------------------------------------------------------------------------------------------------------------------------------------------------------------------------------------------------------------------------------------------------------------------------------------------------------------------------------------------|--------------------------------------------------------------------------------------------------------------------------------------------------------------------------------------------------------------------------------------------------------------------------------------------------------------------------------------------------------------------------------------------------------------------------------------------------------------------------------------------------------------------------------------------------------------------------------------------------------------------------------------------------------------------------------------------------------------------------------------------------------------------------------------------------------------------------------------------------------------------------------------------------------------------------------------------------------------------------------------------------------------------------------------------------------------------------------------------------------------------------------------------------------------------------------------------------------------------------------------------------------------|----------------------------------------------------------------------------------------------------------------------------------------------------------------------------------------------------------------------------------------------------------------------------------------------------------------------------------------------------------------------------------------------------------------------------------------------------------------------------------------------------------------------------------------------------------------------------------------------------------------------------------------------------------------------------------------------------------------------------------------------------------------------------------------------------------------------------------------------------------------------------------------------------------------------------------------------------------------------------------------------------------------------------------------------------------------------------------------------------------------------------------------------------------------------------------------------------------------------------------------------------------------------|
|                                                                                               | <p>-11</p> <p>C 0.47786200 -0.56921800 -0.07422900<br/> O 0.26958100 -1.81723000 -0.20253700<br/> C 1.93760700 -0.13517100 -0.03017600<br/> C 2.38919700 1.16715400 -0.29923800<br/> C 2.90289100 -1.11014300 0.26209600<br/> C 3.74603100 1.48299600 -0.25759600<br/> H 1.67910800 1.94038700 -0.56702000<br/> C 4.25930800 -0.79800200 0.31312600<br/> H 2.55588200 -2.12073400 0.43941200<br/> C 4.68985400 0.50352200 0.05473500<br/> H 4.86817900 2.49553200 -0.47783600<br/> H 4.98277800 -1.57119800 0.55109500<br/> H 5.74548000 0.75019900 0.08708900<br/> C -0.49547100 0.42768500 0.05938800<br/> H -0.15716100 1.44535800 0.21766700<br/> C -1.92723800 0.25531900 0.04271800<br/> C -2.77422500 1.38441300 0.21048200<br/> C -2.58171000 -0.99369600 -0.13873000<br/> C -4.15872200 1.27844100 0.19824500<br/> H -2.31732100 2.36033800 0.35205800<br/> C -3.96988700 -1.08962400 -0.15062200<br/> H -1.96161500 -1.86969900 -0.26712900<br/> C -4.77862700 0.03748300 0.01659200<br/> H -4.76328900 2.17105500 0.33080400<br/> H -4.43016500 -2.06363900 -0.29293700<br/> H -5.85974800 -0.04644900 0.00635100</p> | <p>-11</p> <p>C -4.16708400 1.45791300 0.23937000<br/> C -2.81456000 1.45586600 0.55914100<br/> C -1.96744100 0.44367200 0.08501100<br/> C -2.50849500 -0.57857400 -0.70867800<br/> C -3.86749500 -0.58168000 -1.01754300<br/> C -4.69738500 0.43715400 -0.55199000<br/> H -4.80912700 2.25120300 0.60533400<br/> H -2.38919100 2.23630200 1.17776700<br/> H -1.87904000 -1.39062900 -1.05185800<br/> H -4.27855200 -1.38160700 -1.62297400<br/> H -5.75254400 0.43539900 -0.80158800<br/> C -0.50951300 0.50913900 0.46007100<br/> C 0.44651300 -0.44260000 -0.23456100<br/> H 0.10708800 -0.59064100 -1.25816000<br/> O -0.14150700 1.30671600 1.30944500<br/> C 0.32417500 -1.88900000 0.47731900<br/> O -0.04609200 -2.81167000 -0.27677500<br/> O 0.61205900 -1.92221400 1.68834300<br/> C 1.87557900 0.04525400 -0.27510000<br/> C 2.47408500 0.31844100 -1.51201800<br/> C 2.64163400 0.22640600 0.88558500<br/> C 3.79457700 0.76049500 -1.59432300<br/> H 1.89817300 0.18435700 -2.42249100<br/> C 3.96012800 0.66899500 0.80534200<br/> H 2.19408600 -0.00598800 1.84063100<br/> C 4.54381400 0.94008000 -0.43321800<br/> H 4.23486400 0.96398100 -2.56463900<br/> H 4.53678500 0.80125700 1.71499500<br/> H 5.57057900 1.28435800 -0.49156700</p> | <p>-11</p> <p>C 4.30727900 -1.27294100 -0.08930600<br/> C 2.95516800 -1.43830600 0.19768300<br/> C 2.02095800 -0.43643500 -0.10048800<br/> C 2.48973300 0.75239500 -0.68068600<br/> C 3.84440300 0.92490600 -0.95907000<br/> C 4.75888700 -0.08832600 -0.67109900<br/> H 5.00981100 -2.06630500 0.14282000<br/> H 2.59259500 -2.34674300 0.66223800<br/> H 1.80330100 1.56267600 -0.88944000<br/> H 4.18706400 1.85552000 -1.39862700<br/> H 5.81174500 0.04650300 -0.89309400<br/> C 0.56270100 -0.70851700 0.23979600<br/> C -0.42776900 0.15341300 -0.32565100<br/> H -0.08892100 0.78795800 -1.13456200<br/> O 0.32659000 -1.66386000 1.01168100<br/> C -0.38418600 1.75147600 1.21873600<br/> O -0.06075500 2.72210900 0.60579900<br/> O -0.72037100 1.23851400 2.23723300<br/> C -1.85838000 -0.15067100 -0.38929000<br/> C -2.65943600 0.53237800 -1.33343900<br/> C -2.51590200 -1.07271200 0.45586100<br/> C -4.02781600 0.30911700 -1.43360100<br/> H -2.18698600 1.24971500 -1.99830700<br/> C -3.88712000 -1.29539300 0.34875800<br/> H -1.92526900 -1.61316400 1.18052000<br/> C -4.65782900 -0.61041400 -0.59129600<br/> H -4.60637400 0.85257200 -2.17408400<br/> H -4.36000300 -2.01429200 1.01121000<br/> H -5.72481200 -0.78835100 -0.66783800</p> |
| <p>19</p> 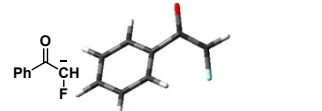   |                                                                                                                                                                                                                                                                                                                                                                                                                                                                                                                                                                                                                                                                                                                                                                                                                                                                                                                                                                                                                                                |                                                                                                                                                                                                                                                                                                                                                                                                                                                                                                                                                                                                                                                                                                                                                                                                                                                                                                                                                                                                                                                                                                                                                                           |                                                                                                                                                                                                                                                                                                                                                                                                                                                                                                                                                                                                                                                                                                                                                                                                                                                                                                                                                                                                                                                                                                                                                                                                                                                                      |
|                                                                                               | <p>-11</p> <p>C 1.41512800 0.68313500 0.02427900<br/> C -0.03177900 0.22100700 0.01208300<br/> C -1.00615900 1.23069400 -0.04233300<br/> C -0.48132800 -1.11122900 0.06065200<br/> C -2.36655800 0.93458700 -0.05599500<br/> H -0.64922600 2.25291700 -0.06951500<br/> H -1.84340500 -1.40975800 0.05055000<br/> H 0.23532800 -1.91757600 0.10844500<br/> C -2.79586500 -0.39180600 -0.01018800<br/> H -3.09390600 1.73919900 -0.10121900<br/> H -2.16212400 -2.44659300 0.09130600<br/> H -1.85422200 -0.62948700 -0.01916500<br/> O 1.62529700 1.95349700 0.06379500<br/> C 2.45919600 -0.20634300 -0.01339500<br/> F 2.32527600 -1.60223200 -0.07341500<br/> H 3.49891900 0.09193700 -0.01339100</p>                                                                                                                                                                                                                                                                                                                                                                                                                          | <p>-11</p> <p>C 3.19074000 1.02632900 0.51933400<br/> C 1.83078800 1.24813800 0.34057600<br/> O 0.99640700 0.22982300 -0.14461700<br/> C 1.55962500 -1.01274900 -0.47003900<br/> C 2.92687900 -1.22568600 -0.31158400<br/> C 3.74283000 -0.21286900 0.19012200<br/> H 3.82164200 1.81700400 0.90890800<br/> H 1.39330800 2.21124900 0.57279700<br/> H 0.93550400 -1.80954200 -0.84831800<br/> H 3.35442600 -2.18579500 -0.57676100<br/> H 4.80468100 -0.38696300 0.32261000<br/> C -0.44656000 0.57311200 -0.37613800<br/> C -1.51038300 -0.52614000 -0.42212100<br/> H -1.66894500 -0.81427600 -1.46443500<br/> O -0.77713600 1.73531200 -0.53815000<br/> C -2.88171100 -0.04319800 0.18120400<br/> C -3.62480500 0.52470200 -0.64476200<br/> O -3.05339900 -0.27822800 1.39220800<br/> F -1.05000700 -1.66961400 0.26277200</p>                                                                                                                                                                                                                                                                                                                                                                                                                            | <p>-11</p> <p>C -3.21270600 0.66305900 -0.46481400<br/> C -1.96595000 1.18799800 -0.13595900<br/> C -0.88788600 0.35528400 0.19840300<br/> C -1.09580900 -1.03347900 0.16905900<br/> C -2.34052700 -1.56155700 -0.17154000<br/> C -3.40704500 -0.71843100 -0.48428500<br/> H -4.03242900 1.33026400 -0.71081600<br/> H -1.79073700 2.25685300 -0.13778500<br/> H -0.27973200 -1.70094100 0.40552200<br/> H -2.47614300 -2.63790800 -0.19734000<br/> H -4.37478800 -1.13304800 -0.74506700<br/> C 0.42827400 1.03497600 0.52445400<br/> C 1.44777200 0.34372000 1.16739200<br/> H 2.31614500 0.84978500 1.56595900<br/> O 0.57760300 2.24343600 0.15447900<br/> C 2.70948800 -0.43533000 -0.92261900<br/> O 3.02211300 0.59721900 -1.37938600<br/> O 2.57792800 -1.58303200 -0.71286900<br/> F 1.24031900 -0.89371300 1.78995100</p>                                                                                                                                                                                                                                                                                                                                                                                                                                  |
| <p>20</p>  |                                                                                                                                                                                                                                                                                                                                                                                                                                                                                                                                                                                                                                                                                                                                                                                                                                                                                                                                                                                                                                              |                                                                                                                                                                                                                                                                                                                                                                                                                                                                                                                                                                                                                                                                                                                                                                                                                                                                                                                                                                                                                                                                                                                                                                         |                                                                                                                                                                                                                                                                                                                                                                                                                                                                                                                                                                                                                                                                                                                                                                                                                                                                                                                                                                                                                                                                                                                                                                                                                                                                      |
|                                                                                               | <p>-11</p> <p>C -1.28241700 0.35346800 0.06269400<br/> O -1.62455400 1.58102600 0.24451400<br/> C 0.21532100 0.07611100 0.02445300<br/> C 0.80131400 -1.19786600 0.12803900<br/> C 1.08191700 1.17299800 -0.09695000<br/> C 2.18381200 -1.36520100 0.09077600<br/> H 0.17256100 -2.07058200 0.26009100<br/> C 2.46605600 1.01213800 -0.13898000<br/> C 0.62734500 2.15469700 -0.14893600<br/> C 3.02807600 -0.26054400 -0.04745500<br/> H 2.60613100 -2.36136200 0.17852600<br/> H 3.10787100 1.88209100 -0.23965300<br/> H 4.10448300 -0.39193800 -0.07399600<br/> C -3.63824000 -0.53629400 -0.11491400<br/> H -4.11131600 -0.77716900 -1.08012400<br/> H -4.14449600 -1.16658800 0.63220900<br/> H -3.87762000 0.50526700 0.11406600<br/> C -2.14488200 -0.70840400 -0.12147000<br/> H -1.75426600 -1.70108100 -0.31544800</p>                                                                                                                                                                                                                                                                                                | <p>-11</p> <p>C 0.91264400 -0.37074200 -0.04983000<br/> C 1.97487100 -1.21468300 0.30596600<br/> C 3.28362900 -0.74649400 0.30731300<br/> C 3.54884400 0.58076000 -0.03614300<br/> C 2.49889500 1.43197700 -0.37811100<br/> C 1.18708600 0.96112400 -0.39267400<br/> H 1.75178800 -2.23957000 0.57561900<br/> H 4.09707600 -1.41145200 0.57520500<br/> H 4.56880200 0.94894900 -0.03454600<br/> H 2.70151800 2.46607500 -0.63379200<br/> H 0.36944000 1.63308500 -0.62537900<br/> C -0.48089200 -0.94142300 -0.04876600<br/> C -1.60562800 -0.14270200 -0.66862200<br/> H -1.22055000 0.40166500 -1.53196000<br/> C -2.77136000 -1.04264800 -1.08216900<br/> H -3.18923700 -1.53580200 -0.20567200<br/> H -3.56012700 -0.44841600 -1.55175200<br/> H -2.45264200 -1.80996100 -1.79402900<br/> C -2.09866000 0.96628600 0.37685100<br/> O -0.67928900 -2.04317300 0.44944300<br/> O -2.77131800 0.53536900 1.33494400<br/> O -1.76972400 2.14614200 0.11854100</p>                                                                                                                                                                                                                                                                                            | <p>-11</p> <p>C -0.89170200 -0.42233500 0.12871600<br/> C -1.88443600 -1.09907200 -0.59450500<br/> C -3.19265500 -0.62322500 -0.56533000<br/> C -3.54250400 0.55360400 0.00270300<br/> C -2.56570500 1.24615100 0.72129100<br/> C -1.25966700 0.76496100 0.78329100<br/> H -1.59173400 -2.00738600 -1.10658900<br/> H -3.93982900 -1.17053400 -1.22412100<br/> H -4.55882400 0.92970100 -0.04333400<br/> H -2.82241300 2.16834300 1.23266700<br/> H -0.51756600 1.33351200 1.32857500<br/> C 0.50438700 -1.03093800 0.15304600<br/> C 1.48422900 -0.46424800 0.97035700<br/> H 1.20790300 0.28179300 1.70444200<br/> C 2.80937000 -1.15760700 1.14559300<br/> H 3.24824600 -1.41090800 0.17515100<br/> H 3.52733500 -0.53019100 1.68402400<br/> H 2.72936900 -2.10645600 1.70085200<br/> C 2.15032400 1.36087000 -0.66863700<br/> O 0.70054000 -2.04541000 -0.58961500<br/> O 2.81825900 0.72752300 -1.39860800<br/> O 1.61215900 2.28578100 -0.18102300</p>                                                                                                                                                                                                                                                                                                         |

|       |                                                                                                                                                                                                                                                                                                                                                                                                                                                                                                                                                                                                                                                                                                                                                                                                                                                                                                                                                                                                                                                                                                                                                                                                                                                              |                                                                                                                                                                                                                                                                                                                                                                                                                                                                                                                                                                                                                                                                                                                                                                                                                                                                                                                                                                                                                                                                                                                                                                                                                                                                                                                                                                                                    |                                                                                                                                                                                                                                                                                                                                                                                                                                                                                                                                                                                                                                                                                                                                                                                                                                                                                                                                                                                                                                                                                                                                                                                                                                                                                                                                                                                               |
|-------|--------------------------------------------------------------------------------------------------------------------------------------------------------------------------------------------------------------------------------------------------------------------------------------------------------------------------------------------------------------------------------------------------------------------------------------------------------------------------------------------------------------------------------------------------------------------------------------------------------------------------------------------------------------------------------------------------------------------------------------------------------------------------------------------------------------------------------------------------------------------------------------------------------------------------------------------------------------------------------------------------------------------------------------------------------------------------------------------------------------------------------------------------------------------------------------------------------------------------------------------------------------|----------------------------------------------------------------------------------------------------------------------------------------------------------------------------------------------------------------------------------------------------------------------------------------------------------------------------------------------------------------------------------------------------------------------------------------------------------------------------------------------------------------------------------------------------------------------------------------------------------------------------------------------------------------------------------------------------------------------------------------------------------------------------------------------------------------------------------------------------------------------------------------------------------------------------------------------------------------------------------------------------------------------------------------------------------------------------------------------------------------------------------------------------------------------------------------------------------------------------------------------------------------------------------------------------------------------------------------------------------------------------------------------------|-----------------------------------------------------------------------------------------------------------------------------------------------------------------------------------------------------------------------------------------------------------------------------------------------------------------------------------------------------------------------------------------------------------------------------------------------------------------------------------------------------------------------------------------------------------------------------------------------------------------------------------------------------------------------------------------------------------------------------------------------------------------------------------------------------------------------------------------------------------------------------------------------------------------------------------------------------------------------------------------------------------------------------------------------------------------------------------------------------------------------------------------------------------------------------------------------------------------------------------------------------------------------------------------------------------------------------------------------------------------------------------------------|
| 21    | 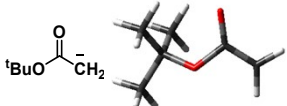                                                                                                                                                                                                                                                                                                                                                                                                                                                                                                                                                                                                                                                                                                                                                                                                                                                                                                                                                                                                                                                                                                                                                                            |                                                                                                                                                                                                                                                                                                                                                                                                                                                                                                                                                                                                                                                                                                                                                                                                                                                                                                                                                                                                                                                                                                                                                                                                                                                                                                                   |                                                                                                                                                                                                                                                                                                                                                                                                                                                                                                                                                                                                                                                                                                                                                                                                                                                                                                                                                                                                                                                                                                                                                                                                                                                                                                            |
|       | <p>-11</p> <p>C 1.54183900 0.00410200 -0.00141600<br/> O 0.30516700 -0.72465700 -0.00579900<br/> O 1.51358500 1.25938200 0.00023800<br/> C -0.97534600 -0.06052700 0.00009500<br/> C -1.16493500 0.78161200 1.27227000<br/> H -0.44503400 1.59737100 1.28859400<br/> H -2.18016900 1.18911200 1.31513400<br/> H -1.01083500 0.15827500 2.15849600<br/> C -1.97793500 -1.22234300 -0.00177200<br/> H -3.00576400 -0.84822800 0.00182200<br/> H -1.83795700 -1.84444700 -0.88989300<br/> H -1.83396400 -1.85059300 0.88137400<br/> C -1.17109900 0.79104700 -1.26486800<br/> H -1.02185000 0.17397300 -2.15631200<br/> H -2.18631500 1.19938900 -1.29958500<br/> H -0.45075700 1.60646900 -1.27917100<br/> C 2.62888100 -0.84610400 -0.00013000<br/> H 2.50768600 -1.92144700 -0.00203800<br/> H 3.62651600 -0.42438800 0.00097900</p>                                                                                                                                                                                                                                                                                                                                                                                                                         | <p>-11</p> <p>C -0.33970900 -0.82934200 0.08756400<br/> O -0.06431200 -1.62538400 -0.78791500<br/> C -1.69137400 -0.70597800 0.72718000<br/> H -1.59984900 -0.38450400 1.76627300<br/> H -2.18027600 -1.68158900 0.70545000<br/> O 0.52380000 0.07182100 0.59898200<br/> C 1.89397900 0.24751800 0.07259600<br/> C -2.62543600 0.32629000 -0.02089400<br/> O -2.13046500 0.93600400 -0.99574400<br/> O -3.77573500 0.41692200 0.45674200<br/> C 2.70904700 -1.03107300 0.28472700<br/> H 2.33026600 -1.84588200 -0.32958300<br/> H 3.75333100 -0.84509200 0.01977000<br/> H 2.67342900 -1.33262400 1.33486200<br/> C 2.44007100 1.38371400 0.93813200<br/> H 2.43765400 1.09806000 1.99260800<br/> H 3.46553700 1.62025500 0.64491100<br/> H 1.82912200 2.28164600 0.82094000<br/> C 1.84063300 0.66808700 -1.39813600<br/> H 1.44268600 -0.13129300 -2.02081500<br/> H 1.21060200 1.55267900 -1.51506900<br/> H 2.84792100 0.91611000 -1.74286200</p>                                                                                                                                                                                                                                                                                                                                                                                                                                             | <p>-11</p> <p>C -0.16664000 1.10414100 -0.18295400<br/> O 0.14983100 1.66152800 0.88872600<br/> C -1.33143500 1.25283200 -0.92785600<br/> H -1.42272900 0.79325400 -1.90264300<br/> H -1.99960000 2.06705200 -0.67283900<br/> O 0.71337300 0.15426600 -0.77100300<br/> C 1.86916100 -0.35591200 -0.06513000<br/> C -3.01306900 -0.55527400 0.17678100<br/> O -2.55646300 -0.63392500 1.25008300<br/> O -3.66608600 -0.66850500 -0.78667000<br/> C 2.91062600 0.74929700 0.16882600<br/> H 2.50846100 1.50531400 0.83973900<br/> H 3.82498200 0.32757700 0.59838100<br/> H 3.16906700 1.22500400 -0.78213600<br/> C 2.43656900 -1.40492000 -1.02943800<br/> H 2.69913700 -0.94113300 -1.98396900<br/> H 3.33374700 -1.86978500 -0.61123900<br/> H 1.69671400 -2.18644600 -1.22087000<br/> C 1.46008000 -1.02860100 1.25378600<br/> H 1.03842700 -0.29243100 1.93593700<br/> H 0.70851600 -1.80018700 1.06273500<br/> H 2.32628900 -1.50450100 1.72372900</p>                                                                                                                                                                                                                                                                                                                                                                                                                                   |
| 22    |                                                                                                                                                                                                                                                                                                                                                                                                                                                                                                                                                                                                                                                                                                                                                                                                                                                                                                                                                                                                                                                                                                                                                                             |                                                                                                                                                                                                                                                                                                                                                                                                                                                                                                                                                                                                                                                                                                                                                                                                                                                                                                                                                                                                                                                                                                                                                                                                                                                                                                                   |                                                                                                                                                                                                                                                                                                                                                                                                                                                                                                                                                                                                                                                                                                                                                                                                                                                                                                                                                                                                                                                                                                                                                                                                                                                                                                            |
|       | <p>-11</p> <p>C -0.62125800 0.06356100 0.00001800<br/> O -0.67362700 1.30856500 -0.00004000<br/> O -1.81108900 -0.69670300 0.00006100<br/> C -3.12456100 -0.08043200 0.00000000<br/> C -3.34462000 0.75427800 1.27014500<br/> H -2.67038700 1.60819500 1.28699600<br/> H -4.37853100 1.11006500 1.31346900<br/> H -3.15852600 0.14139300 2.15700200<br/> C -3.34457800 0.75403200 -1.27031300<br/> H -3.15854000 0.14094700 -2.15704700<br/> H -4.37845400 1.10991100 -1.31370700<br/> H -2.67026800 1.60788800 -1.28734400<br/> C -4.07338500 -1.28504600 0.00010600<br/> H -5.11533900 -0.95389100 0.00003500<br/> H -3.90533100 -1.90293100 -0.88571600<br/> H -3.90538200 -1.90272400 0.88608300<br/> C 0.49942200 -0.78082800 0.00002500<br/> H 1.87426000 -0.37378500 0.00000900<br/> C 2.32104000 0.97961000 0.00002400<br/> C 2.90333300 -1.35962900 0.00000000<br/> C 3.67398500 1.30072800 0.00001400<br/> H 1.57298400 1.76070900 0.00003600<br/> C 2.52089100 -1.02683300 -0.00001400<br/> H 2.16153900 -2.40287500 -0.00000200<br/> C 4.66185100 0.31109900 -0.00001100<br/> H 3.96485700 2.34814500 0.00002100<br/> H 4.99330300 -1.82033100 -0.00002700<br/> H 5.71443000 0.57156700 -0.00002000<br/> H 0.29927500 -1.84650100 0.00003000</p> | <p>-11</p> <p>C -3.04824500 -0.70476100 -0.05623600<br/> C -3.86638100 -0.85175200 -1.33938300<br/> H -3.39441700 -1.56827300 -2.01555400<br/> H -4.87202900 -1.20748800 -1.10378600<br/> H -3.94889900 0.10839600 -1.85355300<br/> C -3.66904900 0.34993800 0.86250200<br/> H -4.68913300 0.05275500 1.11917400<br/> H -3.09469200 0.46138200 1.78066400<br/> H -3.71051900 1.31588900 0.35394700<br/> C -2.88009900 -2.05984400 0.63511500<br/> H -2.38055600 -2.76625400 -0.03293300<br/> H -2.29751500 -1.96687700 1.54976700<br/> H -3.86463800 -2.46501000 0.88353700<br/> O -1.74065100 -0.22623500 -0.56320200<br/> C -0.71394500 0.07069600 0.25471600<br/> O -0.72168900 -0.10060400 1.45678500<br/> C 0.45119500 0.65497700 -0.52246800<br/> H 0.20698700 0.56645400 -1.58295200<br/> C 0.47419300 2.23152300 -0.23353800<br/> H 1.58967000 2.75950700 -0.07686500<br/> O -0.65757700 2.76514600 -0.23318900<br/> H 1.74922500 -0.07217800 -0.26187400<br/> C 2.39380400 -0.74793800 -1.30392800<br/> C 2.34616600 -0.09082000 1.00658500<br/> C 3.59676800 -1.42377600 -1.09352400<br/> H 1.94925600 -0.74344900 -2.29427500<br/> C 3.54184800 -0.77023300 1.22291500<br/> H 1.86446000 0.42908300 1.82374900<br/> C 4.17481500 -1.43969100 0.17354900<br/> H 4.07739300 -1.93814900 -1.91881700<br/> H 3.98610500 -0.77336700 2.21275000<br/> H 5.10841000 -1.96464300 0.34346100</p> | <p>-11</p> <p>C 3.15820600 -0.49549200 0.17497700<br/> C 4.09529900 0.04357200 1.26049400<br/> H 3.90353800 -0.45704700 2.12821000<br/> H 5.13879300 -0.12634400 0.98312100<br/> H 3.94159200 1.11654500 1.39867000<br/> C 3.39937300 0.24835700 -1.14450000<br/> H 4.43332200 0.10364600 -1.47045200<br/> H 2.72912300 -0.11503200 -1.92156200<br/> H 3.23243700 1.32023700 -1.00725400<br/> C 3.34882600 -2.01005100 0.02124300<br/> H 3.13186200 -2.51270000 0.96808200<br/> H 2.68550800 -2.40574200 -0.74510300<br/> H 4.38527900 -2.23024800 -0.25112300<br/> O 1.83389100 -0.19013800 0.70722000<br/> C 0.66851100 -0.44871600 -0.00788600<br/> O 0.69235700 -1.10135400 -1.05811900<br/> C -0.45432000 0.15225100 0.63456500<br/> H -0.24608400 0.57532200 1.60984800<br/> C -0.20847600 2.22363100 -0.47564400<br/> O -0.83891100 2.08263000 -1.46592200<br/> O 0.49690200 2.82693500 0.28532900<br/> C -1.83568700 -0.22127500 0.39097600<br/> C -2.82883900 0.14804900 1.33195000<br/> C -2.28558700 -0.91602200 -0.75778100<br/> C -4.17159400 -0.15515100 1.14390600<br/> H -2.52453500 0.68271500 2.22759000<br/> C -3.63236400 -1.22071600 -0.93819000<br/> H -1.55421900 -1.21445200 -1.49544100<br/> C -4.59230500 -0.84596900 0.00356700<br/> H -4.89692600 0.14651500 1.83655500<br/> H -3.93708100 -1.75795900 -1.83182100<br/> H -5.63959200 -1.08461800 -0.14512000</p> |
| 23 C1 |                                                                                                                                                                                                                                                                                                                                                                                                                                                                                                                                                                                                                                                                                                                                                                                                                                                                                                                                                                                                                                                                                                                                                                           |                                                                                                                                                                                                                                                                                                                                                                                                                                                                                                                                                                                                                                                                                                                                                                                                                                                                                                                                                                                                                                                                                                                                                                                                                                                                                                                 |                                                                                                                                                                                                                                                                                                                                                                                                                                                                                                                                                                                                                                                                                                                                                                                                                                                                                                                                                                                                                                                                                                                                                                                                                                                                                                          |
|       | <p>-11</p> <p>C -0.18837600 0.21191000 -0.00022300<br/> O -0.18014200 1.44808900 0.00034400<br/> C 0.88971100 -0.70649400 -0.00035500<br/> C 2.27031000 -0.39257900 -0.00012900<br/> O -1.65152600 -1.27268500 0.00076100<br/> O 0.63659000 -1.76119400 -0.00012200<br/> O -1.41676400 -0.45681200 -0.00095900<br/> C -2.58808500 0.36755600 0.00064500<br/> H -2.58742000 1.01837500 -0.87955200<br/> H -2.58653700 0.101611500 0.88252900<br/> C -3.79705800 -0.55074000 0.00003200<br/> H -3.79888300 -1.19218000 0.88500700<br/> H -4.71833000 0.03822500 0.00138800<br/> H -3.79988900 -1.18962900 -0.88679200<br/> C 2.71820900 1.07215200 -0.00054000<br/> H 2.32839100 1.60949700 -0.86850100<br/> H 2.34234200 1.60457100 0.87679200<br/> H 3.80947400 1.09665400 -0.00849000</p>                                                                                                                                                                                                                                                                                                                                                                                                                                                                   | <p>-11</p> <p>C -0.56518700 -0.37445900 0.31427500<br/> O -0.57503700 -0.83409100 1.43803500<br/> C 0.64938100 0.03863200 -0.47048700<br/> H 0.36990200 1.13667400 -1.52063700<br/> O -1.69107000 -0.14198700 -0.38694700<br/> C -2.94701300 -0.38281800 0.29754000<br/> H -2.98837900 -1.43195700 0.59813000<br/> H -2.97331200 0.23073900 1.20067000<br/> C 1.10598900 1.52051000 -0.00415700<br/> O 0.19225300 2.24522900 0.42451400<br/> O 2.31687600 1.75918300 -0.16531900<br/> C 1.82835200 -0.92023000 -0.42098500<br/> O 2.31212100 -1.33639200 -1.45878300<br/> C 2.41331200 -1.28844400 0.92176800<br/> H 1.63912900 -1.67526900 1.58545100<br/> H 3.21140900 -2.01764700 0.78404400<br/> H 2.81531200 -0.38278300 1.38286100<br/> C -0.06278100 -0.02459600 -0.66189600<br/> H -4.01629900 -0.64115100 -1.56244400<br/> H -5.02981100 -0.19140800 -0.18108700<br/> H -4.00141100 1.02570200 -0.95538500</p>                                                                                                                                                                                                                                                                                                                                                                                                                                                                            | <p>-11</p> <p>C -0.56096400 -0.60237800 0.08299000<br/> O -0.61833700 -1.33654200 1.05996000<br/> C 0.60783000 -0.13230000 -0.62951300<br/> H 0.39569600 0.33498900 -1.58322900<br/> O -1.70623100 -0.06494600 -0.45904100<br/> C -2.94545000 -0.40306800 -1.9297900<br/> H -3.06748400 -1.48957200 0.20028700<br/> H -2.91080900 -0.06715700 1.23305000<br/> C 1.08593600 1.67895100 0.43312500<br/> O 0.97417900 1.45191800 1.59980100<br/> H 1.34381800 2.45917500 -0.43194900<br/> C 1.90072200 -0.78654700 -0.57777600<br/> O 2.73816900 -0.62150200 -1.47653000<br/> C 2.26609400 -1.64086600 0.62700800<br/> H 1.64363000 -2.53796700 1.66414600<br/> H 3.31766400 -1.92038900 0.55011200<br/> H 2.08212700 -1.10016300 1.55709300<br/> C -0.06437200 0.27585800 -0.57319600<br/> H -4.09157700 -0.06944900 -1.60957600<br/> H -5.02725100 0.04633400 -0.10950000<br/> H -3.93355200 1.36064200 -0.57400700</p>                                                                                                                                                                                                                                                                                                                                                                                                                                                                        |

|                                                                                                                                                                                                                                                                                                                                                                                                                                                                                                                                                                                                                                                                                                                                                                                                                                      |                                                                                                                                                                                                                                                                                                                                                                                                                                                                                                                                                                                                                                                                                                                                                                                                                                                                                                                                                               |                                                                                                                                                                                                                                                                                                                                                                                                                                                                                                                                                                                                                                                                                                                                                                                                                                                                                                                                                                  |
|--------------------------------------------------------------------------------------------------------------------------------------------------------------------------------------------------------------------------------------------------------------------------------------------------------------------------------------------------------------------------------------------------------------------------------------------------------------------------------------------------------------------------------------------------------------------------------------------------------------------------------------------------------------------------------------------------------------------------------------------------------------------------------------------------------------------------------------|---------------------------------------------------------------------------------------------------------------------------------------------------------------------------------------------------------------------------------------------------------------------------------------------------------------------------------------------------------------------------------------------------------------------------------------------------------------------------------------------------------------------------------------------------------------------------------------------------------------------------------------------------------------------------------------------------------------------------------------------------------------------------------------------------------------------------------------------------------------------------------------------------------------------------------------------------------------|------------------------------------------------------------------------------------------------------------------------------------------------------------------------------------------------------------------------------------------------------------------------------------------------------------------------------------------------------------------------------------------------------------------------------------------------------------------------------------------------------------------------------------------------------------------------------------------------------------------------------------------------------------------------------------------------------------------------------------------------------------------------------------------------------------------------------------------------------------------------------------------------------------------------------------------------------------------|
| <p><b>24 C<sub>2</sub></b></p> 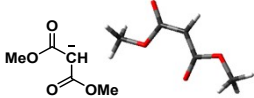                                                                                                                                                                                                                                                                                                                                                                                                                                                                                                                                                                                                                                                                                                                     |                                                                                                                                                                                                                                                                                                                                                                                                                                                                                                                                                                                                                                                                                                                                                                                                                                                                              |                                                                                                                                                                                                                                                                                                                                                                                                                                                                                                                                                                                                                                                                                                                                                                                                                                                                               |
| <p>-11</p> <p>C 1.12992300 -0.05094800 -0.00050300<br/> O 1.13579300 -1.28300000 -0.00153000<br/> C 0.06360000 0.87942500 -0.00018900<br/> C -1.32880800 0.62030100 0.00002900<br/> O -2.21920800 1.48091500 -0.00061300<br/> H 0.32907100 1.92804000 0.00002100<br/> O 2.35949000 0.62905300 0.00050900<br/> O -1.68381200 -0.71811400 0.00127400<br/> C -3.08704600 -0.98157400 0.00024000<br/> H -3.18313500 -2.06734500 0.00136500<br/> H -3.57583200 -0.56692400 0.88580600<br/> H -3.57411000 -0.56892400 -0.88721300<br/> C 3.51848800 -0.19975200 0.00059300<br/> H 3.55905900 -0.83903900 -0.88600100<br/> H 4.37185300 0.47882700 0.00149800<br/> H 3.55805400 -0.84018300 0.88639000</p>                                                                                                                                  | <p>-11</p> <p>C -1.17103000 -0.51341300 0.03242400<br/> O -1.10506000 -1.23226900 1.00320200<br/> C -0.05711200 0.29567300 -0.57801900<br/> H -0.30427900 0.49982000 -1.61940100<br/> O -2.31785900 -0.31091700 -0.65161800<br/> C -3.49727100 -0.92754500 -0.10089300<br/> H -4.30549600 -0.67178100 -0.78188500<br/> H -3.37522800 -2.00981800 -0.04358200<br/> H -3.70131200 -0.53264400 0.89552000<br/> C 0.05567500 1.74092600 0.14227200<br/> O -0.90331600 2.06100300 0.86455500<br/> O 1.09366700 2.36048600 -0.14872000<br/> C 1.29579200 -0.37084000 -0.57753800<br/> O 1.94522800 -0.59653000 -1.57613100<br/> O 1.73414900 -0.65433600 0.65975900<br/> C 3.04431900 -1.24669400 0.74694700<br/> H 3.21920400 -1.41097500 1.80741500<br/> H 3.07491300 -2.19273400 0.20498400<br/> H 3.79548900 -0.56999400 0.33740900</p>                                                                                                                         | <p>-11</p> <p>C -1.13874000 -0.63951400 -0.11261200<br/> O -1.14273700 -1.41929400 0.82570200<br/> C -0.04043800 0.08932900 -0.70633100<br/> H -0.27123300 0.55337200 -1.65579400<br/> O -2.32084200 -0.29100600 -0.73635400<br/> C -3.50823700 -0.86839900 -0.18295700<br/> H -4.33047000 -0.49186700 -0.78947100<br/> H -3.47783800 -1.95914500 -0.23158700<br/> H -3.64442000 -0.56679600 0.85818500<br/> C -0.00987700 1.94708900 0.44231100<br/> O -0.50918700 1.70983400 1.49766100<br/> O 0.49947800 2.72556900 -0.30170800<br/> C 1.35160500 -0.29188000 -0.60641500<br/> O 2.22129500 0.05314100 -1.40027800<br/> O 1.66822600 -1.03562800 0.49557600<br/> C 3.04858700 -1.39947800 0.62518700<br/> H 3.10926900 -1.99560800 1.53423000<br/> H 3.38416600 -1.98845000 -0.23100700<br/> H 3.68327000 -0.51532600 0.71496500</p>                                                                                                                          |
| <p><b>25 C<sub>1</sub></b></p>                                                                                                                                                                                                                                                                                                                                                                                                                                                                                                                                                                                                                                                                                                                      |                                                                                                                                                                                                                                                                                                                                                                                                                                                                                                                                                                                                                                                                                                                                                                                                                                                                              |                                                                                                                                                                                                                                                                                                                                                                                                                                                                                                                                                                                                                                                                                                                                                                                                                                                                               |
| <p>-11</p> <p>C 2.02538100 -0.32093400 0.02109200<br/> O 2.87192700 -1.25298500 0.06152100<br/> C 2.58119700 1.10384300 -0.00039200<br/> H 2.96295200 1.32094600 -1.00559200<br/> H 1.82980100 1.84973100 0.24754400<br/> H 3.43303000 1.15324200 0.68399100<br/> C 0.63554000 -0.56909200 -0.01349600<br/> H 0.39761200 -1.62506600 0.00230300<br/> C -0.44735200 0.37222000 -0.05631200<br/> O -0.33478400 1.62296900 -0.03877800<br/> N -1.75148700 -0.15713100 -0.14096400<br/> C -2.04250700 -1.57649300 -0.02015400<br/> H -1.88787000 -1.96481900 0.99786200<br/> H -3.08858900 -1.74252200 -0.28597100<br/> H -1.43238800 -2.16703500 -0.70494000<br/> C -2.87499300 0.72835400 0.12075700<br/> H -2.55556000 1.75262900 -0.04954800<br/> H -3.70940200 0.49145700 -0.54708300<br/> H -3.23799200 0.64410000 1.15728300</p>  | <p>-11</p> <p>C -0.74280600 0.52335400 -0.29370100<br/> O -0.60885400 1.29346200 -1.25129300<br/> C 0.46089300 -0.11747600 0.38539400<br/> H 0.20643400 -0.40487600 1.40614400<br/> C 0.87432900 -1.48412200 -0.34337100<br/> O -0.07828100 -2.19933900 -0.71320900<br/> O 2.10023900 -1.70101500 -0.42131100<br/> C 1.66933300 0.80051400 0.54163500<br/> O 2.12532500 0.99646200 1.65632100<br/> C 2.30861900 1.41342200 -0.67990400<br/> H 1.57719200 2.02737700 -1.20638700<br/> H 3.17608400 2.00191900 -0.38014400<br/> H 2.61145400 0.61182100 -1.35593000<br/> C -2.21386100 -0.78168500 1.24813600<br/> H -2.08787300 -0.36675900 2.25427300<br/> H -3.24316400 -1.13025800 1.15372500<br/> H -1.55899100 -1.63870700 1.10790800<br/> N -1.97303000 0.21782000 0.20668500<br/> C -3.15666000 0.84972500 -0.36698900<br/> H -3.77407400 1.27696000 0.42850300<br/> H -2.84219900 1.63751800 -1.04549800<br/> H -3.76013400 0.12131300 -0.91984500</p> | <p>-11</p> <p>C -0.76435400 -0.66539900 0.06745400<br/> O -0.71108100 -1.61326200 0.87323600<br/> C 0.39700500 -0.10785700 -0.61402900<br/> H 0.21460600 0.50972000 -1.48274400<br/> C 0.94224400 1.59413400 0.76370400<br/> O 1.00265500 2.51883200 0.01882600<br/> O 1.01687700 1.12251500 1.85079400<br/> C 1.69218500 -0.73835600 -0.67770900<br/> O 2.51041900 -0.43337400 -1.56685000<br/> C 2.11522300 -1.75055600 0.37744700<br/> H 1.51773300 -2.66058100 0.29377900<br/> H 3.17247500 -1.98027100 0.23249100<br/> H 1.94225100 -1.36281400 1.38251000<br/> C -2.19038200 1.00647400 -1.15646100<br/> H -2.23860400 0.63577000 -2.19012000<br/> H -3.13562500 1.50736100 -0.93685300<br/> H -1.39904300 1.75134600 -1.09018900<br/> N -1.99418500 -0.06042200 -0.18460000<br/> C -3.20836800 -0.69650900 0.30278500<br/> H -3.77557600 -1.16250100 -0.51506200<br/> H -2.93314800 -1.46340100 1.02141200<br/> H -3.85806000 0.03904800 0.78848000</p>   |
| <p><b>26</b></p>                                                                                                                                                                                                                                                                                                                                                                                                                                                                                                                                                                                                                                                                                                                                  |                                                                                                                                                                                                                                                                                                                                                                                                                                                                                                                                                                                                                                                                                                                                                                                                                                                                            |                                                                                                                                                                                                                                                                                                                                                                                                                                                                                                                                                                                                                                                                                                                                                                                                                                                                             |
| <p>-11</p> <p>C 0.75001900 -0.41527100 0.06207700<br/> C -1.62677500 -1.14406900 0.07319000<br/> C -1.17003500 1.24551300 0.01024200<br/> C -2.89086700 -0.39466500 -0.36841700<br/> H -1.76550200 -1.59957300 1.06423400<br/> H -1.33851100 -1.94524500 -0.60992400<br/> C -2.67662900 1.01640700 0.20017400<br/> H -0.95974900 1.70001800 -0.96906200<br/> H -0.75623200 1.91140300 0.77421400<br/> H -2.93713300 -0.35367000 -1.46139400<br/> H -3.80713200 -0.86866800 -0.01079300<br/> H -3.27993400 1.78047100 -0.29401400<br/> H -2.92371600 1.03092300 1.26639300<br/> N -0.60109500 -0.09919700 0.10637900<br/> C 3.04115500 0.43887200 -0.06075600<br/> N 4.19926100 0.26127500 -0.08411300<br/> O 1.08063800 -1.62635000 0.11133600<br/> C 1.67225800 0.67324600 -0.03535100<br/> H 1.34088400 1.70041200 -0.09315100</p> | <p>-11</p> <p>C -0.12984700 -0.74562500 -0.29213200<br/> C 2.27761600 -0.92834200 -0.69444900<br/> C 1.51945000 0.70487400 0.96446500<br/> C 3.48446600 -0.35747800 0.05814800<br/> H 2.25926200 -0.59922000 -1.73955500<br/> H 2.23622900 -2.01869100 -0.69004800<br/> C 2.97189900 0.99835400 0.56729400<br/> H 1.46044000 0.34904000 1.99970700<br/> H 0.86924900 1.56889400 0.83882100<br/> H 3.74018000 -1.00459500 0.90244300<br/> H 4.36511200 -0.27220100 -0.58004900<br/> H 3.55394200 1.39654700 1.39969800<br/> H 2.99108100 1.73345400 -0.24275500<br/> N 1.12345400 -0.36696400 0.02908200<br/> C -1.27821900 -0.07415000 0.46349200<br/> H -0.95555500 0.27918600 1.44628300<br/> C -2.36159900 -1.01864600 0.67014400<br/> N -3.22701400 -1.76244100 0.84471100<br/> O -0.36120500 -1.58915700 -1.16157300<br/> C -1.79081300 1.26302800 -0.31256500<br/> O -0.86917200 1.93725300 -0.80400300<br/> O -3.01371400 1.45457200 -0.28410900</p>   | <p>-11</p> <p>C 0.09521300 -0.90717200 0.20197000<br/> O 0.24215800 -1.76572500 0.09413200<br/> C 2.38092300 -1.15492400 -0.62019500<br/> N 3.38365400 -1.74796900 -0.63135500<br/> C -2.31122400 -0.81664000 0.74493300<br/> N -1.48837500 0.65538200 -1.01773100<br/> C -3.49856100 -0.24531900 -0.03883900<br/> H -2.27525500 -0.41338700 1.76566000<br/> H -2.32811300 -1.90474200 0.82624800<br/> C -2.92704300 1.04448300 0.64691300<br/> H -1.43900600 0.25370900 -2.03848500<br/> H -0.80479000 1.50375600 -0.95369100<br/> H -3.78873200 -0.93863100 -0.83448600<br/> H -4.37175800 -0.07332200 0.59290000<br/> H -3.49332700 1.40761400 -1.50637800<br/> N -2.91303900 1.83760300 0.10689600<br/> N -1.14611200 -0.37587300 -0.03019200<br/> C 1.20058500 -0.39074900 -0.59886800<br/> H 0.97763500 0.11612500 -1.53134800<br/> C 1.85977900 1.55912500 0.43206500<br/> O 2.95298600 1.72356800 0.00692500<br/> O 0.91808100 1.86878800 1.08206600</p> |
| <p><b>27</b></p>                                                                                                                                                                                                                                                                                                                                                                                                                                                                                                                                                                                                                                                                                                                                  |                                                                                                                                                                                                                                                                                                                                                                                                                                                                                                                                                                                                                                                                                                                                                                                                                                                                            |                                                                                                                                                                                                                                                                                                                                                                                                                                                                                                                                                                                                                                                                                                                                                                                                                                                                             |

|                                                                                                                                                                                                                                                                                                                                                                                                                                                                                                                                                                                                                                                                                                                                                                                                                                                                                                                                                                                                                                                                                                                                                                                                                                                                                |                                                                                                                                                                                                                                                                                                                                                                                                                                                                                                                                                                                                                                                                                                                                                                                                                                                                                                                                                                                                                                                                                                                                                                                                                                                                                                                                                                                                                      |                                                                                                                                                                                                                                                                                                                                                                                                                                                                                                                                                                                                                                                                                                                                                                                                                                                                                                                                                                                                                                                                                                                                                                                                                                                                                                                                                                                                                   |
|--------------------------------------------------------------------------------------------------------------------------------------------------------------------------------------------------------------------------------------------------------------------------------------------------------------------------------------------------------------------------------------------------------------------------------------------------------------------------------------------------------------------------------------------------------------------------------------------------------------------------------------------------------------------------------------------------------------------------------------------------------------------------------------------------------------------------------------------------------------------------------------------------------------------------------------------------------------------------------------------------------------------------------------------------------------------------------------------------------------------------------------------------------------------------------------------------------------------------------------------------------------------------------|----------------------------------------------------------------------------------------------------------------------------------------------------------------------------------------------------------------------------------------------------------------------------------------------------------------------------------------------------------------------------------------------------------------------------------------------------------------------------------------------------------------------------------------------------------------------------------------------------------------------------------------------------------------------------------------------------------------------------------------------------------------------------------------------------------------------------------------------------------------------------------------------------------------------------------------------------------------------------------------------------------------------------------------------------------------------------------------------------------------------------------------------------------------------------------------------------------------------------------------------------------------------------------------------------------------------------------------------------------------------------------------------------------------------|-------------------------------------------------------------------------------------------------------------------------------------------------------------------------------------------------------------------------------------------------------------------------------------------------------------------------------------------------------------------------------------------------------------------------------------------------------------------------------------------------------------------------------------------------------------------------------------------------------------------------------------------------------------------------------------------------------------------------------------------------------------------------------------------------------------------------------------------------------------------------------------------------------------------------------------------------------------------------------------------------------------------------------------------------------------------------------------------------------------------------------------------------------------------------------------------------------------------------------------------------------------------------------------------------------------------------------------------------------------------------------------------------------------------|
| <p>-2.1</p> <p>C 4.06934100 1.68105900 -0.01526900</p> <p>C 2.79966500 1.12700300 -0.00660400</p> <p>C 2.58107000 -0.30409800 0.00191500</p> <p>C 3.79859500 -1.08248800 0.00085300</p> <p>C 5.05575000 -0.50986500 -0.00815300</p> <p>C 5.23157200 0.89008100 -0.01671500</p> <p>H 4.16409400 2.76574100 -0.02088600</p> <p>H 1.94115400 1.79169300 -0.00414600</p> <p>H 3.70909600 -2.16728100 0.00736600</p> <p>H 5.92909800 -1.15939300 -0.00856200</p> <p>H 6.21962100 1.33623800 -0.02373100</p> <p>C 1.31682100 -0.92299500 0.01097700</p> <p>H 1.30608700 -2.01154800 0.02169700</p> <p>C 0.03790200 -0.29823900 0.01029900</p> <p>H 0.00690800 0.78690900 -0.00726300</p> <p>C -1.18348100 -0.99029600 0.01944200</p> <p>O -1.27109900 -2.29288300 0.02833800</p> <p>C -2.44676000 -0.21446500 0.00745400</p> <p>C -3.67136300 -0.93719200 -0.03274500</p> <p>C -2.57160600 1.20249700 0.03899500</p> <p>C -4.90848500 -0.30184600 -0.04611400</p> <p>H -3.59373500 -2.01709900 -0.05207600</p> <p>C -3.80727500 1.83296900 0.02588700</p> <p>H -1.68277900 1.82232200 0.07986300</p> <p>C -5.00206600 1.09252200 -0.01797600</p> <p>H -5.81516200 -0.90157400 -0.07846100</p> <p>H -3.84803600 2.91880200 0.05259800</p> <p>H -5.96563900 1.59037600 -0.02656900</p> | <p>-2.1</p> <p>C 3.18100400 -2.08180700 1.06336400</p> <p>C 2.19085500 -1.11021800 0.92475600</p> <p>C 2.20352000 -0.20536600 -0.14606900</p> <p>C 3.25206200 -0.31046600 -1.07165100</p> <p>C 4.24365200 -1.28323800 -0.94218700</p> <p>C 4.21464100 -2.17528600 0.12985300</p> <p>C 3.14521600 -2.77147500 1.90114500</p> <p>H 1.38008300 -1.05636100 1.64158500</p> <p>H 3.28626900 0.38182800 -1.90782600</p> <p>H 5.03641500 -1.34753400 -1.68090900</p> <p>H 4.98159600 -2.93531200 0.23354100</p> <p>C -0.23733500 0.52566200 0.13799000</p> <p>H -0.46359500 0.61374400 1.19235400</p> <p>C -1.21651300 0.18631400 -0.77418800</p> <p>O -1.06721700 0.12140400 -0.05182900</p> <p>C -2.61707900 -0.10508400 -0.24924300</p> <p>C -3.66094000 -0.19821100 -1.18278000</p> <p>C -2.94515100 -0.31318500 1.10261000</p> <p>C -4.97275000 -0.46365100 -0.79234800</p> <p>H -3.40042500 -0.05861900 -2.22461600</p> <p>C -4.25298800 -0.58156300 1.49900000</p> <p>H -2.16657300 -0.27974100 1.85545000</p> <p>C -5.27975500 -0.65661200 0.55378000</p> <p>H -5.75705800 -0.52301500 -1.54102000</p> <p>H -4.47265100 -0.74051000 2.55020200</p> <p>H -6.29765600 -0.86788100 0.86353400</p> <p>C 1.15870000 0.89643000 -0.28675900</p> <p>H 1.12507000 1.16089400 -1.34585200</p> <p>C 1.69820400 2.16017300 0.48613100</p> <p>O 1.62048300 2.13460300 1.74078100</p> <p>O 2.17703300 3.08407200 -0.22034300</p> | <p>-2.1</p> <p>C 3.63031600 -2.15553400 0.60131300</p> <p>C 2.40667800 -1.54356100 0.37372900</p> <p>C 2.27485500 -0.37448200 -0.46122800</p> <p>C 3.51383800 0.08330400 -1.03686800</p> <p>C 4.72510400 -0.53824500 -0.79656600</p> <p>C 4.81935700 -1.67544800 0.03072000</p> <p>H 3.66390900 -3.03262200 1.24501600</p> <p>H 1.52247400 -1.95064300 0.85369600</p> <p>H 3.48329800 0.95368900 -1.68804500</p> <p>H 5.62315800 -0.13928100 -1.26385100</p> <p>H 5.77050500 -2.16247500 0.21391500</p> <p>O -0.25963400 -0.17465300 -0.38426800</p> <p>H -0.34559600 -1.12940200 0.12468800</p> <p>C -1.43363500 0.53695500 -0.65599100</p> <p>O -1.44876700 1.72075600 -1.19892500</p> <p>C -2.74216300 -0.06885700 -0.28690500</p> <p>C -3.90989600 0.72140100 -0.44265900</p> <p>C -2.94743500 -1.38570100 0.20253600</p> <p>C -5.17657100 0.24312000 -0.12169700</p> <p>H -3.76902900 1.72339700 -0.82860900</p> <p>C -4.21150200 -1.86068600 0.52463600</p> <p>C -2.10261500 -2.05534400 0.31835700</p> <p>C -5.34988400 -1.05313600 0.36930200</p> <p>H -6.04121400 0.88815900 -0.25691100</p> <p>H -4.31836300 -2.87691900 0.89433100</p> <p>H -6.33633700 -1.43070700 0.61583100</p> <p>C 1.04966500 0.28810200 -0.71725400</p> <p>H 1.09112600 1.15852800 -1.36581700</p> <p>C 1.57147100 2.19340700 1.17526700</p> <p>O 1.04598000 1.67540100 2.08371500</p> <p>O 2.15219900 2.93355500 0.47683400</p> |
| <p>28</p> 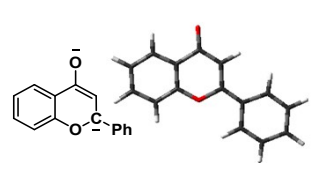                                                                                                                                                                                                                                                                                                                                                                                                                                                                                                                                                                                                                                                                                                                                                                                                                                                                                                                                                                                                                                                                                                                                                                                    |                                                                                                                                                                                                                                                                                                                                                                                                                                                                                                                                                                                                                                                                                                                                                                                                                                                                                                                                                                                                                                                                                                                                                                                                                                                                                                                                     |                                                                                                                                                                                                                                                                                                                                                                                                                                                                                                                                                                                                                                                                                                                                                                                                                                                                                                                                                                                                                                                                                                                                                                                                                                                                                                                                |
| <p>-2.1</p> <p>C -3.60947100 0.49649700 -0.02316700</p> <p>C -2.20890400 0.49385500 0.00323400</p> <p>C -1.54725300 -0.75542000 0.01609300</p> <p>C -2.27797400 -1.94747300 0.00063600</p> <p>C -3.68520500 -1.91483300 -0.02674500</p> <p>C -4.35064500 -0.69725100 -0.03890200</p> <p>H -4.09533400 1.46525300 -0.03089600</p> <p>H -1.74069100 -2.88987700 0.00985600</p> <p>H -4.23974500 -2.84783600 -0.03884900</p> <p>H -5.43561600 -0.66535500 -0.06004700</p> <p>C -1.42465200 1.75563400 0.01668000</p> <p>O -2.04544100 2.88857900 0.01773500</p> <p>O -0.19411500 -0.86160200 0.04649000</p> <p>C 0.63500000 0.31124500 0.02350700</p> <p>C 1.99940000 0.04815800 0.00873700</p> <p>C 2.55325400 -1.29963700 0.02587700</p> <p>C 3.00449000 1.10458100 -0.02778500</p> <p>C 3.91430400 -1.53280800 0.01042600</p> <p>H 1.87004300 -2.14040000 0.05191100</p> <p>C 4.35602600 0.83015300 -0.04278700</p> <p>H 2.68174500 2.14068200 -0.04657400</p> <p>C 4.86381200 -0.48861500 -0.02489600</p> <p>H 4.26055100 -2.56569300 0.02489600</p> <p>H 5.05171200 1.66789400 -0.07102200</p> <p>H 5.92927100 -0.68773100 -0.03718700</p> <p>C -0.04476800 1.56963300 0.02235900</p> <p>H 0.57003300 2.46493300 0.02450100</p>                                              | <p>-2.1</p> <p>C 3.60080300 0.43274700 -0.68164000</p> <p>C 2.21444200 0.38371600 -0.52286100</p> <p>C 1.64479700 -0.78628400 0.01229600</p> <p>C 2.45248200 -1.87233400 0.36174100</p> <p>C 3.83634100 -1.79664000 0.19800900</p> <p>C 4.41843000 -0.63893600 -0.31971500</p> <p>H 4.01265200 1.33726400 -1.11543600</p> <p>H 1.98330100 -2.76153100 0.76829000</p> <p>H 4.45508700 -2.64194900 0.48118200</p> <p>H 5.49397800 -0.57657900 -0.44748600</p> <p>C 1.32959700 1.50777800 -0.98651900</p> <p>O 1.85936400 2.45897800 -1.66468100</p> <p>O 0.30372000 -0.93221500 0.14946900</p> <p>C -1.92984400 -0.15269900 -0.11704600</p> <p>C -2.22215000 -1.45407000 -0.54280300</p> <p>C -2.98314000 0.77478500 -0.06898500</p> <p>C -3.51901700 -1.81729600 -0.91209100</p> <p>H -1.42627500 -2.18462900 -0.58815800</p> <p>C -4.27624400 0.41261000 -0.43706200</p> <p>C -2.77358700 1.77230800 0.29167000</p> <p>C -4.55432600 -0.88735800 -0.86359100</p> <p>H -3.71609300 -2.83310500 -1.23972300</p> <p>H -5.07186100 1.14929000 -0.38906200</p> <p>H -5.56156200 -1.16858700 -1.15144000</p> <p>C 0.00125800 1.35982100 -0.64982100</p> <p>H -0.70591900 2.12917500 -0.93916800</p> <p>C -0.51258500 0.27218200 0.27197200</p> <p>O -0.50153800 0.74006800 1.80069400</p> <p>O 0.13615100 0.03765600 2.61423300</p> <p>O -1.13492800 1.79930500 2.03521100</p>                                             | <p>-2.1</p> <p>C 3.78365200 0.49869900 -0.28403000</p> <p>C 2.38668700 0.47231000 -0.36791700</p> <p>C 1.73956700 -0.78121600 -0.29695100</p> <p>C 2.48189200 -1.95632600 -0.14253500</p> <p>C 3.88328400 -1.90048900 -0.06147600</p> <p>C 4.53578800 -0.67596600 -0.12999400</p> <p>H 4.25844000 1.47121100 -0.34574300</p> <p>H 1.95591500 -2.90355100 -0.09035400</p> <p>H 4.44725700 -2.82012400 0.05782100</p> <p>H 5.61831600 -0.62727100 -0.06725800</p> <p>C 1.58927000 1.71785500 -0.53835200</p> <p>O 2.20112500 2.84758600 -0.65157000</p> <p>O 0.39217900 -0.90963100 -0.38952200</p> <p>C -1.81286500 -0.04015200 -0.52934800</p> <p>C -2.33377400 -1.39501400 -0.54834600</p> <p>C -2.82317900 0.99388100 -0.67578500</p> <p>C -3.68671400 -1.65760200 -0.64893900</p> <p>H -1.63495400 -2.21906500 -0.47275200</p> <p>C -4.16724200 0.69391400 -0.77436900</p> <p>C -2.51636900 2.03395000 -0.69835100</p> <p>H -4.64858700 -0.63211300 -0.75650700</p> <p>H -4.01327200 -2.69656500 -0.65139500</p> <p>H -4.87409100 1.51595000 -0.87658700</p> <p>H -5.70695000 -0.85211800 -0.83778200</p> <p>C 0.21401900 1.51584000 -0.55308800</p> <p>H -0.41293400 2.39606800 -0.65140100</p> <p>C -0.44907600 0.25040100 -0.40791800</p> <p>C -0.99510400 0.29711500 2.31784400</p> <p>O -0.60821600 -0.79178900 2.50214000</p> <p>O -1.39847000 1.39086300 2.41646200</p>                                 |

N.2 WB97XD/DEF2TZVP

|                       |                                                                                                                                                                                                                                                                                                                                                                                                                                                                                                                                                                                                                             |                                                                                                                                                                                                                                                                                                                                                                                                                                                                                                                                                                                                                                                                                                                                          |                                                                                                                                                                                                                                                                                                                                                                                                                                                                                                                                                                                                                                                                                                                                         |
|-----------------------|-----------------------------------------------------------------------------------------------------------------------------------------------------------------------------------------------------------------------------------------------------------------------------------------------------------------------------------------------------------------------------------------------------------------------------------------------------------------------------------------------------------------------------------------------------------------------------------------------------------------------------|------------------------------------------------------------------------------------------------------------------------------------------------------------------------------------------------------------------------------------------------------------------------------------------------------------------------------------------------------------------------------------------------------------------------------------------------------------------------------------------------------------------------------------------------------------------------------------------------------------------------------------------------------------------------------------------------------------------------------------------|-----------------------------------------------------------------------------------------------------------------------------------------------------------------------------------------------------------------------------------------------------------------------------------------------------------------------------------------------------------------------------------------------------------------------------------------------------------------------------------------------------------------------------------------------------------------------------------------------------------------------------------------------------------------------------------------------------------------------------------------|
| <b>CO<sub>2</sub></b> | 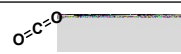                                                                                                                                                                                                                                                                                                                                                                                                                                                                                                                                           |                                                                                                                                                                                                                                                                                                                                                                                                                                                                                                                                                                                                                                                                                                                                          |                                                                                                                                                                                                                                                                                                                                                                                                                                                                                                                                                                                                                                                                                                                                         |
|                       | <pre> O 1 C 0.00000000 0.00000000 -0.00001400 O 0.00000000 0.00000000 1.15561700 O 0.00000000 0.00000000 -1.15560700 </pre>                                                                                                                                                                                                                                                                                                                                                                                                                                                                                                 |                                                                                                                                                                                                                                                                                                                                                                                                                                                                                                                                                                                                                                                                                                                                          |                                                                                                                                                                                                                                                                                                                                                                                                                                                                                                                                                                                                                                                                                                                                         |
| <b>i</b>              | <b>R<sub>i</sub><sup>-</sup> coordinates</b>                                                                                                                                                                                                                                                                                                                                                                                                                                                                                                                                                                                | <b>R<sub>i</sub>-COO<sup>-</sup> coordinates</b>                                                                                                                                                                                                                                                                                                                                                                                                                                                                                                                                                                                                                                                                                         | <b>R<sub>i</sub>-TS coordinates</b>                                                                                                                                                                                                                                                                                                                                                                                                                                                                                                                                                                                                                                                                                                     |
| <b>1</b>              |                                                                                                                                                                                                                                                                                                                                                                                                                                                                                                                                            |                                                                                                                                                                                                                                                                                                                                                                                                                                                                                                                                                                                                                                                         |                                                                                                                                                                                                                                                                                                                                                                                                                                                                                                                                                                                                                                                      |
|                       | <pre> -1 1 C 1.18396700 -0.18409000 -0.00006800 C 0.28242800 0.72393400 0.00002200 C 0.54110000 1.06889100 0.00001700 H 1.03065400 2.03568500 0.00009000 C -1.06609900 -0.54689800 -0.00007500 H -2.30329000 -1.04150300 -0.00003000 C -0.84970500 0.84490800 0.00003400 H -1.61794900 1.60916100 0.00011200 C 0.19071000 -1.18277800 -0.00003100 H 0.36306200 -2.25265400 0.00052300 </pre>                                                                                                                                                                                                                                | <pre> -1 1 C 2.04881600 0.69680600 -0.16751800 C 0.88512800 1.12490800 0.34372100 C 1.98742400 -0.75744000 -0.34045700 H 2.78572200 -1.36440200 -0.74601700 C -0.02728300 -0.03789900 0.56129700 H -0.20062400 -0.15854300 1.64109400 C 0.78925400 -1.19493000 0.07352900 H 0.42773200 -2.21206700 0.06435600 C -1.47192900 0.04273600 -0.03865300 O -1.86395100 1.15731200 -0.43446600 O -2.11104000 -1.02819200 -0.02807300 H 2.90106300 1.31171800 -0.42437700 H 0.61757800 2.14524800 0.57374700 </pre>                                                                                                                                                                                                                              | <pre> -1 1 C -1.96390600 -0.57895700 -0.10073600 C -1.12565400 -0.68244900 0.99399600 C -1.62382500 0.59974000 -0.82486100 H -2.08926400 0.93347100 -1.74310100 C -0.19265200 0.39112200 0.94165600 H 0.40281100 0.72509500 1.77905100 C -0.56874100 1.21293400 -0.17601500 H -0.07820600 2.13158800 -0.46860200 C 1.54287800 -0.23656200 -0.16309300 O 1.25942200 -1.15018000 -0.86459200 O 2.39339200 0.49202900 0.24660000 H -2.73455400 -1.28630600 -0.38115100 H -1.13190500 -1.47360800 1.73205800 </pre>                                                                                                                                                                                                                         |
| <b>2</b>              |                                                                                                                                                                                                                                                                                                                                                                                                                                                                                                                                            |                                                                                                                                                                                                                                                                                                                                                                                                                                                                                                                                                                                                                                                         |                                                                                                                                                                                                                                                                                                                                                                                                                                                                                                                                                                                                                                                      |
|                       | <pre> -1 1 C 0.28225400 -0.72362600 -0.00012000 C 0.28242800 0.72393400 0.00010500 C -0.94705800 1.41019200 0.00019600 C -2.13272600 0.70656600 0.00010700 C -2.13282600 -0.70659000 -0.00012100 C -0.94705200 -1.41006500 -0.00023200 C 1.63114000 -1.15138300 0.00036900 H -0.96369100 2.49663700 0.00026000 H -3.07742900 1.23924100 0.00019700 H -3.07754800 -1.23918200 -0.00012600 H -0.96345800 -2.49653200 -0.00023100 H 1.97740200 -2.17673500 0.00084400 C 2.43367600 -0.00024100 -0.00014000 C 3.51789900 -0.00025400 -0.00000800 C 1.63150500 1.15126200 -0.00022100 H 1.97876500 2.17653400 -0.00059100 </pre> | <pre> -1 1 C -1.05014800 0.94428000 0.01298800 C -0.28497800 -0.17947000 0.35529600 C -0.84870700 -1.44085200 0.34543400 C -2.18896600 -1.57572000 -0.00866200 C -2.94919600 -0.46118800 -0.34666600 C -2.38549100 0.80992700 -0.33903100 C -0.18993500 2.12486300 0.11249000 H -0.25434400 -2.30896000 0.60242400 H -2.64415100 -2.55845200 -0.02204300 H -3.99000200 -0.58557800 -0.61962900 H -2.97968700 1.67666300 -0.60352600 H -0.51376600 3.13622700 -0.09373500 C 1.12056600 0.26060000 0.68084400 H 1.36108100 0.02008600 1.72078900 C 1.03635300 1.74506000 0.48746400 H 1.88321000 2.40100100 0.63283500 C 2.17627000 -0.48677500 -0.20188900 O 2.57445100 0.09528300 -1.22838900 O 2.49366100 -1.62345100 0.20254800 </pre> | <pre> -1 1 C 0.90582200 0.97224100 0.03737900 C 0.25454700 -0.09326800 -0.65956700 C 0.89355800 -1.33475400 -0.77799700 C 2.13585400 -1.52079100 -0.20274000 C 2.76555300 -0.48085700 0.50377100 C 2.15847300 0.75437700 0.62609600 C 0.05418500 2.12018100 -0.03189400 H 0.41356900 -2.14860200 -1.31182300 H 2.63341700 -2.47955200 -0.29479500 H 3.73740600 -0.65240100 0.95204900 H 2.65360000 1.55235700 1.17053200 C 0.25881300 3.08383900 0.41525600 C -1.03037600 0.38822600 -1.08509400 H -1.63976100 -0.07423200 -1.84742900 C -1.07285400 1.76952600 -0.74349400 H -1.90097200 2.43071500 -0.96682600 C -2.10233100 -0.67121400 0.57330400 O -1.88988500 -0.06711900 1.56467300 O -2.60144800 -1.57464700 -0.00911500 </pre> |
| <b>3</b>              |                                                                                                                                                                                                                                                                                                                                                                                                                                                                                                                                          |                                                                                                                                                                                                                                                                                                                                                                                                                                                                                                                                                                                                                                                       |                                                                                                                                                                                                                                                                                                                                                                                                                                                                                                                                                                                                                                                    |
|                       | <pre> -1 1 C -0.00000100 0.74068600 0.00007000 H 0.00000800 1.82044500 0.00031600 C -1.20917600 0.05901300 0.00000700 N -2.23139900 -0.49805000 -0.00005700 C 1.20917500 0.05901000 0.00000500 N 2.23139900 -0.49804900 -0.00005800 </pre>                                                                                                                                                                                                                                                                                                                                                                                  | <pre> -1 1 C -0.28023800 0.02613700 0.49314600 H -0.21839700 0.02596600 1.58515700 C -0.88512900 1.28221300 0.07286400 N -1.35227300 2.27379600 -0.26505700 C 1.26299900 -0.11190100 0.00275100 O 1.84613600 0.96671600 -0.09960300 O 1.63541400 -1.27525500 -0.14431400 C -1.09964800 -1.10622700 0.08462500 N -1.73657100 -2.00222100 -0.24267800 </pre>                                                                                                                                                                                                                                                                                                                                                                               | <pre> -1 1 C -0.54383900 0.03198700 0.56893500 H -0.33867000 0.03565200 1.63500000 C -1.05000600 1.25490000 0.07548200 N -1.41041400 2.27122200 -0.34441600 C 1.53975200 -0.07608600 -0.03140400 O 1.89111500 1.05299600 -0.03866300 O 1.74915100 -1.23318700 -0.15430000 C -1.18112200 -1.14315200 0.10787700 N -1.63846700 -2.12836700 -0.28653200 </pre>                                                                                                                                                                                                                                                                                                                                                                             |
| <b>4</b>              |                                                                                                                                                                                                                                                                                                                                                                                                                                                                                                                                          |                                                                                                                                                                                                                                                                                                                                                                                                                                                                                                                                                                                                                                                       |                                                                                                                                                                                                                                                                                                                                                                                                                                                                                                                                                                                                                                                    |
|                       | <pre> -1 1 C 0.00000000 0.00000000 -0.48614700 H 0.00000000 0.00000000 -1.55972000 C 0.00000000 0.00000000 0.74547500 </pre>                                                                                                                                                                                                                                                                                                                                                                                                                                                                                                | <pre> -1 1 C 0.00000000 0.00000000 2.11646700 H 0.00000000 0.00000000 3.18190600 C 0.00000000 0.00000000 0.91416900 O 0.00000000 0.00000000 -0.58235000 O 0.00000000 1.12321100 -1.11697700 O 0.00000000 -1.12321100 -1.11697700 </pre>                                                                                                                                                                                                                                                                                                                                                                                                                                                                                                  | <pre> -1 1 C 2.53521800 0.00000100 0.02300500 H 3.60174100 -0.00010600 0.09607100 C 1.31121300 0.00015100 -0.06422000 C -1.05939900 -0.00002300 0.00108200 O -1.27014700 -1.15047100 0.00904200 O -1.27034500 1.15038700 0.00905000 </pre>                                                                                                                                                                                                                                                                                                                                                                                                                                                                                              |
| <b>5</b>              |                                                                                                                                                                                                                                                                                                                                                                                                                                                                                                                                          |                                                                                                                                                                                                                                                                                                                                                                                                                                                                                                                                                                                                                                                       |                                                                                                                                                                                                                                                                                                                                                                                                                                                                                                                                                                                                                                                    |

|   |                                                                                                                                                                                                                                                                                                                                                                                                                                                                                                                                                                                                                                                                                                                                                                                                                                                                                                                                                                                                                                                                                                 |                                                                                                                                                                                                                                                                                                                                                                                                                                                                                                                                                                                                                                                                                                                                                                                                                                                                                                                                                                                                                                                                                                                                                                                                                                    |                                                                                                                                                                                                                                                                                                                                                                                                                                                                                                                                                                                                                                                                                                                                                                                                                                                                                                                                                                                                                                                                                                                                                                                                                                   |
|---|-------------------------------------------------------------------------------------------------------------------------------------------------------------------------------------------------------------------------------------------------------------------------------------------------------------------------------------------------------------------------------------------------------------------------------------------------------------------------------------------------------------------------------------------------------------------------------------------------------------------------------------------------------------------------------------------------------------------------------------------------------------------------------------------------------------------------------------------------------------------------------------------------------------------------------------------------------------------------------------------------------------------------------------------------------------------------------------------------|------------------------------------------------------------------------------------------------------------------------------------------------------------------------------------------------------------------------------------------------------------------------------------------------------------------------------------------------------------------------------------------------------------------------------------------------------------------------------------------------------------------------------------------------------------------------------------------------------------------------------------------------------------------------------------------------------------------------------------------------------------------------------------------------------------------------------------------------------------------------------------------------------------------------------------------------------------------------------------------------------------------------------------------------------------------------------------------------------------------------------------------------------------------------------------------------------------------------------------|-----------------------------------------------------------------------------------------------------------------------------------------------------------------------------------------------------------------------------------------------------------------------------------------------------------------------------------------------------------------------------------------------------------------------------------------------------------------------------------------------------------------------------------------------------------------------------------------------------------------------------------------------------------------------------------------------------------------------------------------------------------------------------------------------------------------------------------------------------------------------------------------------------------------------------------------------------------------------------------------------------------------------------------------------------------------------------------------------------------------------------------------------------------------------------------------------------------------------------------|
|   | <p>-11</p> <p>C 1.43448500 1.19811100 0.00000100</p> <p>C 0.04888300 1.19975400 -0.00000100</p> <p>C -0.67658500 0.00000000 -0.00000500</p> <p>C 0.04888300 -1.19975400 -0.00000100</p> <p>C 1.43448400 -1.19811100 0.00000100</p> <p>C 2.13650900 0.00000000 0.00000100</p> <p>H 1.97026200 2.13973200 0.00000300</p> <p>H -0.49088500 2.13859800 0.00000000</p> <p>H -0.49088600 -2.13859700 0.00000000</p> <p>H 1.97026200 -2.13973200 0.00000200</p> <p>H 3.21917600 -0.00000100 0.00000200</p> <p>C -2.11109800 -0.00000100 -0.00000100</p> <p>C -3.34521700 0.00000100 0.00000300</p>                                                                                                                                                                                                                                                                                                                                                                                                                                                                                                     | <p>-11</p> <p>C -2.94762100 1.20115400 0.02105800</p> <p>C -1.56270200 1.20449000 0.02063400</p> <p>C -0.85411000 0.00009800 0.00002000</p> <p>C -1.56252500 -1.20440200 -0.02062000</p> <p>C -2.94744100 -1.20127400 -0.02108400</p> <p>C -3.64319100 -0.00011100 -0.00001800</p> <p>H -3.48617900 2.14006900 0.03751100</p> <p>H -0.10184000 2.13984100 0.03644600</p> <p>H -0.10180700 -2.13966900 -0.03643000</p> <p>H -3.48586000 -2.14026800 -0.03755900</p> <p>H -4.72572300 -0.00019200 -0.00003500</p> <p>C 0.57755700 0.00017800 0.00003000</p> <p>C 1.78320500 0.00014700 0.00005200</p> <p>C 3.27467500 -0.00001300 0.00000800</p> <p>O 3.81405000 -1.12160800 0.05115800</p> <p>O 3.81434500 1.12143500 -0.05120900</p>                                                                                                                                                                                                                                                                                                                                                                                                                                                                                               | <p>-11</p> <p>C 3.13412700 1.20990900 -0.08256000</p> <p>C 1.74867100 1.19170000 -0.09233300</p> <p>C 1.04246100 -0.01563800 -0.01033800</p> <p>C 1.78214600 -1.20200800 0.08151400</p> <p>C 3.16757300 -1.17995300 0.09127200</p> <p>C 3.85227200 0.02515500 0.00934400</p> <p>H 3.65660700 2.15662800 -0.14700800</p> <p>H 1.19562600 2.11995500 -0.16389200</p> <p>H 1.25533600 -2.14592500 0.14558400</p> <p>H 3.71637000 -2.11110500 0.16327900</p> <p>H 4.93475700 0.04087900 0.01709200</p> <p>C -0.39159500 -0.03585000 -0.01958500</p> <p>C -1.62107800 -0.05276300 -0.02698100</p> <p>C -3.98363100 0.00889900 0.00965600</p> <p>O -4.16939100 0.22493700 1.14466900</p> <p>O -4.22365600 -0.19458000 -1.11677500</p>                                                                                                                                                                                                                                                                                                                                                                                                                                                                                                   |
| 6 |                                                                                                                                                                                                                                                                                                                                                                                                                                                                                                                                                                                                                                                                                                                                                                                                                                                                                                                                                                                                                |                                                                                                                                                                                                                                                                                                                                                                                                                                                                                                                                                                                                                                                                                                                                                                                                                                                                                                                                                                                                                                                                                                                                                   |                                                                                                                                                                                                                                                                                                                                                                                                                                                                                                                                                                                                                                                                                                                                                                                                                                                                                                                                                                                                                                                                                                                                                |
|   | <p>-11</p> <p>C -1.29748500 -0.40338600 0.00577800</p> <p>C -2.42676200 -1.26668000 -0.13408600</p> <p>C -1.62942100 0.97072000 0.17141100</p> <p>C -3.72563400 -0.81047600 -0.13062300</p> <p>C -2.24325600 -2.33026500 -0.25200600</p> <p>C -2.94252200 1.41744800 0.17414700</p> <p>C -0.85322100 1.70124500 0.33928200</p> <p>C -4.01405800 0.54880900 0.01732900</p> <p>H -4.53504600 -1.52398200 -0.24656300</p> <p>H -3.12825600 2.47816400 0.31040800</p> <p>H -5.03465300 0.90935400 0.01603800</p> <p>C 1.29743500 -0.40329900 -0.00573600</p> <p>C 1.62943900 0.97076600 -0.17125900</p> <p>C 2.42671800 -1.26663900 0.13418700</p> <p>C 2.94260000 1.41742200 -0.17416900</p> <p>H 0.85331400 1.70143800 -0.33884700</p> <p>C 3.72560700 -0.81053900 0.13056400</p> <p>H 2.24317400 -2.33019800 0.25229900</p> <p>C 4.01409600 0.54874700 -0.01750200</p> <p>H 3.12835900 2.47813900 -0.31038600</p> <p>H 4.53497900 -1.52407900 0.24656200</p> <p>H 5.03470900 0.90924900 -0.01639600</p> <p>C -0.00003100 -0.97984500 -0.00008400</p> <p>H 0.00001600 -2.06736300 -0.00012800</p> | <p>-11</p> <p>C 0.02856700 0.78455000 -0.59630200</p> <p>H 0.05669700 0.97945500 -1.66954100</p> <p>C 1.25971500 -0.02557500 -0.25329000</p> <p>C 2.38381200 0.06315300 -1.07043900</p> <p>C 1.32753200 -0.84663000 0.86909300</p> <p>C 3.54440300 -0.63828500 -0.77535700</p> <p>H 2.34937400 0.69315100 -1.95255500</p> <p>C 2.48419700 -1.55055300 1.16920100</p> <p>H 0.46492700 -0.93695400 1.51753200</p> <p>C 3.59944400 -1.44966300 0.34844700</p> <p>H 4.40511300 -0.55338800 -1.42757500</p> <p>H 2.51432500 -2.18304800 2.04820200</p> <p>H 4.50144200 -2.00178200 0.58111800</p> <p>C -1.25869300 0.03157600 -0.31858700</p> <p>C -1.75343000 -0.85474900 -1.27299300</p> <p>C -1.95785700 0.16896200 0.87731900</p> <p>C -2.90907000 -1.58544500 -1.04195600</p> <p>H -1.22282100 -0.97274100 -2.21133300</p> <p>C -3.11493000 -0.56068200 1.11383700</p> <p>H -1.58910000 0.85450000 1.63083900</p> <p>C -3.59520900 -1.44176800 0.15618700</p> <p>H -3.27632000 -2.26610900 -1.80031100</p> <p>H -3.64380400 -0.43778300 2.05111900</p> <p>H -4.49890200 -2.00935000 0.33967900</p> <p>C 0.00622500 2.19164600 0.08548600</p> <p>O 0.55060600 2.30885300 1.20165700</p> <p>O -0.59177600 3.08050100 -0.55803800</p> | <p>-11</p> <p>C -0.01296500 0.34441300 -0.74695400</p> <p>C 0.00115800 1.05208900 -1.57045300</p> <p>C 1.27785300 -0.20940400 -0.46268400</p> <p>C 2.41883100 0.41739500 -1.03570200</p> <p>C 1.56095000 -1.33866600 0.34318900</p> <p>C 3.70495300 -0.02054700 -0.80497800</p> <p>C 2.26176800 1.27807900 -1.67773300</p> <p>C 2.85924200 -1.77587700 0.56559900</p> <p>H 0.75728100 -1.90498000 0.78754100</p> <p>C 3.95154300 -1.12714600 0.00686900</p> <p>H 4.53343100 0.50413000 -1.26854000</p> <p>H 3.01432900 -2.65015000 1.18920500</p> <p>H 4.96103800 -1.47254600 0.19136000</p> <p>C -1.32507500 -0.15508200 -0.45484100</p> <p>C -2.41086500 0.28143700 -1.25942600</p> <p>C -1.68031600 -1.00728900 0.61788500</p> <p>C -3.71386100 -0.10719000 -1.02815400</p> <p>H -2.19838700 0.94535000 -2.09134900</p> <p>C -2.99288000 -1.39702500 0.84184300</p> <p>H -0.93027800 -1.33210000 1.32197800</p> <p>C -4.02857000 -0.96369300 0.02632800</p> <p>H -4.49929800 0.25707100 -1.68161400</p> <p>C -3.20767600 -2.04769600 1.68298900</p> <p>H -5.04951800 -1.27539000 0.20641000</p> <p>C 0.11283700 2.11712600 0.95558100</p> <p>O -0.05199300 1.50251600 1.93750400</p> <p>O 0.30525400 3.03441200 0.25153000</p> |
| 7 |                                                                                                                                                                                                                                                                                                                                                                                                                                                                                                                                                                                                                                                                                                                                                                                                                                                                                                                                                                                                              |                                                                                                                                                                                                                                                                                                                                                                                                                                                                                                                                                                                                                                                                                                                                                                                                                                                                                                                                                                                                                                                                                                                                                 |                                                                                                                                                                                                                                                                                                                                                                                                                                                                                                                                                                                                                                                                                                                                                                                                                                                                                                                                                                                                                                                                                                                                              |
|   | <p>-11</p> <p>C 1.07880500 0.00001100 -0.00000800</p> <p>C 0.33961200 -1.21166900 -0.00003600</p> <p>C -1.02044300 -1.21919900 -0.00026700</p> <p>C -1.80757100 -0.00001300 -0.00020800</p> <p>C -1.02045600 1.21922400 -0.00018300</p> <p>C 0.33957500 1.21172700 -0.00015600</p> <p>H 0.87770500 -2.15374800 -0.00002400</p> <p>H -1.54636800 -2.16820600 -0.00042400</p> <p>H -1.54643000 2.16818500 -0.00024200</p> <p>C 0.87765900 2.15380900 -0.00032700</p> <p>C 2.48099000 0.00005700 0.00012400</p> <p>C 3.64199800 -0.00007000 0.00023400</p> <p>C -3.17247700 -0.00004500 0.00029800</p> <p>H -3.73237800 -0.92797300 0.00071700</p> <p>H -3.73238100 0.92786200 0.00127200</p>                                                                                                                                                                                                                                                                                                                                                                                                      | <p>-11</p> <p>C 2.17913300 0.00701300 0.00834000</p> <p>C 1.50924100 1.22887600 -0.03683300</p> <p>C 0.15739700 1.27532600 0.24663900</p> <p>C -0.55261100 0.12237900 0.57687400</p> <p>C 0.13490100 -1.08991500 0.61724300</p> <p>C 1.48552700 -1.15783700 0.33719300</p> <p>H 2.04884500 2.13218800 -0.28866800</p> <p>H -0.35887500 2.22708800 2.13348500</p> <p>H -0.40027500 -1.99600100 0.87368500</p> <p>H 2.00729100 -2.10493800 0.37428500</p> <p>C -2.01916300 0.18262600 0.86375100</p> <p>H -2.28463000 -0.55782000 1.62192300</p> <p>H -2.28681900 1.15905300 1.27088300</p> <p>C 3.57953500 -0.05155100 -0.27581500</p> <p>N 4.70606600 -0.09895600 -0.50305300</p> <p>C -2.95270000 -0.08003400 -0.35586600</p> <p>O -4.16884200 0.08617500 -0.12311900</p> <p>O -2.43060300 -0.43469800 -1.43103900</p>                                                                                                                                                                                                                                                                                                                                                                                                            | <p>-11</p> <p>C 2.05553100 -0.00000800 -0.01856100</p> <p>C 1.37602800 1.20938300 0.24284000</p> <p>C 0.09819100 1.21297900 0.72432000</p> <p>C -0.62788200 -0.00008100 0.98034800</p> <p>C 0.09818900 -1.21310300 0.72413200</p> <p>C 1.37602500 -1.20943700 0.24265300</p> <p>H 1.88347800 2.14998500 0.06072400</p> <p>H -0.39446900 2.15925700 0.91738100</p> <p>H -0.39447400 -2.15941000 0.91704600</p> <p>H 1.88347200 -2.15003300 0.06039000</p> <p>C -1.95124400 -0.00011400 1.39621300</p> <p>H -2.41367900 -0.92418600 1.72078800</p> <p>H -2.41367900 0.92390700 1.72093200</p> <p>C 3.37637800 0.00002900 -0.51184400</p> <p>N 4.46041200 0.00005800 -0.91795400</p> <p>C -2.85622000 0.00008600 -0.83834700</p> <p>O -2.94010000 1.15237900 -1.03882700</p> <p>O -2.94033800 -1.15217200 -1.03893500</p>                                                                                                                                                                                                                                                                                                                                                                                                            |
| 8 |                                                                                                                                                                                                                                                                                                                                                                                                                                                                                                                                                                                                                                                                                                                                                                                                                                                                                                                                                                                                              |                                                                                                                                                                                                                                                                                                                                                                                                                                                                                                                                                                                                                                                                                                                                                                                                                                                                                                                                                                                                                                                                                                                                                 |                                                                                                                                                                                                                                                                                                                                                                                                                                                                                                                                                                                                                                                                                                                                                                                                                                                                                                                                                                                                                                                                                                                                              |
|   | <p>-11</p> <p>C -4.75904700 -1.15128600 -0.23551400</p> <p>C -3.51668700 -0.60407500 -0.14722000</p> <p>C -3.29623500 0.79299300 0.18936900</p> <p>C -2.30019100 -1.36019900 -0.38619400</p> <p>C -2.05511300 1.32782800 0.28147100</p> <p>H -4.16669600 1.41546600 0.37151700</p> <p>H -1.06605700 -0.80557100 -0.27805300</p> <p>C -2.39579300 -2.40427700 -0.66626000</p> <p>C -0.86678900 0.56388800 0.06947300</p> <p>H -1.94149700 2.37612200 0.53418500</p> <p>H -0.20287400 -1.42731100 -0.48551600</p>                                                                                                                                                                                                                                                                                                                                                                                                                                                                                                                                                                                 | <p>-11</p> <p>C 2.42589200 -0.26271900 -0.59616200</p> <p>C 2.07045900 1.04183500 -0.94383100</p> <p>C 1.45145200 -1.08141800 -0.02943300</p> <p>C 0.78956900 1.51141800 -0.72783000</p> <p>H 2.81361200 1.69276200 -1.38828500</p> <p>C 0.16095200 -0.62286900 0.16995000</p> <p>H 1.71022300 -2.09307100 0.25762400</p> <p>C -0.18657100 0.68114300 -0.17783900</p> <p>H 0.52701300 2.52700400 -0.99516000</p> <p>H -0.57414800 -1.28037200 0.61558600</p> <p>C -1.54531600 1.23443000 0.06879300</p>                                                                                                                                                                                                                                                                                                                                                                                                                                                                                                                                                                                                                                                                                                                            | <p>-11</p> <p>C 3.80700500 -0.50910300 -1.23589800</p> <p>C 4.46908300 -0.67608400 1.03402500</p> <p>O 4.14268700 -1.77487700 1.28941100</p> <p>O 4.93247500 0.38730900 1.21811400</p> <p>C 2.51329300 -0.08769900 -0.96823100</p> <p>C 2.17189800 1.30182600 -0.82686700</p> <p>C 1.43093400 -1.00597200 -0.75658600</p> <p>C 0.91379100 1.70597600 -0.49651600</p> <p>H 2.94964900 2.04045600 -0.98871200</p> <p>C 0.17281200 -0.58374200 -0.43606000</p> <p>H 1.63197000 -2.06768700 -0.84726300</p>                                                                                                                                                                                                                                                                                                                                                                                                                                                                                                                                                                                                                                                                                                                           |



|    |                                                                                                                                                                                                                                                                                                                                                                                                                                                                                                                                                                                                                                                                                                                                                                                                                                                                                                                                                        |                                                                                                                                                                                                                                                                                                                                                                                                                                                                                                                                                                                                                                                                                                                                                                                                                                                                                                                                                                                                                                                                                           |                                                                                                                                                                                                                                                                                                                                                                                                                                                                                                                                                                                                                                                                                                                                                                                                                                                                                                                                                                                                                                                                                          |
|----|--------------------------------------------------------------------------------------------------------------------------------------------------------------------------------------------------------------------------------------------------------------------------------------------------------------------------------------------------------------------------------------------------------------------------------------------------------------------------------------------------------------------------------------------------------------------------------------------------------------------------------------------------------------------------------------------------------------------------------------------------------------------------------------------------------------------------------------------------------------------------------------------------------------------------------------------------------|-------------------------------------------------------------------------------------------------------------------------------------------------------------------------------------------------------------------------------------------------------------------------------------------------------------------------------------------------------------------------------------------------------------------------------------------------------------------------------------------------------------------------------------------------------------------------------------------------------------------------------------------------------------------------------------------------------------------------------------------------------------------------------------------------------------------------------------------------------------------------------------------------------------------------------------------------------------------------------------------------------------------------------------------------------------------------------------------|------------------------------------------------------------------------------------------------------------------------------------------------------------------------------------------------------------------------------------------------------------------------------------------------------------------------------------------------------------------------------------------------------------------------------------------------------------------------------------------------------------------------------------------------------------------------------------------------------------------------------------------------------------------------------------------------------------------------------------------------------------------------------------------------------------------------------------------------------------------------------------------------------------------------------------------------------------------------------------------------------------------------------------------------------------------------------------------|
|    | <p>H -4.89534400 -2.19575300 -0.49066400</p> <p>H -5.64731300 -0.55721600 -0.05492300</p> <p>C 0.40730500 1.19125300 0.15843200</p> <p>C 1.65787500 0.35072500 0.07271700</p> <p>C 1.88121700 -0.72946100 0.92177900</p> <p>C 2.65517400 0.71022500 -0.83056200</p> <p>C 3.07325600 -1.43857600 0.86612500</p> <p>H 1.11917800 -0.10157600 1.63796700</p> <p>C 3.83853500 -0.00785200 -0.90217000</p> <p>H 2.49483000 1.56111500 -1.48130400</p> <p>C 4.05202800 -1.08450800 -0.05091600</p> <p>H 3.23685300 -2.26955800 1.54115100</p> <p>H 4.59861800 0.27457400 -1.62020000</p> <p>H 4.97908500 -1.64192500 -0.10011900</p> <p>O 0.57366600 2.41848900 0.30521900</p>                                                                                                                                                                                                                                                                               | <p>C -2.72707700 0.31765100 0.06831100</p> <p>C -2.82061800 -0.76151900 -0.80708800</p> <p>C -3.78837400 0.59590000 0.92709500</p> <p>C -3.96116500 -1.54970500 -0.82345500</p> <p>H -2.00955200 -0.97649100 -1.49062800</p> <p>C -4.91680200 -0.20559100 0.92635000</p> <p>H -3.71543200 1.44132100 1.59902000</p> <p>C -5.00558500 -1.27818600 0.04802000</p> <p>H -4.03269300 -2.37790700 -1.51654700</p> <p>H -5.73047000 0.00653200 1.60793900</p> <p>H -5.89103000 -1.90112900 0.04236100</p> <p>O -1.70432900 2.42457300 0.26974800</p> <p>C 3.83135500 -0.75271700 -0.78343700</p> <p>H 4.28116900 -0.26718000 -1.64925100</p> <p>H 3.82915900 -1.83146700 -0.93999300</p> <p>C 4.68396700 -0.43021400 0.47785900</p> <p>O 5.31987300 0.64476600 0.45865900</p> <p>O 4.63687100 -1.26491900 1.40578300</p>                                                                                                                                                                                                                                                                        | <p>C -0.14601900 0.78771300 -0.29325200</p> <p>H 0.69806900 2.76330500 -0.39504900</p> <p>H -0.59591600 -1.32862600 -0.26992000</p> <p>H 3.99364600 -1.54559600 -1.48916000</p> <p>H 4.55562200 0.21332600 -1.53704700</p> <p>C -1.44899600 1.27321500 0.08583700</p> <p>C -2.61915400 0.32442900 0.10659500</p> <p>C -2.94658800 -0.46473400 -0.99217400</p> <p>C -3.43994300 0.29058100 1.23082400</p> <p>C -4.07242000 -1.27547000 -0.96617600</p> <p>H -2.32298200 -0.43627900 -1.87708400</p> <p>C -4.55260200 -0.53481500 1.26681000</p> <p>C -3.19664100 0.91521800 2.08139200</p> <p>H -4.87316700 -1.31838700 0.16586800</p> <p>H -4.32347600 -1.87529600 -1.83200700</p> <p>H -5.17422500 -0.56401800 2.15300800</p> <p>H -5.74671400 -1.95770300 0.18969900</p> <p>O -1.66873300 2.44713100 0.40534400</p>                                                                                                                                                                                                                                                                    |
| 9  |                                                                                                                                                                                                                                                                                                                                                                                                                                                                                                                                                                                                                                                                                                                                                                                                                                                                       |                                                                                                                                                                                                                                                                                                                                                                                                                                                                                                                                                                                                                                                                                                                                                                                                                                                                                                                                                                                                          |                                                                                                                                                                                                                                                                                                                                                                                                                                                                                                                                                                                                                                                                                                                                                                                                                                                                                                                                                                                                       |
|    | <p>-11</p> <p>C 2.16219300 0.00000600 -0.00004400</p> <p>C 1.37932800 1.22823900 0.00002600</p> <p>C 1.37933100 -1.22823100 -0.00002100</p> <p>O 0.02902700 1.22446500 0.00001500</p> <p>H 1.91341700 2.17193700 0.00005300</p> <p>C 0.02903000 -1.22446100 0.00008900</p> <p>H 1.91342700 -2.17192600 -0.00009000</p> <p>C -0.70233100 0.00000100 0.00007900</p> <p>H -0.52190600 2.15472500 0.00004800</p> <p>H -0.52190400 -2.15472100 0.00008500</p> <p>N -2.06942400 -0.00000200 0.00007000</p> <p>O -2.70014500 1.08524300 -0.00004100</p> <p>O -2.70014100 -1.08524900 -0.00010400</p> <p>C 3.51549900 -0.00000500 -0.00001800</p> <p>H 4.07654900 0.92680100 -0.00040900</p> <p>H 4.07649800 -0.92684000 0.00022600</p>                                                                                                                                                                                                                        | <p>-11</p> <p>C 2.43437800 -0.00023900 0.88413800</p> <p>C 3.33363700 0.00004800 -0.39053700</p> <p>O 4.56073800 0.00039500 -0.15927700</p> <p>O 2.77272900 -0.00011400 -1.50388900</p> <p>C 0.96261400 -0.00014500 0.62322200</p> <p>C 0.26148200 -1.19790700 0.48620700</p> <p>C 0.26145400 1.19768900 0.48697600</p> <p>C -1.09267800 -1.21023700 0.21360300</p> <p>H 0.78811000 -2.13812800 0.59306600</p> <p>C -1.09269200 1.21016000 0.21432400</p> <p>H 0.78804500 2.13785600 0.59450300</p> <p>C -1.75383000 -0.00000200 0.07898100</p> <p>H -1.63366200 -2.13872300 0.10689500</p> <p>H -1.63369800 2.13870200 0.10820700</p> <p>H 2.71533800 0.87611600 1.47146200</p> <p>H 2.71527600 -0.87695100 1.47096800</p> <p>N -3.18488700 0.00009000 -0.20862100</p> <p>O -3.75017400 -1.07094100 -0.32179200</p> <p>O -3.74971800 1.07119800 -0.32332100</p>                                                                                                                                                                                                                          | <p>-11</p> <p>C 2.37275800 0.00014300 1.31963000</p> <p>C 3.19022000 -0.00011700 -0.80650100</p> <p>O 3.28939500 1.14952600 -1.04600400</p> <p>O 3.28892300 -1.14981800 -1.04591400</p> <p>C 1.03268500 0.00010700 0.96505300</p> <p>C 0.30253100 -1.21714000 0.74191000</p> <p>C 0.30251900 1.21731000 0.74170900</p> <p>C -0.99082800 -1.21626200 0.31907200</p> <p>H 0.80757200 -2.15992800 0.91511600</p> <p>C -0.99084000 1.21635100 0.31887100</p> <p>H 0.80755200 2.16013200 0.91475700</p> <p>C -1.66629900 0.00002200 0.09272200</p> <p>H -1.51669800 -2.14667300 0.15688600</p> <p>H -1.51671800 2.14673000 0.15653600</p> <p>H 2.83832400 0.92285700 1.64233100</p> <p>H 2.83833200 -0.92250500 1.64250700</p> <p>N -2.99692600 -0.00002000 -0.33988500</p> <p>O -3.57642400 -1.07744800 -0.52919400</p> <p>O -3.57644000 1.07737000 -0.52935500</p>                                                                                                                                                                                                                          |
| 10 |                                                                                                                                                                                                                                                                                                                                                                                                                                                                                                                                                                                                                                                                                                                                                                                                                                                                      |                                                                                                                                                                                                                                                                                                                                                                                                                                                                                                                                                                                                                                                                                                                                                                                                                                                                                                                                                                                                         |                                                                                                                                                                                                                                                                                                                                                                                                                                                                                                                                                                                                                                                                                                                                                                                                                                                                                                                                                                                                      |
|    | <p>-11</p> <p>C 1.16568600 -0.80277800 0.00003800</p> <p>H 2.19558100 -0.45854400 -0.00028300</p> <p>H 0.98555900 -1.87063200 0.00013900</p> <p>C 1.02867700 0.09820200 0.00001600</p> <p>C -1.29650000 -0.45208100 0.00001800</p> <p>H -1.83102400 -0.08120500 0.87904000</p> <p>H -1.83104200 -0.08054300 -0.87879100</p> <p>O -1.33791000 -1.54265800 -0.00058100</p> <p>O -2.28957000 1.37169000 0.00000500</p>                                                                                                                                                                                                                                                                                                                                                                                                                                                                                                                                    | <p>-11</p> <p>C 1.16371200 0.24680300 0.08785800</p> <p>C 1.76792600 -1.10259300 -0.18808700</p> <p>H 2.50828600 -1.04096000 -0.98301700</p> <p>H 2.24699700 -1.46294000 0.72623600</p> <p>O 0.97883300 -1.81279600 -0.43923000</p> <p>O 1.64349300 1.26658600 -0.36636100</p> <p>C -0.07803300 0.26815800 0.93478600</p> <p>H -0.19323600 1.25669800 1.37316400</p> <p>H -0.01015800 -0.49369800 1.71153800</p> <p>C -1.31652900 -0.05670600 0.03152800</p> <p>O -1.96210300 0.92512900 -0.38124000</p> <p>O -1.52553700 -1.26425000 -0.20054900</p>                                                                                                                                                                                                                                                                                                                                                                                                                                                                                                                                     | <p>-11</p> <p>C 1.24338300 -0.15618200 0.17600100</p> <p>O 1.70927200 -1.20630100 -0.34714600</p> <p>O 0.35659300 -0.11140000 1.24667400</p> <p>H 0.13570400 -1.02674200 1.78613000</p> <p>H 0.15009300 0.82598000 1.74553700</p> <p>C 1.65797000 1.16639200 -0.46030500</p> <p>H 1.20737000 2.03369100 0.02284800</p> <p>H 2.74560600 1.26331500 -0.41698400</p> <p>H 1.37571200 1.16521700 -1.51625100</p> <p>C -1.62603200 -0.00720200 -0.12325200</p> <p>O -1.88453000 1.13534700 -0.04862600</p> <p>O -1.75048800 -1.13043500 -0.43622700</p>                                                                                                                                                                                                                                                                                                                                                                                                                                                                                                                                       |
| 11 |                                                                                                                                                                                                                                                                                                                                                                                                                                                                                                                                                                                                                                                                                                                                                                                                                                                                     |                                                                                                                                                                                                                                                                                                                                                                                                                                                                                                                                                                                                                                                                                                                                                                                                                                                                                                                                                                                                        |                                                                                                                                                                                                                                                                                                                                                                                                                                                                                                                                                                                                                                                                                                                                                                                                                                                                                                                                                                                                     |
|    | <p>-11</p> <p>C 0.17013600 -0.71231300 0.00012100</p> <p>C 1.13362200 0.26425100 0.00012300</p> <p>C -1.34356100 -0.38605800 0.00007200</p> <p>C -1.79801500 -1.37983500 0.00016500</p> <p>C -1.84081000 0.30973000 1.26909800</p> <p>H -2.93448500 0.34795900 1.28416300</p> <p>H -1.51426100 -0.23457300 2.15841900</p> <p>H -1.47483000 1.33349400 1.35634600</p> <p>C -1.84042100 0.30937400 -1.26931500</p> <p>H -1.51409800 -0.23555300 -2.15833800</p> <p>H -2.93407400 0.34822500 -1.28449900</p> <p>H -1.47378800 1.33286600 -1.35700800</p> <p>C 2.58716900 -0.12127300 0.00007300</p> <p>H 2.69311300 -1.20608400 0.00044900</p> <p>H 3.12213000 0.27278700 -0.87719500</p> <p>C 3.12231200 0.27343800 0.87693100</p> <p>C 0.91683900 1.75288700 -0.00009500</p> <p>H 1.38212600 2.22944100 -0.87632100</p> <p>H -0.12774600 2.05341800 0.00037600</p> <p>H 1.38304100 2.22979000 0.87543700</p> <p>O 0.42134300 -1.98312100 0.00007700</p> | <p>-11</p> <p>C 0.58159600 0.66892900 -0.50374400</p> <p>C -0.70598200 0.52078900 0.30247400</p> <p>C 1.72977400 -0.34144700 -0.39690400</p> <p>H 2.19285400 -0.29979800 -1.38592900</p> <p>C 2.76552500 0.19469000 0.60263600</p> <p>H 3.66850200 -0.41648900 0.55652500</p> <p>H 3.03926200 1.22468600 0.37126900</p> <p>H 2.38981000 0.15929200 1.62617600</p> <p>C 1.38204800 -1.79776400 -0.10533000</p> <p>H 0.69706100 -2.19882400 -0.85023200</p> <p>H 2.29914900 -2.39023000 -0.12543500</p> <p>H 0.92839300 -1.93111000 0.87664200</p> <p>C -1.61927300 1.72525700 0.05147100</p> <p>H -1.84794200 1.83414200 -1.00734700</p> <p>H -2.55389100 1.59018000 0.59957500</p> <p>H -1.15075200 2.64894200 0.39613700</p> <p>C -0.40295000 0.44083700 1.80103200</p> <p>H 0.18388200 -0.43491200 2.06974700</p> <p>H 0.13724600 1.33146600 2.13265500</p> <p>H -1.34205000 0.38445200 2.35023700</p> <p>C -1.47666500 -0.73578700 -0.22993600</p> <p>O 0.76035900 1.63346800 -1.21984300</p> <p>O -1.43935600 -0.89537900 -1.47100800</p> <p>O -2.09174800 -1.43244100 0.59832500</p> | <p>-11</p> <p>C 0.58885000 0.59183600 -0.63298000</p> <p>C -0.27233000 0.92218600 0.40816300</p> <p>C 1.74102900 -0.42683500 -0.47098800</p> <p>H 2.15434700 -0.48092800 -1.48153900</p> <p>C 2.86850500 0.07733900 0.43301800</p> <p>H 3.74263000 -0.57507600 0.35303700</p> <p>H 3.17630300 1.08465100 0.14249600</p> <p>H 2.57462900 0.10959100 1.48251700</p> <p>C 1.30680100 -1.84633000 -0.10537500</p> <p>O 0.56502300 -2.21820200 -0.81610800</p> <p>H 2.16413400 -2.5207400 -0.13576500</p> <p>H 0.86994700 -1.90783200 0.89135700</p> <p>C -1.25591200 2.04309000 0.18290400</p> <p>H -1.59134500 2.06987000 -0.85376700</p> <p>H -2.13622700 1.93650500 0.82757900</p> <p>H -0.82658400 3.03238100 0.40714200</p> <p>C -0.01537500 0.62749800 1.86216400</p> <p>H 0.52949900 -0.29832200 2.03476000</p> <p>H 0.55076400 1.43048600 2.35789900</p> <p>H -0.96140000 0.53597000 2.40565300</p> <p>C -1.92030900 -0.94166800 -1.02703500</p> <p>O 0.49393200 1.08854400 -1.80322500</p> <p>O -2.15058700 -0.73677600 -1.25444500</p> <p>O -1.97575400 -1.41135700 0.94335900</p> |
| 12 |                                                                                                                                                                                                                                                                                                                                                                                                                                                                                                                                                                                                                                                                                                                                                                                                                                                                     |                                                                                                                                                                                                                                                                                                                                                                                                                                                                                                                                                                                                                                                                                                                                                                                                                                                                                                                                                                                                        |                                                                                                                                                                                                                                                                                                                                                                                                                                                                                                                                                                                                                                                                                                                                                                                                                                                                                                                                                                                                     |

|    |                                                                                                                                                                                                                                                                                                                                                                                                                                                                                                                                                                                                                                                                                                                                                                             |                                                                                                                                                                                                                                                                                                                                                                                                                                                                                                                                                                                                                                                                                                                                                                                                                                                                                                                     |                                                                                                                                                                                                                                                                                                                                                                                                                                                                                                                                                                                                                                                                                                                                                                                                                                                                                                                    |
|----|-----------------------------------------------------------------------------------------------------------------------------------------------------------------------------------------------------------------------------------------------------------------------------------------------------------------------------------------------------------------------------------------------------------------------------------------------------------------------------------------------------------------------------------------------------------------------------------------------------------------------------------------------------------------------------------------------------------------------------------------------------------------------------|---------------------------------------------------------------------------------------------------------------------------------------------------------------------------------------------------------------------------------------------------------------------------------------------------------------------------------------------------------------------------------------------------------------------------------------------------------------------------------------------------------------------------------------------------------------------------------------------------------------------------------------------------------------------------------------------------------------------------------------------------------------------------------------------------------------------------------------------------------------------------------------------------------------------|--------------------------------------------------------------------------------------------------------------------------------------------------------------------------------------------------------------------------------------------------------------------------------------------------------------------------------------------------------------------------------------------------------------------------------------------------------------------------------------------------------------------------------------------------------------------------------------------------------------------------------------------------------------------------------------------------------------------------------------------------------------------------------------------------------------------------------------------------------------------------------------------------------------------|
|    | <p>-11</p> <p>C -1.49321400 0.10788300 -0.00012000</p> <p>C -0.44116400 -1.03778400 0.00005300</p> <p>H -2.14364700 0.11084200 0.88401200</p> <p>H -2.14263300 0.11073900 -0.88511600</p> <p>H -0.45074300 -1.67483800 0.89012300</p> <p>H -0.45140500 -1.67709400 -0.88828600</p> <p>C 0.63455900 0.07064300 -0.00017600</p> <p>O 1.89460000 -0.03218400 -0.00007200</p> <p>C -0.31746400 1.06548500 0.00019000</p> <p>H -0.26467900 2.15046200 0.00016600</p>                                                                                                                                                                                                                                                                                                             | <p>-11</p> <p>C 0.81207900 -1.40066800 0.53199000</p> <p>C -0.00838300 -0.10542200 0.72387400</p> <p>C 1.74090400 -0.67932600 -0.47844400</p> <p>H 1.33446700 -1.71016600 1.43572500</p> <p>H 0.23729000 -2.22832200 0.12602000</p> <p>H -0.13865800 0.26035500 1.74239700</p> <p>H 2.81883500 -0.72919000 -0.32570900</p> <p>H 1.51510200 -0.91951800 -1.51970000</p> <p>C 1.07502800 0.62012200 -0.05683400</p> <p>O 1.35277500 1.77821000 -0.21823300</p> <p>C -1.39137400 -0.01309700 0.00060100</p> <p>O -1.74610700 -0.98967100 -0.68444100</p> <p>O -1.99873900 1.06110900 0.17944200</p>                                                                                                                                                                                                                                                                                                                    | <p>-11</p> <p>C 1.14631900 -1.36291900 0.51077100</p> <p>C 0.46159200 -0.10088100 0.99650100</p> <p>C 1.68521500 -0.51914900 -0.67781200</p> <p>H 1.94232800 -1.76110000 1.14953400</p> <p>H 0.49252800 -2.19192500 0.22032300</p> <p>H 0.00287000 0.13800100 1.95069900</p> <p>H 2.77419500 -0.46239400 -0.75569400</p> <p>H 1.27189700 -0.78035600 -1.65569200</p> <p>C 1.02838200 0.69923900 0.00296600</p> <p>O 1.06706800 1.91046200 -0.30149600</p> <p>C -1.72299900 -0.11094200 -0.09984700</p> <p>O -1.69381800 -1.15508900 -0.62947000</p> <p>O -2.13260800 0.92283800 0.26788600</p>                                                                                                                                                                                                                                                                                                                     |
| 13 |                                                                                                                                                                                                                                                                                                                                                                                                                                                                                                                                                                                                                                                                                                                                                                             |                                                                                                                                                                                                                                                                                                                                                                                                                                                                                                                                                                                                                                                                                                                                                                                                                                                                                                                     |                                                                                                                                                                                                                                                                                                                                                                                                                                                                                                                                                                                                                                                                                                                                                                                                                                                                                                                    |
|    | <p>-11</p> <p>C -1.74296000 -0.04861700 0.35886700</p> <p>C -1.13520700 1.26611700 -0.12002700</p> <p>C 0.44082200 -1.24289800 0.07087400</p> <p>C -1.03721900 -1.22214500 -0.30633200</p> <p>H -1.51417800 1.46745800 -1.13524200</p> <p>H -1.52307100 2.08608000 0.49654800</p> <p>H -1.62374600 -0.13173100 1.44534800</p> <p>H -2.81651900 -0.07326000 0.15048200</p> <p>H 0.99246800 -1.93051000 -0.57708000</p> <p>H 0.55863200 -1.62952900 1.09091900</p> <p>H -1.13640800 -1.12102200 -1.39331900</p> <p>H -1.51359600 -2.16884700 -0.03513900</p> <p>C 1.14398800 0.11665900 0.00757000</p> <p>O 2.42912400 0.07738800 0.06284700</p> <p>C 0.37317700 1.24425600 -0.07951300</p> <p>H 0.88782100 2.20207000 -0.13392200</p>                                        | <p>-11</p> <p>C -1.88759400 -1.35784700 -0.23459400</p> <p>C -0.41019700 -1.42980700 0.13280400</p> <p>C 0.38785700 -2.23896000 -0.42094000</p> <p>C -1.74915600 1.15778100 -0.27925900</p> <p>C -2.50976200 -0.05819900 0.26004300</p> <p>H -0.29575100 -1.44813400 1.21926300</p> <p>H 0.03249700 -2.35373900 -0.24445100</p> <p>H -1.99975700 -1.42427200 -1.32211100</p> <p>H -2.41845100 -2.21175700 0.19171700</p> <p>H -2.12725000 2.09126500 0.13690800</p> <p>H -1.86855700 1.19842700 -1.36761900</p> <p>H -2.48682400 -0.03886200 1.35402600</p> <p>H -3.55790800 0.00976600 -0.03619700</p> <p>H 0.30410200 -0.25356600 -1.51407500</p> <p>C 1.89093700 -0.27239700 -0.06181700</p> <p>C -0.26669700 1.06245600 0.00221700</p> <p>O 2.19426000 -0.69703100 1.07354300</p> <p>O 2.67803000 1.12922200 -0.94743900</p> <p>O 0.33840700 1.97439900 0.52287300</p>                                          | <p>-11</p> <p>C 2.15672000 -0.87833800 0.28542400</p> <p>C 0.89673900 -1.09084100 1.12170300</p> <p>C -0.04057400 0.09193100 1.07600700</p> <p>C 1.17195900 1.09988600 -0.87210000</p> <p>C 1.79024300 -0.28012200 -1.06588400</p> <p>H 0.39721700 -1.99971300 0.76056400</p> <p>H 1.18304900 -1.30146300 2.15833400</p> <p>H 2.83533500 -0.19108400 0.80384400</p> <p>H 2.69281200 -1.82310200 0.16070300</p> <p>H 0.68132300 1.44329300 -1.78752400</p> <p>H 1.95829900 1.83285100 -0.65705500</p> <p>H 1.07335800 -0.94116200 -1.56289900</p> <p>H 2.66657000 -0.21370900 -1.71638900</p> <p>H -0.70860700 0.22523700 1.92372300</p> <p>C -1.95726200 -0.68354800 -0.27926900</p> <p>C 0.15113900 1.20007900 0.26228600</p> <p>O -1.53208100 -1.70993200 -0.65556400</p> <p>O -2.72632400 0.18384000 -0.11307200</p> <p>O -0.46573800 2.30283800 0.36209900</p>                                                 |
| 14 |                                                                                                                                                                                                                                                                                                                                                                                                                                                                                                                                                                                                                                                                                                                                                                             |                                                                                                                                                                                                                                                                                                                                                                                                                                                                                                                                                                                                                                                                                                                                                                                                                                                                                                                     |                                                                                                                                                                                                                                                                                                                                                                                                                                                                                                                                                                                                                                                                                                                                                                                                                                                                                                                    |
|    | <p>-11</p> <p>C -1.78762300 -0.07224400 -0.00080800</p> <p>C -0.26313500 0.01484500 -0.00065100</p> <p>C 0.46375700 -1.17406000 0.00299800</p> <p>C 0.45865100 1.21104800 -0.00409500</p> <p>C 1.85207900 -1.17750600 0.00395500</p> <p>H -0.09304300 -2.10168300 0.00518500</p> <p>C 1.84513300 1.21559500 -0.00337100</p> <p>H -0.06104800 2.16001200 -0.00786000</p> <p>C 2.55206000 0.01955200 0.00083800</p> <p>H 2.38875500 -2.11908000 0.00710900</p> <p>C 2.37765600 2.15931200 -0.00618300</p> <p>H 3.63515400 0.02358700 0.00148600</p> <p>O -2.27692800 -1.25064400 -0.00738000</p> <p>C -2.51565500 1.09119700 0.00740800</p> <p>H -3.59910900 1.03975500 0.00769900</p> <p>H -2.06454500 2.07269400 0.01395800</p>                                             | <p>-11</p> <p>C -0.58657400 1.15477200 0.35199000</p> <p>C 0.69450400 0.39342700 0.18705000</p> <p>C 1.85002200 1.08936600 -0.16281400</p> <p>C 0.76453400 -0.98577600 0.37320300</p> <p>C 3.05252900 0.42306700 -0.32129700</p> <p>H 1.79015000 2.16011200 -0.30675900</p> <p>C 1.96728500 -1.65533000 0.20828500</p> <p>H -0.12085900 -1.54945400 0.63700400</p> <p>C 3.11252400 -0.95243500 -0.13648600</p> <p>H 3.94505900 0.97394300 -0.58938900</p> <p>H 2.00989000 -2.72768000 0.34926300</p> <p>H 4.05210900 -1.47576800 -0.26184700</p> <p>O -0.62879900 2.34165600 0.09290600</p> <p>H -1.79905800 0.41702200 0.84378900</p> <p>H -1.56715200 -0.17092400 1.73165700</p> <p>H -2.55529700 1.15691600 1.10984600</p> <p>C -2.41762500 -0.51270400 -0.24375000</p> <p>O -2.25224200 -0.16049800 -1.42920600</p> <p>O -3.04180300 -1.50561000 0.17760200</p>                                                 | <p>-11</p> <p>C -3.06578500 0.53258400 -0.43357700</p> <p>C -1.83887400 1.13609500 -0.19983800</p> <p>C -0.73771700 0.39205600 0.21814200</p> <p>C -0.89666800 -0.98433700 0.37902800</p> <p>C -2.11831700 -1.59450300 0.13416800</p> <p>H -3.21055300 -0.83794700 -0.26851300</p> <p>H -3.91136200 1.13267900 -0.74784100</p> <p>H -1.71453300 2.20229000 -0.33924100</p> <p>H -0.05158800 -1.59063900 0.67771600</p> <p>H -2.21662200 -2.66674900 0.25396600</p> <p>H -4.16505700 -1.31392000 -0.46553200</p> <p>C 0.57730500 1.12059000 0.46338700</p> <p>C 1.52196800 0.49334300 1.27711000</p> <p>H 2.39473800 1.06483900 1.57305600</p> <p>H 1.25284100 -0.34952700 1.89741800</p> <p>O 0.73415400 2.22038700 -0.11393100</p> <p>C 2.68907600 -0.71883200 -0.40435500</p> <p>C 3.12827200 0.14638400 -1.06317600</p> <p>O 2.49869500 -1.82453100 -0.05437400</p>                                             |
| 15 |                                                                                                                                                                                                                                                                                                                                                                                                                                                                                                                                                                                                                                                                                                                                                                             |                                                                                                                                                                                                                                                                                                                                                                                                                                                                                                                                                                                                                                                                                                                                                                                                                                                                                                                     |                                                                                                                                                                                                                                                                                                                                                                                                                                                                                                                                                                                                                                                                                                                                                                                                                                                                                                                    |
|    | <p>-11</p> <p>C -2.52859800 -0.06263500 -0.02366000</p> <p>C -1.01005300 0.00895600 -0.01124800</p> <p>C -0.29233400 -1.17658700 0.14760200</p> <p>C -0.29130900 1.19474200 -0.17738000</p> <p>C 1.08892100 -1.18724900 0.16702800</p> <p>H -0.84773500 -2.09863600 0.25180600</p> <p>C 1.09021100 1.20364800 -0.17124400</p> <p>H -0.81942500 2.12574400 -0.33391100</p> <p>C 1.78823000 0.00867200 0.00625600</p> <p>H 1.63028200 -2.11471200 0.30159600</p> <p>H 1.63260600 2.12962400 -0.31069200</p> <p>O -3.02704500 -1.18804400 -0.35634200</p> <p>C -3.21847100 1.06311200 0.34619500</p> <p>H -4.30235200 1.04619800 0.37188300</p> <p>C -2.72187600 1.97393100 0.64992100</p> <p>C 3.21785000 0.00949700 0.01334000</p> <p>N 4.36831200 0.00989400 0.01982800</p> | <p>-11</p> <p>C 1.47846100 1.13233200 -0.31758000</p> <p>C 0.05849100 0.64106100 -0.21480800</p> <p>C -0.93336300 1.54702700 0.15113100</p> <p>C -0.28634500 -0.68211300 -0.47662200</p> <p>C -2.25055000 1.14745000 0.25390800</p> <p>H -0.65645900 2.57238400 0.35412100</p> <p>C -1.60085700 -1.09844400 -0.37403000</p> <p>C 0.46862300 -1.40482200 -0.75402400</p> <p>C -2.58310300 -0.18073800 -0.01017600</p> <p>H -3.02002100 1.85293100 0.53607600</p> <p>H -1.86688900 -2.12732400 -0.57341800</p> <p>O 1.73966100 2.27662600 -0.01078600</p> <p>C 2.53125300 0.17973800 -0.79895600</p> <p>H 2.22040100 -0.32378000 -1.71447600</p> <p>H 3.43238800 0.75460100 -1.01531800</p> <p>C 2.89866300 -0.88655600 0.27842400</p> <p>O 2.64732500 -0.58212600 1.46217600</p> <p>C 3.42917800 -1.92860400 -0.14826900</p> <p>C -3.94777300 -0.60547300 0.09358400</p> <p>N -5.04237300 -0.94526700 0.17611700</p> | <p>-11</p> <p>C 2.24993000 1.15988900 -0.35072100</p> <p>C 0.92545300 1.52215000 -0.19816100</p> <p>C -0.02323900 0.61719800 0.27419900</p> <p>C 0.38835300 -0.68151200 0.57526400</p> <p>C 1.70700200 -1.06466200 0.41959600</p> <p>H 2.97852100 1.87472900 -0.70991900</p> <p>H 0.59928200 2.52285000 -0.44624700</p> <p>H -0.33178500 -1.41239800 0.91516500</p> <p>H 2.01371100 -2.07662800 0.64874100</p> <p>C -1.45835300 1.09710600 0.42392300</p> <p>C -2.32411800 0.33906900 1.20830500</p> <p>H -1.94552200 -0.41645600 1.88135200</p> <p>H -3.29310100 0.76327300 1.44403500</p> <p>O -1.76733400 2.14373400 -0.19892800</p> <p>C -3.13077300 -1.08937800 -0.45178600</p> <p>O -2.64346600 -2.11625300 -0.14606800</p> <p>O -3.80926900 -0.37066000 -1.08698900</p> <p>C 2.64489700 -0.14055400 -0.04009200</p> <p>C 4.01273000 -0.52938200 -0.19717900</p> <p>N 5.11259200 -0.84135400 -0.32247800</p> |



|                                                                                                                                                                                                                                                                                                                                                                                                                                                                                                                                                                                                                                                                                                                                                                                                                                                                                                                                                                                                                                                                                                                                                                                   |  |                                                                                                                                                                                                                                                                                                                                                                                                                                                                                                                                                                                                                                                                                                                                                                                                                                                                                                                                                                                                                                                                                                                                                                                                                                                                                                                                  |                                                                                                                                                                                                                                                                                                                                                                                                                                                                                                                                                                                                                                                                                                                                                                                                                                                                                                                                                                                                                                                                                                                                                                                                                                                                                                                               |
|-----------------------------------------------------------------------------------------------------------------------------------------------------------------------------------------------------------------------------------------------------------------------------------------------------------------------------------------------------------------------------------------------------------------------------------------------------------------------------------------------------------------------------------------------------------------------------------------------------------------------------------------------------------------------------------------------------------------------------------------------------------------------------------------------------------------------------------------------------------------------------------------------------------------------------------------------------------------------------------------------------------------------------------------------------------------------------------------------------------------------------------------------------------------------------------|--|----------------------------------------------------------------------------------------------------------------------------------------------------------------------------------------------------------------------------------------------------------------------------------------------------------------------------------------------------------------------------------------------------------------------------------------------------------------------------------------------------------------------------------------------------------------------------------------------------------------------------------------------------------------------------------------------------------------------------------------------------------------------------------------------------------------------------------------------------------------------------------------------------------------------------------------------------------------------------------------------------------------------------------------------------------------------------------------------------------------------------------------------------------------------------------------------------------------------------------------------------------------------------------------------------------------------------------|-------------------------------------------------------------------------------------------------------------------------------------------------------------------------------------------------------------------------------------------------------------------------------------------------------------------------------------------------------------------------------------------------------------------------------------------------------------------------------------------------------------------------------------------------------------------------------------------------------------------------------------------------------------------------------------------------------------------------------------------------------------------------------------------------------------------------------------------------------------------------------------------------------------------------------------------------------------------------------------------------------------------------------------------------------------------------------------------------------------------------------------------------------------------------------------------------------------------------------------------------------------------------------------------------------------------------------|
| <p><b>16</b></p> 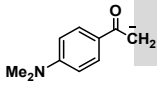                                                                                                                                                                                                                                                                                                                                                                                                                                                                                                                                                                                                                                                                                                                                                                                                                                                                                                                                                                                                                                                                                |  |                                                                                                                                                                                                                                                                                                                                                                                                                                                                                                                                                                                                                                                                                                                                                                                                                                                                                                                                                                                                                                                                                                                                                                                                                                                 |                                                                                                                                                                                                                                                                                                                                                                                                                                                                                                                                                                                                                                                                                                                                                                                                                                                                                                                                                                                                                                                                                                                                                                                                                                            |
| <p>-11</p> <p>C -3.04922700 -0.05854200 0.01364400</p> <p>C -1.53216000 0.00547000 -0.02691000</p> <p>C -0.79679500 -1.17342700 0.04542300</p> <p>C -0.79592400 1.18372700 -0.13785500</p> <p>C 0.58828300 -1.19078800 0.02407100</p> <p>C -1.33976700 -2.10684900 0.12510500</p> <p>C 0.58816700 1.19232100 -0.16850400</p> <p>H -1.31091500 2.13348300 -0.21676100</p> <p>H 1.32498100 -0.00196900 -0.09560200</p> <p>H 1.09323500 -2.14330700 0.09982000</p> <p>H 1.09376900 2.14317700 -0.25820900</p> <p>O -3.56999600 -1.19476100 -0.25118300</p> <p>C -3.74445700 1.08118000 0.34230300</p> <p>H -4.82853300 1.05874100 0.37500000</p> <p>H -3.25320800 2.00959700 0.59914600</p> <p>C 3.41404200 -1.21628000 0.19703600</p> <p>C 3.21605600 -1.53583600 1.22930800</p> <p>H 3.14400600 -2.03815100 -0.46857000</p> <p>H 4.48347500 -1.04907200 0.08997600</p> <p>C 3.41334300 1.24363400 0.02882500</p> <p>H 3.15445000 1.96330000 -0.74996900</p> <p>H 3.20413700 1.70654300 1.00278500</p> <p>H 4.48345700 1.06154700 -0.04026500</p> <p>N 2.70832700 -0.00529000 -0.15892700</p>                                                                                       |  | <p>-11</p> <p>C 2.01392000 1.12746600 -0.37468800</p> <p>C 0.59729100 0.71151900 -0.27086200</p> <p>C -0.38082000 1.65378500 0.05398300</p> <p>C 0.17822700 -0.60410200 -0.47788900</p> <p>C -1.70920200 1.31436600 0.16642000</p> <p>H -0.07714900 2.67965600 0.22031300</p> <p>C -1.14633100 -0.96865200 -0.36515200</p> <p>H 0.90036200 -1.37375000 -0.72102800</p> <p>C -2.13555900 -0.01671600 -0.04016700</p> <p>H -2.42453600 2.08345500 0.41787100</p> <p>H -1.41517500 -2.00150100 -0.52954000</p> <p>C 2.34906100 2.27762300 -0.13844300</p> <p>C 3.03429800 0.09560900 -0.78156200</p> <p>H 2.72322600 -0.42056900 -1.68956300</p> <p>H 3.96957100 0.61928200 -0.98516000</p> <p>C 3.31580800 -0.95081500 0.33580000</p> <p>O 3.34066500 -0.51541800 1.50525400</p> <p>O 3.51663800 -2.12325800 -0.04125900</p> <p>C -3.85337900 -1.73961100 -0.12755000</p> <p>H -3.61001100 -2.09185800 -1.13441800</p> <p>H -3.37682600 -2.41111200 0.59333700</p> <p>H -4.92916700 -1.81533400 0.00299600</p> <p>C -4.43893000 0.62896500 0.41587200</p> <p>H -4.24104700 1.07682700 1.39459600</p> <p>H -4.48063700 1.43266600 -0.32531900</p> <p>H -5.41700400 0.15778600 0.45396500</p> <p>N -3.44635100 -0.36543000 0.07032800</p>                                                                                            | <p>-11</p> <p>C 1.70428300 -1.29520800 -0.24078400</p> <p>C 0.36071900 -1.59429600 -0.09944300</p> <p>C -0.56305000 -0.67069700 0.38030100</p> <p>C -0.07112400 0.95461900 0.69583600</p> <p>C 1.26652900 0.91991800 0.55587300</p> <p>C 2.20149000 -0.02570300 0.09893500</p> <p>C 2.36751500 -2.05959900 -0.61965600</p> <p>H 0.00108100 -2.57851500 -0.37197700</p> <p>H -0.74860900 1.36565100 1.03930800</p> <p>H 1.58073700 1.92396400 0.80240800</p> <p>C -2.01470800 -1.08046400 0.51433200</p> <p>C -2.88201200 -0.25213800 1.22173100</p> <p>H -3.88368400 -0.61479300 1.42395500</p> <p>H -2.51086300 0.54215500 1.85331100</p> <p>O -2.35783600 -2.15479700 -0.05480300</p> <p>C -3.55071000 1.15353900 -0.62869800</p> <p>O -4.22503100 0.41363200 -1.23782400</p> <p>O -3.01746900 2.15857200 -0.34207100</p> <p>N 3.54422200 0.27697600 -0.00387300</p> <p>C 3.96239500 1.65666200 0.10710000</p> <p>H 3.69647700 2.07109700 1.08153600</p> <p>H 5.04481400 1.70848900 0.01538100</p> <p>C 3.51971000 2.29712000 -0.66724400</p> <p>C 4.41213500 -0.62745000 -0.72486800</p> <p>H 4.11291300 -0.75467100 -1.77363500</p> <p>H 5.42735200 -0.23824700 -0.70408600</p> <p>H 4.43001600 -1.61355900 -0.25649600</p>                                                                                               |
| <p><b>17</b></p>                                                                                                                                                                                                                                                                                                                                                                                                                                                                                                                                                                                                                                                                                                                                                                                                                                                                                                                                                                                                                                                                                 |  |                                                                                                                                                                                                                                                                                                                                                                                                                                                                                                                                                                                                                                                                                                                                                                                                                                                                                                                                                                                                                                                                                                                                                                                                                                                 |                                                                                                                                                                                                                                                                                                                                                                                                                                                                                                                                                                                                                                                                                                                                                                                                                                                                                                                                                                                                                                                                                                                                                                                                                                            |
| <p>-11</p> <p>C -2.73442200 0.96306600 0.26805000</p> <p>C -1.36566300 1.16828500 0.19250700</p> <p>C -0.49485200 1.00848100 -0.04934200</p> <p>C -1.03200200 -1.16400700 -0.23278600</p> <p>C -2.40253500 -1.37155400 -0.17011100</p> <p>C -3.25841700 -0.30968900 0.08564200</p> <p>H -3.39512900 1.79798300 0.46701800</p> <p>H -0.95030800 2.15946500 0.32016000</p> <p>H -0.37930800 -2.00033200 -0.44884900</p> <p>H -2.80317800 -2.36549900 -0.32674000</p> <p>H -4.32783500 -0.47205600 0.13702200</p> <p>C 0.98852200 0.39724600 -0.12747200</p> <p>C 1.86291400 -0.63823100 0.22857500</p> <p>O 1.50686000 -1.59307400 0.58381900</p> <p>H 1.33897200 1.54281600 -0.48668700</p> <p>C 3.24603700 -0.44925400 1.17554700</p> <p>N 4.39709000 -0.29929500 0.13391400</p>                                                                                                                                                                                                                                                                                                                                                                                                  |  | <p>-11</p> <p>C -3.34652100 -0.85438100 0.34662500</p> <p>C -2.02434700 -1.25756200 0.37622200</p> <p>C -1.01740400 -0.41446300 -0.09368400</p> <p>C -1.35707500 0.84224200 -0.59219200</p> <p>C -2.68312500 1.24540700 -0.61902600</p> <p>C -3.67781400 0.39919800 -0.15268500</p> <p>H -4.12141600 -1.51534400 0.71275900</p> <p>H -1.75319400 -2.23040000 0.76381000</p> <p>H -0.59455000 1.52343500 -0.94566200</p> <p>H -2.93869100 2.22356300 -1.00503200</p> <p>H -4.71278300 0.71612500 -0.17660900</p> <p>C 0.39014800 -0.90706500 -0.03925200</p> <p>C 1.48054200 0.02670500 -0.54032100</p> <p>H 1.20626000 0.46944300 -1.49621700</p> <p>O 0.66005800 -1.99791100 0.40931500</p> <p>C 1.69697800 1.22037900 0.52461500</p> <p>O 1.65380100 2.35715100 0.04391300</p> <p>O 1.87748100 0.83689500 1.68532900</p> <p>C 2.73468500 -0.68079400 -0.71075700</p> <p>N 3.74389600 -1.21058000 -0.85125300</p>                                                                                                                                                                                                                                                                                                                                                                                                               | <p>-11</p> <p>C -3.39093000 -0.82762100 0.37087300</p> <p>C -2.06545200 -1.22565200 0.42268700</p> <p>C -1.05422800 -0.40076100 -0.06479400</p> <p>C -1.39798300 0.83960900 -0.59914500</p> <p>C -2.72390800 1.24360500 -0.64288500</p> <p>C -3.72371200 0.41041400 -0.16226500</p> <p>H -4.16644300 -1.48264400 0.74760100</p> <p>H -1.79419000 -2.18531000 0.84221300</p> <p>H -0.63192800 1.51051900 -0.96399400</p> <p>H -2.97596400 2.21354300 -1.05258500</p> <p>H -4.75889800 0.72555800 -0.20121000</p> <p>C 0.36652700 -0.89542600 0.02082300</p> <p>C 1.37691700 -0.18338700 -0.72256000</p> <p>H 1.07098700 0.40298600 -1.57782100</p> <p>O 0.62445500 -1.85437700 0.74695200</p> <p>C 1.88234900 1.39019000 0.63273500</p> <p>O 1.63702700 2.38201800 0.02842900</p> <p>C 2.28112400 0.86060900 1.61462300</p> <p>C 2.62069900 -0.83632400 -0.89034000</p> <p>N 3.65341800 -1.33978900 -1.01508000</p>                                                                                                                                                                                                                                                                                                                                                                                                            |
| <p><b>18</b></p>                                                                                                                                                                                                                                                                                                                                                                                                                                                                                                                                                                                                                                                                                                                                                                                                                                                                                                                                                                                                                                                                               |  |                                                                                                                                                                                                                                                                                                                                                                                                                                                                                                                                                                                                                                                                                                                                                                                                                                                                                                                                                                                                                                                                                                                                                                                                                                               |                                                                                                                                                                                                                                                                                                                                                                                                                                                                                                                                                                                                                                                                                                                                                                                                                                                                                                                                                                                                                                                                                                                                                                                                                                          |
| <p>-11</p> <p>C -4.22550600 -0.74277100 0.46481700</p> <p>C -2.88191200 -1.07685600 0.38641700</p> <p>C -1.93133600 -0.15556500 -0.05168500</p> <p>C -2.37754500 1.10894400 -0.43685400</p> <p>C -3.72238800 1.44501200 -0.37158200</p> <p>C -4.65326300 0.52256800 0.08584100</p> <p>H -4.94281700 -1.47293900 0.82038400</p> <p>H -2.54697400 -2.06806500 0.66427100</p> <p>H -1.66889600 1.83645900 -0.81227100</p> <p>H -4.04523000 2.43017100 -0.68639700</p> <p>H -5.70270900 0.78482900 0.13876900</p> <p>C -0.47638000 -0.58652000 -0.11582600</p> <p>C 0.48045100 0.40207800 0.06905000</p> <p>H 0.13048800 1.40697300 0.27091400</p> <p>O -0.26720600 -1.82128400 -0.30816500</p> <p>C 1.91536500 0.24294200 0.05235000</p> <p>C 2.7827200 1.36562900 0.28784900</p> <p>C 2.58030000 -0.97715500 -0.19022300</p> <p>C 4.11797500 1.28031500 0.28231300</p> <p>C 2.26721900 2.32469600 0.47829800</p> <p>C 3.96538300 -1.05514800 -0.19475700</p> <p>H 1.97998200 -1.85642000 -0.37354300</p> <p>C 4.75181400 0.06492400 0.04021900</p> <p>H 4.70806700 2.17081900 0.46842500</p> <p>H 4.43869800 -2.01223900 -0.38622500</p> <p>H 5.83243200 -0.00439800 0.03512300</p> |  | <p>-11</p> <p>C 4.20213000 -1.36449600 0.19367600</p> <p>C 2.84307800 -1.46558200 0.43369700</p> <p>C 1.96837600 -0.47111600 -0.00077900</p> <p>C 2.48330600 0.63134300 -0.68064500</p> <p>C 3.84546400 0.73579600 -0.91704300</p> <p>C 4.70633300 -0.26145600 -0.48314600</p> <p>H 4.87069100 -2.14491800 0.53413500</p> <p>H 2.44009700 -2.31952000 0.96180400</p> <p>H 1.83093000 1.42449400 -1.02115000</p> <p>H 4.23460000 1.59882300 -1.44180800</p> <p>H 5.76946700 -0.17957200 -0.67134900</p> <p>C 0.50306000 -0.63780500 0.28462200</p> <p>O 0.11881400 -1.58517700 0.93597300</p> <p>C -1.88977800 -0.02897700 -0.26565100</p> <p>C -2.54420900 -0.28410100 -1.46676100</p> <p>C -2.60462000 -0.17049500 0.92231000</p> <p>C -3.87769700 -0.67124400 -1.48703500</p> <p>H -2.00426300 -0.17693500 -2.40068400</p> <p>C -3.93544600 -0.55680500 0.90609200</p> <p>H -2.10859500 0.03209500 1.86238300</p> <p>C -4.57842200 -0.80975400 -0.29902000</p> <p>H -4.36769100 -0.86264300 -2.43378000</p> <p>H -4.47523500 -0.66017800 1.83951500</p> <p>H -5.61867100 -1.11032800 -0.31012900</p> <p>C -0.44596100 0.40577700 -0.27419300</p> <p>H -0.15885500 0.60448700 -1.30658200</p> <p>C -0.27957200 1.75784400 0.51494800</p> <p>O -0.01699200 1.65860700 1.72920100</p> <p>O -0.45040700 2.79414700 -0.15252100</p> | <p>-11</p> <p>C 4.29460600 -1.27573400 -0.17723200</p> <p>C 2.95198600 -1.45895400 0.11520500</p> <p>C 2.02694700 -0.43521500 -0.07935000</p> <p>C 2.48808800 0.78894100 -0.56289400</p> <p>C 3.83323400 0.98043500 -0.84291300</p> <p>C 4.74152800 -0.05229600 -0.65696200</p> <p>H 4.99501900 -2.08853100 -0.02834400</p> <p>H 2.59790000 -2.40541900 0.50257700</p> <p>H 1.79945000 1.61148000 -0.70360200</p> <p>H 4.17341300 1.94263000 -1.20575900</p> <p>H 5.79054800 0.09694000 -0.88061900</p> <p>C 0.57459600 -0.71392300 0.26057900</p> <p>C -0.40571600 0.10604300 -0.34687400</p> <p>H -0.05947700 0.72161700 -1.16603700</p> <p>O 0.34927200 -1.63637700 1.06733100</p> <p>C -0.43167600 1.75723500 1.17508900</p> <p>O -0.22551900 2.71287600 0.50844300</p> <p>O -0.67507700 1.23150800 2.20239600</p> <p>C -1.83553800 -0.18257200 -0.39592100</p> <p>C -2.62566600 0.48445900 -1.34877700</p> <p>C -2.49698000 -1.06940100 0.46908300</p> <p>C -3.99130000 0.28062700 -1.43673100</p> <p>H -2.14645000 1.17747100 -2.03216500</p> <p>C -3.86644000 -1.27313700 0.37515900</p> <p>H -1.91590900 -1.59610800 1.21077500</p> <p>H -4.62736000 -0.60387500 -0.57304900</p> <p>H -4.56439500 0.81395600 -2.18634100</p> <p>H -4.34562100 -1.96645600 1.05729500</p> <p>H -5.69574000 -0.76722700 -0.63982700</p> |

|                                                                                                                                                                                                                                                                                                                                                                                                                                                                                                                                                                                                                                                                                                                                                                                                                                                                          |                                                                                                                                                                                                                                                                                                                                                                                                                                                                                                                                                                                                                                                                                                                                                                                                                                                                                                                                                                                                             |                                                                                                                                                                                                                                                                                                                                                                                                                                                                                                                                                                                                                                                                                                                                                                                                                                                                                                                                                                                                        |
|--------------------------------------------------------------------------------------------------------------------------------------------------------------------------------------------------------------------------------------------------------------------------------------------------------------------------------------------------------------------------------------------------------------------------------------------------------------------------------------------------------------------------------------------------------------------------------------------------------------------------------------------------------------------------------------------------------------------------------------------------------------------------------------------------------------------------------------------------------------------------|-------------------------------------------------------------------------------------------------------------------------------------------------------------------------------------------------------------------------------------------------------------------------------------------------------------------------------------------------------------------------------------------------------------------------------------------------------------------------------------------------------------------------------------------------------------------------------------------------------------------------------------------------------------------------------------------------------------------------------------------------------------------------------------------------------------------------------------------------------------------------------------------------------------------------------------------------------------------------------------------------------------|--------------------------------------------------------------------------------------------------------------------------------------------------------------------------------------------------------------------------------------------------------------------------------------------------------------------------------------------------------------------------------------------------------------------------------------------------------------------------------------------------------------------------------------------------------------------------------------------------------------------------------------------------------------------------------------------------------------------------------------------------------------------------------------------------------------------------------------------------------------------------------------------------------------------------------------------------------------------------------------------------------|
| <p><b>19</b></p>                                                                                                                                                                                                                                                                                                                                                                                                                                                                                                                                                                                                                                                                                                                                                                        |                                                                                                                                                                                                                                                                                                                                                                                                                                                                                                                                                                                                                                                                                                                                                                                                                                                                                                                            |                                                                                                                                                                                                                                                                                                                                                                                                                                                                                                                                                                                                                                                                                                                                                                                                                                                                                                                     |
| <p>-11</p> <p>C -1.45074700 0.61459500 -0.18331100</p> <p>C 0.00836900 0.23771600 -0.08915900</p> <p>C 0.91073000 1.19145300 0.38051000</p> <p>C 0.51122800 -0.99587500 -0.50030400</p> <p>C 2.26723600 0.91716500 0.46159100</p> <p>C 0.52956500 2.16052400 0.67705200</p> <p>C 1.87078300 -1.27001400 -0.43442600</p> <p>C -0.16643600 -1.74648500 -0.88493000</p> <p>C 2.75458500 -0.31765400 0.05285400</p> <p>H 2.94826900 1.66966400 0.84113500</p> <p>H 2.24146400 -2.23127000 -0.76999200</p> <p>H 3.81469300 -0.53270500 0.10748800</p> <p>O -1.72174100 1.81699700 -0.54977900</p> <p>C -2.40438000 -0.30200800 0.13426500</p> <p>H -3.46954400 -0.11813300 0.11613500</p> <p>F -2.10343300 -1.57664800 0.59769200</p>                                                                                                                                         | <p>-11</p> <p>C -0.45721300 1.15270000 0.17914500</p> <p>C 0.82857000 0.40416500 0.06955500</p> <p>C 2.00653800 1.13438100 -0.08395600</p> <p>C 0.88424600 -0.98876900 0.08825400</p> <p>C 3.22115900 0.48586400 -0.21394500</p> <p>H 1.95458200 2.21504800 -0.09932800</p> <p>C 2.10149800 -1.63673800 -0.05340100</p> <p>H -0.01987500 -1.57130200 0.20518600</p> <p>C 3.26928000 -0.90264500 -0.20065500</p> <p>H 4.13178500 1.05993500 -0.32703400</p> <p>H 2.13798400 -2.71843600 -0.04643700</p> <p>H 4.21908400 -1.41194600 -0.30497800</p> <p>O -0.52293200 2.33387900 -0.08397900</p> <p>C -1.71339700 0.41381700 0.61894900</p> <p>H -2.46128300 1.16623300 0.87346600</p> <p>C -2.28938600 -0.47418200 -0.52757600</p> <p>O -2.43441200 0.14032500 -1.60029100</p> <p>O -2.54946900 -1.65405600 -0.25377200</p> <p>F -1.44617000 -0.31469700 1.77169300</p>                                                                                                                                      | <p>-11</p> <p>C -3.25175100 0.57480200 -0.27930000</p> <p>C -2.01685800 1.16380400 -0.05595600</p> <p>C -0.86918100 0.38829100 0.09721200</p> <p>C -0.98598900 -0.99746100 0.00110800</p> <p>C -2.21853500 -1.58888800 -0.23821600</p> <p>C -3.35685200 -0.80658500 -0.37288700</p> <p>H -4.13420600 1.19427800 -0.38451000</p> <p>H -1.92514000 2.24108600 -0.00084100</p> <p>H -1.05316000 -1.61676500 0.10171000</p> <p>H -2.28909700 -2.66658500 -0.32281200</p> <p>H -4.31888100 -1.26974500 -0.55431000</p> <p>C 0.44365500 1.10032100 0.31355700</p> <p>C 1.43615500 0.50070800 1.07197600</p> <p>H 2.29683700 1.05522800 1.42372600</p> <p>O 0.60837000 2.21758400 -0.25322200</p> <p>C 2.65394300 -0.54633000 -0.74180100</p> <p>C 3.01510700 0.37787900 -1.36228400</p> <p>O 2.51899100 -1.65900900 -0.39945200</p> <p>F 1.14761500 -0.57345500 1.89806000</p>                                                                                                                               |
| <p><b>20</b></p>                                                                                                                                                                                                                                                                                                                                                                                                                                                                                                                                                                                                                                                                                                                                                                        |                                                                                                                                                                                                                                                                                                                                                                                                                                                                                                                                                                                                                                                                                                                                                                                                                                                                                                                            |                                                                                                                                                                                                                                                                                                                                                                                                                                                                                                                                                                                                                                                                                                                                                                                                                                                                                                                     |
| <p>-11</p> <p>C 0.21920100 0.08577100 -0.05416500</p> <p>C 1.06964700 1.16714400 0.17592800</p> <p>C 2.44526300 1.00305700 0.25301800</p> <p>C 3.00936000 -0.25403800 0.08461900</p> <p>C 2.17948700 -1.33964800 -0.16371600</p> <p>C 0.80419400 -1.16991600 -0.23229100</p> <p>H 0.62453900 2.14699300 0.29126500</p> <p>H 3.80869800 1.86023500 0.44330200</p> <p>H 4.08314400 -0.38584400 0.13696400</p> <p>H 2.60664800 -2.32423500 -0.31399000</p> <p>H 0.17646500 -2.02603300 -0.44631600</p> <p>C -1.27506200 0.33433700 -0.11543100</p> <p>C -2.11746200 -0.68979300 0.22404000</p> <p>H -1.71118000 -1.64036500 0.54540100</p> <p>C -3.60987700 -0.52474700 0.21809100</p> <p>H -3.97395100 -0.10340100 -0.72596400</p> <p>H -4.11649200 -1.48162200 0.36561000</p> <p>H -3.97050800 0.15213700 1.00515600</p> <p>O -1.64348400 1.51614100 -0.45524700</p>      | <p>-11</p> <p>C 0.87957000 -0.39684400 -0.11461700</p> <p>C 1.95360600 -1.18581200 0.29419300</p> <p>C 3.23705600 -0.66957900 0.32553500</p> <p>C 3.46327800 0.64829100 -0.05096700</p> <p>C 2.40145000 1.44316200 -0.45663600</p> <p>C 1.11580800 0.92427900 -0.49118300</p> <p>H 1.76534300 -2.21048800 0.58615000</p> <p>H 4.06326300 -1.29278300 0.64340300</p> <p>H 4.46664500 1.05468000 -0.02719100</p> <p>H 2.57353600 2.47151300 -0.74764600</p> <p>H 0.29763600 1.56164800 -0.79996000</p> <p>C -0.49211700 -1.00868300 -0.13678000</p> <p>C -2.90413700 -0.99132200 -0.85692000</p> <p>H -3.23444200 -1.47149700 0.06377600</p> <p>H -3.70696200 -0.34857400 -1.22136900</p> <p>H -2.72505400 -1.77024600 -1.59959500</p> <p>O -0.64504500 -2.15862200 0.22320100</p> <p>C -1.64879500 -0.16255800 -0.61351900</p> <p>H -1.35519000 0.33025500 -1.54145400</p> <p>C -1.95642500 0.95923200 0.43395900</p> <p>O -1.98779700 0.59722700 1.62773400</p> <p>O -2.17222500 2.10070600 -0.02024800</p> | <p>-11</p> <p>C -0.86721700 -0.42147300 0.13456300</p> <p>C -1.83792900 -1.11002900 -0.59091700</p> <p>C -3.14865200 -0.65979000 -0.65584100</p> <p>C -3.51969200 0.50094300 0.00680300</p> <p>C -2.56432100 1.20244100 0.79381900</p> <p>C -1.25647700 0.74621900 0.97981900</p> <p>H -1.53844500 -2.01278700 -1.10647300</p> <p>H -3.88259100 -1.21743800 -1.22553800</p> <p>H -4.54132400 0.85745500 -0.04024000</p> <p>H -2.83905000 2.11339100 1.24896400</p> <p>H -0.53169200 1.32070800 1.35329800</p> <p>C 0.54114000 -0.99262200 0.16751400</p> <p>C 1.50751100 -0.38127900 0.95763400</p> <p>C 1.20751700 0.36355200 1.68104100</p> <p>C 2.84061300 -1.03945700 1.16363300</p> <p>H 3.30685200 -1.28969100 0.20746700</p> <p>H 3.52634700 -0.38524900 1.70725900</p> <p>H 2.76653300 -1.97774700 1.72924700</p> <p>C 2.05490100 1.30165700 -0.68514900</p> <p>O 0.75955100 -2.01031100 -0.55142500</p> <p>O 2.76408500 0.69292300 -1.39393300</p> <p>O 1.47968800 2.23590900 -0.26610700</p> |
| <p><b>21</b></p>                                                                                                                                                                                                                                                                                                                                                                                                                                                                                                                                                                                                                                                                                                                                                                      |                                                                                                                                                                                                                                                                                                                                                                                                                                                                                                                                                                                                                                                                                                                                                                                                                                                                                                                          |                                                                                                                                                                                                                                                                                                                                                                                                                                                                                                                                                                                                                                                                                                                                                                                                                                                                                                                   |
| <p>-11</p> <p>C 1.51021100 -0.03250000 -0.12602100</p> <p>O 1.54512100 -1.27621100 0.01548900</p> <p>O 0.28853100 0.57686900 -0.47156700</p> <p>O -0.95853500 0.05871200 0.00663100</p> <p>C -1.36878400 -1.20748600 -0.74569600</p> <p>H -0.67415100 -2.01623500 -0.53342100</p> <p>H -2.37804200 -1.50702500 -0.45248900</p> <p>H -1.36852400 -1.01798700 -1.82149000</p> <p>C -1.95716700 1.17265900 -0.29602000</p> <p>H -1.97260500 1.38732900 -1.36626800</p> <p>H -2.96257000 0.87860800 0.01118300</p> <p>H -1.68432400 2.08586000 0.23591800</p> <p>C -0.90796300 -0.18820100 1.51278400</p> <p>H -0.20514300 -0.98563900 1.74756400</p> <p>H -0.59726300 0.72031700 2.03317300</p> <p>H -1.89725500 -0.47048600 1.87855400</p> <p>C 2.54075100 0.87486800 -0.02767200</p> <p>H 2.36931700 1.93457100 -0.15558100</p> <p>H 3.55026300 0.51711100 0.12744000</p> | <p>-11</p> <p>C -0.33255300 0.81955300 -0.08577300</p> <p>O -0.05555100 1.63735200 0.76145100</p> <p>C -1.68470700 0.69577900 -0.72125500</p> <p>H -1.59326200 0.37275600 -1.75801400</p> <p>H -2.17009300 1.67111800 -0.70440700</p> <p>O 0.51345700 -0.08739500 -0.57173500</p> <p>C 1.87592700 -0.24876300 -0.07280500</p> <p>C -2.60729300 -0.31695900 0.02020700</p> <p>O -2.13439000 -0.90387200 1.01368100</p> <p>O -3.74938000 -0.43715300 -0.46453100</p> <p>C 2.68963000 1.01219600 -0.33551400</p> <p>H 2.34837900 1.84125700 0.27969200</p> <p>H 3.73791600 0.81415000 -0.10625000</p> <p>H 2.61873800 1.29568400 -1.38695900</p> <p>C 2.40882000 -1.40502300 -0.90702000</p> <p>H 2.39677800 -1.15044400 -1.96770000</p> <p>H 3.43551200 -1.62931600 -0.61589700</p> <p>H 1.80155300 -2.29821400 -0.75470300</p> <p>C 1.85736300 -0.62507900 1.40285800</p> <p>H 1.48414200 0.19186900 2.01588200</p> <p>H 1.23155000 -1.50432900 1.56186700</p> <p>H 2.87272100 -0.86619900 1.72139600</p>    | <p>-11</p> <p>C -0.26474600 1.13562400 -0.44557200</p> <p>O -0.04897600 1.86698700 0.53666600</p> <p>C -1.40638400 1.08858700 -1.23961100</p> <p>H -1.41331100 0.49349200 -2.14156400</p> <p>H -2.12213200 1.89548600 -1.14863900</p> <p>O 0.69869600 0.21320200 -0.85186700</p> <p>C 1.68183600 -0.30568200 0.05695500</p> <p>C -2.53931900 -0.62825300 0.20077200</p> <p>C -2.86598700 0.04175300 1.10084400</p> <p>C -2.39786000 -1.56373200 -0.48684800</p> <p>C 2.72903300 0.74734600 0.41601300</p> <p>H 2.28357700 1.54774900 1.00070900</p> <p>H 3.53666000 0.28633900 0.98947000</p> <p>C 3.15755900 1.17303200 -0.49395300</p> <p>C 2.34304000 -1.42992500 -0.73479300</p> <p>H 2.79198700 -1.03790900 -1.64926800</p> <p>H 3.12672900 -1.90309800 -0.14052000</p> <p>H 1.60763800 -2.18873000 -1.00755300</p> <p>C 1.01841100 -0.88102500 1.30610700</p> <p>C 0.53300600 -0.09625200 1.88283600</p> <p>H 0.27264300 -1.62781700 1.02522400</p> <p>H 1.76743800 -1.36800400 1.93367900</p>   |

|                   |                                                                                                                                                                                                                                                                                                                                                                                                                                                                                                                                                                                                                                                                                                                                                                                                                                                                                                                                                                                                                                                                                                                                                                                                                                                                                                                                                                                                                                                                                                                                                                                                                                                                                                                                                                                                                                                                                                                                                                                                                                                                                                                                                                                                                                                                                                                                                                                                                              |                                                                                     |                                                                                       |             |             |   |             |             |             |   |             |             |             |   |             |             |             |   |             |             |             |   |             |            |             |   |             |             |             |   |             |             |             |   |             |             |             |   |             |             |             |   |             |             |             |   |             |             |            |   |             |             |             |   |             |             |             |   |             |             |             |   |             |             |             |   |             |             |             |   |             |             |             |                                                                                                                                                                                                                                                                                                                                                                                                                                                                                                                                                                                                                                                                                                                                                                                                                                                                                                                                                                                                                                                                                                                                                                                                                                                                                                                                                                                                                                                                                                                                                                                                                                                                                                                                                                           |            |             |             |            |            |             |             |            |            |            |            |             |            |             |             |             |            |             |             |             |            |             |             |            |            |             |             |            |            |             |            |            |            |             |             |            |            |            |            |            |            |            |            |                                                                                                                                                                                                                                                                                                                                                                                                                                                                                                                                                                                                                                                                                                                                                                                                                                                                                                                                                                                                                                                                                                                                                                                                                                                                                                                                                                                                                                                                                                                                                                                                                                                                                                                                                                                                                                                                                                                                                                                                                                                                                                                                                                                                                                                                                                                                                                                                                                                                                                                                                                                                                                                                            |   |            |             |             |   |            |             |             |   |            |             |            |   |            |             |            |   |            |             |            |   |            |             |             |   |             |             |             |   |             |             |             |   |             |             |             |   |             |             |             |                                                                                                                                                                                                                                                                                                                                                                                                                                                                                                                                                                                                                                                                                                                                                                                                                                                                                                                                                                                                                                                                                                                                                                                                                                                                                                                                                                                                                                                                                                                                                                                                                                                                                                                                                                            |            |             |             |            |            |             |             |            |            |             |             |             |            |            |            |             |            |             |             |             |            |             |             |            |             |             |             |            |             |             |             |            |             |            |            |            |             |            |            |            |            |            |             |             |             |             |             |             |             |             |             |             |             |             |             |            |             |             |             |            |             |             |             |            |             |             |             |            |             |             |             |             |             |             |             |             |             |             |            |             |             |             |             |             |             |             |             |                                                                                                                                                                                                                                                                                                                                                                                                                                                                                                                                                                                                                                                                                                                                                                                                                                                                                                                                                                                                                                                                                                                                                                                                                                                                                                                                                                                                                                                                                                                                                                                                                                                                                                                                                                                                                                                                                                                                                                                                                                                                                                                                                                                                                                                                                                                                                                                                                                                                                                                                                                                                                                                                         |   |            |             |            |   |            |            |            |   |            |             |            |   |            |            |            |   |            |            |            |   |            |            |             |   |            |            |             |   |            |             |             |   |            |            |             |   |            |             |            |   |            |             |            |   |            |             |             |   |            |             |             |   |            |             |            |   |            |             |            |   |            |             |             |   |             |            |            |   |             |            |            |   |             |            |             |   |             |            |             |   |            |            |            |   |             |             |            |   |             |            |            |   |             |             |             |   |             |             |            |   |             |            |            |   |             |             |             |   |             |             |             |   |             |             |             |   |             |            |            |   |             |             |             |   |             |             |             |
|-------------------|------------------------------------------------------------------------------------------------------------------------------------------------------------------------------------------------------------------------------------------------------------------------------------------------------------------------------------------------------------------------------------------------------------------------------------------------------------------------------------------------------------------------------------------------------------------------------------------------------------------------------------------------------------------------------------------------------------------------------------------------------------------------------------------------------------------------------------------------------------------------------------------------------------------------------------------------------------------------------------------------------------------------------------------------------------------------------------------------------------------------------------------------------------------------------------------------------------------------------------------------------------------------------------------------------------------------------------------------------------------------------------------------------------------------------------------------------------------------------------------------------------------------------------------------------------------------------------------------------------------------------------------------------------------------------------------------------------------------------------------------------------------------------------------------------------------------------------------------------------------------------------------------------------------------------------------------------------------------------------------------------------------------------------------------------------------------------------------------------------------------------------------------------------------------------------------------------------------------------------------------------------------------------------------------------------------------------------------------------------------------------------------------------------------------------|-------------------------------------------------------------------------------------|---------------------------------------------------------------------------------------|-------------|-------------|---|-------------|-------------|-------------|---|-------------|-------------|-------------|---|-------------|-------------|-------------|---|-------------|-------------|-------------|---|-------------|------------|-------------|---|-------------|-------------|-------------|---|-------------|-------------|-------------|---|-------------|-------------|-------------|---|-------------|-------------|-------------|---|-------------|-------------|-------------|---|-------------|-------------|------------|---|-------------|-------------|-------------|---|-------------|-------------|-------------|---|-------------|-------------|-------------|---|-------------|-------------|-------------|---|-------------|-------------|-------------|---|-------------|-------------|-------------|---------------------------------------------------------------------------------------------------------------------------------------------------------------------------------------------------------------------------------------------------------------------------------------------------------------------------------------------------------------------------------------------------------------------------------------------------------------------------------------------------------------------------------------------------------------------------------------------------------------------------------------------------------------------------------------------------------------------------------------------------------------------------------------------------------------------------------------------------------------------------------------------------------------------------------------------------------------------------------------------------------------------------------------------------------------------------------------------------------------------------------------------------------------------------------------------------------------------------------------------------------------------------------------------------------------------------------------------------------------------------------------------------------------------------------------------------------------------------------------------------------------------------------------------------------------------------------------------------------------------------------------------------------------------------------------------------------------------------------------------------------------------------|------------|-------------|-------------|------------|------------|-------------|-------------|------------|------------|------------|------------|-------------|------------|-------------|-------------|-------------|------------|-------------|-------------|-------------|------------|-------------|-------------|------------|------------|-------------|-------------|------------|------------|-------------|------------|------------|------------|-------------|-------------|------------|------------|------------|------------|------------|------------|------------|------------|----------------------------------------------------------------------------------------------------------------------------------------------------------------------------------------------------------------------------------------------------------------------------------------------------------------------------------------------------------------------------------------------------------------------------------------------------------------------------------------------------------------------------------------------------------------------------------------------------------------------------------------------------------------------------------------------------------------------------------------------------------------------------------------------------------------------------------------------------------------------------------------------------------------------------------------------------------------------------------------------------------------------------------------------------------------------------------------------------------------------------------------------------------------------------------------------------------------------------------------------------------------------------------------------------------------------------------------------------------------------------------------------------------------------------------------------------------------------------------------------------------------------------------------------------------------------------------------------------------------------------------------------------------------------------------------------------------------------------------------------------------------------------------------------------------------------------------------------------------------------------------------------------------------------------------------------------------------------------------------------------------------------------------------------------------------------------------------------------------------------------------------------------------------------------------------------------------------------------------------------------------------------------------------------------------------------------------------------------------------------------------------------------------------------------------------------------------------------------------------------------------------------------------------------------------------------------------------------------------------------------------------------------------------------------|---|------------|-------------|-------------|---|------------|-------------|-------------|---|------------|-------------|------------|---|------------|-------------|------------|---|------------|-------------|------------|---|------------|-------------|-------------|---|-------------|-------------|-------------|---|-------------|-------------|-------------|---|-------------|-------------|-------------|---|-------------|-------------|-------------|----------------------------------------------------------------------------------------------------------------------------------------------------------------------------------------------------------------------------------------------------------------------------------------------------------------------------------------------------------------------------------------------------------------------------------------------------------------------------------------------------------------------------------------------------------------------------------------------------------------------------------------------------------------------------------------------------------------------------------------------------------------------------------------------------------------------------------------------------------------------------------------------------------------------------------------------------------------------------------------------------------------------------------------------------------------------------------------------------------------------------------------------------------------------------------------------------------------------------------------------------------------------------------------------------------------------------------------------------------------------------------------------------------------------------------------------------------------------------------------------------------------------------------------------------------------------------------------------------------------------------------------------------------------------------------------------------------------------------------------------------------------------------|------------|-------------|-------------|------------|------------|-------------|-------------|------------|------------|-------------|-------------|-------------|------------|------------|------------|-------------|------------|-------------|-------------|-------------|------------|-------------|-------------|------------|-------------|-------------|-------------|------------|-------------|-------------|-------------|------------|-------------|------------|------------|------------|-------------|------------|------------|------------|------------|------------|-------------|-------------|-------------|-------------|-------------|-------------|-------------|-------------|-------------|-------------|-------------|-------------|-------------|------------|-------------|-------------|-------------|------------|-------------|-------------|-------------|------------|-------------|-------------|-------------|------------|-------------|-------------|-------------|-------------|-------------|-------------|-------------|-------------|-------------|-------------|------------|-------------|-------------|-------------|-------------|-------------|-------------|-------------|-------------|-------------------------------------------------------------------------------------------------------------------------------------------------------------------------------------------------------------------------------------------------------------------------------------------------------------------------------------------------------------------------------------------------------------------------------------------------------------------------------------------------------------------------------------------------------------------------------------------------------------------------------------------------------------------------------------------------------------------------------------------------------------------------------------------------------------------------------------------------------------------------------------------------------------------------------------------------------------------------------------------------------------------------------------------------------------------------------------------------------------------------------------------------------------------------------------------------------------------------------------------------------------------------------------------------------------------------------------------------------------------------------------------------------------------------------------------------------------------------------------------------------------------------------------------------------------------------------------------------------------------------------------------------------------------------------------------------------------------------------------------------------------------------------------------------------------------------------------------------------------------------------------------------------------------------------------------------------------------------------------------------------------------------------------------------------------------------------------------------------------------------------------------------------------------------------------------------------------------------------------------------------------------------------------------------------------------------------------------------------------------------------------------------------------------------------------------------------------------------------------------------------------------------------------------------------------------------------------------------------------------------------------------------------------------------|---|------------|-------------|------------|---|------------|------------|------------|---|------------|-------------|------------|---|------------|------------|------------|---|------------|------------|------------|---|------------|------------|-------------|---|------------|------------|-------------|---|------------|-------------|-------------|---|------------|------------|-------------|---|------------|-------------|------------|---|------------|-------------|------------|---|------------|-------------|-------------|---|------------|-------------|-------------|---|------------|-------------|------------|---|------------|-------------|------------|---|------------|-------------|-------------|---|-------------|------------|------------|---|-------------|------------|------------|---|-------------|------------|-------------|---|-------------|------------|-------------|---|------------|------------|------------|---|-------------|-------------|------------|---|-------------|------------|------------|---|-------------|-------------|-------------|---|-------------|-------------|------------|---|-------------|------------|------------|---|-------------|-------------|-------------|---|-------------|-------------|-------------|---|-------------|-------------|-------------|---|-------------|------------|------------|---|-------------|-------------|-------------|---|-------------|-------------|-------------|
| 22                | 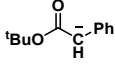                                                                                                                                                                                                                                                                                                                                                                                                                                                                                                                                                                                                                                                                                                                                                                                                                                                                                                                                                                                                                                                                                                                                                                                                                                                                                                                                                                                                                                                                                                                                                                                                                                                                                                                                                                                                                                                                                                                                                                                                                                                                                                                                                                                                                                                                                                                                            |    |    |             |             |   |             |             |             |   |             |             |             |   |             |             |             |   |             |             |             |   |             |            |             |   |             |             |             |   |             |             |             |   |             |             |             |   |             |             |             |   |             |             |             |   |             |             |            |   |             |             |             |   |             |             |             |   |             |             |             |   |             |             |             |   |             |             |             |   |             |             |             |                                                                                                                                                                                                                                                                                                                                                                                                                                                                                                                                                                                                                                                                                                                                                                                                                                                                                                                                                                                                                                                                                                                                                                                                                                                                                                                                                                                                                                                                                                                                                                                                                                                                                                                                                                           |            |             |             |            |            |             |             |            |            |            |            |             |            |             |             |             |            |             |             |             |            |             |             |            |            |             |             |            |            |             |            |            |            |             |             |            |            |            |            |            |            |            |            |                                                                                                                                                                                                                                                                                                                                                                                                                                                                                                                                                                                                                                                                                                                                                                                                                                                                                                                                                                                                                                                                                                                                                                                                                                                                                                                                                                                                                                                                                                                                                                                                                                                                                                                                                                                                                                                                                                                                                                                                                                                                                                                                                                                                                                                                                                                                                                                                                                                                                                                                                                                                                                                                            |   |            |             |             |   |            |             |             |   |            |             |            |   |            |             |            |   |            |             |            |   |            |             |             |   |             |             |             |   |             |             |             |   |             |             |             |   |             |             |             |                                                                                                                                                                                                                                                                                                                                                                                                                                                                                                                                                                                                                                                                                                                                                                                                                                                                                                                                                                                                                                                                                                                                                                                                                                                                                                                                                                                                                                                                                                                                                                                                                                                                                                                                                                            |            |             |             |            |            |             |             |            |            |             |             |             |            |            |            |             |            |             |             |             |            |             |             |            |             |             |             |            |             |             |             |            |             |            |            |            |             |            |            |            |            |            |             |             |             |             |             |             |             |             |             |             |             |             |             |            |             |             |             |            |             |             |             |            |             |             |             |            |             |             |             |             |             |             |             |             |             |             |            |             |             |             |             |             |             |             |             |                                                                                                                                                                                                                                                                                                                                                                                                                                                                                                                                                                                                                                                                                                                                                                                                                                                                                                                                                                                                                                                                                                                                                                                                                                                                                                                                                                                                                                                                                                                                                                                                                                                                                                                                                                                                                                                                                                                                                                                                                                                                                                                                                                                                                                                                                                                                                                                                                                                                                                                                                                                                                                                                         |   |            |             |            |   |            |            |            |   |            |             |            |   |            |            |            |   |            |            |            |   |            |            |             |   |            |            |             |   |            |             |             |   |            |            |             |   |            |             |            |   |            |             |            |   |            |             |             |   |            |             |             |   |            |             |            |   |            |             |            |   |            |             |             |   |             |            |            |   |             |            |            |   |             |            |             |   |             |            |             |   |            |            |            |   |             |             |            |   |             |            |            |   |             |             |             |   |             |             |            |   |             |            |            |   |             |             |             |   |             |             |             |   |             |             |             |   |             |            |            |   |             |             |             |   |             |             |             |
|                   | <p>-11</p> <table border="1"> <tbody> <tr><td>C</td><td>-3.10209500</td><td>-0.07977900</td><td>0.00003000</td></tr> <tr><td>C</td><td>-4.04619900</td><td>-1.27908200</td><td>0.00007100</td></tr> <tr><td>H</td><td>-3.88095200</td><td>-1.89493200</td><td>0.88587300</td></tr> <tr><td>H</td><td>-5.08468400</td><td>-0.94370500</td><td>0.00018800</td></tr> <tr><td>H</td><td>-3.88112600</td><td>-1.89486400</td><td>-0.88580900</td></tr> <tr><td>C</td><td>-3.33326400</td><td>0.74809900</td><td>-1.26286200</td></tr> <tr><td>H</td><td>-4.37590900</td><td>1.07028800</td><td>-1.30669200</td></tr> <tr><td>H</td><td>-2.68974500</td><td>1.62398100</td><td>-1.27628500</td></tr> <tr><td>H</td><td>-3.12629300</td><td>0.14393000</td><td>-2.14880300</td></tr> <tr><td>C</td><td>-3.33312200</td><td>0.74806800</td><td>1.26295000</td></tr> <tr><td>H</td><td>-3.12619300</td><td>0.14386400</td><td>2.14887600</td></tr> <tr><td>H</td><td>-2.68954000</td><td>1.62390300</td><td>1.27636800</td></tr> <tr><td>H</td><td>-4.37573600</td><td>1.07036300</td><td>1.30683400</td></tr> <tr><td>O</td><td>-1.80010100</td><td>-0.68410600</td><td>-0.00006700</td></tr> <tr><td>O</td><td>-0.62418900</td><td>0.05923400</td><td>-0.00008000</td></tr> <tr><td>O</td><td>-0.66828400</td><td>1.29929900</td><td>-0.00015100</td></tr> <tr><td>C</td><td>0.49439600</td><td>-0.78010300</td><td>-0.00003100</td></tr> <tr><td>H</td><td>0.30174500</td><td>-1.84588300</td><td>-0.00001500</td></tr> <tr><td>C</td><td>1.86666800</td><td>-0.36861900</td><td>-0.00000200</td></tr> <tr><td>C</td><td>2.88788600</td><td>-1.35042500</td><td>-0.00002100</td></tr> <tr><td>C</td><td>2.31046700</td><td>0.97522400</td><td>0.00005300</td></tr> <tr><td>C</td><td>4.22981100</td><td>-1.02184100</td><td>-0.00001200</td></tr> <tr><td>H</td><td>2.59951900</td><td>-2.39700800</td><td>-0.00004500</td></tr> <tr><td>C</td><td>3.65934100</td><td>1.29423200</td><td>0.00006500</td></tr> <tr><td>H</td><td>1.56804000</td><td>1.76036200</td><td>0.00007900</td></tr> <tr><td>C</td><td>4.63972500</td><td>0.30924900</td><td>0.00002300</td></tr> <tr><td>H</td><td>4.96979800</td><td>-1.81510600</td><td>-0.00003000</td></tr> <tr><td>H</td><td>3.95054400</td><td>2.33962600</td><td>0.00010300</td></tr> <tr><td>H</td><td>5.69106200</td><td>0.56810000</td><td>0.00000600</td></tr> </tbody> </table> | C                                                                                   | -3.10209500                                                                           | -0.07977900 | 0.00003000  | C | -4.04619900 | -1.27908200 | 0.00007100  | H | -3.88095200 | -1.89493200 | 0.88587300  | H | -5.08468400 | -0.94370500 | 0.00018800  | H | -3.88112600 | -1.89486400 | -0.88580900 | C | -3.33326400 | 0.74809900 | -1.26286200 | H | -4.37590900 | 1.07028800  | -1.30669200 | H | -2.68974500 | 1.62398100  | -1.27628500 | H | -3.12629300 | 0.14393000  | -2.14880300 | C | -3.33312200 | 0.74806800  | 1.26295000  | H | -3.12619300 | 0.14386400  | 2.14887600  | H | -2.68954000 | 1.62390300  | 1.27636800 | H | -4.37573600 | 1.07036300  | 1.30683400  | O | -1.80010100 | -0.68410600 | -0.00006700 | O | -0.62418900 | 0.05923400  | -0.00008000 | O | -0.66828400 | 1.29929900  | -0.00015100 | C | 0.49439600  | -0.78010300 | -0.00003100 | H | 0.30174500  | -1.84588300 | -0.00001500 | C                                                                                                                                                                                                                                                                                                                                                                                                                                                                                                                                                                                                                                                                                                                                                                                                                                                                                                                                                                                                                                                                                                                                                                                                                                                                                                                                                                                                                                                                                                                                                                                                                                                                                                                                                                         | 1.86666800 | -0.36861900 | -0.00000200 | C          | 2.88788600 | -1.35042500 | -0.00002100 | C          | 2.31046700 | 0.97522400 | 0.00005300 | C           | 4.22981100 | -1.02184100 | -0.00001200 | H           | 2.59951900 | -2.39700800 | -0.00004500 | C           | 3.65934100 | 1.29423200  | 0.00006500  | H          | 1.56804000 | 1.76036200  | 0.00007900  | C          | 4.63972500 | 0.30924900  | 0.00002300 | H          | 4.96979800 | -1.81510600 | -0.00003000 | H          | 3.95054400 | 2.33962600 | 0.00010300 | H          | 5.69106200 | 0.56810000 | 0.00000600 | <p>-11</p> <table border="1"> <tbody> <tr><td>C</td><td>3.11974600</td><td>-0.53082800</td><td>0.08153200</td></tr> <tr><td>C</td><td>4.10205500</td><td>0.08805700</td><td>1.06566800</td></tr> <tr><td>H</td><td>3.85870100</td><td>-0.20684100</td><td>2.08727000</td></tr> <tr><td>H</td><td>5.11410900</td><td>-0.24892300</td><td>0.83916000</td></tr> <tr><td>H</td><td>4.07550500</td><td>1.17648700</td><td>0.99983800</td></tr> <tr><td>C</td><td>3.43351100</td><td>-0.07543700</td><td>-1.33734400</td></tr> <tr><td>H</td><td>4.45245400</td><td>-0.37329500</td><td>-1.58934800</td></tr> <tr><td>H</td><td>2.75175300</td><td>-0.52076700</td><td>-2.05793900</td></tr> <tr><td>H</td><td>3.36716800</td><td>1.01108200</td><td>-1.40952800</td></tr> <tr><td>C</td><td>3.12070200</td><td>-2.04830300</td><td>0.21487800</td></tr> <tr><td>H</td><td>2.82404600</td><td>-2.33906500</td><td>1.22404400</td></tr> <tr><td>H</td><td>2.44553100</td><td>-2.51104200</td><td>-0.50099600</td></tr> <tr><td>H</td><td>4.13020400</td><td>-2.42149600</td><td>0.03565500</td></tr> <tr><td>O</td><td>1.83628100</td><td>0.01318200</td><td>0.51652000</td></tr> <tr><td>C</td><td>0.68878900</td><td>-0.25731800</td><td>-0.10407900</td></tr> <tr><td>O</td><td>0.57097100</td><td>-1.01156800</td><td>-1.03821700</td></tr> <tr><td>C</td><td>-0.43279000</td><td>0.52501400</td><td>0.54614900</td></tr> <tr><td>H</td><td>-0.25508800</td><td>0.51868400</td><td>1.62091400</td></tr> <tr><td>C</td><td>-0.37132500</td><td>2.02693300</td><td>0.08809600</td></tr> <tr><td>O</td><td>-0.88768200</td><td>2.84183700</td><td>0.87431200</td></tr> <tr><td>O</td><td>0.15623100</td><td>2.25601200</td><td>-1.01806300</td></tr> <tr><td>C</td><td>-1.79599000</td><td>-0.05709500</td><td>0.27020700</td></tr> <tr><td>C</td><td>-2.52369900</td><td>-0.65250600</td><td>1.29500700</td></tr> <tr><td>C</td><td>-2.36143200</td><td>-0.00306100</td><td>-1.00237200</td></tr> <tr><td>C</td><td>-3.78498900</td><td>-1.18433200</td><td>1.05973700</td></tr> <tr><td>O</td><td>-2.09928500</td><td>-0.70042300</td><td>2.29133100</td></tr> <tr><td>C</td><td>-3.61903700</td><td>-0.53328400</td><td>-1.24138600</td></tr> <tr><td>H</td><td>-1.80726800</td><td>0.46419600</td><td>-1.80629700</td></tr> <tr><td>C</td><td>-4.33649500</td><td>-1.12769700</td><td>-0.21074700</td></tr> <tr><td>H</td><td>-4.33546900</td><td>-1.64257100</td><td>1.87214800</td></tr> <tr><td>H</td><td>-4.04333900</td><td>-0.48154600</td><td>-2.23663900</td></tr> <tr><td>H</td><td>-5.31963300</td><td>-1.54104900</td><td>-0.39810100</td></tr> </tbody> </table> | C | 3.11974600 | -0.53082800 | 0.08153200  | C | 4.10205500 | 0.08805700  | 1.06566800  | H | 3.85870100 | -0.20684100 | 2.08727000 | H | 5.11410900 | -0.24892300 | 0.83916000 | H | 4.07550500 | 1.17648700  | 0.99983800 | C | 3.43351100 | -0.07543700 | -1.33734400 | H | 4.45245400  | -0.37329500 | -1.58934800 | H | 2.75175300  | -0.52076700 | -2.05793900 | H | 3.36716800  | 1.01108200  | -1.40952800 | C | 3.12070200  | -2.04830300 | 0.21487800  | H                                                                                                                                                                                                                                                                                                                                                                                                                                                                                                                                                                                                                                                                                                                                                                                                                                                                                                                                                                                                                                                                                                                                                                                                                                                                                                                                                                                                                                                                                                                                                                                                                                                                                                                                                                          | 2.82404600 | -2.33906500 | 1.22404400  | H          | 2.44553100 | -2.51104200 | -0.50099600 | H          | 4.13020400 | -2.42149600 | 0.03565500  | O           | 1.83628100 | 0.01318200 | 0.51652000 | C           | 0.68878900 | -0.25731800 | -0.10407900 | O           | 0.57097100 | -1.01156800 | -1.03821700 | C          | -0.43279000 | 0.52501400  | 0.54614900  | H          | -0.25508800 | 0.51868400  | 1.62091400  | C          | -0.37132500 | 2.02693300 | 0.08809600 | O          | -0.88768200 | 2.84183700 | 0.87431200 | O          | 0.15623100 | 2.25601200 | -1.01806300 | C           | -1.79599000 | -0.05709500 | 0.27020700  | C           | -2.52369900 | -0.65250600 | 1.29500700  | C           | -2.36143200 | -0.00306100 | -1.00237200 | C          | -3.78498900 | -1.18433200 | 1.05973700  | O          | -2.09928500 | -0.70042300 | 2.29133100  | C          | -3.61903700 | -0.53328400 | -1.24138600 | H          | -1.80726800 | 0.46419600  | -1.80629700 | C           | -4.33649500 | -1.12769700 | -0.21074700 | H           | -4.33546900 | -1.64257100 | 1.87214800 | H           | -4.04333900 | -0.48154600 | -2.23663900 | H           | -5.31963300 | -1.54104900 | -0.39810100 | <p>-11</p> <table border="1"> <tbody> <tr><td>C</td><td>3.12664900</td><td>-0.43933200</td><td>0.18775700</td></tr> <tr><td>C</td><td>4.06398400</td><td>0.17023200</td><td>1.22471000</td></tr> <tr><td>H</td><td>3.95147700</td><td>-0.33662500</td><td>2.18458500</td></tr> <tr><td>H</td><td>5.10097100</td><td>0.07065400</td><td>0.90039600</td></tr> <tr><td>H</td><td>3.84313000</td><td>1.22976900</td><td>1.36342500</td></tr> <tr><td>C</td><td>3.26478500</td><td>0.30991200</td><td>-1.13464400</td></tr> <tr><td>H</td><td>4.29774900</td><td>0.25263700</td><td>-1.48291500</td></tr> <tr><td>H</td><td>2.61449800</td><td>-0.11444200</td><td>-1.89630800</td></tr> <tr><td>H</td><td>3.00963000</td><td>1.36274600</td><td>-0.99720000</td></tr> <tr><td>C</td><td>3.43372900</td><td>-1.92652100</td><td>0.03079000</td></tr> <tr><td>H</td><td>3.27114800</td><td>-2.44371800</td><td>0.97864800</td></tr> <tr><td>H</td><td>2.80003900</td><td>-2.37723900</td><td>-0.72838000</td></tr> <tr><td>H</td><td>4.48035600</td><td>-2.05602500</td><td>-0.25279000</td></tr> <tr><td>O</td><td>1.82015200</td><td>-0.22808600</td><td>0.75865900</td></tr> <tr><td>C</td><td>0.66199200</td><td>-0.52654500</td><td>0.07546000</td></tr> <tr><td>O</td><td>0.67980700</td><td>-1.25055000</td><td>-0.92111900</td></tr> <tr><td>O</td><td>-0.45154200</td><td>0.11716900</td><td>0.66940600</td></tr> <tr><td>H</td><td>-0.25348500</td><td>0.59571500</td><td>1.61925500</td></tr> <tr><td>C</td><td>-0.15601900</td><td>2.09635300</td><td>-0.57427400</td></tr> <tr><td>O</td><td>-0.59397500</td><td>1.81434400</td><td>-1.62727500</td></tr> <tr><td>O</td><td>0.33179700</td><td>2.79731800</td><td>0.23551100</td></tr> <tr><td>C</td><td>-1.83646000</td><td>-0.21677800</td><td>0.41211400</td></tr> <tr><td>C</td><td>-2.82477600</td><td>0.22364800</td><td>1.31514400</td></tr> <tr><td>C</td><td>-2.28912200</td><td>-0.92756300</td><td>-0.71466100</td></tr> <tr><td>C</td><td>-4.16910000</td><td>-0.02907900</td><td>1.11181900</td></tr> <tr><td>H</td><td>-2.51596800</td><td>0.77737300</td><td>2.19581800</td></tr> <tr><td>C</td><td>-3.63861500</td><td>-1.18120400</td><td>-0.91170100</td></tr> <tr><td>H</td><td>-1.56136000</td><td>-1.27450700</td><td>-1.43325200</td></tr> <tr><td>C</td><td>-4.59423100</td><td>-0.73809100</td><td>-0.00712400</td></tr> <tr><td>H</td><td>-4.89397500</td><td>0.32836100</td><td>1.83456000</td></tr> <tr><td>H</td><td>-3.94810800</td><td>-1.73347500</td><td>-1.79234800</td></tr> <tr><td>H</td><td>-5.64600400</td><td>-0.93863400</td><td>-0.16848000</td></tr> </tbody> </table> | C | 3.12664900 | -0.43933200 | 0.18775700 | C | 4.06398400 | 0.17023200 | 1.22471000 | H | 3.95147700 | -0.33662500 | 2.18458500 | H | 5.10097100 | 0.07065400 | 0.90039600 | H | 3.84313000 | 1.22976900 | 1.36342500 | C | 3.26478500 | 0.30991200 | -1.13464400 | H | 4.29774900 | 0.25263700 | -1.48291500 | H | 2.61449800 | -0.11444200 | -1.89630800 | H | 3.00963000 | 1.36274600 | -0.99720000 | C | 3.43372900 | -1.92652100 | 0.03079000 | H | 3.27114800 | -2.44371800 | 0.97864800 | H | 2.80003900 | -2.37723900 | -0.72838000 | H | 4.48035600 | -2.05602500 | -0.25279000 | O | 1.82015200 | -0.22808600 | 0.75865900 | C | 0.66199200 | -0.52654500 | 0.07546000 | O | 0.67980700 | -1.25055000 | -0.92111900 | O | -0.45154200 | 0.11716900 | 0.66940600 | H | -0.25348500 | 0.59571500 | 1.61925500 | C | -0.15601900 | 2.09635300 | -0.57427400 | O | -0.59397500 | 1.81434400 | -1.62727500 | O | 0.33179700 | 2.79731800 | 0.23551100 | C | -1.83646000 | -0.21677800 | 0.41211400 | C | -2.82477600 | 0.22364800 | 1.31514400 | C | -2.28912200 | -0.92756300 | -0.71466100 | C | -4.16910000 | -0.02907900 | 1.11181900 | H | -2.51596800 | 0.77737300 | 2.19581800 | C | -3.63861500 | -1.18120400 | -0.91170100 | H | -1.56136000 | -1.27450700 | -1.43325200 | C | -4.59423100 | -0.73809100 | -0.00712400 | H | -4.89397500 | 0.32836100 | 1.83456000 | H | -3.94810800 | -1.73347500 | -1.79234800 | H | -5.64600400 | -0.93863400 | -0.16848000 |
| C                 | -3.10209500                                                                                                                                                                                                                                                                                                                                                                                                                                                                                                                                                                                                                                                                                                                                                                                                                                                                                                                                                                                                                                                                                                                                                                                                                                                                                                                                                                                                                                                                                                                                                                                                                                                                                                                                                                                                                                                                                                                                                                                                                                                                                                                                                                                                                                                                                                                                                                                                                  | -0.07977900                                                                         | 0.00003000                                                                            |             |             |   |             |             |             |   |             |             |             |   |             |             |             |   |             |             |             |   |             |            |             |   |             |             |             |   |             |             |             |   |             |             |             |   |             |             |             |   |             |             |             |   |             |             |            |   |             |             |             |   |             |             |             |   |             |             |             |   |             |             |             |   |             |             |             |   |             |             |             |                                                                                                                                                                                                                                                                                                                                                                                                                                                                                                                                                                                                                                                                                                                                                                                                                                                                                                                                                                                                                                                                                                                                                                                                                                                                                                                                                                                                                                                                                                                                                                                                                                                                                                                                                                           |            |             |             |            |            |             |             |            |            |            |            |             |            |             |             |             |            |             |             |             |            |             |             |            |            |             |             |            |            |             |            |            |            |             |             |            |            |            |            |            |            |            |            |                                                                                                                                                                                                                                                                                                                                                                                                                                                                                                                                                                                                                                                                                                                                                                                                                                                                                                                                                                                                                                                                                                                                                                                                                                                                                                                                                                                                                                                                                                                                                                                                                                                                                                                                                                                                                                                                                                                                                                                                                                                                                                                                                                                                                                                                                                                                                                                                                                                                                                                                                                                                                                                                            |   |            |             |             |   |            |             |             |   |            |             |            |   |            |             |            |   |            |             |            |   |            |             |             |   |             |             |             |   |             |             |             |   |             |             |             |   |             |             |             |                                                                                                                                                                                                                                                                                                                                                                                                                                                                                                                                                                                                                                                                                                                                                                                                                                                                                                                                                                                                                                                                                                                                                                                                                                                                                                                                                                                                                                                                                                                                                                                                                                                                                                                                                                            |            |             |             |            |            |             |             |            |            |             |             |             |            |            |            |             |            |             |             |             |            |             |             |            |             |             |             |            |             |             |             |            |             |            |            |            |             |            |            |            |            |            |             |             |             |             |             |             |             |             |             |             |             |             |             |            |             |             |             |            |             |             |             |            |             |             |             |            |             |             |             |             |             |             |             |             |             |             |            |             |             |             |             |             |             |             |             |                                                                                                                                                                                                                                                                                                                                                                                                                                                                                                                                                                                                                                                                                                                                                                                                                                                                                                                                                                                                                                                                                                                                                                                                                                                                                                                                                                                                                                                                                                                                                                                                                                                                                                                                                                                                                                                                                                                                                                                                                                                                                                                                                                                                                                                                                                                                                                                                                                                                                                                                                                                                                                                                         |   |            |             |            |   |            |            |            |   |            |             |            |   |            |            |            |   |            |            |            |   |            |            |             |   |            |            |             |   |            |             |             |   |            |            |             |   |            |             |            |   |            |             |            |   |            |             |             |   |            |             |             |   |            |             |            |   |            |             |            |   |            |             |             |   |             |            |            |   |             |            |            |   |             |            |             |   |             |            |             |   |            |            |            |   |             |             |            |   |             |            |            |   |             |             |             |   |             |             |            |   |             |            |            |   |             |             |             |   |             |             |             |   |             |             |             |   |             |            |            |   |             |             |             |   |             |             |             |
| C                 | -4.04619900                                                                                                                                                                                                                                                                                                                                                                                                                                                                                                                                                                                                                                                                                                                                                                                                                                                                                                                                                                                                                                                                                                                                                                                                                                                                                                                                                                                                                                                                                                                                                                                                                                                                                                                                                                                                                                                                                                                                                                                                                                                                                                                                                                                                                                                                                                                                                                                                                  | -1.27908200                                                                         | 0.00007100                                                                            |             |             |   |             |             |             |   |             |             |             |   |             |             |             |   |             |             |             |   |             |            |             |   |             |             |             |   |             |             |             |   |             |             |             |   |             |             |             |   |             |             |             |   |             |             |            |   |             |             |             |   |             |             |             |   |             |             |             |   |             |             |             |   |             |             |             |   |             |             |             |                                                                                                                                                                                                                                                                                                                                                                                                                                                                                                                                                                                                                                                                                                                                                                                                                                                                                                                                                                                                                                                                                                                                                                                                                                                                                                                                                                                                                                                                                                                                                                                                                                                                                                                                                                           |            |             |             |            |            |             |             |            |            |            |            |             |            |             |             |             |            |             |             |             |            |             |             |            |            |             |             |            |            |             |            |            |            |             |             |            |            |            |            |            |            |            |            |                                                                                                                                                                                                                                                                                                                                                                                                                                                                                                                                                                                                                                                                                                                                                                                                                                                                                                                                                                                                                                                                                                                                                                                                                                                                                                                                                                                                                                                                                                                                                                                                                                                                                                                                                                                                                                                                                                                                                                                                                                                                                                                                                                                                                                                                                                                                                                                                                                                                                                                                                                                                                                                                            |   |            |             |             |   |            |             |             |   |            |             |            |   |            |             |            |   |            |             |            |   |            |             |             |   |             |             |             |   |             |             |             |   |             |             |             |   |             |             |             |                                                                                                                                                                                                                                                                                                                                                                                                                                                                                                                                                                                                                                                                                                                                                                                                                                                                                                                                                                                                                                                                                                                                                                                                                                                                                                                                                                                                                                                                                                                                                                                                                                                                                                                                                                            |            |             |             |            |            |             |             |            |            |             |             |             |            |            |            |             |            |             |             |             |            |             |             |            |             |             |             |            |             |             |             |            |             |            |            |            |             |            |            |            |            |            |             |             |             |             |             |             |             |             |             |             |             |             |             |            |             |             |             |            |             |             |             |            |             |             |             |            |             |             |             |             |             |             |             |             |             |             |            |             |             |             |             |             |             |             |             |                                                                                                                                                                                                                                                                                                                                                                                                                                                                                                                                                                                                                                                                                                                                                                                                                                                                                                                                                                                                                                                                                                                                                                                                                                                                                                                                                                                                                                                                                                                                                                                                                                                                                                                                                                                                                                                                                                                                                                                                                                                                                                                                                                                                                                                                                                                                                                                                                                                                                                                                                                                                                                                                         |   |            |             |            |   |            |            |            |   |            |             |            |   |            |            |            |   |            |            |            |   |            |            |             |   |            |            |             |   |            |             |             |   |            |            |             |   |            |             |            |   |            |             |            |   |            |             |             |   |            |             |             |   |            |             |            |   |            |             |            |   |            |             |             |   |             |            |            |   |             |            |            |   |             |            |             |   |             |            |             |   |            |            |            |   |             |             |            |   |             |            |            |   |             |             |             |   |             |             |            |   |             |            |            |   |             |             |             |   |             |             |             |   |             |             |             |   |             |            |            |   |             |             |             |   |             |             |             |
| H                 | -3.88095200                                                                                                                                                                                                                                                                                                                                                                                                                                                                                                                                                                                                                                                                                                                                                                                                                                                                                                                                                                                                                                                                                                                                                                                                                                                                                                                                                                                                                                                                                                                                                                                                                                                                                                                                                                                                                                                                                                                                                                                                                                                                                                                                                                                                                                                                                                                                                                                                                  | -1.89493200                                                                         | 0.88587300                                                                            |             |             |   |             |             |             |   |             |             |             |   |             |             |             |   |             |             |             |   |             |            |             |   |             |             |             |   |             |             |             |   |             |             |             |   |             |             |             |   |             |             |             |   |             |             |            |   |             |             |             |   |             |             |             |   |             |             |             |   |             |             |             |   |             |             |             |   |             |             |             |                                                                                                                                                                                                                                                                                                                                                                                                                                                                                                                                                                                                                                                                                                                                                                                                                                                                                                                                                                                                                                                                                                                                                                                                                                                                                                                                                                                                                                                                                                                                                                                                                                                                                                                                                                           |            |             |             |            |            |             |             |            |            |            |            |             |            |             |             |             |            |             |             |             |            |             |             |            |            |             |             |            |            |             |            |            |            |             |             |            |            |            |            |            |            |            |            |                                                                                                                                                                                                                                                                                                                                                                                                                                                                                                                                                                                                                                                                                                                                                                                                                                                                                                                                                                                                                                                                                                                                                                                                                                                                                                                                                                                                                                                                                                                                                                                                                                                                                                                                                                                                                                                                                                                                                                                                                                                                                                                                                                                                                                                                                                                                                                                                                                                                                                                                                                                                                                                                            |   |            |             |             |   |            |             |             |   |            |             |            |   |            |             |            |   |            |             |            |   |            |             |             |   |             |             |             |   |             |             |             |   |             |             |             |   |             |             |             |                                                                                                                                                                                                                                                                                                                                                                                                                                                                                                                                                                                                                                                                                                                                                                                                                                                                                                                                                                                                                                                                                                                                                                                                                                                                                                                                                                                                                                                                                                                                                                                                                                                                                                                                                                            |            |             |             |            |            |             |             |            |            |             |             |             |            |            |            |             |            |             |             |             |            |             |             |            |             |             |             |            |             |             |             |            |             |            |            |            |             |            |            |            |            |            |             |             |             |             |             |             |             |             |             |             |             |             |             |            |             |             |             |            |             |             |             |            |             |             |             |            |             |             |             |             |             |             |             |             |             |             |            |             |             |             |             |             |             |             |             |                                                                                                                                                                                                                                                                                                                                                                                                                                                                                                                                                                                                                                                                                                                                                                                                                                                                                                                                                                                                                                                                                                                                                                                                                                                                                                                                                                                                                                                                                                                                                                                                                                                                                                                                                                                                                                                                                                                                                                                                                                                                                                                                                                                                                                                                                                                                                                                                                                                                                                                                                                                                                                                                         |   |            |             |            |   |            |            |            |   |            |             |            |   |            |            |            |   |            |            |            |   |            |            |             |   |            |            |             |   |            |             |             |   |            |            |             |   |            |             |            |   |            |             |            |   |            |             |             |   |            |             |             |   |            |             |            |   |            |             |            |   |            |             |             |   |             |            |            |   |             |            |            |   |             |            |             |   |             |            |             |   |            |            |            |   |             |             |            |   |             |            |            |   |             |             |             |   |             |             |            |   |             |            |            |   |             |             |             |   |             |             |             |   |             |             |             |   |             |            |            |   |             |             |             |   |             |             |             |
| H                 | -5.08468400                                                                                                                                                                                                                                                                                                                                                                                                                                                                                                                                                                                                                                                                                                                                                                                                                                                                                                                                                                                                                                                                                                                                                                                                                                                                                                                                                                                                                                                                                                                                                                                                                                                                                                                                                                                                                                                                                                                                                                                                                                                                                                                                                                                                                                                                                                                                                                                                                  | -0.94370500                                                                         | 0.00018800                                                                            |             |             |   |             |             |             |   |             |             |             |   |             |             |             |   |             |             |             |   |             |            |             |   |             |             |             |   |             |             |             |   |             |             |             |   |             |             |             |   |             |             |             |   |             |             |            |   |             |             |             |   |             |             |             |   |             |             |             |   |             |             |             |   |             |             |             |   |             |             |             |                                                                                                                                                                                                                                                                                                                                                                                                                                                                                                                                                                                                                                                                                                                                                                                                                                                                                                                                                                                                                                                                                                                                                                                                                                                                                                                                                                                                                                                                                                                                                                                                                                                                                                                                                                           |            |             |             |            |            |             |             |            |            |            |            |             |            |             |             |             |            |             |             |             |            |             |             |            |            |             |             |            |            |             |            |            |            |             |             |            |            |            |            |            |            |            |            |                                                                                                                                                                                                                                                                                                                                                                                                                                                                                                                                                                                                                                                                                                                                                                                                                                                                                                                                                                                                                                                                                                                                                                                                                                                                                                                                                                                                                                                                                                                                                                                                                                                                                                                                                                                                                                                                                                                                                                                                                                                                                                                                                                                                                                                                                                                                                                                                                                                                                                                                                                                                                                                                            |   |            |             |             |   |            |             |             |   |            |             |            |   |            |             |            |   |            |             |            |   |            |             |             |   |             |             |             |   |             |             |             |   |             |             |             |   |             |             |             |                                                                                                                                                                                                                                                                                                                                                                                                                                                                                                                                                                                                                                                                                                                                                                                                                                                                                                                                                                                                                                                                                                                                                                                                                                                                                                                                                                                                                                                                                                                                                                                                                                                                                                                                                                            |            |             |             |            |            |             |             |            |            |             |             |             |            |            |            |             |            |             |             |             |            |             |             |            |             |             |             |            |             |             |             |            |             |            |            |            |             |            |            |            |            |            |             |             |             |             |             |             |             |             |             |             |             |             |             |            |             |             |             |            |             |             |             |            |             |             |             |            |             |             |             |             |             |             |             |             |             |             |            |             |             |             |             |             |             |             |             |                                                                                                                                                                                                                                                                                                                                                                                                                                                                                                                                                                                                                                                                                                                                                                                                                                                                                                                                                                                                                                                                                                                                                                                                                                                                                                                                                                                                                                                                                                                                                                                                                                                                                                                                                                                                                                                                                                                                                                                                                                                                                                                                                                                                                                                                                                                                                                                                                                                                                                                                                                                                                                                                         |   |            |             |            |   |            |            |            |   |            |             |            |   |            |            |            |   |            |            |            |   |            |            |             |   |            |            |             |   |            |             |             |   |            |            |             |   |            |             |            |   |            |             |            |   |            |             |             |   |            |             |             |   |            |             |            |   |            |             |            |   |            |             |             |   |             |            |            |   |             |            |            |   |             |            |             |   |             |            |             |   |            |            |            |   |             |             |            |   |             |            |            |   |             |             |             |   |             |             |            |   |             |            |            |   |             |             |             |   |             |             |             |   |             |             |             |   |             |            |            |   |             |             |             |   |             |             |             |
| H                 | -3.88112600                                                                                                                                                                                                                                                                                                                                                                                                                                                                                                                                                                                                                                                                                                                                                                                                                                                                                                                                                                                                                                                                                                                                                                                                                                                                                                                                                                                                                                                                                                                                                                                                                                                                                                                                                                                                                                                                                                                                                                                                                                                                                                                                                                                                                                                                                                                                                                                                                  | -1.89486400                                                                         | -0.88580900                                                                           |             |             |   |             |             |             |   |             |             |             |   |             |             |             |   |             |             |             |   |             |            |             |   |             |             |             |   |             |             |             |   |             |             |             |   |             |             |             |   |             |             |             |   |             |             |            |   |             |             |             |   |             |             |             |   |             |             |             |   |             |             |             |   |             |             |             |   |             |             |             |                                                                                                                                                                                                                                                                                                                                                                                                                                                                                                                                                                                                                                                                                                                                                                                                                                                                                                                                                                                                                                                                                                                                                                                                                                                                                                                                                                                                                                                                                                                                                                                                                                                                                                                                                                           |            |             |             |            |            |             |             |            |            |            |            |             |            |             |             |             |            |             |             |             |            |             |             |            |            |             |             |            |            |             |            |            |            |             |             |            |            |            |            |            |            |            |            |                                                                                                                                                                                                                                                                                                                                                                                                                                                                                                                                                                                                                                                                                                                                                                                                                                                                                                                                                                                                                                                                                                                                                                                                                                                                                                                                                                                                                                                                                                                                                                                                                                                                                                                                                                                                                                                                                                                                                                                                                                                                                                                                                                                                                                                                                                                                                                                                                                                                                                                                                                                                                                                                            |   |            |             |             |   |            |             |             |   |            |             |            |   |            |             |            |   |            |             |            |   |            |             |             |   |             |             |             |   |             |             |             |   |             |             |             |   |             |             |             |                                                                                                                                                                                                                                                                                                                                                                                                                                                                                                                                                                                                                                                                                                                                                                                                                                                                                                                                                                                                                                                                                                                                                                                                                                                                                                                                                                                                                                                                                                                                                                                                                                                                                                                                                                            |            |             |             |            |            |             |             |            |            |             |             |             |            |            |            |             |            |             |             |             |            |             |             |            |             |             |             |            |             |             |             |            |             |            |            |            |             |            |            |            |            |            |             |             |             |             |             |             |             |             |             |             |             |             |             |            |             |             |             |            |             |             |             |            |             |             |             |            |             |             |             |             |             |             |             |             |             |             |            |             |             |             |             |             |             |             |             |                                                                                                                                                                                                                                                                                                                                                                                                                                                                                                                                                                                                                                                                                                                                                                                                                                                                                                                                                                                                                                                                                                                                                                                                                                                                                                                                                                                                                                                                                                                                                                                                                                                                                                                                                                                                                                                                                                                                                                                                                                                                                                                                                                                                                                                                                                                                                                                                                                                                                                                                                                                                                                                                         |   |            |             |            |   |            |            |            |   |            |             |            |   |            |            |            |   |            |            |            |   |            |            |             |   |            |            |             |   |            |             |             |   |            |            |             |   |            |             |            |   |            |             |            |   |            |             |             |   |            |             |             |   |            |             |            |   |            |             |            |   |            |             |             |   |             |            |            |   |             |            |            |   |             |            |             |   |             |            |             |   |            |            |            |   |             |             |            |   |             |            |            |   |             |             |             |   |             |             |            |   |             |            |            |   |             |             |             |   |             |             |             |   |             |             |             |   |             |            |            |   |             |             |             |   |             |             |             |
| C                 | -3.33326400                                                                                                                                                                                                                                                                                                                                                                                                                                                                                                                                                                                                                                                                                                                                                                                                                                                                                                                                                                                                                                                                                                                                                                                                                                                                                                                                                                                                                                                                                                                                                                                                                                                                                                                                                                                                                                                                                                                                                                                                                                                                                                                                                                                                                                                                                                                                                                                                                  | 0.74809900                                                                          | -1.26286200                                                                           |             |             |   |             |             |             |   |             |             |             |   |             |             |             |   |             |             |             |   |             |            |             |   |             |             |             |   |             |             |             |   |             |             |             |   |             |             |             |   |             |             |             |   |             |             |            |   |             |             |             |   |             |             |             |   |             |             |             |   |             |             |             |   |             |             |             |   |             |             |             |                                                                                                                                                                                                                                                                                                                                                                                                                                                                                                                                                                                                                                                                                                                                                                                                                                                                                                                                                                                                                                                                                                                                                                                                                                                                                                                                                                                                                                                                                                                                                                                                                                                                                                                                                                           |            |             |             |            |            |             |             |            |            |            |            |             |            |             |             |             |            |             |             |             |            |             |             |            |            |             |             |            |            |             |            |            |            |             |             |            |            |            |            |            |            |            |            |                                                                                                                                                                                                                                                                                                                                                                                                                                                                                                                                                                                                                                                                                                                                                                                                                                                                                                                                                                                                                                                                                                                                                                                                                                                                                                                                                                                                                                                                                                                                                                                                                                                                                                                                                                                                                                                                                                                                                                                                                                                                                                                                                                                                                                                                                                                                                                                                                                                                                                                                                                                                                                                                            |   |            |             |             |   |            |             |             |   |            |             |            |   |            |             |            |   |            |             |            |   |            |             |             |   |             |             |             |   |             |             |             |   |             |             |             |   |             |             |             |                                                                                                                                                                                                                                                                                                                                                                                                                                                                                                                                                                                                                                                                                                                                                                                                                                                                                                                                                                                                                                                                                                                                                                                                                                                                                                                                                                                                                                                                                                                                                                                                                                                                                                                                                                            |            |             |             |            |            |             |             |            |            |             |             |             |            |            |            |             |            |             |             |             |            |             |             |            |             |             |             |            |             |             |             |            |             |            |            |            |             |            |            |            |            |            |             |             |             |             |             |             |             |             |             |             |             |             |             |            |             |             |             |            |             |             |             |            |             |             |             |            |             |             |             |             |             |             |             |             |             |             |            |             |             |             |             |             |             |             |             |                                                                                                                                                                                                                                                                                                                                                                                                                                                                                                                                                                                                                                                                                                                                                                                                                                                                                                                                                                                                                                                                                                                                                                                                                                                                                                                                                                                                                                                                                                                                                                                                                                                                                                                                                                                                                                                                                                                                                                                                                                                                                                                                                                                                                                                                                                                                                                                                                                                                                                                                                                                                                                                                         |   |            |             |            |   |            |            |            |   |            |             |            |   |            |            |            |   |            |            |            |   |            |            |             |   |            |            |             |   |            |             |             |   |            |            |             |   |            |             |            |   |            |             |            |   |            |             |             |   |            |             |             |   |            |             |            |   |            |             |            |   |            |             |             |   |             |            |            |   |             |            |            |   |             |            |             |   |             |            |             |   |            |            |            |   |             |             |            |   |             |            |            |   |             |             |             |   |             |             |            |   |             |            |            |   |             |             |             |   |             |             |             |   |             |             |             |   |             |            |            |   |             |             |             |   |             |             |             |
| H                 | -4.37590900                                                                                                                                                                                                                                                                                                                                                                                                                                                                                                                                                                                                                                                                                                                                                                                                                                                                                                                                                                                                                                                                                                                                                                                                                                                                                                                                                                                                                                                                                                                                                                                                                                                                                                                                                                                                                                                                                                                                                                                                                                                                                                                                                                                                                                                                                                                                                                                                                  | 1.07028800                                                                          | -1.30669200                                                                           |             |             |   |             |             |             |   |             |             |             |   |             |             |             |   |             |             |             |   |             |            |             |   |             |             |             |   |             |             |             |   |             |             |             |   |             |             |             |   |             |             |             |   |             |             |            |   |             |             |             |   |             |             |             |   |             |             |             |   |             |             |             |   |             |             |             |   |             |             |             |                                                                                                                                                                                                                                                                                                                                                                                                                                                                                                                                                                                                                                                                                                                                                                                                                                                                                                                                                                                                                                                                                                                                                                                                                                                                                                                                                                                                                                                                                                                                                                                                                                                                                                                                                                           |            |             |             |            |            |             |             |            |            |            |            |             |            |             |             |             |            |             |             |             |            |             |             |            |            |             |             |            |            |             |            |            |            |             |             |            |            |            |            |            |            |            |            |                                                                                                                                                                                                                                                                                                                                                                                                                                                                                                                                                                                                                                                                                                                                                                                                                                                                                                                                                                                                                                                                                                                                                                                                                                                                                                                                                                                                                                                                                                                                                                                                                                                                                                                                                                                                                                                                                                                                                                                                                                                                                                                                                                                                                                                                                                                                                                                                                                                                                                                                                                                                                                                                            |   |            |             |             |   |            |             |             |   |            |             |            |   |            |             |            |   |            |             |            |   |            |             |             |   |             |             |             |   |             |             |             |   |             |             |             |   |             |             |             |                                                                                                                                                                                                                                                                                                                                                                                                                                                                                                                                                                                                                                                                                                                                                                                                                                                                                                                                                                                                                                                                                                                                                                                                                                                                                                                                                                                                                                                                                                                                                                                                                                                                                                                                                                            |            |             |             |            |            |             |             |            |            |             |             |             |            |            |            |             |            |             |             |             |            |             |             |            |             |             |             |            |             |             |             |            |             |            |            |            |             |            |            |            |            |            |             |             |             |             |             |             |             |             |             |             |             |             |             |            |             |             |             |            |             |             |             |            |             |             |             |            |             |             |             |             |             |             |             |             |             |             |            |             |             |             |             |             |             |             |             |                                                                                                                                                                                                                                                                                                                                                                                                                                                                                                                                                                                                                                                                                                                                                                                                                                                                                                                                                                                                                                                                                                                                                                                                                                                                                                                                                                                                                                                                                                                                                                                                                                                                                                                                                                                                                                                                                                                                                                                                                                                                                                                                                                                                                                                                                                                                                                                                                                                                                                                                                                                                                                                                         |   |            |             |            |   |            |            |            |   |            |             |            |   |            |            |            |   |            |            |            |   |            |            |             |   |            |            |             |   |            |             |             |   |            |            |             |   |            |             |            |   |            |             |            |   |            |             |             |   |            |             |             |   |            |             |            |   |            |             |            |   |            |             |             |   |             |            |            |   |             |            |            |   |             |            |             |   |             |            |             |   |            |            |            |   |             |             |            |   |             |            |            |   |             |             |             |   |             |             |            |   |             |            |            |   |             |             |             |   |             |             |             |   |             |             |             |   |             |            |            |   |             |             |             |   |             |             |             |
| H                 | -2.68974500                                                                                                                                                                                                                                                                                                                                                                                                                                                                                                                                                                                                                                                                                                                                                                                                                                                                                                                                                                                                                                                                                                                                                                                                                                                                                                                                                                                                                                                                                                                                                                                                                                                                                                                                                                                                                                                                                                                                                                                                                                                                                                                                                                                                                                                                                                                                                                                                                  | 1.62398100                                                                          | -1.27628500                                                                           |             |             |   |             |             |             |   |             |             |             |   |             |             |             |   |             |             |             |   |             |            |             |   |             |             |             |   |             |             |             |   |             |             |             |   |             |             |             |   |             |             |             |   |             |             |            |   |             |             |             |   |             |             |             |   |             |             |             |   |             |             |             |   |             |             |             |   |             |             |             |                                                                                                                                                                                                                                                                                                                                                                                                                                                                                                                                                                                                                                                                                                                                                                                                                                                                                                                                                                                                                                                                                                                                                                                                                                                                                                                                                                                                                                                                                                                                                                                                                                                                                                                                                                           |            |             |             |            |            |             |             |            |            |            |            |             |            |             |             |             |            |             |             |             |            |             |             |            |            |             |             |            |            |             |            |            |            |             |             |            |            |            |            |            |            |            |            |                                                                                                                                                                                                                                                                                                                                                                                                                                                                                                                                                                                                                                                                                                                                                                                                                                                                                                                                                                                                                                                                                                                                                                                                                                                                                                                                                                                                                                                                                                                                                                                                                                                                                                                                                                                                                                                                                                                                                                                                                                                                                                                                                                                                                                                                                                                                                                                                                                                                                                                                                                                                                                                                            |   |            |             |             |   |            |             |             |   |            |             |            |   |            |             |            |   |            |             |            |   |            |             |             |   |             |             |             |   |             |             |             |   |             |             |             |   |             |             |             |                                                                                                                                                                                                                                                                                                                                                                                                                                                                                                                                                                                                                                                                                                                                                                                                                                                                                                                                                                                                                                                                                                                                                                                                                                                                                                                                                                                                                                                                                                                                                                                                                                                                                                                                                                            |            |             |             |            |            |             |             |            |            |             |             |             |            |            |            |             |            |             |             |             |            |             |             |            |             |             |             |            |             |             |             |            |             |            |            |            |             |            |            |            |            |            |             |             |             |             |             |             |             |             |             |             |             |             |             |            |             |             |             |            |             |             |             |            |             |             |             |            |             |             |             |             |             |             |             |             |             |             |            |             |             |             |             |             |             |             |             |                                                                                                                                                                                                                                                                                                                                                                                                                                                                                                                                                                                                                                                                                                                                                                                                                                                                                                                                                                                                                                                                                                                                                                                                                                                                                                                                                                                                                                                                                                                                                                                                                                                                                                                                                                                                                                                                                                                                                                                                                                                                                                                                                                                                                                                                                                                                                                                                                                                                                                                                                                                                                                                                         |   |            |             |            |   |            |            |            |   |            |             |            |   |            |            |            |   |            |            |            |   |            |            |             |   |            |            |             |   |            |             |             |   |            |            |             |   |            |             |            |   |            |             |            |   |            |             |             |   |            |             |             |   |            |             |            |   |            |             |            |   |            |             |             |   |             |            |            |   |             |            |            |   |             |            |             |   |             |            |             |   |            |            |            |   |             |             |            |   |             |            |            |   |             |             |             |   |             |             |            |   |             |            |            |   |             |             |             |   |             |             |             |   |             |             |             |   |             |            |            |   |             |             |             |   |             |             |             |
| H                 | -3.12629300                                                                                                                                                                                                                                                                                                                                                                                                                                                                                                                                                                                                                                                                                                                                                                                                                                                                                                                                                                                                                                                                                                                                                                                                                                                                                                                                                                                                                                                                                                                                                                                                                                                                                                                                                                                                                                                                                                                                                                                                                                                                                                                                                                                                                                                                                                                                                                                                                  | 0.14393000                                                                          | -2.14880300                                                                           |             |             |   |             |             |             |   |             |             |             |   |             |             |             |   |             |             |             |   |             |            |             |   |             |             |             |   |             |             |             |   |             |             |             |   |             |             |             |   |             |             |             |   |             |             |            |   |             |             |             |   |             |             |             |   |             |             |             |   |             |             |             |   |             |             |             |   |             |             |             |                                                                                                                                                                                                                                                                                                                                                                                                                                                                                                                                                                                                                                                                                                                                                                                                                                                                                                                                                                                                                                                                                                                                                                                                                                                                                                                                                                                                                                                                                                                                                                                                                                                                                                                                                                           |            |             |             |            |            |             |             |            |            |            |            |             |            |             |             |             |            |             |             |             |            |             |             |            |            |             |             |            |            |             |            |            |            |             |             |            |            |            |            |            |            |            |            |                                                                                                                                                                                                                                                                                                                                                                                                                                                                                                                                                                                                                                                                                                                                                                                                                                                                                                                                                                                                                                                                                                                                                                                                                                                                                                                                                                                                                                                                                                                                                                                                                                                                                                                                                                                                                                                                                                                                                                                                                                                                                                                                                                                                                                                                                                                                                                                                                                                                                                                                                                                                                                                                            |   |            |             |             |   |            |             |             |   |            |             |            |   |            |             |            |   |            |             |            |   |            |             |             |   |             |             |             |   |             |             |             |   |             |             |             |   |             |             |             |                                                                                                                                                                                                                                                                                                                                                                                                                                                                                                                                                                                                                                                                                                                                                                                                                                                                                                                                                                                                                                                                                                                                                                                                                                                                                                                                                                                                                                                                                                                                                                                                                                                                                                                                                                            |            |             |             |            |            |             |             |            |            |             |             |             |            |            |            |             |            |             |             |             |            |             |             |            |             |             |             |            |             |             |             |            |             |            |            |            |             |            |            |            |            |            |             |             |             |             |             |             |             |             |             |             |             |             |             |            |             |             |             |            |             |             |             |            |             |             |             |            |             |             |             |             |             |             |             |             |             |             |            |             |             |             |             |             |             |             |             |                                                                                                                                                                                                                                                                                                                                                                                                                                                                                                                                                                                                                                                                                                                                                                                                                                                                                                                                                                                                                                                                                                                                                                                                                                                                                                                                                                                                                                                                                                                                                                                                                                                                                                                                                                                                                                                                                                                                                                                                                                                                                                                                                                                                                                                                                                                                                                                                                                                                                                                                                                                                                                                                         |   |            |             |            |   |            |            |            |   |            |             |            |   |            |            |            |   |            |            |            |   |            |            |             |   |            |            |             |   |            |             |             |   |            |            |             |   |            |             |            |   |            |             |            |   |            |             |             |   |            |             |             |   |            |             |            |   |            |             |            |   |            |             |             |   |             |            |            |   |             |            |            |   |             |            |             |   |             |            |             |   |            |            |            |   |             |             |            |   |             |            |            |   |             |             |             |   |             |             |            |   |             |            |            |   |             |             |             |   |             |             |             |   |             |             |             |   |             |            |            |   |             |             |             |   |             |             |             |
| C                 | -3.33312200                                                                                                                                                                                                                                                                                                                                                                                                                                                                                                                                                                                                                                                                                                                                                                                                                                                                                                                                                                                                                                                                                                                                                                                                                                                                                                                                                                                                                                                                                                                                                                                                                                                                                                                                                                                                                                                                                                                                                                                                                                                                                                                                                                                                                                                                                                                                                                                                                  | 0.74806800                                                                          | 1.26295000                                                                            |             |             |   |             |             |             |   |             |             |             |   |             |             |             |   |             |             |             |   |             |            |             |   |             |             |             |   |             |             |             |   |             |             |             |   |             |             |             |   |             |             |             |   |             |             |            |   |             |             |             |   |             |             |             |   |             |             |             |   |             |             |             |   |             |             |             |   |             |             |             |                                                                                                                                                                                                                                                                                                                                                                                                                                                                                                                                                                                                                                                                                                                                                                                                                                                                                                                                                                                                                                                                                                                                                                                                                                                                                                                                                                                                                                                                                                                                                                                                                                                                                                                                                                           |            |             |             |            |            |             |             |            |            |            |            |             |            |             |             |             |            |             |             |             |            |             |             |            |            |             |             |            |            |             |            |            |            |             |             |            |            |            |            |            |            |            |            |                                                                                                                                                                                                                                                                                                                                                                                                                                                                                                                                                                                                                                                                                                                                                                                                                                                                                                                                                                                                                                                                                                                                                                                                                                                                                                                                                                                                                                                                                                                                                                                                                                                                                                                                                                                                                                                                                                                                                                                                                                                                                                                                                                                                                                                                                                                                                                                                                                                                                                                                                                                                                                                                            |   |            |             |             |   |            |             |             |   |            |             |            |   |            |             |            |   |            |             |            |   |            |             |             |   |             |             |             |   |             |             |             |   |             |             |             |   |             |             |             |                                                                                                                                                                                                                                                                                                                                                                                                                                                                                                                                                                                                                                                                                                                                                                                                                                                                                                                                                                                                                                                                                                                                                                                                                                                                                                                                                                                                                                                                                                                                                                                                                                                                                                                                                                            |            |             |             |            |            |             |             |            |            |             |             |             |            |            |            |             |            |             |             |             |            |             |             |            |             |             |             |            |             |             |             |            |             |            |            |            |             |            |            |            |            |            |             |             |             |             |             |             |             |             |             |             |             |             |             |            |             |             |             |            |             |             |             |            |             |             |             |            |             |             |             |             |             |             |             |             |             |             |            |             |             |             |             |             |             |             |             |                                                                                                                                                                                                                                                                                                                                                                                                                                                                                                                                                                                                                                                                                                                                                                                                                                                                                                                                                                                                                                                                                                                                                                                                                                                                                                                                                                                                                                                                                                                                                                                                                                                                                                                                                                                                                                                                                                                                                                                                                                                                                                                                                                                                                                                                                                                                                                                                                                                                                                                                                                                                                                                                         |   |            |             |            |   |            |            |            |   |            |             |            |   |            |            |            |   |            |            |            |   |            |            |             |   |            |            |             |   |            |             |             |   |            |            |             |   |            |             |            |   |            |             |            |   |            |             |             |   |            |             |             |   |            |             |            |   |            |             |            |   |            |             |             |   |             |            |            |   |             |            |            |   |             |            |             |   |             |            |             |   |            |            |            |   |             |             |            |   |             |            |            |   |             |             |             |   |             |             |            |   |             |            |            |   |             |             |             |   |             |             |             |   |             |             |             |   |             |            |            |   |             |             |             |   |             |             |             |
| H                 | -3.12619300                                                                                                                                                                                                                                                                                                                                                                                                                                                                                                                                                                                                                                                                                                                                                                                                                                                                                                                                                                                                                                                                                                                                                                                                                                                                                                                                                                                                                                                                                                                                                                                                                                                                                                                                                                                                                                                                                                                                                                                                                                                                                                                                                                                                                                                                                                                                                                                                                  | 0.14386400                                                                          | 2.14887600                                                                            |             |             |   |             |             |             |   |             |             |             |   |             |             |             |   |             |             |             |   |             |            |             |   |             |             |             |   |             |             |             |   |             |             |             |   |             |             |             |   |             |             |             |   |             |             |            |   |             |             |             |   |             |             |             |   |             |             |             |   |             |             |             |   |             |             |             |   |             |             |             |                                                                                                                                                                                                                                                                                                                                                                                                                                                                                                                                                                                                                                                                                                                                                                                                                                                                                                                                                                                                                                                                                                                                                                                                                                                                                                                                                                                                                                                                                                                                                                                                                                                                                                                                                                           |            |             |             |            |            |             |             |            |            |            |            |             |            |             |             |             |            |             |             |             |            |             |             |            |            |             |             |            |            |             |            |            |            |             |             |            |            |            |            |            |            |            |            |                                                                                                                                                                                                                                                                                                                                                                                                                                                                                                                                                                                                                                                                                                                                                                                                                                                                                                                                                                                                                                                                                                                                                                                                                                                                                                                                                                                                                                                                                                                                                                                                                                                                                                                                                                                                                                                                                                                                                                                                                                                                                                                                                                                                                                                                                                                                                                                                                                                                                                                                                                                                                                                                            |   |            |             |             |   |            |             |             |   |            |             |            |   |            |             |            |   |            |             |            |   |            |             |             |   |             |             |             |   |             |             |             |   |             |             |             |   |             |             |             |                                                                                                                                                                                                                                                                                                                                                                                                                                                                                                                                                                                                                                                                                                                                                                                                                                                                                                                                                                                                                                                                                                                                                                                                                                                                                                                                                                                                                                                                                                                                                                                                                                                                                                                                                                            |            |             |             |            |            |             |             |            |            |             |             |             |            |            |            |             |            |             |             |             |            |             |             |            |             |             |             |            |             |             |             |            |             |            |            |            |             |            |            |            |            |            |             |             |             |             |             |             |             |             |             |             |             |             |             |            |             |             |             |            |             |             |             |            |             |             |             |            |             |             |             |             |             |             |             |             |             |             |            |             |             |             |             |             |             |             |             |                                                                                                                                                                                                                                                                                                                                                                                                                                                                                                                                                                                                                                                                                                                                                                                                                                                                                                                                                                                                                                                                                                                                                                                                                                                                                                                                                                                                                                                                                                                                                                                                                                                                                                                                                                                                                                                                                                                                                                                                                                                                                                                                                                                                                                                                                                                                                                                                                                                                                                                                                                                                                                                                         |   |            |             |            |   |            |            |            |   |            |             |            |   |            |            |            |   |            |            |            |   |            |            |             |   |            |            |             |   |            |             |             |   |            |            |             |   |            |             |            |   |            |             |            |   |            |             |             |   |            |             |             |   |            |             |            |   |            |             |            |   |            |             |             |   |             |            |            |   |             |            |            |   |             |            |             |   |             |            |             |   |            |            |            |   |             |             |            |   |             |            |            |   |             |             |             |   |             |             |            |   |             |            |            |   |             |             |             |   |             |             |             |   |             |             |             |   |             |            |            |   |             |             |             |   |             |             |             |
| H                 | -2.68954000                                                                                                                                                                                                                                                                                                                                                                                                                                                                                                                                                                                                                                                                                                                                                                                                                                                                                                                                                                                                                                                                                                                                                                                                                                                                                                                                                                                                                                                                                                                                                                                                                                                                                                                                                                                                                                                                                                                                                                                                                                                                                                                                                                                                                                                                                                                                                                                                                  | 1.62390300                                                                          | 1.27636800                                                                            |             |             |   |             |             |             |   |             |             |             |   |             |             |             |   |             |             |             |   |             |            |             |   |             |             |             |   |             |             |             |   |             |             |             |   |             |             |             |   |             |             |             |   |             |             |            |   |             |             |             |   |             |             |             |   |             |             |             |   |             |             |             |   |             |             |             |   |             |             |             |                                                                                                                                                                                                                                                                                                                                                                                                                                                                                                                                                                                                                                                                                                                                                                                                                                                                                                                                                                                                                                                                                                                                                                                                                                                                                                                                                                                                                                                                                                                                                                                                                                                                                                                                                                           |            |             |             |            |            |             |             |            |            |            |            |             |            |             |             |             |            |             |             |             |            |             |             |            |            |             |             |            |            |             |            |            |            |             |             |            |            |            |            |            |            |            |            |                                                                                                                                                                                                                                                                                                                                                                                                                                                                                                                                                                                                                                                                                                                                                                                                                                                                                                                                                                                                                                                                                                                                                                                                                                                                                                                                                                                                                                                                                                                                                                                                                                                                                                                                                                                                                                                                                                                                                                                                                                                                                                                                                                                                                                                                                                                                                                                                                                                                                                                                                                                                                                                                            |   |            |             |             |   |            |             |             |   |            |             |            |   |            |             |            |   |            |             |            |   |            |             |             |   |             |             |             |   |             |             |             |   |             |             |             |   |             |             |             |                                                                                                                                                                                                                                                                                                                                                                                                                                                                                                                                                                                                                                                                                                                                                                                                                                                                                                                                                                                                                                                                                                                                                                                                                                                                                                                                                                                                                                                                                                                                                                                                                                                                                                                                                                            |            |             |             |            |            |             |             |            |            |             |             |             |            |            |            |             |            |             |             |             |            |             |             |            |             |             |             |            |             |             |             |            |             |            |            |            |             |            |            |            |            |            |             |             |             |             |             |             |             |             |             |             |             |             |             |            |             |             |             |            |             |             |             |            |             |             |             |            |             |             |             |             |             |             |             |             |             |             |            |             |             |             |             |             |             |             |             |                                                                                                                                                                                                                                                                                                                                                                                                                                                                                                                                                                                                                                                                                                                                                                                                                                                                                                                                                                                                                                                                                                                                                                                                                                                                                                                                                                                                                                                                                                                                                                                                                                                                                                                                                                                                                                                                                                                                                                                                                                                                                                                                                                                                                                                                                                                                                                                                                                                                                                                                                                                                                                                                         |   |            |             |            |   |            |            |            |   |            |             |            |   |            |            |            |   |            |            |            |   |            |            |             |   |            |            |             |   |            |             |             |   |            |            |             |   |            |             |            |   |            |             |            |   |            |             |             |   |            |             |             |   |            |             |            |   |            |             |            |   |            |             |             |   |             |            |            |   |             |            |            |   |             |            |             |   |             |            |             |   |            |            |            |   |             |             |            |   |             |            |            |   |             |             |             |   |             |             |            |   |             |            |            |   |             |             |             |   |             |             |             |   |             |             |             |   |             |            |            |   |             |             |             |   |             |             |             |
| H                 | -4.37573600                                                                                                                                                                                                                                                                                                                                                                                                                                                                                                                                                                                                                                                                                                                                                                                                                                                                                                                                                                                                                                                                                                                                                                                                                                                                                                                                                                                                                                                                                                                                                                                                                                                                                                                                                                                                                                                                                                                                                                                                                                                                                                                                                                                                                                                                                                                                                                                                                  | 1.07036300                                                                          | 1.30683400                                                                            |             |             |   |             |             |             |   |             |             |             |   |             |             |             |   |             |             |             |   |             |            |             |   |             |             |             |   |             |             |             |   |             |             |             |   |             |             |             |   |             |             |             |   |             |             |            |   |             |             |             |   |             |             |             |   |             |             |             |   |             |             |             |   |             |             |             |   |             |             |             |                                                                                                                                                                                                                                                                                                                                                                                                                                                                                                                                                                                                                                                                                                                                                                                                                                                                                                                                                                                                                                                                                                                                                                                                                                                                                                                                                                                                                                                                                                                                                                                                                                                                                                                                                                           |            |             |             |            |            |             |             |            |            |            |            |             |            |             |             |             |            |             |             |             |            |             |             |            |            |             |             |            |            |             |            |            |            |             |             |            |            |            |            |            |            |            |            |                                                                                                                                                                                                                                                                                                                                                                                                                                                                                                                                                                                                                                                                                                                                                                                                                                                                                                                                                                                                                                                                                                                                                                                                                                                                                                                                                                                                                                                                                                                                                                                                                                                                                                                                                                                                                                                                                                                                                                                                                                                                                                                                                                                                                                                                                                                                                                                                                                                                                                                                                                                                                                                                            |   |            |             |             |   |            |             |             |   |            |             |            |   |            |             |            |   |            |             |            |   |            |             |             |   |             |             |             |   |             |             |             |   |             |             |             |   |             |             |             |                                                                                                                                                                                                                                                                                                                                                                                                                                                                                                                                                                                                                                                                                                                                                                                                                                                                                                                                                                                                                                                                                                                                                                                                                                                                                                                                                                                                                                                                                                                                                                                                                                                                                                                                                                            |            |             |             |            |            |             |             |            |            |             |             |             |            |            |            |             |            |             |             |             |            |             |             |            |             |             |             |            |             |             |             |            |             |            |            |            |             |            |            |            |            |            |             |             |             |             |             |             |             |             |             |             |             |             |             |            |             |             |             |            |             |             |             |            |             |             |             |            |             |             |             |             |             |             |             |             |             |             |            |             |             |             |             |             |             |             |             |                                                                                                                                                                                                                                                                                                                                                                                                                                                                                                                                                                                                                                                                                                                                                                                                                                                                                                                                                                                                                                                                                                                                                                                                                                                                                                                                                                                                                                                                                                                                                                                                                                                                                                                                                                                                                                                                                                                                                                                                                                                                                                                                                                                                                                                                                                                                                                                                                                                                                                                                                                                                                                                                         |   |            |             |            |   |            |            |            |   |            |             |            |   |            |            |            |   |            |            |            |   |            |            |             |   |            |            |             |   |            |             |             |   |            |            |             |   |            |             |            |   |            |             |            |   |            |             |             |   |            |             |             |   |            |             |            |   |            |             |            |   |            |             |             |   |             |            |            |   |             |            |            |   |             |            |             |   |             |            |             |   |            |            |            |   |             |             |            |   |             |            |            |   |             |             |             |   |             |             |            |   |             |            |            |   |             |             |             |   |             |             |             |   |             |             |             |   |             |            |            |   |             |             |             |   |             |             |             |
| O                 | -1.80010100                                                                                                                                                                                                                                                                                                                                                                                                                                                                                                                                                                                                                                                                                                                                                                                                                                                                                                                                                                                                                                                                                                                                                                                                                                                                                                                                                                                                                                                                                                                                                                                                                                                                                                                                                                                                                                                                                                                                                                                                                                                                                                                                                                                                                                                                                                                                                                                                                  | -0.68410600                                                                         | -0.00006700                                                                           |             |             |   |             |             |             |   |             |             |             |   |             |             |             |   |             |             |             |   |             |            |             |   |             |             |             |   |             |             |             |   |             |             |             |   |             |             |             |   |             |             |             |   |             |             |            |   |             |             |             |   |             |             |             |   |             |             |             |   |             |             |             |   |             |             |             |   |             |             |             |                                                                                                                                                                                                                                                                                                                                                                                                                                                                                                                                                                                                                                                                                                                                                                                                                                                                                                                                                                                                                                                                                                                                                                                                                                                                                                                                                                                                                                                                                                                                                                                                                                                                                                                                                                           |            |             |             |            |            |             |             |            |            |            |            |             |            |             |             |             |            |             |             |             |            |             |             |            |            |             |             |            |            |             |            |            |            |             |             |            |            |            |            |            |            |            |            |                                                                                                                                                                                                                                                                                                                                                                                                                                                                                                                                                                                                                                                                                                                                                                                                                                                                                                                                                                                                                                                                                                                                                                                                                                                                                                                                                                                                                                                                                                                                                                                                                                                                                                                                                                                                                                                                                                                                                                                                                                                                                                                                                                                                                                                                                                                                                                                                                                                                                                                                                                                                                                                                            |   |            |             |             |   |            |             |             |   |            |             |            |   |            |             |            |   |            |             |            |   |            |             |             |   |             |             |             |   |             |             |             |   |             |             |             |   |             |             |             |                                                                                                                                                                                                                                                                                                                                                                                                                                                                                                                                                                                                                                                                                                                                                                                                                                                                                                                                                                                                                                                                                                                                                                                                                                                                                                                                                                                                                                                                                                                                                                                                                                                                                                                                                                            |            |             |             |            |            |             |             |            |            |             |             |             |            |            |            |             |            |             |             |             |            |             |             |            |             |             |             |            |             |             |             |            |             |            |            |            |             |            |            |            |            |            |             |             |             |             |             |             |             |             |             |             |             |             |             |            |             |             |             |            |             |             |             |            |             |             |             |            |             |             |             |             |             |             |             |             |             |             |            |             |             |             |             |             |             |             |             |                                                                                                                                                                                                                                                                                                                                                                                                                                                                                                                                                                                                                                                                                                                                                                                                                                                                                                                                                                                                                                                                                                                                                                                                                                                                                                                                                                                                                                                                                                                                                                                                                                                                                                                                                                                                                                                                                                                                                                                                                                                                                                                                                                                                                                                                                                                                                                                                                                                                                                                                                                                                                                                                         |   |            |             |            |   |            |            |            |   |            |             |            |   |            |            |            |   |            |            |            |   |            |            |             |   |            |            |             |   |            |             |             |   |            |            |             |   |            |             |            |   |            |             |            |   |            |             |             |   |            |             |             |   |            |             |            |   |            |             |            |   |            |             |             |   |             |            |            |   |             |            |            |   |             |            |             |   |             |            |             |   |            |            |            |   |             |             |            |   |             |            |            |   |             |             |             |   |             |             |            |   |             |            |            |   |             |             |             |   |             |             |             |   |             |             |             |   |             |            |            |   |             |             |             |   |             |             |             |
| O                 | -0.62418900                                                                                                                                                                                                                                                                                                                                                                                                                                                                                                                                                                                                                                                                                                                                                                                                                                                                                                                                                                                                                                                                                                                                                                                                                                                                                                                                                                                                                                                                                                                                                                                                                                                                                                                                                                                                                                                                                                                                                                                                                                                                                                                                                                                                                                                                                                                                                                                                                  | 0.05923400                                                                          | -0.00008000                                                                           |             |             |   |             |             |             |   |             |             |             |   |             |             |             |   |             |             |             |   |             |            |             |   |             |             |             |   |             |             |             |   |             |             |             |   |             |             |             |   |             |             |             |   |             |             |            |   |             |             |             |   |             |             |             |   |             |             |             |   |             |             |             |   |             |             |             |   |             |             |             |                                                                                                                                                                                                                                                                                                                                                                                                                                                                                                                                                                                                                                                                                                                                                                                                                                                                                                                                                                                                                                                                                                                                                                                                                                                                                                                                                                                                                                                                                                                                                                                                                                                                                                                                                                           |            |             |             |            |            |             |             |            |            |            |            |             |            |             |             |             |            |             |             |             |            |             |             |            |            |             |             |            |            |             |            |            |            |             |             |            |            |            |            |            |            |            |            |                                                                                                                                                                                                                                                                                                                                                                                                                                                                                                                                                                                                                                                                                                                                                                                                                                                                                                                                                                                                                                                                                                                                                                                                                                                                                                                                                                                                                                                                                                                                                                                                                                                                                                                                                                                                                                                                                                                                                                                                                                                                                                                                                                                                                                                                                                                                                                                                                                                                                                                                                                                                                                                                            |   |            |             |             |   |            |             |             |   |            |             |            |   |            |             |            |   |            |             |            |   |            |             |             |   |             |             |             |   |             |             |             |   |             |             |             |   |             |             |             |                                                                                                                                                                                                                                                                                                                                                                                                                                                                                                                                                                                                                                                                                                                                                                                                                                                                                                                                                                                                                                                                                                                                                                                                                                                                                                                                                                                                                                                                                                                                                                                                                                                                                                                                                                            |            |             |             |            |            |             |             |            |            |             |             |             |            |            |            |             |            |             |             |             |            |             |             |            |             |             |             |            |             |             |             |            |             |            |            |            |             |            |            |            |            |            |             |             |             |             |             |             |             |             |             |             |             |             |             |            |             |             |             |            |             |             |             |            |             |             |             |            |             |             |             |             |             |             |             |             |             |             |            |             |             |             |             |             |             |             |             |                                                                                                                                                                                                                                                                                                                                                                                                                                                                                                                                                                                                                                                                                                                                                                                                                                                                                                                                                                                                                                                                                                                                                                                                                                                                                                                                                                                                                                                                                                                                                                                                                                                                                                                                                                                                                                                                                                                                                                                                                                                                                                                                                                                                                                                                                                                                                                                                                                                                                                                                                                                                                                                                         |   |            |             |            |   |            |            |            |   |            |             |            |   |            |            |            |   |            |            |            |   |            |            |             |   |            |            |             |   |            |             |             |   |            |            |             |   |            |             |            |   |            |             |            |   |            |             |             |   |            |             |             |   |            |             |            |   |            |             |            |   |            |             |             |   |             |            |            |   |             |            |            |   |             |            |             |   |             |            |             |   |            |            |            |   |             |             |            |   |             |            |            |   |             |             |             |   |             |             |            |   |             |            |            |   |             |             |             |   |             |             |             |   |             |             |             |   |             |            |            |   |             |             |             |   |             |             |             |
| O                 | -0.66828400                                                                                                                                                                                                                                                                                                                                                                                                                                                                                                                                                                                                                                                                                                                                                                                                                                                                                                                                                                                                                                                                                                                                                                                                                                                                                                                                                                                                                                                                                                                                                                                                                                                                                                                                                                                                                                                                                                                                                                                                                                                                                                                                                                                                                                                                                                                                                                                                                  | 1.29929900                                                                          | -0.00015100                                                                           |             |             |   |             |             |             |   |             |             |             |   |             |             |             |   |             |             |             |   |             |            |             |   |             |             |             |   |             |             |             |   |             |             |             |   |             |             |             |   |             |             |             |   |             |             |            |   |             |             |             |   |             |             |             |   |             |             |             |   |             |             |             |   |             |             |             |   |             |             |             |                                                                                                                                                                                                                                                                                                                                                                                                                                                                                                                                                                                                                                                                                                                                                                                                                                                                                                                                                                                                                                                                                                                                                                                                                                                                                                                                                                                                                                                                                                                                                                                                                                                                                                                                                                           |            |             |             |            |            |             |             |            |            |            |            |             |            |             |             |             |            |             |             |             |            |             |             |            |            |             |             |            |            |             |            |            |            |             |             |            |            |            |            |            |            |            |            |                                                                                                                                                                                                                                                                                                                                                                                                                                                                                                                                                                                                                                                                                                                                                                                                                                                                                                                                                                                                                                                                                                                                                                                                                                                                                                                                                                                                                                                                                                                                                                                                                                                                                                                                                                                                                                                                                                                                                                                                                                                                                                                                                                                                                                                                                                                                                                                                                                                                                                                                                                                                                                                                            |   |            |             |             |   |            |             |             |   |            |             |            |   |            |             |            |   |            |             |            |   |            |             |             |   |             |             |             |   |             |             |             |   |             |             |             |   |             |             |             |                                                                                                                                                                                                                                                                                                                                                                                                                                                                                                                                                                                                                                                                                                                                                                                                                                                                                                                                                                                                                                                                                                                                                                                                                                                                                                                                                                                                                                                                                                                                                                                                                                                                                                                                                                            |            |             |             |            |            |             |             |            |            |             |             |             |            |            |            |             |            |             |             |             |            |             |             |            |             |             |             |            |             |             |             |            |             |            |            |            |             |            |            |            |            |            |             |             |             |             |             |             |             |             |             |             |             |             |             |            |             |             |             |            |             |             |             |            |             |             |             |            |             |             |             |             |             |             |             |             |             |             |            |             |             |             |             |             |             |             |             |                                                                                                                                                                                                                                                                                                                                                                                                                                                                                                                                                                                                                                                                                                                                                                                                                                                                                                                                                                                                                                                                                                                                                                                                                                                                                                                                                                                                                                                                                                                                                                                                                                                                                                                                                                                                                                                                                                                                                                                                                                                                                                                                                                                                                                                                                                                                                                                                                                                                                                                                                                                                                                                                         |   |            |             |            |   |            |            |            |   |            |             |            |   |            |            |            |   |            |            |            |   |            |            |             |   |            |            |             |   |            |             |             |   |            |            |             |   |            |             |            |   |            |             |            |   |            |             |             |   |            |             |             |   |            |             |            |   |            |             |            |   |            |             |             |   |             |            |            |   |             |            |            |   |             |            |             |   |             |            |             |   |            |            |            |   |             |             |            |   |             |            |            |   |             |             |             |   |             |             |            |   |             |            |            |   |             |             |             |   |             |             |             |   |             |             |             |   |             |            |            |   |             |             |             |   |             |             |             |
| C                 | 0.49439600                                                                                                                                                                                                                                                                                                                                                                                                                                                                                                                                                                                                                                                                                                                                                                                                                                                                                                                                                                                                                                                                                                                                                                                                                                                                                                                                                                                                                                                                                                                                                                                                                                                                                                                                                                                                                                                                                                                                                                                                                                                                                                                                                                                                                                                                                                                                                                                                                   | -0.78010300                                                                         | -0.00003100                                                                           |             |             |   |             |             |             |   |             |             |             |   |             |             |             |   |             |             |             |   |             |            |             |   |             |             |             |   |             |             |             |   |             |             |             |   |             |             |             |   |             |             |             |   |             |             |            |   |             |             |             |   |             |             |             |   |             |             |             |   |             |             |             |   |             |             |             |   |             |             |             |                                                                                                                                                                                                                                                                                                                                                                                                                                                                                                                                                                                                                                                                                                                                                                                                                                                                                                                                                                                                                                                                                                                                                                                                                                                                                                                                                                                                                                                                                                                                                                                                                                                                                                                                                                           |            |             |             |            |            |             |             |            |            |            |            |             |            |             |             |             |            |             |             |             |            |             |             |            |            |             |             |            |            |             |            |            |            |             |             |            |            |            |            |            |            |            |            |                                                                                                                                                                                                                                                                                                                                                                                                                                                                                                                                                                                                                                                                                                                                                                                                                                                                                                                                                                                                                                                                                                                                                                                                                                                                                                                                                                                                                                                                                                                                                                                                                                                                                                                                                                                                                                                                                                                                                                                                                                                                                                                                                                                                                                                                                                                                                                                                                                                                                                                                                                                                                                                                            |   |            |             |             |   |            |             |             |   |            |             |            |   |            |             |            |   |            |             |            |   |            |             |             |   |             |             |             |   |             |             |             |   |             |             |             |   |             |             |             |                                                                                                                                                                                                                                                                                                                                                                                                                                                                                                                                                                                                                                                                                                                                                                                                                                                                                                                                                                                                                                                                                                                                                                                                                                                                                                                                                                                                                                                                                                                                                                                                                                                                                                                                                                            |            |             |             |            |            |             |             |            |            |             |             |             |            |            |            |             |            |             |             |             |            |             |             |            |             |             |             |            |             |             |             |            |             |            |            |            |             |            |            |            |            |            |             |             |             |             |             |             |             |             |             |             |             |             |             |            |             |             |             |            |             |             |             |            |             |             |             |            |             |             |             |             |             |             |             |             |             |             |            |             |             |             |             |             |             |             |             |                                                                                                                                                                                                                                                                                                                                                                                                                                                                                                                                                                                                                                                                                                                                                                                                                                                                                                                                                                                                                                                                                                                                                                                                                                                                                                                                                                                                                                                                                                                                                                                                                                                                                                                                                                                                                                                                                                                                                                                                                                                                                                                                                                                                                                                                                                                                                                                                                                                                                                                                                                                                                                                                         |   |            |             |            |   |            |            |            |   |            |             |            |   |            |            |            |   |            |            |            |   |            |            |             |   |            |            |             |   |            |             |             |   |            |            |             |   |            |             |            |   |            |             |            |   |            |             |             |   |            |             |             |   |            |             |            |   |            |             |            |   |            |             |             |   |             |            |            |   |             |            |            |   |             |            |             |   |             |            |             |   |            |            |            |   |             |             |            |   |             |            |            |   |             |             |             |   |             |             |            |   |             |            |            |   |             |             |             |   |             |             |             |   |             |             |             |   |             |            |            |   |             |             |             |   |             |             |             |
| H                 | 0.30174500                                                                                                                                                                                                                                                                                                                                                                                                                                                                                                                                                                                                                                                                                                                                                                                                                                                                                                                                                                                                                                                                                                                                                                                                                                                                                                                                                                                                                                                                                                                                                                                                                                                                                                                                                                                                                                                                                                                                                                                                                                                                                                                                                                                                                                                                                                                                                                                                                   | -1.84588300                                                                         | -0.00001500                                                                           |             |             |   |             |             |             |   |             |             |             |   |             |             |             |   |             |             |             |   |             |            |             |   |             |             |             |   |             |             |             |   |             |             |             |   |             |             |             |   |             |             |             |   |             |             |            |   |             |             |             |   |             |             |             |   |             |             |             |   |             |             |             |   |             |             |             |   |             |             |             |                                                                                                                                                                                                                                                                                                                                                                                                                                                                                                                                                                                                                                                                                                                                                                                                                                                                                                                                                                                                                                                                                                                                                                                                                                                                                                                                                                                                                                                                                                                                                                                                                                                                                                                                                                           |            |             |             |            |            |             |             |            |            |            |            |             |            |             |             |             |            |             |             |             |            |             |             |            |            |             |             |            |            |             |            |            |            |             |             |            |            |            |            |            |            |            |            |                                                                                                                                                                                                                                                                                                                                                                                                                                                                                                                                                                                                                                                                                                                                                                                                                                                                                                                                                                                                                                                                                                                                                                                                                                                                                                                                                                                                                                                                                                                                                                                                                                                                                                                                                                                                                                                                                                                                                                                                                                                                                                                                                                                                                                                                                                                                                                                                                                                                                                                                                                                                                                                                            |   |            |             |             |   |            |             |             |   |            |             |            |   |            |             |            |   |            |             |            |   |            |             |             |   |             |             |             |   |             |             |             |   |             |             |             |   |             |             |             |                                                                                                                                                                                                                                                                                                                                                                                                                                                                                                                                                                                                                                                                                                                                                                                                                                                                                                                                                                                                                                                                                                                                                                                                                                                                                                                                                                                                                                                                                                                                                                                                                                                                                                                                                                            |            |             |             |            |            |             |             |            |            |             |             |             |            |            |            |             |            |             |             |             |            |             |             |            |             |             |             |            |             |             |             |            |             |            |            |            |             |            |            |            |            |            |             |             |             |             |             |             |             |             |             |             |             |             |             |            |             |             |             |            |             |             |             |            |             |             |             |            |             |             |             |             |             |             |             |             |             |             |            |             |             |             |             |             |             |             |             |                                                                                                                                                                                                                                                                                                                                                                                                                                                                                                                                                                                                                                                                                                                                                                                                                                                                                                                                                                                                                                                                                                                                                                                                                                                                                                                                                                                                                                                                                                                                                                                                                                                                                                                                                                                                                                                                                                                                                                                                                                                                                                                                                                                                                                                                                                                                                                                                                                                                                                                                                                                                                                                                         |   |            |             |            |   |            |            |            |   |            |             |            |   |            |            |            |   |            |            |            |   |            |            |             |   |            |            |             |   |            |             |             |   |            |            |             |   |            |             |            |   |            |             |            |   |            |             |             |   |            |             |             |   |            |             |            |   |            |             |            |   |            |             |             |   |             |            |            |   |             |            |            |   |             |            |             |   |             |            |             |   |            |            |            |   |             |             |            |   |             |            |            |   |             |             |             |   |             |             |            |   |             |            |            |   |             |             |             |   |             |             |             |   |             |             |             |   |             |            |            |   |             |             |             |   |             |             |             |
| C                 | 1.86666800                                                                                                                                                                                                                                                                                                                                                                                                                                                                                                                                                                                                                                                                                                                                                                                                                                                                                                                                                                                                                                                                                                                                                                                                                                                                                                                                                                                                                                                                                                                                                                                                                                                                                                                                                                                                                                                                                                                                                                                                                                                                                                                                                                                                                                                                                                                                                                                                                   | -0.36861900                                                                         | -0.00000200                                                                           |             |             |   |             |             |             |   |             |             |             |   |             |             |             |   |             |             |             |   |             |            |             |   |             |             |             |   |             |             |             |   |             |             |             |   |             |             |             |   |             |             |             |   |             |             |            |   |             |             |             |   |             |             |             |   |             |             |             |   |             |             |             |   |             |             |             |   |             |             |             |                                                                                                                                                                                                                                                                                                                                                                                                                                                                                                                                                                                                                                                                                                                                                                                                                                                                                                                                                                                                                                                                                                                                                                                                                                                                                                                                                                                                                                                                                                                                                                                                                                                                                                                                                                           |            |             |             |            |            |             |             |            |            |            |            |             |            |             |             |             |            |             |             |             |            |             |             |            |            |             |             |            |            |             |            |            |            |             |             |            |            |            |            |            |            |            |            |                                                                                                                                                                                                                                                                                                                                                                                                                                                                                                                                                                                                                                                                                                                                                                                                                                                                                                                                                                                                                                                                                                                                                                                                                                                                                                                                                                                                                                                                                                                                                                                                                                                                                                                                                                                                                                                                                                                                                                                                                                                                                                                                                                                                                                                                                                                                                                                                                                                                                                                                                                                                                                                                            |   |            |             |             |   |            |             |             |   |            |             |            |   |            |             |            |   |            |             |            |   |            |             |             |   |             |             |             |   |             |             |             |   |             |             |             |   |             |             |             |                                                                                                                                                                                                                                                                                                                                                                                                                                                                                                                                                                                                                                                                                                                                                                                                                                                                                                                                                                                                                                                                                                                                                                                                                                                                                                                                                                                                                                                                                                                                                                                                                                                                                                                                                                            |            |             |             |            |            |             |             |            |            |             |             |             |            |            |            |             |            |             |             |             |            |             |             |            |             |             |             |            |             |             |             |            |             |            |            |            |             |            |            |            |            |            |             |             |             |             |             |             |             |             |             |             |             |             |             |            |             |             |             |            |             |             |             |            |             |             |             |            |             |             |             |             |             |             |             |             |             |             |            |             |             |             |             |             |             |             |             |                                                                                                                                                                                                                                                                                                                                                                                                                                                                                                                                                                                                                                                                                                                                                                                                                                                                                                                                                                                                                                                                                                                                                                                                                                                                                                                                                                                                                                                                                                                                                                                                                                                                                                                                                                                                                                                                                                                                                                                                                                                                                                                                                                                                                                                                                                                                                                                                                                                                                                                                                                                                                                                                         |   |            |             |            |   |            |            |            |   |            |             |            |   |            |            |            |   |            |            |            |   |            |            |             |   |            |            |             |   |            |             |             |   |            |            |             |   |            |             |            |   |            |             |            |   |            |             |             |   |            |             |             |   |            |             |            |   |            |             |            |   |            |             |             |   |             |            |            |   |             |            |            |   |             |            |             |   |             |            |             |   |            |            |            |   |             |             |            |   |             |            |            |   |             |             |             |   |             |             |            |   |             |            |            |   |             |             |             |   |             |             |             |   |             |             |             |   |             |            |            |   |             |             |             |   |             |             |             |
| C                 | 2.88788600                                                                                                                                                                                                                                                                                                                                                                                                                                                                                                                                                                                                                                                                                                                                                                                                                                                                                                                                                                                                                                                                                                                                                                                                                                                                                                                                                                                                                                                                                                                                                                                                                                                                                                                                                                                                                                                                                                                                                                                                                                                                                                                                                                                                                                                                                                                                                                                                                   | -1.35042500                                                                         | -0.00002100                                                                           |             |             |   |             |             |             |   |             |             |             |   |             |             |             |   |             |             |             |   |             |            |             |   |             |             |             |   |             |             |             |   |             |             |             |   |             |             |             |   |             |             |             |   |             |             |            |   |             |             |             |   |             |             |             |   |             |             |             |   |             |             |             |   |             |             |             |   |             |             |             |                                                                                                                                                                                                                                                                                                                                                                                                                                                                                                                                                                                                                                                                                                                                                                                                                                                                                                                                                                                                                                                                                                                                                                                                                                                                                                                                                                                                                                                                                                                                                                                                                                                                                                                                                                           |            |             |             |            |            |             |             |            |            |            |            |             |            |             |             |             |            |             |             |             |            |             |             |            |            |             |             |            |            |             |            |            |            |             |             |            |            |            |            |            |            |            |            |                                                                                                                                                                                                                                                                                                                                                                                                                                                                                                                                                                                                                                                                                                                                                                                                                                                                                                                                                                                                                                                                                                                                                                                                                                                                                                                                                                                                                                                                                                                                                                                                                                                                                                                                                                                                                                                                                                                                                                                                                                                                                                                                                                                                                                                                                                                                                                                                                                                                                                                                                                                                                                                                            |   |            |             |             |   |            |             |             |   |            |             |            |   |            |             |            |   |            |             |            |   |            |             |             |   |             |             |             |   |             |             |             |   |             |             |             |   |             |             |             |                                                                                                                                                                                                                                                                                                                                                                                                                                                                                                                                                                                                                                                                                                                                                                                                                                                                                                                                                                                                                                                                                                                                                                                                                                                                                                                                                                                                                                                                                                                                                                                                                                                                                                                                                                            |            |             |             |            |            |             |             |            |            |             |             |             |            |            |            |             |            |             |             |             |            |             |             |            |             |             |             |            |             |             |             |            |             |            |            |            |             |            |            |            |            |            |             |             |             |             |             |             |             |             |             |             |             |             |             |            |             |             |             |            |             |             |             |            |             |             |             |            |             |             |             |             |             |             |             |             |             |             |            |             |             |             |             |             |             |             |             |                                                                                                                                                                                                                                                                                                                                                                                                                                                                                                                                                                                                                                                                                                                                                                                                                                                                                                                                                                                                                                                                                                                                                                                                                                                                                                                                                                                                                                                                                                                                                                                                                                                                                                                                                                                                                                                                                                                                                                                                                                                                                                                                                                                                                                                                                                                                                                                                                                                                                                                                                                                                                                                                         |   |            |             |            |   |            |            |            |   |            |             |            |   |            |            |            |   |            |            |            |   |            |            |             |   |            |            |             |   |            |             |             |   |            |            |             |   |            |             |            |   |            |             |            |   |            |             |             |   |            |             |             |   |            |             |            |   |            |             |            |   |            |             |             |   |             |            |            |   |             |            |            |   |             |            |             |   |             |            |             |   |            |            |            |   |             |             |            |   |             |            |            |   |             |             |             |   |             |             |            |   |             |            |            |   |             |             |             |   |             |             |             |   |             |             |             |   |             |            |            |   |             |             |             |   |             |             |             |
| C                 | 2.31046700                                                                                                                                                                                                                                                                                                                                                                                                                                                                                                                                                                                                                                                                                                                                                                                                                                                                                                                                                                                                                                                                                                                                                                                                                                                                                                                                                                                                                                                                                                                                                                                                                                                                                                                                                                                                                                                                                                                                                                                                                                                                                                                                                                                                                                                                                                                                                                                                                   | 0.97522400                                                                          | 0.00005300                                                                            |             |             |   |             |             |             |   |             |             |             |   |             |             |             |   |             |             |             |   |             |            |             |   |             |             |             |   |             |             |             |   |             |             |             |   |             |             |             |   |             |             |             |   |             |             |            |   |             |             |             |   |             |             |             |   |             |             |             |   |             |             |             |   |             |             |             |   |             |             |             |                                                                                                                                                                                                                                                                                                                                                                                                                                                                                                                                                                                                                                                                                                                                                                                                                                                                                                                                                                                                                                                                                                                                                                                                                                                                                                                                                                                                                                                                                                                                                                                                                                                                                                                                                                           |            |             |             |            |            |             |             |            |            |            |            |             |            |             |             |             |            |             |             |             |            |             |             |            |            |             |             |            |            |             |            |            |            |             |             |            |            |            |            |            |            |            |            |                                                                                                                                                                                                                                                                                                                                                                                                                                                                                                                                                                                                                                                                                                                                                                                                                                                                                                                                                                                                                                                                                                                                                                                                                                                                                                                                                                                                                                                                                                                                                                                                                                                                                                                                                                                                                                                                                                                                                                                                                                                                                                                                                                                                                                                                                                                                                                                                                                                                                                                                                                                                                                                                            |   |            |             |             |   |            |             |             |   |            |             |            |   |            |             |            |   |            |             |            |   |            |             |             |   |             |             |             |   |             |             |             |   |             |             |             |   |             |             |             |                                                                                                                                                                                                                                                                                                                                                                                                                                                                                                                                                                                                                                                                                                                                                                                                                                                                                                                                                                                                                                                                                                                                                                                                                                                                                                                                                                                                                                                                                                                                                                                                                                                                                                                                                                            |            |             |             |            |            |             |             |            |            |             |             |             |            |            |            |             |            |             |             |             |            |             |             |            |             |             |             |            |             |             |             |            |             |            |            |            |             |            |            |            |            |            |             |             |             |             |             |             |             |             |             |             |             |             |             |            |             |             |             |            |             |             |             |            |             |             |             |            |             |             |             |             |             |             |             |             |             |             |            |             |             |             |             |             |             |             |             |                                                                                                                                                                                                                                                                                                                                                                                                                                                                                                                                                                                                                                                                                                                                                                                                                                                                                                                                                                                                                                                                                                                                                                                                                                                                                                                                                                                                                                                                                                                                                                                                                                                                                                                                                                                                                                                                                                                                                                                                                                                                                                                                                                                                                                                                                                                                                                                                                                                                                                                                                                                                                                                                         |   |            |             |            |   |            |            |            |   |            |             |            |   |            |            |            |   |            |            |            |   |            |            |             |   |            |            |             |   |            |             |             |   |            |            |             |   |            |             |            |   |            |             |            |   |            |             |             |   |            |             |             |   |            |             |            |   |            |             |            |   |            |             |             |   |             |            |            |   |             |            |            |   |             |            |             |   |             |            |             |   |            |            |            |   |             |             |            |   |             |            |            |   |             |             |             |   |             |             |            |   |             |            |            |   |             |             |             |   |             |             |             |   |             |             |             |   |             |            |            |   |             |             |             |   |             |             |             |
| C                 | 4.22981100                                                                                                                                                                                                                                                                                                                                                                                                                                                                                                                                                                                                                                                                                                                                                                                                                                                                                                                                                                                                                                                                                                                                                                                                                                                                                                                                                                                                                                                                                                                                                                                                                                                                                                                                                                                                                                                                                                                                                                                                                                                                                                                                                                                                                                                                                                                                                                                                                   | -1.02184100                                                                         | -0.00001200                                                                           |             |             |   |             |             |             |   |             |             |             |   |             |             |             |   |             |             |             |   |             |            |             |   |             |             |             |   |             |             |             |   |             |             |             |   |             |             |             |   |             |             |             |   |             |             |            |   |             |             |             |   |             |             |             |   |             |             |             |   |             |             |             |   |             |             |             |   |             |             |             |                                                                                                                                                                                                                                                                                                                                                                                                                                                                                                                                                                                                                                                                                                                                                                                                                                                                                                                                                                                                                                                                                                                                                                                                                                                                                                                                                                                                                                                                                                                                                                                                                                                                                                                                                                           |            |             |             |            |            |             |             |            |            |            |            |             |            |             |             |             |            |             |             |             |            |             |             |            |            |             |             |            |            |             |            |            |            |             |             |            |            |            |            |            |            |            |            |                                                                                                                                                                                                                                                                                                                                                                                                                                                                                                                                                                                                                                                                                                                                                                                                                                                                                                                                                                                                                                                                                                                                                                                                                                                                                                                                                                                                                                                                                                                                                                                                                                                                                                                                                                                                                                                                                                                                                                                                                                                                                                                                                                                                                                                                                                                                                                                                                                                                                                                                                                                                                                                                            |   |            |             |             |   |            |             |             |   |            |             |            |   |            |             |            |   |            |             |            |   |            |             |             |   |             |             |             |   |             |             |             |   |             |             |             |   |             |             |             |                                                                                                                                                                                                                                                                                                                                                                                                                                                                                                                                                                                                                                                                                                                                                                                                                                                                                                                                                                                                                                                                                                                                                                                                                                                                                                                                                                                                                                                                                                                                                                                                                                                                                                                                                                            |            |             |             |            |            |             |             |            |            |             |             |             |            |            |            |             |            |             |             |             |            |             |             |            |             |             |             |            |             |             |             |            |             |            |            |            |             |            |            |            |            |            |             |             |             |             |             |             |             |             |             |             |             |             |             |            |             |             |             |            |             |             |             |            |             |             |             |            |             |             |             |             |             |             |             |             |             |             |            |             |             |             |             |             |             |             |             |                                                                                                                                                                                                                                                                                                                                                                                                                                                                                                                                                                                                                                                                                                                                                                                                                                                                                                                                                                                                                                                                                                                                                                                                                                                                                                                                                                                                                                                                                                                                                                                                                                                                                                                                                                                                                                                                                                                                                                                                                                                                                                                                                                                                                                                                                                                                                                                                                                                                                                                                                                                                                                                                         |   |            |             |            |   |            |            |            |   |            |             |            |   |            |            |            |   |            |            |            |   |            |            |             |   |            |            |             |   |            |             |             |   |            |            |             |   |            |             |            |   |            |             |            |   |            |             |             |   |            |             |             |   |            |             |            |   |            |             |            |   |            |             |             |   |             |            |            |   |             |            |            |   |             |            |             |   |             |            |             |   |            |            |            |   |             |             |            |   |             |            |            |   |             |             |             |   |             |             |            |   |             |            |            |   |             |             |             |   |             |             |             |   |             |             |             |   |             |            |            |   |             |             |             |   |             |             |             |
| H                 | 2.59951900                                                                                                                                                                                                                                                                                                                                                                                                                                                                                                                                                                                                                                                                                                                                                                                                                                                                                                                                                                                                                                                                                                                                                                                                                                                                                                                                                                                                                                                                                                                                                                                                                                                                                                                                                                                                                                                                                                                                                                                                                                                                                                                                                                                                                                                                                                                                                                                                                   | -2.39700800                                                                         | -0.00004500                                                                           |             |             |   |             |             |             |   |             |             |             |   |             |             |             |   |             |             |             |   |             |            |             |   |             |             |             |   |             |             |             |   |             |             |             |   |             |             |             |   |             |             |             |   |             |             |            |   |             |             |             |   |             |             |             |   |             |             |             |   |             |             |             |   |             |             |             |   |             |             |             |                                                                                                                                                                                                                                                                                                                                                                                                                                                                                                                                                                                                                                                                                                                                                                                                                                                                                                                                                                                                                                                                                                                                                                                                                                                                                                                                                                                                                                                                                                                                                                                                                                                                                                                                                                           |            |             |             |            |            |             |             |            |            |            |            |             |            |             |             |             |            |             |             |             |            |             |             |            |            |             |             |            |            |             |            |            |            |             |             |            |            |            |            |            |            |            |            |                                                                                                                                                                                                                                                                                                                                                                                                                                                                                                                                                                                                                                                                                                                                                                                                                                                                                                                                                                                                                                                                                                                                                                                                                                                                                                                                                                                                                                                                                                                                                                                                                                                                                                                                                                                                                                                                                                                                                                                                                                                                                                                                                                                                                                                                                                                                                                                                                                                                                                                                                                                                                                                                            |   |            |             |             |   |            |             |             |   |            |             |            |   |            |             |            |   |            |             |            |   |            |             |             |   |             |             |             |   |             |             |             |   |             |             |             |   |             |             |             |                                                                                                                                                                                                                                                                                                                                                                                                                                                                                                                                                                                                                                                                                                                                                                                                                                                                                                                                                                                                                                                                                                                                                                                                                                                                                                                                                                                                                                                                                                                                                                                                                                                                                                                                                                            |            |             |             |            |            |             |             |            |            |             |             |             |            |            |            |             |            |             |             |             |            |             |             |            |             |             |             |            |             |             |             |            |             |            |            |            |             |            |            |            |            |            |             |             |             |             |             |             |             |             |             |             |             |             |             |            |             |             |             |            |             |             |             |            |             |             |             |            |             |             |             |             |             |             |             |             |             |             |            |             |             |             |             |             |             |             |             |                                                                                                                                                                                                                                                                                                                                                                                                                                                                                                                                                                                                                                                                                                                                                                                                                                                                                                                                                                                                                                                                                                                                                                                                                                                                                                                                                                                                                                                                                                                                                                                                                                                                                                                                                                                                                                                                                                                                                                                                                                                                                                                                                                                                                                                                                                                                                                                                                                                                                                                                                                                                                                                                         |   |            |             |            |   |            |            |            |   |            |             |            |   |            |            |            |   |            |            |            |   |            |            |             |   |            |            |             |   |            |             |             |   |            |            |             |   |            |             |            |   |            |             |            |   |            |             |             |   |            |             |             |   |            |             |            |   |            |             |            |   |            |             |             |   |             |            |            |   |             |            |            |   |             |            |             |   |             |            |             |   |            |            |            |   |             |             |            |   |             |            |            |   |             |             |             |   |             |             |            |   |             |            |            |   |             |             |             |   |             |             |             |   |             |             |             |   |             |            |            |   |             |             |             |   |             |             |             |
| C                 | 3.65934100                                                                                                                                                                                                                                                                                                                                                                                                                                                                                                                                                                                                                                                                                                                                                                                                                                                                                                                                                                                                                                                                                                                                                                                                                                                                                                                                                                                                                                                                                                                                                                                                                                                                                                                                                                                                                                                                                                                                                                                                                                                                                                                                                                                                                                                                                                                                                                                                                   | 1.29423200                                                                          | 0.00006500                                                                            |             |             |   |             |             |             |   |             |             |             |   |             |             |             |   |             |             |             |   |             |            |             |   |             |             |             |   |             |             |             |   |             |             |             |   |             |             |             |   |             |             |             |   |             |             |            |   |             |             |             |   |             |             |             |   |             |             |             |   |             |             |             |   |             |             |             |   |             |             |             |                                                                                                                                                                                                                                                                                                                                                                                                                                                                                                                                                                                                                                                                                                                                                                                                                                                                                                                                                                                                                                                                                                                                                                                                                                                                                                                                                                                                                                                                                                                                                                                                                                                                                                                                                                           |            |             |             |            |            |             |             |            |            |            |            |             |            |             |             |             |            |             |             |             |            |             |             |            |            |             |             |            |            |             |            |            |            |             |             |            |            |            |            |            |            |            |            |                                                                                                                                                                                                                                                                                                                                                                                                                                                                                                                                                                                                                                                                                                                                                                                                                                                                                                                                                                                                                                                                                                                                                                                                                                                                                                                                                                                                                                                                                                                                                                                                                                                                                                                                                                                                                                                                                                                                                                                                                                                                                                                                                                                                                                                                                                                                                                                                                                                                                                                                                                                                                                                                            |   |            |             |             |   |            |             |             |   |            |             |            |   |            |             |            |   |            |             |            |   |            |             |             |   |             |             |             |   |             |             |             |   |             |             |             |   |             |             |             |                                                                                                                                                                                                                                                                                                                                                                                                                                                                                                                                                                                                                                                                                                                                                                                                                                                                                                                                                                                                                                                                                                                                                                                                                                                                                                                                                                                                                                                                                                                                                                                                                                                                                                                                                                            |            |             |             |            |            |             |             |            |            |             |             |             |            |            |            |             |            |             |             |             |            |             |             |            |             |             |             |            |             |             |             |            |             |            |            |            |             |            |            |            |            |            |             |             |             |             |             |             |             |             |             |             |             |             |             |            |             |             |             |            |             |             |             |            |             |             |             |            |             |             |             |             |             |             |             |             |             |             |            |             |             |             |             |             |             |             |             |                                                                                                                                                                                                                                                                                                                                                                                                                                                                                                                                                                                                                                                                                                                                                                                                                                                                                                                                                                                                                                                                                                                                                                                                                                                                                                                                                                                                                                                                                                                                                                                                                                                                                                                                                                                                                                                                                                                                                                                                                                                                                                                                                                                                                                                                                                                                                                                                                                                                                                                                                                                                                                                                         |   |            |             |            |   |            |            |            |   |            |             |            |   |            |            |            |   |            |            |            |   |            |            |             |   |            |            |             |   |            |             |             |   |            |            |             |   |            |             |            |   |            |             |            |   |            |             |             |   |            |             |             |   |            |             |            |   |            |             |            |   |            |             |             |   |             |            |            |   |             |            |            |   |             |            |             |   |             |            |             |   |            |            |            |   |             |             |            |   |             |            |            |   |             |             |             |   |             |             |            |   |             |            |            |   |             |             |             |   |             |             |             |   |             |             |             |   |             |            |            |   |             |             |             |   |             |             |             |
| H                 | 1.56804000                                                                                                                                                                                                                                                                                                                                                                                                                                                                                                                                                                                                                                                                                                                                                                                                                                                                                                                                                                                                                                                                                                                                                                                                                                                                                                                                                                                                                                                                                                                                                                                                                                                                                                                                                                                                                                                                                                                                                                                                                                                                                                                                                                                                                                                                                                                                                                                                                   | 1.76036200                                                                          | 0.00007900                                                                            |             |             |   |             |             |             |   |             |             |             |   |             |             |             |   |             |             |             |   |             |            |             |   |             |             |             |   |             |             |             |   |             |             |             |   |             |             |             |   |             |             |             |   |             |             |            |   |             |             |             |   |             |             |             |   |             |             |             |   |             |             |             |   |             |             |             |   |             |             |             |                                                                                                                                                                                                                                                                                                                                                                                                                                                                                                                                                                                                                                                                                                                                                                                                                                                                                                                                                                                                                                                                                                                                                                                                                                                                                                                                                                                                                                                                                                                                                                                                                                                                                                                                                                           |            |             |             |            |            |             |             |            |            |            |            |             |            |             |             |             |            |             |             |             |            |             |             |            |            |             |             |            |            |             |            |            |            |             |             |            |            |            |            |            |            |            |            |                                                                                                                                                                                                                                                                                                                                                                                                                                                                                                                                                                                                                                                                                                                                                                                                                                                                                                                                                                                                                                                                                                                                                                                                                                                                                                                                                                                                                                                                                                                                                                                                                                                                                                                                                                                                                                                                                                                                                                                                                                                                                                                                                                                                                                                                                                                                                                                                                                                                                                                                                                                                                                                                            |   |            |             |             |   |            |             |             |   |            |             |            |   |            |             |            |   |            |             |            |   |            |             |             |   |             |             |             |   |             |             |             |   |             |             |             |   |             |             |             |                                                                                                                                                                                                                                                                                                                                                                                                                                                                                                                                                                                                                                                                                                                                                                                                                                                                                                                                                                                                                                                                                                                                                                                                                                                                                                                                                                                                                                                                                                                                                                                                                                                                                                                                                                            |            |             |             |            |            |             |             |            |            |             |             |             |            |            |            |             |            |             |             |             |            |             |             |            |             |             |             |            |             |             |             |            |             |            |            |            |             |            |            |            |            |            |             |             |             |             |             |             |             |             |             |             |             |             |             |            |             |             |             |            |             |             |             |            |             |             |             |            |             |             |             |             |             |             |             |             |             |             |            |             |             |             |             |             |             |             |             |                                                                                                                                                                                                                                                                                                                                                                                                                                                                                                                                                                                                                                                                                                                                                                                                                                                                                                                                                                                                                                                                                                                                                                                                                                                                                                                                                                                                                                                                                                                                                                                                                                                                                                                                                                                                                                                                                                                                                                                                                                                                                                                                                                                                                                                                                                                                                                                                                                                                                                                                                                                                                                                                         |   |            |             |            |   |            |            |            |   |            |             |            |   |            |            |            |   |            |            |            |   |            |            |             |   |            |            |             |   |            |             |             |   |            |            |             |   |            |             |            |   |            |             |            |   |            |             |             |   |            |             |             |   |            |             |            |   |            |             |            |   |            |             |             |   |             |            |            |   |             |            |            |   |             |            |             |   |             |            |             |   |            |            |            |   |             |             |            |   |             |            |            |   |             |             |             |   |             |             |            |   |             |            |            |   |             |             |             |   |             |             |             |   |             |             |             |   |             |            |            |   |             |             |             |   |             |             |             |
| C                 | 4.63972500                                                                                                                                                                                                                                                                                                                                                                                                                                                                                                                                                                                                                                                                                                                                                                                                                                                                                                                                                                                                                                                                                                                                                                                                                                                                                                                                                                                                                                                                                                                                                                                                                                                                                                                                                                                                                                                                                                                                                                                                                                                                                                                                                                                                                                                                                                                                                                                                                   | 0.30924900                                                                          | 0.00002300                                                                            |             |             |   |             |             |             |   |             |             |             |   |             |             |             |   |             |             |             |   |             |            |             |   |             |             |             |   |             |             |             |   |             |             |             |   |             |             |             |   |             |             |             |   |             |             |            |   |             |             |             |   |             |             |             |   |             |             |             |   |             |             |             |   |             |             |             |   |             |             |             |                                                                                                                                                                                                                                                                                                                                                                                                                                                                                                                                                                                                                                                                                                                                                                                                                                                                                                                                                                                                                                                                                                                                                                                                                                                                                                                                                                                                                                                                                                                                                                                                                                                                                                                                                                           |            |             |             |            |            |             |             |            |            |            |            |             |            |             |             |             |            |             |             |             |            |             |             |            |            |             |             |            |            |             |            |            |            |             |             |            |            |            |            |            |            |            |            |                                                                                                                                                                                                                                                                                                                                                                                                                                                                                                                                                                                                                                                                                                                                                                                                                                                                                                                                                                                                                                                                                                                                                                                                                                                                                                                                                                                                                                                                                                                                                                                                                                                                                                                                                                                                                                                                                                                                                                                                                                                                                                                                                                                                                                                                                                                                                                                                                                                                                                                                                                                                                                                                            |   |            |             |             |   |            |             |             |   |            |             |            |   |            |             |            |   |            |             |            |   |            |             |             |   |             |             |             |   |             |             |             |   |             |             |             |   |             |             |             |                                                                                                                                                                                                                                                                                                                                                                                                                                                                                                                                                                                                                                                                                                                                                                                                                                                                                                                                                                                                                                                                                                                                                                                                                                                                                                                                                                                                                                                                                                                                                                                                                                                                                                                                                                            |            |             |             |            |            |             |             |            |            |             |             |             |            |            |            |             |            |             |             |             |            |             |             |            |             |             |             |            |             |             |             |            |             |            |            |            |             |            |            |            |            |            |             |             |             |             |             |             |             |             |             |             |             |             |             |            |             |             |             |            |             |             |             |            |             |             |             |            |             |             |             |             |             |             |             |             |             |             |            |             |             |             |             |             |             |             |             |                                                                                                                                                                                                                                                                                                                                                                                                                                                                                                                                                                                                                                                                                                                                                                                                                                                                                                                                                                                                                                                                                                                                                                                                                                                                                                                                                                                                                                                                                                                                                                                                                                                                                                                                                                                                                                                                                                                                                                                                                                                                                                                                                                                                                                                                                                                                                                                                                                                                                                                                                                                                                                                                         |   |            |             |            |   |            |            |            |   |            |             |            |   |            |            |            |   |            |            |            |   |            |            |             |   |            |            |             |   |            |             |             |   |            |            |             |   |            |             |            |   |            |             |            |   |            |             |             |   |            |             |             |   |            |             |            |   |            |             |            |   |            |             |             |   |             |            |            |   |             |            |            |   |             |            |             |   |             |            |             |   |            |            |            |   |             |             |            |   |             |            |            |   |             |             |             |   |             |             |            |   |             |            |            |   |             |             |             |   |             |             |             |   |             |             |             |   |             |            |            |   |             |             |             |   |             |             |             |
| H                 | 4.96979800                                                                                                                                                                                                                                                                                                                                                                                                                                                                                                                                                                                                                                                                                                                                                                                                                                                                                                                                                                                                                                                                                                                                                                                                                                                                                                                                                                                                                                                                                                                                                                                                                                                                                                                                                                                                                                                                                                                                                                                                                                                                                                                                                                                                                                                                                                                                                                                                                   | -1.81510600                                                                         | -0.00003000                                                                           |             |             |   |             |             |             |   |             |             |             |   |             |             |             |   |             |             |             |   |             |            |             |   |             |             |             |   |             |             |             |   |             |             |             |   |             |             |             |   |             |             |             |   |             |             |            |   |             |             |             |   |             |             |             |   |             |             |             |   |             |             |             |   |             |             |             |   |             |             |             |                                                                                                                                                                                                                                                                                                                                                                                                                                                                                                                                                                                                                                                                                                                                                                                                                                                                                                                                                                                                                                                                                                                                                                                                                                                                                                                                                                                                                                                                                                                                                                                                                                                                                                                                                                           |            |             |             |            |            |             |             |            |            |            |            |             |            |             |             |             |            |             |             |             |            |             |             |            |            |             |             |            |            |             |            |            |            |             |             |            |            |            |            |            |            |            |            |                                                                                                                                                                                                                                                                                                                                                                                                                                                                                                                                                                                                                                                                                                                                                                                                                                                                                                                                                                                                                                                                                                                                                                                                                                                                                                                                                                                                                                                                                                                                                                                                                                                                                                                                                                                                                                                                                                                                                                                                                                                                                                                                                                                                                                                                                                                                                                                                                                                                                                                                                                                                                                                                            |   |            |             |             |   |            |             |             |   |            |             |            |   |            |             |            |   |            |             |            |   |            |             |             |   |             |             |             |   |             |             |             |   |             |             |             |   |             |             |             |                                                                                                                                                                                                                                                                                                                                                                                                                                                                                                                                                                                                                                                                                                                                                                                                                                                                                                                                                                                                                                                                                                                                                                                                                                                                                                                                                                                                                                                                                                                                                                                                                                                                                                                                                                            |            |             |             |            |            |             |             |            |            |             |             |             |            |            |            |             |            |             |             |             |            |             |             |            |             |             |             |            |             |             |             |            |             |            |            |            |             |            |            |            |            |            |             |             |             |             |             |             |             |             |             |             |             |             |             |            |             |             |             |            |             |             |             |            |             |             |             |            |             |             |             |             |             |             |             |             |             |             |            |             |             |             |             |             |             |             |             |                                                                                                                                                                                                                                                                                                                                                                                                                                                                                                                                                                                                                                                                                                                                                                                                                                                                                                                                                                                                                                                                                                                                                                                                                                                                                                                                                                                                                                                                                                                                                                                                                                                                                                                                                                                                                                                                                                                                                                                                                                                                                                                                                                                                                                                                                                                                                                                                                                                                                                                                                                                                                                                                         |   |            |             |            |   |            |            |            |   |            |             |            |   |            |            |            |   |            |            |            |   |            |            |             |   |            |            |             |   |            |             |             |   |            |            |             |   |            |             |            |   |            |             |            |   |            |             |             |   |            |             |             |   |            |             |            |   |            |             |            |   |            |             |             |   |             |            |            |   |             |            |            |   |             |            |             |   |             |            |             |   |            |            |            |   |             |             |            |   |             |            |            |   |             |             |             |   |             |             |            |   |             |            |            |   |             |             |             |   |             |             |             |   |             |             |             |   |             |            |            |   |             |             |             |   |             |             |             |
| H                 | 3.95054400                                                                                                                                                                                                                                                                                                                                                                                                                                                                                                                                                                                                                                                                                                                                                                                                                                                                                                                                                                                                                                                                                                                                                                                                                                                                                                                                                                                                                                                                                                                                                                                                                                                                                                                                                                                                                                                                                                                                                                                                                                                                                                                                                                                                                                                                                                                                                                                                                   | 2.33962600                                                                          | 0.00010300                                                                            |             |             |   |             |             |             |   |             |             |             |   |             |             |             |   |             |             |             |   |             |            |             |   |             |             |             |   |             |             |             |   |             |             |             |   |             |             |             |   |             |             |             |   |             |             |            |   |             |             |             |   |             |             |             |   |             |             |             |   |             |             |             |   |             |             |             |   |             |             |             |                                                                                                                                                                                                                                                                                                                                                                                                                                                                                                                                                                                                                                                                                                                                                                                                                                                                                                                                                                                                                                                                                                                                                                                                                                                                                                                                                                                                                                                                                                                                                                                                                                                                                                                                                                           |            |             |             |            |            |             |             |            |            |            |            |             |            |             |             |             |            |             |             |             |            |             |             |            |            |             |             |            |            |             |            |            |            |             |             |            |            |            |            |            |            |            |            |                                                                                                                                                                                                                                                                                                                                                                                                                                                                                                                                                                                                                                                                                                                                                                                                                                                                                                                                                                                                                                                                                                                                                                                                                                                                                                                                                                                                                                                                                                                                                                                                                                                                                                                                                                                                                                                                                                                                                                                                                                                                                                                                                                                                                                                                                                                                                                                                                                                                                                                                                                                                                                                                            |   |            |             |             |   |            |             |             |   |            |             |            |   |            |             |            |   |            |             |            |   |            |             |             |   |             |             |             |   |             |             |             |   |             |             |             |   |             |             |             |                                                                                                                                                                                                                                                                                                                                                                                                                                                                                                                                                                                                                                                                                                                                                                                                                                                                                                                                                                                                                                                                                                                                                                                                                                                                                                                                                                                                                                                                                                                                                                                                                                                                                                                                                                            |            |             |             |            |            |             |             |            |            |             |             |             |            |            |            |             |            |             |             |             |            |             |             |            |             |             |             |            |             |             |             |            |             |            |            |            |             |            |            |            |            |            |             |             |             |             |             |             |             |             |             |             |             |             |             |            |             |             |             |            |             |             |             |            |             |             |             |            |             |             |             |             |             |             |             |             |             |             |            |             |             |             |             |             |             |             |             |                                                                                                                                                                                                                                                                                                                                                                                                                                                                                                                                                                                                                                                                                                                                                                                                                                                                                                                                                                                                                                                                                                                                                                                                                                                                                                                                                                                                                                                                                                                                                                                                                                                                                                                                                                                                                                                                                                                                                                                                                                                                                                                                                                                                                                                                                                                                                                                                                                                                                                                                                                                                                                                                         |   |            |             |            |   |            |            |            |   |            |             |            |   |            |            |            |   |            |            |            |   |            |            |             |   |            |            |             |   |            |             |             |   |            |            |             |   |            |             |            |   |            |             |            |   |            |             |             |   |            |             |             |   |            |             |            |   |            |             |            |   |            |             |             |   |             |            |            |   |             |            |            |   |             |            |             |   |             |            |             |   |            |            |            |   |             |             |            |   |             |            |            |   |             |             |             |   |             |             |            |   |             |            |            |   |             |             |             |   |             |             |             |   |             |             |             |   |             |            |            |   |             |             |             |   |             |             |             |
| H                 | 5.69106200                                                                                                                                                                                                                                                                                                                                                                                                                                                                                                                                                                                                                                                                                                                                                                                                                                                                                                                                                                                                                                                                                                                                                                                                                                                                                                                                                                                                                                                                                                                                                                                                                                                                                                                                                                                                                                                                                                                                                                                                                                                                                                                                                                                                                                                                                                                                                                                                                   | 0.56810000                                                                          | 0.00000600                                                                            |             |             |   |             |             |             |   |             |             |             |   |             |             |             |   |             |             |             |   |             |            |             |   |             |             |             |   |             |             |             |   |             |             |             |   |             |             |             |   |             |             |             |   |             |             |            |   |             |             |             |   |             |             |             |   |             |             |             |   |             |             |             |   |             |             |             |   |             |             |             |                                                                                                                                                                                                                                                                                                                                                                                                                                                                                                                                                                                                                                                                                                                                                                                                                                                                                                                                                                                                                                                                                                                                                                                                                                                                                                                                                                                                                                                                                                                                                                                                                                                                                                                                                                           |            |             |             |            |            |             |             |            |            |            |            |             |            |             |             |             |            |             |             |             |            |             |             |            |            |             |             |            |            |             |            |            |            |             |             |            |            |            |            |            |            |            |            |                                                                                                                                                                                                                                                                                                                                                                                                                                                                                                                                                                                                                                                                                                                                                                                                                                                                                                                                                                                                                                                                                                                                                                                                                                                                                                                                                                                                                                                                                                                                                                                                                                                                                                                                                                                                                                                                                                                                                                                                                                                                                                                                                                                                                                                                                                                                                                                                                                                                                                                                                                                                                                                                            |   |            |             |             |   |            |             |             |   |            |             |            |   |            |             |            |   |            |             |            |   |            |             |             |   |             |             |             |   |             |             |             |   |             |             |             |   |             |             |             |                                                                                                                                                                                                                                                                                                                                                                                                                                                                                                                                                                                                                                                                                                                                                                                                                                                                                                                                                                                                                                                                                                                                                                                                                                                                                                                                                                                                                                                                                                                                                                                                                                                                                                                                                                            |            |             |             |            |            |             |             |            |            |             |             |             |            |            |            |             |            |             |             |             |            |             |             |            |             |             |             |            |             |             |             |            |             |            |            |            |             |            |            |            |            |            |             |             |             |             |             |             |             |             |             |             |             |             |             |            |             |             |             |            |             |             |             |            |             |             |             |            |             |             |             |             |             |             |             |             |             |             |            |             |             |             |             |             |             |             |             |                                                                                                                                                                                                                                                                                                                                                                                                                                                                                                                                                                                                                                                                                                                                                                                                                                                                                                                                                                                                                                                                                                                                                                                                                                                                                                                                                                                                                                                                                                                                                                                                                                                                                                                                                                                                                                                                                                                                                                                                                                                                                                                                                                                                                                                                                                                                                                                                                                                                                                                                                                                                                                                                         |   |            |             |            |   |            |            |            |   |            |             |            |   |            |            |            |   |            |            |            |   |            |            |             |   |            |            |             |   |            |             |             |   |            |            |             |   |            |             |            |   |            |             |            |   |            |             |             |   |            |             |             |   |            |             |            |   |            |             |            |   |            |             |             |   |             |            |            |   |             |            |            |   |             |            |             |   |             |            |             |   |            |            |            |   |             |             |            |   |             |            |            |   |             |             |             |   |             |             |            |   |             |            |            |   |             |             |             |   |             |             |             |   |             |             |             |   |             |            |            |   |             |             |             |   |             |             |             |
| C                 | 3.11974600                                                                                                                                                                                                                                                                                                                                                                                                                                                                                                                                                                                                                                                                                                                                                                                                                                                                                                                                                                                                                                                                                                                                                                                                                                                                                                                                                                                                                                                                                                                                                                                                                                                                                                                                                                                                                                                                                                                                                                                                                                                                                                                                                                                                                                                                                                                                                                                                                   | -0.53082800                                                                         | 0.08153200                                                                            |             |             |   |             |             |             |   |             |             |             |   |             |             |             |   |             |             |             |   |             |            |             |   |             |             |             |   |             |             |             |   |             |             |             |   |             |             |             |   |             |             |             |   |             |             |            |   |             |             |             |   |             |             |             |   |             |             |             |   |             |             |             |   |             |             |             |   |             |             |             |                                                                                                                                                                                                                                                                                                                                                                                                                                                                                                                                                                                                                                                                                                                                                                                                                                                                                                                                                                                                                                                                                                                                                                                                                                                                                                                                                                                                                                                                                                                                                                                                                                                                                                                                                                           |            |             |             |            |            |             |             |            |            |            |            |             |            |             |             |             |            |             |             |             |            |             |             |            |            |             |             |            |            |             |            |            |            |             |             |            |            |            |            |            |            |            |            |                                                                                                                                                                                                                                                                                                                                                                                                                                                                                                                                                                                                                                                                                                                                                                                                                                                                                                                                                                                                                                                                                                                                                                                                                                                                                                                                                                                                                                                                                                                                                                                                                                                                                                                                                                                                                                                                                                                                                                                                                                                                                                                                                                                                                                                                                                                                                                                                                                                                                                                                                                                                                                                                            |   |            |             |             |   |            |             |             |   |            |             |            |   |            |             |            |   |            |             |            |   |            |             |             |   |             |             |             |   |             |             |             |   |             |             |             |   |             |             |             |                                                                                                                                                                                                                                                                                                                                                                                                                                                                                                                                                                                                                                                                                                                                                                                                                                                                                                                                                                                                                                                                                                                                                                                                                                                                                                                                                                                                                                                                                                                                                                                                                                                                                                                                                                            |            |             |             |            |            |             |             |            |            |             |             |             |            |            |            |             |            |             |             |             |            |             |             |            |             |             |             |            |             |             |             |            |             |            |            |            |             |            |            |            |            |            |             |             |             |             |             |             |             |             |             |             |             |             |             |            |             |             |             |            |             |             |             |            |             |             |             |            |             |             |             |             |             |             |             |             |             |             |            |             |             |             |             |             |             |             |             |                                                                                                                                                                                                                                                                                                                                                                                                                                                                                                                                                                                                                                                                                                                                                                                                                                                                                                                                                                                                                                                                                                                                                                                                                                                                                                                                                                                                                                                                                                                                                                                                                                                                                                                                                                                                                                                                                                                                                                                                                                                                                                                                                                                                                                                                                                                                                                                                                                                                                                                                                                                                                                                                         |   |            |             |            |   |            |            |            |   |            |             |            |   |            |            |            |   |            |            |            |   |            |            |             |   |            |            |             |   |            |             |             |   |            |            |             |   |            |             |            |   |            |             |            |   |            |             |             |   |            |             |             |   |            |             |            |   |            |             |            |   |            |             |             |   |             |            |            |   |             |            |            |   |             |            |             |   |             |            |             |   |            |            |            |   |             |             |            |   |             |            |            |   |             |             |             |   |             |             |            |   |             |            |            |   |             |             |             |   |             |             |             |   |             |             |             |   |             |            |            |   |             |             |             |   |             |             |             |
| C                 | 4.10205500                                                                                                                                                                                                                                                                                                                                                                                                                                                                                                                                                                                                                                                                                                                                                                                                                                                                                                                                                                                                                                                                                                                                                                                                                                                                                                                                                                                                                                                                                                                                                                                                                                                                                                                                                                                                                                                                                                                                                                                                                                                                                                                                                                                                                                                                                                                                                                                                                   | 0.08805700                                                                          | 1.06566800                                                                            |             |             |   |             |             |             |   |             |             |             |   |             |             |             |   |             |             |             |   |             |            |             |   |             |             |             |   |             |             |             |   |             |             |             |   |             |             |             |   |             |             |             |   |             |             |            |   |             |             |             |   |             |             |             |   |             |             |             |   |             |             |             |   |             |             |             |   |             |             |             |                                                                                                                                                                                                                                                                                                                                                                                                                                                                                                                                                                                                                                                                                                                                                                                                                                                                                                                                                                                                                                                                                                                                                                                                                                                                                                                                                                                                                                                                                                                                                                                                                                                                                                                                                                           |            |             |             |            |            |             |             |            |            |            |            |             |            |             |             |             |            |             |             |             |            |             |             |            |            |             |             |            |            |             |            |            |            |             |             |            |            |            |            |            |            |            |            |                                                                                                                                                                                                                                                                                                                                                                                                                                                                                                                                                                                                                                                                                                                                                                                                                                                                                                                                                                                                                                                                                                                                                                                                                                                                                                                                                                                                                                                                                                                                                                                                                                                                                                                                                                                                                                                                                                                                                                                                                                                                                                                                                                                                                                                                                                                                                                                                                                                                                                                                                                                                                                                                            |   |            |             |             |   |            |             |             |   |            |             |            |   |            |             |            |   |            |             |            |   |            |             |             |   |             |             |             |   |             |             |             |   |             |             |             |   |             |             |             |                                                                                                                                                                                                                                                                                                                                                                                                                                                                                                                                                                                                                                                                                                                                                                                                                                                                                                                                                                                                                                                                                                                                                                                                                                                                                                                                                                                                                                                                                                                                                                                                                                                                                                                                                                            |            |             |             |            |            |             |             |            |            |             |             |             |            |            |            |             |            |             |             |             |            |             |             |            |             |             |             |            |             |             |             |            |             |            |            |            |             |            |            |            |            |            |             |             |             |             |             |             |             |             |             |             |             |             |             |            |             |             |             |            |             |             |             |            |             |             |             |            |             |             |             |             |             |             |             |             |             |             |            |             |             |             |             |             |             |             |             |                                                                                                                                                                                                                                                                                                                                                                                                                                                                                                                                                                                                                                                                                                                                                                                                                                                                                                                                                                                                                                                                                                                                                                                                                                                                                                                                                                                                                                                                                                                                                                                                                                                                                                                                                                                                                                                                                                                                                                                                                                                                                                                                                                                                                                                                                                                                                                                                                                                                                                                                                                                                                                                                         |   |            |             |            |   |            |            |            |   |            |             |            |   |            |            |            |   |            |            |            |   |            |            |             |   |            |            |             |   |            |             |             |   |            |            |             |   |            |             |            |   |            |             |            |   |            |             |             |   |            |             |             |   |            |             |            |   |            |             |            |   |            |             |             |   |             |            |            |   |             |            |            |   |             |            |             |   |             |            |             |   |            |            |            |   |             |             |            |   |             |            |            |   |             |             |             |   |             |             |            |   |             |            |            |   |             |             |             |   |             |             |             |   |             |             |             |   |             |            |            |   |             |             |             |   |             |             |             |
| H                 | 3.85870100                                                                                                                                                                                                                                                                                                                                                                                                                                                                                                                                                                                                                                                                                                                                                                                                                                                                                                                                                                                                                                                                                                                                                                                                                                                                                                                                                                                                                                                                                                                                                                                                                                                                                                                                                                                                                                                                                                                                                                                                                                                                                                                                                                                                                                                                                                                                                                                                                   | -0.20684100                                                                         | 2.08727000                                                                            |             |             |   |             |             |             |   |             |             |             |   |             |             |             |   |             |             |             |   |             |            |             |   |             |             |             |   |             |             |             |   |             |             |             |   |             |             |             |   |             |             |             |   |             |             |            |   |             |             |             |   |             |             |             |   |             |             |             |   |             |             |             |   |             |             |             |   |             |             |             |                                                                                                                                                                                                                                                                                                                                                                                                                                                                                                                                                                                                                                                                                                                                                                                                                                                                                                                                                                                                                                                                                                                                                                                                                                                                                                                                                                                                                                                                                                                                                                                                                                                                                                                                                                           |            |             |             |            |            |             |             |            |            |            |            |             |            |             |             |             |            |             |             |             |            |             |             |            |            |             |             |            |            |             |            |            |            |             |             |            |            |            |            |            |            |            |            |                                                                                                                                                                                                                                                                                                                                                                                                                                                                                                                                                                                                                                                                                                                                                                                                                                                                                                                                                                                                                                                                                                                                                                                                                                                                                                                                                                                                                                                                                                                                                                                                                                                                                                                                                                                                                                                                                                                                                                                                                                                                                                                                                                                                                                                                                                                                                                                                                                                                                                                                                                                                                                                                            |   |            |             |             |   |            |             |             |   |            |             |            |   |            |             |            |   |            |             |            |   |            |             |             |   |             |             |             |   |             |             |             |   |             |             |             |   |             |             |             |                                                                                                                                                                                                                                                                                                                                                                                                                                                                                                                                                                                                                                                                                                                                                                                                                                                                                                                                                                                                                                                                                                                                                                                                                                                                                                                                                                                                                                                                                                                                                                                                                                                                                                                                                                            |            |             |             |            |            |             |             |            |            |             |             |             |            |            |            |             |            |             |             |             |            |             |             |            |             |             |             |            |             |             |             |            |             |            |            |            |             |            |            |            |            |            |             |             |             |             |             |             |             |             |             |             |             |             |             |            |             |             |             |            |             |             |             |            |             |             |             |            |             |             |             |             |             |             |             |             |             |             |            |             |             |             |             |             |             |             |             |                                                                                                                                                                                                                                                                                                                                                                                                                                                                                                                                                                                                                                                                                                                                                                                                                                                                                                                                                                                                                                                                                                                                                                                                                                                                                                                                                                                                                                                                                                                                                                                                                                                                                                                                                                                                                                                                                                                                                                                                                                                                                                                                                                                                                                                                                                                                                                                                                                                                                                                                                                                                                                                                         |   |            |             |            |   |            |            |            |   |            |             |            |   |            |            |            |   |            |            |            |   |            |            |             |   |            |            |             |   |            |             |             |   |            |            |             |   |            |             |            |   |            |             |            |   |            |             |             |   |            |             |             |   |            |             |            |   |            |             |            |   |            |             |             |   |             |            |            |   |             |            |            |   |             |            |             |   |             |            |             |   |            |            |            |   |             |             |            |   |             |            |            |   |             |             |             |   |             |             |            |   |             |            |            |   |             |             |             |   |             |             |             |   |             |             |             |   |             |            |            |   |             |             |             |   |             |             |             |
| H                 | 5.11410900                                                                                                                                                                                                                                                                                                                                                                                                                                                                                                                                                                                                                                                                                                                                                                                                                                                                                                                                                                                                                                                                                                                                                                                                                                                                                                                                                                                                                                                                                                                                                                                                                                                                                                                                                                                                                                                                                                                                                                                                                                                                                                                                                                                                                                                                                                                                                                                                                   | -0.24892300                                                                         | 0.83916000                                                                            |             |             |   |             |             |             |   |             |             |             |   |             |             |             |   |             |             |             |   |             |            |             |   |             |             |             |   |             |             |             |   |             |             |             |   |             |             |             |   |             |             |             |   |             |             |            |   |             |             |             |   |             |             |             |   |             |             |             |   |             |             |             |   |             |             |             |   |             |             |             |                                                                                                                                                                                                                                                                                                                                                                                                                                                                                                                                                                                                                                                                                                                                                                                                                                                                                                                                                                                                                                                                                                                                                                                                                                                                                                                                                                                                                                                                                                                                                                                                                                                                                                                                                                           |            |             |             |            |            |             |             |            |            |            |            |             |            |             |             |             |            |             |             |             |            |             |             |            |            |             |             |            |            |             |            |            |            |             |             |            |            |            |            |            |            |            |            |                                                                                                                                                                                                                                                                                                                                                                                                                                                                                                                                                                                                                                                                                                                                                                                                                                                                                                                                                                                                                                                                                                                                                                                                                                                                                                                                                                                                                                                                                                                                                                                                                                                                                                                                                                                                                                                                                                                                                                                                                                                                                                                                                                                                                                                                                                                                                                                                                                                                                                                                                                                                                                                                            |   |            |             |             |   |            |             |             |   |            |             |            |   |            |             |            |   |            |             |            |   |            |             |             |   |             |             |             |   |             |             |             |   |             |             |             |   |             |             |             |                                                                                                                                                                                                                                                                                                                                                                                                                                                                                                                                                                                                                                                                                                                                                                                                                                                                                                                                                                                                                                                                                                                                                                                                                                                                                                                                                                                                                                                                                                                                                                                                                                                                                                                                                                            |            |             |             |            |            |             |             |            |            |             |             |             |            |            |            |             |            |             |             |             |            |             |             |            |             |             |             |            |             |             |             |            |             |            |            |            |             |            |            |            |            |            |             |             |             |             |             |             |             |             |             |             |             |             |             |            |             |             |             |            |             |             |             |            |             |             |             |            |             |             |             |             |             |             |             |             |             |             |            |             |             |             |             |             |             |             |             |                                                                                                                                                                                                                                                                                                                                                                                                                                                                                                                                                                                                                                                                                                                                                                                                                                                                                                                                                                                                                                                                                                                                                                                                                                                                                                                                                                                                                                                                                                                                                                                                                                                                                                                                                                                                                                                                                                                                                                                                                                                                                                                                                                                                                                                                                                                                                                                                                                                                                                                                                                                                                                                                         |   |            |             |            |   |            |            |            |   |            |             |            |   |            |            |            |   |            |            |            |   |            |            |             |   |            |            |             |   |            |             |             |   |            |            |             |   |            |             |            |   |            |             |            |   |            |             |             |   |            |             |             |   |            |             |            |   |            |             |            |   |            |             |             |   |             |            |            |   |             |            |            |   |             |            |             |   |             |            |             |   |            |            |            |   |             |             |            |   |             |            |            |   |             |             |             |   |             |             |            |   |             |            |            |   |             |             |             |   |             |             |             |   |             |             |             |   |             |            |            |   |             |             |             |   |             |             |             |
| H                 | 4.07550500                                                                                                                                                                                                                                                                                                                                                                                                                                                                                                                                                                                                                                                                                                                                                                                                                                                                                                                                                                                                                                                                                                                                                                                                                                                                                                                                                                                                                                                                                                                                                                                                                                                                                                                                                                                                                                                                                                                                                                                                                                                                                                                                                                                                                                                                                                                                                                                                                   | 1.17648700                                                                          | 0.99983800                                                                            |             |             |   |             |             |             |   |             |             |             |   |             |             |             |   |             |             |             |   |             |            |             |   |             |             |             |   |             |             |             |   |             |             |             |   |             |             |             |   |             |             |             |   |             |             |            |   |             |             |             |   |             |             |             |   |             |             |             |   |             |             |             |   |             |             |             |   |             |             |             |                                                                                                                                                                                                                                                                                                                                                                                                                                                                                                                                                                                                                                                                                                                                                                                                                                                                                                                                                                                                                                                                                                                                                                                                                                                                                                                                                                                                                                                                                                                                                                                                                                                                                                                                                                           |            |             |             |            |            |             |             |            |            |            |            |             |            |             |             |             |            |             |             |             |            |             |             |            |            |             |             |            |            |             |            |            |            |             |             |            |            |            |            |            |            |            |            |                                                                                                                                                                                                                                                                                                                                                                                                                                                                                                                                                                                                                                                                                                                                                                                                                                                                                                                                                                                                                                                                                                                                                                                                                                                                                                                                                                                                                                                                                                                                                                                                                                                                                                                                                                                                                                                                                                                                                                                                                                                                                                                                                                                                                                                                                                                                                                                                                                                                                                                                                                                                                                                                            |   |            |             |             |   |            |             |             |   |            |             |            |   |            |             |            |   |            |             |            |   |            |             |             |   |             |             |             |   |             |             |             |   |             |             |             |   |             |             |             |                                                                                                                                                                                                                                                                                                                                                                                                                                                                                                                                                                                                                                                                                                                                                                                                                                                                                                                                                                                                                                                                                                                                                                                                                                                                                                                                                                                                                                                                                                                                                                                                                                                                                                                                                                            |            |             |             |            |            |             |             |            |            |             |             |             |            |            |            |             |            |             |             |             |            |             |             |            |             |             |             |            |             |             |             |            |             |            |            |            |             |            |            |            |            |            |             |             |             |             |             |             |             |             |             |             |             |             |             |            |             |             |             |            |             |             |             |            |             |             |             |            |             |             |             |             |             |             |             |             |             |             |            |             |             |             |             |             |             |             |             |                                                                                                                                                                                                                                                                                                                                                                                                                                                                                                                                                                                                                                                                                                                                                                                                                                                                                                                                                                                                                                                                                                                                                                                                                                                                                                                                                                                                                                                                                                                                                                                                                                                                                                                                                                                                                                                                                                                                                                                                                                                                                                                                                                                                                                                                                                                                                                                                                                                                                                                                                                                                                                                                         |   |            |             |            |   |            |            |            |   |            |             |            |   |            |            |            |   |            |            |            |   |            |            |             |   |            |            |             |   |            |             |             |   |            |            |             |   |            |             |            |   |            |             |            |   |            |             |             |   |            |             |             |   |            |             |            |   |            |             |            |   |            |             |             |   |             |            |            |   |             |            |            |   |             |            |             |   |             |            |             |   |            |            |            |   |             |             |            |   |             |            |            |   |             |             |             |   |             |             |            |   |             |            |            |   |             |             |             |   |             |             |             |   |             |             |             |   |             |            |            |   |             |             |             |   |             |             |             |
| C                 | 3.43351100                                                                                                                                                                                                                                                                                                                                                                                                                                                                                                                                                                                                                                                                                                                                                                                                                                                                                                                                                                                                                                                                                                                                                                                                                                                                                                                                                                                                                                                                                                                                                                                                                                                                                                                                                                                                                                                                                                                                                                                                                                                                                                                                                                                                                                                                                                                                                                                                                   | -0.07543700                                                                         | -1.33734400                                                                           |             |             |   |             |             |             |   |             |             |             |   |             |             |             |   |             |             |             |   |             |            |             |   |             |             |             |   |             |             |             |   |             |             |             |   |             |             |             |   |             |             |             |   |             |             |            |   |             |             |             |   |             |             |             |   |             |             |             |   |             |             |             |   |             |             |             |   |             |             |             |                                                                                                                                                                                                                                                                                                                                                                                                                                                                                                                                                                                                                                                                                                                                                                                                                                                                                                                                                                                                                                                                                                                                                                                                                                                                                                                                                                                                                                                                                                                                                                                                                                                                                                                                                                           |            |             |             |            |            |             |             |            |            |            |            |             |            |             |             |             |            |             |             |             |            |             |             |            |            |             |             |            |            |             |            |            |            |             |             |            |            |            |            |            |            |            |            |                                                                                                                                                                                                                                                                                                                                                                                                                                                                                                                                                                                                                                                                                                                                                                                                                                                                                                                                                                                                                                                                                                                                                                                                                                                                                                                                                                                                                                                                                                                                                                                                                                                                                                                                                                                                                                                                                                                                                                                                                                                                                                                                                                                                                                                                                                                                                                                                                                                                                                                                                                                                                                                                            |   |            |             |             |   |            |             |             |   |            |             |            |   |            |             |            |   |            |             |            |   |            |             |             |   |             |             |             |   |             |             |             |   |             |             |             |   |             |             |             |                                                                                                                                                                                                                                                                                                                                                                                                                                                                                                                                                                                                                                                                                                                                                                                                                                                                                                                                                                                                                                                                                                                                                                                                                                                                                                                                                                                                                                                                                                                                                                                                                                                                                                                                                                            |            |             |             |            |            |             |             |            |            |             |             |             |            |            |            |             |            |             |             |             |            |             |             |            |             |             |             |            |             |             |             |            |             |            |            |            |             |            |            |            |            |            |             |             |             |             |             |             |             |             |             |             |             |             |             |            |             |             |             |            |             |             |             |            |             |             |             |            |             |             |             |             |             |             |             |             |             |             |            |             |             |             |             |             |             |             |             |                                                                                                                                                                                                                                                                                                                                                                                                                                                                                                                                                                                                                                                                                                                                                                                                                                                                                                                                                                                                                                                                                                                                                                                                                                                                                                                                                                                                                                                                                                                                                                                                                                                                                                                                                                                                                                                                                                                                                                                                                                                                                                                                                                                                                                                                                                                                                                                                                                                                                                                                                                                                                                                                         |   |            |             |            |   |            |            |            |   |            |             |            |   |            |            |            |   |            |            |            |   |            |            |             |   |            |            |             |   |            |             |             |   |            |            |             |   |            |             |            |   |            |             |            |   |            |             |             |   |            |             |             |   |            |             |            |   |            |             |            |   |            |             |             |   |             |            |            |   |             |            |            |   |             |            |             |   |             |            |             |   |            |            |            |   |             |             |            |   |             |            |            |   |             |             |             |   |             |             |            |   |             |            |            |   |             |             |             |   |             |             |             |   |             |             |             |   |             |            |            |   |             |             |             |   |             |             |             |
| H                 | 4.45245400                                                                                                                                                                                                                                                                                                                                                                                                                                                                                                                                                                                                                                                                                                                                                                                                                                                                                                                                                                                                                                                                                                                                                                                                                                                                                                                                                                                                                                                                                                                                                                                                                                                                                                                                                                                                                                                                                                                                                                                                                                                                                                                                                                                                                                                                                                                                                                                                                   | -0.37329500                                                                         | -1.58934800                                                                           |             |             |   |             |             |             |   |             |             |             |   |             |             |             |   |             |             |             |   |             |            |             |   |             |             |             |   |             |             |             |   |             |             |             |   |             |             |             |   |             |             |             |   |             |             |            |   |             |             |             |   |             |             |             |   |             |             |             |   |             |             |             |   |             |             |             |   |             |             |             |                                                                                                                                                                                                                                                                                                                                                                                                                                                                                                                                                                                                                                                                                                                                                                                                                                                                                                                                                                                                                                                                                                                                                                                                                                                                                                                                                                                                                                                                                                                                                                                                                                                                                                                                                                           |            |             |             |            |            |             |             |            |            |            |            |             |            |             |             |             |            |             |             |             |            |             |             |            |            |             |             |            |            |             |            |            |            |             |             |            |            |            |            |            |            |            |            |                                                                                                                                                                                                                                                                                                                                                                                                                                                                                                                                                                                                                                                                                                                                                                                                                                                                                                                                                                                                                                                                                                                                                                                                                                                                                                                                                                                                                                                                                                                                                                                                                                                                                                                                                                                                                                                                                                                                                                                                                                                                                                                                                                                                                                                                                                                                                                                                                                                                                                                                                                                                                                                                            |   |            |             |             |   |            |             |             |   |            |             |            |   |            |             |            |   |            |             |            |   |            |             |             |   |             |             |             |   |             |             |             |   |             |             |             |   |             |             |             |                                                                                                                                                                                                                                                                                                                                                                                                                                                                                                                                                                                                                                                                                                                                                                                                                                                                                                                                                                                                                                                                                                                                                                                                                                                                                                                                                                                                                                                                                                                                                                                                                                                                                                                                                                            |            |             |             |            |            |             |             |            |            |             |             |             |            |            |            |             |            |             |             |             |            |             |             |            |             |             |             |            |             |             |             |            |             |            |            |            |             |            |            |            |            |            |             |             |             |             |             |             |             |             |             |             |             |             |             |            |             |             |             |            |             |             |             |            |             |             |             |            |             |             |             |             |             |             |             |             |             |             |            |             |             |             |             |             |             |             |             |                                                                                                                                                                                                                                                                                                                                                                                                                                                                                                                                                                                                                                                                                                                                                                                                                                                                                                                                                                                                                                                                                                                                                                                                                                                                                                                                                                                                                                                                                                                                                                                                                                                                                                                                                                                                                                                                                                                                                                                                                                                                                                                                                                                                                                                                                                                                                                                                                                                                                                                                                                                                                                                                         |   |            |             |            |   |            |            |            |   |            |             |            |   |            |            |            |   |            |            |            |   |            |            |             |   |            |            |             |   |            |             |             |   |            |            |             |   |            |             |            |   |            |             |            |   |            |             |             |   |            |             |             |   |            |             |            |   |            |             |            |   |            |             |             |   |             |            |            |   |             |            |            |   |             |            |             |   |             |            |             |   |            |            |            |   |             |             |            |   |             |            |            |   |             |             |             |   |             |             |            |   |             |            |            |   |             |             |             |   |             |             |             |   |             |             |             |   |             |            |            |   |             |             |             |   |             |             |             |
| H                 | 2.75175300                                                                                                                                                                                                                                                                                                                                                                                                                                                                                                                                                                                                                                                                                                                                                                                                                                                                                                                                                                                                                                                                                                                                                                                                                                                                                                                                                                                                                                                                                                                                                                                                                                                                                                                                                                                                                                                                                                                                                                                                                                                                                                                                                                                                                                                                                                                                                                                                                   | -0.52076700                                                                         | -2.05793900                                                                           |             |             |   |             |             |             |   |             |             |             |   |             |             |             |   |             |             |             |   |             |            |             |   |             |             |             |   |             |             |             |   |             |             |             |   |             |             |             |   |             |             |             |   |             |             |            |   |             |             |             |   |             |             |             |   |             |             |             |   |             |             |             |   |             |             |             |   |             |             |             |                                                                                                                                                                                                                                                                                                                                                                                                                                                                                                                                                                                                                                                                                                                                                                                                                                                                                                                                                                                                                                                                                                                                                                                                                                                                                                                                                                                                                                                                                                                                                                                                                                                                                                                                                                           |            |             |             |            |            |             |             |            |            |            |            |             |            |             |             |             |            |             |             |             |            |             |             |            |            |             |             |            |            |             |            |            |            |             |             |            |            |            |            |            |            |            |            |                                                                                                                                                                                                                                                                                                                                                                                                                                                                                                                                                                                                                                                                                                                                                                                                                                                                                                                                                                                                                                                                                                                                                                                                                                                                                                                                                                                                                                                                                                                                                                                                                                                                                                                                                                                                                                                                                                                                                                                                                                                                                                                                                                                                                                                                                                                                                                                                                                                                                                                                                                                                                                                                            |   |            |             |             |   |            |             |             |   |            |             |            |   |            |             |            |   |            |             |            |   |            |             |             |   |             |             |             |   |             |             |             |   |             |             |             |   |             |             |             |                                                                                                                                                                                                                                                                                                                                                                                                                                                                                                                                                                                                                                                                                                                                                                                                                                                                                                                                                                                                                                                                                                                                                                                                                                                                                                                                                                                                                                                                                                                                                                                                                                                                                                                                                                            |            |             |             |            |            |             |             |            |            |             |             |             |            |            |            |             |            |             |             |             |            |             |             |            |             |             |             |            |             |             |             |            |             |            |            |            |             |            |            |            |            |            |             |             |             |             |             |             |             |             |             |             |             |             |             |            |             |             |             |            |             |             |             |            |             |             |             |            |             |             |             |             |             |             |             |             |             |             |            |             |             |             |             |             |             |             |             |                                                                                                                                                                                                                                                                                                                                                                                                                                                                                                                                                                                                                                                                                                                                                                                                                                                                                                                                                                                                                                                                                                                                                                                                                                                                                                                                                                                                                                                                                                                                                                                                                                                                                                                                                                                                                                                                                                                                                                                                                                                                                                                                                                                                                                                                                                                                                                                                                                                                                                                                                                                                                                                                         |   |            |             |            |   |            |            |            |   |            |             |            |   |            |            |            |   |            |            |            |   |            |            |             |   |            |            |             |   |            |             |             |   |            |            |             |   |            |             |            |   |            |             |            |   |            |             |             |   |            |             |             |   |            |             |            |   |            |             |            |   |            |             |             |   |             |            |            |   |             |            |            |   |             |            |             |   |             |            |             |   |            |            |            |   |             |             |            |   |             |            |            |   |             |             |             |   |             |             |            |   |             |            |            |   |             |             |             |   |             |             |             |   |             |             |             |   |             |            |            |   |             |             |             |   |             |             |             |
| H                 | 3.36716800                                                                                                                                                                                                                                                                                                                                                                                                                                                                                                                                                                                                                                                                                                                                                                                                                                                                                                                                                                                                                                                                                                                                                                                                                                                                                                                                                                                                                                                                                                                                                                                                                                                                                                                                                                                                                                                                                                                                                                                                                                                                                                                                                                                                                                                                                                                                                                                                                   | 1.01108200                                                                          | -1.40952800                                                                           |             |             |   |             |             |             |   |             |             |             |   |             |             |             |   |             |             |             |   |             |            |             |   |             |             |             |   |             |             |             |   |             |             |             |   |             |             |             |   |             |             |             |   |             |             |            |   |             |             |             |   |             |             |             |   |             |             |             |   |             |             |             |   |             |             |             |   |             |             |             |                                                                                                                                                                                                                                                                                                                                                                                                                                                                                                                                                                                                                                                                                                                                                                                                                                                                                                                                                                                                                                                                                                                                                                                                                                                                                                                                                                                                                                                                                                                                                                                                                                                                                                                                                                           |            |             |             |            |            |             |             |            |            |            |            |             |            |             |             |             |            |             |             |             |            |             |             |            |            |             |             |            |            |             |            |            |            |             |             |            |            |            |            |            |            |            |            |                                                                                                                                                                                                                                                                                                                                                                                                                                                                                                                                                                                                                                                                                                                                                                                                                                                                                                                                                                                                                                                                                                                                                                                                                                                                                                                                                                                                                                                                                                                                                                                                                                                                                                                                                                                                                                                                                                                                                                                                                                                                                                                                                                                                                                                                                                                                                                                                                                                                                                                                                                                                                                                                            |   |            |             |             |   |            |             |             |   |            |             |            |   |            |             |            |   |            |             |            |   |            |             |             |   |             |             |             |   |             |             |             |   |             |             |             |   |             |             |             |                                                                                                                                                                                                                                                                                                                                                                                                                                                                                                                                                                                                                                                                                                                                                                                                                                                                                                                                                                                                                                                                                                                                                                                                                                                                                                                                                                                                                                                                                                                                                                                                                                                                                                                                                                            |            |             |             |            |            |             |             |            |            |             |             |             |            |            |            |             |            |             |             |             |            |             |             |            |             |             |             |            |             |             |             |            |             |            |            |            |             |            |            |            |            |            |             |             |             |             |             |             |             |             |             |             |             |             |             |            |             |             |             |            |             |             |             |            |             |             |             |            |             |             |             |             |             |             |             |             |             |             |            |             |             |             |             |             |             |             |             |                                                                                                                                                                                                                                                                                                                                                                                                                                                                                                                                                                                                                                                                                                                                                                                                                                                                                                                                                                                                                                                                                                                                                                                                                                                                                                                                                                                                                                                                                                                                                                                                                                                                                                                                                                                                                                                                                                                                                                                                                                                                                                                                                                                                                                                                                                                                                                                                                                                                                                                                                                                                                                                                         |   |            |             |            |   |            |            |            |   |            |             |            |   |            |            |            |   |            |            |            |   |            |            |             |   |            |            |             |   |            |             |             |   |            |            |             |   |            |             |            |   |            |             |            |   |            |             |             |   |            |             |             |   |            |             |            |   |            |             |            |   |            |             |             |   |             |            |            |   |             |            |            |   |             |            |             |   |             |            |             |   |            |            |            |   |             |             |            |   |             |            |            |   |             |             |             |   |             |             |            |   |             |            |            |   |             |             |             |   |             |             |             |   |             |             |             |   |             |            |            |   |             |             |             |   |             |             |             |
| C                 | 3.12070200                                                                                                                                                                                                                                                                                                                                                                                                                                                                                                                                                                                                                                                                                                                                                                                                                                                                                                                                                                                                                                                                                                                                                                                                                                                                                                                                                                                                                                                                                                                                                                                                                                                                                                                                                                                                                                                                                                                                                                                                                                                                                                                                                                                                                                                                                                                                                                                                                   | -2.04830300                                                                         | 0.21487800                                                                            |             |             |   |             |             |             |   |             |             |             |   |             |             |             |   |             |             |             |   |             |            |             |   |             |             |             |   |             |             |             |   |             |             |             |   |             |             |             |   |             |             |             |   |             |             |            |   |             |             |             |   |             |             |             |   |             |             |             |   |             |             |             |   |             |             |             |   |             |             |             |                                                                                                                                                                                                                                                                                                                                                                                                                                                                                                                                                                                                                                                                                                                                                                                                                                                                                                                                                                                                                                                                                                                                                                                                                                                                                                                                                                                                                                                                                                                                                                                                                                                                                                                                                                           |            |             |             |            |            |             |             |            |            |            |            |             |            |             |             |             |            |             |             |             |            |             |             |            |            |             |             |            |            |             |            |            |            |             |             |            |            |            |            |            |            |            |            |                                                                                                                                                                                                                                                                                                                                                                                                                                                                                                                                                                                                                                                                                                                                                                                                                                                                                                                                                                                                                                                                                                                                                                                                                                                                                                                                                                                                                                                                                                                                                                                                                                                                                                                                                                                                                                                                                                                                                                                                                                                                                                                                                                                                                                                                                                                                                                                                                                                                                                                                                                                                                                                                            |   |            |             |             |   |            |             |             |   |            |             |            |   |            |             |            |   |            |             |            |   |            |             |             |   |             |             |             |   |             |             |             |   |             |             |             |   |             |             |             |                                                                                                                                                                                                                                                                                                                                                                                                                                                                                                                                                                                                                                                                                                                                                                                                                                                                                                                                                                                                                                                                                                                                                                                                                                                                                                                                                                                                                                                                                                                                                                                                                                                                                                                                                                            |            |             |             |            |            |             |             |            |            |             |             |             |            |            |            |             |            |             |             |             |            |             |             |            |             |             |             |            |             |             |             |            |             |            |            |            |             |            |            |            |            |            |             |             |             |             |             |             |             |             |             |             |             |             |             |            |             |             |             |            |             |             |             |            |             |             |             |            |             |             |             |             |             |             |             |             |             |             |            |             |             |             |             |             |             |             |             |                                                                                                                                                                                                                                                                                                                                                                                                                                                                                                                                                                                                                                                                                                                                                                                                                                                                                                                                                                                                                                                                                                                                                                                                                                                                                                                                                                                                                                                                                                                                                                                                                                                                                                                                                                                                                                                                                                                                                                                                                                                                                                                                                                                                                                                                                                                                                                                                                                                                                                                                                                                                                                                                         |   |            |             |            |   |            |            |            |   |            |             |            |   |            |            |            |   |            |            |            |   |            |            |             |   |            |            |             |   |            |             |             |   |            |            |             |   |            |             |            |   |            |             |            |   |            |             |             |   |            |             |             |   |            |             |            |   |            |             |            |   |            |             |             |   |             |            |            |   |             |            |            |   |             |            |             |   |             |            |             |   |            |            |            |   |             |             |            |   |             |            |            |   |             |             |             |   |             |             |            |   |             |            |            |   |             |             |             |   |             |             |             |   |             |             |             |   |             |            |            |   |             |             |             |   |             |             |             |
| H                 | 2.82404600                                                                                                                                                                                                                                                                                                                                                                                                                                                                                                                                                                                                                                                                                                                                                                                                                                                                                                                                                                                                                                                                                                                                                                                                                                                                                                                                                                                                                                                                                                                                                                                                                                                                                                                                                                                                                                                                                                                                                                                                                                                                                                                                                                                                                                                                                                                                                                                                                   | -2.33906500                                                                         | 1.22404400                                                                            |             |             |   |             |             |             |   |             |             |             |   |             |             |             |   |             |             |             |   |             |            |             |   |             |             |             |   |             |             |             |   |             |             |             |   |             |             |             |   |             |             |             |   |             |             |            |   |             |             |             |   |             |             |             |   |             |             |             |   |             |             |             |   |             |             |             |   |             |             |             |                                                                                                                                                                                                                                                                                                                                                                                                                                                                                                                                                                                                                                                                                                                                                                                                                                                                                                                                                                                                                                                                                                                                                                                                                                                                                                                                                                                                                                                                                                                                                                                                                                                                                                                                                                           |            |             |             |            |            |             |             |            |            |            |            |             |            |             |             |             |            |             |             |             |            |             |             |            |            |             |             |            |            |             |            |            |            |             |             |            |            |            |            |            |            |            |            |                                                                                                                                                                                                                                                                                                                                                                                                                                                                                                                                                                                                                                                                                                                                                                                                                                                                                                                                                                                                                                                                                                                                                                                                                                                                                                                                                                                                                                                                                                                                                                                                                                                                                                                                                                                                                                                                                                                                                                                                                                                                                                                                                                                                                                                                                                                                                                                                                                                                                                                                                                                                                                                                            |   |            |             |             |   |            |             |             |   |            |             |            |   |            |             |            |   |            |             |            |   |            |             |             |   |             |             |             |   |             |             |             |   |             |             |             |   |             |             |             |                                                                                                                                                                                                                                                                                                                                                                                                                                                                                                                                                                                                                                                                                                                                                                                                                                                                                                                                                                                                                                                                                                                                                                                                                                                                                                                                                                                                                                                                                                                                                                                                                                                                                                                                                                            |            |             |             |            |            |             |             |            |            |             |             |             |            |            |            |             |            |             |             |             |            |             |             |            |             |             |             |            |             |             |             |            |             |            |            |            |             |            |            |            |            |            |             |             |             |             |             |             |             |             |             |             |             |             |             |            |             |             |             |            |             |             |             |            |             |             |             |            |             |             |             |             |             |             |             |             |             |             |            |             |             |             |             |             |             |             |             |                                                                                                                                                                                                                                                                                                                                                                                                                                                                                                                                                                                                                                                                                                                                                                                                                                                                                                                                                                                                                                                                                                                                                                                                                                                                                                                                                                                                                                                                                                                                                                                                                                                                                                                                                                                                                                                                                                                                                                                                                                                                                                                                                                                                                                                                                                                                                                                                                                                                                                                                                                                                                                                                         |   |            |             |            |   |            |            |            |   |            |             |            |   |            |            |            |   |            |            |            |   |            |            |             |   |            |            |             |   |            |             |             |   |            |            |             |   |            |             |            |   |            |             |            |   |            |             |             |   |            |             |             |   |            |             |            |   |            |             |            |   |            |             |             |   |             |            |            |   |             |            |            |   |             |            |             |   |             |            |             |   |            |            |            |   |             |             |            |   |             |            |            |   |             |             |             |   |             |             |            |   |             |            |            |   |             |             |             |   |             |             |             |   |             |             |             |   |             |            |            |   |             |             |             |   |             |             |             |
| H                 | 2.44553100                                                                                                                                                                                                                                                                                                                                                                                                                                                                                                                                                                                                                                                                                                                                                                                                                                                                                                                                                                                                                                                                                                                                                                                                                                                                                                                                                                                                                                                                                                                                                                                                                                                                                                                                                                                                                                                                                                                                                                                                                                                                                                                                                                                                                                                                                                                                                                                                                   | -2.51104200                                                                         | -0.50099600                                                                           |             |             |   |             |             |             |   |             |             |             |   |             |             |             |   |             |             |             |   |             |            |             |   |             |             |             |   |             |             |             |   |             |             |             |   |             |             |             |   |             |             |             |   |             |             |            |   |             |             |             |   |             |             |             |   |             |             |             |   |             |             |             |   |             |             |             |   |             |             |             |                                                                                                                                                                                                                                                                                                                                                                                                                                                                                                                                                                                                                                                                                                                                                                                                                                                                                                                                                                                                                                                                                                                                                                                                                                                                                                                                                                                                                                                                                                                                                                                                                                                                                                                                                                           |            |             |             |            |            |             |             |            |            |            |            |             |            |             |             |             |            |             |             |             |            |             |             |            |            |             |             |            |            |             |            |            |            |             |             |            |            |            |            |            |            |            |            |                                                                                                                                                                                                                                                                                                                                                                                                                                                                                                                                                                                                                                                                                                                                                                                                                                                                                                                                                                                                                                                                                                                                                                                                                                                                                                                                                                                                                                                                                                                                                                                                                                                                                                                                                                                                                                                                                                                                                                                                                                                                                                                                                                                                                                                                                                                                                                                                                                                                                                                                                                                                                                                                            |   |            |             |             |   |            |             |             |   |            |             |            |   |            |             |            |   |            |             |            |   |            |             |             |   |             |             |             |   |             |             |             |   |             |             |             |   |             |             |             |                                                                                                                                                                                                                                                                                                                                                                                                                                                                                                                                                                                                                                                                                                                                                                                                                                                                                                                                                                                                                                                                                                                                                                                                                                                                                                                                                                                                                                                                                                                                                                                                                                                                                                                                                                            |            |             |             |            |            |             |             |            |            |             |             |             |            |            |            |             |            |             |             |             |            |             |             |            |             |             |             |            |             |             |             |            |             |            |            |            |             |            |            |            |            |            |             |             |             |             |             |             |             |             |             |             |             |             |             |            |             |             |             |            |             |             |             |            |             |             |             |            |             |             |             |             |             |             |             |             |             |             |            |             |             |             |             |             |             |             |             |                                                                                                                                                                                                                                                                                                                                                                                                                                                                                                                                                                                                                                                                                                                                                                                                                                                                                                                                                                                                                                                                                                                                                                                                                                                                                                                                                                                                                                                                                                                                                                                                                                                                                                                                                                                                                                                                                                                                                                                                                                                                                                                                                                                                                                                                                                                                                                                                                                                                                                                                                                                                                                                                         |   |            |             |            |   |            |            |            |   |            |             |            |   |            |            |            |   |            |            |            |   |            |            |             |   |            |            |             |   |            |             |             |   |            |            |             |   |            |             |            |   |            |             |            |   |            |             |             |   |            |             |             |   |            |             |            |   |            |             |            |   |            |             |             |   |             |            |            |   |             |            |            |   |             |            |             |   |             |            |             |   |            |            |            |   |             |             |            |   |             |            |            |   |             |             |             |   |             |             |            |   |             |            |            |   |             |             |             |   |             |             |             |   |             |             |             |   |             |            |            |   |             |             |             |   |             |             |             |
| H                 | 4.13020400                                                                                                                                                                                                                                                                                                                                                                                                                                                                                                                                                                                                                                                                                                                                                                                                                                                                                                                                                                                                                                                                                                                                                                                                                                                                                                                                                                                                                                                                                                                                                                                                                                                                                                                                                                                                                                                                                                                                                                                                                                                                                                                                                                                                                                                                                                                                                                                                                   | -2.42149600                                                                         | 0.03565500                                                                            |             |             |   |             |             |             |   |             |             |             |   |             |             |             |   |             |             |             |   |             |            |             |   |             |             |             |   |             |             |             |   |             |             |             |   |             |             |             |   |             |             |             |   |             |             |            |   |             |             |             |   |             |             |             |   |             |             |             |   |             |             |             |   |             |             |             |   |             |             |             |                                                                                                                                                                                                                                                                                                                                                                                                                                                                                                                                                                                                                                                                                                                                                                                                                                                                                                                                                                                                                                                                                                                                                                                                                                                                                                                                                                                                                                                                                                                                                                                                                                                                                                                                                                           |            |             |             |            |            |             |             |            |            |            |            |             |            |             |             |             |            |             |             |             |            |             |             |            |            |             |             |            |            |             |            |            |            |             |             |            |            |            |            |            |            |            |            |                                                                                                                                                                                                                                                                                                                                                                                                                                                                                                                                                                                                                                                                                                                                                                                                                                                                                                                                                                                                                                                                                                                                                                                                                                                                                                                                                                                                                                                                                                                                                                                                                                                                                                                                                                                                                                                                                                                                                                                                                                                                                                                                                                                                                                                                                                                                                                                                                                                                                                                                                                                                                                                                            |   |            |             |             |   |            |             |             |   |            |             |            |   |            |             |            |   |            |             |            |   |            |             |             |   |             |             |             |   |             |             |             |   |             |             |             |   |             |             |             |                                                                                                                                                                                                                                                                                                                                                                                                                                                                                                                                                                                                                                                                                                                                                                                                                                                                                                                                                                                                                                                                                                                                                                                                                                                                                                                                                                                                                                                                                                                                                                                                                                                                                                                                                                            |            |             |             |            |            |             |             |            |            |             |             |             |            |            |            |             |            |             |             |             |            |             |             |            |             |             |             |            |             |             |             |            |             |            |            |            |             |            |            |            |            |            |             |             |             |             |             |             |             |             |             |             |             |             |             |            |             |             |             |            |             |             |             |            |             |             |             |            |             |             |             |             |             |             |             |             |             |             |            |             |             |             |             |             |             |             |             |                                                                                                                                                                                                                                                                                                                                                                                                                                                                                                                                                                                                                                                                                                                                                                                                                                                                                                                                                                                                                                                                                                                                                                                                                                                                                                                                                                                                                                                                                                                                                                                                                                                                                                                                                                                                                                                                                                                                                                                                                                                                                                                                                                                                                                                                                                                                                                                                                                                                                                                                                                                                                                                                         |   |            |             |            |   |            |            |            |   |            |             |            |   |            |            |            |   |            |            |            |   |            |            |             |   |            |            |             |   |            |             |             |   |            |            |             |   |            |             |            |   |            |             |            |   |            |             |             |   |            |             |             |   |            |             |            |   |            |             |            |   |            |             |             |   |             |            |            |   |             |            |            |   |             |            |             |   |             |            |             |   |            |            |            |   |             |             |            |   |             |            |            |   |             |             |             |   |             |             |            |   |             |            |            |   |             |             |             |   |             |             |             |   |             |             |             |   |             |            |            |   |             |             |             |   |             |             |             |
| O                 | 1.83628100                                                                                                                                                                                                                                                                                                                                                                                                                                                                                                                                                                                                                                                                                                                                                                                                                                                                                                                                                                                                                                                                                                                                                                                                                                                                                                                                                                                                                                                                                                                                                                                                                                                                                                                                                                                                                                                                                                                                                                                                                                                                                                                                                                                                                                                                                                                                                                                                                   | 0.01318200                                                                          | 0.51652000                                                                            |             |             |   |             |             |             |   |             |             |             |   |             |             |             |   |             |             |             |   |             |            |             |   |             |             |             |   |             |             |             |   |             |             |             |   |             |             |             |   |             |             |             |   |             |             |            |   |             |             |             |   |             |             |             |   |             |             |             |   |             |             |             |   |             |             |             |   |             |             |             |                                                                                                                                                                                                                                                                                                                                                                                                                                                                                                                                                                                                                                                                                                                                                                                                                                                                                                                                                                                                                                                                                                                                                                                                                                                                                                                                                                                                                                                                                                                                                                                                                                                                                                                                                                           |            |             |             |            |            |             |             |            |            |            |            |             |            |             |             |             |            |             |             |             |            |             |             |            |            |             |             |            |            |             |            |            |            |             |             |            |            |            |            |            |            |            |            |                                                                                                                                                                                                                                                                                                                                                                                                                                                                                                                                                                                                                                                                                                                                                                                                                                                                                                                                                                                                                                                                                                                                                                                                                                                                                                                                                                                                                                                                                                                                                                                                                                                                                                                                                                                                                                                                                                                                                                                                                                                                                                                                                                                                                                                                                                                                                                                                                                                                                                                                                                                                                                                                            |   |            |             |             |   |            |             |             |   |            |             |            |   |            |             |            |   |            |             |            |   |            |             |             |   |             |             |             |   |             |             |             |   |             |             |             |   |             |             |             |                                                                                                                                                                                                                                                                                                                                                                                                                                                                                                                                                                                                                                                                                                                                                                                                                                                                                                                                                                                                                                                                                                                                                                                                                                                                                                                                                                                                                                                                                                                                                                                                                                                                                                                                                                            |            |             |             |            |            |             |             |            |            |             |             |             |            |            |            |             |            |             |             |             |            |             |             |            |             |             |             |            |             |             |             |            |             |            |            |            |             |            |            |            |            |            |             |             |             |             |             |             |             |             |             |             |             |             |             |            |             |             |             |            |             |             |             |            |             |             |             |            |             |             |             |             |             |             |             |             |             |             |            |             |             |             |             |             |             |             |             |                                                                                                                                                                                                                                                                                                                                                                                                                                                                                                                                                                                                                                                                                                                                                                                                                                                                                                                                                                                                                                                                                                                                                                                                                                                                                                                                                                                                                                                                                                                                                                                                                                                                                                                                                                                                                                                                                                                                                                                                                                                                                                                                                                                                                                                                                                                                                                                                                                                                                                                                                                                                                                                                         |   |            |             |            |   |            |            |            |   |            |             |            |   |            |            |            |   |            |            |            |   |            |            |             |   |            |            |             |   |            |             |             |   |            |            |             |   |            |             |            |   |            |             |            |   |            |             |             |   |            |             |             |   |            |             |            |   |            |             |            |   |            |             |             |   |             |            |            |   |             |            |            |   |             |            |             |   |             |            |             |   |            |            |            |   |             |             |            |   |             |            |            |   |             |             |             |   |             |             |            |   |             |            |            |   |             |             |             |   |             |             |             |   |             |             |             |   |             |            |            |   |             |             |             |   |             |             |             |
| C                 | 0.68878900                                                                                                                                                                                                                                                                                                                                                                                                                                                                                                                                                                                                                                                                                                                                                                                                                                                                                                                                                                                                                                                                                                                                                                                                                                                                                                                                                                                                                                                                                                                                                                                                                                                                                                                                                                                                                                                                                                                                                                                                                                                                                                                                                                                                                                                                                                                                                                                                                   | -0.25731800                                                                         | -0.10407900                                                                           |             |             |   |             |             |             |   |             |             |             |   |             |             |             |   |             |             |             |   |             |            |             |   |             |             |             |   |             |             |             |   |             |             |             |   |             |             |             |   |             |             |             |   |             |             |            |   |             |             |             |   |             |             |             |   |             |             |             |   |             |             |             |   |             |             |             |   |             |             |             |                                                                                                                                                                                                                                                                                                                                                                                                                                                                                                                                                                                                                                                                                                                                                                                                                                                                                                                                                                                                                                                                                                                                                                                                                                                                                                                                                                                                                                                                                                                                                                                                                                                                                                                                                                           |            |             |             |            |            |             |             |            |            |            |            |             |            |             |             |             |            |             |             |             |            |             |             |            |            |             |             |            |            |             |            |            |            |             |             |            |            |            |            |            |            |            |            |                                                                                                                                                                                                                                                                                                                                                                                                                                                                                                                                                                                                                                                                                                                                                                                                                                                                                                                                                                                                                                                                                                                                                                                                                                                                                                                                                                                                                                                                                                                                                                                                                                                                                                                                                                                                                                                                                                                                                                                                                                                                                                                                                                                                                                                                                                                                                                                                                                                                                                                                                                                                                                                                            |   |            |             |             |   |            |             |             |   |            |             |            |   |            |             |            |   |            |             |            |   |            |             |             |   |             |             |             |   |             |             |             |   |             |             |             |   |             |             |             |                                                                                                                                                                                                                                                                                                                                                                                                                                                                                                                                                                                                                                                                                                                                                                                                                                                                                                                                                                                                                                                                                                                                                                                                                                                                                                                                                                                                                                                                                                                                                                                                                                                                                                                                                                            |            |             |             |            |            |             |             |            |            |             |             |             |            |            |            |             |            |             |             |             |            |             |             |            |             |             |             |            |             |             |             |            |             |            |            |            |             |            |            |            |            |            |             |             |             |             |             |             |             |             |             |             |             |             |             |            |             |             |             |            |             |             |             |            |             |             |             |            |             |             |             |             |             |             |             |             |             |             |            |             |             |             |             |             |             |             |             |                                                                                                                                                                                                                                                                                                                                                                                                                                                                                                                                                                                                                                                                                                                                                                                                                                                                                                                                                                                                                                                                                                                                                                                                                                                                                                                                                                                                                                                                                                                                                                                                                                                                                                                                                                                                                                                                                                                                                                                                                                                                                                                                                                                                                                                                                                                                                                                                                                                                                                                                                                                                                                                                         |   |            |             |            |   |            |            |            |   |            |             |            |   |            |            |            |   |            |            |            |   |            |            |             |   |            |            |             |   |            |             |             |   |            |            |             |   |            |             |            |   |            |             |            |   |            |             |             |   |            |             |             |   |            |             |            |   |            |             |            |   |            |             |             |   |             |            |            |   |             |            |            |   |             |            |             |   |             |            |             |   |            |            |            |   |             |             |            |   |             |            |            |   |             |             |             |   |             |             |            |   |             |            |            |   |             |             |             |   |             |             |             |   |             |             |             |   |             |            |            |   |             |             |             |   |             |             |             |
| O                 | 0.57097100                                                                                                                                                                                                                                                                                                                                                                                                                                                                                                                                                                                                                                                                                                                                                                                                                                                                                                                                                                                                                                                                                                                                                                                                                                                                                                                                                                                                                                                                                                                                                                                                                                                                                                                                                                                                                                                                                                                                                                                                                                                                                                                                                                                                                                                                                                                                                                                                                   | -1.01156800                                                                         | -1.03821700                                                                           |             |             |   |             |             |             |   |             |             |             |   |             |             |             |   |             |             |             |   |             |            |             |   |             |             |             |   |             |             |             |   |             |             |             |   |             |             |             |   |             |             |             |   |             |             |            |   |             |             |             |   |             |             |             |   |             |             |             |   |             |             |             |   |             |             |             |   |             |             |             |                                                                                                                                                                                                                                                                                                                                                                                                                                                                                                                                                                                                                                                                                                                                                                                                                                                                                                                                                                                                                                                                                                                                                                                                                                                                                                                                                                                                                                                                                                                                                                                                                                                                                                                                                                           |            |             |             |            |            |             |             |            |            |            |            |             |            |             |             |             |            |             |             |             |            |             |             |            |            |             |             |            |            |             |            |            |            |             |             |            |            |            |            |            |            |            |            |                                                                                                                                                                                                                                                                                                                                                                                                                                                                                                                                                                                                                                                                                                                                                                                                                                                                                                                                                                                                                                                                                                                                                                                                                                                                                                                                                                                                                                                                                                                                                                                                                                                                                                                                                                                                                                                                                                                                                                                                                                                                                                                                                                                                                                                                                                                                                                                                                                                                                                                                                                                                                                                                            |   |            |             |             |   |            |             |             |   |            |             |            |   |            |             |            |   |            |             |            |   |            |             |             |   |             |             |             |   |             |             |             |   |             |             |             |   |             |             |             |                                                                                                                                                                                                                                                                                                                                                                                                                                                                                                                                                                                                                                                                                                                                                                                                                                                                                                                                                                                                                                                                                                                                                                                                                                                                                                                                                                                                                                                                                                                                                                                                                                                                                                                                                                            |            |             |             |            |            |             |             |            |            |             |             |             |            |            |            |             |            |             |             |             |            |             |             |            |             |             |             |            |             |             |             |            |             |            |            |            |             |            |            |            |            |            |             |             |             |             |             |             |             |             |             |             |             |             |             |            |             |             |             |            |             |             |             |            |             |             |             |            |             |             |             |             |             |             |             |             |             |             |            |             |             |             |             |             |             |             |             |                                                                                                                                                                                                                                                                                                                                                                                                                                                                                                                                                                                                                                                                                                                                                                                                                                                                                                                                                                                                                                                                                                                                                                                                                                                                                                                                                                                                                                                                                                                                                                                                                                                                                                                                                                                                                                                                                                                                                                                                                                                                                                                                                                                                                                                                                                                                                                                                                                                                                                                                                                                                                                                                         |   |            |             |            |   |            |            |            |   |            |             |            |   |            |            |            |   |            |            |            |   |            |            |             |   |            |            |             |   |            |             |             |   |            |            |             |   |            |             |            |   |            |             |            |   |            |             |             |   |            |             |             |   |            |             |            |   |            |             |            |   |            |             |             |   |             |            |            |   |             |            |            |   |             |            |             |   |             |            |             |   |            |            |            |   |             |             |            |   |             |            |            |   |             |             |             |   |             |             |            |   |             |            |            |   |             |             |             |   |             |             |             |   |             |             |             |   |             |            |            |   |             |             |             |   |             |             |             |
| C                 | -0.43279000                                                                                                                                                                                                                                                                                                                                                                                                                                                                                                                                                                                                                                                                                                                                                                                                                                                                                                                                                                                                                                                                                                                                                                                                                                                                                                                                                                                                                                                                                                                                                                                                                                                                                                                                                                                                                                                                                                                                                                                                                                                                                                                                                                                                                                                                                                                                                                                                                  | 0.52501400                                                                          | 0.54614900                                                                            |             |             |   |             |             |             |   |             |             |             |   |             |             |             |   |             |             |             |   |             |            |             |   |             |             |             |   |             |             |             |   |             |             |             |   |             |             |             |   |             |             |             |   |             |             |            |   |             |             |             |   |             |             |             |   |             |             |             |   |             |             |             |   |             |             |             |   |             |             |             |                                                                                                                                                                                                                                                                                                                                                                                                                                                                                                                                                                                                                                                                                                                                                                                                                                                                                                                                                                                                                                                                                                                                                                                                                                                                                                                                                                                                                                                                                                                                                                                                                                                                                                                                                                           |            |             |             |            |            |             |             |            |            |            |            |             |            |             |             |             |            |             |             |             |            |             |             |            |            |             |             |            |            |             |            |            |            |             |             |            |            |            |            |            |            |            |            |                                                                                                                                                                                                                                                                                                                                                                                                                                                                                                                                                                                                                                                                                                                                                                                                                                                                                                                                                                                                                                                                                                                                                                                                                                                                                                                                                                                                                                                                                                                                                                                                                                                                                                                                                                                                                                                                                                                                                                                                                                                                                                                                                                                                                                                                                                                                                                                                                                                                                                                                                                                                                                                                            |   |            |             |             |   |            |             |             |   |            |             |            |   |            |             |            |   |            |             |            |   |            |             |             |   |             |             |             |   |             |             |             |   |             |             |             |   |             |             |             |                                                                                                                                                                                                                                                                                                                                                                                                                                                                                                                                                                                                                                                                                                                                                                                                                                                                                                                                                                                                                                                                                                                                                                                                                                                                                                                                                                                                                                                                                                                                                                                                                                                                                                                                                                            |            |             |             |            |            |             |             |            |            |             |             |             |            |            |            |             |            |             |             |             |            |             |             |            |             |             |             |            |             |             |             |            |             |            |            |            |             |            |            |            |            |            |             |             |             |             |             |             |             |             |             |             |             |             |             |            |             |             |             |            |             |             |             |            |             |             |             |            |             |             |             |             |             |             |             |             |             |             |            |             |             |             |             |             |             |             |             |                                                                                                                                                                                                                                                                                                                                                                                                                                                                                                                                                                                                                                                                                                                                                                                                                                                                                                                                                                                                                                                                                                                                                                                                                                                                                                                                                                                                                                                                                                                                                                                                                                                                                                                                                                                                                                                                                                                                                                                                                                                                                                                                                                                                                                                                                                                                                                                                                                                                                                                                                                                                                                                                         |   |            |             |            |   |            |            |            |   |            |             |            |   |            |            |            |   |            |            |            |   |            |            |             |   |            |            |             |   |            |             |             |   |            |            |             |   |            |             |            |   |            |             |            |   |            |             |             |   |            |             |             |   |            |             |            |   |            |             |            |   |            |             |             |   |             |            |            |   |             |            |            |   |             |            |             |   |             |            |             |   |            |            |            |   |             |             |            |   |             |            |            |   |             |             |             |   |             |             |            |   |             |            |            |   |             |             |             |   |             |             |             |   |             |             |             |   |             |            |            |   |             |             |             |   |             |             |             |
| H                 | -0.25508800                                                                                                                                                                                                                                                                                                                                                                                                                                                                                                                                                                                                                                                                                                                                                                                                                                                                                                                                                                                                                                                                                                                                                                                                                                                                                                                                                                                                                                                                                                                                                                                                                                                                                                                                                                                                                                                                                                                                                                                                                                                                                                                                                                                                                                                                                                                                                                                                                  | 0.51868400                                                                          | 1.62091400                                                                            |             |             |   |             |             |             |   |             |             |             |   |             |             |             |   |             |             |             |   |             |            |             |   |             |             |             |   |             |             |             |   |             |             |             |   |             |             |             |   |             |             |             |   |             |             |            |   |             |             |             |   |             |             |             |   |             |             |             |   |             |             |             |   |             |             |             |   |             |             |             |                                                                                                                                                                                                                                                                                                                                                                                                                                                                                                                                                                                                                                                                                                                                                                                                                                                                                                                                                                                                                                                                                                                                                                                                                                                                                                                                                                                                                                                                                                                                                                                                                                                                                                                                                                           |            |             |             |            |            |             |             |            |            |            |            |             |            |             |             |             |            |             |             |             |            |             |             |            |            |             |             |            |            |             |            |            |            |             |             |            |            |            |            |            |            |            |            |                                                                                                                                                                                                                                                                                                                                                                                                                                                                                                                                                                                                                                                                                                                                                                                                                                                                                                                                                                                                                                                                                                                                                                                                                                                                                                                                                                                                                                                                                                                                                                                                                                                                                                                                                                                                                                                                                                                                                                                                                                                                                                                                                                                                                                                                                                                                                                                                                                                                                                                                                                                                                                                                            |   |            |             |             |   |            |             |             |   |            |             |            |   |            |             |            |   |            |             |            |   |            |             |             |   |             |             |             |   |             |             |             |   |             |             |             |   |             |             |             |                                                                                                                                                                                                                                                                                                                                                                                                                                                                                                                                                                                                                                                                                                                                                                                                                                                                                                                                                                                                                                                                                                                                                                                                                                                                                                                                                                                                                                                                                                                                                                                                                                                                                                                                                                            |            |             |             |            |            |             |             |            |            |             |             |             |            |            |            |             |            |             |             |             |            |             |             |            |             |             |             |            |             |             |             |            |             |            |            |            |             |            |            |            |            |            |             |             |             |             |             |             |             |             |             |             |             |             |             |            |             |             |             |            |             |             |             |            |             |             |             |            |             |             |             |             |             |             |             |             |             |             |            |             |             |             |             |             |             |             |             |                                                                                                                                                                                                                                                                                                                                                                                                                                                                                                                                                                                                                                                                                                                                                                                                                                                                                                                                                                                                                                                                                                                                                                                                                                                                                                                                                                                                                                                                                                                                                                                                                                                                                                                                                                                                                                                                                                                                                                                                                                                                                                                                                                                                                                                                                                                                                                                                                                                                                                                                                                                                                                                                         |   |            |             |            |   |            |            |            |   |            |             |            |   |            |            |            |   |            |            |            |   |            |            |             |   |            |            |             |   |            |             |             |   |            |            |             |   |            |             |            |   |            |             |            |   |            |             |             |   |            |             |             |   |            |             |            |   |            |             |            |   |            |             |             |   |             |            |            |   |             |            |            |   |             |            |             |   |             |            |             |   |            |            |            |   |             |             |            |   |             |            |            |   |             |             |             |   |             |             |            |   |             |            |            |   |             |             |             |   |             |             |             |   |             |             |             |   |             |            |            |   |             |             |             |   |             |             |             |
| C                 | -0.37132500                                                                                                                                                                                                                                                                                                                                                                                                                                                                                                                                                                                                                                                                                                                                                                                                                                                                                                                                                                                                                                                                                                                                                                                                                                                                                                                                                                                                                                                                                                                                                                                                                                                                                                                                                                                                                                                                                                                                                                                                                                                                                                                                                                                                                                                                                                                                                                                                                  | 2.02693300                                                                          | 0.08809600                                                                            |             |             |   |             |             |             |   |             |             |             |   |             |             |             |   |             |             |             |   |             |            |             |   |             |             |             |   |             |             |             |   |             |             |             |   |             |             |             |   |             |             |             |   |             |             |            |   |             |             |             |   |             |             |             |   |             |             |             |   |             |             |             |   |             |             |             |   |             |             |             |                                                                                                                                                                                                                                                                                                                                                                                                                                                                                                                                                                                                                                                                                                                                                                                                                                                                                                                                                                                                                                                                                                                                                                                                                                                                                                                                                                                                                                                                                                                                                                                                                                                                                                                                                                           |            |             |             |            |            |             |             |            |            |            |            |             |            |             |             |             |            |             |             |             |            |             |             |            |            |             |             |            |            |             |            |            |            |             |             |            |            |            |            |            |            |            |            |                                                                                                                                                                                                                                                                                                                                                                                                                                                                                                                                                                                                                                                                                                                                                                                                                                                                                                                                                                                                                                                                                                                                                                                                                                                                                                                                                                                                                                                                                                                                                                                                                                                                                                                                                                                                                                                                                                                                                                                                                                                                                                                                                                                                                                                                                                                                                                                                                                                                                                                                                                                                                                                                            |   |            |             |             |   |            |             |             |   |            |             |            |   |            |             |            |   |            |             |            |   |            |             |             |   |             |             |             |   |             |             |             |   |             |             |             |   |             |             |             |                                                                                                                                                                                                                                                                                                                                                                                                                                                                                                                                                                                                                                                                                                                                                                                                                                                                                                                                                                                                                                                                                                                                                                                                                                                                                                                                                                                                                                                                                                                                                                                                                                                                                                                                                                            |            |             |             |            |            |             |             |            |            |             |             |             |            |            |            |             |            |             |             |             |            |             |             |            |             |             |             |            |             |             |             |            |             |            |            |            |             |            |            |            |            |            |             |             |             |             |             |             |             |             |             |             |             |             |             |            |             |             |             |            |             |             |             |            |             |             |             |            |             |             |             |             |             |             |             |             |             |             |            |             |             |             |             |             |             |             |             |                                                                                                                                                                                                                                                                                                                                                                                                                                                                                                                                                                                                                                                                                                                                                                                                                                                                                                                                                                                                                                                                                                                                                                                                                                                                                                                                                                                                                                                                                                                                                                                                                                                                                                                                                                                                                                                                                                                                                                                                                                                                                                                                                                                                                                                                                                                                                                                                                                                                                                                                                                                                                                                                         |   |            |             |            |   |            |            |            |   |            |             |            |   |            |            |            |   |            |            |            |   |            |            |             |   |            |            |             |   |            |             |             |   |            |            |             |   |            |             |            |   |            |             |            |   |            |             |             |   |            |             |             |   |            |             |            |   |            |             |            |   |            |             |             |   |             |            |            |   |             |            |            |   |             |            |             |   |             |            |             |   |            |            |            |   |             |             |            |   |             |            |            |   |             |             |             |   |             |             |            |   |             |            |            |   |             |             |             |   |             |             |             |   |             |             |             |   |             |            |            |   |             |             |             |   |             |             |             |
| O                 | -0.88768200                                                                                                                                                                                                                                                                                                                                                                                                                                                                                                                                                                                                                                                                                                                                                                                                                                                                                                                                                                                                                                                                                                                                                                                                                                                                                                                                                                                                                                                                                                                                                                                                                                                                                                                                                                                                                                                                                                                                                                                                                                                                                                                                                                                                                                                                                                                                                                                                                  | 2.84183700                                                                          | 0.87431200                                                                            |             |             |   |             |             |             |   |             |             |             |   |             |             |             |   |             |             |             |   |             |            |             |   |             |             |             |   |             |             |             |   |             |             |             |   |             |             |             |   |             |             |             |   |             |             |            |   |             |             |             |   |             |             |             |   |             |             |             |   |             |             |             |   |             |             |             |   |             |             |             |                                                                                                                                                                                                                                                                                                                                                                                                                                                                                                                                                                                                                                                                                                                                                                                                                                                                                                                                                                                                                                                                                                                                                                                                                                                                                                                                                                                                                                                                                                                                                                                                                                                                                                                                                                           |            |             |             |            |            |             |             |            |            |            |            |             |            |             |             |             |            |             |             |             |            |             |             |            |            |             |             |            |            |             |            |            |            |             |             |            |            |            |            |            |            |            |            |                                                                                                                                                                                                                                                                                                                                                                                                                                                                                                                                                                                                                                                                                                                                                                                                                                                                                                                                                                                                                                                                                                                                                                                                                                                                                                                                                                                                                                                                                                                                                                                                                                                                                                                                                                                                                                                                                                                                                                                                                                                                                                                                                                                                                                                                                                                                                                                                                                                                                                                                                                                                                                                                            |   |            |             |             |   |            |             |             |   |            |             |            |   |            |             |            |   |            |             |            |   |            |             |             |   |             |             |             |   |             |             |             |   |             |             |             |   |             |             |             |                                                                                                                                                                                                                                                                                                                                                                                                                                                                                                                                                                                                                                                                                                                                                                                                                                                                                                                                                                                                                                                                                                                                                                                                                                                                                                                                                                                                                                                                                                                                                                                                                                                                                                                                                                            |            |             |             |            |            |             |             |            |            |             |             |             |            |            |            |             |            |             |             |             |            |             |             |            |             |             |             |            |             |             |             |            |             |            |            |            |             |            |            |            |            |            |             |             |             |             |             |             |             |             |             |             |             |             |             |            |             |             |             |            |             |             |             |            |             |             |             |            |             |             |             |             |             |             |             |             |             |             |            |             |             |             |             |             |             |             |             |                                                                                                                                                                                                                                                                                                                                                                                                                                                                                                                                                                                                                                                                                                                                                                                                                                                                                                                                                                                                                                                                                                                                                                                                                                                                                                                                                                                                                                                                                                                                                                                                                                                                                                                                                                                                                                                                                                                                                                                                                                                                                                                                                                                                                                                                                                                                                                                                                                                                                                                                                                                                                                                                         |   |            |             |            |   |            |            |            |   |            |             |            |   |            |            |            |   |            |            |            |   |            |            |             |   |            |            |             |   |            |             |             |   |            |            |             |   |            |             |            |   |            |             |            |   |            |             |             |   |            |             |             |   |            |             |            |   |            |             |            |   |            |             |             |   |             |            |            |   |             |            |            |   |             |            |             |   |             |            |             |   |            |            |            |   |             |             |            |   |             |            |            |   |             |             |             |   |             |             |            |   |             |            |            |   |             |             |             |   |             |             |             |   |             |             |             |   |             |            |            |   |             |             |             |   |             |             |             |
| O                 | 0.15623100                                                                                                                                                                                                                                                                                                                                                                                                                                                                                                                                                                                                                                                                                                                                                                                                                                                                                                                                                                                                                                                                                                                                                                                                                                                                                                                                                                                                                                                                                                                                                                                                                                                                                                                                                                                                                                                                                                                                                                                                                                                                                                                                                                                                                                                                                                                                                                                                                   | 2.25601200                                                                          | -1.01806300                                                                           |             |             |   |             |             |             |   |             |             |             |   |             |             |             |   |             |             |             |   |             |            |             |   |             |             |             |   |             |             |             |   |             |             |             |   |             |             |             |   |             |             |             |   |             |             |            |   |             |             |             |   |             |             |             |   |             |             |             |   |             |             |             |   |             |             |             |   |             |             |             |                                                                                                                                                                                                                                                                                                                                                                                                                                                                                                                                                                                                                                                                                                                                                                                                                                                                                                                                                                                                                                                                                                                                                                                                                                                                                                                                                                                                                                                                                                                                                                                                                                                                                                                                                                           |            |             |             |            |            |             |             |            |            |            |            |             |            |             |             |             |            |             |             |             |            |             |             |            |            |             |             |            |            |             |            |            |            |             |             |            |            |            |            |            |            |            |            |                                                                                                                                                                                                                                                                                                                                                                                                                                                                                                                                                                                                                                                                                                                                                                                                                                                                                                                                                                                                                                                                                                                                                                                                                                                                                                                                                                                                                                                                                                                                                                                                                                                                                                                                                                                                                                                                                                                                                                                                                                                                                                                                                                                                                                                                                                                                                                                                                                                                                                                                                                                                                                                                            |   |            |             |             |   |            |             |             |   |            |             |            |   |            |             |            |   |            |             |            |   |            |             |             |   |             |             |             |   |             |             |             |   |             |             |             |   |             |             |             |                                                                                                                                                                                                                                                                                                                                                                                                                                                                                                                                                                                                                                                                                                                                                                                                                                                                                                                                                                                                                                                                                                                                                                                                                                                                                                                                                                                                                                                                                                                                                                                                                                                                                                                                                                            |            |             |             |            |            |             |             |            |            |             |             |             |            |            |            |             |            |             |             |             |            |             |             |            |             |             |             |            |             |             |             |            |             |            |            |            |             |            |            |            |            |            |             |             |             |             |             |             |             |             |             |             |             |             |             |            |             |             |             |            |             |             |             |            |             |             |             |            |             |             |             |             |             |             |             |             |             |             |            |             |             |             |             |             |             |             |             |                                                                                                                                                                                                                                                                                                                                                                                                                                                                                                                                                                                                                                                                                                                                                                                                                                                                                                                                                                                                                                                                                                                                                                                                                                                                                                                                                                                                                                                                                                                                                                                                                                                                                                                                                                                                                                                                                                                                                                                                                                                                                                                                                                                                                                                                                                                                                                                                                                                                                                                                                                                                                                                                         |   |            |             |            |   |            |            |            |   |            |             |            |   |            |            |            |   |            |            |            |   |            |            |             |   |            |            |             |   |            |             |             |   |            |            |             |   |            |             |            |   |            |             |            |   |            |             |             |   |            |             |             |   |            |             |            |   |            |             |            |   |            |             |             |   |             |            |            |   |             |            |            |   |             |            |             |   |             |            |             |   |            |            |            |   |             |             |            |   |             |            |            |   |             |             |             |   |             |             |            |   |             |            |            |   |             |             |             |   |             |             |             |   |             |             |             |   |             |            |            |   |             |             |             |   |             |             |             |
| C                 | -1.79599000                                                                                                                                                                                                                                                                                                                                                                                                                                                                                                                                                                                                                                                                                                                                                                                                                                                                                                                                                                                                                                                                                                                                                                                                                                                                                                                                                                                                                                                                                                                                                                                                                                                                                                                                                                                                                                                                                                                                                                                                                                                                                                                                                                                                                                                                                                                                                                                                                  | -0.05709500                                                                         | 0.27020700                                                                            |             |             |   |             |             |             |   |             |             |             |   |             |             |             |   |             |             |             |   |             |            |             |   |             |             |             |   |             |             |             |   |             |             |             |   |             |             |             |   |             |             |             |   |             |             |            |   |             |             |             |   |             |             |             |   |             |             |             |   |             |             |             |   |             |             |             |   |             |             |             |                                                                                                                                                                                                                                                                                                                                                                                                                                                                                                                                                                                                                                                                                                                                                                                                                                                                                                                                                                                                                                                                                                                                                                                                                                                                                                                                                                                                                                                                                                                                                                                                                                                                                                                                                                           |            |             |             |            |            |             |             |            |            |            |            |             |            |             |             |             |            |             |             |             |            |             |             |            |            |             |             |            |            |             |            |            |            |             |             |            |            |            |            |            |            |            |            |                                                                                                                                                                                                                                                                                                                                                                                                                                                                                                                                                                                                                                                                                                                                                                                                                                                                                                                                                                                                                                                                                                                                                                                                                                                                                                                                                                                                                                                                                                                                                                                                                                                                                                                                                                                                                                                                                                                                                                                                                                                                                                                                                                                                                                                                                                                                                                                                                                                                                                                                                                                                                                                                            |   |            |             |             |   |            |             |             |   |            |             |            |   |            |             |            |   |            |             |            |   |            |             |             |   |             |             |             |   |             |             |             |   |             |             |             |   |             |             |             |                                                                                                                                                                                                                                                                                                                                                                                                                                                                                                                                                                                                                                                                                                                                                                                                                                                                                                                                                                                                                                                                                                                                                                                                                                                                                                                                                                                                                                                                                                                                                                                                                                                                                                                                                                            |            |             |             |            |            |             |             |            |            |             |             |             |            |            |            |             |            |             |             |             |            |             |             |            |             |             |             |            |             |             |             |            |             |            |            |            |             |            |            |            |            |            |             |             |             |             |             |             |             |             |             |             |             |             |             |            |             |             |             |            |             |             |             |            |             |             |             |            |             |             |             |             |             |             |             |             |             |             |            |             |             |             |             |             |             |             |             |                                                                                                                                                                                                                                                                                                                                                                                                                                                                                                                                                                                                                                                                                                                                                                                                                                                                                                                                                                                                                                                                                                                                                                                                                                                                                                                                                                                                                                                                                                                                                                                                                                                                                                                                                                                                                                                                                                                                                                                                                                                                                                                                                                                                                                                                                                                                                                                                                                                                                                                                                                                                                                                                         |   |            |             |            |   |            |            |            |   |            |             |            |   |            |            |            |   |            |            |            |   |            |            |             |   |            |            |             |   |            |             |             |   |            |            |             |   |            |             |            |   |            |             |            |   |            |             |             |   |            |             |             |   |            |             |            |   |            |             |            |   |            |             |             |   |             |            |            |   |             |            |            |   |             |            |             |   |             |            |             |   |            |            |            |   |             |             |            |   |             |            |            |   |             |             |             |   |             |             |            |   |             |            |            |   |             |             |             |   |             |             |             |   |             |             |             |   |             |            |            |   |             |             |             |   |             |             |             |
| C                 | -2.52369900                                                                                                                                                                                                                                                                                                                                                                                                                                                                                                                                                                                                                                                                                                                                                                                                                                                                                                                                                                                                                                                                                                                                                                                                                                                                                                                                                                                                                                                                                                                                                                                                                                                                                                                                                                                                                                                                                                                                                                                                                                                                                                                                                                                                                                                                                                                                                                                                                  | -0.65250600                                                                         | 1.29500700                                                                            |             |             |   |             |             |             |   |             |             |             |   |             |             |             |   |             |             |             |   |             |            |             |   |             |             |             |   |             |             |             |   |             |             |             |   |             |             |             |   |             |             |             |   |             |             |            |   |             |             |             |   |             |             |             |   |             |             |             |   |             |             |             |   |             |             |             |   |             |             |             |                                                                                                                                                                                                                                                                                                                                                                                                                                                                                                                                                                                                                                                                                                                                                                                                                                                                                                                                                                                                                                                                                                                                                                                                                                                                                                                                                                                                                                                                                                                                                                                                                                                                                                                                                                           |            |             |             |            |            |             |             |            |            |            |            |             |            |             |             |             |            |             |             |             |            |             |             |            |            |             |             |            |            |             |            |            |            |             |             |            |            |            |            |            |            |            |            |                                                                                                                                                                                                                                                                                                                                                                                                                                                                                                                                                                                                                                                                                                                                                                                                                                                                                                                                                                                                                                                                                                                                                                                                                                                                                                                                                                                                                                                                                                                                                                                                                                                                                                                                                                                                                                                                                                                                                                                                                                                                                                                                                                                                                                                                                                                                                                                                                                                                                                                                                                                                                                                                            |   |            |             |             |   |            |             |             |   |            |             |            |   |            |             |            |   |            |             |            |   |            |             |             |   |             |             |             |   |             |             |             |   |             |             |             |   |             |             |             |                                                                                                                                                                                                                                                                                                                                                                                                                                                                                                                                                                                                                                                                                                                                                                                                                                                                                                                                                                                                                                                                                                                                                                                                                                                                                                                                                                                                                                                                                                                                                                                                                                                                                                                                                                            |            |             |             |            |            |             |             |            |            |             |             |             |            |            |            |             |            |             |             |             |            |             |             |            |             |             |             |            |             |             |             |            |             |            |            |            |             |            |            |            |            |            |             |             |             |             |             |             |             |             |             |             |             |             |             |            |             |             |             |            |             |             |             |            |             |             |             |            |             |             |             |             |             |             |             |             |             |             |            |             |             |             |             |             |             |             |             |                                                                                                                                                                                                                                                                                                                                                                                                                                                                                                                                                                                                                                                                                                                                                                                                                                                                                                                                                                                                                                                                                                                                                                                                                                                                                                                                                                                                                                                                                                                                                                                                                                                                                                                                                                                                                                                                                                                                                                                                                                                                                                                                                                                                                                                                                                                                                                                                                                                                                                                                                                                                                                                                         |   |            |             |            |   |            |            |            |   |            |             |            |   |            |            |            |   |            |            |            |   |            |            |             |   |            |            |             |   |            |             |             |   |            |            |             |   |            |             |            |   |            |             |            |   |            |             |             |   |            |             |             |   |            |             |            |   |            |             |            |   |            |             |             |   |             |            |            |   |             |            |            |   |             |            |             |   |             |            |             |   |            |            |            |   |             |             |            |   |             |            |            |   |             |             |             |   |             |             |            |   |             |            |            |   |             |             |             |   |             |             |             |   |             |             |             |   |             |            |            |   |             |             |             |   |             |             |             |
| C                 | -2.36143200                                                                                                                                                                                                                                                                                                                                                                                                                                                                                                                                                                                                                                                                                                                                                                                                                                                                                                                                                                                                                                                                                                                                                                                                                                                                                                                                                                                                                                                                                                                                                                                                                                                                                                                                                                                                                                                                                                                                                                                                                                                                                                                                                                                                                                                                                                                                                                                                                  | -0.00306100                                                                         | -1.00237200                                                                           |             |             |   |             |             |             |   |             |             |             |   |             |             |             |   |             |             |             |   |             |            |             |   |             |             |             |   |             |             |             |   |             |             |             |   |             |             |             |   |             |             |             |   |             |             |            |   |             |             |             |   |             |             |             |   |             |             |             |   |             |             |             |   |             |             |             |   |             |             |             |                                                                                                                                                                                                                                                                                                                                                                                                                                                                                                                                                                                                                                                                                                                                                                                                                                                                                                                                                                                                                                                                                                                                                                                                                                                                                                                                                                                                                                                                                                                                                                                                                                                                                                                                                                           |            |             |             |            |            |             |             |            |            |            |            |             |            |             |             |             |            |             |             |             |            |             |             |            |            |             |             |            |            |             |            |            |            |             |             |            |            |            |            |            |            |            |            |                                                                                                                                                                                                                                                                                                                                                                                                                                                                                                                                                                                                                                                                                                                                                                                                                                                                                                                                                                                                                                                                                                                                                                                                                                                                                                                                                                                                                                                                                                                                                                                                                                                                                                                                                                                                                                                                                                                                                                                                                                                                                                                                                                                                                                                                                                                                                                                                                                                                                                                                                                                                                                                                            |   |            |             |             |   |            |             |             |   |            |             |            |   |            |             |            |   |            |             |            |   |            |             |             |   |             |             |             |   |             |             |             |   |             |             |             |   |             |             |             |                                                                                                                                                                                                                                                                                                                                                                                                                                                                                                                                                                                                                                                                                                                                                                                                                                                                                                                                                                                                                                                                                                                                                                                                                                                                                                                                                                                                                                                                                                                                                                                                                                                                                                                                                                            |            |             |             |            |            |             |             |            |            |             |             |             |            |            |            |             |            |             |             |             |            |             |             |            |             |             |             |            |             |             |             |            |             |            |            |            |             |            |            |            |            |            |             |             |             |             |             |             |             |             |             |             |             |             |             |            |             |             |             |            |             |             |             |            |             |             |             |            |             |             |             |             |             |             |             |             |             |             |            |             |             |             |             |             |             |             |             |                                                                                                                                                                                                                                                                                                                                                                                                                                                                                                                                                                                                                                                                                                                                                                                                                                                                                                                                                                                                                                                                                                                                                                                                                                                                                                                                                                                                                                                                                                                                                                                                                                                                                                                                                                                                                                                                                                                                                                                                                                                                                                                                                                                                                                                                                                                                                                                                                                                                                                                                                                                                                                                                         |   |            |             |            |   |            |            |            |   |            |             |            |   |            |            |            |   |            |            |            |   |            |            |             |   |            |            |             |   |            |             |             |   |            |            |             |   |            |             |            |   |            |             |            |   |            |             |             |   |            |             |             |   |            |             |            |   |            |             |            |   |            |             |             |   |             |            |            |   |             |            |            |   |             |            |             |   |             |            |             |   |            |            |            |   |             |             |            |   |             |            |            |   |             |             |             |   |             |             |            |   |             |            |            |   |             |             |             |   |             |             |             |   |             |             |             |   |             |            |            |   |             |             |             |   |             |             |             |
| C                 | -3.78498900                                                                                                                                                                                                                                                                                                                                                                                                                                                                                                                                                                                                                                                                                                                                                                                                                                                                                                                                                                                                                                                                                                                                                                                                                                                                                                                                                                                                                                                                                                                                                                                                                                                                                                                                                                                                                                                                                                                                                                                                                                                                                                                                                                                                                                                                                                                                                                                                                  | -1.18433200                                                                         | 1.05973700                                                                            |             |             |   |             |             |             |   |             |             |             |   |             |             |             |   |             |             |             |   |             |            |             |   |             |             |             |   |             |             |             |   |             |             |             |   |             |             |             |   |             |             |             |   |             |             |            |   |             |             |             |   |             |             |             |   |             |             |             |   |             |             |             |   |             |             |             |   |             |             |             |                                                                                                                                                                                                                                                                                                                                                                                                                                                                                                                                                                                                                                                                                                                                                                                                                                                                                                                                                                                                                                                                                                                                                                                                                                                                                                                                                                                                                                                                                                                                                                                                                                                                                                                                                                           |            |             |             |            |            |             |             |            |            |            |            |             |            |             |             |             |            |             |             |             |            |             |             |            |            |             |             |            |            |             |            |            |            |             |             |            |            |            |            |            |            |            |            |                                                                                                                                                                                                                                                                                                                                                                                                                                                                                                                                                                                                                                                                                                                                                                                                                                                                                                                                                                                                                                                                                                                                                                                                                                                                                                                                                                                                                                                                                                                                                                                                                                                                                                                                                                                                                                                                                                                                                                                                                                                                                                                                                                                                                                                                                                                                                                                                                                                                                                                                                                                                                                                                            |   |            |             |             |   |            |             |             |   |            |             |            |   |            |             |            |   |            |             |            |   |            |             |             |   |             |             |             |   |             |             |             |   |             |             |             |   |             |             |             |                                                                                                                                                                                                                                                                                                                                                                                                                                                                                                                                                                                                                                                                                                                                                                                                                                                                                                                                                                                                                                                                                                                                                                                                                                                                                                                                                                                                                                                                                                                                                                                                                                                                                                                                                                            |            |             |             |            |            |             |             |            |            |             |             |             |            |            |            |             |            |             |             |             |            |             |             |            |             |             |             |            |             |             |             |            |             |            |            |            |             |            |            |            |            |            |             |             |             |             |             |             |             |             |             |             |             |             |             |            |             |             |             |            |             |             |             |            |             |             |             |            |             |             |             |             |             |             |             |             |             |             |            |             |             |             |             |             |             |             |             |                                                                                                                                                                                                                                                                                                                                                                                                                                                                                                                                                                                                                                                                                                                                                                                                                                                                                                                                                                                                                                                                                                                                                                                                                                                                                                                                                                                                                                                                                                                                                                                                                                                                                                                                                                                                                                                                                                                                                                                                                                                                                                                                                                                                                                                                                                                                                                                                                                                                                                                                                                                                                                                                         |   |            |             |            |   |            |            |            |   |            |             |            |   |            |            |            |   |            |            |            |   |            |            |             |   |            |            |             |   |            |             |             |   |            |            |             |   |            |             |            |   |            |             |            |   |            |             |             |   |            |             |             |   |            |             |            |   |            |             |            |   |            |             |             |   |             |            |            |   |             |            |            |   |             |            |             |   |             |            |             |   |            |            |            |   |             |             |            |   |             |            |            |   |             |             |             |   |             |             |            |   |             |            |            |   |             |             |             |   |             |             |             |   |             |             |             |   |             |            |            |   |             |             |             |   |             |             |             |
| O                 | -2.09928500                                                                                                                                                                                                                                                                                                                                                                                                                                                                                                                                                                                                                                                                                                                                                                                                                                                                                                                                                                                                                                                                                                                                                                                                                                                                                                                                                                                                                                                                                                                                                                                                                                                                                                                                                                                                                                                                                                                                                                                                                                                                                                                                                                                                                                                                                                                                                                                                                  | -0.70042300                                                                         | 2.29133100                                                                            |             |             |   |             |             |             |   |             |             |             |   |             |             |             |   |             |             |             |   |             |            |             |   |             |             |             |   |             |             |             |   |             |             |             |   |             |             |             |   |             |             |             |   |             |             |            |   |             |             |             |   |             |             |             |   |             |             |             |   |             |             |             |   |             |             |             |   |             |             |             |                                                                                                                                                                                                                                                                                                                                                                                                                                                                                                                                                                                                                                                                                                                                                                                                                                                                                                                                                                                                                                                                                                                                                                                                                                                                                                                                                                                                                                                                                                                                                                                                                                                                                                                                                                           |            |             |             |            |            |             |             |            |            |            |            |             |            |             |             |             |            |             |             |             |            |             |             |            |            |             |             |            |            |             |            |            |            |             |             |            |            |            |            |            |            |            |            |                                                                                                                                                                                                                                                                                                                                                                                                                                                                                                                                                                                                                                                                                                                                                                                                                                                                                                                                                                                                                                                                                                                                                                                                                                                                                                                                                                                                                                                                                                                                                                                                                                                                                                                                                                                                                                                                                                                                                                                                                                                                                                                                                                                                                                                                                                                                                                                                                                                                                                                                                                                                                                                                            |   |            |             |             |   |            |             |             |   |            |             |            |   |            |             |            |   |            |             |            |   |            |             |             |   |             |             |             |   |             |             |             |   |             |             |             |   |             |             |             |                                                                                                                                                                                                                                                                                                                                                                                                                                                                                                                                                                                                                                                                                                                                                                                                                                                                                                                                                                                                                                                                                                                                                                                                                                                                                                                                                                                                                                                                                                                                                                                                                                                                                                                                                                            |            |             |             |            |            |             |             |            |            |             |             |             |            |            |            |             |            |             |             |             |            |             |             |            |             |             |             |            |             |             |             |            |             |            |            |            |             |            |            |            |            |            |             |             |             |             |             |             |             |             |             |             |             |             |             |            |             |             |             |            |             |             |             |            |             |             |             |            |             |             |             |             |             |             |             |             |             |             |            |             |             |             |             |             |             |             |             |                                                                                                                                                                                                                                                                                                                                                                                                                                                                                                                                                                                                                                                                                                                                                                                                                                                                                                                                                                                                                                                                                                                                                                                                                                                                                                                                                                                                                                                                                                                                                                                                                                                                                                                                                                                                                                                                                                                                                                                                                                                                                                                                                                                                                                                                                                                                                                                                                                                                                                                                                                                                                                                                         |   |            |             |            |   |            |            |            |   |            |             |            |   |            |            |            |   |            |            |            |   |            |            |             |   |            |            |             |   |            |             |             |   |            |            |             |   |            |             |            |   |            |             |            |   |            |             |             |   |            |             |             |   |            |             |            |   |            |             |            |   |            |             |             |   |             |            |            |   |             |            |            |   |             |            |             |   |             |            |             |   |            |            |            |   |             |             |            |   |             |            |            |   |             |             |             |   |             |             |            |   |             |            |            |   |             |             |             |   |             |             |             |   |             |             |             |   |             |            |            |   |             |             |             |   |             |             |             |
| C                 | -3.61903700                                                                                                                                                                                                                                                                                                                                                                                                                                                                                                                                                                                                                                                                                                                                                                                                                                                                                                                                                                                                                                                                                                                                                                                                                                                                                                                                                                                                                                                                                                                                                                                                                                                                                                                                                                                                                                                                                                                                                                                                                                                                                                                                                                                                                                                                                                                                                                                                                  | -0.53328400                                                                         | -1.24138600                                                                           |             |             |   |             |             |             |   |             |             |             |   |             |             |             |   |             |             |             |   |             |            |             |   |             |             |             |   |             |             |             |   |             |             |             |   |             |             |             |   |             |             |             |   |             |             |            |   |             |             |             |   |             |             |             |   |             |             |             |   |             |             |             |   |             |             |             |   |             |             |             |                                                                                                                                                                                                                                                                                                                                                                                                                                                                                                                                                                                                                                                                                                                                                                                                                                                                                                                                                                                                                                                                                                                                                                                                                                                                                                                                                                                                                                                                                                                                                                                                                                                                                                                                                                           |            |             |             |            |            |             |             |            |            |            |            |             |            |             |             |             |            |             |             |             |            |             |             |            |            |             |             |            |            |             |            |            |            |             |             |            |            |            |            |            |            |            |            |                                                                                                                                                                                                                                                                                                                                                                                                                                                                                                                                                                                                                                                                                                                                                                                                                                                                                                                                                                                                                                                                                                                                                                                                                                                                                                                                                                                                                                                                                                                                                                                                                                                                                                                                                                                                                                                                                                                                                                                                                                                                                                                                                                                                                                                                                                                                                                                                                                                                                                                                                                                                                                                                            |   |            |             |             |   |            |             |             |   |            |             |            |   |            |             |            |   |            |             |            |   |            |             |             |   |             |             |             |   |             |             |             |   |             |             |             |   |             |             |             |                                                                                                                                                                                                                                                                                                                                                                                                                                                                                                                                                                                                                                                                                                                                                                                                                                                                                                                                                                                                                                                                                                                                                                                                                                                                                                                                                                                                                                                                                                                                                                                                                                                                                                                                                                            |            |             |             |            |            |             |             |            |            |             |             |             |            |            |            |             |            |             |             |             |            |             |             |            |             |             |             |            |             |             |             |            |             |            |            |            |             |            |            |            |            |            |             |             |             |             |             |             |             |             |             |             |             |             |             |            |             |             |             |            |             |             |             |            |             |             |             |            |             |             |             |             |             |             |             |             |             |             |            |             |             |             |             |             |             |             |             |                                                                                                                                                                                                                                                                                                                                                                                                                                                                                                                                                                                                                                                                                                                                                                                                                                                                                                                                                                                                                                                                                                                                                                                                                                                                                                                                                                                                                                                                                                                                                                                                                                                                                                                                                                                                                                                                                                                                                                                                                                                                                                                                                                                                                                                                                                                                                                                                                                                                                                                                                                                                                                                                         |   |            |             |            |   |            |            |            |   |            |             |            |   |            |            |            |   |            |            |            |   |            |            |             |   |            |            |             |   |            |             |             |   |            |            |             |   |            |             |            |   |            |             |            |   |            |             |             |   |            |             |             |   |            |             |            |   |            |             |            |   |            |             |             |   |             |            |            |   |             |            |            |   |             |            |             |   |             |            |             |   |            |            |            |   |             |             |            |   |             |            |            |   |             |             |             |   |             |             |            |   |             |            |            |   |             |             |             |   |             |             |             |   |             |             |             |   |             |            |            |   |             |             |             |   |             |             |             |
| H                 | -1.80726800                                                                                                                                                                                                                                                                                                                                                                                                                                                                                                                                                                                                                                                                                                                                                                                                                                                                                                                                                                                                                                                                                                                                                                                                                                                                                                                                                                                                                                                                                                                                                                                                                                                                                                                                                                                                                                                                                                                                                                                                                                                                                                                                                                                                                                                                                                                                                                                                                  | 0.46419600                                                                          | -1.80629700                                                                           |             |             |   |             |             |             |   |             |             |             |   |             |             |             |   |             |             |             |   |             |            |             |   |             |             |             |   |             |             |             |   |             |             |             |   |             |             |             |   |             |             |             |   |             |             |            |   |             |             |             |   |             |             |             |   |             |             |             |   |             |             |             |   |             |             |             |   |             |             |             |                                                                                                                                                                                                                                                                                                                                                                                                                                                                                                                                                                                                                                                                                                                                                                                                                                                                                                                                                                                                                                                                                                                                                                                                                                                                                                                                                                                                                                                                                                                                                                                                                                                                                                                                                                           |            |             |             |            |            |             |             |            |            |            |            |             |            |             |             |             |            |             |             |             |            |             |             |            |            |             |             |            |            |             |            |            |            |             |             |            |            |            |            |            |            |            |            |                                                                                                                                                                                                                                                                                                                                                                                                                                                                                                                                                                                                                                                                                                                                                                                                                                                                                                                                                                                                                                                                                                                                                                                                                                                                                                                                                                                                                                                                                                                                                                                                                                                                                                                                                                                                                                                                                                                                                                                                                                                                                                                                                                                                                                                                                                                                                                                                                                                                                                                                                                                                                                                                            |   |            |             |             |   |            |             |             |   |            |             |            |   |            |             |            |   |            |             |            |   |            |             |             |   |             |             |             |   |             |             |             |   |             |             |             |   |             |             |             |                                                                                                                                                                                                                                                                                                                                                                                                                                                                                                                                                                                                                                                                                                                                                                                                                                                                                                                                                                                                                                                                                                                                                                                                                                                                                                                                                                                                                                                                                                                                                                                                                                                                                                                                                                            |            |             |             |            |            |             |             |            |            |             |             |             |            |            |            |             |            |             |             |             |            |             |             |            |             |             |             |            |             |             |             |            |             |            |            |            |             |            |            |            |            |            |             |             |             |             |             |             |             |             |             |             |             |             |             |            |             |             |             |            |             |             |             |            |             |             |             |            |             |             |             |             |             |             |             |             |             |             |            |             |             |             |             |             |             |             |             |                                                                                                                                                                                                                                                                                                                                                                                                                                                                                                                                                                                                                                                                                                                                                                                                                                                                                                                                                                                                                                                                                                                                                                                                                                                                                                                                                                                                                                                                                                                                                                                                                                                                                                                                                                                                                                                                                                                                                                                                                                                                                                                                                                                                                                                                                                                                                                                                                                                                                                                                                                                                                                                                         |   |            |             |            |   |            |            |            |   |            |             |            |   |            |            |            |   |            |            |            |   |            |            |             |   |            |            |             |   |            |             |             |   |            |            |             |   |            |             |            |   |            |             |            |   |            |             |             |   |            |             |             |   |            |             |            |   |            |             |            |   |            |             |             |   |             |            |            |   |             |            |            |   |             |            |             |   |             |            |             |   |            |            |            |   |             |             |            |   |             |            |            |   |             |             |             |   |             |             |            |   |             |            |            |   |             |             |             |   |             |             |             |   |             |             |             |   |             |            |            |   |             |             |             |   |             |             |             |
| C                 | -4.33649500                                                                                                                                                                                                                                                                                                                                                                                                                                                                                                                                                                                                                                                                                                                                                                                                                                                                                                                                                                                                                                                                                                                                                                                                                                                                                                                                                                                                                                                                                                                                                                                                                                                                                                                                                                                                                                                                                                                                                                                                                                                                                                                                                                                                                                                                                                                                                                                                                  | -1.12769700                                                                         | -0.21074700                                                                           |             |             |   |             |             |             |   |             |             |             |   |             |             |             |   |             |             |             |   |             |            |             |   |             |             |             |   |             |             |             |   |             |             |             |   |             |             |             |   |             |             |             |   |             |             |            |   |             |             |             |   |             |             |             |   |             |             |             |   |             |             |             |   |             |             |             |   |             |             |             |                                                                                                                                                                                                                                                                                                                                                                                                                                                                                                                                                                                                                                                                                                                                                                                                                                                                                                                                                                                                                                                                                                                                                                                                                                                                                                                                                                                                                                                                                                                                                                                                                                                                                                                                                                           |            |             |             |            |            |             |             |            |            |            |            |             |            |             |             |             |            |             |             |             |            |             |             |            |            |             |             |            |            |             |            |            |            |             |             |            |            |            |            |            |            |            |            |                                                                                                                                                                                                                                                                                                                                                                                                                                                                                                                                                                                                                                                                                                                                                                                                                                                                                                                                                                                                                                                                                                                                                                                                                                                                                                                                                                                                                                                                                                                                                                                                                                                                                                                                                                                                                                                                                                                                                                                                                                                                                                                                                                                                                                                                                                                                                                                                                                                                                                                                                                                                                                                                            |   |            |             |             |   |            |             |             |   |            |             |            |   |            |             |            |   |            |             |            |   |            |             |             |   |             |             |             |   |             |             |             |   |             |             |             |   |             |             |             |                                                                                                                                                                                                                                                                                                                                                                                                                                                                                                                                                                                                                                                                                                                                                                                                                                                                                                                                                                                                                                                                                                                                                                                                                                                                                                                                                                                                                                                                                                                                                                                                                                                                                                                                                                            |            |             |             |            |            |             |             |            |            |             |             |             |            |            |            |             |            |             |             |             |            |             |             |            |             |             |             |            |             |             |             |            |             |            |            |            |             |            |            |            |            |            |             |             |             |             |             |             |             |             |             |             |             |             |             |            |             |             |             |            |             |             |             |            |             |             |             |            |             |             |             |             |             |             |             |             |             |             |            |             |             |             |             |             |             |             |             |                                                                                                                                                                                                                                                                                                                                                                                                                                                                                                                                                                                                                                                                                                                                                                                                                                                                                                                                                                                                                                                                                                                                                                                                                                                                                                                                                                                                                                                                                                                                                                                                                                                                                                                                                                                                                                                                                                                                                                                                                                                                                                                                                                                                                                                                                                                                                                                                                                                                                                                                                                                                                                                                         |   |            |             |            |   |            |            |            |   |            |             |            |   |            |            |            |   |            |            |            |   |            |            |             |   |            |            |             |   |            |             |             |   |            |            |             |   |            |             |            |   |            |             |            |   |            |             |             |   |            |             |             |   |            |             |            |   |            |             |            |   |            |             |             |   |             |            |            |   |             |            |            |   |             |            |             |   |             |            |             |   |            |            |            |   |             |             |            |   |             |            |            |   |             |             |             |   |             |             |            |   |             |            |            |   |             |             |             |   |             |             |             |   |             |             |             |   |             |            |            |   |             |             |             |   |             |             |             |
| H                 | -4.33546900                                                                                                                                                                                                                                                                                                                                                                                                                                                                                                                                                                                                                                                                                                                                                                                                                                                                                                                                                                                                                                                                                                                                                                                                                                                                                                                                                                                                                                                                                                                                                                                                                                                                                                                                                                                                                                                                                                                                                                                                                                                                                                                                                                                                                                                                                                                                                                                                                  | -1.64257100                                                                         | 1.87214800                                                                            |             |             |   |             |             |             |   |             |             |             |   |             |             |             |   |             |             |             |   |             |            |             |   |             |             |             |   |             |             |             |   |             |             |             |   |             |             |             |   |             |             |             |   |             |             |            |   |             |             |             |   |             |             |             |   |             |             |             |   |             |             |             |   |             |             |             |   |             |             |             |                                                                                                                                                                                                                                                                                                                                                                                                                                                                                                                                                                                                                                                                                                                                                                                                                                                                                                                                                                                                                                                                                                                                                                                                                                                                                                                                                                                                                                                                                                                                                                                                                                                                                                                                                                           |            |             |             |            |            |             |             |            |            |            |            |             |            |             |             |             |            |             |             |             |            |             |             |            |            |             |             |            |            |             |            |            |            |             |             |            |            |            |            |            |            |            |            |                                                                                                                                                                                                                                                                                                                                                                                                                                                                                                                                                                                                                                                                                                                                                                                                                                                                                                                                                                                                                                                                                                                                                                                                                                                                                                                                                                                                                                                                                                                                                                                                                                                                                                                                                                                                                                                                                                                                                                                                                                                                                                                                                                                                                                                                                                                                                                                                                                                                                                                                                                                                                                                                            |   |            |             |             |   |            |             |             |   |            |             |            |   |            |             |            |   |            |             |            |   |            |             |             |   |             |             |             |   |             |             |             |   |             |             |             |   |             |             |             |                                                                                                                                                                                                                                                                                                                                                                                                                                                                                                                                                                                                                                                                                                                                                                                                                                                                                                                                                                                                                                                                                                                                                                                                                                                                                                                                                                                                                                                                                                                                                                                                                                                                                                                                                                            |            |             |             |            |            |             |             |            |            |             |             |             |            |            |            |             |            |             |             |             |            |             |             |            |             |             |             |            |             |             |             |            |             |            |            |            |             |            |            |            |            |            |             |             |             |             |             |             |             |             |             |             |             |             |             |            |             |             |             |            |             |             |             |            |             |             |             |            |             |             |             |             |             |             |             |             |             |             |            |             |             |             |             |             |             |             |             |                                                                                                                                                                                                                                                                                                                                                                                                                                                                                                                                                                                                                                                                                                                                                                                                                                                                                                                                                                                                                                                                                                                                                                                                                                                                                                                                                                                                                                                                                                                                                                                                                                                                                                                                                                                                                                                                                                                                                                                                                                                                                                                                                                                                                                                                                                                                                                                                                                                                                                                                                                                                                                                                         |   |            |             |            |   |            |            |            |   |            |             |            |   |            |            |            |   |            |            |            |   |            |            |             |   |            |            |             |   |            |             |             |   |            |            |             |   |            |             |            |   |            |             |            |   |            |             |             |   |            |             |             |   |            |             |            |   |            |             |            |   |            |             |             |   |             |            |            |   |             |            |            |   |             |            |             |   |             |            |             |   |            |            |            |   |             |             |            |   |             |            |            |   |             |             |             |   |             |             |            |   |             |            |            |   |             |             |             |   |             |             |             |   |             |             |             |   |             |            |            |   |             |             |             |   |             |             |             |
| H                 | -4.04333900                                                                                                                                                                                                                                                                                                                                                                                                                                                                                                                                                                                                                                                                                                                                                                                                                                                                                                                                                                                                                                                                                                                                                                                                                                                                                                                                                                                                                                                                                                                                                                                                                                                                                                                                                                                                                                                                                                                                                                                                                                                                                                                                                                                                                                                                                                                                                                                                                  | -0.48154600                                                                         | -2.23663900                                                                           |             |             |   |             |             |             |   |             |             |             |   |             |             |             |   |             |             |             |   |             |            |             |   |             |             |             |   |             |             |             |   |             |             |             |   |             |             |             |   |             |             |             |   |             |             |            |   |             |             |             |   |             |             |             |   |             |             |             |   |             |             |             |   |             |             |             |   |             |             |             |                                                                                                                                                                                                                                                                                                                                                                                                                                                                                                                                                                                                                                                                                                                                                                                                                                                                                                                                                                                                                                                                                                                                                                                                                                                                                                                                                                                                                                                                                                                                                                                                                                                                                                                                                                           |            |             |             |            |            |             |             |            |            |            |            |             |            |             |             |             |            |             |             |             |            |             |             |            |            |             |             |            |            |             |            |            |            |             |             |            |            |            |            |            |            |            |            |                                                                                                                                                                                                                                                                                                                                                                                                                                                                                                                                                                                                                                                                                                                                                                                                                                                                                                                                                                                                                                                                                                                                                                                                                                                                                                                                                                                                                                                                                                                                                                                                                                                                                                                                                                                                                                                                                                                                                                                                                                                                                                                                                                                                                                                                                                                                                                                                                                                                                                                                                                                                                                                                            |   |            |             |             |   |            |             |             |   |            |             |            |   |            |             |            |   |            |             |            |   |            |             |             |   |             |             |             |   |             |             |             |   |             |             |             |   |             |             |             |                                                                                                                                                                                                                                                                                                                                                                                                                                                                                                                                                                                                                                                                                                                                                                                                                                                                                                                                                                                                                                                                                                                                                                                                                                                                                                                                                                                                                                                                                                                                                                                                                                                                                                                                                                            |            |             |             |            |            |             |             |            |            |             |             |             |            |            |            |             |            |             |             |             |            |             |             |            |             |             |             |            |             |             |             |            |             |            |            |            |             |            |            |            |            |            |             |             |             |             |             |             |             |             |             |             |             |             |             |            |             |             |             |            |             |             |             |            |             |             |             |            |             |             |             |             |             |             |             |             |             |             |            |             |             |             |             |             |             |             |             |                                                                                                                                                                                                                                                                                                                                                                                                                                                                                                                                                                                                                                                                                                                                                                                                                                                                                                                                                                                                                                                                                                                                                                                                                                                                                                                                                                                                                                                                                                                                                                                                                                                                                                                                                                                                                                                                                                                                                                                                                                                                                                                                                                                                                                                                                                                                                                                                                                                                                                                                                                                                                                                                         |   |            |             |            |   |            |            |            |   |            |             |            |   |            |            |            |   |            |            |            |   |            |            |             |   |            |            |             |   |            |             |             |   |            |            |             |   |            |             |            |   |            |             |            |   |            |             |             |   |            |             |             |   |            |             |            |   |            |             |            |   |            |             |             |   |             |            |            |   |             |            |            |   |             |            |             |   |             |            |             |   |            |            |            |   |             |             |            |   |             |            |            |   |             |             |             |   |             |             |            |   |             |            |            |   |             |             |             |   |             |             |             |   |             |             |             |   |             |            |            |   |             |             |             |   |             |             |             |
| H                 | -5.31963300                                                                                                                                                                                                                                                                                                                                                                                                                                                                                                                                                                                                                                                                                                                                                                                                                                                                                                                                                                                                                                                                                                                                                                                                                                                                                                                                                                                                                                                                                                                                                                                                                                                                                                                                                                                                                                                                                                                                                                                                                                                                                                                                                                                                                                                                                                                                                                                                                  | -1.54104900                                                                         | -0.39810100                                                                           |             |             |   |             |             |             |   |             |             |             |   |             |             |             |   |             |             |             |   |             |            |             |   |             |             |             |   |             |             |             |   |             |             |             |   |             |             |             |   |             |             |             |   |             |             |            |   |             |             |             |   |             |             |             |   |             |             |             |   |             |             |             |   |             |             |             |   |             |             |             |                                                                                                                                                                                                                                                                                                                                                                                                                                                                                                                                                                                                                                                                                                                                                                                                                                                                                                                                                                                                                                                                                                                                                                                                                                                                                                                                                                                                                                                                                                                                                                                                                                                                                                                                                                           |            |             |             |            |            |             |             |            |            |            |            |             |            |             |             |             |            |             |             |             |            |             |             |            |            |             |             |            |            |             |            |            |            |             |             |            |            |            |            |            |            |            |            |                                                                                                                                                                                                                                                                                                                                                                                                                                                                                                                                                                                                                                                                                                                                                                                                                                                                                                                                                                                                                                                                                                                                                                                                                                                                                                                                                                                                                                                                                                                                                                                                                                                                                                                                                                                                                                                                                                                                                                                                                                                                                                                                                                                                                                                                                                                                                                                                                                                                                                                                                                                                                                                                            |   |            |             |             |   |            |             |             |   |            |             |            |   |            |             |            |   |            |             |            |   |            |             |             |   |             |             |             |   |             |             |             |   |             |             |             |   |             |             |             |                                                                                                                                                                                                                                                                                                                                                                                                                                                                                                                                                                                                                                                                                                                                                                                                                                                                                                                                                                                                                                                                                                                                                                                                                                                                                                                                                                                                                                                                                                                                                                                                                                                                                                                                                                            |            |             |             |            |            |             |             |            |            |             |             |             |            |            |            |             |            |             |             |             |            |             |             |            |             |             |             |            |             |             |             |            |             |            |            |            |             |            |            |            |            |            |             |             |             |             |             |             |             |             |             |             |             |             |             |            |             |             |             |            |             |             |             |            |             |             |             |            |             |             |             |             |             |             |             |             |             |             |            |             |             |             |             |             |             |             |             |                                                                                                                                                                                                                                                                                                                                                                                                                                                                                                                                                                                                                                                                                                                                                                                                                                                                                                                                                                                                                                                                                                                                                                                                                                                                                                                                                                                                                                                                                                                                                                                                                                                                                                                                                                                                                                                                                                                                                                                                                                                                                                                                                                                                                                                                                                                                                                                                                                                                                                                                                                                                                                                                         |   |            |             |            |   |            |            |            |   |            |             |            |   |            |            |            |   |            |            |            |   |            |            |             |   |            |            |             |   |            |             |             |   |            |            |             |   |            |             |            |   |            |             |            |   |            |             |             |   |            |             |             |   |            |             |            |   |            |             |            |   |            |             |             |   |             |            |            |   |             |            |            |   |             |            |             |   |             |            |             |   |            |            |            |   |             |             |            |   |             |            |            |   |             |             |             |   |             |             |            |   |             |            |            |   |             |             |             |   |             |             |             |   |             |             |             |   |             |            |            |   |             |             |             |   |             |             |             |
| C                 | 3.12664900                                                                                                                                                                                                                                                                                                                                                                                                                                                                                                                                                                                                                                                                                                                                                                                                                                                                                                                                                                                                                                                                                                                                                                                                                                                                                                                                                                                                                                                                                                                                                                                                                                                                                                                                                                                                                                                                                                                                                                                                                                                                                                                                                                                                                                                                                                                                                                                                                   | -0.43933200                                                                         | 0.18775700                                                                            |             |             |   |             |             |             |   |             |             |             |   |             |             |             |   |             |             |             |   |             |            |             |   |             |             |             |   |             |             |             |   |             |             |             |   |             |             |             |   |             |             |             |   |             |             |            |   |             |             |             |   |             |             |             |   |             |             |             |   |             |             |             |   |             |             |             |   |             |             |             |                                                                                                                                                                                                                                                                                                                                                                                                                                                                                                                                                                                                                                                                                                                                                                                                                                                                                                                                                                                                                                                                                                                                                                                                                                                                                                                                                                                                                                                                                                                                                                                                                                                                                                                                                                           |            |             |             |            |            |             |             |            |            |            |            |             |            |             |             |             |            |             |             |             |            |             |             |            |            |             |             |            |            |             |            |            |            |             |             |            |            |            |            |            |            |            |            |                                                                                                                                                                                                                                                                                                                                                                                                                                                                                                                                                                                                                                                                                                                                                                                                                                                                                                                                                                                                                                                                                                                                                                                                                                                                                                                                                                                                                                                                                                                                                                                                                                                                                                                                                                                                                                                                                                                                                                                                                                                                                                                                                                                                                                                                                                                                                                                                                                                                                                                                                                                                                                                                            |   |            |             |             |   |            |             |             |   |            |             |            |   |            |             |            |   |            |             |            |   |            |             |             |   |             |             |             |   |             |             |             |   |             |             |             |   |             |             |             |                                                                                                                                                                                                                                                                                                                                                                                                                                                                                                                                                                                                                                                                                                                                                                                                                                                                                                                                                                                                                                                                                                                                                                                                                                                                                                                                                                                                                                                                                                                                                                                                                                                                                                                                                                            |            |             |             |            |            |             |             |            |            |             |             |             |            |            |            |             |            |             |             |             |            |             |             |            |             |             |             |            |             |             |             |            |             |            |            |            |             |            |            |            |            |            |             |             |             |             |             |             |             |             |             |             |             |             |             |            |             |             |             |            |             |             |             |            |             |             |             |            |             |             |             |             |             |             |             |             |             |             |            |             |             |             |             |             |             |             |             |                                                                                                                                                                                                                                                                                                                                                                                                                                                                                                                                                                                                                                                                                                                                                                                                                                                                                                                                                                                                                                                                                                                                                                                                                                                                                                                                                                                                                                                                                                                                                                                                                                                                                                                                                                                                                                                                                                                                                                                                                                                                                                                                                                                                                                                                                                                                                                                                                                                                                                                                                                                                                                                                         |   |            |             |            |   |            |            |            |   |            |             |            |   |            |            |            |   |            |            |            |   |            |            |             |   |            |            |             |   |            |             |             |   |            |            |             |   |            |             |            |   |            |             |            |   |            |             |             |   |            |             |             |   |            |             |            |   |            |             |            |   |            |             |             |   |             |            |            |   |             |            |            |   |             |            |             |   |             |            |             |   |            |            |            |   |             |             |            |   |             |            |            |   |             |             |             |   |             |             |            |   |             |            |            |   |             |             |             |   |             |             |             |   |             |             |             |   |             |            |            |   |             |             |             |   |             |             |             |
| C                 | 4.06398400                                                                                                                                                                                                                                                                                                                                                                                                                                                                                                                                                                                                                                                                                                                                                                                                                                                                                                                                                                                                                                                                                                                                                                                                                                                                                                                                                                                                                                                                                                                                                                                                                                                                                                                                                                                                                                                                                                                                                                                                                                                                                                                                                                                                                                                                                                                                                                                                                   | 0.17023200                                                                          | 1.22471000                                                                            |             |             |   |             |             |             |   |             |             |             |   |             |             |             |   |             |             |             |   |             |            |             |   |             |             |             |   |             |             |             |   |             |             |             |   |             |             |             |   |             |             |             |   |             |             |            |   |             |             |             |   |             |             |             |   |             |             |             |   |             |             |             |   |             |             |             |   |             |             |             |                                                                                                                                                                                                                                                                                                                                                                                                                                                                                                                                                                                                                                                                                                                                                                                                                                                                                                                                                                                                                                                                                                                                                                                                                                                                                                                                                                                                                                                                                                                                                                                                                                                                                                                                                                           |            |             |             |            |            |             |             |            |            |            |            |             |            |             |             |             |            |             |             |             |            |             |             |            |            |             |             |            |            |             |            |            |            |             |             |            |            |            |            |            |            |            |            |                                                                                                                                                                                                                                                                                                                                                                                                                                                                                                                                                                                                                                                                                                                                                                                                                                                                                                                                                                                                                                                                                                                                                                                                                                                                                                                                                                                                                                                                                                                                                                                                                                                                                                                                                                                                                                                                                                                                                                                                                                                                                                                                                                                                                                                                                                                                                                                                                                                                                                                                                                                                                                                                            |   |            |             |             |   |            |             |             |   |            |             |            |   |            |             |            |   |            |             |            |   |            |             |             |   |             |             |             |   |             |             |             |   |             |             |             |   |             |             |             |                                                                                                                                                                                                                                                                                                                                                                                                                                                                                                                                                                                                                                                                                                                                                                                                                                                                                                                                                                                                                                                                                                                                                                                                                                                                                                                                                                                                                                                                                                                                                                                                                                                                                                                                                                            |            |             |             |            |            |             |             |            |            |             |             |             |            |            |            |             |            |             |             |             |            |             |             |            |             |             |             |            |             |             |             |            |             |            |            |            |             |            |            |            |            |            |             |             |             |             |             |             |             |             |             |             |             |             |             |            |             |             |             |            |             |             |             |            |             |             |             |            |             |             |             |             |             |             |             |             |             |             |            |             |             |             |             |             |             |             |             |                                                                                                                                                                                                                                                                                                                                                                                                                                                                                                                                                                                                                                                                                                                                                                                                                                                                                                                                                                                                                                                                                                                                                                                                                                                                                                                                                                                                                                                                                                                                                                                                                                                                                                                                                                                                                                                                                                                                                                                                                                                                                                                                                                                                                                                                                                                                                                                                                                                                                                                                                                                                                                                                         |   |            |             |            |   |            |            |            |   |            |             |            |   |            |            |            |   |            |            |            |   |            |            |             |   |            |            |             |   |            |             |             |   |            |            |             |   |            |             |            |   |            |             |            |   |            |             |             |   |            |             |             |   |            |             |            |   |            |             |            |   |            |             |             |   |             |            |            |   |             |            |            |   |             |            |             |   |             |            |             |   |            |            |            |   |             |             |            |   |             |            |            |   |             |             |             |   |             |             |            |   |             |            |            |   |             |             |             |   |             |             |             |   |             |             |             |   |             |            |            |   |             |             |             |   |             |             |             |
| H                 | 3.95147700                                                                                                                                                                                                                                                                                                                                                                                                                                                                                                                                                                                                                                                                                                                                                                                                                                                                                                                                                                                                                                                                                                                                                                                                                                                                                                                                                                                                                                                                                                                                                                                                                                                                                                                                                                                                                                                                                                                                                                                                                                                                                                                                                                                                                                                                                                                                                                                                                   | -0.33662500                                                                         | 2.18458500                                                                            |             |             |   |             |             |             |   |             |             |             |   |             |             |             |   |             |             |             |   |             |            |             |   |             |             |             |   |             |             |             |   |             |             |             |   |             |             |             |   |             |             |             |   |             |             |            |   |             |             |             |   |             |             |             |   |             |             |             |   |             |             |             |   |             |             |             |   |             |             |             |                                                                                                                                                                                                                                                                                                                                                                                                                                                                                                                                                                                                                                                                                                                                                                                                                                                                                                                                                                                                                                                                                                                                                                                                                                                                                                                                                                                                                                                                                                                                                                                                                                                                                                                                                                           |            |             |             |            |            |             |             |            |            |            |            |             |            |             |             |             |            |             |             |             |            |             |             |            |            |             |             |            |            |             |            |            |            |             |             |            |            |            |            |            |            |            |            |                                                                                                                                                                                                                                                                                                                                                                                                                                                                                                                                                                                                                                                                                                                                                                                                                                                                                                                                                                                                                                                                                                                                                                                                                                                                                                                                                                                                                                                                                                                                                                                                                                                                                                                                                                                                                                                                                                                                                                                                                                                                                                                                                                                                                                                                                                                                                                                                                                                                                                                                                                                                                                                                            |   |            |             |             |   |            |             |             |   |            |             |            |   |            |             |            |   |            |             |            |   |            |             |             |   |             |             |             |   |             |             |             |   |             |             |             |   |             |             |             |                                                                                                                                                                                                                                                                                                                                                                                                                                                                                                                                                                                                                                                                                                                                                                                                                                                                                                                                                                                                                                                                                                                                                                                                                                                                                                                                                                                                                                                                                                                                                                                                                                                                                                                                                                            |            |             |             |            |            |             |             |            |            |             |             |             |            |            |            |             |            |             |             |             |            |             |             |            |             |             |             |            |             |             |             |            |             |            |            |            |             |            |            |            |            |            |             |             |             |             |             |             |             |             |             |             |             |             |             |            |             |             |             |            |             |             |             |            |             |             |             |            |             |             |             |             |             |             |             |             |             |             |            |             |             |             |             |             |             |             |             |                                                                                                                                                                                                                                                                                                                                                                                                                                                                                                                                                                                                                                                                                                                                                                                                                                                                                                                                                                                                                                                                                                                                                                                                                                                                                                                                                                                                                                                                                                                                                                                                                                                                                                                                                                                                                                                                                                                                                                                                                                                                                                                                                                                                                                                                                                                                                                                                                                                                                                                                                                                                                                                                         |   |            |             |            |   |            |            |            |   |            |             |            |   |            |            |            |   |            |            |            |   |            |            |             |   |            |            |             |   |            |             |             |   |            |            |             |   |            |             |            |   |            |             |            |   |            |             |             |   |            |             |             |   |            |             |            |   |            |             |            |   |            |             |             |   |             |            |            |   |             |            |            |   |             |            |             |   |             |            |             |   |            |            |            |   |             |             |            |   |             |            |            |   |             |             |             |   |             |             |            |   |             |            |            |   |             |             |             |   |             |             |             |   |             |             |             |   |             |            |            |   |             |             |             |   |             |             |             |
| H                 | 5.10097100                                                                                                                                                                                                                                                                                                                                                                                                                                                                                                                                                                                                                                                                                                                                                                                                                                                                                                                                                                                                                                                                                                                                                                                                                                                                                                                                                                                                                                                                                                                                                                                                                                                                                                                                                                                                                                                                                                                                                                                                                                                                                                                                                                                                                                                                                                                                                                                                                   | 0.07065400                                                                          | 0.90039600                                                                            |             |             |   |             |             |             |   |             |             |             |   |             |             |             |   |             |             |             |   |             |            |             |   |             |             |             |   |             |             |             |   |             |             |             |   |             |             |             |   |             |             |             |   |             |             |            |   |             |             |             |   |             |             |             |   |             |             |             |   |             |             |             |   |             |             |             |   |             |             |             |                                                                                                                                                                                                                                                                                                                                                                                                                                                                                                                                                                                                                                                                                                                                                                                                                                                                                                                                                                                                                                                                                                                                                                                                                                                                                                                                                                                                                                                                                                                                                                                                                                                                                                                                                                           |            |             |             |            |            |             |             |            |            |            |            |             |            |             |             |             |            |             |             |             |            |             |             |            |            |             |             |            |            |             |            |            |            |             |             |            |            |            |            |            |            |            |            |                                                                                                                                                                                                                                                                                                                                                                                                                                                                                                                                                                                                                                                                                                                                                                                                                                                                                                                                                                                                                                                                                                                                                                                                                                                                                                                                                                                                                                                                                                                                                                                                                                                                                                                                                                                                                                                                                                                                                                                                                                                                                                                                                                                                                                                                                                                                                                                                                                                                                                                                                                                                                                                                            |   |            |             |             |   |            |             |             |   |            |             |            |   |            |             |            |   |            |             |            |   |            |             |             |   |             |             |             |   |             |             |             |   |             |             |             |   |             |             |             |                                                                                                                                                                                                                                                                                                                                                                                                                                                                                                                                                                                                                                                                                                                                                                                                                                                                                                                                                                                                                                                                                                                                                                                                                                                                                                                                                                                                                                                                                                                                                                                                                                                                                                                                                                            |            |             |             |            |            |             |             |            |            |             |             |             |            |            |            |             |            |             |             |             |            |             |             |            |             |             |             |            |             |             |             |            |             |            |            |            |             |            |            |            |            |            |             |             |             |             |             |             |             |             |             |             |             |             |             |            |             |             |             |            |             |             |             |            |             |             |             |            |             |             |             |             |             |             |             |             |             |             |            |             |             |             |             |             |             |             |             |                                                                                                                                                                                                                                                                                                                                                                                                                                                                                                                                                                                                                                                                                                                                                                                                                                                                                                                                                                                                                                                                                                                                                                                                                                                                                                                                                                                                                                                                                                                                                                                                                                                                                                                                                                                                                                                                                                                                                                                                                                                                                                                                                                                                                                                                                                                                                                                                                                                                                                                                                                                                                                                                         |   |            |             |            |   |            |            |            |   |            |             |            |   |            |            |            |   |            |            |            |   |            |            |             |   |            |            |             |   |            |             |             |   |            |            |             |   |            |             |            |   |            |             |            |   |            |             |             |   |            |             |             |   |            |             |            |   |            |             |            |   |            |             |             |   |             |            |            |   |             |            |            |   |             |            |             |   |             |            |             |   |            |            |            |   |             |             |            |   |             |            |            |   |             |             |             |   |             |             |            |   |             |            |            |   |             |             |             |   |             |             |             |   |             |             |             |   |             |            |            |   |             |             |             |   |             |             |             |
| H                 | 3.84313000                                                                                                                                                                                                                                                                                                                                                                                                                                                                                                                                                                                                                                                                                                                                                                                                                                                                                                                                                                                                                                                                                                                                                                                                                                                                                                                                                                                                                                                                                                                                                                                                                                                                                                                                                                                                                                                                                                                                                                                                                                                                                                                                                                                                                                                                                                                                                                                                                   | 1.22976900                                                                          | 1.36342500                                                                            |             |             |   |             |             |             |   |             |             |             |   |             |             |             |   |             |             |             |   |             |            |             |   |             |             |             |   |             |             |             |   |             |             |             |   |             |             |             |   |             |             |             |   |             |             |            |   |             |             |             |   |             |             |             |   |             |             |             |   |             |             |             |   |             |             |             |   |             |             |             |                                                                                                                                                                                                                                                                                                                                                                                                                                                                                                                                                                                                                                                                                                                                                                                                                                                                                                                                                                                                                                                                                                                                                                                                                                                                                                                                                                                                                                                                                                                                                                                                                                                                                                                                                                           |            |             |             |            |            |             |             |            |            |            |            |             |            |             |             |             |            |             |             |             |            |             |             |            |            |             |             |            |            |             |            |            |            |             |             |            |            |            |            |            |            |            |            |                                                                                                                                                                                                                                                                                                                                                                                                                                                                                                                                                                                                                                                                                                                                                                                                                                                                                                                                                                                                                                                                                                                                                                                                                                                                                                                                                                                                                                                                                                                                                                                                                                                                                                                                                                                                                                                                                                                                                                                                                                                                                                                                                                                                                                                                                                                                                                                                                                                                                                                                                                                                                                                                            |   |            |             |             |   |            |             |             |   |            |             |            |   |            |             |            |   |            |             |            |   |            |             |             |   |             |             |             |   |             |             |             |   |             |             |             |   |             |             |             |                                                                                                                                                                                                                                                                                                                                                                                                                                                                                                                                                                                                                                                                                                                                                                                                                                                                                                                                                                                                                                                                                                                                                                                                                                                                                                                                                                                                                                                                                                                                                                                                                                                                                                                                                                            |            |             |             |            |            |             |             |            |            |             |             |             |            |            |            |             |            |             |             |             |            |             |             |            |             |             |             |            |             |             |             |            |             |            |            |            |             |            |            |            |            |            |             |             |             |             |             |             |             |             |             |             |             |             |             |            |             |             |             |            |             |             |             |            |             |             |             |            |             |             |             |             |             |             |             |             |             |             |            |             |             |             |             |             |             |             |             |                                                                                                                                                                                                                                                                                                                                                                                                                                                                                                                                                                                                                                                                                                                                                                                                                                                                                                                                                                                                                                                                                                                                                                                                                                                                                                                                                                                                                                                                                                                                                                                                                                                                                                                                                                                                                                                                                                                                                                                                                                                                                                                                                                                                                                                                                                                                                                                                                                                                                                                                                                                                                                                                         |   |            |             |            |   |            |            |            |   |            |             |            |   |            |            |            |   |            |            |            |   |            |            |             |   |            |            |             |   |            |             |             |   |            |            |             |   |            |             |            |   |            |             |            |   |            |             |             |   |            |             |             |   |            |             |            |   |            |             |            |   |            |             |             |   |             |            |            |   |             |            |            |   |             |            |             |   |             |            |             |   |            |            |            |   |             |             |            |   |             |            |            |   |             |             |             |   |             |             |            |   |             |            |            |   |             |             |             |   |             |             |             |   |             |             |             |   |             |            |            |   |             |             |             |   |             |             |             |
| C                 | 3.26478500                                                                                                                                                                                                                                                                                                                                                                                                                                                                                                                                                                                                                                                                                                                                                                                                                                                                                                                                                                                                                                                                                                                                                                                                                                                                                                                                                                                                                                                                                                                                                                                                                                                                                                                                                                                                                                                                                                                                                                                                                                                                                                                                                                                                                                                                                                                                                                                                                   | 0.30991200                                                                          | -1.13464400                                                                           |             |             |   |             |             |             |   |             |             |             |   |             |             |             |   |             |             |             |   |             |            |             |   |             |             |             |   |             |             |             |   |             |             |             |   |             |             |             |   |             |             |             |   |             |             |            |   |             |             |             |   |             |             |             |   |             |             |             |   |             |             |             |   |             |             |             |   |             |             |             |                                                                                                                                                                                                                                                                                                                                                                                                                                                                                                                                                                                                                                                                                                                                                                                                                                                                                                                                                                                                                                                                                                                                                                                                                                                                                                                                                                                                                                                                                                                                                                                                                                                                                                                                                                           |            |             |             |            |            |             |             |            |            |            |            |             |            |             |             |             |            |             |             |             |            |             |             |            |            |             |             |            |            |             |            |            |            |             |             |            |            |            |            |            |            |            |            |                                                                                                                                                                                                                                                                                                                                                                                                                                                                                                                                                                                                                                                                                                                                                                                                                                                                                                                                                                                                                                                                                                                                                                                                                                                                                                                                                                                                                                                                                                                                                                                                                                                                                                                                                                                                                                                                                                                                                                                                                                                                                                                                                                                                                                                                                                                                                                                                                                                                                                                                                                                                                                                                            |   |            |             |             |   |            |             |             |   |            |             |            |   |            |             |            |   |            |             |            |   |            |             |             |   |             |             |             |   |             |             |             |   |             |             |             |   |             |             |             |                                                                                                                                                                                                                                                                                                                                                                                                                                                                                                                                                                                                                                                                                                                                                                                                                                                                                                                                                                                                                                                                                                                                                                                                                                                                                                                                                                                                                                                                                                                                                                                                                                                                                                                                                                            |            |             |             |            |            |             |             |            |            |             |             |             |            |            |            |             |            |             |             |             |            |             |             |            |             |             |             |            |             |             |             |            |             |            |            |            |             |            |            |            |            |            |             |             |             |             |             |             |             |             |             |             |             |             |             |            |             |             |             |            |             |             |             |            |             |             |             |            |             |             |             |             |             |             |             |             |             |             |            |             |             |             |             |             |             |             |             |                                                                                                                                                                                                                                                                                                                                                                                                                                                                                                                                                                                                                                                                                                                                                                                                                                                                                                                                                                                                                                                                                                                                                                                                                                                                                                                                                                                                                                                                                                                                                                                                                                                                                                                                                                                                                                                                                                                                                                                                                                                                                                                                                                                                                                                                                                                                                                                                                                                                                                                                                                                                                                                                         |   |            |             |            |   |            |            |            |   |            |             |            |   |            |            |            |   |            |            |            |   |            |            |             |   |            |            |             |   |            |             |             |   |            |            |             |   |            |             |            |   |            |             |            |   |            |             |             |   |            |             |             |   |            |             |            |   |            |             |            |   |            |             |             |   |             |            |            |   |             |            |            |   |             |            |             |   |             |            |             |   |            |            |            |   |             |             |            |   |             |            |            |   |             |             |             |   |             |             |            |   |             |            |            |   |             |             |             |   |             |             |             |   |             |             |             |   |             |            |            |   |             |             |             |   |             |             |             |
| H                 | 4.29774900                                                                                                                                                                                                                                                                                                                                                                                                                                                                                                                                                                                                                                                                                                                                                                                                                                                                                                                                                                                                                                                                                                                                                                                                                                                                                                                                                                                                                                                                                                                                                                                                                                                                                                                                                                                                                                                                                                                                                                                                                                                                                                                                                                                                                                                                                                                                                                                                                   | 0.25263700                                                                          | -1.48291500                                                                           |             |             |   |             |             |             |   |             |             |             |   |             |             |             |   |             |             |             |   |             |            |             |   |             |             |             |   |             |             |             |   |             |             |             |   |             |             |             |   |             |             |             |   |             |             |            |   |             |             |             |   |             |             |             |   |             |             |             |   |             |             |             |   |             |             |             |   |             |             |             |                                                                                                                                                                                                                                                                                                                                                                                                                                                                                                                                                                                                                                                                                                                                                                                                                                                                                                                                                                                                                                                                                                                                                                                                                                                                                                                                                                                                                                                                                                                                                                                                                                                                                                                                                                           |            |             |             |            |            |             |             |            |            |            |            |             |            |             |             |             |            |             |             |             |            |             |             |            |            |             |             |            |            |             |            |            |            |             |             |            |            |            |            |            |            |            |            |                                                                                                                                                                                                                                                                                                                                                                                                                                                                                                                                                                                                                                                                                                                                                                                                                                                                                                                                                                                                                                                                                                                                                                                                                                                                                                                                                                                                                                                                                                                                                                                                                                                                                                                                                                                                                                                                                                                                                                                                                                                                                                                                                                                                                                                                                                                                                                                                                                                                                                                                                                                                                                                                            |   |            |             |             |   |            |             |             |   |            |             |            |   |            |             |            |   |            |             |            |   |            |             |             |   |             |             |             |   |             |             |             |   |             |             |             |   |             |             |             |                                                                                                                                                                                                                                                                                                                                                                                                                                                                                                                                                                                                                                                                                                                                                                                                                                                                                                                                                                                                                                                                                                                                                                                                                                                                                                                                                                                                                                                                                                                                                                                                                                                                                                                                                                            |            |             |             |            |            |             |             |            |            |             |             |             |            |            |            |             |            |             |             |             |            |             |             |            |             |             |             |            |             |             |             |            |             |            |            |            |             |            |            |            |            |            |             |             |             |             |             |             |             |             |             |             |             |             |             |            |             |             |             |            |             |             |             |            |             |             |             |            |             |             |             |             |             |             |             |             |             |             |            |             |             |             |             |             |             |             |             |                                                                                                                                                                                                                                                                                                                                                                                                                                                                                                                                                                                                                                                                                                                                                                                                                                                                                                                                                                                                                                                                                                                                                                                                                                                                                                                                                                                                                                                                                                                                                                                                                                                                                                                                                                                                                                                                                                                                                                                                                                                                                                                                                                                                                                                                                                                                                                                                                                                                                                                                                                                                                                                                         |   |            |             |            |   |            |            |            |   |            |             |            |   |            |            |            |   |            |            |            |   |            |            |             |   |            |            |             |   |            |             |             |   |            |            |             |   |            |             |            |   |            |             |            |   |            |             |             |   |            |             |             |   |            |             |            |   |            |             |            |   |            |             |             |   |             |            |            |   |             |            |            |   |             |            |             |   |             |            |             |   |            |            |            |   |             |             |            |   |             |            |            |   |             |             |             |   |             |             |            |   |             |            |            |   |             |             |             |   |             |             |             |   |             |             |             |   |             |            |            |   |             |             |             |   |             |             |             |
| H                 | 2.61449800                                                                                                                                                                                                                                                                                                                                                                                                                                                                                                                                                                                                                                                                                                                                                                                                                                                                                                                                                                                                                                                                                                                                                                                                                                                                                                                                                                                                                                                                                                                                                                                                                                                                                                                                                                                                                                                                                                                                                                                                                                                                                                                                                                                                                                                                                                                                                                                                                   | -0.11444200                                                                         | -1.89630800                                                                           |             |             |   |             |             |             |   |             |             |             |   |             |             |             |   |             |             |             |   |             |            |             |   |             |             |             |   |             |             |             |   |             |             |             |   |             |             |             |   |             |             |             |   |             |             |            |   |             |             |             |   |             |             |             |   |             |             |             |   |             |             |             |   |             |             |             |   |             |             |             |                                                                                                                                                                                                                                                                                                                                                                                                                                                                                                                                                                                                                                                                                                                                                                                                                                                                                                                                                                                                                                                                                                                                                                                                                                                                                                                                                                                                                                                                                                                                                                                                                                                                                                                                                                           |            |             |             |            |            |             |             |            |            |            |            |             |            |             |             |             |            |             |             |             |            |             |             |            |            |             |             |            |            |             |            |            |            |             |             |            |            |            |            |            |            |            |            |                                                                                                                                                                                                                                                                                                                                                                                                                                                                                                                                                                                                                                                                                                                                                                                                                                                                                                                                                                                                                                                                                                                                                                                                                                                                                                                                                                                                                                                                                                                                                                                                                                                                                                                                                                                                                                                                                                                                                                                                                                                                                                                                                                                                                                                                                                                                                                                                                                                                                                                                                                                                                                                                            |   |            |             |             |   |            |             |             |   |            |             |            |   |            |             |            |   |            |             |            |   |            |             |             |   |             |             |             |   |             |             |             |   |             |             |             |   |             |             |             |                                                                                                                                                                                                                                                                                                                                                                                                                                                                                                                                                                                                                                                                                                                                                                                                                                                                                                                                                                                                                                                                                                                                                                                                                                                                                                                                                                                                                                                                                                                                                                                                                                                                                                                                                                            |            |             |             |            |            |             |             |            |            |             |             |             |            |            |            |             |            |             |             |             |            |             |             |            |             |             |             |            |             |             |             |            |             |            |            |            |             |            |            |            |            |            |             |             |             |             |             |             |             |             |             |             |             |             |             |            |             |             |             |            |             |             |             |            |             |             |             |            |             |             |             |             |             |             |             |             |             |             |            |             |             |             |             |             |             |             |             |                                                                                                                                                                                                                                                                                                                                                                                                                                                                                                                                                                                                                                                                                                                                                                                                                                                                                                                                                                                                                                                                                                                                                                                                                                                                                                                                                                                                                                                                                                                                                                                                                                                                                                                                                                                                                                                                                                                                                                                                                                                                                                                                                                                                                                                                                                                                                                                                                                                                                                                                                                                                                                                                         |   |            |             |            |   |            |            |            |   |            |             |            |   |            |            |            |   |            |            |            |   |            |            |             |   |            |            |             |   |            |             |             |   |            |            |             |   |            |             |            |   |            |             |            |   |            |             |             |   |            |             |             |   |            |             |            |   |            |             |            |   |            |             |             |   |             |            |            |   |             |            |            |   |             |            |             |   |             |            |             |   |            |            |            |   |             |             |            |   |             |            |            |   |             |             |             |   |             |             |            |   |             |            |            |   |             |             |             |   |             |             |             |   |             |             |             |   |             |            |            |   |             |             |             |   |             |             |             |
| H                 | 3.00963000                                                                                                                                                                                                                                                                                                                                                                                                                                                                                                                                                                                                                                                                                                                                                                                                                                                                                                                                                                                                                                                                                                                                                                                                                                                                                                                                                                                                                                                                                                                                                                                                                                                                                                                                                                                                                                                                                                                                                                                                                                                                                                                                                                                                                                                                                                                                                                                                                   | 1.36274600                                                                          | -0.99720000                                                                           |             |             |   |             |             |             |   |             |             |             |   |             |             |             |   |             |             |             |   |             |            |             |   |             |             |             |   |             |             |             |   |             |             |             |   |             |             |             |   |             |             |             |   |             |             |            |   |             |             |             |   |             |             |             |   |             |             |             |   |             |             |             |   |             |             |             |   |             |             |             |                                                                                                                                                                                                                                                                                                                                                                                                                                                                                                                                                                                                                                                                                                                                                                                                                                                                                                                                                                                                                                                                                                                                                                                                                                                                                                                                                                                                                                                                                                                                                                                                                                                                                                                                                                           |            |             |             |            |            |             |             |            |            |            |            |             |            |             |             |             |            |             |             |             |            |             |             |            |            |             |             |            |            |             |            |            |            |             |             |            |            |            |            |            |            |            |            |                                                                                                                                                                                                                                                                                                                                                                                                                                                                                                                                                                                                                                                                                                                                                                                                                                                                                                                                                                                                                                                                                                                                                                                                                                                                                                                                                                                                                                                                                                                                                                                                                                                                                                                                                                                                                                                                                                                                                                                                                                                                                                                                                                                                                                                                                                                                                                                                                                                                                                                                                                                                                                                                            |   |            |             |             |   |            |             |             |   |            |             |            |   |            |             |            |   |            |             |            |   |            |             |             |   |             |             |             |   |             |             |             |   |             |             |             |   |             |             |             |                                                                                                                                                                                                                                                                                                                                                                                                                                                                                                                                                                                                                                                                                                                                                                                                                                                                                                                                                                                                                                                                                                                                                                                                                                                                                                                                                                                                                                                                                                                                                                                                                                                                                                                                                                            |            |             |             |            |            |             |             |            |            |             |             |             |            |            |            |             |            |             |             |             |            |             |             |            |             |             |             |            |             |             |             |            |             |            |            |            |             |            |            |            |            |            |             |             |             |             |             |             |             |             |             |             |             |             |             |            |             |             |             |            |             |             |             |            |             |             |             |            |             |             |             |             |             |             |             |             |             |             |            |             |             |             |             |             |             |             |             |                                                                                                                                                                                                                                                                                                                                                                                                                                                                                                                                                                                                                                                                                                                                                                                                                                                                                                                                                                                                                                                                                                                                                                                                                                                                                                                                                                                                                                                                                                                                                                                                                                                                                                                                                                                                                                                                                                                                                                                                                                                                                                                                                                                                                                                                                                                                                                                                                                                                                                                                                                                                                                                                         |   |            |             |            |   |            |            |            |   |            |             |            |   |            |            |            |   |            |            |            |   |            |            |             |   |            |            |             |   |            |             |             |   |            |            |             |   |            |             |            |   |            |             |            |   |            |             |             |   |            |             |             |   |            |             |            |   |            |             |            |   |            |             |             |   |             |            |            |   |             |            |            |   |             |            |             |   |             |            |             |   |            |            |            |   |             |             |            |   |             |            |            |   |             |             |             |   |             |             |            |   |             |            |            |   |             |             |             |   |             |             |             |   |             |             |             |   |             |            |            |   |             |             |             |   |             |             |             |
| C                 | 3.43372900                                                                                                                                                                                                                                                                                                                                                                                                                                                                                                                                                                                                                                                                                                                                                                                                                                                                                                                                                                                                                                                                                                                                                                                                                                                                                                                                                                                                                                                                                                                                                                                                                                                                                                                                                                                                                                                                                                                                                                                                                                                                                                                                                                                                                                                                                                                                                                                                                   | -1.92652100                                                                         | 0.03079000                                                                            |             |             |   |             |             |             |   |             |             |             |   |             |             |             |   |             |             |             |   |             |            |             |   |             |             |             |   |             |             |             |   |             |             |             |   |             |             |             |   |             |             |             |   |             |             |            |   |             |             |             |   |             |             |             |   |             |             |             |   |             |             |             |   |             |             |             |   |             |             |             |                                                                                                                                                                                                                                                                                                                                                                                                                                                                                                                                                                                                                                                                                                                                                                                                                                                                                                                                                                                                                                                                                                                                                                                                                                                                                                                                                                                                                                                                                                                                                                                                                                                                                                                                                                           |            |             |             |            |            |             |             |            |            |            |            |             |            |             |             |             |            |             |             |             |            |             |             |            |            |             |             |            |            |             |            |            |            |             |             |            |            |            |            |            |            |            |            |                                                                                                                                                                                                                                                                                                                                                                                                                                                                                                                                                                                                                                                                                                                                                                                                                                                                                                                                                                                                                                                                                                                                                                                                                                                                                                                                                                                                                                                                                                                                                                                                                                                                                                                                                                                                                                                                                                                                                                                                                                                                                                                                                                                                                                                                                                                                                                                                                                                                                                                                                                                                                                                                            |   |            |             |             |   |            |             |             |   |            |             |            |   |            |             |            |   |            |             |            |   |            |             |             |   |             |             |             |   |             |             |             |   |             |             |             |   |             |             |             |                                                                                                                                                                                                                                                                                                                                                                                                                                                                                                                                                                                                                                                                                                                                                                                                                                                                                                                                                                                                                                                                                                                                                                                                                                                                                                                                                                                                                                                                                                                                                                                                                                                                                                                                                                            |            |             |             |            |            |             |             |            |            |             |             |             |            |            |            |             |            |             |             |             |            |             |             |            |             |             |             |            |             |             |             |            |             |            |            |            |             |            |            |            |            |            |             |             |             |             |             |             |             |             |             |             |             |             |             |            |             |             |             |            |             |             |             |            |             |             |             |            |             |             |             |             |             |             |             |             |             |             |            |             |             |             |             |             |             |             |             |                                                                                                                                                                                                                                                                                                                                                                                                                                                                                                                                                                                                                                                                                                                                                                                                                                                                                                                                                                                                                                                                                                                                                                                                                                                                                                                                                                                                                                                                                                                                                                                                                                                                                                                                                                                                                                                                                                                                                                                                                                                                                                                                                                                                                                                                                                                                                                                                                                                                                                                                                                                                                                                                         |   |            |             |            |   |            |            |            |   |            |             |            |   |            |            |            |   |            |            |            |   |            |            |             |   |            |            |             |   |            |             |             |   |            |            |             |   |            |             |            |   |            |             |            |   |            |             |             |   |            |             |             |   |            |             |            |   |            |             |            |   |            |             |             |   |             |            |            |   |             |            |            |   |             |            |             |   |             |            |             |   |            |            |            |   |             |             |            |   |             |            |            |   |             |             |             |   |             |             |            |   |             |            |            |   |             |             |             |   |             |             |             |   |             |             |             |   |             |            |            |   |             |             |             |   |             |             |             |
| H                 | 3.27114800                                                                                                                                                                                                                                                                                                                                                                                                                                                                                                                                                                                                                                                                                                                                                                                                                                                                                                                                                                                                                                                                                                                                                                                                                                                                                                                                                                                                                                                                                                                                                                                                                                                                                                                                                                                                                                                                                                                                                                                                                                                                                                                                                                                                                                                                                                                                                                                                                   | -2.44371800                                                                         | 0.97864800                                                                            |             |             |   |             |             |             |   |             |             |             |   |             |             |             |   |             |             |             |   |             |            |             |   |             |             |             |   |             |             |             |   |             |             |             |   |             |             |             |   |             |             |             |   |             |             |            |   |             |             |             |   |             |             |             |   |             |             |             |   |             |             |             |   |             |             |             |   |             |             |             |                                                                                                                                                                                                                                                                                                                                                                                                                                                                                                                                                                                                                                                                                                                                                                                                                                                                                                                                                                                                                                                                                                                                                                                                                                                                                                                                                                                                                                                                                                                                                                                                                                                                                                                                                                           |            |             |             |            |            |             |             |            |            |            |            |             |            |             |             |             |            |             |             |             |            |             |             |            |            |             |             |            |            |             |            |            |            |             |             |            |            |            |            |            |            |            |            |                                                                                                                                                                                                                                                                                                                                                                                                                                                                                                                                                                                                                                                                                                                                                                                                                                                                                                                                                                                                                                                                                                                                                                                                                                                                                                                                                                                                                                                                                                                                                                                                                                                                                                                                                                                                                                                                                                                                                                                                                                                                                                                                                                                                                                                                                                                                                                                                                                                                                                                                                                                                                                                                            |   |            |             |             |   |            |             |             |   |            |             |            |   |            |             |            |   |            |             |            |   |            |             |             |   |             |             |             |   |             |             |             |   |             |             |             |   |             |             |             |                                                                                                                                                                                                                                                                                                                                                                                                                                                                                                                                                                                                                                                                                                                                                                                                                                                                                                                                                                                                                                                                                                                                                                                                                                                                                                                                                                                                                                                                                                                                                                                                                                                                                                                                                                            |            |             |             |            |            |             |             |            |            |             |             |             |            |            |            |             |            |             |             |             |            |             |             |            |             |             |             |            |             |             |             |            |             |            |            |            |             |            |            |            |            |            |             |             |             |             |             |             |             |             |             |             |             |             |             |            |             |             |             |            |             |             |             |            |             |             |             |            |             |             |             |             |             |             |             |             |             |             |            |             |             |             |             |             |             |             |             |                                                                                                                                                                                                                                                                                                                                                                                                                                                                                                                                                                                                                                                                                                                                                                                                                                                                                                                                                                                                                                                                                                                                                                                                                                                                                                                                                                                                                                                                                                                                                                                                                                                                                                                                                                                                                                                                                                                                                                                                                                                                                                                                                                                                                                                                                                                                                                                                                                                                                                                                                                                                                                                                         |   |            |             |            |   |            |            |            |   |            |             |            |   |            |            |            |   |            |            |            |   |            |            |             |   |            |            |             |   |            |             |             |   |            |            |             |   |            |             |            |   |            |             |            |   |            |             |             |   |            |             |             |   |            |             |            |   |            |             |            |   |            |             |             |   |             |            |            |   |             |            |            |   |             |            |             |   |             |            |             |   |            |            |            |   |             |             |            |   |             |            |            |   |             |             |             |   |             |             |            |   |             |            |            |   |             |             |             |   |             |             |             |   |             |             |             |   |             |            |            |   |             |             |             |   |             |             |             |
| H                 | 2.80003900                                                                                                                                                                                                                                                                                                                                                                                                                                                                                                                                                                                                                                                                                                                                                                                                                                                                                                                                                                                                                                                                                                                                                                                                                                                                                                                                                                                                                                                                                                                                                                                                                                                                                                                                                                                                                                                                                                                                                                                                                                                                                                                                                                                                                                                                                                                                                                                                                   | -2.37723900                                                                         | -0.72838000                                                                           |             |             |   |             |             |             |   |             |             |             |   |             |             |             |   |             |             |             |   |             |            |             |   |             |             |             |   |             |             |             |   |             |             |             |   |             |             |             |   |             |             |             |   |             |             |            |   |             |             |             |   |             |             |             |   |             |             |             |   |             |             |             |   |             |             |             |   |             |             |             |                                                                                                                                                                                                                                                                                                                                                                                                                                                                                                                                                                                                                                                                                                                                                                                                                                                                                                                                                                                                                                                                                                                                                                                                                                                                                                                                                                                                                                                                                                                                                                                                                                                                                                                                                                           |            |             |             |            |            |             |             |            |            |            |            |             |            |             |             |             |            |             |             |             |            |             |             |            |            |             |             |            |            |             |            |            |            |             |             |            |            |            |            |            |            |            |            |                                                                                                                                                                                                                                                                                                                                                                                                                                                                                                                                                                                                                                                                                                                                                                                                                                                                                                                                                                                                                                                                                                                                                                                                                                                                                                                                                                                                                                                                                                                                                                                                                                                                                                                                                                                                                                                                                                                                                                                                                                                                                                                                                                                                                                                                                                                                                                                                                                                                                                                                                                                                                                                                            |   |            |             |             |   |            |             |             |   |            |             |            |   |            |             |            |   |            |             |            |   |            |             |             |   |             |             |             |   |             |             |             |   |             |             |             |   |             |             |             |                                                                                                                                                                                                                                                                                                                                                                                                                                                                                                                                                                                                                                                                                                                                                                                                                                                                                                                                                                                                                                                                                                                                                                                                                                                                                                                                                                                                                                                                                                                                                                                                                                                                                                                                                                            |            |             |             |            |            |             |             |            |            |             |             |             |            |            |            |             |            |             |             |             |            |             |             |            |             |             |             |            |             |             |             |            |             |            |            |            |             |            |            |            |            |            |             |             |             |             |             |             |             |             |             |             |             |             |             |            |             |             |             |            |             |             |             |            |             |             |             |            |             |             |             |             |             |             |             |             |             |             |            |             |             |             |             |             |             |             |             |                                                                                                                                                                                                                                                                                                                                                                                                                                                                                                                                                                                                                                                                                                                                                                                                                                                                                                                                                                                                                                                                                                                                                                                                                                                                                                                                                                                                                                                                                                                                                                                                                                                                                                                                                                                                                                                                                                                                                                                                                                                                                                                                                                                                                                                                                                                                                                                                                                                                                                                                                                                                                                                                         |   |            |             |            |   |            |            |            |   |            |             |            |   |            |            |            |   |            |            |            |   |            |            |             |   |            |            |             |   |            |             |             |   |            |            |             |   |            |             |            |   |            |             |            |   |            |             |             |   |            |             |             |   |            |             |            |   |            |             |            |   |            |             |             |   |             |            |            |   |             |            |            |   |             |            |             |   |             |            |             |   |            |            |            |   |             |             |            |   |             |            |            |   |             |             |             |   |             |             |            |   |             |            |            |   |             |             |             |   |             |             |             |   |             |             |             |   |             |            |            |   |             |             |             |   |             |             |             |
| H                 | 4.48035600                                                                                                                                                                                                                                                                                                                                                                                                                                                                                                                                                                                                                                                                                                                                                                                                                                                                                                                                                                                                                                                                                                                                                                                                                                                                                                                                                                                                                                                                                                                                                                                                                                                                                                                                                                                                                                                                                                                                                                                                                                                                                                                                                                                                                                                                                                                                                                                                                   | -2.05602500                                                                         | -0.25279000                                                                           |             |             |   |             |             |             |   |             |             |             |   |             |             |             |   |             |             |             |   |             |            |             |   |             |             |             |   |             |             |             |   |             |             |             |   |             |             |             |   |             |             |             |   |             |             |            |   |             |             |             |   |             |             |             |   |             |             |             |   |             |             |             |   |             |             |             |   |             |             |             |                                                                                                                                                                                                                                                                                                                                                                                                                                                                                                                                                                                                                                                                                                                                                                                                                                                                                                                                                                                                                                                                                                                                                                                                                                                                                                                                                                                                                                                                                                                                                                                                                                                                                                                                                                           |            |             |             |            |            |             |             |            |            |            |            |             |            |             |             |             |            |             |             |             |            |             |             |            |            |             |             |            |            |             |            |            |            |             |             |            |            |            |            |            |            |            |            |                                                                                                                                                                                                                                                                                                                                                                                                                                                                                                                                                                                                                                                                                                                                                                                                                                                                                                                                                                                                                                                                                                                                                                                                                                                                                                                                                                                                                                                                                                                                                                                                                                                                                                                                                                                                                                                                                                                                                                                                                                                                                                                                                                                                                                                                                                                                                                                                                                                                                                                                                                                                                                                                            |   |            |             |             |   |            |             |             |   |            |             |            |   |            |             |            |   |            |             |            |   |            |             |             |   |             |             |             |   |             |             |             |   |             |             |             |   |             |             |             |                                                                                                                                                                                                                                                                                                                                                                                                                                                                                                                                                                                                                                                                                                                                                                                                                                                                                                                                                                                                                                                                                                                                                                                                                                                                                                                                                                                                                                                                                                                                                                                                                                                                                                                                                                            |            |             |             |            |            |             |             |            |            |             |             |             |            |            |            |             |            |             |             |             |            |             |             |            |             |             |             |            |             |             |             |            |             |            |            |            |             |            |            |            |            |            |             |             |             |             |             |             |             |             |             |             |             |             |             |            |             |             |             |            |             |             |             |            |             |             |             |            |             |             |             |             |             |             |             |             |             |             |            |             |             |             |             |             |             |             |             |                                                                                                                                                                                                                                                                                                                                                                                                                                                                                                                                                                                                                                                                                                                                                                                                                                                                                                                                                                                                                                                                                                                                                                                                                                                                                                                                                                                                                                                                                                                                                                                                                                                                                                                                                                                                                                                                                                                                                                                                                                                                                                                                                                                                                                                                                                                                                                                                                                                                                                                                                                                                                                                                         |   |            |             |            |   |            |            |            |   |            |             |            |   |            |            |            |   |            |            |            |   |            |            |             |   |            |            |             |   |            |             |             |   |            |            |             |   |            |             |            |   |            |             |            |   |            |             |             |   |            |             |             |   |            |             |            |   |            |             |            |   |            |             |             |   |             |            |            |   |             |            |            |   |             |            |             |   |             |            |             |   |            |            |            |   |             |             |            |   |             |            |            |   |             |             |             |   |             |             |            |   |             |            |            |   |             |             |             |   |             |             |             |   |             |             |             |   |             |            |            |   |             |             |             |   |             |             |             |
| O                 | 1.82015200                                                                                                                                                                                                                                                                                                                                                                                                                                                                                                                                                                                                                                                                                                                                                                                                                                                                                                                                                                                                                                                                                                                                                                                                                                                                                                                                                                                                                                                                                                                                                                                                                                                                                                                                                                                                                                                                                                                                                                                                                                                                                                                                                                                                                                                                                                                                                                                                                   | -0.22808600                                                                         | 0.75865900                                                                            |             |             |   |             |             |             |   |             |             |             |   |             |             |             |   |             |             |             |   |             |            |             |   |             |             |             |   |             |             |             |   |             |             |             |   |             |             |             |   |             |             |             |   |             |             |            |   |             |             |             |   |             |             |             |   |             |             |             |   |             |             |             |   |             |             |             |   |             |             |             |                                                                                                                                                                                                                                                                                                                                                                                                                                                                                                                                                                                                                                                                                                                                                                                                                                                                                                                                                                                                                                                                                                                                                                                                                                                                                                                                                                                                                                                                                                                                                                                                                                                                                                                                                                           |            |             |             |            |            |             |             |            |            |            |            |             |            |             |             |             |            |             |             |             |            |             |             |            |            |             |             |            |            |             |            |            |            |             |             |            |            |            |            |            |            |            |            |                                                                                                                                                                                                                                                                                                                                                                                                                                                                                                                                                                                                                                                                                                                                                                                                                                                                                                                                                                                                                                                                                                                                                                                                                                                                                                                                                                                                                                                                                                                                                                                                                                                                                                                                                                                                                                                                                                                                                                                                                                                                                                                                                                                                                                                                                                                                                                                                                                                                                                                                                                                                                                                                            |   |            |             |             |   |            |             |             |   |            |             |            |   |            |             |            |   |            |             |            |   |            |             |             |   |             |             |             |   |             |             |             |   |             |             |             |   |             |             |             |                                                                                                                                                                                                                                                                                                                                                                                                                                                                                                                                                                                                                                                                                                                                                                                                                                                                                                                                                                                                                                                                                                                                                                                                                                                                                                                                                                                                                                                                                                                                                                                                                                                                                                                                                                            |            |             |             |            |            |             |             |            |            |             |             |             |            |            |            |             |            |             |             |             |            |             |             |            |             |             |             |            |             |             |             |            |             |            |            |            |             |            |            |            |            |            |             |             |             |             |             |             |             |             |             |             |             |             |             |            |             |             |             |            |             |             |             |            |             |             |             |            |             |             |             |             |             |             |             |             |             |             |            |             |             |             |             |             |             |             |             |                                                                                                                                                                                                                                                                                                                                                                                                                                                                                                                                                                                                                                                                                                                                                                                                                                                                                                                                                                                                                                                                                                                                                                                                                                                                                                                                                                                                                                                                                                                                                                                                                                                                                                                                                                                                                                                                                                                                                                                                                                                                                                                                                                                                                                                                                                                                                                                                                                                                                                                                                                                                                                                                         |   |            |             |            |   |            |            |            |   |            |             |            |   |            |            |            |   |            |            |            |   |            |            |             |   |            |            |             |   |            |             |             |   |            |            |             |   |            |             |            |   |            |             |            |   |            |             |             |   |            |             |             |   |            |             |            |   |            |             |            |   |            |             |             |   |             |            |            |   |             |            |            |   |             |            |             |   |             |            |             |   |            |            |            |   |             |             |            |   |             |            |            |   |             |             |             |   |             |             |            |   |             |            |            |   |             |             |             |   |             |             |             |   |             |             |             |   |             |            |            |   |             |             |             |   |             |             |             |
| C                 | 0.66199200                                                                                                                                                                                                                                                                                                                                                                                                                                                                                                                                                                                                                                                                                                                                                                                                                                                                                                                                                                                                                                                                                                                                                                                                                                                                                                                                                                                                                                                                                                                                                                                                                                                                                                                                                                                                                                                                                                                                                                                                                                                                                                                                                                                                                                                                                                                                                                                                                   | -0.52654500                                                                         | 0.07546000                                                                            |             |             |   |             |             |             |   |             |             |             |   |             |             |             |   |             |             |             |   |             |            |             |   |             |             |             |   |             |             |             |   |             |             |             |   |             |             |             |   |             |             |             |   |             |             |            |   |             |             |             |   |             |             |             |   |             |             |             |   |             |             |             |   |             |             |             |   |             |             |             |                                                                                                                                                                                                                                                                                                                                                                                                                                                                                                                                                                                                                                                                                                                                                                                                                                                                                                                                                                                                                                                                                                                                                                                                                                                                                                                                                                                                                                                                                                                                                                                                                                                                                                                                                                           |            |             |             |            |            |             |             |            |            |            |            |             |            |             |             |             |            |             |             |             |            |             |             |            |            |             |             |            |            |             |            |            |            |             |             |            |            |            |            |            |            |            |            |                                                                                                                                                                                                                                                                                                                                                                                                                                                                                                                                                                                                                                                                                                                                                                                                                                                                                                                                                                                                                                                                                                                                                                                                                                                                                                                                                                                                                                                                                                                                                                                                                                                                                                                                                                                                                                                                                                                                                                                                                                                                                                                                                                                                                                                                                                                                                                                                                                                                                                                                                                                                                                                                            |   |            |             |             |   |            |             |             |   |            |             |            |   |            |             |            |   |            |             |            |   |            |             |             |   |             |             |             |   |             |             |             |   |             |             |             |   |             |             |             |                                                                                                                                                                                                                                                                                                                                                                                                                                                                                                                                                                                                                                                                                                                                                                                                                                                                                                                                                                                                                                                                                                                                                                                                                                                                                                                                                                                                                                                                                                                                                                                                                                                                                                                                                                            |            |             |             |            |            |             |             |            |            |             |             |             |            |            |            |             |            |             |             |             |            |             |             |            |             |             |             |            |             |             |             |            |             |            |            |            |             |            |            |            |            |            |             |             |             |             |             |             |             |             |             |             |             |             |             |            |             |             |             |            |             |             |             |            |             |             |             |            |             |             |             |             |             |             |             |             |             |             |            |             |             |             |             |             |             |             |             |                                                                                                                                                                                                                                                                                                                                                                                                                                                                                                                                                                                                                                                                                                                                                                                                                                                                                                                                                                                                                                                                                                                                                                                                                                                                                                                                                                                                                                                                                                                                                                                                                                                                                                                                                                                                                                                                                                                                                                                                                                                                                                                                                                                                                                                                                                                                                                                                                                                                                                                                                                                                                                                                         |   |            |             |            |   |            |            |            |   |            |             |            |   |            |            |            |   |            |            |            |   |            |            |             |   |            |            |             |   |            |             |             |   |            |            |             |   |            |             |            |   |            |             |            |   |            |             |             |   |            |             |             |   |            |             |            |   |            |             |            |   |            |             |             |   |             |            |            |   |             |            |            |   |             |            |             |   |             |            |             |   |            |            |            |   |             |             |            |   |             |            |            |   |             |             |             |   |             |             |            |   |             |            |            |   |             |             |             |   |             |             |             |   |             |             |             |   |             |            |            |   |             |             |             |   |             |             |             |
| O                 | 0.67980700                                                                                                                                                                                                                                                                                                                                                                                                                                                                                                                                                                                                                                                                                                                                                                                                                                                                                                                                                                                                                                                                                                                                                                                                                                                                                                                                                                                                                                                                                                                                                                                                                                                                                                                                                                                                                                                                                                                                                                                                                                                                                                                                                                                                                                                                                                                                                                                                                   | -1.25055000                                                                         | -0.92111900                                                                           |             |             |   |             |             |             |   |             |             |             |   |             |             |             |   |             |             |             |   |             |            |             |   |             |             |             |   |             |             |             |   |             |             |             |   |             |             |             |   |             |             |             |   |             |             |            |   |             |             |             |   |             |             |             |   |             |             |             |   |             |             |             |   |             |             |             |   |             |             |             |                                                                                                                                                                                                                                                                                                                                                                                                                                                                                                                                                                                                                                                                                                                                                                                                                                                                                                                                                                                                                                                                                                                                                                                                                                                                                                                                                                                                                                                                                                                                                                                                                                                                                                                                                                           |            |             |             |            |            |             |             |            |            |            |            |             |            |             |             |             |            |             |             |             |            |             |             |            |            |             |             |            |            |             |            |            |            |             |             |            |            |            |            |            |            |            |            |                                                                                                                                                                                                                                                                                                                                                                                                                                                                                                                                                                                                                                                                                                                                                                                                                                                                                                                                                                                                                                                                                                                                                                                                                                                                                                                                                                                                                                                                                                                                                                                                                                                                                                                                                                                                                                                                                                                                                                                                                                                                                                                                                                                                                                                                                                                                                                                                                                                                                                                                                                                                                                                                            |   |            |             |             |   |            |             |             |   |            |             |            |   |            |             |            |   |            |             |            |   |            |             |             |   |             |             |             |   |             |             |             |   |             |             |             |   |             |             |             |                                                                                                                                                                                                                                                                                                                                                                                                                                                                                                                                                                                                                                                                                                                                                                                                                                                                                                                                                                                                                                                                                                                                                                                                                                                                                                                                                                                                                                                                                                                                                                                                                                                                                                                                                                            |            |             |             |            |            |             |             |            |            |             |             |             |            |            |            |             |            |             |             |             |            |             |             |            |             |             |             |            |             |             |             |            |             |            |            |            |             |            |            |            |            |            |             |             |             |             |             |             |             |             |             |             |             |             |             |            |             |             |             |            |             |             |             |            |             |             |             |            |             |             |             |             |             |             |             |             |             |             |            |             |             |             |             |             |             |             |             |                                                                                                                                                                                                                                                                                                                                                                                                                                                                                                                                                                                                                                                                                                                                                                                                                                                                                                                                                                                                                                                                                                                                                                                                                                                                                                                                                                                                                                                                                                                                                                                                                                                                                                                                                                                                                                                                                                                                                                                                                                                                                                                                                                                                                                                                                                                                                                                                                                                                                                                                                                                                                                                                         |   |            |             |            |   |            |            |            |   |            |             |            |   |            |            |            |   |            |            |            |   |            |            |             |   |            |            |             |   |            |             |             |   |            |            |             |   |            |             |            |   |            |             |            |   |            |             |             |   |            |             |             |   |            |             |            |   |            |             |            |   |            |             |             |   |             |            |            |   |             |            |            |   |             |            |             |   |             |            |             |   |            |            |            |   |             |             |            |   |             |            |            |   |             |             |             |   |             |             |            |   |             |            |            |   |             |             |             |   |             |             |             |   |             |             |             |   |             |            |            |   |             |             |             |   |             |             |             |
| O                 | -0.45154200                                                                                                                                                                                                                                                                                                                                                                                                                                                                                                                                                                                                                                                                                                                                                                                                                                                                                                                                                                                                                                                                                                                                                                                                                                                                                                                                                                                                                                                                                                                                                                                                                                                                                                                                                                                                                                                                                                                                                                                                                                                                                                                                                                                                                                                                                                                                                                                                                  | 0.11716900                                                                          | 0.66940600                                                                            |             |             |   |             |             |             |   |             |             |             |   |             |             |             |   |             |             |             |   |             |            |             |   |             |             |             |   |             |             |             |   |             |             |             |   |             |             |             |   |             |             |             |   |             |             |            |   |             |             |             |   |             |             |             |   |             |             |             |   |             |             |             |   |             |             |             |   |             |             |             |                                                                                                                                                                                                                                                                                                                                                                                                                                                                                                                                                                                                                                                                                                                                                                                                                                                                                                                                                                                                                                                                                                                                                                                                                                                                                                                                                                                                                                                                                                                                                                                                                                                                                                                                                                           |            |             |             |            |            |             |             |            |            |            |            |             |            |             |             |             |            |             |             |             |            |             |             |            |            |             |             |            |            |             |            |            |            |             |             |            |            |            |            |            |            |            |            |                                                                                                                                                                                                                                                                                                                                                                                                                                                                                                                                                                                                                                                                                                                                                                                                                                                                                                                                                                                                                                                                                                                                                                                                                                                                                                                                                                                                                                                                                                                                                                                                                                                                                                                                                                                                                                                                                                                                                                                                                                                                                                                                                                                                                                                                                                                                                                                                                                                                                                                                                                                                                                                                            |   |            |             |             |   |            |             |             |   |            |             |            |   |            |             |            |   |            |             |            |   |            |             |             |   |             |             |             |   |             |             |             |   |             |             |             |   |             |             |             |                                                                                                                                                                                                                                                                                                                                                                                                                                                                                                                                                                                                                                                                                                                                                                                                                                                                                                                                                                                                                                                                                                                                                                                                                                                                                                                                                                                                                                                                                                                                                                                                                                                                                                                                                                            |            |             |             |            |            |             |             |            |            |             |             |             |            |            |            |             |            |             |             |             |            |             |             |            |             |             |             |            |             |             |             |            |             |            |            |            |             |            |            |            |            |            |             |             |             |             |             |             |             |             |             |             |             |             |             |            |             |             |             |            |             |             |             |            |             |             |             |            |             |             |             |             |             |             |             |             |             |             |            |             |             |             |             |             |             |             |             |                                                                                                                                                                                                                                                                                                                                                                                                                                                                                                                                                                                                                                                                                                                                                                                                                                                                                                                                                                                                                                                                                                                                                                                                                                                                                                                                                                                                                                                                                                                                                                                                                                                                                                                                                                                                                                                                                                                                                                                                                                                                                                                                                                                                                                                                                                                                                                                                                                                                                                                                                                                                                                                                         |   |            |             |            |   |            |            |            |   |            |             |            |   |            |            |            |   |            |            |            |   |            |            |             |   |            |            |             |   |            |             |             |   |            |            |             |   |            |             |            |   |            |             |            |   |            |             |             |   |            |             |             |   |            |             |            |   |            |             |            |   |            |             |             |   |             |            |            |   |             |            |            |   |             |            |             |   |             |            |             |   |            |            |            |   |             |             |            |   |             |            |            |   |             |             |             |   |             |             |            |   |             |            |            |   |             |             |             |   |             |             |             |   |             |             |             |   |             |            |            |   |             |             |             |   |             |             |             |
| H                 | -0.25348500                                                                                                                                                                                                                                                                                                                                                                                                                                                                                                                                                                                                                                                                                                                                                                                                                                                                                                                                                                                                                                                                                                                                                                                                                                                                                                                                                                                                                                                                                                                                                                                                                                                                                                                                                                                                                                                                                                                                                                                                                                                                                                                                                                                                                                                                                                                                                                                                                  | 0.59571500                                                                          | 1.61925500                                                                            |             |             |   |             |             |             |   |             |             |             |   |             |             |             |   |             |             |             |   |             |            |             |   |             |             |             |   |             |             |             |   |             |             |             |   |             |             |             |   |             |             |             |   |             |             |            |   |             |             |             |   |             |             |             |   |             |             |             |   |             |             |             |   |             |             |             |   |             |             |             |                                                                                                                                                                                                                                                                                                                                                                                                                                                                                                                                                                                                                                                                                                                                                                                                                                                                                                                                                                                                                                                                                                                                                                                                                                                                                                                                                                                                                                                                                                                                                                                                                                                                                                                                                                           |            |             |             |            |            |             |             |            |            |            |            |             |            |             |             |             |            |             |             |             |            |             |             |            |            |             |             |            |            |             |            |            |            |             |             |            |            |            |            |            |            |            |            |                                                                                                                                                                                                                                                                                                                                                                                                                                                                                                                                                                                                                                                                                                                                                                                                                                                                                                                                                                                                                                                                                                                                                                                                                                                                                                                                                                                                                                                                                                                                                                                                                                                                                                                                                                                                                                                                                                                                                                                                                                                                                                                                                                                                                                                                                                                                                                                                                                                                                                                                                                                                                                                                            |   |            |             |             |   |            |             |             |   |            |             |            |   |            |             |            |   |            |             |            |   |            |             |             |   |             |             |             |   |             |             |             |   |             |             |             |   |             |             |             |                                                                                                                                                                                                                                                                                                                                                                                                                                                                                                                                                                                                                                                                                                                                                                                                                                                                                                                                                                                                                                                                                                                                                                                                                                                                                                                                                                                                                                                                                                                                                                                                                                                                                                                                                                            |            |             |             |            |            |             |             |            |            |             |             |             |            |            |            |             |            |             |             |             |            |             |             |            |             |             |             |            |             |             |             |            |             |            |            |            |             |            |            |            |            |            |             |             |             |             |             |             |             |             |             |             |             |             |             |            |             |             |             |            |             |             |             |            |             |             |             |            |             |             |             |             |             |             |             |             |             |             |            |             |             |             |             |             |             |             |             |                                                                                                                                                                                                                                                                                                                                                                                                                                                                                                                                                                                                                                                                                                                                                                                                                                                                                                                                                                                                                                                                                                                                                                                                                                                                                                                                                                                                                                                                                                                                                                                                                                                                                                                                                                                                                                                                                                                                                                                                                                                                                                                                                                                                                                                                                                                                                                                                                                                                                                                                                                                                                                                                         |   |            |             |            |   |            |            |            |   |            |             |            |   |            |            |            |   |            |            |            |   |            |            |             |   |            |            |             |   |            |             |             |   |            |            |             |   |            |             |            |   |            |             |            |   |            |             |             |   |            |             |             |   |            |             |            |   |            |             |            |   |            |             |             |   |             |            |            |   |             |            |            |   |             |            |             |   |             |            |             |   |            |            |            |   |             |             |            |   |             |            |            |   |             |             |             |   |             |             |            |   |             |            |            |   |             |             |             |   |             |             |             |   |             |             |             |   |             |            |            |   |             |             |             |   |             |             |             |
| C                 | -0.15601900                                                                                                                                                                                                                                                                                                                                                                                                                                                                                                                                                                                                                                                                                                                                                                                                                                                                                                                                                                                                                                                                                                                                                                                                                                                                                                                                                                                                                                                                                                                                                                                                                                                                                                                                                                                                                                                                                                                                                                                                                                                                                                                                                                                                                                                                                                                                                                                                                  | 2.09635300                                                                          | -0.57427400                                                                           |             |             |   |             |             |             |   |             |             |             |   |             |             |             |   |             |             |             |   |             |            |             |   |             |             |             |   |             |             |             |   |             |             |             |   |             |             |             |   |             |             |             |   |             |             |            |   |             |             |             |   |             |             |             |   |             |             |             |   |             |             |             |   |             |             |             |   |             |             |             |                                                                                                                                                                                                                                                                                                                                                                                                                                                                                                                                                                                                                                                                                                                                                                                                                                                                                                                                                                                                                                                                                                                                                                                                                                                                                                                                                                                                                                                                                                                                                                                                                                                                                                                                                                           |            |             |             |            |            |             |             |            |            |            |            |             |            |             |             |             |            |             |             |             |            |             |             |            |            |             |             |            |            |             |            |            |            |             |             |            |            |            |            |            |            |            |            |                                                                                                                                                                                                                                                                                                                                                                                                                                                                                                                                                                                                                                                                                                                                                                                                                                                                                                                                                                                                                                                                                                                                                                                                                                                                                                                                                                                                                                                                                                                                                                                                                                                                                                                                                                                                                                                                                                                                                                                                                                                                                                                                                                                                                                                                                                                                                                                                                                                                                                                                                                                                                                                                            |   |            |             |             |   |            |             |             |   |            |             |            |   |            |             |            |   |            |             |            |   |            |             |             |   |             |             |             |   |             |             |             |   |             |             |             |   |             |             |             |                                                                                                                                                                                                                                                                                                                                                                                                                                                                                                                                                                                                                                                                                                                                                                                                                                                                                                                                                                                                                                                                                                                                                                                                                                                                                                                                                                                                                                                                                                                                                                                                                                                                                                                                                                            |            |             |             |            |            |             |             |            |            |             |             |             |            |            |            |             |            |             |             |             |            |             |             |            |             |             |             |            |             |             |             |            |             |            |            |            |             |            |            |            |            |            |             |             |             |             |             |             |             |             |             |             |             |             |             |            |             |             |             |            |             |             |             |            |             |             |             |            |             |             |             |             |             |             |             |             |             |             |            |             |             |             |             |             |             |             |             |                                                                                                                                                                                                                                                                                                                                                                                                                                                                                                                                                                                                                                                                                                                                                                                                                                                                                                                                                                                                                                                                                                                                                                                                                                                                                                                                                                                                                                                                                                                                                                                                                                                                                                                                                                                                                                                                                                                                                                                                                                                                                                                                                                                                                                                                                                                                                                                                                                                                                                                                                                                                                                                                         |   |            |             |            |   |            |            |            |   |            |             |            |   |            |            |            |   |            |            |            |   |            |            |             |   |            |            |             |   |            |             |             |   |            |            |             |   |            |             |            |   |            |             |            |   |            |             |             |   |            |             |             |   |            |             |            |   |            |             |            |   |            |             |             |   |             |            |            |   |             |            |            |   |             |            |             |   |             |            |             |   |            |            |            |   |             |             |            |   |             |            |            |   |             |             |             |   |             |             |            |   |             |            |            |   |             |             |             |   |             |             |             |   |             |             |             |   |             |            |            |   |             |             |             |   |             |             |             |
| O                 | -0.59397500                                                                                                                                                                                                                                                                                                                                                                                                                                                                                                                                                                                                                                                                                                                                                                                                                                                                                                                                                                                                                                                                                                                                                                                                                                                                                                                                                                                                                                                                                                                                                                                                                                                                                                                                                                                                                                                                                                                                                                                                                                                                                                                                                                                                                                                                                                                                                                                                                  | 1.81434400                                                                          | -1.62727500                                                                           |             |             |   |             |             |             |   |             |             |             |   |             |             |             |   |             |             |             |   |             |            |             |   |             |             |             |   |             |             |             |   |             |             |             |   |             |             |             |   |             |             |             |   |             |             |            |   |             |             |             |   |             |             |             |   |             |             |             |   |             |             |             |   |             |             |             |   |             |             |             |                                                                                                                                                                                                                                                                                                                                                                                                                                                                                                                                                                                                                                                                                                                                                                                                                                                                                                                                                                                                                                                                                                                                                                                                                                                                                                                                                                                                                                                                                                                                                                                                                                                                                                                                                                           |            |             |             |            |            |             |             |            |            |            |            |             |            |             |             |             |            |             |             |             |            |             |             |            |            |             |             |            |            |             |            |            |            |             |             |            |            |            |            |            |            |            |            |                                                                                                                                                                                                                                                                                                                                                                                                                                                                                                                                                                                                                                                                                                                                                                                                                                                                                                                                                                                                                                                                                                                                                                                                                                                                                                                                                                                                                                                                                                                                                                                                                                                                                                                                                                                                                                                                                                                                                                                                                                                                                                                                                                                                                                                                                                                                                                                                                                                                                                                                                                                                                                                                            |   |            |             |             |   |            |             |             |   |            |             |            |   |            |             |            |   |            |             |            |   |            |             |             |   |             |             |             |   |             |             |             |   |             |             |             |   |             |             |             |                                                                                                                                                                                                                                                                                                                                                                                                                                                                                                                                                                                                                                                                                                                                                                                                                                                                                                                                                                                                                                                                                                                                                                                                                                                                                                                                                                                                                                                                                                                                                                                                                                                                                                                                                                            |            |             |             |            |            |             |             |            |            |             |             |             |            |            |            |             |            |             |             |             |            |             |             |            |             |             |             |            |             |             |             |            |             |            |            |            |             |            |            |            |            |            |             |             |             |             |             |             |             |             |             |             |             |             |             |            |             |             |             |            |             |             |             |            |             |             |             |            |             |             |             |             |             |             |             |             |             |             |            |             |             |             |             |             |             |             |             |                                                                                                                                                                                                                                                                                                                                                                                                                                                                                                                                                                                                                                                                                                                                                                                                                                                                                                                                                                                                                                                                                                                                                                                                                                                                                                                                                                                                                                                                                                                                                                                                                                                                                                                                                                                                                                                                                                                                                                                                                                                                                                                                                                                                                                                                                                                                                                                                                                                                                                                                                                                                                                                                         |   |            |             |            |   |            |            |            |   |            |             |            |   |            |            |            |   |            |            |            |   |            |            |             |   |            |            |             |   |            |             |             |   |            |            |             |   |            |             |            |   |            |             |            |   |            |             |             |   |            |             |             |   |            |             |            |   |            |             |            |   |            |             |             |   |             |            |            |   |             |            |            |   |             |            |             |   |             |            |             |   |            |            |            |   |             |             |            |   |             |            |            |   |             |             |             |   |             |             |            |   |             |            |            |   |             |             |             |   |             |             |             |   |             |             |             |   |             |            |            |   |             |             |             |   |             |             |             |
| O                 | 0.33179700                                                                                                                                                                                                                                                                                                                                                                                                                                                                                                                                                                                                                                                                                                                                                                                                                                                                                                                                                                                                                                                                                                                                                                                                                                                                                                                                                                                                                                                                                                                                                                                                                                                                                                                                                                                                                                                                                                                                                                                                                                                                                                                                                                                                                                                                                                                                                                                                                   | 2.79731800                                                                          | 0.23551100                                                                            |             |             |   |             |             |             |   |             |             |             |   |             |             |             |   |             |             |             |   |             |            |             |   |             |             |             |   |             |             |             |   |             |             |             |   |             |             |             |   |             |             |             |   |             |             |            |   |             |             |             |   |             |             |             |   |             |             |             |   |             |             |             |   |             |             |             |   |             |             |             |                                                                                                                                                                                                                                                                                                                                                                                                                                                                                                                                                                                                                                                                                                                                                                                                                                                                                                                                                                                                                                                                                                                                                                                                                                                                                                                                                                                                                                                                                                                                                                                                                                                                                                                                                                           |            |             |             |            |            |             |             |            |            |            |            |             |            |             |             |             |            |             |             |             |            |             |             |            |            |             |             |            |            |             |            |            |            |             |             |            |            |            |            |            |            |            |            |                                                                                                                                                                                                                                                                                                                                                                                                                                                                                                                                                                                                                                                                                                                                                                                                                                                                                                                                                                                                                                                                                                                                                                                                                                                                                                                                                                                                                                                                                                                                                                                                                                                                                                                                                                                                                                                                                                                                                                                                                                                                                                                                                                                                                                                                                                                                                                                                                                                                                                                                                                                                                                                                            |   |            |             |             |   |            |             |             |   |            |             |            |   |            |             |            |   |            |             |            |   |            |             |             |   |             |             |             |   |             |             |             |   |             |             |             |   |             |             |             |                                                                                                                                                                                                                                                                                                                                                                                                                                                                                                                                                                                                                                                                                                                                                                                                                                                                                                                                                                                                                                                                                                                                                                                                                                                                                                                                                                                                                                                                                                                                                                                                                                                                                                                                                                            |            |             |             |            |            |             |             |            |            |             |             |             |            |            |            |             |            |             |             |             |            |             |             |            |             |             |             |            |             |             |             |            |             |            |            |            |             |            |            |            |            |            |             |             |             |             |             |             |             |             |             |             |             |             |             |            |             |             |             |            |             |             |             |            |             |             |             |            |             |             |             |             |             |             |             |             |             |             |            |             |             |             |             |             |             |             |             |                                                                                                                                                                                                                                                                                                                                                                                                                                                                                                                                                                                                                                                                                                                                                                                                                                                                                                                                                                                                                                                                                                                                                                                                                                                                                                                                                                                                                                                                                                                                                                                                                                                                                                                                                                                                                                                                                                                                                                                                                                                                                                                                                                                                                                                                                                                                                                                                                                                                                                                                                                                                                                                                         |   |            |             |            |   |            |            |            |   |            |             |            |   |            |            |            |   |            |            |            |   |            |            |             |   |            |            |             |   |            |             |             |   |            |            |             |   |            |             |            |   |            |             |            |   |            |             |             |   |            |             |             |   |            |             |            |   |            |             |            |   |            |             |             |   |             |            |            |   |             |            |            |   |             |            |             |   |             |            |             |   |            |            |            |   |             |             |            |   |             |            |            |   |             |             |             |   |             |             |            |   |             |            |            |   |             |             |             |   |             |             |             |   |             |             |             |   |             |            |            |   |             |             |             |   |             |             |             |
| C                 | -1.83646000                                                                                                                                                                                                                                                                                                                                                                                                                                                                                                                                                                                                                                                                                                                                                                                                                                                                                                                                                                                                                                                                                                                                                                                                                                                                                                                                                                                                                                                                                                                                                                                                                                                                                                                                                                                                                                                                                                                                                                                                                                                                                                                                                                                                                                                                                                                                                                                                                  | -0.21677800                                                                         | 0.41211400                                                                            |             |             |   |             |             |             |   |             |             |             |   |             |             |             |   |             |             |             |   |             |            |             |   |             |             |             |   |             |             |             |   |             |             |             |   |             |             |             |   |             |             |             |   |             |             |            |   |             |             |             |   |             |             |             |   |             |             |             |   |             |             |             |   |             |             |             |   |             |             |             |                                                                                                                                                                                                                                                                                                                                                                                                                                                                                                                                                                                                                                                                                                                                                                                                                                                                                                                                                                                                                                                                                                                                                                                                                                                                                                                                                                                                                                                                                                                                                                                                                                                                                                                                                                           |            |             |             |            |            |             |             |            |            |            |            |             |            |             |             |             |            |             |             |             |            |             |             |            |            |             |             |            |            |             |            |            |            |             |             |            |            |            |            |            |            |            |            |                                                                                                                                                                                                                                                                                                                                                                                                                                                                                                                                                                                                                                                                                                                                                                                                                                                                                                                                                                                                                                                                                                                                                                                                                                                                                                                                                                                                                                                                                                                                                                                                                                                                                                                                                                                                                                                                                                                                                                                                                                                                                                                                                                                                                                                                                                                                                                                                                                                                                                                                                                                                                                                                            |   |            |             |             |   |            |             |             |   |            |             |            |   |            |             |            |   |            |             |            |   |            |             |             |   |             |             |             |   |             |             |             |   |             |             |             |   |             |             |             |                                                                                                                                                                                                                                                                                                                                                                                                                                                                                                                                                                                                                                                                                                                                                                                                                                                                                                                                                                                                                                                                                                                                                                                                                                                                                                                                                                                                                                                                                                                                                                                                                                                                                                                                                                            |            |             |             |            |            |             |             |            |            |             |             |             |            |            |            |             |            |             |             |             |            |             |             |            |             |             |             |            |             |             |             |            |             |            |            |            |             |            |            |            |            |            |             |             |             |             |             |             |             |             |             |             |             |             |             |            |             |             |             |            |             |             |             |            |             |             |             |            |             |             |             |             |             |             |             |             |             |             |            |             |             |             |             |             |             |             |             |                                                                                                                                                                                                                                                                                                                                                                                                                                                                                                                                                                                                                                                                                                                                                                                                                                                                                                                                                                                                                                                                                                                                                                                                                                                                                                                                                                                                                                                                                                                                                                                                                                                                                                                                                                                                                                                                                                                                                                                                                                                                                                                                                                                                                                                                                                                                                                                                                                                                                                                                                                                                                                                                         |   |            |             |            |   |            |            |            |   |            |             |            |   |            |            |            |   |            |            |            |   |            |            |             |   |            |            |             |   |            |             |             |   |            |            |             |   |            |             |            |   |            |             |            |   |            |             |             |   |            |             |             |   |            |             |            |   |            |             |            |   |            |             |             |   |             |            |            |   |             |            |            |   |             |            |             |   |             |            |             |   |            |            |            |   |             |             |            |   |             |            |            |   |             |             |             |   |             |             |            |   |             |            |            |   |             |             |             |   |             |             |             |   |             |             |             |   |             |            |            |   |             |             |             |   |             |             |             |
| C                 | -2.82477600                                                                                                                                                                                                                                                                                                                                                                                                                                                                                                                                                                                                                                                                                                                                                                                                                                                                                                                                                                                                                                                                                                                                                                                                                                                                                                                                                                                                                                                                                                                                                                                                                                                                                                                                                                                                                                                                                                                                                                                                                                                                                                                                                                                                                                                                                                                                                                                                                  | 0.22364800                                                                          | 1.31514400                                                                            |             |             |   |             |             |             |   |             |             |             |   |             |             |             |   |             |             |             |   |             |            |             |   |             |             |             |   |             |             |             |   |             |             |             |   |             |             |             |   |             |             |             |   |             |             |            |   |             |             |             |   |             |             |             |   |             |             |             |   |             |             |             |   |             |             |             |   |             |             |             |                                                                                                                                                                                                                                                                                                                                                                                                                                                                                                                                                                                                                                                                                                                                                                                                                                                                                                                                                                                                                                                                                                                                                                                                                                                                                                                                                                                                                                                                                                                                                                                                                                                                                                                                                                           |            |             |             |            |            |             |             |            |            |            |            |             |            |             |             |             |            |             |             |             |            |             |             |            |            |             |             |            |            |             |            |            |            |             |             |            |            |            |            |            |            |            |            |                                                                                                                                                                                                                                                                                                                                                                                                                                                                                                                                                                                                                                                                                                                                                                                                                                                                                                                                                                                                                                                                                                                                                                                                                                                                                                                                                                                                                                                                                                                                                                                                                                                                                                                                                                                                                                                                                                                                                                                                                                                                                                                                                                                                                                                                                                                                                                                                                                                                                                                                                                                                                                                                            |   |            |             |             |   |            |             |             |   |            |             |            |   |            |             |            |   |            |             |            |   |            |             |             |   |             |             |             |   |             |             |             |   |             |             |             |   |             |             |             |                                                                                                                                                                                                                                                                                                                                                                                                                                                                                                                                                                                                                                                                                                                                                                                                                                                                                                                                                                                                                                                                                                                                                                                                                                                                                                                                                                                                                                                                                                                                                                                                                                                                                                                                                                            |            |             |             |            |            |             |             |            |            |             |             |             |            |            |            |             |            |             |             |             |            |             |             |            |             |             |             |            |             |             |             |            |             |            |            |            |             |            |            |            |            |            |             |             |             |             |             |             |             |             |             |             |             |             |             |            |             |             |             |            |             |             |             |            |             |             |             |            |             |             |             |             |             |             |             |             |             |             |            |             |             |             |             |             |             |             |             |                                                                                                                                                                                                                                                                                                                                                                                                                                                                                                                                                                                                                                                                                                                                                                                                                                                                                                                                                                                                                                                                                                                                                                                                                                                                                                                                                                                                                                                                                                                                                                                                                                                                                                                                                                                                                                                                                                                                                                                                                                                                                                                                                                                                                                                                                                                                                                                                                                                                                                                                                                                                                                                                         |   |            |             |            |   |            |            |            |   |            |             |            |   |            |            |            |   |            |            |            |   |            |            |             |   |            |            |             |   |            |             |             |   |            |            |             |   |            |             |            |   |            |             |            |   |            |             |             |   |            |             |             |   |            |             |            |   |            |             |            |   |            |             |             |   |             |            |            |   |             |            |            |   |             |            |             |   |             |            |             |   |            |            |            |   |             |             |            |   |             |            |            |   |             |             |             |   |             |             |            |   |             |            |            |   |             |             |             |   |             |             |             |   |             |             |             |   |             |            |            |   |             |             |             |   |             |             |             |
| C                 | -2.28912200                                                                                                                                                                                                                                                                                                                                                                                                                                                                                                                                                                                                                                                                                                                                                                                                                                                                                                                                                                                                                                                                                                                                                                                                                                                                                                                                                                                                                                                                                                                                                                                                                                                                                                                                                                                                                                                                                                                                                                                                                                                                                                                                                                                                                                                                                                                                                                                                                  | -0.92756300                                                                         | -0.71466100                                                                           |             |             |   |             |             |             |   |             |             |             |   |             |             |             |   |             |             |             |   |             |            |             |   |             |             |             |   |             |             |             |   |             |             |             |   |             |             |             |   |             |             |             |   |             |             |            |   |             |             |             |   |             |             |             |   |             |             |             |   |             |             |             |   |             |             |             |   |             |             |             |                                                                                                                                                                                                                                                                                                                                                                                                                                                                                                                                                                                                                                                                                                                                                                                                                                                                                                                                                                                                                                                                                                                                                                                                                                                                                                                                                                                                                                                                                                                                                                                                                                                                                                                                                                           |            |             |             |            |            |             |             |            |            |            |            |             |            |             |             |             |            |             |             |             |            |             |             |            |            |             |             |            |            |             |            |            |            |             |             |            |            |            |            |            |            |            |            |                                                                                                                                                                                                                                                                                                                                                                                                                                                                                                                                                                                                                                                                                                                                                                                                                                                                                                                                                                                                                                                                                                                                                                                                                                                                                                                                                                                                                                                                                                                                                                                                                                                                                                                                                                                                                                                                                                                                                                                                                                                                                                                                                                                                                                                                                                                                                                                                                                                                                                                                                                                                                                                                            |   |            |             |             |   |            |             |             |   |            |             |            |   |            |             |            |   |            |             |            |   |            |             |             |   |             |             |             |   |             |             |             |   |             |             |             |   |             |             |             |                                                                                                                                                                                                                                                                                                                                                                                                                                                                                                                                                                                                                                                                                                                                                                                                                                                                                                                                                                                                                                                                                                                                                                                                                                                                                                                                                                                                                                                                                                                                                                                                                                                                                                                                                                            |            |             |             |            |            |             |             |            |            |             |             |             |            |            |            |             |            |             |             |             |            |             |             |            |             |             |             |            |             |             |             |            |             |            |            |            |             |            |            |            |            |            |             |             |             |             |             |             |             |             |             |             |             |             |             |            |             |             |             |            |             |             |             |            |             |             |             |            |             |             |             |             |             |             |             |             |             |             |            |             |             |             |             |             |             |             |             |                                                                                                                                                                                                                                                                                                                                                                                                                                                                                                                                                                                                                                                                                                                                                                                                                                                                                                                                                                                                                                                                                                                                                                                                                                                                                                                                                                                                                                                                                                                                                                                                                                                                                                                                                                                                                                                                                                                                                                                                                                                                                                                                                                                                                                                                                                                                                                                                                                                                                                                                                                                                                                                                         |   |            |             |            |   |            |            |            |   |            |             |            |   |            |            |            |   |            |            |            |   |            |            |             |   |            |            |             |   |            |             |             |   |            |            |             |   |            |             |            |   |            |             |            |   |            |             |             |   |            |             |             |   |            |             |            |   |            |             |            |   |            |             |             |   |             |            |            |   |             |            |            |   |             |            |             |   |             |            |             |   |            |            |            |   |             |             |            |   |             |            |            |   |             |             |             |   |             |             |            |   |             |            |            |   |             |             |             |   |             |             |             |   |             |             |             |   |             |            |            |   |             |             |             |   |             |             |             |
| C                 | -4.16910000                                                                                                                                                                                                                                                                                                                                                                                                                                                                                                                                                                                                                                                                                                                                                                                                                                                                                                                                                                                                                                                                                                                                                                                                                                                                                                                                                                                                                                                                                                                                                                                                                                                                                                                                                                                                                                                                                                                                                                                                                                                                                                                                                                                                                                                                                                                                                                                                                  | -0.02907900                                                                         | 1.11181900                                                                            |             |             |   |             |             |             |   |             |             |             |   |             |             |             |   |             |             |             |   |             |            |             |   |             |             |             |   |             |             |             |   |             |             |             |   |             |             |             |   |             |             |             |   |             |             |            |   |             |             |             |   |             |             |             |   |             |             |             |   |             |             |             |   |             |             |             |   |             |             |             |                                                                                                                                                                                                                                                                                                                                                                                                                                                                                                                                                                                                                                                                                                                                                                                                                                                                                                                                                                                                                                                                                                                                                                                                                                                                                                                                                                                                                                                                                                                                                                                                                                                                                                                                                                           |            |             |             |            |            |             |             |            |            |            |            |             |            |             |             |             |            |             |             |             |            |             |             |            |            |             |             |            |            |             |            |            |            |             |             |            |            |            |            |            |            |            |            |                                                                                                                                                                                                                                                                                                                                                                                                                                                                                                                                                                                                                                                                                                                                                                                                                                                                                                                                                                                                                                                                                                                                                                                                                                                                                                                                                                                                                                                                                                                                                                                                                                                                                                                                                                                                                                                                                                                                                                                                                                                                                                                                                                                                                                                                                                                                                                                                                                                                                                                                                                                                                                                                            |   |            |             |             |   |            |             |             |   |            |             |            |   |            |             |            |   |            |             |            |   |            |             |             |   |             |             |             |   |             |             |             |   |             |             |             |   |             |             |             |                                                                                                                                                                                                                                                                                                                                                                                                                                                                                                                                                                                                                                                                                                                                                                                                                                                                                                                                                                                                                                                                                                                                                                                                                                                                                                                                                                                                                                                                                                                                                                                                                                                                                                                                                                            |            |             |             |            |            |             |             |            |            |             |             |             |            |            |            |             |            |             |             |             |            |             |             |            |             |             |             |            |             |             |             |            |             |            |            |            |             |            |            |            |            |            |             |             |             |             |             |             |             |             |             |             |             |             |             |            |             |             |             |            |             |             |             |            |             |             |             |            |             |             |             |             |             |             |             |             |             |             |            |             |             |             |             |             |             |             |             |                                                                                                                                                                                                                                                                                                                                                                                                                                                                                                                                                                                                                                                                                                                                                                                                                                                                                                                                                                                                                                                                                                                                                                                                                                                                                                                                                                                                                                                                                                                                                                                                                                                                                                                                                                                                                                                                                                                                                                                                                                                                                                                                                                                                                                                                                                                                                                                                                                                                                                                                                                                                                                                                         |   |            |             |            |   |            |            |            |   |            |             |            |   |            |            |            |   |            |            |            |   |            |            |             |   |            |            |             |   |            |             |             |   |            |            |             |   |            |             |            |   |            |             |            |   |            |             |             |   |            |             |             |   |            |             |            |   |            |             |            |   |            |             |             |   |             |            |            |   |             |            |            |   |             |            |             |   |             |            |             |   |            |            |            |   |             |             |            |   |             |            |            |   |             |             |             |   |             |             |            |   |             |            |            |   |             |             |             |   |             |             |             |   |             |             |             |   |             |            |            |   |             |             |             |   |             |             |             |
| H                 | -2.51596800                                                                                                                                                                                                                                                                                                                                                                                                                                                                                                                                                                                                                                                                                                                                                                                                                                                                                                                                                                                                                                                                                                                                                                                                                                                                                                                                                                                                                                                                                                                                                                                                                                                                                                                                                                                                                                                                                                                                                                                                                                                                                                                                                                                                                                                                                                                                                                                                                  | 0.77737300                                                                          | 2.19581800                                                                            |             |             |   |             |             |             |   |             |             |             |   |             |             |             |   |             |             |             |   |             |            |             |   |             |             |             |   |             |             |             |   |             |             |             |   |             |             |             |   |             |             |             |   |             |             |            |   |             |             |             |   |             |             |             |   |             |             |             |   |             |             |             |   |             |             |             |   |             |             |             |                                                                                                                                                                                                                                                                                                                                                                                                                                                                                                                                                                                                                                                                                                                                                                                                                                                                                                                                                                                                                                                                                                                                                                                                                                                                                                                                                                                                                                                                                                                                                                                                                                                                                                                                                                           |            |             |             |            |            |             |             |            |            |            |            |             |            |             |             |             |            |             |             |             |            |             |             |            |            |             |             |            |            |             |            |            |            |             |             |            |            |            |            |            |            |            |            |                                                                                                                                                                                                                                                                                                                                                                                                                                                                                                                                                                                                                                                                                                                                                                                                                                                                                                                                                                                                                                                                                                                                                                                                                                                                                                                                                                                                                                                                                                                                                                                                                                                                                                                                                                                                                                                                                                                                                                                                                                                                                                                                                                                                                                                                                                                                                                                                                                                                                                                                                                                                                                                                            |   |            |             |             |   |            |             |             |   |            |             |            |   |            |             |            |   |            |             |            |   |            |             |             |   |             |             |             |   |             |             |             |   |             |             |             |   |             |             |             |                                                                                                                                                                                                                                                                                                                                                                                                                                                                                                                                                                                                                                                                                                                                                                                                                                                                                                                                                                                                                                                                                                                                                                                                                                                                                                                                                                                                                                                                                                                                                                                                                                                                                                                                                                            |            |             |             |            |            |             |             |            |            |             |             |             |            |            |            |             |            |             |             |             |            |             |             |            |             |             |             |            |             |             |             |            |             |            |            |            |             |            |            |            |            |            |             |             |             |             |             |             |             |             |             |             |             |             |             |            |             |             |             |            |             |             |             |            |             |             |             |            |             |             |             |             |             |             |             |             |             |             |            |             |             |             |             |             |             |             |             |                                                                                                                                                                                                                                                                                                                                                                                                                                                                                                                                                                                                                                                                                                                                                                                                                                                                                                                                                                                                                                                                                                                                                                                                                                                                                                                                                                                                                                                                                                                                                                                                                                                                                                                                                                                                                                                                                                                                                                                                                                                                                                                                                                                                                                                                                                                                                                                                                                                                                                                                                                                                                                                                         |   |            |             |            |   |            |            |            |   |            |             |            |   |            |            |            |   |            |            |            |   |            |            |             |   |            |            |             |   |            |             |             |   |            |            |             |   |            |             |            |   |            |             |            |   |            |             |             |   |            |             |             |   |            |             |            |   |            |             |            |   |            |             |             |   |             |            |            |   |             |            |            |   |             |            |             |   |             |            |             |   |            |            |            |   |             |             |            |   |             |            |            |   |             |             |             |   |             |             |            |   |             |            |            |   |             |             |             |   |             |             |             |   |             |             |             |   |             |            |            |   |             |             |             |   |             |             |             |
| C                 | -3.63861500                                                                                                                                                                                                                                                                                                                                                                                                                                                                                                                                                                                                                                                                                                                                                                                                                                                                                                                                                                                                                                                                                                                                                                                                                                                                                                                                                                                                                                                                                                                                                                                                                                                                                                                                                                                                                                                                                                                                                                                                                                                                                                                                                                                                                                                                                                                                                                                                                  | -1.18120400                                                                         | -0.91170100                                                                           |             |             |   |             |             |             |   |             |             |             |   |             |             |             |   |             |             |             |   |             |            |             |   |             |             |             |   |             |             |             |   |             |             |             |   |             |             |             |   |             |             |             |   |             |             |            |   |             |             |             |   |             |             |             |   |             |             |             |   |             |             |             |   |             |             |             |   |             |             |             |                                                                                                                                                                                                                                                                                                                                                                                                                                                                                                                                                                                                                                                                                                                                                                                                                                                                                                                                                                                                                                                                                                                                                                                                                                                                                                                                                                                                                                                                                                                                                                                                                                                                                                                                                                           |            |             |             |            |            |             |             |            |            |            |            |             |            |             |             |             |            |             |             |             |            |             |             |            |            |             |             |            |            |             |            |            |            |             |             |            |            |            |            |            |            |            |            |                                                                                                                                                                                                                                                                                                                                                                                                                                                                                                                                                                                                                                                                                                                                                                                                                                                                                                                                                                                                                                                                                                                                                                                                                                                                                                                                                                                                                                                                                                                                                                                                                                                                                                                                                                                                                                                                                                                                                                                                                                                                                                                                                                                                                                                                                                                                                                                                                                                                                                                                                                                                                                                                            |   |            |             |             |   |            |             |             |   |            |             |            |   |            |             |            |   |            |             |            |   |            |             |             |   |             |             |             |   |             |             |             |   |             |             |             |   |             |             |             |                                                                                                                                                                                                                                                                                                                                                                                                                                                                                                                                                                                                                                                                                                                                                                                                                                                                                                                                                                                                                                                                                                                                                                                                                                                                                                                                                                                                                                                                                                                                                                                                                                                                                                                                                                            |            |             |             |            |            |             |             |            |            |             |             |             |            |            |            |             |            |             |             |             |            |             |             |            |             |             |             |            |             |             |             |            |             |            |            |            |             |            |            |            |            |            |             |             |             |             |             |             |             |             |             |             |             |             |             |            |             |             |             |            |             |             |             |            |             |             |             |            |             |             |             |             |             |             |             |             |             |             |            |             |             |             |             |             |             |             |             |                                                                                                                                                                                                                                                                                                                                                                                                                                                                                                                                                                                                                                                                                                                                                                                                                                                                                                                                                                                                                                                                                                                                                                                                                                                                                                                                                                                                                                                                                                                                                                                                                                                                                                                                                                                                                                                                                                                                                                                                                                                                                                                                                                                                                                                                                                                                                                                                                                                                                                                                                                                                                                                                         |   |            |             |            |   |            |            |            |   |            |             |            |   |            |            |            |   |            |            |            |   |            |            |             |   |            |            |             |   |            |             |             |   |            |            |             |   |            |             |            |   |            |             |            |   |            |             |             |   |            |             |             |   |            |             |            |   |            |             |            |   |            |             |             |   |             |            |            |   |             |            |            |   |             |            |             |   |             |            |             |   |            |            |            |   |             |             |            |   |             |            |            |   |             |             |             |   |             |             |            |   |             |            |            |   |             |             |             |   |             |             |             |   |             |             |             |   |             |            |            |   |             |             |             |   |             |             |             |
| H                 | -1.56136000                                                                                                                                                                                                                                                                                                                                                                                                                                                                                                                                                                                                                                                                                                                                                                                                                                                                                                                                                                                                                                                                                                                                                                                                                                                                                                                                                                                                                                                                                                                                                                                                                                                                                                                                                                                                                                                                                                                                                                                                                                                                                                                                                                                                                                                                                                                                                                                                                  | -1.27450700                                                                         | -1.43325200                                                                           |             |             |   |             |             |             |   |             |             |             |   |             |             |             |   |             |             |             |   |             |            |             |   |             |             |             |   |             |             |             |   |             |             |             |   |             |             |             |   |             |             |             |   |             |             |            |   |             |             |             |   |             |             |             |   |             |             |             |   |             |             |             |   |             |             |             |   |             |             |             |                                                                                                                                                                                                                                                                                                                                                                                                                                                                                                                                                                                                                                                                                                                                                                                                                                                                                                                                                                                                                                                                                                                                                                                                                                                                                                                                                                                                                                                                                                                                                                                                                                                                                                                                                                           |            |             |             |            |            |             |             |            |            |            |            |             |            |             |             |             |            |             |             |             |            |             |             |            |            |             |             |            |            |             |            |            |            |             |             |            |            |            |            |            |            |            |            |                                                                                                                                                                                                                                                                                                                                                                                                                                                                                                                                                                                                                                                                                                                                                                                                                                                                                                                                                                                                                                                                                                                                                                                                                                                                                                                                                                                                                                                                                                                                                                                                                                                                                                                                                                                                                                                                                                                                                                                                                                                                                                                                                                                                                                                                                                                                                                                                                                                                                                                                                                                                                                                                            |   |            |             |             |   |            |             |             |   |            |             |            |   |            |             |            |   |            |             |            |   |            |             |             |   |             |             |             |   |             |             |             |   |             |             |             |   |             |             |             |                                                                                                                                                                                                                                                                                                                                                                                                                                                                                                                                                                                                                                                                                                                                                                                                                                                                                                                                                                                                                                                                                                                                                                                                                                                                                                                                                                                                                                                                                                                                                                                                                                                                                                                                                                            |            |             |             |            |            |             |             |            |            |             |             |             |            |            |            |             |            |             |             |             |            |             |             |            |             |             |             |            |             |             |             |            |             |            |            |            |             |            |            |            |            |            |             |             |             |             |             |             |             |             |             |             |             |             |             |            |             |             |             |            |             |             |             |            |             |             |             |            |             |             |             |             |             |             |             |             |             |             |            |             |             |             |             |             |             |             |             |                                                                                                                                                                                                                                                                                                                                                                                                                                                                                                                                                                                                                                                                                                                                                                                                                                                                                                                                                                                                                                                                                                                                                                                                                                                                                                                                                                                                                                                                                                                                                                                                                                                                                                                                                                                                                                                                                                                                                                                                                                                                                                                                                                                                                                                                                                                                                                                                                                                                                                                                                                                                                                                                         |   |            |             |            |   |            |            |            |   |            |             |            |   |            |            |            |   |            |            |            |   |            |            |             |   |            |            |             |   |            |             |             |   |            |            |             |   |            |             |            |   |            |             |            |   |            |             |             |   |            |             |             |   |            |             |            |   |            |             |            |   |            |             |             |   |             |            |            |   |             |            |            |   |             |            |             |   |             |            |             |   |            |            |            |   |             |             |            |   |             |            |            |   |             |             |             |   |             |             |            |   |             |            |            |   |             |             |             |   |             |             |             |   |             |             |             |   |             |            |            |   |             |             |             |   |             |             |             |
| C                 | -4.59423100                                                                                                                                                                                                                                                                                                                                                                                                                                                                                                                                                                                                                                                                                                                                                                                                                                                                                                                                                                                                                                                                                                                                                                                                                                                                                                                                                                                                                                                                                                                                                                                                                                                                                                                                                                                                                                                                                                                                                                                                                                                                                                                                                                                                                                                                                                                                                                                                                  | -0.73809100                                                                         | -0.00712400                                                                           |             |             |   |             |             |             |   |             |             |             |   |             |             |             |   |             |             |             |   |             |            |             |   |             |             |             |   |             |             |             |   |             |             |             |   |             |             |             |   |             |             |             |   |             |             |            |   |             |             |             |   |             |             |             |   |             |             |             |   |             |             |             |   |             |             |             |   |             |             |             |                                                                                                                                                                                                                                                                                                                                                                                                                                                                                                                                                                                                                                                                                                                                                                                                                                                                                                                                                                                                                                                                                                                                                                                                                                                                                                                                                                                                                                                                                                                                                                                                                                                                                                                                                                           |            |             |             |            |            |             |             |            |            |            |            |             |            |             |             |             |            |             |             |             |            |             |             |            |            |             |             |            |            |             |            |            |            |             |             |            |            |            |            |            |            |            |            |                                                                                                                                                                                                                                                                                                                                                                                                                                                                                                                                                                                                                                                                                                                                                                                                                                                                                                                                                                                                                                                                                                                                                                                                                                                                                                                                                                                                                                                                                                                                                                                                                                                                                                                                                                                                                                                                                                                                                                                                                                                                                                                                                                                                                                                                                                                                                                                                                                                                                                                                                                                                                                                                            |   |            |             |             |   |            |             |             |   |            |             |            |   |            |             |            |   |            |             |            |   |            |             |             |   |             |             |             |   |             |             |             |   |             |             |             |   |             |             |             |                                                                                                                                                                                                                                                                                                                                                                                                                                                                                                                                                                                                                                                                                                                                                                                                                                                                                                                                                                                                                                                                                                                                                                                                                                                                                                                                                                                                                                                                                                                                                                                                                                                                                                                                                                            |            |             |             |            |            |             |             |            |            |             |             |             |            |            |            |             |            |             |             |             |            |             |             |            |             |             |             |            |             |             |             |            |             |            |            |            |             |            |            |            |            |            |             |             |             |             |             |             |             |             |             |             |             |             |             |            |             |             |             |            |             |             |             |            |             |             |             |            |             |             |             |             |             |             |             |             |             |             |            |             |             |             |             |             |             |             |             |                                                                                                                                                                                                                                                                                                                                                                                                                                                                                                                                                                                                                                                                                                                                                                                                                                                                                                                                                                                                                                                                                                                                                                                                                                                                                                                                                                                                                                                                                                                                                                                                                                                                                                                                                                                                                                                                                                                                                                                                                                                                                                                                                                                                                                                                                                                                                                                                                                                                                                                                                                                                                                                                         |   |            |             |            |   |            |            |            |   |            |             |            |   |            |            |            |   |            |            |            |   |            |            |             |   |            |            |             |   |            |             |             |   |            |            |             |   |            |             |            |   |            |             |            |   |            |             |             |   |            |             |             |   |            |             |            |   |            |             |            |   |            |             |             |   |             |            |            |   |             |            |            |   |             |            |             |   |             |            |             |   |            |            |            |   |             |             |            |   |             |            |            |   |             |             |             |   |             |             |            |   |             |            |            |   |             |             |             |   |             |             |             |   |             |             |             |   |             |            |            |   |             |             |             |   |             |             |             |
| H                 | -4.89397500                                                                                                                                                                                                                                                                                                                                                                                                                                                                                                                                                                                                                                                                                                                                                                                                                                                                                                                                                                                                                                                                                                                                                                                                                                                                                                                                                                                                                                                                                                                                                                                                                                                                                                                                                                                                                                                                                                                                                                                                                                                                                                                                                                                                                                                                                                                                                                                                                  | 0.32836100                                                                          | 1.83456000                                                                            |             |             |   |             |             |             |   |             |             |             |   |             |             |             |   |             |             |             |   |             |            |             |   |             |             |             |   |             |             |             |   |             |             |             |   |             |             |             |   |             |             |             |   |             |             |            |   |             |             |             |   |             |             |             |   |             |             |             |   |             |             |             |   |             |             |             |   |             |             |             |                                                                                                                                                                                                                                                                                                                                                                                                                                                                                                                                                                                                                                                                                                                                                                                                                                                                                                                                                                                                                                                                                                                                                                                                                                                                                                                                                                                                                                                                                                                                                                                                                                                                                                                                                                           |            |             |             |            |            |             |             |            |            |            |            |             |            |             |             |             |            |             |             |             |            |             |             |            |            |             |             |            |            |             |            |            |            |             |             |            |            |            |            |            |            |            |            |                                                                                                                                                                                                                                                                                                                                                                                                                                                                                                                                                                                                                                                                                                                                                                                                                                                                                                                                                                                                                                                                                                                                                                                                                                                                                                                                                                                                                                                                                                                                                                                                                                                                                                                                                                                                                                                                                                                                                                                                                                                                                                                                                                                                                                                                                                                                                                                                                                                                                                                                                                                                                                                                            |   |            |             |             |   |            |             |             |   |            |             |            |   |            |             |            |   |            |             |            |   |            |             |             |   |             |             |             |   |             |             |             |   |             |             |             |   |             |             |             |                                                                                                                                                                                                                                                                                                                                                                                                                                                                                                                                                                                                                                                                                                                                                                                                                                                                                                                                                                                                                                                                                                                                                                                                                                                                                                                                                                                                                                                                                                                                                                                                                                                                                                                                                                            |            |             |             |            |            |             |             |            |            |             |             |             |            |            |            |             |            |             |             |             |            |             |             |            |             |             |             |            |             |             |             |            |             |            |            |            |             |            |            |            |            |            |             |             |             |             |             |             |             |             |             |             |             |             |             |            |             |             |             |            |             |             |             |            |             |             |             |            |             |             |             |             |             |             |             |             |             |             |            |             |             |             |             |             |             |             |             |                                                                                                                                                                                                                                                                                                                                                                                                                                                                                                                                                                                                                                                                                                                                                                                                                                                                                                                                                                                                                                                                                                                                                                                                                                                                                                                                                                                                                                                                                                                                                                                                                                                                                                                                                                                                                                                                                                                                                                                                                                                                                                                                                                                                                                                                                                                                                                                                                                                                                                                                                                                                                                                                         |   |            |             |            |   |            |            |            |   |            |             |            |   |            |            |            |   |            |            |            |   |            |            |             |   |            |            |             |   |            |             |             |   |            |            |             |   |            |             |            |   |            |             |            |   |            |             |             |   |            |             |             |   |            |             |            |   |            |             |            |   |            |             |             |   |             |            |            |   |             |            |            |   |             |            |             |   |             |            |             |   |            |            |            |   |             |             |            |   |             |            |            |   |             |             |             |   |             |             |            |   |             |            |            |   |             |             |             |   |             |             |             |   |             |             |             |   |             |            |            |   |             |             |             |   |             |             |             |
| H                 | -3.94810800                                                                                                                                                                                                                                                                                                                                                                                                                                                                                                                                                                                                                                                                                                                                                                                                                                                                                                                                                                                                                                                                                                                                                                                                                                                                                                                                                                                                                                                                                                                                                                                                                                                                                                                                                                                                                                                                                                                                                                                                                                                                                                                                                                                                                                                                                                                                                                                                                  | -1.73347500                                                                         | -1.79234800                                                                           |             |             |   |             |             |             |   |             |             |             |   |             |             |             |   |             |             |             |   |             |            |             |   |             |             |             |   |             |             |             |   |             |             |             |   |             |             |             |   |             |             |             |   |             |             |            |   |             |             |             |   |             |             |             |   |             |             |             |   |             |             |             |   |             |             |             |   |             |             |             |                                                                                                                                                                                                                                                                                                                                                                                                                                                                                                                                                                                                                                                                                                                                                                                                                                                                                                                                                                                                                                                                                                                                                                                                                                                                                                                                                                                                                                                                                                                                                                                                                                                                                                                                                                           |            |             |             |            |            |             |             |            |            |            |            |             |            |             |             |             |            |             |             |             |            |             |             |            |            |             |             |            |            |             |            |            |            |             |             |            |            |            |            |            |            |            |            |                                                                                                                                                                                                                                                                                                                                                                                                                                                                                                                                                                                                                                                                                                                                                                                                                                                                                                                                                                                                                                                                                                                                                                                                                                                                                                                                                                                                                                                                                                                                                                                                                                                                                                                                                                                                                                                                                                                                                                                                                                                                                                                                                                                                                                                                                                                                                                                                                                                                                                                                                                                                                                                                            |   |            |             |             |   |            |             |             |   |            |             |            |   |            |             |            |   |            |             |            |   |            |             |             |   |             |             |             |   |             |             |             |   |             |             |             |   |             |             |             |                                                                                                                                                                                                                                                                                                                                                                                                                                                                                                                                                                                                                                                                                                                                                                                                                                                                                                                                                                                                                                                                                                                                                                                                                                                                                                                                                                                                                                                                                                                                                                                                                                                                                                                                                                            |            |             |             |            |            |             |             |            |            |             |             |             |            |            |            |             |            |             |             |             |            |             |             |            |             |             |             |            |             |             |             |            |             |            |            |            |             |            |            |            |            |            |             |             |             |             |             |             |             |             |             |             |             |             |             |            |             |             |             |            |             |             |             |            |             |             |             |            |             |             |             |             |             |             |             |             |             |             |            |             |             |             |             |             |             |             |             |                                                                                                                                                                                                                                                                                                                                                                                                                                                                                                                                                                                                                                                                                                                                                                                                                                                                                                                                                                                                                                                                                                                                                                                                                                                                                                                                                                                                                                                                                                                                                                                                                                                                                                                                                                                                                                                                                                                                                                                                                                                                                                                                                                                                                                                                                                                                                                                                                                                                                                                                                                                                                                                                         |   |            |             |            |   |            |            |            |   |            |             |            |   |            |            |            |   |            |            |            |   |            |            |             |   |            |            |             |   |            |             |             |   |            |            |             |   |            |             |            |   |            |             |            |   |            |             |             |   |            |             |             |   |            |             |            |   |            |             |            |   |            |             |             |   |             |            |            |   |             |            |            |   |             |            |             |   |             |            |             |   |            |            |            |   |             |             |            |   |             |            |            |   |             |             |             |   |             |             |            |   |             |            |            |   |             |             |             |   |             |             |             |   |             |             |             |   |             |            |            |   |             |             |             |   |             |             |             |
| H                 | -5.64600400                                                                                                                                                                                                                                                                                                                                                                                                                                                                                                                                                                                                                                                                                                                                                                                                                                                                                                                                                                                                                                                                                                                                                                                                                                                                                                                                                                                                                                                                                                                                                                                                                                                                                                                                                                                                                                                                                                                                                                                                                                                                                                                                                                                                                                                                                                                                                                                                                  | -0.93863400                                                                         | -0.16848000                                                                           |             |             |   |             |             |             |   |             |             |             |   |             |             |             |   |             |             |             |   |             |            |             |   |             |             |             |   |             |             |             |   |             |             |             |   |             |             |             |   |             |             |             |   |             |             |            |   |             |             |             |   |             |             |             |   |             |             |             |   |             |             |             |   |             |             |             |   |             |             |             |                                                                                                                                                                                                                                                                                                                                                                                                                                                                                                                                                                                                                                                                                                                                                                                                                                                                                                                                                                                                                                                                                                                                                                                                                                                                                                                                                                                                                                                                                                                                                                                                                                                                                                                                                                           |            |             |             |            |            |             |             |            |            |            |            |             |            |             |             |             |            |             |             |             |            |             |             |            |            |             |             |            |            |             |            |            |            |             |             |            |            |            |            |            |            |            |            |                                                                                                                                                                                                                                                                                                                                                                                                                                                                                                                                                                                                                                                                                                                                                                                                                                                                                                                                                                                                                                                                                                                                                                                                                                                                                                                                                                                                                                                                                                                                                                                                                                                                                                                                                                                                                                                                                                                                                                                                                                                                                                                                                                                                                                                                                                                                                                                                                                                                                                                                                                                                                                                                            |   |            |             |             |   |            |             |             |   |            |             |            |   |            |             |            |   |            |             |            |   |            |             |             |   |             |             |             |   |             |             |             |   |             |             |             |   |             |             |             |                                                                                                                                                                                                                                                                                                                                                                                                                                                                                                                                                                                                                                                                                                                                                                                                                                                                                                                                                                                                                                                                                                                                                                                                                                                                                                                                                                                                                                                                                                                                                                                                                                                                                                                                                                            |            |             |             |            |            |             |             |            |            |             |             |             |            |            |            |             |            |             |             |             |            |             |             |            |             |             |             |            |             |             |             |            |             |            |            |            |             |            |            |            |            |            |             |             |             |             |             |             |             |             |             |             |             |             |             |            |             |             |             |            |             |             |             |            |             |             |             |            |             |             |             |             |             |             |             |             |             |             |            |             |             |             |             |             |             |             |             |                                                                                                                                                                                                                                                                                                                                                                                                                                                                                                                                                                                                                                                                                                                                                                                                                                                                                                                                                                                                                                                                                                                                                                                                                                                                                                                                                                                                                                                                                                                                                                                                                                                                                                                                                                                                                                                                                                                                                                                                                                                                                                                                                                                                                                                                                                                                                                                                                                                                                                                                                                                                                                                                         |   |            |             |            |   |            |            |            |   |            |             |            |   |            |            |            |   |            |            |            |   |            |            |             |   |            |            |             |   |            |             |             |   |            |            |             |   |            |             |            |   |            |             |            |   |            |             |             |   |            |             |             |   |            |             |            |   |            |             |            |   |            |             |             |   |             |            |            |   |             |            |            |   |             |            |             |   |             |            |             |   |            |            |            |   |             |             |            |   |             |            |            |   |             |             |             |   |             |             |            |   |             |            |            |   |             |             |             |   |             |             |             |   |             |             |             |   |             |            |            |   |             |             |             |   |             |             |             |
| 23 C <sub>1</sub> |                                                                                                                                                                                                                                                                                                                                                                                                                                                                                                                                                                                                                                                                                                                                                                                                                                                                                                                                                                                                                                                                                                                                                                                                                                                                                                                                                                                                                                                                                                                                                                                                                                                                                                                                                                                                                                                                                                                                                                                                                                                                                                                                                                                                                                                                                                                                           |  |  |             |             |   |             |             |             |   |             |             |             |   |             |             |             |   |             |             |             |   |             |            |             |   |             |             |             |   |             |             |             |   |             |             |             |   |             |             |             |   |             |             |             |   |             |             |            |   |             |             |             |   |             |             |             |   |             |             |             |   |             |             |             |   |             |             |             |   |             |             |             |                                                                                                                                                                                                                                                                                                                                                                                                                                                                                                                                                                                                                                                                                                                                                                                                                                                                                                                                                                                                                                                                                                                                                                                                                                                                                                                                                                                                                                                                                                                                                                                                                                                                                                                                                                           |            |             |             |            |            |             |             |            |            |            |            |             |            |             |             |             |            |             |             |             |            |             |             |            |            |             |             |            |            |             |            |            |            |             |             |            |            |            |            |            |            |            |            |                                                                                                                                                                                                                                                                                                                                                                                                                                                                                                                                                                                                                                                                                                                                                                                                                                                                                                                                                                                                                                                                                                                                                                                                                                                                                                                                                                                                                                                                                                                                                                                                                                                                                                                                                                                                                                                                                                                                                                                                                                                                                                                                                                                                                                                                                                                                                                                                                                                                                                                                                                                                                                                                            |   |            |             |             |   |            |             |             |   |            |             |            |   |            |             |            |   |            |             |            |   |            |             |             |   |             |             |             |   |             |             |             |   |             |             |             |   |             |             |             |                                                                                                                                                                                                                                                                                                                                                                                                                                                                                                                                                                                                                                                                                                                                                                                                                                                                                                                                                                                                                                                                                                                                                                                                                                                                                                                                                                                                                                                                                                                                                                                                                                                                                                                                                                            |            |             |             |            |            |             |             |            |            |             |             |             |            |            |            |             |            |             |             |             |            |             |             |            |             |             |             |            |             |             |             |            |             |            |            |            |             |            |            |            |            |            |             |             |             |             |             |             |             |             |             |             |             |             |             |            |             |             |             |            |             |             |             |            |             |             |             |            |             |             |             |             |             |             |             |             |             |             |            |             |             |             |             |             |             |             |             |                                                                                                                                                                                                                                                                                                                                                                                                                                                                                                                                                                                                                                                                                                                                                                                                                                                                                                                                                                                                                                                                                                                                                                                                                                                                                                                                                                                                                                                                                                                                                                                                                                                                                                                                                                                                                                                                                                                                                                                                                                                                                                                                                                                                                                                                                                                                                                                                                                                                                                                                                                                                                                                                         |   |            |             |            |   |            |            |            |   |            |             |            |   |            |            |            |   |            |            |            |   |            |            |             |   |            |            |             |   |            |             |             |   |            |            |             |   |            |             |            |   |            |             |            |   |            |             |             |   |            |             |             |   |            |             |            |   |            |             |            |   |            |             |             |   |             |            |            |   |             |            |            |   |             |            |             |   |             |            |             |   |            |            |            |   |             |             |            |   |             |            |            |   |             |             |             |   |             |             |            |   |             |            |            |   |             |             |             |   |             |             |             |   |             |             |             |   |             |            |            |   |             |             |             |   |             |             |             |
|                   | <p>-11</p> <table border="1"> <tbody> <tr><td>C</td><td>0.19403000</td><td>0.21135000</td><td>0.00130000</td></tr> <tr><td>O</td><td>0.17802500</td><td>1.44148700</td><td>0.00356600</td></tr> <tr><td>C</td><td>1.40498300</td><td>-0.44497500</td><td>-0.00079900</td></tr> <tr><td>O</td><td>2.57238900</td><td>0.36438200</td><td>0.00275700</td></tr> <tr><td>H</td><td>2.57508300</td><td>1.01650200</td><td>-0.87426900</td></tr> <tr><td>H</td><td>2.57654900</td><td>1.00629700</td><td>0.88735400</td></tr> <tr><td>C</td><td>-2.25576300</td><td>-0.38795400</td><td>-0.00069900</td></tr> <tr><td>O</td><td>-3.14710100</td><td>-1.26758300</td><td>0.00222200</td></tr> <tr><td>C</td><td>-2.70423200</td><td>1.06446500</td><td>-0.00508000</td></tr> <tr><td>H</td><td>-2.29292400</td><td>1.60138000</td><td>-0.86043800</td></tr> <tr><td>H</td><td>-3.79289300</td><td>1.09676600</td><td>-0.03562000</td></tr> <tr><td>H</td><td>-2.34617600</td><td>1.58613100</td><td>0.88371500</td></tr> <tr><td>C</td><td>3.77390800</td><td>-0.55271100</td><td>-0.00360300</td></tr> <tr><td>H</td><td>3.77722900</td><td>-1.18436800</td><td>-0.89329800</td></tr> <tr><td>H</td><td>4.69062100</td><td>0.03903500</td><td>-0.00014200</td></tr> <tr><td>H</td><td>3.77796500</td><td>-1.19590500</td><td>0.87777400</td></tr> <tr><td>C</td><td>-0.88425700</td><td>-0.70595900</td><td>0.00075200</td></tr> <tr><td>H</td><td>-0.62915900</td><td>-1.75870200</td><td>0.00244100</td></tr> </tbody> </table>                                                                                                                                                                                                                                                                                                                                                                                                                                                                                                                                                                                                                                                                                                                                                                                                                                                                                                   | C                                                                                   | 0.19403000                                                                            | 0.21135000  | 0.00130000  | O | 0.17802500  | 1.44148700  | 0.00356600  | C | 1.40498300  | -0.44497500 | -0.00079900 | O | 2.57238900  | 0.36438200  | 0.00275700  | H | 2.57508300  | 1.01650200  | -0.87426900 | H | 2.57654900  | 1.00629700 | 0.88735400  | C | -2.25576300 | -0.38795400 | -0.00069900 | O | -3.14710100 | -1.26758300 | 0.00222200  | C | -2.70423200 | 1.06446500  | -0.00508000 | H | -2.29292400 | 1.60138000  | -0.86043800 | H | -3.79289300 | 1.09676600  | -0.03562000 | H | -2.34617600 | 1.58613100  | 0.88371500 | C | 3.77390800  | -0.55271100 | -0.00360300 | H | 3.77722900  | -1.18436800 | -0.89329800 | H | 4.69062100  | 0.03903500  | -0.00014200 | H | 3.77796500  | -1.19590500 | 0.87777400  | C | -0.88425700 | -0.70595900 | 0.00075200  | H | -0.62915900 | -1.75870200 | 0.00244100  | <p>-11</p> <table border="1"> <tbody> <tr><td>C</td><td>-0.57313900</td><td>-0.40540000</td><td>0.26809400</td></tr> <tr><td>O</td><td>-0.57557600</td><td>-0.97485300</td><td>1.33285700</td></tr> <tr><td>C</td><td>0.64538200</td><td>0.05626200</td><td>-0.48219200</td></tr> <tr><td>H</td><td>0.39009900</td><td>0.17037500</td><td>-1.53510500</td></tr> <tr><td>O</td><td>-1.68514800</td><td>-0.09172800</td><td>-0.39436300</td></tr> <tr><td>C</td><td>-2.93193800</td><td>-0.38955600</td><td>0.25324100</td></tr> <tr><td>H</td><td>-2.98285400</td><td>-1.46252600</td><td>0.44378800</td></tr> <tr><td>H</td><td>-2.95851500</td><td>0.12769500</td><td>1.21353500</td></tr> <tr><td>C</td><td>1.09407800</td><td>1.49002900</td><td>0.02414800</td></tr> <tr><td>O</td><td>0.29697000</td><td>2.09849000</td><td>0.75418000</td></tr> <tr><td>O</td><td>2.20787000</td><td>1.84919500</td><td>-0.39228900</td></tr> <tr><td>C</td><td>1.83168900</td><td>-0.88676800</td><td>-0.40651400</td></tr> <tr><td>O</td><td>2.31500800</td><td>-1.33321700</td><td>-1.42346100</td></tr> <tr><td>C</td><td>2.39680800</td><td>-1.22920600</td><td>0.94368300</td></tr> <tr><td>H</td><td>1.78013000</td><td>-2.01373300</td><td>1.38575500</td></tr> <tr><td>H</td><td>3.41721000</td><td>-1.59035900</td><td>0.83291200</td></tr> <tr><td>H</td><td>2.36234200</td><td>-0.37654200</td><td>1.62039200</td></tr> <tr><td>C</td><td>-4.04434600</td><td>0.06796400</td><td>-0.65651200</td></tr> <tr><td>H</td><td>-4.00680600</td><td>-0.45557300</td><td>-1.61240500</td></tr> <tr><td>H</td><td>-5.00566700</td><td>-0.14313000</td><td>-0.18689800</td></tr> <tr><td>H</td><td>-3.98012800</td><td>1.14075000</td><td>-0.84107200</td></tr> </tbody> </table> | C          | -0.57313900 | -0.40540000 | 0.26809400 | O          | -0.57557600 | -0.97485300 | 1.33285700 | C          | 0.64538200 | 0.05626200 | -0.48219200 | H          | 0.39009900  | 0.17037500  | -1.53510500 | O          | -1.68514800 | -0.09172800 | -0.39436300 | C          | -2.93193800 | -0.38955600 | 0.25324100 | H          | -2.98285400 | -1.46252600 | 0.44378800 | H          | -2.95851500 | 0.12769500 | 1.21353500 | C          | 1.09407800  | 1.49002900  | 0.02414800 | O          | 0.29697000 | 2.09849000 | 0.75418000 | O          | 2.20787000 | 1.84919500 | -0.39228900                                                                                                                                                                                                                                                                                                                                                                                                                                                                                                                                                                                                                                                                                                                                                                                                                                                                                                                                                                                                                                                                                                                                                                                                                                                                                                                                                                                                                                                                                                                                                                                                                                                                                                                                                                                                                                                                                                                                                                                                                                                                                                                                                                                                                                                                                                                                                                                                                                                                                                                                                                                                                                                                | C | 1.83168900 | -0.88676800 | -0.40651400 | O | 2.31500800 | -1.33321700 | -1.42346100 | C | 2.39680800 | -1.22920600 | 0.94368300 | H | 1.78013000 | -2.01373300 | 1.38575500 | H | 3.41721000 | -1.59035900 | 0.83291200 | H | 2.36234200 | -0.37654200 | 1.62039200  | C | -4.04434600 | 0.06796400  | -0.65651200 | H | -4.00680600 | -0.45557300 | -1.61240500 | H | -5.00566700 | -0.14313000 | -0.18689800 | H | -3.98012800 | 1.14075000  | -0.84107200 | <p>-11</p> <table border="1"> <tbody> <tr><td>C</td><td>-0.56174000</td><td>-0.61757500</td><td>0.06384700</td></tr> <tr><td>O</td><td>-0.62105400</td><td>-1.35306400</td><td>1.03434800</td></tr> <tr><td>C</td><td>0.60468600</td><td>-0.15715300</td><td>-0.64600200</td></tr> <tr><td>H</td><td>0.39785000</td><td>0.31662700</td><td>-1.59645200</td></tr> <tr><td>O</td><td>-1.69198500</td><td>-0.07794500</td><td>-0.46835300</td></tr> <tr><td>C</td><td>-2.92483900</td><td>-0.40753400</td><td>0.16818100</td></tr> <tr><td>H</td><td>-3.06839100</td><td>-1.49005200</td><td>0.14604000</td></tr> <tr><td>H</td><td>-2.88752000</td><td>-0.09901200</td><td>1.21513000</td></tr> <tr><td>C</td><td>1.06751500</td><td>1.68293900</td><td>0.44618900</td></tr> <tr><td>O</td><td>0.84469500</td><td>1.45785700</td><td>1.58669800</td></tr> <tr><td>O</td><td>1.41522500</td><td>2.41603100</td><td>-0.41551900</td></tr> <tr><td>C</td><td>1.90055500</td><td>-0.77098400</td><td>-0.55810100</td></tr> <tr><td>O</td><td>2.75628400</td><td>-0.58611300</td><td>-1.43261900</td></tr> <tr><td>C</td><td>2.25764800</td><td>-1.62002400</td><td>0.64169300</td></tr> <tr><td>H</td><td>1.72154200</td><td>-2.56963600</td><td>0.59632500</td></tr> <tr><td>H</td><td>3.33020800</td><td>-1.80842300</td><td>0.63638300</td></tr> <tr><td>H</td><td>1.95808900</td><td>-1.13707600</td><td>1.57073600</td></tr> <tr><td>C</td><td>-4.03182900</td><td>0.30475100</td><td>-0.57223400</td></tr> <tr><td>H</td><td>-4.06828600</td><td>-0.01066100</td><td>-1.61592500</td></tr> <tr><td>H</td><td>-4.99192200</td><td>0.07185100</td><td>-0.10972500</td></tr> <tr><td>H</td><td>-3.88886600</td><td>1.38573300</td><td>-0.54039800</td></tr> </tbody> </table> | C          | -0.56174000 | -0.61757500 | 0.06384700 | O          | -0.62105400 | -1.35306400 | 1.03434800 | C          | 0.60468600  | -0.15715300 | -0.64600200 | H          | 0.39785000 | 0.31662700 | -1.59645200 | O          | -1.69198500 | -0.07794500 | -0.46835300 | C          | -2.92483900 | -0.40753400 | 0.16818100 | H           | -3.06839100 | -1.49005200 | 0.14604000 | H           | -2.88752000 | -0.09901200 | 1.21513000 | C           | 1.06751500 | 1.68293900 | 0.44618900 | O           | 0.84469500 | 1.45785700 | 1.58669800 | O          | 1.41522500 | 2.41603100  | -0.41551900 | C           | 1.90055500  | -0.77098400 | -0.55810100 | O           | 2.75628400  | -0.58611300 | -1.43261900 | C           | 2.25764800  | -1.62002400 | 0.64169300 | H           | 1.72154200  | -2.56963600 | 0.59632500 | H           | 3.33020800  | -1.80842300 | 0.63638300 | H           | 1.95808900  | -1.13707600 | 1.57073600 | C           | -4.03182900 | 0.30475100  | -0.57223400 | H           | -4.06828600 | -0.01066100 | -1.61592500 | H           | -4.99192200 | 0.07185100 | -0.10972500 | H           | -3.88886600 | 1.38573300  | -0.54039800 |             |             |             |                                                                                                                                                                                                                                                                                                                                                                                                                                                                                                                                                                                                                                                                                                                                                                                                                                                                                                                                                                                                                                                                                                                                                                                                                                                                                                                                                                                                                                                                                                                                                                                                                                                                                                                                                                                                                                                                                                                                                                                                                                                                                                                                                                                                                                                                                                                                                                                                                                                                                                                                                                                                                                                                         |   |            |             |            |   |            |            |            |   |            |             |            |   |            |            |            |   |            |            |            |   |            |            |             |   |            |            |             |   |            |             |             |   |            |            |             |   |            |             |            |   |            |             |            |   |            |             |             |   |            |             |             |   |            |             |            |   |            |             |            |   |            |             |             |   |             |            |            |   |             |            |            |   |             |            |             |   |             |            |             |   |            |            |            |   |             |             |            |   |             |            |            |   |             |             |             |   |             |             |            |   |             |            |            |   |             |             |             |   |             |             |             |   |             |             |             |   |             |            |            |   |             |             |             |   |             |             |             |
| C                 | 0.19403000                                                                                                                                                                                                                                                                                                                                                                                                                                                                                                                                                                                                                                                                                                                                                                                                                                                                                                                                                                                                                                                                                                                                                                                                                                                                                                                                                                                                                                                                                                                                                                                                                                                                                                                                                                                                                                                                                                                                                                                                                                                                                                                                                                                                                                                                                                                                                                                                                   | 0.21135000                                                                          | 0.00130000                                                                            |             |             |   |             |             |             |   |             |             |             |   |             |             |             |   |             |             |             |   |             |            |             |   |             |             |             |   |             |             |             |   |             |             |             |   |             |             |             |   |             |             |             |   |             |             |            |   |             |             |             |   |             |             |             |   |             |             |             |   |             |             |             |   |             |             |             |   |             |             |             |                                                                                                                                                                                                                                                                                                                                                                                                                                                                                                                                                                                                                                                                                                                                                                                                                                                                                                                                                                                                                                                                                                                                                                                                                                                                                                                                                                                                                                                                                                                                                                                                                                                                                                                                                                           |            |             |             |            |            |             |             |            |            |            |            |             |            |             |             |             |            |             |             |             |            |             |             |            |            |             |             |            |            |             |            |            |            |             |             |            |            |            |            |            |            |            |            |                                                                                                                                                                                                                                                                                                                                                                                                                                                                                                                                                                                                                                                                                                                                                                                                                                                                                                                                                                                                                                                                                                                                                                                                                                                                                                                                                                                                                                                                                                                                                                                                                                                                                                                                                                                                                                                                                                                                                                                                                                                                                                                                                                                                                                                                                                                                                                                                                                                                                                                                                                                                                                                                            |   |            |             |             |   |            |             |             |   |            |             |            |   |            |             |            |   |            |             |            |   |            |             |             |   |             |             |             |   |             |             |             |   |             |             |             |   |             |             |             |                                                                                                                                                                                                                                                                                                                                                                                                                                                                                                                                                                                                                                                                                                                                                                                                                                                                                                                                                                                                                                                                                                                                                                                                                                                                                                                                                                                                                                                                                                                                                                                                                                                                                                                                                                            |            |             |             |            |            |             |             |            |            |             |             |             |            |            |            |             |            |             |             |             |            |             |             |            |             |             |             |            |             |             |             |            |             |            |            |            |             |            |            |            |            |            |             |             |             |             |             |             |             |             |             |             |             |             |             |            |             |             |             |            |             |             |             |            |             |             |             |            |             |             |             |             |             |             |             |             |             |             |            |             |             |             |             |             |             |             |             |                                                                                                                                                                                                                                                                                                                                                                                                                                                                                                                                                                                                                                                                                                                                                                                                                                                                                                                                                                                                                                                                                                                                                                                                                                                                                                                                                                                                                                                                                                                                                                                                                                                                                                                                                                                                                                                                                                                                                                                                                                                                                                                                                                                                                                                                                                                                                                                                                                                                                                                                                                                                                                                                         |   |            |             |            |   |            |            |            |   |            |             |            |   |            |            |            |   |            |            |            |   |            |            |             |   |            |            |             |   |            |             |             |   |            |            |             |   |            |             |            |   |            |             |            |   |            |             |             |   |            |             |             |   |            |             |            |   |            |             |            |   |            |             |             |   |             |            |            |   |             |            |            |   |             |            |             |   |             |            |             |   |            |            |            |   |             |             |            |   |             |            |            |   |             |             |             |   |             |             |            |   |             |            |            |   |             |             |             |   |             |             |             |   |             |             |             |   |             |            |            |   |             |             |             |   |             |             |             |
| O                 | 0.17802500                                                                                                                                                                                                                                                                                                                                                                                                                                                                                                                                                                                                                                                                                                                                                                                                                                                                                                                                                                                                                                                                                                                                                                                                                                                                                                                                                                                                                                                                                                                                                                                                                                                                                                                                                                                                                                                                                                                                                                                                                                                                                                                                                                                                                                                                                                                                                                                                                   | 1.44148700                                                                          | 0.00356600                                                                            |             |             |   |             |             |             |   |             |             |             |   |             |             |             |   |             |             |             |   |             |            |             |   |             |             |             |   |             |             |             |   |             |             |             |   |             |             |             |   |             |             |             |   |             |             |            |   |             |             |             |   |             |             |             |   |             |             |             |   |             |             |             |   |             |             |             |   |             |             |             |                                                                                                                                                                                                                                                                                                                                                                                                                                                                                                                                                                                                                                                                                                                                                                                                                                                                                                                                                                                                                                                                                                                                                                                                                                                                                                                                                                                                                                                                                                                                                                                                                                                                                                                                                                           |            |             |             |            |            |             |             |            |            |            |            |             |            |             |             |             |            |             |             |             |            |             |             |            |            |             |             |            |            |             |            |            |            |             |             |            |            |            |            |            |            |            |            |                                                                                                                                                                                                                                                                                                                                                                                                                                                                                                                                                                                                                                                                                                                                                                                                                                                                                                                                                                                                                                                                                                                                                                                                                                                                                                                                                                                                                                                                                                                                                                                                                                                                                                                                                                                                                                                                                                                                                                                                                                                                                                                                                                                                                                                                                                                                                                                                                                                                                                                                                                                                                                                                            |   |            |             |             |   |            |             |             |   |            |             |            |   |            |             |            |   |            |             |            |   |            |             |             |   |             |             |             |   |             |             |             |   |             |             |             |   |             |             |             |                                                                                                                                                                                                                                                                                                                                                                                                                                                                                                                                                                                                                                                                                                                                                                                                                                                                                                                                                                                                                                                                                                                                                                                                                                                                                                                                                                                                                                                                                                                                                                                                                                                                                                                                                                            |            |             |             |            |            |             |             |            |            |             |             |             |            |            |            |             |            |             |             |             |            |             |             |            |             |             |             |            |             |             |             |            |             |            |            |            |             |            |            |            |            |            |             |             |             |             |             |             |             |             |             |             |             |             |             |            |             |             |             |            |             |             |             |            |             |             |             |            |             |             |             |             |             |             |             |             |             |             |            |             |             |             |             |             |             |             |             |                                                                                                                                                                                                                                                                                                                                                                                                                                                                                                                                                                                                                                                                                                                                                                                                                                                                                                                                                                                                                                                                                                                                                                                                                                                                                                                                                                                                                                                                                                                                                                                                                                                                                                                                                                                                                                                                                                                                                                                                                                                                                                                                                                                                                                                                                                                                                                                                                                                                                                                                                                                                                                                                         |   |            |             |            |   |            |            |            |   |            |             |            |   |            |            |            |   |            |            |            |   |            |            |             |   |            |            |             |   |            |             |             |   |            |            |             |   |            |             |            |   |            |             |            |   |            |             |             |   |            |             |             |   |            |             |            |   |            |             |            |   |            |             |             |   |             |            |            |   |             |            |            |   |             |            |             |   |             |            |             |   |            |            |            |   |             |             |            |   |             |            |            |   |             |             |             |   |             |             |            |   |             |            |            |   |             |             |             |   |             |             |             |   |             |             |             |   |             |            |            |   |             |             |             |   |             |             |             |
| C                 | 1.40498300                                                                                                                                                                                                                                                                                                                                                                                                                                                                                                                                                                                                                                                                                                                                                                                                                                                                                                                                                                                                                                                                                                                                                                                                                                                                                                                                                                                                                                                                                                                                                                                                                                                                                                                                                                                                                                                                                                                                                                                                                                                                                                                                                                                                                                                                                                                                                                                                                   | -0.44497500                                                                         | -0.00079900                                                                           |             |             |   |             |             |             |   |             |             |             |   |             |             |             |   |             |             |             |   |             |            |             |   |             |             |             |   |             |             |             |   |             |             |             |   |             |             |             |   |             |             |             |   |             |             |            |   |             |             |             |   |             |             |             |   |             |             |             |   |             |             |             |   |             |             |             |   |             |             |             |                                                                                                                                                                                                                                                                                                                                                                                                                                                                                                                                                                                                                                                                                                                                                                                                                                                                                                                                                                                                                                                                                                                                                                                                                                                                                                                                                                                                                                                                                                                                                                                                                                                                                                                                                                           |            |             |             |            |            |             |             |            |            |            |            |             |            |             |             |             |            |             |             |             |            |             |             |            |            |             |             |            |            |             |            |            |            |             |             |            |            |            |            |            |            |            |            |                                                                                                                                                                                                                                                                                                                                                                                                                                                                                                                                                                                                                                                                                                                                                                                                                                                                                                                                                                                                                                                                                                                                                                                                                                                                                                                                                                                                                                                                                                                                                                                                                                                                                                                                                                                                                                                                                                                                                                                                                                                                                                                                                                                                                                                                                                                                                                                                                                                                                                                                                                                                                                                                            |   |            |             |             |   |            |             |             |   |            |             |            |   |            |             |            |   |            |             |            |   |            |             |             |   |             |             |             |   |             |             |             |   |             |             |             |   |             |             |             |                                                                                                                                                                                                                                                                                                                                                                                                                                                                                                                                                                                                                                                                                                                                                                                                                                                                                                                                                                                                                                                                                                                                                                                                                                                                                                                                                                                                                                                                                                                                                                                                                                                                                                                                                                            |            |             |             |            |            |             |             |            |            |             |             |             |            |            |            |             |            |             |             |             |            |             |             |            |             |             |             |            |             |             |             |            |             |            |            |            |             |            |            |            |            |            |             |             |             |             |             |             |             |             |             |             |             |             |             |            |             |             |             |            |             |             |             |            |             |             |             |            |             |             |             |             |             |             |             |             |             |             |            |             |             |             |             |             |             |             |             |                                                                                                                                                                                                                                                                                                                                                                                                                                                                                                                                                                                                                                                                                                                                                                                                                                                                                                                                                                                                                                                                                                                                                                                                                                                                                                                                                                                                                                                                                                                                                                                                                                                                                                                                                                                                                                                                                                                                                                                                                                                                                                                                                                                                                                                                                                                                                                                                                                                                                                                                                                                                                                                                         |   |            |             |            |   |            |            |            |   |            |             |            |   |            |            |            |   |            |            |            |   |            |            |             |   |            |            |             |   |            |             |             |   |            |            |             |   |            |             |            |   |            |             |            |   |            |             |             |   |            |             |             |   |            |             |            |   |            |             |            |   |            |             |             |   |             |            |            |   |             |            |            |   |             |            |             |   |             |            |             |   |            |            |            |   |             |             |            |   |             |            |            |   |             |             |             |   |             |             |            |   |             |            |            |   |             |             |             |   |             |             |             |   |             |             |             |   |             |            |            |   |             |             |             |   |             |             |             |
| O                 | 2.57238900                                                                                                                                                                                                                                                                                                                                                                                                                                                                                                                                                                                                                                                                                                                                                                                                                                                                                                                                                                                                                                                                                                                                                                                                                                                                                                                                                                                                                                                                                                                                                                                                                                                                                                                                                                                                                                                                                                                                                                                                                                                                                                                                                                                                                                                                                                                                                                                                                   | 0.36438200                                                                          | 0.00275700                                                                            |             |             |   |             |             |             |   |             |             |             |   |             |             |             |   |             |             |             |   |             |            |             |   |             |             |             |   |             |             |             |   |             |             |             |   |             |             |             |   |             |             |             |   |             |             |            |   |             |             |             |   |             |             |             |   |             |             |             |   |             |             |             |   |             |             |             |   |             |             |             |                                                                                                                                                                                                                                                                                                                                                                                                                                                                                                                                                                                                                                                                                                                                                                                                                                                                                                                                                                                                                                                                                                                                                                                                                                                                                                                                                                                                                                                                                                                                                                                                                                                                                                                                                                           |            |             |             |            |            |             |             |            |            |            |            |             |            |             |             |             |            |             |             |             |            |             |             |            |            |             |             |            |            |             |            |            |            |             |             |            |            |            |            |            |            |            |            |                                                                                                                                                                                                                                                                                                                                                                                                                                                                                                                                                                                                                                                                                                                                                                                                                                                                                                                                                                                                                                                                                                                                                                                                                                                                                                                                                                                                                                                                                                                                                                                                                                                                                                                                                                                                                                                                                                                                                                                                                                                                                                                                                                                                                                                                                                                                                                                                                                                                                                                                                                                                                                                                            |   |            |             |             |   |            |             |             |   |            |             |            |   |            |             |            |   |            |             |            |   |            |             |             |   |             |             |             |   |             |             |             |   |             |             |             |   |             |             |             |                                                                                                                                                                                                                                                                                                                                                                                                                                                                                                                                                                                                                                                                                                                                                                                                                                                                                                                                                                                                                                                                                                                                                                                                                                                                                                                                                                                                                                                                                                                                                                                                                                                                                                                                                                            |            |             |             |            |            |             |             |            |            |             |             |             |            |            |            |             |            |             |             |             |            |             |             |            |             |             |             |            |             |             |             |            |             |            |            |            |             |            |            |            |            |            |             |             |             |             |             |             |             |             |             |             |             |             |             |            |             |             |             |            |             |             |             |            |             |             |             |            |             |             |             |             |             |             |             |             |             |             |            |             |             |             |             |             |             |             |             |                                                                                                                                                                                                                                                                                                                                                                                                                                                                                                                                                                                                                                                                                                                                                                                                                                                                                                                                                                                                                                                                                                                                                                                                                                                                                                                                                                                                                                                                                                                                                                                                                                                                                                                                                                                                                                                                                                                                                                                                                                                                                                                                                                                                                                                                                                                                                                                                                                                                                                                                                                                                                                                                         |   |            |             |            |   |            |            |            |   |            |             |            |   |            |            |            |   |            |            |            |   |            |            |             |   |            |            |             |   |            |             |             |   |            |            |             |   |            |             |            |   |            |             |            |   |            |             |             |   |            |             |             |   |            |             |            |   |            |             |            |   |            |             |             |   |             |            |            |   |             |            |            |   |             |            |             |   |             |            |             |   |            |            |            |   |             |             |            |   |             |            |            |   |             |             |             |   |             |             |            |   |             |            |            |   |             |             |             |   |             |             |             |   |             |             |             |   |             |            |            |   |             |             |             |   |             |             |             |
| H                 | 2.57508300                                                                                                                                                                                                                                                                                                                                                                                                                                                                                                                                                                                                                                                                                                                                                                                                                                                                                                                                                                                                                                                                                                                                                                                                                                                                                                                                                                                                                                                                                                                                                                                                                                                                                                                                                                                                                                                                                                                                                                                                                                                                                                                                                                                                                                                                                                                                                                                                                   | 1.01650200                                                                          | -0.87426900                                                                           |             |             |   |             |             |             |   |             |             |             |   |             |             |             |   |             |             |             |   |             |            |             |   |             |             |             |   |             |             |             |   |             |             |             |   |             |             |             |   |             |             |             |   |             |             |            |   |             |             |             |   |             |             |             |   |             |             |             |   |             |             |             |   |             |             |             |   |             |             |             |                                                                                                                                                                                                                                                                                                                                                                                                                                                                                                                                                                                                                                                                                                                                                                                                                                                                                                                                                                                                                                                                                                                                                                                                                                                                                                                                                                                                                                                                                                                                                                                                                                                                                                                                                                           |            |             |             |            |            |             |             |            |            |            |            |             |            |             |             |             |            |             |             |             |            |             |             |            |            |             |             |            |            |             |            |            |            |             |             |            |            |            |            |            |            |            |            |                                                                                                                                                                                                                                                                                                                                                                                                                                                                                                                                                                                                                                                                                                                                                                                                                                                                                                                                                                                                                                                                                                                                                                                                                                                                                                                                                                                                                                                                                                                                                                                                                                                                                                                                                                                                                                                                                                                                                                                                                                                                                                                                                                                                                                                                                                                                                                                                                                                                                                                                                                                                                                                                            |   |            |             |             |   |            |             |             |   |            |             |            |   |            |             |            |   |            |             |            |   |            |             |             |   |             |             |             |   |             |             |             |   |             |             |             |   |             |             |             |                                                                                                                                                                                                                                                                                                                                                                                                                                                                                                                                                                                                                                                                                                                                                                                                                                                                                                                                                                                                                                                                                                                                                                                                                                                                                                                                                                                                                                                                                                                                                                                                                                                                                                                                                                            |            |             |             |            |            |             |             |            |            |             |             |             |            |            |            |             |            |             |             |             |            |             |             |            |             |             |             |            |             |             |             |            |             |            |            |            |             |            |            |            |            |            |             |             |             |             |             |             |             |             |             |             |             |             |             |            |             |             |             |            |             |             |             |            |             |             |             |            |             |             |             |             |             |             |             |             |             |             |            |             |             |             |             |             |             |             |             |                                                                                                                                                                                                                                                                                                                                                                                                                                                                                                                                                                                                                                                                                                                                                                                                                                                                                                                                                                                                                                                                                                                                                                                                                                                                                                                                                                                                                                                                                                                                                                                                                                                                                                                                                                                                                                                                                                                                                                                                                                                                                                                                                                                                                                                                                                                                                                                                                                                                                                                                                                                                                                                                         |   |            |             |            |   |            |            |            |   |            |             |            |   |            |            |            |   |            |            |            |   |            |            |             |   |            |            |             |   |            |             |             |   |            |            |             |   |            |             |            |   |            |             |            |   |            |             |             |   |            |             |             |   |            |             |            |   |            |             |            |   |            |             |             |   |             |            |            |   |             |            |            |   |             |            |             |   |             |            |             |   |            |            |            |   |             |             |            |   |             |            |            |   |             |             |             |   |             |             |            |   |             |            |            |   |             |             |             |   |             |             |             |   |             |             |             |   |             |            |            |   |             |             |             |   |             |             |             |
| H                 | 2.57654900                                                                                                                                                                                                                                                                                                                                                                                                                                                                                                                                                                                                                                                                                                                                                                                                                                                                                                                                                                                                                                                                                                                                                                                                                                                                                                                                                                                                                                                                                                                                                                                                                                                                                                                                                                                                                                                                                                                                                                                                                                                                                                                                                                                                                                                                                                                                                                                                                   | 1.00629700                                                                          | 0.88735400                                                                            |             |             |   |             |             |             |   |             |             |             |   |             |             |             |   |             |             |             |   |             |            |             |   |             |             |             |   |             |             |             |   |             |             |             |   |             |             |             |   |             |             |             |   |             |             |            |   |             |             |             |   |             |             |             |   |             |             |             |   |             |             |             |   |             |             |             |   |             |             |             |                                                                                                                                                                                                                                                                                                                                                                                                                                                                                                                                                                                                                                                                                                                                                                                                                                                                                                                                                                                                                                                                                                                                                                                                                                                                                                                                                                                                                                                                                                                                                                                                                                                                                                                                                                           |            |             |             |            |            |             |             |            |            |            |            |             |            |             |             |             |            |             |             |             |            |             |             |            |            |             |             |            |            |             |            |            |            |             |             |            |            |            |            |            |            |            |            |                                                                                                                                                                                                                                                                                                                                                                                                                                                                                                                                                                                                                                                                                                                                                                                                                                                                                                                                                                                                                                                                                                                                                                                                                                                                                                                                                                                                                                                                                                                                                                                                                                                                                                                                                                                                                                                                                                                                                                                                                                                                                                                                                                                                                                                                                                                                                                                                                                                                                                                                                                                                                                                                            |   |            |             |             |   |            |             |             |   |            |             |            |   |            |             |            |   |            |             |            |   |            |             |             |   |             |             |             |   |             |             |             |   |             |             |             |   |             |             |             |                                                                                                                                                                                                                                                                                                                                                                                                                                                                                                                                                                                                                                                                                                                                                                                                                                                                                                                                                                                                                                                                                                                                                                                                                                                                                                                                                                                                                                                                                                                                                                                                                                                                                                                                                                            |            |             |             |            |            |             |             |            |            |             |             |             |            |            |            |             |            |             |             |             |            |             |             |            |             |             |             |            |             |             |             |            |             |            |            |            |             |            |            |            |            |            |             |             |             |             |             |             |             |             |             |             |             |             |             |            |             |             |             |            |             |             |             |            |             |             |             |            |             |             |             |             |             |             |             |             |             |             |            |             |             |             |             |             |             |             |             |                                                                                                                                                                                                                                                                                                                                                                                                                                                                                                                                                                                                                                                                                                                                                                                                                                                                                                                                                                                                                                                                                                                                                                                                                                                                                                                                                                                                                                                                                                                                                                                                                                                                                                                                                                                                                                                                                                                                                                                                                                                                                                                                                                                                                                                                                                                                                                                                                                                                                                                                                                                                                                                                         |   |            |             |            |   |            |            |            |   |            |             |            |   |            |            |            |   |            |            |            |   |            |            |             |   |            |            |             |   |            |             |             |   |            |            |             |   |            |             |            |   |            |             |            |   |            |             |             |   |            |             |             |   |            |             |            |   |            |             |            |   |            |             |             |   |             |            |            |   |             |            |            |   |             |            |             |   |             |            |             |   |            |            |            |   |             |             |            |   |             |            |            |   |             |             |             |   |             |             |            |   |             |            |            |   |             |             |             |   |             |             |             |   |             |             |             |   |             |            |            |   |             |             |             |   |             |             |             |
| C                 | -2.25576300                                                                                                                                                                                                                                                                                                                                                                                                                                                                                                                                                                                                                                                                                                                                                                                                                                                                                                                                                                                                                                                                                                                                                                                                                                                                                                                                                                                                                                                                                                                                                                                                                                                                                                                                                                                                                                                                                                                                                                                                                                                                                                                                                                                                                                                                                                                                                                                                                  | -0.38795400                                                                         | -0.00069900                                                                           |             |             |   |             |             |             |   |             |             |             |   |             |             |             |   |             |             |             |   |             |            |             |   |             |             |             |   |             |             |             |   |             |             |             |   |             |             |             |   |             |             |             |   |             |             |            |   |             |             |             |   |             |             |             |   |             |             |             |   |             |             |             |   |             |             |             |   |             |             |             |                                                                                                                                                                                                                                                                                                                                                                                                                                                                                                                                                                                                                                                                                                                                                                                                                                                                                                                                                                                                                                                                                                                                                                                                                                                                                                                                                                                                                                                                                                                                                                                                                                                                                                                                                                           |            |             |             |            |            |             |             |            |            |            |            |             |            |             |             |             |            |             |             |             |            |             |             |            |            |             |             |            |            |             |            |            |            |             |             |            |            |            |            |            |            |            |            |                                                                                                                                                                                                                                                                                                                                                                                                                                                                                                                                                                                                                                                                                                                                                                                                                                                                                                                                                                                                                                                                                                                                                                                                                                                                                                                                                                                                                                                                                                                                                                                                                                                                                                                                                                                                                                                                                                                                                                                                                                                                                                                                                                                                                                                                                                                                                                                                                                                                                                                                                                                                                                                                            |   |            |             |             |   |            |             |             |   |            |             |            |   |            |             |            |   |            |             |            |   |            |             |             |   |             |             |             |   |             |             |             |   |             |             |             |   |             |             |             |                                                                                                                                                                                                                                                                                                                                                                                                                                                                                                                                                                                                                                                                                                                                                                                                                                                                                                                                                                                                                                                                                                                                                                                                                                                                                                                                                                                                                                                                                                                                                                                                                                                                                                                                                                            |            |             |             |            |            |             |             |            |            |             |             |             |            |            |            |             |            |             |             |             |            |             |             |            |             |             |             |            |             |             |             |            |             |            |            |            |             |            |            |            |            |            |             |             |             |             |             |             |             |             |             |             |             |             |             |            |             |             |             |            |             |             |             |            |             |             |             |            |             |             |             |             |             |             |             |             |             |             |            |             |             |             |             |             |             |             |             |                                                                                                                                                                                                                                                                                                                                                                                                                                                                                                                                                                                                                                                                                                                                                                                                                                                                                                                                                                                                                                                                                                                                                                                                                                                                                                                                                                                                                                                                                                                                                                                                                                                                                                                                                                                                                                                                                                                                                                                                                                                                                                                                                                                                                                                                                                                                                                                                                                                                                                                                                                                                                                                                         |   |            |             |            |   |            |            |            |   |            |             |            |   |            |            |            |   |            |            |            |   |            |            |             |   |            |            |             |   |            |             |             |   |            |            |             |   |            |             |            |   |            |             |            |   |            |             |             |   |            |             |             |   |            |             |            |   |            |             |            |   |            |             |             |   |             |            |            |   |             |            |            |   |             |            |             |   |             |            |             |   |            |            |            |   |             |             |            |   |             |            |            |   |             |             |             |   |             |             |            |   |             |            |            |   |             |             |             |   |             |             |             |   |             |             |             |   |             |            |            |   |             |             |             |   |             |             |             |
| O                 | -3.14710100                                                                                                                                                                                                                                                                                                                                                                                                                                                                                                                                                                                                                                                                                                                                                                                                                                                                                                                                                                                                                                                                                                                                                                                                                                                                                                                                                                                                                                                                                                                                                                                                                                                                                                                                                                                                                                                                                                                                                                                                                                                                                                                                                                                                                                                                                                                                                                                                                  | -1.26758300                                                                         | 0.00222200                                                                            |             |             |   |             |             |             |   |             |             |             |   |             |             |             |   |             |             |             |   |             |            |             |   |             |             |             |   |             |             |             |   |             |             |             |   |             |             |             |   |             |             |             |   |             |             |            |   |             |             |             |   |             |             |             |   |             |             |             |   |             |             |             |   |             |             |             |   |             |             |             |                                                                                                                                                                                                                                                                                                                                                                                                                                                                                                                                                                                                                                                                                                                                                                                                                                                                                                                                                                                                                                                                                                                                                                                                                                                                                                                                                                                                                                                                                                                                                                                                                                                                                                                                                                           |            |             |             |            |            |             |             |            |            |            |            |             |            |             |             |             |            |             |             |             |            |             |             |            |            |             |             |            |            |             |            |            |            |             |             |            |            |            |            |            |            |            |            |                                                                                                                                                                                                                                                                                                                                                                                                                                                                                                                                                                                                                                                                                                                                                                                                                                                                                                                                                                                                                                                                                                                                                                                                                                                                                                                                                                                                                                                                                                                                                                                                                                                                                                                                                                                                                                                                                                                                                                                                                                                                                                                                                                                                                                                                                                                                                                                                                                                                                                                                                                                                                                                                            |   |            |             |             |   |            |             |             |   |            |             |            |   |            |             |            |   |            |             |            |   |            |             |             |   |             |             |             |   |             |             |             |   |             |             |             |   |             |             |             |                                                                                                                                                                                                                                                                                                                                                                                                                                                                                                                                                                                                                                                                                                                                                                                                                                                                                                                                                                                                                                                                                                                                                                                                                                                                                                                                                                                                                                                                                                                                                                                                                                                                                                                                                                            |            |             |             |            |            |             |             |            |            |             |             |             |            |            |            |             |            |             |             |             |            |             |             |            |             |             |             |            |             |             |             |            |             |            |            |            |             |            |            |            |            |            |             |             |             |             |             |             |             |             |             |             |             |             |             |            |             |             |             |            |             |             |             |            |             |             |             |            |             |             |             |             |             |             |             |             |             |             |            |             |             |             |             |             |             |             |             |                                                                                                                                                                                                                                                                                                                                                                                                                                                                                                                                                                                                                                                                                                                                                                                                                                                                                                                                                                                                                                                                                                                                                                                                                                                                                                                                                                                                                                                                                                                                                                                                                                                                                                                                                                                                                                                                                                                                                                                                                                                                                                                                                                                                                                                                                                                                                                                                                                                                                                                                                                                                                                                                         |   |            |             |            |   |            |            |            |   |            |             |            |   |            |            |            |   |            |            |            |   |            |            |             |   |            |            |             |   |            |             |             |   |            |            |             |   |            |             |            |   |            |             |            |   |            |             |             |   |            |             |             |   |            |             |            |   |            |             |            |   |            |             |             |   |             |            |            |   |             |            |            |   |             |            |             |   |             |            |             |   |            |            |            |   |             |             |            |   |             |            |            |   |             |             |             |   |             |             |            |   |             |            |            |   |             |             |             |   |             |             |             |   |             |             |             |   |             |            |            |   |             |             |             |   |             |             |             |
| C                 | -2.70423200                                                                                                                                                                                                                                                                                                                                                                                                                                                                                                                                                                                                                                                                                                                                                                                                                                                                                                                                                                                                                                                                                                                                                                                                                                                                                                                                                                                                                                                                                                                                                                                                                                                                                                                                                                                                                                                                                                                                                                                                                                                                                                                                                                                                                                                                                                                                                                                                                  | 1.06446500                                                                          | -0.00508000                                                                           |             |             |   |             |             |             |   |             |             |             |   |             |             |             |   |             |             |             |   |             |            |             |   |             |             |             |   |             |             |             |   |             |             |             |   |             |             |             |   |             |             |             |   |             |             |            |   |             |             |             |   |             |             |             |   |             |             |             |   |             |             |             |   |             |             |             |   |             |             |             |                                                                                                                                                                                                                                                                                                                                                                                                                                                                                                                                                                                                                                                                                                                                                                                                                                                                                                                                                                                                                                                                                                                                                                                                                                                                                                                                                                                                                                                                                                                                                                                                                                                                                                                                                                           |            |             |             |            |            |             |             |            |            |            |            |             |            |             |             |             |            |             |             |             |            |             |             |            |            |             |             |            |            |             |            |            |            |             |             |            |            |            |            |            |            |            |            |                                                                                                                                                                                                                                                                                                                                                                                                                                                                                                                                                                                                                                                                                                                                                                                                                                                                                                                                                                                                                                                                                                                                                                                                                                                                                                                                                                                                                                                                                                                                                                                                                                                                                                                                                                                                                                                                                                                                                                                                                                                                                                                                                                                                                                                                                                                                                                                                                                                                                                                                                                                                                                                                            |   |            |             |             |   |            |             |             |   |            |             |            |   |            |             |            |   |            |             |            |   |            |             |             |   |             |             |             |   |             |             |             |   |             |             |             |   |             |             |             |                                                                                                                                                                                                                                                                                                                                                                                                                                                                                                                                                                                                                                                                                                                                                                                                                                                                                                                                                                                                                                                                                                                                                                                                                                                                                                                                                                                                                                                                                                                                                                                                                                                                                                                                                                            |            |             |             |            |            |             |             |            |            |             |             |             |            |            |            |             |            |             |             |             |            |             |             |            |             |             |             |            |             |             |             |            |             |            |            |            |             |            |            |            |            |            |             |             |             |             |             |             |             |             |             |             |             |             |             |            |             |             |             |            |             |             |             |            |             |             |             |            |             |             |             |             |             |             |             |             |             |             |            |             |             |             |             |             |             |             |             |                                                                                                                                                                                                                                                                                                                                                                                                                                                                                                                                                                                                                                                                                                                                                                                                                                                                                                                                                                                                                                                                                                                                                                                                                                                                                                                                                                                                                                                                                                                                                                                                                                                                                                                                                                                                                                                                                                                                                                                                                                                                                                                                                                                                                                                                                                                                                                                                                                                                                                                                                                                                                                                                         |   |            |             |            |   |            |            |            |   |            |             |            |   |            |            |            |   |            |            |            |   |            |            |             |   |            |            |             |   |            |             |             |   |            |            |             |   |            |             |            |   |            |             |            |   |            |             |             |   |            |             |             |   |            |             |            |   |            |             |            |   |            |             |             |   |             |            |            |   |             |            |            |   |             |            |             |   |             |            |             |   |            |            |            |   |             |             |            |   |             |            |            |   |             |             |             |   |             |             |            |   |             |            |            |   |             |             |             |   |             |             |             |   |             |             |             |   |             |            |            |   |             |             |             |   |             |             |             |
| H                 | -2.29292400                                                                                                                                                                                                                                                                                                                                                                                                                                                                                                                                                                                                                                                                                                                                                                                                                                                                                                                                                                                                                                                                                                                                                                                                                                                                                                                                                                                                                                                                                                                                                                                                                                                                                                                                                                                                                                                                                                                                                                                                                                                                                                                                                                                                                                                                                                                                                                                                                  | 1.60138000                                                                          | -0.86043800                                                                           |             |             |   |             |             |             |   |             |             |             |   |             |             |             |   |             |             |             |   |             |            |             |   |             |             |             |   |             |             |             |   |             |             |             |   |             |             |             |   |             |             |             |   |             |             |            |   |             |             |             |   |             |             |             |   |             |             |             |   |             |             |             |   |             |             |             |   |             |             |             |                                                                                                                                                                                                                                                                                                                                                                                                                                                                                                                                                                                                                                                                                                                                                                                                                                                                                                                                                                                                                                                                                                                                                                                                                                                                                                                                                                                                                                                                                                                                                                                                                                                                                                                                                                           |            |             |             |            |            |             |             |            |            |            |            |             |            |             |             |             |            |             |             |             |            |             |             |            |            |             |             |            |            |             |            |            |            |             |             |            |            |            |            |            |            |            |            |                                                                                                                                                                                                                                                                                                                                                                                                                                                                                                                                                                                                                                                                                                                                                                                                                                                                                                                                                                                                                                                                                                                                                                                                                                                                                                                                                                                                                                                                                                                                                                                                                                                                                                                                                                                                                                                                                                                                                                                                                                                                                                                                                                                                                                                                                                                                                                                                                                                                                                                                                                                                                                                                            |   |            |             |             |   |            |             |             |   |            |             |            |   |            |             |            |   |            |             |            |   |            |             |             |   |             |             |             |   |             |             |             |   |             |             |             |   |             |             |             |                                                                                                                                                                                                                                                                                                                                                                                                                                                                                                                                                                                                                                                                                                                                                                                                                                                                                                                                                                                                                                                                                                                                                                                                                                                                                                                                                                                                                                                                                                                                                                                                                                                                                                                                                                            |            |             |             |            |            |             |             |            |            |             |             |             |            |            |            |             |            |             |             |             |            |             |             |            |             |             |             |            |             |             |             |            |             |            |            |            |             |            |            |            |            |            |             |             |             |             |             |             |             |             |             |             |             |             |             |            |             |             |             |            |             |             |             |            |             |             |             |            |             |             |             |             |             |             |             |             |             |             |            |             |             |             |             |             |             |             |             |                                                                                                                                                                                                                                                                                                                                                                                                                                                                                                                                                                                                                                                                                                                                                                                                                                                                                                                                                                                                                                                                                                                                                                                                                                                                                                                                                                                                                                                                                                                                                                                                                                                                                                                                                                                                                                                                                                                                                                                                                                                                                                                                                                                                                                                                                                                                                                                                                                                                                                                                                                                                                                                                         |   |            |             |            |   |            |            |            |   |            |             |            |   |            |            |            |   |            |            |            |   |            |            |             |   |            |            |             |   |            |             |             |   |            |            |             |   |            |             |            |   |            |             |            |   |            |             |             |   |            |             |             |   |            |             |            |   |            |             |            |   |            |             |             |   |             |            |            |   |             |            |            |   |             |            |             |   |             |            |             |   |            |            |            |   |             |             |            |   |             |            |            |   |             |             |             |   |             |             |            |   |             |            |            |   |             |             |             |   |             |             |             |   |             |             |             |   |             |            |            |   |             |             |             |   |             |             |             |
| H                 | -3.79289300                                                                                                                                                                                                                                                                                                                                                                                                                                                                                                                                                                                                                                                                                                                                                                                                                                                                                                                                                                                                                                                                                                                                                                                                                                                                                                                                                                                                                                                                                                                                                                                                                                                                                                                                                                                                                                                                                                                                                                                                                                                                                                                                                                                                                                                                                                                                                                                                                  | 1.09676600                                                                          | -0.03562000                                                                           |             |             |   |             |             |             |   |             |             |             |   |             |             |             |   |             |             |             |   |             |            |             |   |             |             |             |   |             |             |             |   |             |             |             |   |             |             |             |   |             |             |             |   |             |             |            |   |             |             |             |   |             |             |             |   |             |             |             |   |             |             |             |   |             |             |             |   |             |             |             |                                                                                                                                                                                                                                                                                                                                                                                                                                                                                                                                                                                                                                                                                                                                                                                                                                                                                                                                                                                                                                                                                                                                                                                                                                                                                                                                                                                                                                                                                                                                                                                                                                                                                                                                                                           |            |             |             |            |            |             |             |            |            |            |            |             |            |             |             |             |            |             |             |             |            |             |             |            |            |             |             |            |            |             |            |            |            |             |             |            |            |            |            |            |            |            |            |                                                                                                                                                                                                                                                                                                                                                                                                                                                                                                                                                                                                                                                                                                                                                                                                                                                                                                                                                                                                                                                                                                                                                                                                                                                                                                                                                                                                                                                                                                                                                                                                                                                                                                                                                                                                                                                                                                                                                                                                                                                                                                                                                                                                                                                                                                                                                                                                                                                                                                                                                                                                                                                                            |   |            |             |             |   |            |             |             |   |            |             |            |   |            |             |            |   |            |             |            |   |            |             |             |   |             |             |             |   |             |             |             |   |             |             |             |   |             |             |             |                                                                                                                                                                                                                                                                                                                                                                                                                                                                                                                                                                                                                                                                                                                                                                                                                                                                                                                                                                                                                                                                                                                                                                                                                                                                                                                                                                                                                                                                                                                                                                                                                                                                                                                                                                            |            |             |             |            |            |             |             |            |            |             |             |             |            |            |            |             |            |             |             |             |            |             |             |            |             |             |             |            |             |             |             |            |             |            |            |            |             |            |            |            |            |            |             |             |             |             |             |             |             |             |             |             |             |             |             |            |             |             |             |            |             |             |             |            |             |             |             |            |             |             |             |             |             |             |             |             |             |             |            |             |             |             |             |             |             |             |             |                                                                                                                                                                                                                                                                                                                                                                                                                                                                                                                                                                                                                                                                                                                                                                                                                                                                                                                                                                                                                                                                                                                                                                                                                                                                                                                                                                                                                                                                                                                                                                                                                                                                                                                                                                                                                                                                                                                                                                                                                                                                                                                                                                                                                                                                                                                                                                                                                                                                                                                                                                                                                                                                         |   |            |             |            |   |            |            |            |   |            |             |            |   |            |            |            |   |            |            |            |   |            |            |             |   |            |            |             |   |            |             |             |   |            |            |             |   |            |             |            |   |            |             |            |   |            |             |             |   |            |             |             |   |            |             |            |   |            |             |            |   |            |             |             |   |             |            |            |   |             |            |            |   |             |            |             |   |             |            |             |   |            |            |            |   |             |             |            |   |             |            |            |   |             |             |             |   |             |             |            |   |             |            |            |   |             |             |             |   |             |             |             |   |             |             |             |   |             |            |            |   |             |             |             |   |             |             |             |
| H                 | -2.34617600                                                                                                                                                                                                                                                                                                                                                                                                                                                                                                                                                                                                                                                                                                                                                                                                                                                                                                                                                                                                                                                                                                                                                                                                                                                                                                                                                                                                                                                                                                                                                                                                                                                                                                                                                                                                                                                                                                                                                                                                                                                                                                                                                                                                                                                                                                                                                                                                                  | 1.58613100                                                                          | 0.88371500                                                                            |             |             |   |             |             |             |   |             |             |             |   |             |             |             |   |             |             |             |   |             |            |             |   |             |             |             |   |             |             |             |   |             |             |             |   |             |             |             |   |             |             |             |   |             |             |            |   |             |             |             |   |             |             |             |   |             |             |             |   |             |             |             |   |             |             |             |   |             |             |             |                                                                                                                                                                                                                                                                                                                                                                                                                                                                                                                                                                                                                                                                                                                                                                                                                                                                                                                                                                                                                                                                                                                                                                                                                                                                                                                                                                                                                                                                                                                                                                                                                                                                                                                                                                           |            |             |             |            |            |             |             |            |            |            |            |             |            |             |             |             |            |             |             |             |            |             |             |            |            |             |             |            |            |             |            |            |            |             |             |            |            |            |            |            |            |            |            |                                                                                                                                                                                                                                                                                                                                                                                                                                                                                                                                                                                                                                                                                                                                                                                                                                                                                                                                                                                                                                                                                                                                                                                                                                                                                                                                                                                                                                                                                                                                                                                                                                                                                                                                                                                                                                                                                                                                                                                                                                                                                                                                                                                                                                                                                                                                                                                                                                                                                                                                                                                                                                                                            |   |            |             |             |   |            |             |             |   |            |             |            |   |            |             |            |   |            |             |            |   |            |             |             |   |             |             |             |   |             |             |             |   |             |             |             |   |             |             |             |                                                                                                                                                                                                                                                                                                                                                                                                                                                                                                                                                                                                                                                                                                                                                                                                                                                                                                                                                                                                                                                                                                                                                                                                                                                                                                                                                                                                                                                                                                                                                                                                                                                                                                                                                                            |            |             |             |            |            |             |             |            |            |             |             |             |            |            |            |             |            |             |             |             |            |             |             |            |             |             |             |            |             |             |             |            |             |            |            |            |             |            |            |            |            |            |             |             |             |             |             |             |             |             |             |             |             |             |             |            |             |             |             |            |             |             |             |            |             |             |             |            |             |             |             |             |             |             |             |             |             |             |            |             |             |             |             |             |             |             |             |                                                                                                                                                                                                                                                                                                                                                                                                                                                                                                                                                                                                                                                                                                                                                                                                                                                                                                                                                                                                                                                                                                                                                                                                                                                                                                                                                                                                                                                                                                                                                                                                                                                                                                                                                                                                                                                                                                                                                                                                                                                                                                                                                                                                                                                                                                                                                                                                                                                                                                                                                                                                                                                                         |   |            |             |            |   |            |            |            |   |            |             |            |   |            |            |            |   |            |            |            |   |            |            |             |   |            |            |             |   |            |             |             |   |            |            |             |   |            |             |            |   |            |             |            |   |            |             |             |   |            |             |             |   |            |             |            |   |            |             |            |   |            |             |             |   |             |            |            |   |             |            |            |   |             |            |             |   |             |            |             |   |            |            |            |   |             |             |            |   |             |            |            |   |             |             |             |   |             |             |            |   |             |            |            |   |             |             |             |   |             |             |             |   |             |             |             |   |             |            |            |   |             |             |             |   |             |             |             |
| C                 | 3.77390800                                                                                                                                                                                                                                                                                                                                                                                                                                                                                                                                                                                                                                                                                                                                                                                                                                                                                                                                                                                                                                                                                                                                                                                                                                                                                                                                                                                                                                                                                                                                                                                                                                                                                                                                                                                                                                                                                                                                                                                                                                                                                                                                                                                                                                                                                                                                                                                                                   | -0.55271100                                                                         | -0.00360300                                                                           |             |             |   |             |             |             |   |             |             |             |   |             |             |             |   |             |             |             |   |             |            |             |   |             |             |             |   |             |             |             |   |             |             |             |   |             |             |             |   |             |             |             |   |             |             |            |   |             |             |             |   |             |             |             |   |             |             |             |   |             |             |             |   |             |             |             |   |             |             |             |                                                                                                                                                                                                                                                                                                                                                                                                                                                                                                                                                                                                                                                                                                                                                                                                                                                                                                                                                                                                                                                                                                                                                                                                                                                                                                                                                                                                                                                                                                                                                                                                                                                                                                                                                                           |            |             |             |            |            |             |             |            |            |            |            |             |            |             |             |             |            |             |             |             |            |             |             |            |            |             |             |            |            |             |            |            |            |             |             |            |            |            |            |            |            |            |            |                                                                                                                                                                                                                                                                                                                                                                                                                                                                                                                                                                                                                                                                                                                                                                                                                                                                                                                                                                                                                                                                                                                                                                                                                                                                                                                                                                                                                                                                                                                                                                                                                                                                                                                                                                                                                                                                                                                                                                                                                                                                                                                                                                                                                                                                                                                                                                                                                                                                                                                                                                                                                                                                            |   |            |             |             |   |            |             |             |   |            |             |            |   |            |             |            |   |            |             |            |   |            |             |             |   |             |             |             |   |             |             |             |   |             |             |             |   |             |             |             |                                                                                                                                                                                                                                                                                                                                                                                                                                                                                                                                                                                                                                                                                                                                                                                                                                                                                                                                                                                                                                                                                                                                                                                                                                                                                                                                                                                                                                                                                                                                                                                                                                                                                                                                                                            |            |             |             |            |            |             |             |            |            |             |             |             |            |            |            |             |            |             |             |             |            |             |             |            |             |             |             |            |             |             |             |            |             |            |            |            |             |            |            |            |            |            |             |             |             |             |             |             |             |             |             |             |             |             |             |            |             |             |             |            |             |             |             |            |             |             |             |            |             |             |             |             |             |             |             |             |             |             |            |             |             |             |             |             |             |             |             |                                                                                                                                                                                                                                                                                                                                                                                                                                                                                                                                                                                                                                                                                                                                                                                                                                                                                                                                                                                                                                                                                                                                                                                                                                                                                                                                                                                                                                                                                                                                                                                                                                                                                                                                                                                                                                                                                                                                                                                                                                                                                                                                                                                                                                                                                                                                                                                                                                                                                                                                                                                                                                                                         |   |            |             |            |   |            |            |            |   |            |             |            |   |            |            |            |   |            |            |            |   |            |            |             |   |            |            |             |   |            |             |             |   |            |            |             |   |            |             |            |   |            |             |            |   |            |             |             |   |            |             |             |   |            |             |            |   |            |             |            |   |            |             |             |   |             |            |            |   |             |            |            |   |             |            |             |   |             |            |             |   |            |            |            |   |             |             |            |   |             |            |            |   |             |             |             |   |             |             |            |   |             |            |            |   |             |             |             |   |             |             |             |   |             |             |             |   |             |            |            |   |             |             |             |   |             |             |             |
| H                 | 3.77722900                                                                                                                                                                                                                                                                                                                                                                                                                                                                                                                                                                                                                                                                                                                                                                                                                                                                                                                                                                                                                                                                                                                                                                                                                                                                                                                                                                                                                                                                                                                                                                                                                                                                                                                                                                                                                                                                                                                                                                                                                                                                                                                                                                                                                                                                                                                                                                                                                   | -1.18436800                                                                         | -0.89329800                                                                           |             |             |   |             |             |             |   |             |             |             |   |             |             |             |   |             |             |             |   |             |            |             |   |             |             |             |   |             |             |             |   |             |             |             |   |             |             |             |   |             |             |             |   |             |             |            |   |             |             |             |   |             |             |             |   |             |             |             |   |             |             |             |   |             |             |             |   |             |             |             |                                                                                                                                                                                                                                                                                                                                                                                                                                                                                                                                                                                                                                                                                                                                                                                                                                                                                                                                                                                                                                                                                                                                                                                                                                                                                                                                                                                                                                                                                                                                                                                                                                                                                                                                                                           |            |             |             |            |            |             |             |            |            |            |            |             |            |             |             |             |            |             |             |             |            |             |             |            |            |             |             |            |            |             |            |            |            |             |             |            |            |            |            |            |            |            |            |                                                                                                                                                                                                                                                                                                                                                                                                                                                                                                                                                                                                                                                                                                                                                                                                                                                                                                                                                                                                                                                                                                                                                                                                                                                                                                                                                                                                                                                                                                                                                                                                                                                                                                                                                                                                                                                                                                                                                                                                                                                                                                                                                                                                                                                                                                                                                                                                                                                                                                                                                                                                                                                                            |   |            |             |             |   |            |             |             |   |            |             |            |   |            |             |            |   |            |             |            |   |            |             |             |   |             |             |             |   |             |             |             |   |             |             |             |   |             |             |             |                                                                                                                                                                                                                                                                                                                                                                                                                                                                                                                                                                                                                                                                                                                                                                                                                                                                                                                                                                                                                                                                                                                                                                                                                                                                                                                                                                                                                                                                                                                                                                                                                                                                                                                                                                            |            |             |             |            |            |             |             |            |            |             |             |             |            |            |            |             |            |             |             |             |            |             |             |            |             |             |             |            |             |             |             |            |             |            |            |            |             |            |            |            |            |            |             |             |             |             |             |             |             |             |             |             |             |             |             |            |             |             |             |            |             |             |             |            |             |             |             |            |             |             |             |             |             |             |             |             |             |             |            |             |             |             |             |             |             |             |             |                                                                                                                                                                                                                                                                                                                                                                                                                                                                                                                                                                                                                                                                                                                                                                                                                                                                                                                                                                                                                                                                                                                                                                                                                                                                                                                                                                                                                                                                                                                                                                                                                                                                                                                                                                                                                                                                                                                                                                                                                                                                                                                                                                                                                                                                                                                                                                                                                                                                                                                                                                                                                                                                         |   |            |             |            |   |            |            |            |   |            |             |            |   |            |            |            |   |            |            |            |   |            |            |             |   |            |            |             |   |            |             |             |   |            |            |             |   |            |             |            |   |            |             |            |   |            |             |             |   |            |             |             |   |            |             |            |   |            |             |            |   |            |             |             |   |             |            |            |   |             |            |            |   |             |            |             |   |             |            |             |   |            |            |            |   |             |             |            |   |             |            |            |   |             |             |             |   |             |             |            |   |             |            |            |   |             |             |             |   |             |             |             |   |             |             |             |   |             |            |            |   |             |             |             |   |             |             |             |
| H                 | 4.69062100                                                                                                                                                                                                                                                                                                                                                                                                                                                                                                                                                                                                                                                                                                                                                                                                                                                                                                                                                                                                                                                                                                                                                                                                                                                                                                                                                                                                                                                                                                                                                                                                                                                                                                                                                                                                                                                                                                                                                                                                                                                                                                                                                                                                                                                                                                                                                                                                                   | 0.03903500                                                                          | -0.00014200                                                                           |             |             |   |             |             |             |   |             |             |             |   |             |             |             |   |             |             |             |   |             |            |             |   |             |             |             |   |             |             |             |   |             |             |             |   |             |             |             |   |             |             |             |   |             |             |            |   |             |             |             |   |             |             |             |   |             |             |             |   |             |             |             |   |             |             |             |   |             |             |             |                                                                                                                                                                                                                                                                                                                                                                                                                                                                                                                                                                                                                                                                                                                                                                                                                                                                                                                                                                                                                                                                                                                                                                                                                                                                                                                                                                                                                                                                                                                                                                                                                                                                                                                                                                           |            |             |             |            |            |             |             |            |            |            |            |             |            |             |             |             |            |             |             |             |            |             |             |            |            |             |             |            |            |             |            |            |            |             |             |            |            |            |            |            |            |            |            |                                                                                                                                                                                                                                                                                                                                                                                                                                                                                                                                                                                                                                                                                                                                                                                                                                                                                                                                                                                                                                                                                                                                                                                                                                                                                                                                                                                                                                                                                                                                                                                                                                                                                                                                                                                                                                                                                                                                                                                                                                                                                                                                                                                                                                                                                                                                                                                                                                                                                                                                                                                                                                                                            |   |            |             |             |   |            |             |             |   |            |             |            |   |            |             |            |   |            |             |            |   |            |             |             |   |             |             |             |   |             |             |             |   |             |             |             |   |             |             |             |                                                                                                                                                                                                                                                                                                                                                                                                                                                                                                                                                                                                                                                                                                                                                                                                                                                                                                                                                                                                                                                                                                                                                                                                                                                                                                                                                                                                                                                                                                                                                                                                                                                                                                                                                                            |            |             |             |            |            |             |             |            |            |             |             |             |            |            |            |             |            |             |             |             |            |             |             |            |             |             |             |            |             |             |             |            |             |            |            |            |             |            |            |            |            |            |             |             |             |             |             |             |             |             |             |             |             |             |             |            |             |             |             |            |             |             |             |            |             |             |             |            |             |             |             |             |             |             |             |             |             |             |            |             |             |             |             |             |             |             |             |                                                                                                                                                                                                                                                                                                                                                                                                                                                                                                                                                                                                                                                                                                                                                                                                                                                                                                                                                                                                                                                                                                                                                                                                                                                                                                                                                                                                                                                                                                                                                                                                                                                                                                                                                                                                                                                                                                                                                                                                                                                                                                                                                                                                                                                                                                                                                                                                                                                                                                                                                                                                                                                                         |   |            |             |            |   |            |            |            |   |            |             |            |   |            |            |            |   |            |            |            |   |            |            |             |   |            |            |             |   |            |             |             |   |            |            |             |   |            |             |            |   |            |             |            |   |            |             |             |   |            |             |             |   |            |             |            |   |            |             |            |   |            |             |             |   |             |            |            |   |             |            |            |   |             |            |             |   |             |            |             |   |            |            |            |   |             |             |            |   |             |            |            |   |             |             |             |   |             |             |            |   |             |            |            |   |             |             |             |   |             |             |             |   |             |             |             |   |             |            |            |   |             |             |             |   |             |             |             |
| H                 | 3.77796500                                                                                                                                                                                                                                                                                                                                                                                                                                                                                                                                                                                                                                                                                                                                                                                                                                                                                                                                                                                                                                                                                                                                                                                                                                                                                                                                                                                                                                                                                                                                                                                                                                                                                                                                                                                                                                                                                                                                                                                                                                                                                                                                                                                                                                                                                                                                                                                                                   | -1.19590500                                                                         | 0.87777400                                                                            |             |             |   |             |             |             |   |             |             |             |   |             |             |             |   |             |             |             |   |             |            |             |   |             |             |             |   |             |             |             |   |             |             |             |   |             |             |             |   |             |             |             |   |             |             |            |   |             |             |             |   |             |             |             |   |             |             |             |   |             |             |             |   |             |             |             |   |             |             |             |                                                                                                                                                                                                                                                                                                                                                                                                                                                                                                                                                                                                                                                                                                                                                                                                                                                                                                                                                                                                                                                                                                                                                                                                                                                                                                                                                                                                                                                                                                                                                                                                                                                                                                                                                                           |            |             |             |            |            |             |             |            |            |            |            |             |            |             |             |             |            |             |             |             |            |             |             |            |            |             |             |            |            |             |            |            |            |             |             |            |            |            |            |            |            |            |            |                                                                                                                                                                                                                                                                                                                                                                                                                                                                                                                                                                                                                                                                                                                                                                                                                                                                                                                                                                                                                                                                                                                                                                                                                                                                                                                                                                                                                                                                                                                                                                                                                                                                                                                                                                                                                                                                                                                                                                                                                                                                                                                                                                                                                                                                                                                                                                                                                                                                                                                                                                                                                                                                            |   |            |             |             |   |            |             |             |   |            |             |            |   |            |             |            |   |            |             |            |   |            |             |             |   |             |             |             |   |             |             |             |   |             |             |             |   |             |             |             |                                                                                                                                                                                                                                                                                                                                                                                                                                                                                                                                                                                                                                                                                                                                                                                                                                                                                                                                                                                                                                                                                                                                                                                                                                                                                                                                                                                                                                                                                                                                                                                                                                                                                                                                                                            |            |             |             |            |            |             |             |            |            |             |             |             |            |            |            |             |            |             |             |             |            |             |             |            |             |             |             |            |             |             |             |            |             |            |            |            |             |            |            |            |            |            |             |             |             |             |             |             |             |             |             |             |             |             |             |            |             |             |             |            |             |             |             |            |             |             |             |            |             |             |             |             |             |             |             |             |             |             |            |             |             |             |             |             |             |             |             |                                                                                                                                                                                                                                                                                                                                                                                                                                                                                                                                                                                                                                                                                                                                                                                                                                                                                                                                                                                                                                                                                                                                                                                                                                                                                                                                                                                                                                                                                                                                                                                                                                                                                                                                                                                                                                                                                                                                                                                                                                                                                                                                                                                                                                                                                                                                                                                                                                                                                                                                                                                                                                                                         |   |            |             |            |   |            |            |            |   |            |             |            |   |            |            |            |   |            |            |            |   |            |            |             |   |            |            |             |   |            |             |             |   |            |            |             |   |            |             |            |   |            |             |            |   |            |             |             |   |            |             |             |   |            |             |            |   |            |             |            |   |            |             |             |   |             |            |            |   |             |            |            |   |             |            |             |   |             |            |             |   |            |            |            |   |             |             |            |   |             |            |            |   |             |             |             |   |             |             |            |   |             |            |            |   |             |             |             |   |             |             |             |   |             |             |             |   |             |            |            |   |             |             |             |   |             |             |             |
| C                 | -0.88425700                                                                                                                                                                                                                                                                                                                                                                                                                                                                                                                                                                                                                                                                                                                                                                                                                                                                                                                                                                                                                                                                                                                                                                                                                                                                                                                                                                                                                                                                                                                                                                                                                                                                                                                                                                                                                                                                                                                                                                                                                                                                                                                                                                                                                                                                                                                                                                                                                  | -0.70595900                                                                         | 0.00075200                                                                            |             |             |   |             |             |             |   |             |             |             |   |             |             |             |   |             |             |             |   |             |            |             |   |             |             |             |   |             |             |             |   |             |             |             |   |             |             |             |   |             |             |             |   |             |             |            |   |             |             |             |   |             |             |             |   |             |             |             |   |             |             |             |   |             |             |             |   |             |             |             |                                                                                                                                                                                                                                                                                                                                                                                                                                                                                                                                                                                                                                                                                                                                                                                                                                                                                                                                                                                                                                                                                                                                                                                                                                                                                                                                                                                                                                                                                                                                                                                                                                                                                                                                                                           |            |             |             |            |            |             |             |            |            |            |            |             |            |             |             |             |            |             |             |             |            |             |             |            |            |             |             |            |            |             |            |            |            |             |             |            |            |            |            |            |            |            |            |                                                                                                                                                                                                                                                                                                                                                                                                                                                                                                                                                                                                                                                                                                                                                                                                                                                                                                                                                                                                                                                                                                                                                                                                                                                                                                                                                                                                                                                                                                                                                                                                                                                                                                                                                                                                                                                                                                                                                                                                                                                                                                                                                                                                                                                                                                                                                                                                                                                                                                                                                                                                                                                                            |   |            |             |             |   |            |             |             |   |            |             |            |   |            |             |            |   |            |             |            |   |            |             |             |   |             |             |             |   |             |             |             |   |             |             |             |   |             |             |             |                                                                                                                                                                                                                                                                                                                                                                                                                                                                                                                                                                                                                                                                                                                                                                                                                                                                                                                                                                                                                                                                                                                                                                                                                                                                                                                                                                                                                                                                                                                                                                                                                                                                                                                                                                            |            |             |             |            |            |             |             |            |            |             |             |             |            |            |            |             |            |             |             |             |            |             |             |            |             |             |             |            |             |             |             |            |             |            |            |            |             |            |            |            |            |            |             |             |             |             |             |             |             |             |             |             |             |             |             |            |             |             |             |            |             |             |             |            |             |             |             |            |             |             |             |             |             |             |             |             |             |             |            |             |             |             |             |             |             |             |             |                                                                                                                                                                                                                                                                                                                                                                                                                                                                                                                                                                                                                                                                                                                                                                                                                                                                                                                                                                                                                                                                                                                                                                                                                                                                                                                                                                                                                                                                                                                                                                                                                                                                                                                                                                                                                                                                                                                                                                                                                                                                                                                                                                                                                                                                                                                                                                                                                                                                                                                                                                                                                                                                         |   |            |             |            |   |            |            |            |   |            |             |            |   |            |            |            |   |            |            |            |   |            |            |             |   |            |            |             |   |            |             |             |   |            |            |             |   |            |             |            |   |            |             |            |   |            |             |             |   |            |             |             |   |            |             |            |   |            |             |            |   |            |             |             |   |             |            |            |   |             |            |            |   |             |            |             |   |             |            |             |   |            |            |            |   |             |             |            |   |             |            |            |   |             |             |             |   |             |             |            |   |             |            |            |   |             |             |             |   |             |             |             |   |             |             |             |   |             |            |            |   |             |             |             |   |             |             |             |
| H                 | -0.62915900                                                                                                                                                                                                                                                                                                                                                                                                                                                                                                                                                                                                                                                                                                                                                                                                                                                                                                                                                                                                                                                                                                                                                                                                                                                                                                                                                                                                                                                                                                                                                                                                                                                                                                                                                                                                                                                                                                                                                                                                                                                                                                                                                                                                                                                                                                                                                                                                                  | -1.75870200                                                                         | 0.00244100                                                                            |             |             |   |             |             |             |   |             |             |             |   |             |             |             |   |             |             |             |   |             |            |             |   |             |             |             |   |             |             |             |   |             |             |             |   |             |             |             |   |             |             |             |   |             |             |            |   |             |             |             |   |             |             |             |   |             |             |             |   |             |             |             |   |             |             |             |   |             |             |             |                                                                                                                                                                                                                                                                                                                                                                                                                                                                                                                                                                                                                                                                                                                                                                                                                                                                                                                                                                                                                                                                                                                                                                                                                                                                                                                                                                                                                                                                                                                                                                                                                                                                                                                                                                           |            |             |             |            |            |             |             |            |            |            |            |             |            |             |             |             |            |             |             |             |            |             |             |            |            |             |             |            |            |             |            |            |            |             |             |            |            |            |            |            |            |            |            |                                                                                                                                                                                                                                                                                                                                                                                                                                                                                                                                                                                                                                                                                                                                                                                                                                                                                                                                                                                                                                                                                                                                                                                                                                                                                                                                                                                                                                                                                                                                                                                                                                                                                                                                                                                                                                                                                                                                                                                                                                                                                                                                                                                                                                                                                                                                                                                                                                                                                                                                                                                                                                                                            |   |            |             |             |   |            |             |             |   |            |             |            |   |            |             |            |   |            |             |            |   |            |             |             |   |             |             |             |   |             |             |             |   |             |             |             |   |             |             |             |                                                                                                                                                                                                                                                                                                                                                                                                                                                                                                                                                                                                                                                                                                                                                                                                                                                                                                                                                                                                                                                                                                                                                                                                                                                                                                                                                                                                                                                                                                                                                                                                                                                                                                                                                                            |            |             |             |            |            |             |             |            |            |             |             |             |            |            |            |             |            |             |             |             |            |             |             |            |             |             |             |            |             |             |             |            |             |            |            |            |             |            |            |            |            |            |             |             |             |             |             |             |             |             |             |             |             |             |             |            |             |             |             |            |             |             |             |            |             |             |             |            |             |             |             |             |             |             |             |             |             |             |            |             |             |             |             |             |             |             |             |                                                                                                                                                                                                                                                                                                                                                                                                                                                                                                                                                                                                                                                                                                                                                                                                                                                                                                                                                                                                                                                                                                                                                                                                                                                                                                                                                                                                                                                                                                                                                                                                                                                                                                                                                                                                                                                                                                                                                                                                                                                                                                                                                                                                                                                                                                                                                                                                                                                                                                                                                                                                                                                                         |   |            |             |            |   |            |            |            |   |            |             |            |   |            |            |            |   |            |            |            |   |            |            |             |   |            |            |             |   |            |             |             |   |            |            |             |   |            |             |            |   |            |             |            |   |            |             |             |   |            |             |             |   |            |             |            |   |            |             |            |   |            |             |             |   |             |            |            |   |             |            |            |   |             |            |             |   |             |            |             |   |            |            |            |   |             |             |            |   |             |            |            |   |             |             |             |   |             |             |            |   |             |            |            |   |             |             |             |   |             |             |             |   |             |             |             |   |             |            |            |   |             |             |             |   |             |             |             |
| C                 | -0.57313900                                                                                                                                                                                                                                                                                                                                                                                                                                                                                                                                                                                                                                                                                                                                                                                                                                                                                                                                                                                                                                                                                                                                                                                                                                                                                                                                                                                                                                                                                                                                                                                                                                                                                                                                                                                                                                                                                                                                                                                                                                                                                                                                                                                                                                                                                                                                                                                                                  | -0.40540000                                                                         | 0.26809400                                                                            |             |             |   |             |             |             |   |             |             |             |   |             |             |             |   |             |             |             |   |             |            |             |   |             |             |             |   |             |             |             |   |             |             |             |   |             |             |             |   |             |             |             |   |             |             |            |   |             |             |             |   |             |             |             |   |             |             |             |   |             |             |             |   |             |             |             |   |             |             |             |                                                                                                                                                                                                                                                                                                                                                                                                                                                                                                                                                                                                                                                                                                                                                                                                                                                                                                                                                                                                                                                                                                                                                                                                                                                                                                                                                                                                                                                                                                                                                                                                                                                                                                                                                                           |            |             |             |            |            |             |             |            |            |            |            |             |            |             |             |             |            |             |             |             |            |             |             |            |            |             |             |            |            |             |            |            |            |             |             |            |            |            |            |            |            |            |            |                                                                                                                                                                                                                                                                                                                                                                                                                                                                                                                                                                                                                                                                                                                                                                                                                                                                                                                                                                                                                                                                                                                                                                                                                                                                                                                                                                                                                                                                                                                                                                                                                                                                                                                                                                                                                                                                                                                                                                                                                                                                                                                                                                                                                                                                                                                                                                                                                                                                                                                                                                                                                                                                            |   |            |             |             |   |            |             |             |   |            |             |            |   |            |             |            |   |            |             |            |   |            |             |             |   |             |             |             |   |             |             |             |   |             |             |             |   |             |             |             |                                                                                                                                                                                                                                                                                                                                                                                                                                                                                                                                                                                                                                                                                                                                                                                                                                                                                                                                                                                                                                                                                                                                                                                                                                                                                                                                                                                                                                                                                                                                                                                                                                                                                                                                                                            |            |             |             |            |            |             |             |            |            |             |             |             |            |            |            |             |            |             |             |             |            |             |             |            |             |             |             |            |             |             |             |            |             |            |            |            |             |            |            |            |            |            |             |             |             |             |             |             |             |             |             |             |             |             |             |            |             |             |             |            |             |             |             |            |             |             |             |            |             |             |             |             |             |             |             |             |             |             |            |             |             |             |             |             |             |             |             |                                                                                                                                                                                                                                                                                                                                                                                                                                                                                                                                                                                                                                                                                                                                                                                                                                                                                                                                                                                                                                                                                                                                                                                                                                                                                                                                                                                                                                                                                                                                                                                                                                                                                                                                                                                                                                                                                                                                                                                                                                                                                                                                                                                                                                                                                                                                                                                                                                                                                                                                                                                                                                                                         |   |            |             |            |   |            |            |            |   |            |             |            |   |            |            |            |   |            |            |            |   |            |            |             |   |            |            |             |   |            |             |             |   |            |            |             |   |            |             |            |   |            |             |            |   |            |             |             |   |            |             |             |   |            |             |            |   |            |             |            |   |            |             |             |   |             |            |            |   |             |            |            |   |             |            |             |   |             |            |             |   |            |            |            |   |             |             |            |   |             |            |            |   |             |             |             |   |             |             |            |   |             |            |            |   |             |             |             |   |             |             |             |   |             |             |             |   |             |            |            |   |             |             |             |   |             |             |             |
| O                 | -0.57557600                                                                                                                                                                                                                                                                                                                                                                                                                                                                                                                                                                                                                                                                                                                                                                                                                                                                                                                                                                                                                                                                                                                                                                                                                                                                                                                                                                                                                                                                                                                                                                                                                                                                                                                                                                                                                                                                                                                                                                                                                                                                                                                                                                                                                                                                                                                                                                                                                  | -0.97485300                                                                         | 1.33285700                                                                            |             |             |   |             |             |             |   |             |             |             |   |             |             |             |   |             |             |             |   |             |            |             |   |             |             |             |   |             |             |             |   |             |             |             |   |             |             |             |   |             |             |             |   |             |             |            |   |             |             |             |   |             |             |             |   |             |             |             |   |             |             |             |   |             |             |             |   |             |             |             |                                                                                                                                                                                                                                                                                                                                                                                                                                                                                                                                                                                                                                                                                                                                                                                                                                                                                                                                                                                                                                                                                                                                                                                                                                                                                                                                                                                                                                                                                                                                                                                                                                                                                                                                                                           |            |             |             |            |            |             |             |            |            |            |            |             |            |             |             |             |            |             |             |             |            |             |             |            |            |             |             |            |            |             |            |            |            |             |             |            |            |            |            |            |            |            |            |                                                                                                                                                                                                                                                                                                                                                                                                                                                                                                                                                                                                                                                                                                                                                                                                                                                                                                                                                                                                                                                                                                                                                                                                                                                                                                                                                                                                                                                                                                                                                                                                                                                                                                                                                                                                                                                                                                                                                                                                                                                                                                                                                                                                                                                                                                                                                                                                                                                                                                                                                                                                                                                                            |   |            |             |             |   |            |             |             |   |            |             |            |   |            |             |            |   |            |             |            |   |            |             |             |   |             |             |             |   |             |             |             |   |             |             |             |   |             |             |             |                                                                                                                                                                                                                                                                                                                                                                                                                                                                                                                                                                                                                                                                                                                                                                                                                                                                                                                                                                                                                                                                                                                                                                                                                                                                                                                                                                                                                                                                                                                                                                                                                                                                                                                                                                            |            |             |             |            |            |             |             |            |            |             |             |             |            |            |            |             |            |             |             |             |            |             |             |            |             |             |             |            |             |             |             |            |             |            |            |            |             |            |            |            |            |            |             |             |             |             |             |             |             |             |             |             |             |             |             |            |             |             |             |            |             |             |             |            |             |             |             |            |             |             |             |             |             |             |             |             |             |             |            |             |             |             |             |             |             |             |             |                                                                                                                                                                                                                                                                                                                                                                                                                                                                                                                                                                                                                                                                                                                                                                                                                                                                                                                                                                                                                                                                                                                                                                                                                                                                                                                                                                                                                                                                                                                                                                                                                                                                                                                                                                                                                                                                                                                                                                                                                                                                                                                                                                                                                                                                                                                                                                                                                                                                                                                                                                                                                                                                         |   |            |             |            |   |            |            |            |   |            |             |            |   |            |            |            |   |            |            |            |   |            |            |             |   |            |            |             |   |            |             |             |   |            |            |             |   |            |             |            |   |            |             |            |   |            |             |             |   |            |             |             |   |            |             |            |   |            |             |            |   |            |             |             |   |             |            |            |   |             |            |            |   |             |            |             |   |             |            |             |   |            |            |            |   |             |             |            |   |             |            |            |   |             |             |             |   |             |             |            |   |             |            |            |   |             |             |             |   |             |             |             |   |             |             |             |   |             |            |            |   |             |             |             |   |             |             |             |
| C                 | 0.64538200                                                                                                                                                                                                                                                                                                                                                                                                                                                                                                                                                                                                                                                                                                                                                                                                                                                                                                                                                                                                                                                                                                                                                                                                                                                                                                                                                                                                                                                                                                                                                                                                                                                                                                                                                                                                                                                                                                                                                                                                                                                                                                                                                                                                                                                                                                                                                                                                                   | 0.05626200                                                                          | -0.48219200                                                                           |             |             |   |             |             |             |   |             |             |             |   |             |             |             |   |             |             |             |   |             |            |             |   |             |             |             |   |             |             |             |   |             |             |             |   |             |             |             |   |             |             |             |   |             |             |            |   |             |             |             |   |             |             |             |   |             |             |             |   |             |             |             |   |             |             |             |   |             |             |             |                                                                                                                                                                                                                                                                                                                                                                                                                                                                                                                                                                                                                                                                                                                                                                                                                                                                                                                                                                                                                                                                                                                                                                                                                                                                                                                                                                                                                                                                                                                                                                                                                                                                                                                                                                           |            |             |             |            |            |             |             |            |            |            |            |             |            |             |             |             |            |             |             |             |            |             |             |            |            |             |             |            |            |             |            |            |            |             |             |            |            |            |            |            |            |            |            |                                                                                                                                                                                                                                                                                                                                                                                                                                                                                                                                                                                                                                                                                                                                                                                                                                                                                                                                                                                                                                                                                                                                                                                                                                                                                                                                                                                                                                                                                                                                                                                                                                                                                                                                                                                                                                                                                                                                                                                                                                                                                                                                                                                                                                                                                                                                                                                                                                                                                                                                                                                                                                                                            |   |            |             |             |   |            |             |             |   |            |             |            |   |            |             |            |   |            |             |            |   |            |             |             |   |             |             |             |   |             |             |             |   |             |             |             |   |             |             |             |                                                                                                                                                                                                                                                                                                                                                                                                                                                                                                                                                                                                                                                                                                                                                                                                                                                                                                                                                                                                                                                                                                                                                                                                                                                                                                                                                                                                                                                                                                                                                                                                                                                                                                                                                                            |            |             |             |            |            |             |             |            |            |             |             |             |            |            |            |             |            |             |             |             |            |             |             |            |             |             |             |            |             |             |             |            |             |            |            |            |             |            |            |            |            |            |             |             |             |             |             |             |             |             |             |             |             |             |             |            |             |             |             |            |             |             |             |            |             |             |             |            |             |             |             |             |             |             |             |             |             |             |            |             |             |             |             |             |             |             |             |                                                                                                                                                                                                                                                                                                                                                                                                                                                                                                                                                                                                                                                                                                                                                                                                                                                                                                                                                                                                                                                                                                                                                                                                                                                                                                                                                                                                                                                                                                                                                                                                                                                                                                                                                                                                                                                                                                                                                                                                                                                                                                                                                                                                                                                                                                                                                                                                                                                                                                                                                                                                                                                                         |   |            |             |            |   |            |            |            |   |            |             |            |   |            |            |            |   |            |            |            |   |            |            |             |   |            |            |             |   |            |             |             |   |            |            |             |   |            |             |            |   |            |             |            |   |            |             |             |   |            |             |             |   |            |             |            |   |            |             |            |   |            |             |             |   |             |            |            |   |             |            |            |   |             |            |             |   |             |            |             |   |            |            |            |   |             |             |            |   |             |            |            |   |             |             |             |   |             |             |            |   |             |            |            |   |             |             |             |   |             |             |             |   |             |             |             |   |             |            |            |   |             |             |             |   |             |             |             |
| H                 | 0.39009900                                                                                                                                                                                                                                                                                                                                                                                                                                                                                                                                                                                                                                                                                                                                                                                                                                                                                                                                                                                                                                                                                                                                                                                                                                                                                                                                                                                                                                                                                                                                                                                                                                                                                                                                                                                                                                                                                                                                                                                                                                                                                                                                                                                                                                                                                                                                                                                                                   | 0.17037500                                                                          | -1.53510500                                                                           |             |             |   |             |             |             |   |             |             |             |   |             |             |             |   |             |             |             |   |             |            |             |   |             |             |             |   |             |             |             |   |             |             |             |   |             |             |             |   |             |             |             |   |             |             |            |   |             |             |             |   |             |             |             |   |             |             |             |   |             |             |             |   |             |             |             |   |             |             |             |                                                                                                                                                                                                                                                                                                                                                                                                                                                                                                                                                                                                                                                                                                                                                                                                                                                                                                                                                                                                                                                                                                                                                                                                                                                                                                                                                                                                                                                                                                                                                                                                                                                                                                                                                                           |            |             |             |            |            |             |             |            |            |            |            |             |            |             |             |             |            |             |             |             |            |             |             |            |            |             |             |            |            |             |            |            |            |             |             |            |            |            |            |            |            |            |            |                                                                                                                                                                                                                                                                                                                                                                                                                                                                                                                                                                                                                                                                                                                                                                                                                                                                                                                                                                                                                                                                                                                                                                                                                                                                                                                                                                                                                                                                                                                                                                                                                                                                                                                                                                                                                                                                                                                                                                                                                                                                                                                                                                                                                                                                                                                                                                                                                                                                                                                                                                                                                                                                            |   |            |             |             |   |            |             |             |   |            |             |            |   |            |             |            |   |            |             |            |   |            |             |             |   |             |             |             |   |             |             |             |   |             |             |             |   |             |             |             |                                                                                                                                                                                                                                                                                                                                                                                                                                                                                                                                                                                                                                                                                                                                                                                                                                                                                                                                                                                                                                                                                                                                                                                                                                                                                                                                                                                                                                                                                                                                                                                                                                                                                                                                                                            |            |             |             |            |            |             |             |            |            |             |             |             |            |            |            |             |            |             |             |             |            |             |             |            |             |             |             |            |             |             |             |            |             |            |            |            |             |            |            |            |            |            |             |             |             |             |             |             |             |             |             |             |             |             |             |            |             |             |             |            |             |             |             |            |             |             |             |            |             |             |             |             |             |             |             |             |             |             |            |             |             |             |             |             |             |             |             |                                                                                                                                                                                                                                                                                                                                                                                                                                                                                                                                                                                                                                                                                                                                                                                                                                                                                                                                                                                                                                                                                                                                                                                                                                                                                                                                                                                                                                                                                                                                                                                                                                                                                                                                                                                                                                                                                                                                                                                                                                                                                                                                                                                                                                                                                                                                                                                                                                                                                                                                                                                                                                                                         |   |            |             |            |   |            |            |            |   |            |             |            |   |            |            |            |   |            |            |            |   |            |            |             |   |            |            |             |   |            |             |             |   |            |            |             |   |            |             |            |   |            |             |            |   |            |             |             |   |            |             |             |   |            |             |            |   |            |             |            |   |            |             |             |   |             |            |            |   |             |            |            |   |             |            |             |   |             |            |             |   |            |            |            |   |             |             |            |   |             |            |            |   |             |             |             |   |             |             |            |   |             |            |            |   |             |             |             |   |             |             |             |   |             |             |             |   |             |            |            |   |             |             |             |   |             |             |             |
| O                 | -1.68514800                                                                                                                                                                                                                                                                                                                                                                                                                                                                                                                                                                                                                                                                                                                                                                                                                                                                                                                                                                                                                                                                                                                                                                                                                                                                                                                                                                                                                                                                                                                                                                                                                                                                                                                                                                                                                                                                                                                                                                                                                                                                                                                                                                                                                                                                                                                                                                                                                  | -0.09172800                                                                         | -0.39436300                                                                           |             |             |   |             |             |             |   |             |             |             |   |             |             |             |   |             |             |             |   |             |            |             |   |             |             |             |   |             |             |             |   |             |             |             |   |             |             |             |   |             |             |             |   |             |             |            |   |             |             |             |   |             |             |             |   |             |             |             |   |             |             |             |   |             |             |             |   |             |             |             |                                                                                                                                                                                                                                                                                                                                                                                                                                                                                                                                                                                                                                                                                                                                                                                                                                                                                                                                                                                                                                                                                                                                                                                                                                                                                                                                                                                                                                                                                                                                                                                                                                                                                                                                                                           |            |             |             |            |            |             |             |            |            |            |            |             |            |             |             |             |            |             |             |             |            |             |             |            |            |             |             |            |            |             |            |            |            |             |             |            |            |            |            |            |            |            |            |                                                                                                                                                                                                                                                                                                                                                                                                                                                                                                                                                                                                                                                                                                                                                                                                                                                                                                                                                                                                                                                                                                                                                                                                                                                                                                                                                                                                                                                                                                                                                                                                                                                                                                                                                                                                                                                                                                                                                                                                                                                                                                                                                                                                                                                                                                                                                                                                                                                                                                                                                                                                                                                                            |   |            |             |             |   |            |             |             |   |            |             |            |   |            |             |            |   |            |             |            |   |            |             |             |   |             |             |             |   |             |             |             |   |             |             |             |   |             |             |             |                                                                                                                                                                                                                                                                                                                                                                                                                                                                                                                                                                                                                                                                                                                                                                                                                                                                                                                                                                                                                                                                                                                                                                                                                                                                                                                                                                                                                                                                                                                                                                                                                                                                                                                                                                            |            |             |             |            |            |             |             |            |            |             |             |             |            |            |            |             |            |             |             |             |            |             |             |            |             |             |             |            |             |             |             |            |             |            |            |            |             |            |            |            |            |            |             |             |             |             |             |             |             |             |             |             |             |             |             |            |             |             |             |            |             |             |             |            |             |             |             |            |             |             |             |             |             |             |             |             |             |             |            |             |             |             |             |             |             |             |             |                                                                                                                                                                                                                                                                                                                                                                                                                                                                                                                                                                                                                                                                                                                                                                                                                                                                                                                                                                                                                                                                                                                                                                                                                                                                                                                                                                                                                                                                                                                                                                                                                                                                                                                                                                                                                                                                                                                                                                                                                                                                                                                                                                                                                                                                                                                                                                                                                                                                                                                                                                                                                                                                         |   |            |             |            |   |            |            |            |   |            |             |            |   |            |            |            |   |            |            |            |   |            |            |             |   |            |            |             |   |            |             |             |   |            |            |             |   |            |             |            |   |            |             |            |   |            |             |             |   |            |             |             |   |            |             |            |   |            |             |            |   |            |             |             |   |             |            |            |   |             |            |            |   |             |            |             |   |             |            |             |   |            |            |            |   |             |             |            |   |             |            |            |   |             |             |             |   |             |             |            |   |             |            |            |   |             |             |             |   |             |             |             |   |             |             |             |   |             |            |            |   |             |             |             |   |             |             |             |
| C                 | -2.93193800                                                                                                                                                                                                                                                                                                                                                                                                                                                                                                                                                                                                                                                                                                                                                                                                                                                                                                                                                                                                                                                                                                                                                                                                                                                                                                                                                                                                                                                                                                                                                                                                                                                                                                                                                                                                                                                                                                                                                                                                                                                                                                                                                                                                                                                                                                                                                                                                                  | -0.38955600                                                                         | 0.25324100                                                                            |             |             |   |             |             |             |   |             |             |             |   |             |             |             |   |             |             |             |   |             |            |             |   |             |             |             |   |             |             |             |   |             |             |             |   |             |             |             |   |             |             |             |   |             |             |            |   |             |             |             |   |             |             |             |   |             |             |             |   |             |             |             |   |             |             |             |   |             |             |             |                                                                                                                                                                                                                                                                                                                                                                                                                                                                                                                                                                                                                                                                                                                                                                                                                                                                                                                                                                                                                                                                                                                                                                                                                                                                                                                                                                                                                                                                                                                                                                                                                                                                                                                                                                           |            |             |             |            |            |             |             |            |            |            |            |             |            |             |             |             |            |             |             |             |            |             |             |            |            |             |             |            |            |             |            |            |            |             |             |            |            |            |            |            |            |            |            |                                                                                                                                                                                                                                                                                                                                                                                                                                                                                                                                                                                                                                                                                                                                                                                                                                                                                                                                                                                                                                                                                                                                                                                                                                                                                                                                                                                                                                                                                                                                                                                                                                                                                                                                                                                                                                                                                                                                                                                                                                                                                                                                                                                                                                                                                                                                                                                                                                                                                                                                                                                                                                                                            |   |            |             |             |   |            |             |             |   |            |             |            |   |            |             |            |   |            |             |            |   |            |             |             |   |             |             |             |   |             |             |             |   |             |             |             |   |             |             |             |                                                                                                                                                                                                                                                                                                                                                                                                                                                                                                                                                                                                                                                                                                                                                                                                                                                                                                                                                                                                                                                                                                                                                                                                                                                                                                                                                                                                                                                                                                                                                                                                                                                                                                                                                                            |            |             |             |            |            |             |             |            |            |             |             |             |            |            |            |             |            |             |             |             |            |             |             |            |             |             |             |            |             |             |             |            |             |            |            |            |             |            |            |            |            |            |             |             |             |             |             |             |             |             |             |             |             |             |             |            |             |             |             |            |             |             |             |            |             |             |             |            |             |             |             |             |             |             |             |             |             |             |            |             |             |             |             |             |             |             |             |                                                                                                                                                                                                                                                                                                                                                                                                                                                                                                                                                                                                                                                                                                                                                                                                                                                                                                                                                                                                                                                                                                                                                                                                                                                                                                                                                                                                                                                                                                                                                                                                                                                                                                                                                                                                                                                                                                                                                                                                                                                                                                                                                                                                                                                                                                                                                                                                                                                                                                                                                                                                                                                                         |   |            |             |            |   |            |            |            |   |            |             |            |   |            |            |            |   |            |            |            |   |            |            |             |   |            |            |             |   |            |             |             |   |            |            |             |   |            |             |            |   |            |             |            |   |            |             |             |   |            |             |             |   |            |             |            |   |            |             |            |   |            |             |             |   |             |            |            |   |             |            |            |   |             |            |             |   |             |            |             |   |            |            |            |   |             |             |            |   |             |            |            |   |             |             |             |   |             |             |            |   |             |            |            |   |             |             |             |   |             |             |             |   |             |             |             |   |             |            |            |   |             |             |             |   |             |             |             |
| H                 | -2.98285400                                                                                                                                                                                                                                                                                                                                                                                                                                                                                                                                                                                                                                                                                                                                                                                                                                                                                                                                                                                                                                                                                                                                                                                                                                                                                                                                                                                                                                                                                                                                                                                                                                                                                                                                                                                                                                                                                                                                                                                                                                                                                                                                                                                                                                                                                                                                                                                                                  | -1.46252600                                                                         | 0.44378800                                                                            |             |             |   |             |             |             |   |             |             |             |   |             |             |             |   |             |             |             |   |             |            |             |   |             |             |             |   |             |             |             |   |             |             |             |   |             |             |             |   |             |             |             |   |             |             |            |   |             |             |             |   |             |             |             |   |             |             |             |   |             |             |             |   |             |             |             |   |             |             |             |                                                                                                                                                                                                                                                                                                                                                                                                                                                                                                                                                                                                                                                                                                                                                                                                                                                                                                                                                                                                                                                                                                                                                                                                                                                                                                                                                                                                                                                                                                                                                                                                                                                                                                                                                                           |            |             |             |            |            |             |             |            |            |            |            |             |            |             |             |             |            |             |             |             |            |             |             |            |            |             |             |            |            |             |            |            |            |             |             |            |            |            |            |            |            |            |            |                                                                                                                                                                                                                                                                                                                                                                                                                                                                                                                                                                                                                                                                                                                                                                                                                                                                                                                                                                                                                                                                                                                                                                                                                                                                                                                                                                                                                                                                                                                                                                                                                                                                                                                                                                                                                                                                                                                                                                                                                                                                                                                                                                                                                                                                                                                                                                                                                                                                                                                                                                                                                                                                            |   |            |             |             |   |            |             |             |   |            |             |            |   |            |             |            |   |            |             |            |   |            |             |             |   |             |             |             |   |             |             |             |   |             |             |             |   |             |             |             |                                                                                                                                                                                                                                                                                                                                                                                                                                                                                                                                                                                                                                                                                                                                                                                                                                                                                                                                                                                                                                                                                                                                                                                                                                                                                                                                                                                                                                                                                                                                                                                                                                                                                                                                                                            |            |             |             |            |            |             |             |            |            |             |             |             |            |            |            |             |            |             |             |             |            |             |             |            |             |             |             |            |             |             |             |            |             |            |            |            |             |            |            |            |            |            |             |             |             |             |             |             |             |             |             |             |             |             |             |            |             |             |             |            |             |             |             |            |             |             |             |            |             |             |             |             |             |             |             |             |             |             |            |             |             |             |             |             |             |             |             |                                                                                                                                                                                                                                                                                                                                                                                                                                                                                                                                                                                                                                                                                                                                                                                                                                                                                                                                                                                                                                                                                                                                                                                                                                                                                                                                                                                                                                                                                                                                                                                                                                                                                                                                                                                                                                                                                                                                                                                                                                                                                                                                                                                                                                                                                                                                                                                                                                                                                                                                                                                                                                                                         |   |            |             |            |   |            |            |            |   |            |             |            |   |            |            |            |   |            |            |            |   |            |            |             |   |            |            |             |   |            |             |             |   |            |            |             |   |            |             |            |   |            |             |            |   |            |             |             |   |            |             |             |   |            |             |            |   |            |             |            |   |            |             |             |   |             |            |            |   |             |            |            |   |             |            |             |   |             |            |             |   |            |            |            |   |             |             |            |   |             |            |            |   |             |             |             |   |             |             |            |   |             |            |            |   |             |             |             |   |             |             |             |   |             |             |             |   |             |            |            |   |             |             |             |   |             |             |             |
| H                 | -2.95851500                                                                                                                                                                                                                                                                                                                                                                                                                                                                                                                                                                                                                                                                                                                                                                                                                                                                                                                                                                                                                                                                                                                                                                                                                                                                                                                                                                                                                                                                                                                                                                                                                                                                                                                                                                                                                                                                                                                                                                                                                                                                                                                                                                                                                                                                                                                                                                                                                  | 0.12769500                                                                          | 1.21353500                                                                            |             |             |   |             |             |             |   |             |             |             |   |             |             |             |   |             |             |             |   |             |            |             |   |             |             |             |   |             |             |             |   |             |             |             |   |             |             |             |   |             |             |             |   |             |             |            |   |             |             |             |   |             |             |             |   |             |             |             |   |             |             |             |   |             |             |             |   |             |             |             |                                                                                                                                                                                                                                                                                                                                                                                                                                                                                                                                                                                                                                                                                                                                                                                                                                                                                                                                                                                                                                                                                                                                                                                                                                                                                                                                                                                                                                                                                                                                                                                                                                                                                                                                                                           |            |             |             |            |            |             |             |            |            |            |            |             |            |             |             |             |            |             |             |             |            |             |             |            |            |             |             |            |            |             |            |            |            |             |             |            |            |            |            |            |            |            |            |                                                                                                                                                                                                                                                                                                                                                                                                                                                                                                                                                                                                                                                                                                                                                                                                                                                                                                                                                                                                                                                                                                                                                                                                                                                                                                                                                                                                                                                                                                                                                                                                                                                                                                                                                                                                                                                                                                                                                                                                                                                                                                                                                                                                                                                                                                                                                                                                                                                                                                                                                                                                                                                                            |   |            |             |             |   |            |             |             |   |            |             |            |   |            |             |            |   |            |             |            |   |            |             |             |   |             |             |             |   |             |             |             |   |             |             |             |   |             |             |             |                                                                                                                                                                                                                                                                                                                                                                                                                                                                                                                                                                                                                                                                                                                                                                                                                                                                                                                                                                                                                                                                                                                                                                                                                                                                                                                                                                                                                                                                                                                                                                                                                                                                                                                                                                            |            |             |             |            |            |             |             |            |            |             |             |             |            |            |            |             |            |             |             |             |            |             |             |            |             |             |             |            |             |             |             |            |             |            |            |            |             |            |            |            |            |            |             |             |             |             |             |             |             |             |             |             |             |             |             |            |             |             |             |            |             |             |             |            |             |             |             |            |             |             |             |             |             |             |             |             |             |             |            |             |             |             |             |             |             |             |             |                                                                                                                                                                                                                                                                                                                                                                                                                                                                                                                                                                                                                                                                                                                                                                                                                                                                                                                                                                                                                                                                                                                                                                                                                                                                                                                                                                                                                                                                                                                                                                                                                                                                                                                                                                                                                                                                                                                                                                                                                                                                                                                                                                                                                                                                                                                                                                                                                                                                                                                                                                                                                                                                         |   |            |             |            |   |            |            |            |   |            |             |            |   |            |            |            |   |            |            |            |   |            |            |             |   |            |            |             |   |            |             |             |   |            |            |             |   |            |             |            |   |            |             |            |   |            |             |             |   |            |             |             |   |            |             |            |   |            |             |            |   |            |             |             |   |             |            |            |   |             |            |            |   |             |            |             |   |             |            |             |   |            |            |            |   |             |             |            |   |             |            |            |   |             |             |             |   |             |             |            |   |             |            |            |   |             |             |             |   |             |             |             |   |             |             |             |   |             |            |            |   |             |             |             |   |             |             |             |
| C                 | 1.09407800                                                                                                                                                                                                                                                                                                                                                                                                                                                                                                                                                                                                                                                                                                                                                                                                                                                                                                                                                                                                                                                                                                                                                                                                                                                                                                                                                                                                                                                                                                                                                                                                                                                                                                                                                                                                                                                                                                                                                                                                                                                                                                                                                                                                                                                                                                                                                                                                                   | 1.49002900                                                                          | 0.02414800                                                                            |             |             |   |             |             |             |   |             |             |             |   |             |             |             |   |             |             |             |   |             |            |             |   |             |             |             |   |             |             |             |   |             |             |             |   |             |             |             |   |             |             |             |   |             |             |            |   |             |             |             |   |             |             |             |   |             |             |             |   |             |             |             |   |             |             |             |   |             |             |             |                                                                                                                                                                                                                                                                                                                                                                                                                                                                                                                                                                                                                                                                                                                                                                                                                                                                                                                                                                                                                                                                                                                                                                                                                                                                                                                                                                                                                                                                                                                                                                                                                                                                                                                                                                           |            |             |             |            |            |             |             |            |            |            |            |             |            |             |             |             |            |             |             |             |            |             |             |            |            |             |             |            |            |             |            |            |            |             |             |            |            |            |            |            |            |            |            |                                                                                                                                                                                                                                                                                                                                                                                                                                                                                                                                                                                                                                                                                                                                                                                                                                                                                                                                                                                                                                                                                                                                                                                                                                                                                                                                                                                                                                                                                                                                                                                                                                                                                                                                                                                                                                                                                                                                                                                                                                                                                                                                                                                                                                                                                                                                                                                                                                                                                                                                                                                                                                                                            |   |            |             |             |   |            |             |             |   |            |             |            |   |            |             |            |   |            |             |            |   |            |             |             |   |             |             |             |   |             |             |             |   |             |             |             |   |             |             |             |                                                                                                                                                                                                                                                                                                                                                                                                                                                                                                                                                                                                                                                                                                                                                                                                                                                                                                                                                                                                                                                                                                                                                                                                                                                                                                                                                                                                                                                                                                                                                                                                                                                                                                                                                                            |            |             |             |            |            |             |             |            |            |             |             |             |            |            |            |             |            |             |             |             |            |             |             |            |             |             |             |            |             |             |             |            |             |            |            |            |             |            |            |            |            |            |             |             |             |             |             |             |             |             |             |             |             |             |             |            |             |             |             |            |             |             |             |            |             |             |             |            |             |             |             |             |             |             |             |             |             |             |            |             |             |             |             |             |             |             |             |                                                                                                                                                                                                                                                                                                                                                                                                                                                                                                                                                                                                                                                                                                                                                                                                                                                                                                                                                                                                                                                                                                                                                                                                                                                                                                                                                                                                                                                                                                                                                                                                                                                                                                                                                                                                                                                                                                                                                                                                                                                                                                                                                                                                                                                                                                                                                                                                                                                                                                                                                                                                                                                                         |   |            |             |            |   |            |            |            |   |            |             |            |   |            |            |            |   |            |            |            |   |            |            |             |   |            |            |             |   |            |             |             |   |            |            |             |   |            |             |            |   |            |             |            |   |            |             |             |   |            |             |             |   |            |             |            |   |            |             |            |   |            |             |             |   |             |            |            |   |             |            |            |   |             |            |             |   |             |            |             |   |            |            |            |   |             |             |            |   |             |            |            |   |             |             |             |   |             |             |            |   |             |            |            |   |             |             |             |   |             |             |             |   |             |             |             |   |             |            |            |   |             |             |             |   |             |             |             |
| O                 | 0.29697000                                                                                                                                                                                                                                                                                                                                                                                                                                                                                                                                                                                                                                                                                                                                                                                                                                                                                                                                                                                                                                                                                                                                                                                                                                                                                                                                                                                                                                                                                                                                                                                                                                                                                                                                                                                                                                                                                                                                                                                                                                                                                                                                                                                                                                                                                                                                                                                                                   | 2.09849000                                                                          | 0.75418000                                                                            |             |             |   |             |             |             |   |             |             |             |   |             |             |             |   |             |             |             |   |             |            |             |   |             |             |             |   |             |             |             |   |             |             |             |   |             |             |             |   |             |             |             |   |             |             |            |   |             |             |             |   |             |             |             |   |             |             |             |   |             |             |             |   |             |             |             |   |             |             |             |                                                                                                                                                                                                                                                                                                                                                                                                                                                                                                                                                                                                                                                                                                                                                                                                                                                                                                                                                                                                                                                                                                                                                                                                                                                                                                                                                                                                                                                                                                                                                                                                                                                                                                                                                                           |            |             |             |            |            |             |             |            |            |            |            |             |            |             |             |             |            |             |             |             |            |             |             |            |            |             |             |            |            |             |            |            |            |             |             |            |            |            |            |            |            |            |            |                                                                                                                                                                                                                                                                                                                                                                                                                                                                                                                                                                                                                                                                                                                                                                                                                                                                                                                                                                                                                                                                                                                                                                                                                                                                                                                                                                                                                                                                                                                                                                                                                                                                                                                                                                                                                                                                                                                                                                                                                                                                                                                                                                                                                                                                                                                                                                                                                                                                                                                                                                                                                                                                            |   |            |             |             |   |            |             |             |   |            |             |            |   |            |             |            |   |            |             |            |   |            |             |             |   |             |             |             |   |             |             |             |   |             |             |             |   |             |             |             |                                                                                                                                                                                                                                                                                                                                                                                                                                                                                                                                                                                                                                                                                                                                                                                                                                                                                                                                                                                                                                                                                                                                                                                                                                                                                                                                                                                                                                                                                                                                                                                                                                                                                                                                                                            |            |             |             |            |            |             |             |            |            |             |             |             |            |            |            |             |            |             |             |             |            |             |             |            |             |             |             |            |             |             |             |            |             |            |            |            |             |            |            |            |            |            |             |             |             |             |             |             |             |             |             |             |             |             |             |            |             |             |             |            |             |             |             |            |             |             |             |            |             |             |             |             |             |             |             |             |             |             |            |             |             |             |             |             |             |             |             |                                                                                                                                                                                                                                                                                                                                                                                                                                                                                                                                                                                                                                                                                                                                                                                                                                                                                                                                                                                                                                                                                                                                                                                                                                                                                                                                                                                                                                                                                                                                                                                                                                                                                                                                                                                                                                                                                                                                                                                                                                                                                                                                                                                                                                                                                                                                                                                                                                                                                                                                                                                                                                                                         |   |            |             |            |   |            |            |            |   |            |             |            |   |            |            |            |   |            |            |            |   |            |            |             |   |            |            |             |   |            |             |             |   |            |            |             |   |            |             |            |   |            |             |            |   |            |             |             |   |            |             |             |   |            |             |            |   |            |             |            |   |            |             |             |   |             |            |            |   |             |            |            |   |             |            |             |   |             |            |             |   |            |            |            |   |             |             |            |   |             |            |            |   |             |             |             |   |             |             |            |   |             |            |            |   |             |             |             |   |             |             |             |   |             |             |             |   |             |            |            |   |             |             |             |   |             |             |             |
| O                 | 2.20787000                                                                                                                                                                                                                                                                                                                                                                                                                                                                                                                                                                                                                                                                                                                                                                                                                                                                                                                                                                                                                                                                                                                                                                                                                                                                                                                                                                                                                                                                                                                                                                                                                                                                                                                                                                                                                                                                                                                                                                                                                                                                                                                                                                                                                                                                                                                                                                                                                   | 1.84919500                                                                          | -0.39228900                                                                           |             |             |   |             |             |             |   |             |             |             |   |             |             |             |   |             |             |             |   |             |            |             |   |             |             |             |   |             |             |             |   |             |             |             |   |             |             |             |   |             |             |             |   |             |             |            |   |             |             |             |   |             |             |             |   |             |             |             |   |             |             |             |   |             |             |             |   |             |             |             |                                                                                                                                                                                                                                                                                                                                                                                                                                                                                                                                                                                                                                                                                                                                                                                                                                                                                                                                                                                                                                                                                                                                                                                                                                                                                                                                                                                                                                                                                                                                                                                                                                                                                                                                                                           |            |             |             |            |            |             |             |            |            |            |            |             |            |             |             |             |            |             |             |             |            |             |             |            |            |             |             |            |            |             |            |            |            |             |             |            |            |            |            |            |            |            |            |                                                                                                                                                                                                                                                                                                                                                                                                                                                                                                                                                                                                                                                                                                                                                                                                                                                                                                                                                                                                                                                                                                                                                                                                                                                                                                                                                                                                                                                                                                                                                                                                                                                                                                                                                                                                                                                                                                                                                                                                                                                                                                                                                                                                                                                                                                                                                                                                                                                                                                                                                                                                                                                                            |   |            |             |             |   |            |             |             |   |            |             |            |   |            |             |            |   |            |             |            |   |            |             |             |   |             |             |             |   |             |             |             |   |             |             |             |   |             |             |             |                                                                                                                                                                                                                                                                                                                                                                                                                                                                                                                                                                                                                                                                                                                                                                                                                                                                                                                                                                                                                                                                                                                                                                                                                                                                                                                                                                                                                                                                                                                                                                                                                                                                                                                                                                            |            |             |             |            |            |             |             |            |            |             |             |             |            |            |            |             |            |             |             |             |            |             |             |            |             |             |             |            |             |             |             |            |             |            |            |            |             |            |            |            |            |            |             |             |             |             |             |             |             |             |             |             |             |             |             |            |             |             |             |            |             |             |             |            |             |             |             |            |             |             |             |             |             |             |             |             |             |             |            |             |             |             |             |             |             |             |             |                                                                                                                                                                                                                                                                                                                                                                                                                                                                                                                                                                                                                                                                                                                                                                                                                                                                                                                                                                                                                                                                                                                                                                                                                                                                                                                                                                                                                                                                                                                                                                                                                                                                                                                                                                                                                                                                                                                                                                                                                                                                                                                                                                                                                                                                                                                                                                                                                                                                                                                                                                                                                                                                         |   |            |             |            |   |            |            |            |   |            |             |            |   |            |            |            |   |            |            |            |   |            |            |             |   |            |            |             |   |            |             |             |   |            |            |             |   |            |             |            |   |            |             |            |   |            |             |             |   |            |             |             |   |            |             |            |   |            |             |            |   |            |             |             |   |             |            |            |   |             |            |            |   |             |            |             |   |             |            |             |   |            |            |            |   |             |             |            |   |             |            |            |   |             |             |             |   |             |             |            |   |             |            |            |   |             |             |             |   |             |             |             |   |             |             |             |   |             |            |            |   |             |             |             |   |             |             |             |
| C                 | 1.83168900                                                                                                                                                                                                                                                                                                                                                                                                                                                                                                                                                                                                                                                                                                                                                                                                                                                                                                                                                                                                                                                                                                                                                                                                                                                                                                                                                                                                                                                                                                                                                                                                                                                                                                                                                                                                                                                                                                                                                                                                                                                                                                                                                                                                                                                                                                                                                                                                                   | -0.88676800                                                                         | -0.40651400                                                                           |             |             |   |             |             |             |   |             |             |             |   |             |             |             |   |             |             |             |   |             |            |             |   |             |             |             |   |             |             |             |   |             |             |             |   |             |             |             |   |             |             |             |   |             |             |            |   |             |             |             |   |             |             |             |   |             |             |             |   |             |             |             |   |             |             |             |   |             |             |             |                                                                                                                                                                                                                                                                                                                                                                                                                                                                                                                                                                                                                                                                                                                                                                                                                                                                                                                                                                                                                                                                                                                                                                                                                                                                                                                                                                                                                                                                                                                                                                                                                                                                                                                                                                           |            |             |             |            |            |             |             |            |            |            |            |             |            |             |             |             |            |             |             |             |            |             |             |            |            |             |             |            |            |             |            |            |            |             |             |            |            |            |            |            |            |            |            |                                                                                                                                                                                                                                                                                                                                                                                                                                                                                                                                                                                                                                                                                                                                                                                                                                                                                                                                                                                                                                                                                                                                                                                                                                                                                                                                                                                                                                                                                                                                                                                                                                                                                                                                                                                                                                                                                                                                                                                                                                                                                                                                                                                                                                                                                                                                                                                                                                                                                                                                                                                                                                                                            |   |            |             |             |   |            |             |             |   |            |             |            |   |            |             |            |   |            |             |            |   |            |             |             |   |             |             |             |   |             |             |             |   |             |             |             |   |             |             |             |                                                                                                                                                                                                                                                                                                                                                                                                                                                                                                                                                                                                                                                                                                                                                                                                                                                                                                                                                                                                                                                                                                                                                                                                                                                                                                                                                                                                                                                                                                                                                                                                                                                                                                                                                                            |            |             |             |            |            |             |             |            |            |             |             |             |            |            |            |             |            |             |             |             |            |             |             |            |             |             |             |            |             |             |             |            |             |            |            |            |             |            |            |            |            |            |             |             |             |             |             |             |             |             |             |             |             |             |             |            |             |             |             |            |             |             |             |            |             |             |             |            |             |             |             |             |             |             |             |             |             |             |            |             |             |             |             |             |             |             |             |                                                                                                                                                                                                                                                                                                                                                                                                                                                                                                                                                                                                                                                                                                                                                                                                                                                                                                                                                                                                                                                                                                                                                                                                                                                                                                                                                                                                                                                                                                                                                                                                                                                                                                                                                                                                                                                                                                                                                                                                                                                                                                                                                                                                                                                                                                                                                                                                                                                                                                                                                                                                                                                                         |   |            |             |            |   |            |            |            |   |            |             |            |   |            |            |            |   |            |            |            |   |            |            |             |   |            |            |             |   |            |             |             |   |            |            |             |   |            |             |            |   |            |             |            |   |            |             |             |   |            |             |             |   |            |             |            |   |            |             |            |   |            |             |             |   |             |            |            |   |             |            |            |   |             |            |             |   |             |            |             |   |            |            |            |   |             |             |            |   |             |            |            |   |             |             |             |   |             |             |            |   |             |            |            |   |             |             |             |   |             |             |             |   |             |             |             |   |             |            |            |   |             |             |             |   |             |             |             |
| O                 | 2.31500800                                                                                                                                                                                                                                                                                                                                                                                                                                                                                                                                                                                                                                                                                                                                                                                                                                                                                                                                                                                                                                                                                                                                                                                                                                                                                                                                                                                                                                                                                                                                                                                                                                                                                                                                                                                                                                                                                                                                                                                                                                                                                                                                                                                                                                                                                                                                                                                                                   | -1.33321700                                                                         | -1.42346100                                                                           |             |             |   |             |             |             |   |             |             |             |   |             |             |             |   |             |             |             |   |             |            |             |   |             |             |             |   |             |             |             |   |             |             |             |   |             |             |             |   |             |             |             |   |             |             |            |   |             |             |             |   |             |             |             |   |             |             |             |   |             |             |             |   |             |             |             |   |             |             |             |                                                                                                                                                                                                                                                                                                                                                                                                                                                                                                                                                                                                                                                                                                                                                                                                                                                                                                                                                                                                                                                                                                                                                                                                                                                                                                                                                                                                                                                                                                                                                                                                                                                                                                                                                                           |            |             |             |            |            |             |             |            |            |            |            |             |            |             |             |             |            |             |             |             |            |             |             |            |            |             |             |            |            |             |            |            |            |             |             |            |            |            |            |            |            |            |            |                                                                                                                                                                                                                                                                                                                                                                                                                                                                                                                                                                                                                                                                                                                                                                                                                                                                                                                                                                                                                                                                                                                                                                                                                                                                                                                                                                                                                                                                                                                                                                                                                                                                                                                                                                                                                                                                                                                                                                                                                                                                                                                                                                                                                                                                                                                                                                                                                                                                                                                                                                                                                                                                            |   |            |             |             |   |            |             |             |   |            |             |            |   |            |             |            |   |            |             |            |   |            |             |             |   |             |             |             |   |             |             |             |   |             |             |             |   |             |             |             |                                                                                                                                                                                                                                                                                                                                                                                                                                                                                                                                                                                                                                                                                                                                                                                                                                                                                                                                                                                                                                                                                                                                                                                                                                                                                                                                                                                                                                                                                                                                                                                                                                                                                                                                                                            |            |             |             |            |            |             |             |            |            |             |             |             |            |            |            |             |            |             |             |             |            |             |             |            |             |             |             |            |             |             |             |            |             |            |            |            |             |            |            |            |            |            |             |             |             |             |             |             |             |             |             |             |             |             |             |            |             |             |             |            |             |             |             |            |             |             |             |            |             |             |             |             |             |             |             |             |             |             |            |             |             |             |             |             |             |             |             |                                                                                                                                                                                                                                                                                                                                                                                                                                                                                                                                                                                                                                                                                                                                                                                                                                                                                                                                                                                                                                                                                                                                                                                                                                                                                                                                                                                                                                                                                                                                                                                                                                                                                                                                                                                                                                                                                                                                                                                                                                                                                                                                                                                                                                                                                                                                                                                                                                                                                                                                                                                                                                                                         |   |            |             |            |   |            |            |            |   |            |             |            |   |            |            |            |   |            |            |            |   |            |            |             |   |            |            |             |   |            |             |             |   |            |            |             |   |            |             |            |   |            |             |            |   |            |             |             |   |            |             |             |   |            |             |            |   |            |             |            |   |            |             |             |   |             |            |            |   |             |            |            |   |             |            |             |   |             |            |             |   |            |            |            |   |             |             |            |   |             |            |            |   |             |             |             |   |             |             |            |   |             |            |            |   |             |             |             |   |             |             |             |   |             |             |             |   |             |            |            |   |             |             |             |   |             |             |             |
| C                 | 2.39680800                                                                                                                                                                                                                                                                                                                                                                                                                                                                                                                                                                                                                                                                                                                                                                                                                                                                                                                                                                                                                                                                                                                                                                                                                                                                                                                                                                                                                                                                                                                                                                                                                                                                                                                                                                                                                                                                                                                                                                                                                                                                                                                                                                                                                                                                                                                                                                                                                   | -1.22920600                                                                         | 0.94368300                                                                            |             |             |   |             |             |             |   |             |             |             |   |             |             |             |   |             |             |             |   |             |            |             |   |             |             |             |   |             |             |             |   |             |             |             |   |             |             |             |   |             |             |             |   |             |             |            |   |             |             |             |   |             |             |             |   |             |             |             |   |             |             |             |   |             |             |             |   |             |             |             |                                                                                                                                                                                                                                                                                                                                                                                                                                                                                                                                                                                                                                                                                                                                                                                                                                                                                                                                                                                                                                                                                                                                                                                                                                                                                                                                                                                                                                                                                                                                                                                                                                                                                                                                                                           |            |             |             |            |            |             |             |            |            |            |            |             |            |             |             |             |            |             |             |             |            |             |             |            |            |             |             |            |            |             |            |            |            |             |             |            |            |            |            |            |            |            |            |                                                                                                                                                                                                                                                                                                                                                                                                                                                                                                                                                                                                                                                                                                                                                                                                                                                                                                                                                                                                                                                                                                                                                                                                                                                                                                                                                                                                                                                                                                                                                                                                                                                                                                                                                                                                                                                                                                                                                                                                                                                                                                                                                                                                                                                                                                                                                                                                                                                                                                                                                                                                                                                                            |   |            |             |             |   |            |             |             |   |            |             |            |   |            |             |            |   |            |             |            |   |            |             |             |   |             |             |             |   |             |             |             |   |             |             |             |   |             |             |             |                                                                                                                                                                                                                                                                                                                                                                                                                                                                                                                                                                                                                                                                                                                                                                                                                                                                                                                                                                                                                                                                                                                                                                                                                                                                                                                                                                                                                                                                                                                                                                                                                                                                                                                                                                            |            |             |             |            |            |             |             |            |            |             |             |             |            |            |            |             |            |             |             |             |            |             |             |            |             |             |             |            |             |             |             |            |             |            |            |            |             |            |            |            |            |            |             |             |             |             |             |             |             |             |             |             |             |             |             |            |             |             |             |            |             |             |             |            |             |             |             |            |             |             |             |             |             |             |             |             |             |             |            |             |             |             |             |             |             |             |             |                                                                                                                                                                                                                                                                                                                                                                                                                                                                                                                                                                                                                                                                                                                                                                                                                                                                                                                                                                                                                                                                                                                                                                                                                                                                                                                                                                                                                                                                                                                                                                                                                                                                                                                                                                                                                                                                                                                                                                                                                                                                                                                                                                                                                                                                                                                                                                                                                                                                                                                                                                                                                                                                         |   |            |             |            |   |            |            |            |   |            |             |            |   |            |            |            |   |            |            |            |   |            |            |             |   |            |            |             |   |            |             |             |   |            |            |             |   |            |             |            |   |            |             |            |   |            |             |             |   |            |             |             |   |            |             |            |   |            |             |            |   |            |             |             |   |             |            |            |   |             |            |            |   |             |            |             |   |             |            |             |   |            |            |            |   |             |             |            |   |             |            |            |   |             |             |             |   |             |             |            |   |             |            |            |   |             |             |             |   |             |             |             |   |             |             |             |   |             |            |            |   |             |             |             |   |             |             |             |
| H                 | 1.78013000                                                                                                                                                                                                                                                                                                                                                                                                                                                                                                                                                                                                                                                                                                                                                                                                                                                                                                                                                                                                                                                                                                                                                                                                                                                                                                                                                                                                                                                                                                                                                                                                                                                                                                                                                                                                                                                                                                                                                                                                                                                                                                                                                                                                                                                                                                                                                                                                                   | -2.01373300                                                                         | 1.38575500                                                                            |             |             |   |             |             |             |   |             |             |             |   |             |             |             |   |             |             |             |   |             |            |             |   |             |             |             |   |             |             |             |   |             |             |             |   |             |             |             |   |             |             |             |   |             |             |            |   |             |             |             |   |             |             |             |   |             |             |             |   |             |             |             |   |             |             |             |   |             |             |             |                                                                                                                                                                                                                                                                                                                                                                                                                                                                                                                                                                                                                                                                                                                                                                                                                                                                                                                                                                                                                                                                                                                                                                                                                                                                                                                                                                                                                                                                                                                                                                                                                                                                                                                                                                           |            |             |             |            |            |             |             |            |            |            |            |             |            |             |             |             |            |             |             |             |            |             |             |            |            |             |             |            |            |             |            |            |            |             |             |            |            |            |            |            |            |            |            |                                                                                                                                                                                                                                                                                                                                                                                                                                                                                                                                                                                                                                                                                                                                                                                                                                                                                                                                                                                                                                                                                                                                                                                                                                                                                                                                                                                                                                                                                                                                                                                                                                                                                                                                                                                                                                                                                                                                                                                                                                                                                                                                                                                                                                                                                                                                                                                                                                                                                                                                                                                                                                                                            |   |            |             |             |   |            |             |             |   |            |             |            |   |            |             |            |   |            |             |            |   |            |             |             |   |             |             |             |   |             |             |             |   |             |             |             |   |             |             |             |                                                                                                                                                                                                                                                                                                                                                                                                                                                                                                                                                                                                                                                                                                                                                                                                                                                                                                                                                                                                                                                                                                                                                                                                                                                                                                                                                                                                                                                                                                                                                                                                                                                                                                                                                                            |            |             |             |            |            |             |             |            |            |             |             |             |            |            |            |             |            |             |             |             |            |             |             |            |             |             |             |            |             |             |             |            |             |            |            |            |             |            |            |            |            |            |             |             |             |             |             |             |             |             |             |             |             |             |             |            |             |             |             |            |             |             |             |            |             |             |             |            |             |             |             |             |             |             |             |             |             |             |            |             |             |             |             |             |             |             |             |                                                                                                                                                                                                                                                                                                                                                                                                                                                                                                                                                                                                                                                                                                                                                                                                                                                                                                                                                                                                                                                                                                                                                                                                                                                                                                                                                                                                                                                                                                                                                                                                                                                                                                                                                                                                                                                                                                                                                                                                                                                                                                                                                                                                                                                                                                                                                                                                                                                                                                                                                                                                                                                                         |   |            |             |            |   |            |            |            |   |            |             |            |   |            |            |            |   |            |            |            |   |            |            |             |   |            |            |             |   |            |             |             |   |            |            |             |   |            |             |            |   |            |             |            |   |            |             |             |   |            |             |             |   |            |             |            |   |            |             |            |   |            |             |             |   |             |            |            |   |             |            |            |   |             |            |             |   |             |            |             |   |            |            |            |   |             |             |            |   |             |            |            |   |             |             |             |   |             |             |            |   |             |            |            |   |             |             |             |   |             |             |             |   |             |             |             |   |             |            |            |   |             |             |             |   |             |             |             |
| H                 | 3.41721000                                                                                                                                                                                                                                                                                                                                                                                                                                                                                                                                                                                                                                                                                                                                                                                                                                                                                                                                                                                                                                                                                                                                                                                                                                                                                                                                                                                                                                                                                                                                                                                                                                                                                                                                                                                                                                                                                                                                                                                                                                                                                                                                                                                                                                                                                                                                                                                                                   | -1.59035900                                                                         | 0.83291200                                                                            |             |             |   |             |             |             |   |             |             |             |   |             |             |             |   |             |             |             |   |             |            |             |   |             |             |             |   |             |             |             |   |             |             |             |   |             |             |             |   |             |             |             |   |             |             |            |   |             |             |             |   |             |             |             |   |             |             |             |   |             |             |             |   |             |             |             |   |             |             |             |                                                                                                                                                                                                                                                                                                                                                                                                                                                                                                                                                                                                                                                                                                                                                                                                                                                                                                                                                                                                                                                                                                                                                                                                                                                                                                                                                                                                                                                                                                                                                                                                                                                                                                                                                                           |            |             |             |            |            |             |             |            |            |            |            |             |            |             |             |             |            |             |             |             |            |             |             |            |            |             |             |            |            |             |            |            |            |             |             |            |            |            |            |            |            |            |            |                                                                                                                                                                                                                                                                                                                                                                                                                                                                                                                                                                                                                                                                                                                                                                                                                                                                                                                                                                                                                                                                                                                                                                                                                                                                                                                                                                                                                                                                                                                                                                                                                                                                                                                                                                                                                                                                                                                                                                                                                                                                                                                                                                                                                                                                                                                                                                                                                                                                                                                                                                                                                                                                            |   |            |             |             |   |            |             |             |   |            |             |            |   |            |             |            |   |            |             |            |   |            |             |             |   |             |             |             |   |             |             |             |   |             |             |             |   |             |             |             |                                                                                                                                                                                                                                                                                                                                                                                                                                                                                                                                                                                                                                                                                                                                                                                                                                                                                                                                                                                                                                                                                                                                                                                                                                                                                                                                                                                                                                                                                                                                                                                                                                                                                                                                                                            |            |             |             |            |            |             |             |            |            |             |             |             |            |            |            |             |            |             |             |             |            |             |             |            |             |             |             |            |             |             |             |            |             |            |            |            |             |            |            |            |            |            |             |             |             |             |             |             |             |             |             |             |             |             |             |            |             |             |             |            |             |             |             |            |             |             |             |            |             |             |             |             |             |             |             |             |             |             |            |             |             |             |             |             |             |             |             |                                                                                                                                                                                                                                                                                                                                                                                                                                                                                                                                                                                                                                                                                                                                                                                                                                                                                                                                                                                                                                                                                                                                                                                                                                                                                                                                                                                                                                                                                                                                                                                                                                                                                                                                                                                                                                                                                                                                                                                                                                                                                                                                                                                                                                                                                                                                                                                                                                                                                                                                                                                                                                                                         |   |            |             |            |   |            |            |            |   |            |             |            |   |            |            |            |   |            |            |            |   |            |            |             |   |            |            |             |   |            |             |             |   |            |            |             |   |            |             |            |   |            |             |            |   |            |             |             |   |            |             |             |   |            |             |            |   |            |             |            |   |            |             |             |   |             |            |            |   |             |            |            |   |             |            |             |   |             |            |             |   |            |            |            |   |             |             |            |   |             |            |            |   |             |             |             |   |             |             |            |   |             |            |            |   |             |             |             |   |             |             |             |   |             |             |             |   |             |            |            |   |             |             |             |   |             |             |             |
| H                 | 2.36234200                                                                                                                                                                                                                                                                                                                                                                                                                                                                                                                                                                                                                                                                                                                                                                                                                                                                                                                                                                                                                                                                                                                                                                                                                                                                                                                                                                                                                                                                                                                                                                                                                                                                                                                                                                                                                                                                                                                                                                                                                                                                                                                                                                                                                                                                                                                                                                                                                   | -0.37654200                                                                         | 1.62039200                                                                            |             |             |   |             |             |             |   |             |             |             |   |             |             |             |   |             |             |             |   |             |            |             |   |             |             |             |   |             |             |             |   |             |             |             |   |             |             |             |   |             |             |             |   |             |             |            |   |             |             |             |   |             |             |             |   |             |             |             |   |             |             |             |   |             |             |             |   |             |             |             |                                                                                                                                                                                                                                                                                                                                                                                                                                                                                                                                                                                                                                                                                                                                                                                                                                                                                                                                                                                                                                                                                                                                                                                                                                                                                                                                                                                                                                                                                                                                                                                                                                                                                                                                                                           |            |             |             |            |            |             |             |            |            |            |            |             |            |             |             |             |            |             |             |             |            |             |             |            |            |             |             |            |            |             |            |            |            |             |             |            |            |            |            |            |            |            |            |                                                                                                                                                                                                                                                                                                                                                                                                                                                                                                                                                                                                                                                                                                                                                                                                                                                                                                                                                                                                                                                                                                                                                                                                                                                                                                                                                                                                                                                                                                                                                                                                                                                                                                                                                                                                                                                                                                                                                                                                                                                                                                                                                                                                                                                                                                                                                                                                                                                                                                                                                                                                                                                                            |   |            |             |             |   |            |             |             |   |            |             |            |   |            |             |            |   |            |             |            |   |            |             |             |   |             |             |             |   |             |             |             |   |             |             |             |   |             |             |             |                                                                                                                                                                                                                                                                                                                                                                                                                                                                                                                                                                                                                                                                                                                                                                                                                                                                                                                                                                                                                                                                                                                                                                                                                                                                                                                                                                                                                                                                                                                                                                                                                                                                                                                                                                            |            |             |             |            |            |             |             |            |            |             |             |             |            |            |            |             |            |             |             |             |            |             |             |            |             |             |             |            |             |             |             |            |             |            |            |            |             |            |            |            |            |            |             |             |             |             |             |             |             |             |             |             |             |             |             |            |             |             |             |            |             |             |             |            |             |             |             |            |             |             |             |             |             |             |             |             |             |             |            |             |             |             |             |             |             |             |             |                                                                                                                                                                                                                                                                                                                                                                                                                                                                                                                                                                                                                                                                                                                                                                                                                                                                                                                                                                                                                                                                                                                                                                                                                                                                                                                                                                                                                                                                                                                                                                                                                                                                                                                                                                                                                                                                                                                                                                                                                                                                                                                                                                                                                                                                                                                                                                                                                                                                                                                                                                                                                                                                         |   |            |             |            |   |            |            |            |   |            |             |            |   |            |            |            |   |            |            |            |   |            |            |             |   |            |            |             |   |            |             |             |   |            |            |             |   |            |             |            |   |            |             |            |   |            |             |             |   |            |             |             |   |            |             |            |   |            |             |            |   |            |             |             |   |             |            |            |   |             |            |            |   |             |            |             |   |             |            |             |   |            |            |            |   |             |             |            |   |             |            |            |   |             |             |             |   |             |             |            |   |             |            |            |   |             |             |             |   |             |             |             |   |             |             |             |   |             |            |            |   |             |             |             |   |             |             |             |
| C                 | -4.04434600                                                                                                                                                                                                                                                                                                                                                                                                                                                                                                                                                                                                                                                                                                                                                                                                                                                                                                                                                                                                                                                                                                                                                                                                                                                                                                                                                                                                                                                                                                                                                                                                                                                                                                                                                                                                                                                                                                                                                                                                                                                                                                                                                                                                                                                                                                                                                                                                                  | 0.06796400                                                                          | -0.65651200                                                                           |             |             |   |             |             |             |   |             |             |             |   |             |             |             |   |             |             |             |   |             |            |             |   |             |             |             |   |             |             |             |   |             |             |             |   |             |             |             |   |             |             |             |   |             |             |            |   |             |             |             |   |             |             |             |   |             |             |             |   |             |             |             |   |             |             |             |   |             |             |             |                                                                                                                                                                                                                                                                                                                                                                                                                                                                                                                                                                                                                                                                                                                                                                                                                                                                                                                                                                                                                                                                                                                                                                                                                                                                                                                                                                                                                                                                                                                                                                                                                                                                                                                                                                           |            |             |             |            |            |             |             |            |            |            |            |             |            |             |             |             |            |             |             |             |            |             |             |            |            |             |             |            |            |             |            |            |            |             |             |            |            |            |            |            |            |            |            |                                                                                                                                                                                                                                                                                                                                                                                                                                                                                                                                                                                                                                                                                                                                                                                                                                                                                                                                                                                                                                                                                                                                                                                                                                                                                                                                                                                                                                                                                                                                                                                                                                                                                                                                                                                                                                                                                                                                                                                                                                                                                                                                                                                                                                                                                                                                                                                                                                                                                                                                                                                                                                                                            |   |            |             |             |   |            |             |             |   |            |             |            |   |            |             |            |   |            |             |            |   |            |             |             |   |             |             |             |   |             |             |             |   |             |             |             |   |             |             |             |                                                                                                                                                                                                                                                                                                                                                                                                                                                                                                                                                                                                                                                                                                                                                                                                                                                                                                                                                                                                                                                                                                                                                                                                                                                                                                                                                                                                                                                                                                                                                                                                                                                                                                                                                                            |            |             |             |            |            |             |             |            |            |             |             |             |            |            |            |             |            |             |             |             |            |             |             |            |             |             |             |            |             |             |             |            |             |            |            |            |             |            |            |            |            |            |             |             |             |             |             |             |             |             |             |             |             |             |             |            |             |             |             |            |             |             |             |            |             |             |             |            |             |             |             |             |             |             |             |             |             |             |            |             |             |             |             |             |             |             |             |                                                                                                                                                                                                                                                                                                                                                                                                                                                                                                                                                                                                                                                                                                                                                                                                                                                                                                                                                                                                                                                                                                                                                                                                                                                                                                                                                                                                                                                                                                                                                                                                                                                                                                                                                                                                                                                                                                                                                                                                                                                                                                                                                                                                                                                                                                                                                                                                                                                                                                                                                                                                                                                                         |   |            |             |            |   |            |            |            |   |            |             |            |   |            |            |            |   |            |            |            |   |            |            |             |   |            |            |             |   |            |             |             |   |            |            |             |   |            |             |            |   |            |             |            |   |            |             |             |   |            |             |             |   |            |             |            |   |            |             |            |   |            |             |             |   |             |            |            |   |             |            |            |   |             |            |             |   |             |            |             |   |            |            |            |   |             |             |            |   |             |            |            |   |             |             |             |   |             |             |            |   |             |            |            |   |             |             |             |   |             |             |             |   |             |             |             |   |             |            |            |   |             |             |             |   |             |             |             |
| H                 | -4.00680600                                                                                                                                                                                                                                                                                                                                                                                                                                                                                                                                                                                                                                                                                                                                                                                                                                                                                                                                                                                                                                                                                                                                                                                                                                                                                                                                                                                                                                                                                                                                                                                                                                                                                                                                                                                                                                                                                                                                                                                                                                                                                                                                                                                                                                                                                                                                                                                                                  | -0.45557300                                                                         | -1.61240500                                                                           |             |             |   |             |             |             |   |             |             |             |   |             |             |             |   |             |             |             |   |             |            |             |   |             |             |             |   |             |             |             |   |             |             |             |   |             |             |             |   |             |             |             |   |             |             |            |   |             |             |             |   |             |             |             |   |             |             |             |   |             |             |             |   |             |             |             |   |             |             |             |                                                                                                                                                                                                                                                                                                                                                                                                                                                                                                                                                                                                                                                                                                                                                                                                                                                                                                                                                                                                                                                                                                                                                                                                                                                                                                                                                                                                                                                                                                                                                                                                                                                                                                                                                                           |            |             |             |            |            |             |             |            |            |            |            |             |            |             |             |             |            |             |             |             |            |             |             |            |            |             |             |            |            |             |            |            |            |             |             |            |            |            |            |            |            |            |            |                                                                                                                                                                                                                                                                                                                                                                                                                                                                                                                                                                                                                                                                                                                                                                                                                                                                                                                                                                                                                                                                                                                                                                                                                                                                                                                                                                                                                                                                                                                                                                                                                                                                                                                                                                                                                                                                                                                                                                                                                                                                                                                                                                                                                                                                                                                                                                                                                                                                                                                                                                                                                                                                            |   |            |             |             |   |            |             |             |   |            |             |            |   |            |             |            |   |            |             |            |   |            |             |             |   |             |             |             |   |             |             |             |   |             |             |             |   |             |             |             |                                                                                                                                                                                                                                                                                                                                                                                                                                                                                                                                                                                                                                                                                                                                                                                                                                                                                                                                                                                                                                                                                                                                                                                                                                                                                                                                                                                                                                                                                                                                                                                                                                                                                                                                                                            |            |             |             |            |            |             |             |            |            |             |             |             |            |            |            |             |            |             |             |             |            |             |             |            |             |             |             |            |             |             |             |            |             |            |            |            |             |            |            |            |            |            |             |             |             |             |             |             |             |             |             |             |             |             |             |            |             |             |             |            |             |             |             |            |             |             |             |            |             |             |             |             |             |             |             |             |             |             |            |             |             |             |             |             |             |             |             |                                                                                                                                                                                                                                                                                                                                                                                                                                                                                                                                                                                                                                                                                                                                                                                                                                                                                                                                                                                                                                                                                                                                                                                                                                                                                                                                                                                                                                                                                                                                                                                                                                                                                                                                                                                                                                                                                                                                                                                                                                                                                                                                                                                                                                                                                                                                                                                                                                                                                                                                                                                                                                                                         |   |            |             |            |   |            |            |            |   |            |             |            |   |            |            |            |   |            |            |            |   |            |            |             |   |            |            |             |   |            |             |             |   |            |            |             |   |            |             |            |   |            |             |            |   |            |             |             |   |            |             |             |   |            |             |            |   |            |             |            |   |            |             |             |   |             |            |            |   |             |            |            |   |             |            |             |   |             |            |             |   |            |            |            |   |             |             |            |   |             |            |            |   |             |             |             |   |             |             |            |   |             |            |            |   |             |             |             |   |             |             |             |   |             |             |             |   |             |            |            |   |             |             |             |   |             |             |             |
| H                 | -5.00566700                                                                                                                                                                                                                                                                                                                                                                                                                                                                                                                                                                                                                                                                                                                                                                                                                                                                                                                                                                                                                                                                                                                                                                                                                                                                                                                                                                                                                                                                                                                                                                                                                                                                                                                                                                                                                                                                                                                                                                                                                                                                                                                                                                                                                                                                                                                                                                                                                  | -0.14313000                                                                         | -0.18689800                                                                           |             |             |   |             |             |             |   |             |             |             |   |             |             |             |   |             |             |             |   |             |            |             |   |             |             |             |   |             |             |             |   |             |             |             |   |             |             |             |   |             |             |             |   |             |             |            |   |             |             |             |   |             |             |             |   |             |             |             |   |             |             |             |   |             |             |             |   |             |             |             |                                                                                                                                                                                                                                                                                                                                                                                                                                                                                                                                                                                                                                                                                                                                                                                                                                                                                                                                                                                                                                                                                                                                                                                                                                                                                                                                                                                                                                                                                                                                                                                                                                                                                                                                                                           |            |             |             |            |            |             |             |            |            |            |            |             |            |             |             |             |            |             |             |             |            |             |             |            |            |             |             |            |            |             |            |            |            |             |             |            |            |            |            |            |            |            |            |                                                                                                                                                                                                                                                                                                                                                                                                                                                                                                                                                                                                                                                                                                                                                                                                                                                                                                                                                                                                                                                                                                                                                                                                                                                                                                                                                                                                                                                                                                                                                                                                                                                                                                                                                                                                                                                                                                                                                                                                                                                                                                                                                                                                                                                                                                                                                                                                                                                                                                                                                                                                                                                                            |   |            |             |             |   |            |             |             |   |            |             |            |   |            |             |            |   |            |             |            |   |            |             |             |   |             |             |             |   |             |             |             |   |             |             |             |   |             |             |             |                                                                                                                                                                                                                                                                                                                                                                                                                                                                                                                                                                                                                                                                                                                                                                                                                                                                                                                                                                                                                                                                                                                                                                                                                                                                                                                                                                                                                                                                                                                                                                                                                                                                                                                                                                            |            |             |             |            |            |             |             |            |            |             |             |             |            |            |            |             |            |             |             |             |            |             |             |            |             |             |             |            |             |             |             |            |             |            |            |            |             |            |            |            |            |            |             |             |             |             |             |             |             |             |             |             |             |             |             |            |             |             |             |            |             |             |             |            |             |             |             |            |             |             |             |             |             |             |             |             |             |             |            |             |             |             |             |             |             |             |             |                                                                                                                                                                                                                                                                                                                                                                                                                                                                                                                                                                                                                                                                                                                                                                                                                                                                                                                                                                                                                                                                                                                                                                                                                                                                                                                                                                                                                                                                                                                                                                                                                                                                                                                                                                                                                                                                                                                                                                                                                                                                                                                                                                                                                                                                                                                                                                                                                                                                                                                                                                                                                                                                         |   |            |             |            |   |            |            |            |   |            |             |            |   |            |            |            |   |            |            |            |   |            |            |             |   |            |            |             |   |            |             |             |   |            |            |             |   |            |             |            |   |            |             |            |   |            |             |             |   |            |             |             |   |            |             |            |   |            |             |            |   |            |             |             |   |             |            |            |   |             |            |            |   |             |            |             |   |             |            |             |   |            |            |            |   |             |             |            |   |             |            |            |   |             |             |             |   |             |             |            |   |             |            |            |   |             |             |             |   |             |             |             |   |             |             |             |   |             |            |            |   |             |             |             |   |             |             |             |
| H                 | -3.98012800                                                                                                                                                                                                                                                                                                                                                                                                                                                                                                                                                                                                                                                                                                                                                                                                                                                                                                                                                                                                                                                                                                                                                                                                                                                                                                                                                                                                                                                                                                                                                                                                                                                                                                                                                                                                                                                                                                                                                                                                                                                                                                                                                                                                                                                                                                                                                                                                                  | 1.14075000                                                                          | -0.84107200                                                                           |             |             |   |             |             |             |   |             |             |             |   |             |             |             |   |             |             |             |   |             |            |             |   |             |             |             |   |             |             |             |   |             |             |             |   |             |             |             |   |             |             |             |   |             |             |            |   |             |             |             |   |             |             |             |   |             |             |             |   |             |             |             |   |             |             |             |   |             |             |             |                                                                                                                                                                                                                                                                                                                                                                                                                                                                                                                                                                                                                                                                                                                                                                                                                                                                                                                                                                                                                                                                                                                                                                                                                                                                                                                                                                                                                                                                                                                                                                                                                                                                                                                                                                           |            |             |             |            |            |             |             |            |            |            |            |             |            |             |             |             |            |             |             |             |            |             |             |            |            |             |             |            |            |             |            |            |            |             |             |            |            |            |            |            |            |            |            |                                                                                                                                                                                                                                                                                                                                                                                                                                                                                                                                                                                                                                                                                                                                                                                                                                                                                                                                                                                                                                                                                                                                                                                                                                                                                                                                                                                                                                                                                                                                                                                                                                                                                                                                                                                                                                                                                                                                                                                                                                                                                                                                                                                                                                                                                                                                                                                                                                                                                                                                                                                                                                                                            |   |            |             |             |   |            |             |             |   |            |             |            |   |            |             |            |   |            |             |            |   |            |             |             |   |             |             |             |   |             |             |             |   |             |             |             |   |             |             |             |                                                                                                                                                                                                                                                                                                                                                                                                                                                                                                                                                                                                                                                                                                                                                                                                                                                                                                                                                                                                                                                                                                                                                                                                                                                                                                                                                                                                                                                                                                                                                                                                                                                                                                                                                                            |            |             |             |            |            |             |             |            |            |             |             |             |            |            |            |             |            |             |             |             |            |             |             |            |             |             |             |            |             |             |             |            |             |            |            |            |             |            |            |            |            |            |             |             |             |             |             |             |             |             |             |             |             |             |             |            |             |             |             |            |             |             |             |            |             |             |             |            |             |             |             |             |             |             |             |             |             |             |            |             |             |             |             |             |             |             |             |                                                                                                                                                                                                                                                                                                                                                                                                                                                                                                                                                                                                                                                                                                                                                                                                                                                                                                                                                                                                                                                                                                                                                                                                                                                                                                                                                                                                                                                                                                                                                                                                                                                                                                                                                                                                                                                                                                                                                                                                                                                                                                                                                                                                                                                                                                                                                                                                                                                                                                                                                                                                                                                                         |   |            |             |            |   |            |            |            |   |            |             |            |   |            |            |            |   |            |            |            |   |            |            |             |   |            |            |             |   |            |             |             |   |            |            |             |   |            |             |            |   |            |             |            |   |            |             |             |   |            |             |             |   |            |             |            |   |            |             |            |   |            |             |             |   |             |            |            |   |             |            |            |   |             |            |             |   |             |            |             |   |            |            |            |   |             |             |            |   |             |            |            |   |             |             |             |   |             |             |            |   |             |            |            |   |             |             |             |   |             |             |             |   |             |             |             |   |             |            |            |   |             |             |             |   |             |             |             |
| C                 | -0.56174000                                                                                                                                                                                                                                                                                                                                                                                                                                                                                                                                                                                                                                                                                                                                                                                                                                                                                                                                                                                                                                                                                                                                                                                                                                                                                                                                                                                                                                                                                                                                                                                                                                                                                                                                                                                                                                                                                                                                                                                                                                                                                                                                                                                                                                                                                                                                                                                                                  | -0.61757500                                                                         | 0.06384700                                                                            |             |             |   |             |             |             |   |             |             |             |   |             |             |             |   |             |             |             |   |             |            |             |   |             |             |             |   |             |             |             |   |             |             |             |   |             |             |             |   |             |             |             |   |             |             |            |   |             |             |             |   |             |             |             |   |             |             |             |   |             |             |             |   |             |             |             |   |             |             |             |                                                                                                                                                                                                                                                                                                                                                                                                                                                                                                                                                                                                                                                                                                                                                                                                                                                                                                                                                                                                                                                                                                                                                                                                                                                                                                                                                                                                                                                                                                                                                                                                                                                                                                                                                                           |            |             |             |            |            |             |             |            |            |            |            |             |            |             |             |             |            |             |             |             |            |             |             |            |            |             |             |            |            |             |            |            |            |             |             |            |            |            |            |            |            |            |            |                                                                                                                                                                                                                                                                                                                                                                                                                                                                                                                                                                                                                                                                                                                                                                                                                                                                                                                                                                                                                                                                                                                                                                                                                                                                                                                                                                                                                                                                                                                                                                                                                                                                                                                                                                                                                                                                                                                                                                                                                                                                                                                                                                                                                                                                                                                                                                                                                                                                                                                                                                                                                                                                            |   |            |             |             |   |            |             |             |   |            |             |            |   |            |             |            |   |            |             |            |   |            |             |             |   |             |             |             |   |             |             |             |   |             |             |             |   |             |             |             |                                                                                                                                                                                                                                                                                                                                                                                                                                                                                                                                                                                                                                                                                                                                                                                                                                                                                                                                                                                                                                                                                                                                                                                                                                                                                                                                                                                                                                                                                                                                                                                                                                                                                                                                                                            |            |             |             |            |            |             |             |            |            |             |             |             |            |            |            |             |            |             |             |             |            |             |             |            |             |             |             |            |             |             |             |            |             |            |            |            |             |            |            |            |            |            |             |             |             |             |             |             |             |             |             |             |             |             |             |            |             |             |             |            |             |             |             |            |             |             |             |            |             |             |             |             |             |             |             |             |             |             |            |             |             |             |             |             |             |             |             |                                                                                                                                                                                                                                                                                                                                                                                                                                                                                                                                                                                                                                                                                                                                                                                                                                                                                                                                                                                                                                                                                                                                                                                                                                                                                                                                                                                                                                                                                                                                                                                                                                                                                                                                                                                                                                                                                                                                                                                                                                                                                                                                                                                                                                                                                                                                                                                                                                                                                                                                                                                                                                                                         |   |            |             |            |   |            |            |            |   |            |             |            |   |            |            |            |   |            |            |            |   |            |            |             |   |            |            |             |   |            |             |             |   |            |            |             |   |            |             |            |   |            |             |            |   |            |             |             |   |            |             |             |   |            |             |            |   |            |             |            |   |            |             |             |   |             |            |            |   |             |            |            |   |             |            |             |   |             |            |             |   |            |            |            |   |             |             |            |   |             |            |            |   |             |             |             |   |             |             |            |   |             |            |            |   |             |             |             |   |             |             |             |   |             |             |             |   |             |            |            |   |             |             |             |   |             |             |             |
| O                 | -0.62105400                                                                                                                                                                                                                                                                                                                                                                                                                                                                                                                                                                                                                                                                                                                                                                                                                                                                                                                                                                                                                                                                                                                                                                                                                                                                                                                                                                                                                                                                                                                                                                                                                                                                                                                                                                                                                                                                                                                                                                                                                                                                                                                                                                                                                                                                                                                                                                                                                  | -1.35306400                                                                         | 1.03434800                                                                            |             |             |   |             |             |             |   |             |             |             |   |             |             |             |   |             |             |             |   |             |            |             |   |             |             |             |   |             |             |             |   |             |             |             |   |             |             |             |   |             |             |             |   |             |             |            |   |             |             |             |   |             |             |             |   |             |             |             |   |             |             |             |   |             |             |             |   |             |             |             |                                                                                                                                                                                                                                                                                                                                                                                                                                                                                                                                                                                                                                                                                                                                                                                                                                                                                                                                                                                                                                                                                                                                                                                                                                                                                                                                                                                                                                                                                                                                                                                                                                                                                                                                                                           |            |             |             |            |            |             |             |            |            |            |            |             |            |             |             |             |            |             |             |             |            |             |             |            |            |             |             |            |            |             |            |            |            |             |             |            |            |            |            |            |            |            |            |                                                                                                                                                                                                                                                                                                                                                                                                                                                                                                                                                                                                                                                                                                                                                                                                                                                                                                                                                                                                                                                                                                                                                                                                                                                                                                                                                                                                                                                                                                                                                                                                                                                                                                                                                                                                                                                                                                                                                                                                                                                                                                                                                                                                                                                                                                                                                                                                                                                                                                                                                                                                                                                                            |   |            |             |             |   |            |             |             |   |            |             |            |   |            |             |            |   |            |             |            |   |            |             |             |   |             |             |             |   |             |             |             |   |             |             |             |   |             |             |             |                                                                                                                                                                                                                                                                                                                                                                                                                                                                                                                                                                                                                                                                                                                                                                                                                                                                                                                                                                                                                                                                                                                                                                                                                                                                                                                                                                                                                                                                                                                                                                                                                                                                                                                                                                            |            |             |             |            |            |             |             |            |            |             |             |             |            |            |            |             |            |             |             |             |            |             |             |            |             |             |             |            |             |             |             |            |             |            |            |            |             |            |            |            |            |            |             |             |             |             |             |             |             |             |             |             |             |             |             |            |             |             |             |            |             |             |             |            |             |             |             |            |             |             |             |             |             |             |             |             |             |             |            |             |             |             |             |             |             |             |             |                                                                                                                                                                                                                                                                                                                                                                                                                                                                                                                                                                                                                                                                                                                                                                                                                                                                                                                                                                                                                                                                                                                                                                                                                                                                                                                                                                                                                                                                                                                                                                                                                                                                                                                                                                                                                                                                                                                                                                                                                                                                                                                                                                                                                                                                                                                                                                                                                                                                                                                                                                                                                                                                         |   |            |             |            |   |            |            |            |   |            |             |            |   |            |            |            |   |            |            |            |   |            |            |             |   |            |            |             |   |            |             |             |   |            |            |             |   |            |             |            |   |            |             |            |   |            |             |             |   |            |             |             |   |            |             |            |   |            |             |            |   |            |             |             |   |             |            |            |   |             |            |            |   |             |            |             |   |             |            |             |   |            |            |            |   |             |             |            |   |             |            |            |   |             |             |             |   |             |             |            |   |             |            |            |   |             |             |             |   |             |             |             |   |             |             |             |   |             |            |            |   |             |             |             |   |             |             |             |
| C                 | 0.60468600                                                                                                                                                                                                                                                                                                                                                                                                                                                                                                                                                                                                                                                                                                                                                                                                                                                                                                                                                                                                                                                                                                                                                                                                                                                                                                                                                                                                                                                                                                                                                                                                                                                                                                                                                                                                                                                                                                                                                                                                                                                                                                                                                                                                                                                                                                                                                                                                                   | -0.15715300                                                                         | -0.64600200                                                                           |             |             |   |             |             |             |   |             |             |             |   |             |             |             |   |             |             |             |   |             |            |             |   |             |             |             |   |             |             |             |   |             |             |             |   |             |             |             |   |             |             |             |   |             |             |            |   |             |             |             |   |             |             |             |   |             |             |             |   |             |             |             |   |             |             |             |   |             |             |             |                                                                                                                                                                                                                                                                                                                                                                                                                                                                                                                                                                                                                                                                                                                                                                                                                                                                                                                                                                                                                                                                                                                                                                                                                                                                                                                                                                                                                                                                                                                                                                                                                                                                                                                                                                           |            |             |             |            |            |             |             |            |            |            |            |             |            |             |             |             |            |             |             |             |            |             |             |            |            |             |             |            |            |             |            |            |            |             |             |            |            |            |            |            |            |            |            |                                                                                                                                                                                                                                                                                                                                                                                                                                                                                                                                                                                                                                                                                                                                                                                                                                                                                                                                                                                                                                                                                                                                                                                                                                                                                                                                                                                                                                                                                                                                                                                                                                                                                                                                                                                                                                                                                                                                                                                                                                                                                                                                                                                                                                                                                                                                                                                                                                                                                                                                                                                                                                                                            |   |            |             |             |   |            |             |             |   |            |             |            |   |            |             |            |   |            |             |            |   |            |             |             |   |             |             |             |   |             |             |             |   |             |             |             |   |             |             |             |                                                                                                                                                                                                                                                                                                                                                                                                                                                                                                                                                                                                                                                                                                                                                                                                                                                                                                                                                                                                                                                                                                                                                                                                                                                                                                                                                                                                                                                                                                                                                                                                                                                                                                                                                                            |            |             |             |            |            |             |             |            |            |             |             |             |            |            |            |             |            |             |             |             |            |             |             |            |             |             |             |            |             |             |             |            |             |            |            |            |             |            |            |            |            |            |             |             |             |             |             |             |             |             |             |             |             |             |             |            |             |             |             |            |             |             |             |            |             |             |             |            |             |             |             |             |             |             |             |             |             |             |            |             |             |             |             |             |             |             |             |                                                                                                                                                                                                                                                                                                                                                                                                                                                                                                                                                                                                                                                                                                                                                                                                                                                                                                                                                                                                                                                                                                                                                                                                                                                                                                                                                                                                                                                                                                                                                                                                                                                                                                                                                                                                                                                                                                                                                                                                                                                                                                                                                                                                                                                                                                                                                                                                                                                                                                                                                                                                                                                                         |   |            |             |            |   |            |            |            |   |            |             |            |   |            |            |            |   |            |            |            |   |            |            |             |   |            |            |             |   |            |             |             |   |            |            |             |   |            |             |            |   |            |             |            |   |            |             |             |   |            |             |             |   |            |             |            |   |            |             |            |   |            |             |             |   |             |            |            |   |             |            |            |   |             |            |             |   |             |            |             |   |            |            |            |   |             |             |            |   |             |            |            |   |             |             |             |   |             |             |            |   |             |            |            |   |             |             |             |   |             |             |             |   |             |             |             |   |             |            |            |   |             |             |             |   |             |             |             |
| H                 | 0.39785000                                                                                                                                                                                                                                                                                                                                                                                                                                                                                                                                                                                                                                                                                                                                                                                                                                                                                                                                                                                                                                                                                                                                                                                                                                                                                                                                                                                                                                                                                                                                                                                                                                                                                                                                                                                                                                                                                                                                                                                                                                                                                                                                                                                                                                                                                                                                                                                                                   | 0.31662700                                                                          | -1.59645200                                                                           |             |             |   |             |             |             |   |             |             |             |   |             |             |             |   |             |             |             |   |             |            |             |   |             |             |             |   |             |             |             |   |             |             |             |   |             |             |             |   |             |             |             |   |             |             |            |   |             |             |             |   |             |             |             |   |             |             |             |   |             |             |             |   |             |             |             |   |             |             |             |                                                                                                                                                                                                                                                                                                                                                                                                                                                                                                                                                                                                                                                                                                                                                                                                                                                                                                                                                                                                                                                                                                                                                                                                                                                                                                                                                                                                                                                                                                                                                                                                                                                                                                                                                                           |            |             |             |            |            |             |             |            |            |            |            |             |            |             |             |             |            |             |             |             |            |             |             |            |            |             |             |            |            |             |            |            |            |             |             |            |            |            |            |            |            |            |            |                                                                                                                                                                                                                                                                                                                                                                                                                                                                                                                                                                                                                                                                                                                                                                                                                                                                                                                                                                                                                                                                                                                                                                                                                                                                                                                                                                                                                                                                                                                                                                                                                                                                                                                                                                                                                                                                                                                                                                                                                                                                                                                                                                                                                                                                                                                                                                                                                                                                                                                                                                                                                                                                            |   |            |             |             |   |            |             |             |   |            |             |            |   |            |             |            |   |            |             |            |   |            |             |             |   |             |             |             |   |             |             |             |   |             |             |             |   |             |             |             |                                                                                                                                                                                                                                                                                                                                                                                                                                                                                                                                                                                                                                                                                                                                                                                                                                                                                                                                                                                                                                                                                                                                                                                                                                                                                                                                                                                                                                                                                                                                                                                                                                                                                                                                                                            |            |             |             |            |            |             |             |            |            |             |             |             |            |            |            |             |            |             |             |             |            |             |             |            |             |             |             |            |             |             |             |            |             |            |            |            |             |            |            |            |            |            |             |             |             |             |             |             |             |             |             |             |             |             |             |            |             |             |             |            |             |             |             |            |             |             |             |            |             |             |             |             |             |             |             |             |             |             |            |             |             |             |             |             |             |             |             |                                                                                                                                                                                                                                                                                                                                                                                                                                                                                                                                                                                                                                                                                                                                                                                                                                                                                                                                                                                                                                                                                                                                                                                                                                                                                                                                                                                                                                                                                                                                                                                                                                                                                                                                                                                                                                                                                                                                                                                                                                                                                                                                                                                                                                                                                                                                                                                                                                                                                                                                                                                                                                                                         |   |            |             |            |   |            |            |            |   |            |             |            |   |            |            |            |   |            |            |            |   |            |            |             |   |            |            |             |   |            |             |             |   |            |            |             |   |            |             |            |   |            |             |            |   |            |             |             |   |            |             |             |   |            |             |            |   |            |             |            |   |            |             |             |   |             |            |            |   |             |            |            |   |             |            |             |   |             |            |             |   |            |            |            |   |             |             |            |   |             |            |            |   |             |             |             |   |             |             |            |   |             |            |            |   |             |             |             |   |             |             |             |   |             |             |             |   |             |            |            |   |             |             |             |   |             |             |             |
| O                 | -1.69198500                                                                                                                                                                                                                                                                                                                                                                                                                                                                                                                                                                                                                                                                                                                                                                                                                                                                                                                                                                                                                                                                                                                                                                                                                                                                                                                                                                                                                                                                                                                                                                                                                                                                                                                                                                                                                                                                                                                                                                                                                                                                                                                                                                                                                                                                                                                                                                                                                  | -0.07794500                                                                         | -0.46835300                                                                           |             |             |   |             |             |             |   |             |             |             |   |             |             |             |   |             |             |             |   |             |            |             |   |             |             |             |   |             |             |             |   |             |             |             |   |             |             |             |   |             |             |             |   |             |             |            |   |             |             |             |   |             |             |             |   |             |             |             |   |             |             |             |   |             |             |             |   |             |             |             |                                                                                                                                                                                                                                                                                                                                                                                                                                                                                                                                                                                                                                                                                                                                                                                                                                                                                                                                                                                                                                                                                                                                                                                                                                                                                                                                                                                                                                                                                                                                                                                                                                                                                                                                                                           |            |             |             |            |            |             |             |            |            |            |            |             |            |             |             |             |            |             |             |             |            |             |             |            |            |             |             |            |            |             |            |            |            |             |             |            |            |            |            |            |            |            |            |                                                                                                                                                                                                                                                                                                                                                                                                                                                                                                                                                                                                                                                                                                                                                                                                                                                                                                                                                                                                                                                                                                                                                                                                                                                                                                                                                                                                                                                                                                                                                                                                                                                                                                                                                                                                                                                                                                                                                                                                                                                                                                                                                                                                                                                                                                                                                                                                                                                                                                                                                                                                                                                                            |   |            |             |             |   |            |             |             |   |            |             |            |   |            |             |            |   |            |             |            |   |            |             |             |   |             |             |             |   |             |             |             |   |             |             |             |   |             |             |             |                                                                                                                                                                                                                                                                                                                                                                                                                                                                                                                                                                                                                                                                                                                                                                                                                                                                                                                                                                                                                                                                                                                                                                                                                                                                                                                                                                                                                                                                                                                                                                                                                                                                                                                                                                            |            |             |             |            |            |             |             |            |            |             |             |             |            |            |            |             |            |             |             |             |            |             |             |            |             |             |             |            |             |             |             |            |             |            |            |            |             |            |            |            |            |            |             |             |             |             |             |             |             |             |             |             |             |             |             |            |             |             |             |            |             |             |             |            |             |             |             |            |             |             |             |             |             |             |             |             |             |             |            |             |             |             |             |             |             |             |             |                                                                                                                                                                                                                                                                                                                                                                                                                                                                                                                                                                                                                                                                                                                                                                                                                                                                                                                                                                                                                                                                                                                                                                                                                                                                                                                                                                                                                                                                                                                                                                                                                                                                                                                                                                                                                                                                                                                                                                                                                                                                                                                                                                                                                                                                                                                                                                                                                                                                                                                                                                                                                                                                         |   |            |             |            |   |            |            |            |   |            |             |            |   |            |            |            |   |            |            |            |   |            |            |             |   |            |            |             |   |            |             |             |   |            |            |             |   |            |             |            |   |            |             |            |   |            |             |             |   |            |             |             |   |            |             |            |   |            |             |            |   |            |             |             |   |             |            |            |   |             |            |            |   |             |            |             |   |             |            |             |   |            |            |            |   |             |             |            |   |             |            |            |   |             |             |             |   |             |             |            |   |             |            |            |   |             |             |             |   |             |             |             |   |             |             |             |   |             |            |            |   |             |             |             |   |             |             |             |
| C                 | -2.92483900                                                                                                                                                                                                                                                                                                                                                                                                                                                                                                                                                                                                                                                                                                                                                                                                                                                                                                                                                                                                                                                                                                                                                                                                                                                                                                                                                                                                                                                                                                                                                                                                                                                                                                                                                                                                                                                                                                                                                                                                                                                                                                                                                                                                                                                                                                                                                                                                                  | -0.40753400                                                                         | 0.16818100                                                                            |             |             |   |             |             |             |   |             |             |             |   |             |             |             |   |             |             |             |   |             |            |             |   |             |             |             |   |             |             |             |   |             |             |             |   |             |             |             |   |             |             |             |   |             |             |            |   |             |             |             |   |             |             |             |   |             |             |             |   |             |             |             |   |             |             |             |   |             |             |             |                                                                                                                                                                                                                                                                                                                                                                                                                                                                                                                                                                                                                                                                                                                                                                                                                                                                                                                                                                                                                                                                                                                                                                                                                                                                                                                                                                                                                                                                                                                                                                                                                                                                                                                                                                           |            |             |             |            |            |             |             |            |            |            |            |             |            |             |             |             |            |             |             |             |            |             |             |            |            |             |             |            |            |             |            |            |            |             |             |            |            |            |            |            |            |            |            |                                                                                                                                                                                                                                                                                                                                                                                                                                                                                                                                                                                                                                                                                                                                                                                                                                                                                                                                                                                                                                                                                                                                                                                                                                                                                                                                                                                                                                                                                                                                                                                                                                                                                                                                                                                                                                                                                                                                                                                                                                                                                                                                                                                                                                                                                                                                                                                                                                                                                                                                                                                                                                                                            |   |            |             |             |   |            |             |             |   |            |             |            |   |            |             |            |   |            |             |            |   |            |             |             |   |             |             |             |   |             |             |             |   |             |             |             |   |             |             |             |                                                                                                                                                                                                                                                                                                                                                                                                                                                                                                                                                                                                                                                                                                                                                                                                                                                                                                                                                                                                                                                                                                                                                                                                                                                                                                                                                                                                                                                                                                                                                                                                                                                                                                                                                                            |            |             |             |            |            |             |             |            |            |             |             |             |            |            |            |             |            |             |             |             |            |             |             |            |             |             |             |            |             |             |             |            |             |            |            |            |             |            |            |            |            |            |             |             |             |             |             |             |             |             |             |             |             |             |             |            |             |             |             |            |             |             |             |            |             |             |             |            |             |             |             |             |             |             |             |             |             |             |            |             |             |             |             |             |             |             |             |                                                                                                                                                                                                                                                                                                                                                                                                                                                                                                                                                                                                                                                                                                                                                                                                                                                                                                                                                                                                                                                                                                                                                                                                                                                                                                                                                                                                                                                                                                                                                                                                                                                                                                                                                                                                                                                                                                                                                                                                                                                                                                                                                                                                                                                                                                                                                                                                                                                                                                                                                                                                                                                                         |   |            |             |            |   |            |            |            |   |            |             |            |   |            |            |            |   |            |            |            |   |            |            |             |   |            |            |             |   |            |             |             |   |            |            |             |   |            |             |            |   |            |             |            |   |            |             |             |   |            |             |             |   |            |             |            |   |            |             |            |   |            |             |             |   |             |            |            |   |             |            |            |   |             |            |             |   |             |            |             |   |            |            |            |   |             |             |            |   |             |            |            |   |             |             |             |   |             |             |            |   |             |            |            |   |             |             |             |   |             |             |             |   |             |             |             |   |             |            |            |   |             |             |             |   |             |             |             |
| H                 | -3.06839100                                                                                                                                                                                                                                                                                                                                                                                                                                                                                                                                                                                                                                                                                                                                                                                                                                                                                                                                                                                                                                                                                                                                                                                                                                                                                                                                                                                                                                                                                                                                                                                                                                                                                                                                                                                                                                                                                                                                                                                                                                                                                                                                                                                                                                                                                                                                                                                                                  | -1.49005200                                                                         | 0.14604000                                                                            |             |             |   |             |             |             |   |             |             |             |   |             |             |             |   |             |             |             |   |             |            |             |   |             |             |             |   |             |             |             |   |             |             |             |   |             |             |             |   |             |             |             |   |             |             |            |   |             |             |             |   |             |             |             |   |             |             |             |   |             |             |             |   |             |             |             |   |             |             |             |                                                                                                                                                                                                                                                                                                                                                                                                                                                                                                                                                                                                                                                                                                                                                                                                                                                                                                                                                                                                                                                                                                                                                                                                                                                                                                                                                                                                                                                                                                                                                                                                                                                                                                                                                                           |            |             |             |            |            |             |             |            |            |            |            |             |            |             |             |             |            |             |             |             |            |             |             |            |            |             |             |            |            |             |            |            |            |             |             |            |            |            |            |            |            |            |            |                                                                                                                                                                                                                                                                                                                                                                                                                                                                                                                                                                                                                                                                                                                                                                                                                                                                                                                                                                                                                                                                                                                                                                                                                                                                                                                                                                                                                                                                                                                                                                                                                                                                                                                                                                                                                                                                                                                                                                                                                                                                                                                                                                                                                                                                                                                                                                                                                                                                                                                                                                                                                                                                            |   |            |             |             |   |            |             |             |   |            |             |            |   |            |             |            |   |            |             |            |   |            |             |             |   |             |             |             |   |             |             |             |   |             |             |             |   |             |             |             |                                                                                                                                                                                                                                                                                                                                                                                                                                                                                                                                                                                                                                                                                                                                                                                                                                                                                                                                                                                                                                                                                                                                                                                                                                                                                                                                                                                                                                                                                                                                                                                                                                                                                                                                                                            |            |             |             |            |            |             |             |            |            |             |             |             |            |            |            |             |            |             |             |             |            |             |             |            |             |             |             |            |             |             |             |            |             |            |            |            |             |            |            |            |            |            |             |             |             |             |             |             |             |             |             |             |             |             |             |            |             |             |             |            |             |             |             |            |             |             |             |            |             |             |             |             |             |             |             |             |             |             |            |             |             |             |             |             |             |             |             |                                                                                                                                                                                                                                                                                                                                                                                                                                                                                                                                                                                                                                                                                                                                                                                                                                                                                                                                                                                                                                                                                                                                                                                                                                                                                                                                                                                                                                                                                                                                                                                                                                                                                                                                                                                                                                                                                                                                                                                                                                                                                                                                                                                                                                                                                                                                                                                                                                                                                                                                                                                                                                                                         |   |            |             |            |   |            |            |            |   |            |             |            |   |            |            |            |   |            |            |            |   |            |            |             |   |            |            |             |   |            |             |             |   |            |            |             |   |            |             |            |   |            |             |            |   |            |             |             |   |            |             |             |   |            |             |            |   |            |             |            |   |            |             |             |   |             |            |            |   |             |            |            |   |             |            |             |   |             |            |             |   |            |            |            |   |             |             |            |   |             |            |            |   |             |             |             |   |             |             |            |   |             |            |            |   |             |             |             |   |             |             |             |   |             |             |             |   |             |            |            |   |             |             |             |   |             |             |             |
| H                 | -2.88752000                                                                                                                                                                                                                                                                                                                                                                                                                                                                                                                                                                                                                                                                                                                                                                                                                                                                                                                                                                                                                                                                                                                                                                                                                                                                                                                                                                                                                                                                                                                                                                                                                                                                                                                                                                                                                                                                                                                                                                                                                                                                                                                                                                                                                                                                                                                                                                                                                  | -0.09901200                                                                         | 1.21513000                                                                            |             |             |   |             |             |             |   |             |             |             |   |             |             |             |   |             |             |             |   |             |            |             |   |             |             |             |   |             |             |             |   |             |             |             |   |             |             |             |   |             |             |             |   |             |             |            |   |             |             |             |   |             |             |             |   |             |             |             |   |             |             |             |   |             |             |             |   |             |             |             |                                                                                                                                                                                                                                                                                                                                                                                                                                                                                                                                                                                                                                                                                                                                                                                                                                                                                                                                                                                                                                                                                                                                                                                                                                                                                                                                                                                                                                                                                                                                                                                                                                                                                                                                                                           |            |             |             |            |            |             |             |            |            |            |            |             |            |             |             |             |            |             |             |             |            |             |             |            |            |             |             |            |            |             |            |            |            |             |             |            |            |            |            |            |            |            |            |                                                                                                                                                                                                                                                                                                                                                                                                                                                                                                                                                                                                                                                                                                                                                                                                                                                                                                                                                                                                                                                                                                                                                                                                                                                                                                                                                                                                                                                                                                                                                                                                                                                                                                                                                                                                                                                                                                                                                                                                                                                                                                                                                                                                                                                                                                                                                                                                                                                                                                                                                                                                                                                                            |   |            |             |             |   |            |             |             |   |            |             |            |   |            |             |            |   |            |             |            |   |            |             |             |   |             |             |             |   |             |             |             |   |             |             |             |   |             |             |             |                                                                                                                                                                                                                                                                                                                                                                                                                                                                                                                                                                                                                                                                                                                                                                                                                                                                                                                                                                                                                                                                                                                                                                                                                                                                                                                                                                                                                                                                                                                                                                                                                                                                                                                                                                            |            |             |             |            |            |             |             |            |            |             |             |             |            |            |            |             |            |             |             |             |            |             |             |            |             |             |             |            |             |             |             |            |             |            |            |            |             |            |            |            |            |            |             |             |             |             |             |             |             |             |             |             |             |             |             |            |             |             |             |            |             |             |             |            |             |             |             |            |             |             |             |             |             |             |             |             |             |             |            |             |             |             |             |             |             |             |             |                                                                                                                                                                                                                                                                                                                                                                                                                                                                                                                                                                                                                                                                                                                                                                                                                                                                                                                                                                                                                                                                                                                                                                                                                                                                                                                                                                                                                                                                                                                                                                                                                                                                                                                                                                                                                                                                                                                                                                                                                                                                                                                                                                                                                                                                                                                                                                                                                                                                                                                                                                                                                                                                         |   |            |             |            |   |            |            |            |   |            |             |            |   |            |            |            |   |            |            |            |   |            |            |             |   |            |            |             |   |            |             |             |   |            |            |             |   |            |             |            |   |            |             |            |   |            |             |             |   |            |             |             |   |            |             |            |   |            |             |            |   |            |             |             |   |             |            |            |   |             |            |            |   |             |            |             |   |             |            |             |   |            |            |            |   |             |             |            |   |             |            |            |   |             |             |             |   |             |             |            |   |             |            |            |   |             |             |             |   |             |             |             |   |             |             |             |   |             |            |            |   |             |             |             |   |             |             |             |
| C                 | 1.06751500                                                                                                                                                                                                                                                                                                                                                                                                                                                                                                                                                                                                                                                                                                                                                                                                                                                                                                                                                                                                                                                                                                                                                                                                                                                                                                                                                                                                                                                                                                                                                                                                                                                                                                                                                                                                                                                                                                                                                                                                                                                                                                                                                                                                                                                                                                                                                                                                                   | 1.68293900                                                                          | 0.44618900                                                                            |             |             |   |             |             |             |   |             |             |             |   |             |             |             |   |             |             |             |   |             |            |             |   |             |             |             |   |             |             |             |   |             |             |             |   |             |             |             |   |             |             |             |   |             |             |            |   |             |             |             |   |             |             |             |   |             |             |             |   |             |             |             |   |             |             |             |   |             |             |             |                                                                                                                                                                                                                                                                                                                                                                                                                                                                                                                                                                                                                                                                                                                                                                                                                                                                                                                                                                                                                                                                                                                                                                                                                                                                                                                                                                                                                                                                                                                                                                                                                                                                                                                                                                           |            |             |             |            |            |             |             |            |            |            |            |             |            |             |             |             |            |             |             |             |            |             |             |            |            |             |             |            |            |             |            |            |            |             |             |            |            |            |            |            |            |            |            |                                                                                                                                                                                                                                                                                                                                                                                                                                                                                                                                                                                                                                                                                                                                                                                                                                                                                                                                                                                                                                                                                                                                                                                                                                                                                                                                                                                                                                                                                                                                                                                                                                                                                                                                                                                                                                                                                                                                                                                                                                                                                                                                                                                                                                                                                                                                                                                                                                                                                                                                                                                                                                                                            |   |            |             |             |   |            |             |             |   |            |             |            |   |            |             |            |   |            |             |            |   |            |             |             |   |             |             |             |   |             |             |             |   |             |             |             |   |             |             |             |                                                                                                                                                                                                                                                                                                                                                                                                                                                                                                                                                                                                                                                                                                                                                                                                                                                                                                                                                                                                                                                                                                                                                                                                                                                                                                                                                                                                                                                                                                                                                                                                                                                                                                                                                                            |            |             |             |            |            |             |             |            |            |             |             |             |            |            |            |             |            |             |             |             |            |             |             |            |             |             |             |            |             |             |             |            |             |            |            |            |             |            |            |            |            |            |             |             |             |             |             |             |             |             |             |             |             |             |             |            |             |             |             |            |             |             |             |            |             |             |             |            |             |             |             |             |             |             |             |             |             |             |            |             |             |             |             |             |             |             |             |                                                                                                                                                                                                                                                                                                                                                                                                                                                                                                                                                                                                                                                                                                                                                                                                                                                                                                                                                                                                                                                                                                                                                                                                                                                                                                                                                                                                                                                                                                                                                                                                                                                                                                                                                                                                                                                                                                                                                                                                                                                                                                                                                                                                                                                                                                                                                                                                                                                                                                                                                                                                                                                                         |   |            |             |            |   |            |            |            |   |            |             |            |   |            |            |            |   |            |            |            |   |            |            |             |   |            |            |             |   |            |             |             |   |            |            |             |   |            |             |            |   |            |             |            |   |            |             |             |   |            |             |             |   |            |             |            |   |            |             |            |   |            |             |             |   |             |            |            |   |             |            |            |   |             |            |             |   |             |            |             |   |            |            |            |   |             |             |            |   |             |            |            |   |             |             |             |   |             |             |            |   |             |            |            |   |             |             |             |   |             |             |             |   |             |             |             |   |             |            |            |   |             |             |             |   |             |             |             |
| O                 | 0.84469500                                                                                                                                                                                                                                                                                                                                                                                                                                                                                                                                                                                                                                                                                                                                                                                                                                                                                                                                                                                                                                                                                                                                                                                                                                                                                                                                                                                                                                                                                                                                                                                                                                                                                                                                                                                                                                                                                                                                                                                                                                                                                                                                                                                                                                                                                                                                                                                                                   | 1.45785700                                                                          | 1.58669800                                                                            |             |             |   |             |             |             |   |             |             |             |   |             |             |             |   |             |             |             |   |             |            |             |   |             |             |             |   |             |             |             |   |             |             |             |   |             |             |             |   |             |             |             |   |             |             |            |   |             |             |             |   |             |             |             |   |             |             |             |   |             |             |             |   |             |             |             |   |             |             |             |                                                                                                                                                                                                                                                                                                                                                                                                                                                                                                                                                                                                                                                                                                                                                                                                                                                                                                                                                                                                                                                                                                                                                                                                                                                                                                                                                                                                                                                                                                                                                                                                                                                                                                                                                                           |            |             |             |            |            |             |             |            |            |            |            |             |            |             |             |             |            |             |             |             |            |             |             |            |            |             |             |            |            |             |            |            |            |             |             |            |            |            |            |            |            |            |            |                                                                                                                                                                                                                                                                                                                                                                                                                                                                                                                                                                                                                                                                                                                                                                                                                                                                                                                                                                                                                                                                                                                                                                                                                                                                                                                                                                                                                                                                                                                                                                                                                                                                                                                                                                                                                                                                                                                                                                                                                                                                                                                                                                                                                                                                                                                                                                                                                                                                                                                                                                                                                                                                            |   |            |             |             |   |            |             |             |   |            |             |            |   |            |             |            |   |            |             |            |   |            |             |             |   |             |             |             |   |             |             |             |   |             |             |             |   |             |             |             |                                                                                                                                                                                                                                                                                                                                                                                                                                                                                                                                                                                                                                                                                                                                                                                                                                                                                                                                                                                                                                                                                                                                                                                                                                                                                                                                                                                                                                                                                                                                                                                                                                                                                                                                                                            |            |             |             |            |            |             |             |            |            |             |             |             |            |            |            |             |            |             |             |             |            |             |             |            |             |             |             |            |             |             |             |            |             |            |            |            |             |            |            |            |            |            |             |             |             |             |             |             |             |             |             |             |             |             |             |            |             |             |             |            |             |             |             |            |             |             |             |            |             |             |             |             |             |             |             |             |             |             |            |             |             |             |             |             |             |             |             |                                                                                                                                                                                                                                                                                                                                                                                                                                                                                                                                                                                                                                                                                                                                                                                                                                                                                                                                                                                                                                                                                                                                                                                                                                                                                                                                                                                                                                                                                                                                                                                                                                                                                                                                                                                                                                                                                                                                                                                                                                                                                                                                                                                                                                                                                                                                                                                                                                                                                                                                                                                                                                                                         |   |            |             |            |   |            |            |            |   |            |             |            |   |            |            |            |   |            |            |            |   |            |            |             |   |            |            |             |   |            |             |             |   |            |            |             |   |            |             |            |   |            |             |            |   |            |             |             |   |            |             |             |   |            |             |            |   |            |             |            |   |            |             |             |   |             |            |            |   |             |            |            |   |             |            |             |   |             |            |             |   |            |            |            |   |             |             |            |   |             |            |            |   |             |             |             |   |             |             |            |   |             |            |            |   |             |             |             |   |             |             |             |   |             |             |             |   |             |            |            |   |             |             |             |   |             |             |             |
| O                 | 1.41522500                                                                                                                                                                                                                                                                                                                                                                                                                                                                                                                                                                                                                                                                                                                                                                                                                                                                                                                                                                                                                                                                                                                                                                                                                                                                                                                                                                                                                                                                                                                                                                                                                                                                                                                                                                                                                                                                                                                                                                                                                                                                                                                                                                                                                                                                                                                                                                                                                   | 2.41603100                                                                          | -0.41551900                                                                           |             |             |   |             |             |             |   |             |             |             |   |             |             |             |   |             |             |             |   |             |            |             |   |             |             |             |   |             |             |             |   |             |             |             |   |             |             |             |   |             |             |             |   |             |             |            |   |             |             |             |   |             |             |             |   |             |             |             |   |             |             |             |   |             |             |             |   |             |             |             |                                                                                                                                                                                                                                                                                                                                                                                                                                                                                                                                                                                                                                                                                                                                                                                                                                                                                                                                                                                                                                                                                                                                                                                                                                                                                                                                                                                                                                                                                                                                                                                                                                                                                                                                                                           |            |             |             |            |            |             |             |            |            |            |            |             |            |             |             |             |            |             |             |             |            |             |             |            |            |             |             |            |            |             |            |            |            |             |             |            |            |            |            |            |            |            |            |                                                                                                                                                                                                                                                                                                                                                                                                                                                                                                                                                                                                                                                                                                                                                                                                                                                                                                                                                                                                                                                                                                                                                                                                                                                                                                                                                                                                                                                                                                                                                                                                                                                                                                                                                                                                                                                                                                                                                                                                                                                                                                                                                                                                                                                                                                                                                                                                                                                                                                                                                                                                                                                                            |   |            |             |             |   |            |             |             |   |            |             |            |   |            |             |            |   |            |             |            |   |            |             |             |   |             |             |             |   |             |             |             |   |             |             |             |   |             |             |             |                                                                                                                                                                                                                                                                                                                                                                                                                                                                                                                                                                                                                                                                                                                                                                                                                                                                                                                                                                                                                                                                                                                                                                                                                                                                                                                                                                                                                                                                                                                                                                                                                                                                                                                                                                            |            |             |             |            |            |             |             |            |            |             |             |             |            |            |            |             |            |             |             |             |            |             |             |            |             |             |             |            |             |             |             |            |             |            |            |            |             |            |            |            |            |            |             |             |             |             |             |             |             |             |             |             |             |             |             |            |             |             |             |            |             |             |             |            |             |             |             |            |             |             |             |             |             |             |             |             |             |             |            |             |             |             |             |             |             |             |             |                                                                                                                                                                                                                                                                                                                                                                                                                                                                                                                                                                                                                                                                                                                                                                                                                                                                                                                                                                                                                                                                                                                                                                                                                                                                                                                                                                                                                                                                                                                                                                                                                                                                                                                                                                                                                                                                                                                                                                                                                                                                                                                                                                                                                                                                                                                                                                                                                                                                                                                                                                                                                                                                         |   |            |             |            |   |            |            |            |   |            |             |            |   |            |            |            |   |            |            |            |   |            |            |             |   |            |            |             |   |            |             |             |   |            |            |             |   |            |             |            |   |            |             |            |   |            |             |             |   |            |             |             |   |            |             |            |   |            |             |            |   |            |             |             |   |             |            |            |   |             |            |            |   |             |            |             |   |             |            |             |   |            |            |            |   |             |             |            |   |             |            |            |   |             |             |             |   |             |             |            |   |             |            |            |   |             |             |             |   |             |             |             |   |             |             |             |   |             |            |            |   |             |             |             |   |             |             |             |
| C                 | 1.90055500                                                                                                                                                                                                                                                                                                                                                                                                                                                                                                                                                                                                                                                                                                                                                                                                                                                                                                                                                                                                                                                                                                                                                                                                                                                                                                                                                                                                                                                                                                                                                                                                                                                                                                                                                                                                                                                                                                                                                                                                                                                                                                                                                                                                                                                                                                                                                                                                                   | -0.77098400                                                                         | -0.55810100                                                                           |             |             |   |             |             |             |   |             |             |             |   |             |             |             |   |             |             |             |   |             |            |             |   |             |             |             |   |             |             |             |   |             |             |             |   |             |             |             |   |             |             |             |   |             |             |            |   |             |             |             |   |             |             |             |   |             |             |             |   |             |             |             |   |             |             |             |   |             |             |             |                                                                                                                                                                                                                                                                                                                                                                                                                                                                                                                                                                                                                                                                                                                                                                                                                                                                                                                                                                                                                                                                                                                                                                                                                                                                                                                                                                                                                                                                                                                                                                                                                                                                                                                                                                           |            |             |             |            |            |             |             |            |            |            |            |             |            |             |             |             |            |             |             |             |            |             |             |            |            |             |             |            |            |             |            |            |            |             |             |            |            |            |            |            |            |            |            |                                                                                                                                                                                                                                                                                                                                                                                                                                                                                                                                                                                                                                                                                                                                                                                                                                                                                                                                                                                                                                                                                                                                                                                                                                                                                                                                                                                                                                                                                                                                                                                                                                                                                                                                                                                                                                                                                                                                                                                                                                                                                                                                                                                                                                                                                                                                                                                                                                                                                                                                                                                                                                                                            |   |            |             |             |   |            |             |             |   |            |             |            |   |            |             |            |   |            |             |            |   |            |             |             |   |             |             |             |   |             |             |             |   |             |             |             |   |             |             |             |                                                                                                                                                                                                                                                                                                                                                                                                                                                                                                                                                                                                                                                                                                                                                                                                                                                                                                                                                                                                                                                                                                                                                                                                                                                                                                                                                                                                                                                                                                                                                                                                                                                                                                                                                                            |            |             |             |            |            |             |             |            |            |             |             |             |            |            |            |             |            |             |             |             |            |             |             |            |             |             |             |            |             |             |             |            |             |            |            |            |             |            |            |            |            |            |             |             |             |             |             |             |             |             |             |             |             |             |             |            |             |             |             |            |             |             |             |            |             |             |             |            |             |             |             |             |             |             |             |             |             |             |            |             |             |             |             |             |             |             |             |                                                                                                                                                                                                                                                                                                                                                                                                                                                                                                                                                                                                                                                                                                                                                                                                                                                                                                                                                                                                                                                                                                                                                                                                                                                                                                                                                                                                                                                                                                                                                                                                                                                                                                                                                                                                                                                                                                                                                                                                                                                                                                                                                                                                                                                                                                                                                                                                                                                                                                                                                                                                                                                                         |   |            |             |            |   |            |            |            |   |            |             |            |   |            |            |            |   |            |            |            |   |            |            |             |   |            |            |             |   |            |             |             |   |            |            |             |   |            |             |            |   |            |             |            |   |            |             |             |   |            |             |             |   |            |             |            |   |            |             |            |   |            |             |             |   |             |            |            |   |             |            |            |   |             |            |             |   |             |            |             |   |            |            |            |   |             |             |            |   |             |            |            |   |             |             |             |   |             |             |            |   |             |            |            |   |             |             |             |   |             |             |             |   |             |             |             |   |             |            |            |   |             |             |             |   |             |             |             |
| O                 | 2.75628400                                                                                                                                                                                                                                                                                                                                                                                                                                                                                                                                                                                                                                                                                                                                                                                                                                                                                                                                                                                                                                                                                                                                                                                                                                                                                                                                                                                                                                                                                                                                                                                                                                                                                                                                                                                                                                                                                                                                                                                                                                                                                                                                                                                                                                                                                                                                                                                                                   | -0.58611300                                                                         | -1.43261900                                                                           |             |             |   |             |             |             |   |             |             |             |   |             |             |             |   |             |             |             |   |             |            |             |   |             |             |             |   |             |             |             |   |             |             |             |   |             |             |             |   |             |             |             |   |             |             |            |   |             |             |             |   |             |             |             |   |             |             |             |   |             |             |             |   |             |             |             |   |             |             |             |                                                                                                                                                                                                                                                                                                                                                                                                                                                                                                                                                                                                                                                                                                                                                                                                                                                                                                                                                                                                                                                                                                                                                                                                                                                                                                                                                                                                                                                                                                                                                                                                                                                                                                                                                                           |            |             |             |            |            |             |             |            |            |            |            |             |            |             |             |             |            |             |             |             |            |             |             |            |            |             |             |            |            |             |            |            |            |             |             |            |            |            |            |            |            |            |            |                                                                                                                                                                                                                                                                                                                                                                                                                                                                                                                                                                                                                                                                                                                                                                                                                                                                                                                                                                                                                                                                                                                                                                                                                                                                                                                                                                                                                                                                                                                                                                                                                                                                                                                                                                                                                                                                                                                                                                                                                                                                                                                                                                                                                                                                                                                                                                                                                                                                                                                                                                                                                                                                            |   |            |             |             |   |            |             |             |   |            |             |            |   |            |             |            |   |            |             |            |   |            |             |             |   |             |             |             |   |             |             |             |   |             |             |             |   |             |             |             |                                                                                                                                                                                                                                                                                                                                                                                                                                                                                                                                                                                                                                                                                                                                                                                                                                                                                                                                                                                                                                                                                                                                                                                                                                                                                                                                                                                                                                                                                                                                                                                                                                                                                                                                                                            |            |             |             |            |            |             |             |            |            |             |             |             |            |            |            |             |            |             |             |             |            |             |             |            |             |             |             |            |             |             |             |            |             |            |            |            |             |            |            |            |            |            |             |             |             |             |             |             |             |             |             |             |             |             |             |            |             |             |             |            |             |             |             |            |             |             |             |            |             |             |             |             |             |             |             |             |             |             |            |             |             |             |             |             |             |             |             |                                                                                                                                                                                                                                                                                                                                                                                                                                                                                                                                                                                                                                                                                                                                                                                                                                                                                                                                                                                                                                                                                                                                                                                                                                                                                                                                                                                                                                                                                                                                                                                                                                                                                                                                                                                                                                                                                                                                                                                                                                                                                                                                                                                                                                                                                                                                                                                                                                                                                                                                                                                                                                                                         |   |            |             |            |   |            |            |            |   |            |             |            |   |            |            |            |   |            |            |            |   |            |            |             |   |            |            |             |   |            |             |             |   |            |            |             |   |            |             |            |   |            |             |            |   |            |             |             |   |            |             |             |   |            |             |            |   |            |             |            |   |            |             |             |   |             |            |            |   |             |            |            |   |             |            |             |   |             |            |             |   |            |            |            |   |             |             |            |   |             |            |            |   |             |             |             |   |             |             |            |   |             |            |            |   |             |             |             |   |             |             |             |   |             |             |             |   |             |            |            |   |             |             |             |   |             |             |             |
| C                 | 2.25764800                                                                                                                                                                                                                                                                                                                                                                                                                                                                                                                                                                                                                                                                                                                                                                                                                                                                                                                                                                                                                                                                                                                                                                                                                                                                                                                                                                                                                                                                                                                                                                                                                                                                                                                                                                                                                                                                                                                                                                                                                                                                                                                                                                                                                                                                                                                                                                                                                   | -1.62002400                                                                         | 0.64169300                                                                            |             |             |   |             |             |             |   |             |             |             |   |             |             |             |   |             |             |             |   |             |            |             |   |             |             |             |   |             |             |             |   |             |             |             |   |             |             |             |   |             |             |             |   |             |             |            |   |             |             |             |   |             |             |             |   |             |             |             |   |             |             |             |   |             |             |             |   |             |             |             |                                                                                                                                                                                                                                                                                                                                                                                                                                                                                                                                                                                                                                                                                                                                                                                                                                                                                                                                                                                                                                                                                                                                                                                                                                                                                                                                                                                                                                                                                                                                                                                                                                                                                                                                                                           |            |             |             |            |            |             |             |            |            |            |            |             |            |             |             |             |            |             |             |             |            |             |             |            |            |             |             |            |            |             |            |            |            |             |             |            |            |            |            |            |            |            |            |                                                                                                                                                                                                                                                                                                                                                                                                                                                                                                                                                                                                                                                                                                                                                                                                                                                                                                                                                                                                                                                                                                                                                                                                                                                                                                                                                                                                                                                                                                                                                                                                                                                                                                                                                                                                                                                                                                                                                                                                                                                                                                                                                                                                                                                                                                                                                                                                                                                                                                                                                                                                                                                                            |   |            |             |             |   |            |             |             |   |            |             |            |   |            |             |            |   |            |             |            |   |            |             |             |   |             |             |             |   |             |             |             |   |             |             |             |   |             |             |             |                                                                                                                                                                                                                                                                                                                                                                                                                                                                                                                                                                                                                                                                                                                                                                                                                                                                                                                                                                                                                                                                                                                                                                                                                                                                                                                                                                                                                                                                                                                                                                                                                                                                                                                                                                            |            |             |             |            |            |             |             |            |            |             |             |             |            |            |            |             |            |             |             |             |            |             |             |            |             |             |             |            |             |             |             |            |             |            |            |            |             |            |            |            |            |            |             |             |             |             |             |             |             |             |             |             |             |             |             |            |             |             |             |            |             |             |             |            |             |             |             |            |             |             |             |             |             |             |             |             |             |             |            |             |             |             |             |             |             |             |             |                                                                                                                                                                                                                                                                                                                                                                                                                                                                                                                                                                                                                                                                                                                                                                                                                                                                                                                                                                                                                                                                                                                                                                                                                                                                                                                                                                                                                                                                                                                                                                                                                                                                                                                                                                                                                                                                                                                                                                                                                                                                                                                                                                                                                                                                                                                                                                                                                                                                                                                                                                                                                                                                         |   |            |             |            |   |            |            |            |   |            |             |            |   |            |            |            |   |            |            |            |   |            |            |             |   |            |            |             |   |            |             |             |   |            |            |             |   |            |             |            |   |            |             |            |   |            |             |             |   |            |             |             |   |            |             |            |   |            |             |            |   |            |             |             |   |             |            |            |   |             |            |            |   |             |            |             |   |             |            |             |   |            |            |            |   |             |             |            |   |             |            |            |   |             |             |             |   |             |             |            |   |             |            |            |   |             |             |             |   |             |             |             |   |             |             |             |   |             |            |            |   |             |             |             |   |             |             |             |
| H                 | 1.72154200                                                                                                                                                                                                                                                                                                                                                                                                                                                                                                                                                                                                                                                                                                                                                                                                                                                                                                                                                                                                                                                                                                                                                                                                                                                                                                                                                                                                                                                                                                                                                                                                                                                                                                                                                                                                                                                                                                                                                                                                                                                                                                                                                                                                                                                                                                                                                                                                                   | -2.56963600                                                                         | 0.59632500                                                                            |             |             |   |             |             |             |   |             |             |             |   |             |             |             |   |             |             |             |   |             |            |             |   |             |             |             |   |             |             |             |   |             |             |             |   |             |             |             |   |             |             |             |   |             |             |            |   |             |             |             |   |             |             |             |   |             |             |             |   |             |             |             |   |             |             |             |   |             |             |             |                                                                                                                                                                                                                                                                                                                                                                                                                                                                                                                                                                                                                                                                                                                                                                                                                                                                                                                                                                                                                                                                                                                                                                                                                                                                                                                                                                                                                                                                                                                                                                                                                                                                                                                                                                           |            |             |             |            |            |             |             |            |            |            |            |             |            |             |             |             |            |             |             |             |            |             |             |            |            |             |             |            |            |             |            |            |            |             |             |            |            |            |            |            |            |            |            |                                                                                                                                                                                                                                                                                                                                                                                                                                                                                                                                                                                                                                                                                                                                                                                                                                                                                                                                                                                                                                                                                                                                                                                                                                                                                                                                                                                                                                                                                                                                                                                                                                                                                                                                                                                                                                                                                                                                                                                                                                                                                                                                                                                                                                                                                                                                                                                                                                                                                                                                                                                                                                                                            |   |            |             |             |   |            |             |             |   |            |             |            |   |            |             |            |   |            |             |            |   |            |             |             |   |             |             |             |   |             |             |             |   |             |             |             |   |             |             |             |                                                                                                                                                                                                                                                                                                                                                                                                                                                                                                                                                                                                                                                                                                                                                                                                                                                                                                                                                                                                                                                                                                                                                                                                                                                                                                                                                                                                                                                                                                                                                                                                                                                                                                                                                                            |            |             |             |            |            |             |             |            |            |             |             |             |            |            |            |             |            |             |             |             |            |             |             |            |             |             |             |            |             |             |             |            |             |            |            |            |             |            |            |            |            |            |             |             |             |             |             |             |             |             |             |             |             |             |             |            |             |             |             |            |             |             |             |            |             |             |             |            |             |             |             |             |             |             |             |             |             |             |            |             |             |             |             |             |             |             |             |                                                                                                                                                                                                                                                                                                                                                                                                                                                                                                                                                                                                                                                                                                                                                                                                                                                                                                                                                                                                                                                                                                                                                                                                                                                                                                                                                                                                                                                                                                                                                                                                                                                                                                                                                                                                                                                                                                                                                                                                                                                                                                                                                                                                                                                                                                                                                                                                                                                                                                                                                                                                                                                                         |   |            |             |            |   |            |            |            |   |            |             |            |   |            |            |            |   |            |            |            |   |            |            |             |   |            |            |             |   |            |             |             |   |            |            |             |   |            |             |            |   |            |             |            |   |            |             |             |   |            |             |             |   |            |             |            |   |            |             |            |   |            |             |             |   |             |            |            |   |             |            |            |   |             |            |             |   |             |            |             |   |            |            |            |   |             |             |            |   |             |            |            |   |             |             |             |   |             |             |            |   |             |            |            |   |             |             |             |   |             |             |             |   |             |             |             |   |             |            |            |   |             |             |             |   |             |             |             |
| H                 | 3.33020800                                                                                                                                                                                                                                                                                                                                                                                                                                                                                                                                                                                                                                                                                                                                                                                                                                                                                                                                                                                                                                                                                                                                                                                                                                                                                                                                                                                                                                                                                                                                                                                                                                                                                                                                                                                                                                                                                                                                                                                                                                                                                                                                                                                                                                                                                                                                                                                                                   | -1.80842300                                                                         | 0.63638300                                                                            |             |             |   |             |             |             |   |             |             |             |   |             |             |             |   |             |             |             |   |             |            |             |   |             |             |             |   |             |             |             |   |             |             |             |   |             |             |             |   |             |             |             |   |             |             |            |   |             |             |             |   |             |             |             |   |             |             |             |   |             |             |             |   |             |             |             |   |             |             |             |                                                                                                                                                                                                                                                                                                                                                                                                                                                                                                                                                                                                                                                                                                                                                                                                                                                                                                                                                                                                                                                                                                                                                                                                                                                                                                                                                                                                                                                                                                                                                                                                                                                                                                                                                                           |            |             |             |            |            |             |             |            |            |            |            |             |            |             |             |             |            |             |             |             |            |             |             |            |            |             |             |            |            |             |            |            |            |             |             |            |            |            |            |            |            |            |            |                                                                                                                                                                                                                                                                                                                                                                                                                                                                                                                                                                                                                                                                                                                                                                                                                                                                                                                                                                                                                                                                                                                                                                                                                                                                                                                                                                                                                                                                                                                                                                                                                                                                                                                                                                                                                                                                                                                                                                                                                                                                                                                                                                                                                                                                                                                                                                                                                                                                                                                                                                                                                                                                            |   |            |             |             |   |            |             |             |   |            |             |            |   |            |             |            |   |            |             |            |   |            |             |             |   |             |             |             |   |             |             |             |   |             |             |             |   |             |             |             |                                                                                                                                                                                                                                                                                                                                                                                                                                                                                                                                                                                                                                                                                                                                                                                                                                                                                                                                                                                                                                                                                                                                                                                                                                                                                                                                                                                                                                                                                                                                                                                                                                                                                                                                                                            |            |             |             |            |            |             |             |            |            |             |             |             |            |            |            |             |            |             |             |             |            |             |             |            |             |             |             |            |             |             |             |            |             |            |            |            |             |            |            |            |            |            |             |             |             |             |             |             |             |             |             |             |             |             |             |            |             |             |             |            |             |             |             |            |             |             |             |            |             |             |             |             |             |             |             |             |             |             |            |             |             |             |             |             |             |             |             |                                                                                                                                                                                                                                                                                                                                                                                                                                                                                                                                                                                                                                                                                                                                                                                                                                                                                                                                                                                                                                                                                                                                                                                                                                                                                                                                                                                                                                                                                                                                                                                                                                                                                                                                                                                                                                                                                                                                                                                                                                                                                                                                                                                                                                                                                                                                                                                                                                                                                                                                                                                                                                                                         |   |            |             |            |   |            |            |            |   |            |             |            |   |            |            |            |   |            |            |            |   |            |            |             |   |            |            |             |   |            |             |             |   |            |            |             |   |            |             |            |   |            |             |            |   |            |             |             |   |            |             |             |   |            |             |            |   |            |             |            |   |            |             |             |   |             |            |            |   |             |            |            |   |             |            |             |   |             |            |             |   |            |            |            |   |             |             |            |   |             |            |            |   |             |             |             |   |             |             |            |   |             |            |            |   |             |             |             |   |             |             |             |   |             |             |             |   |             |            |            |   |             |             |             |   |             |             |             |
| H                 | 1.95808900                                                                                                                                                                                                                                                                                                                                                                                                                                                                                                                                                                                                                                                                                                                                                                                                                                                                                                                                                                                                                                                                                                                                                                                                                                                                                                                                                                                                                                                                                                                                                                                                                                                                                                                                                                                                                                                                                                                                                                                                                                                                                                                                                                                                                                                                                                                                                                                                                   | -1.13707600                                                                         | 1.57073600                                                                            |             |             |   |             |             |             |   |             |             |             |   |             |             |             |   |             |             |             |   |             |            |             |   |             |             |             |   |             |             |             |   |             |             |             |   |             |             |             |   |             |             |             |   |             |             |            |   |             |             |             |   |             |             |             |   |             |             |             |   |             |             |             |   |             |             |             |   |             |             |             |                                                                                                                                                                                                                                                                                                                                                                                                                                                                                                                                                                                                                                                                                                                                                                                                                                                                                                                                                                                                                                                                                                                                                                                                                                                                                                                                                                                                                                                                                                                                                                                                                                                                                                                                                                           |            |             |             |            |            |             |             |            |            |            |            |             |            |             |             |             |            |             |             |             |            |             |             |            |            |             |             |            |            |             |            |            |            |             |             |            |            |            |            |            |            |            |            |                                                                                                                                                                                                                                                                                                                                                                                                                                                                                                                                                                                                                                                                                                                                                                                                                                                                                                                                                                                                                                                                                                                                                                                                                                                                                                                                                                                                                                                                                                                                                                                                                                                                                                                                                                                                                                                                                                                                                                                                                                                                                                                                                                                                                                                                                                                                                                                                                                                                                                                                                                                                                                                                            |   |            |             |             |   |            |             |             |   |            |             |            |   |            |             |            |   |            |             |            |   |            |             |             |   |             |             |             |   |             |             |             |   |             |             |             |   |             |             |             |                                                                                                                                                                                                                                                                                                                                                                                                                                                                                                                                                                                                                                                                                                                                                                                                                                                                                                                                                                                                                                                                                                                                                                                                                                                                                                                                                                                                                                                                                                                                                                                                                                                                                                                                                                            |            |             |             |            |            |             |             |            |            |             |             |             |            |            |            |             |            |             |             |             |            |             |             |            |             |             |             |            |             |             |             |            |             |            |            |            |             |            |            |            |            |            |             |             |             |             |             |             |             |             |             |             |             |             |             |            |             |             |             |            |             |             |             |            |             |             |             |            |             |             |             |             |             |             |             |             |             |             |            |             |             |             |             |             |             |             |             |                                                                                                                                                                                                                                                                                                                                                                                                                                                                                                                                                                                                                                                                                                                                                                                                                                                                                                                                                                                                                                                                                                                                                                                                                                                                                                                                                                                                                                                                                                                                                                                                                                                                                                                                                                                                                                                                                                                                                                                                                                                                                                                                                                                                                                                                                                                                                                                                                                                                                                                                                                                                                                                                         |   |            |             |            |   |            |            |            |   |            |             |            |   |            |            |            |   |            |            |            |   |            |            |             |   |            |            |             |   |            |             |             |   |            |            |             |   |            |             |            |   |            |             |            |   |            |             |             |   |            |             |             |   |            |             |            |   |            |             |            |   |            |             |             |   |             |            |            |   |             |            |            |   |             |            |             |   |             |            |             |   |            |            |            |   |             |             |            |   |             |            |            |   |             |             |             |   |             |             |            |   |             |            |            |   |             |             |             |   |             |             |             |   |             |             |             |   |             |            |            |   |             |             |             |   |             |             |             |
| C                 | -4.03182900                                                                                                                                                                                                                                                                                                                                                                                                                                                                                                                                                                                                                                                                                                                                                                                                                                                                                                                                                                                                                                                                                                                                                                                                                                                                                                                                                                                                                                                                                                                                                                                                                                                                                                                                                                                                                                                                                                                                                                                                                                                                                                                                                                                                                                                                                                                                                                                                                  | 0.30475100                                                                          | -0.57223400                                                                           |             |             |   |             |             |             |   |             |             |             |   |             |             |             |   |             |             |             |   |             |            |             |   |             |             |             |   |             |             |             |   |             |             |             |   |             |             |             |   |             |             |             |   |             |             |            |   |             |             |             |   |             |             |             |   |             |             |             |   |             |             |             |   |             |             |             |   |             |             |             |                                                                                                                                                                                                                                                                                                                                                                                                                                                                                                                                                                                                                                                                                                                                                                                                                                                                                                                                                                                                                                                                                                                                                                                                                                                                                                                                                                                                                                                                                                                                                                                                                                                                                                                                                                           |            |             |             |            |            |             |             |            |            |            |            |             |            |             |             |             |            |             |             |             |            |             |             |            |            |             |             |            |            |             |            |            |            |             |             |            |            |            |            |            |            |            |            |                                                                                                                                                                                                                                                                                                                                                                                                                                                                                                                                                                                                                                                                                                                                                                                                                                                                                                                                                                                                                                                                                                                                                                                                                                                                                                                                                                                                                                                                                                                                                                                                                                                                                                                                                                                                                                                                                                                                                                                                                                                                                                                                                                                                                                                                                                                                                                                                                                                                                                                                                                                                                                                                            |   |            |             |             |   |            |             |             |   |            |             |            |   |            |             |            |   |            |             |            |   |            |             |             |   |             |             |             |   |             |             |             |   |             |             |             |   |             |             |             |                                                                                                                                                                                                                                                                                                                                                                                                                                                                                                                                                                                                                                                                                                                                                                                                                                                                                                                                                                                                                                                                                                                                                                                                                                                                                                                                                                                                                                                                                                                                                                                                                                                                                                                                                                            |            |             |             |            |            |             |             |            |            |             |             |             |            |            |            |             |            |             |             |             |            |             |             |            |             |             |             |            |             |             |             |            |             |            |            |            |             |            |            |            |            |            |             |             |             |             |             |             |             |             |             |             |             |             |             |            |             |             |             |            |             |             |             |            |             |             |             |            |             |             |             |             |             |             |             |             |             |             |            |             |             |             |             |             |             |             |             |                                                                                                                                                                                                                                                                                                                                                                                                                                                                                                                                                                                                                                                                                                                                                                                                                                                                                                                                                                                                                                                                                                                                                                                                                                                                                                                                                                                                                                                                                                                                                                                                                                                                                                                                                                                                                                                                                                                                                                                                                                                                                                                                                                                                                                                                                                                                                                                                                                                                                                                                                                                                                                                                         |   |            |             |            |   |            |            |            |   |            |             |            |   |            |            |            |   |            |            |            |   |            |            |             |   |            |            |             |   |            |             |             |   |            |            |             |   |            |             |            |   |            |             |            |   |            |             |             |   |            |             |             |   |            |             |            |   |            |             |            |   |            |             |             |   |             |            |            |   |             |            |            |   |             |            |             |   |             |            |             |   |            |            |            |   |             |             |            |   |             |            |            |   |             |             |             |   |             |             |            |   |             |            |            |   |             |             |             |   |             |             |             |   |             |             |             |   |             |            |            |   |             |             |             |   |             |             |             |
| H                 | -4.06828600                                                                                                                                                                                                                                                                                                                                                                                                                                                                                                                                                                                                                                                                                                                                                                                                                                                                                                                                                                                                                                                                                                                                                                                                                                                                                                                                                                                                                                                                                                                                                                                                                                                                                                                                                                                                                                                                                                                                                                                                                                                                                                                                                                                                                                                                                                                                                                                                                  | -0.01066100                                                                         | -1.61592500                                                                           |             |             |   |             |             |             |   |             |             |             |   |             |             |             |   |             |             |             |   |             |            |             |   |             |             |             |   |             |             |             |   |             |             |             |   |             |             |             |   |             |             |             |   |             |             |            |   |             |             |             |   |             |             |             |   |             |             |             |   |             |             |             |   |             |             |             |   |             |             |             |                                                                                                                                                                                                                                                                                                                                                                                                                                                                                                                                                                                                                                                                                                                                                                                                                                                                                                                                                                                                                                                                                                                                                                                                                                                                                                                                                                                                                                                                                                                                                                                                                                                                                                                                                                           |            |             |             |            |            |             |             |            |            |            |            |             |            |             |             |             |            |             |             |             |            |             |             |            |            |             |             |            |            |             |            |            |            |             |             |            |            |            |            |            |            |            |            |                                                                                                                                                                                                                                                                                                                                                                                                                                                                                                                                                                                                                                                                                                                                                                                                                                                                                                                                                                                                                                                                                                                                                                                                                                                                                                                                                                                                                                                                                                                                                                                                                                                                                                                                                                                                                                                                                                                                                                                                                                                                                                                                                                                                                                                                                                                                                                                                                                                                                                                                                                                                                                                                            |   |            |             |             |   |            |             |             |   |            |             |            |   |            |             |            |   |            |             |            |   |            |             |             |   |             |             |             |   |             |             |             |   |             |             |             |   |             |             |             |                                                                                                                                                                                                                                                                                                                                                                                                                                                                                                                                                                                                                                                                                                                                                                                                                                                                                                                                                                                                                                                                                                                                                                                                                                                                                                                                                                                                                                                                                                                                                                                                                                                                                                                                                                            |            |             |             |            |            |             |             |            |            |             |             |             |            |            |            |             |            |             |             |             |            |             |             |            |             |             |             |            |             |             |             |            |             |            |            |            |             |            |            |            |            |            |             |             |             |             |             |             |             |             |             |             |             |             |             |            |             |             |             |            |             |             |             |            |             |             |             |            |             |             |             |             |             |             |             |             |             |             |            |             |             |             |             |             |             |             |             |                                                                                                                                                                                                                                                                                                                                                                                                                                                                                                                                                                                                                                                                                                                                                                                                                                                                                                                                                                                                                                                                                                                                                                                                                                                                                                                                                                                                                                                                                                                                                                                                                                                                                                                                                                                                                                                                                                                                                                                                                                                                                                                                                                                                                                                                                                                                                                                                                                                                                                                                                                                                                                                                         |   |            |             |            |   |            |            |            |   |            |             |            |   |            |            |            |   |            |            |            |   |            |            |             |   |            |            |             |   |            |             |             |   |            |            |             |   |            |             |            |   |            |             |            |   |            |             |             |   |            |             |             |   |            |             |            |   |            |             |            |   |            |             |             |   |             |            |            |   |             |            |            |   |             |            |             |   |             |            |             |   |            |            |            |   |             |             |            |   |             |            |            |   |             |             |             |   |             |             |            |   |             |            |            |   |             |             |             |   |             |             |             |   |             |             |             |   |             |            |            |   |             |             |             |   |             |             |             |
| H                 | -4.99192200                                                                                                                                                                                                                                                                                                                                                                                                                                                                                                                                                                                                                                                                                                                                                                                                                                                                                                                                                                                                                                                                                                                                                                                                                                                                                                                                                                                                                                                                                                                                                                                                                                                                                                                                                                                                                                                                                                                                                                                                                                                                                                                                                                                                                                                                                                                                                                                                                  | 0.07185100                                                                          | -0.10972500                                                                           |             |             |   |             |             |             |   |             |             |             |   |             |             |             |   |             |             |             |   |             |            |             |   |             |             |             |   |             |             |             |   |             |             |             |   |             |             |             |   |             |             |             |   |             |             |            |   |             |             |             |   |             |             |             |   |             |             |             |   |             |             |             |   |             |             |             |   |             |             |             |                                                                                                                                                                                                                                                                                                                                                                                                                                                                                                                                                                                                                                                                                                                                                                                                                                                                                                                                                                                                                                                                                                                                                                                                                                                                                                                                                                                                                                                                                                                                                                                                                                                                                                                                                                           |            |             |             |            |            |             |             |            |            |            |            |             |            |             |             |             |            |             |             |             |            |             |             |            |            |             |             |            |            |             |            |            |            |             |             |            |            |            |            |            |            |            |            |                                                                                                                                                                                                                                                                                                                                                                                                                                                                                                                                                                                                                                                                                                                                                                                                                                                                                                                                                                                                                                                                                                                                                                                                                                                                                                                                                                                                                                                                                                                                                                                                                                                                                                                                                                                                                                                                                                                                                                                                                                                                                                                                                                                                                                                                                                                                                                                                                                                                                                                                                                                                                                                                            |   |            |             |             |   |            |             |             |   |            |             |            |   |            |             |            |   |            |             |            |   |            |             |             |   |             |             |             |   |             |             |             |   |             |             |             |   |             |             |             |                                                                                                                                                                                                                                                                                                                                                                                                                                                                                                                                                                                                                                                                                                                                                                                                                                                                                                                                                                                                                                                                                                                                                                                                                                                                                                                                                                                                                                                                                                                                                                                                                                                                                                                                                                            |            |             |             |            |            |             |             |            |            |             |             |             |            |            |            |             |            |             |             |             |            |             |             |            |             |             |             |            |             |             |             |            |             |            |            |            |             |            |            |            |            |            |             |             |             |             |             |             |             |             |             |             |             |             |             |            |             |             |             |            |             |             |             |            |             |             |             |            |             |             |             |             |             |             |             |             |             |             |            |             |             |             |             |             |             |             |             |                                                                                                                                                                                                                                                                                                                                                                                                                                                                                                                                                                                                                                                                                                                                                                                                                                                                                                                                                                                                                                                                                                                                                                                                                                                                                                                                                                                                                                                                                                                                                                                                                                                                                                                                                                                                                                                                                                                                                                                                                                                                                                                                                                                                                                                                                                                                                                                                                                                                                                                                                                                                                                                                         |   |            |             |            |   |            |            |            |   |            |             |            |   |            |            |            |   |            |            |            |   |            |            |             |   |            |            |             |   |            |             |             |   |            |            |             |   |            |             |            |   |            |             |            |   |            |             |             |   |            |             |             |   |            |             |            |   |            |             |            |   |            |             |             |   |             |            |            |   |             |            |            |   |             |            |             |   |             |            |             |   |            |            |            |   |             |             |            |   |             |            |            |   |             |             |             |   |             |             |            |   |             |            |            |   |             |             |             |   |             |             |             |   |             |             |             |   |             |            |            |   |             |             |             |   |             |             |             |
| H                 | -3.88886600                                                                                                                                                                                                                                                                                                                                                                                                                                                                                                                                                                                                                                                                                                                                                                                                                                                                                                                                                                                                                                                                                                                                                                                                                                                                                                                                                                                                                                                                                                                                                                                                                                                                                                                                                                                                                                                                                                                                                                                                                                                                                                                                                                                                                                                                                                                                                                                                                  | 1.38573300                                                                          | -0.54039800                                                                           |             |             |   |             |             |             |   |             |             |             |   |             |             |             |   |             |             |             |   |             |            |             |   |             |             |             |   |             |             |             |   |             |             |             |   |             |             |             |   |             |             |             |   |             |             |            |   |             |             |             |   |             |             |             |   |             |             |             |   |             |             |             |   |             |             |             |   |             |             |             |                                                                                                                                                                                                                                                                                                                                                                                                                                                                                                                                                                                                                                                                                                                                                                                                                                                                                                                                                                                                                                                                                                                                                                                                                                                                                                                                                                                                                                                                                                                                                                                                                                                                                                                                                                           |            |             |             |            |            |             |             |            |            |            |            |             |            |             |             |             |            |             |             |             |            |             |             |            |            |             |             |            |            |             |            |            |            |             |             |            |            |            |            |            |            |            |            |                                                                                                                                                                                                                                                                                                                                                                                                                                                                                                                                                                                                                                                                                                                                                                                                                                                                                                                                                                                                                                                                                                                                                                                                                                                                                                                                                                                                                                                                                                                                                                                                                                                                                                                                                                                                                                                                                                                                                                                                                                                                                                                                                                                                                                                                                                                                                                                                                                                                                                                                                                                                                                                                            |   |            |             |             |   |            |             |             |   |            |             |            |   |            |             |            |   |            |             |            |   |            |             |             |   |             |             |             |   |             |             |             |   |             |             |             |   |             |             |             |                                                                                                                                                                                                                                                                                                                                                                                                                                                                                                                                                                                                                                                                                                                                                                                                                                                                                                                                                                                                                                                                                                                                                                                                                                                                                                                                                                                                                                                                                                                                                                                                                                                                                                                                                                            |            |             |             |            |            |             |             |            |            |             |             |             |            |            |            |             |            |             |             |             |            |             |             |            |             |             |             |            |             |             |             |            |             |            |            |            |             |            |            |            |            |            |             |             |             |             |             |             |             |             |             |             |             |             |             |            |             |             |             |            |             |             |             |            |             |             |             |            |             |             |             |             |             |             |             |             |             |             |            |             |             |             |             |             |             |             |             |                                                                                                                                                                                                                                                                                                                                                                                                                                                                                                                                                                                                                                                                                                                                                                                                                                                                                                                                                                                                                                                                                                                                                                                                                                                                                                                                                                                                                                                                                                                                                                                                                                                                                                                                                                                                                                                                                                                                                                                                                                                                                                                                                                                                                                                                                                                                                                                                                                                                                                                                                                                                                                                                         |   |            |             |            |   |            |            |            |   |            |             |            |   |            |            |            |   |            |            |            |   |            |            |             |   |            |            |             |   |            |             |             |   |            |            |             |   |            |             |            |   |            |             |            |   |            |             |             |   |            |             |             |   |            |             |            |   |            |             |            |   |            |             |             |   |             |            |            |   |             |            |            |   |             |            |             |   |             |            |             |   |            |            |            |   |             |             |            |   |             |            |            |   |             |             |             |   |             |             |            |   |             |            |            |   |             |             |             |   |             |             |             |   |             |             |             |   |             |            |            |   |             |             |             |   |             |             |             |
| 23 C <sub>2</sub> |                                                                                                                                                                                                                                                                                                                                                                                                                                                                                                                                                                                                                                                                                                                                                                                                                                                                                                                                                                                                                                                                                                                                                                                                                                                                                                                                                                                                                                                                                                                                                                                                                                                                                                                                                                                                                                                                                                                                                                                                                                                                                                                                                                                                                                                                                                                                           |                                                                                     |                                                                                       |             |             |   |             |             |             |   |             |             |             |   |             |             |             |   |             |             |             |   |             |            |             |   |             |             |             |   |             |             |             |   |             |             |             |   |             |             |             |   |             |             |             |   |             |             |            |   |             |             |             |   |             |             |             |   |             |             |             |   |             |             |             |   |             |             |             |   |             |             |             |                                                                                                                                                                                                                                                                                                                                                                                                                                                                                                                                                                                                                                                                                                                                                                                                                                                                                                                                                                                                                                                                                                                                                                                                                                                                                                                                                                                                                                                                                                                                                                                                                                                                                                                                                                           |            |             |             |            |            |             |             |            |            |            |            |             |            |             |             |             |            |             |             |             |            |             |             |            |            |             |             |            |            |             |            |            |            |             |             |            |            |            |            |            |            |            |            |                                                                                                                                                                                                                                                                                                                                                                                                                                                                                                                                                                                                                                                                                                                                                                                                                                                                                                                                                                                                                                                                                                                                                                                                                                                                                                                                                                                                                                                                                                                                                                                                                                                                                                                                                                                                                                                                                                                                                                                                                                                                                                                                                                                                                                                                                                                                                                                                                                                                                                                                                                                                                                                                            |   |            |             |             |   |            |             |             |   |            |             |            |   |            |             |            |   |            |             |            |   |            |             |             |   |             |             |             |   |             |             |             |   |             |             |             |   |             |             |             |                                                                                                                                                                                                                                                                                                                                                                                                                                                                                                                                                                                                                                                                                                                                                                                                                                                                                                                                                                                                                                                                                                                                                                                                                                                                                                                                                                                                                                                                                                                                                                                                                                                                                                                                                                            |            |             |             |            |            |             |             |            |            |             |             |             |            |            |            |             |            |             |             |             |            |             |             |            |             |             |             |            |             |             |             |            |             |            |            |            |             |            |            |            |            |            |             |             |             |             |             |             |             |             |             |             |             |             |             |            |             |             |             |            |             |             |             |            |             |             |             |            |             |             |             |             |             |             |             |             |             |             |            |             |             |             |             |             |             |             |             |                                                                                                                                                                                                                                                                                                                                                                                                                                                                                                                                                                                                                                                                                                                                                                                                                                                                                                                                                                                                                                                                                                                                                                                                                                                                                                                                                                                                                                                                                                                                                                                                                                                                                                                                                                                                                                                                                                                                                                                                                                                                                                                                                                                                                                                                                                                                                                                                                                                                                                                                                                                                                                                                         |   |            |             |            |   |            |            |            |   |            |             |            |   |            |            |            |   |            |            |            |   |            |            |             |   |            |            |             |   |            |             |             |   |            |            |             |   |            |             |            |   |            |             |            |   |            |             |             |   |            |             |             |   |            |             |            |   |            |             |            |   |            |             |             |   |             |            |            |   |             |            |            |   |             |            |             |   |             |            |             |   |            |            |            |   |             |             |            |   |             |            |            |   |             |             |             |   |             |             |            |   |             |            |            |   |             |             |             |   |             |             |             |   |             |             |             |   |             |            |            |   |             |             |             |   |             |             |             |
|                   | <p>-11</p> <table border="1"> <tbody> <tr><td>C</td><td>-0.16473200</td><td>1.07302800</td><td>-0.00002200</td></tr> <tr><td>O</td><td>-0.74452200</td><td>2.16232200</td><td>-0.00007800</td></tr> <tr><td>O</td><td>-0.90187100</td><td>-0.07522800</td><td>0.00003900</td></tr> <tr><td>C</td><td>-2.31663600</td><td>0.06241100</td><td>-0.00015000</td></tr> <tr><td>H</td><td>-2.63419000</td><td>0.62504000</td><td>0.88094000</td></tr> <tr><td>H</td><td>-2.63392700</td><td>0.62536100</td><td>-0.88112400</td></tr> <tr><td>C</td><td>2.03538400</td><td>-0.26006400</td><td>0.00024500</td></tr> <tr><td>O</td><td>3.28747600</td><td>-0.20132200</td><td>0.00009100</td></tr> <tr><td>C</td><td>1.41259400</td><td>-1.64876400</td><td>0.00035800</td></tr> <tr><td>H</td><td>0.77786600</td><td>-1.79796600</td><td>-0.87360000</td></tr> <tr><td>H</td><td>2.21276600</td><td>-2.38772000</td><td>0.00049300</td></tr> <tr><td>H</td><td>0.77773300</td><td>-1.79778500</td><td>0.87424600</td></tr> <tr><td>C</td><td>-2.91252000</td><td>-1.32653500</td><td>-0.00048300</td></tr> <tr><td>H</td><td>-2.60197600</td><td>-1.88349900</td><td>0.88489900</td></tr> <tr><td>H</td><td>-4.00166600</td><td>-1.26133100</td><td>-0.00059600</td></tr> <tr><td>H</td><td>-2.60176900</td><td>-1.88315700</td><td>-0.88600800</td></tr> </tbody> </table>                                                                                                                                                                                                                                                                                                                                                                                                                                                                                                                                                                                                                                                                                                                                                                                                                                                                                                                                                                                                                                                         | C                                                                                   | -0.16473200                                                                           | 1.07302800  | -0.00002200 | O | -0.74452200 | 2.16232200  | -0.00007800 | O | -0.90187100 | -0.07522800 | 0.00003900  | C | -2.31663600 | 0.06241100  | -0.00015000 | H | -2.63419000 | 0.62504000  | 0.88094000  | H | -2.63392700 | 0.62536100 | -0.88112400 | C | 2.03538400  | -0.26006400 | 0.00024500  | O | 3.28747600  | -0.20132200 | 0.00009100  | C | 1.41259400  | -1.64876400 | 0.00035800  | H | 0.77786600  | -1.79796600 | -0.87360000 | H | 2.21276600  | -2.38772000 | 0.00049300  | H | 0.77773300  | -1.79778500 | 0.87424600 | C | -2.91252000 | -1.32653500 | -0.00048300 | H | -2.60197600 | -1.88349900 | 0.88489900  | H | -4.00166600 | -1.26133100 | -0.00059600 | H | -2.60176900 | -1.88315700 | -0.88600800 |   |             |             |             |   |             |             |             |                                                                                                                                                                                                                                                                                                                                                                                                                                                                                                                                                                                                                                                                                                                                                                                                                                                                                                                                                                                                                                                                                                                                                                                                                                                                                                                                                                                                                                                                                                                                                                                                                                                                                                                                                                           |            |             |             |            |            |             |             |            |            |            |            |             |            |             |             |             |            |             |             |             |            |             |             |            |            |             |             |            |            |             |            |            |            |             |             |            |            |            |            |            |            |            |            |                                                                                                                                                                                                                                                                                                                                                                                                                                                                                                                                                                                                                                                                                                                                                                                                                                                                                                                                                                                                                                                                                                                                                                                                                                                                                                                                                                                                                                                                                                                                                                                                                                                                                                                                                                                                                                                                                                                                                                                                                                                                                                                                                                                                                                                                                                                                                                                                                                                                                                                                                                                                                                                                            |   |            |             |             |   |            |             |             |   |            |             |            |   |            |             |            |   |            |             |            |   |            |             |             |   |             |             |             |   |             |             |             |   |             |             |             |   |             |             |             |                                                                                                                                                                                                                                                                                                                                                                                                                                                                                                                                                                                                                                                                                                                                                                                                                                                                                                                                                                                                                                                                                                                                                                                                                                                                                                                                                                                                                                                                                                                                                                                                                                                                                                                                                                            |            |             |             |            |            |             |             |            |            |             |             |             |            |            |            |             |            |             |             |             |            |             |             |            |             |             |             |            |             |             |             |            |             |            |            |            |             |            |            |            |            |            |             |             |             |             |             |             |             |             |             |             |             |             |             |            |             |             |             |            |             |             |             |            |             |             |             |            |             |             |             |             |             |             |             |             |             |             |            |             |             |             |             |             |             |             |             |                                                                                                                                                                                                                                                                                                                                                                                                                                                                                                                                                                                                                                                                                                                                                                                                                                                                                                                                                                                                                                                                                                                                                                                                                                                                                                                                                                                                                                                                                                                                                                                                                                                                                                                                                                                                                                                                                                                                                                                                                                                                                                                                                                                                                                                                                                                                                                                                                                                                                                                                                                                                                                                                         |   |            |             |            |   |            |            |            |   |            |             |            |   |            |            |            |   |            |            |            |   |            |            |             |   |            |            |             |   |            |             |             |   |            |            |             |   |            |             |            |   |            |             |            |   |            |             |             |   |            |             |             |   |            |             |            |   |            |             |            |   |            |             |             |   |             |            |            |   |             |            |            |   |             |            |             |   |             |            |             |   |            |            |            |   |             |             |            |   |             |            |            |   |             |             |             |   |             |             |            |   |             |            |            |   |             |             |             |   |             |             |             |   |             |             |             |   |             |            |            |   |             |             |             |   |             |             |             |
| C                 | -0.16473200                                                                                                                                                                                                                                                                                                                                                                                                                                                                                                                                                                                                                                                                                                                                                                                                                                                                                                                                                                                                                                                                                                                                                                                                                                                                                                                                                                                                                                                                                                                                                                                                                                                                                                                                                                                                                                                                                                                                                                                                                                                                                                                                                                                                                                                                                                                                                                                                                  | 1.07302800                                                                          | -0.00002200                                                                           |             |             |   |             |             |             |   |             |             |             |   |             |             |             |   |             |             |             |   |             |            |             |   |             |             |             |   |             |             |             |   |             |             |             |   |             |             |             |   |             |             |             |   |             |             |            |   |             |             |             |   |             |             |             |   |             |             |             |   |             |             |             |   |             |             |             |   |             |             |             |                                                                                                                                                                                                                                                                                                                                                                                                                                                                                                                                                                                                                                                                                                                                                                                                                                                                                                                                                                                                                                                                                                                                                                                                                                                                                                                                                                                                                                                                                                                                                                                                                                                                                                                                                                           |            |             |             |            |            |             |             |            |            |            |            |             |            |             |             |             |            |             |             |             |            |             |             |            |            |             |             |            |            |             |            |            |            |             |             |            |            |            |            |            |            |            |            |                                                                                                                                                                                                                                                                                                                                                                                                                                                                                                                                                                                                                                                                                                                                                                                                                                                                                                                                                                                                                                                                                                                                                                                                                                                                                                                                                                                                                                                                                                                                                                                                                                                                                                                                                                                                                                                                                                                                                                                                                                                                                                                                                                                                                                                                                                                                                                                                                                                                                                                                                                                                                                                                            |   |            |             |             |   |            |             |             |   |            |             |            |   |            |             |            |   |            |             |            |   |            |             |             |   |             |             |             |   |             |             |             |   |             |             |             |   |             |             |             |                                                                                                                                                                                                                                                                                                                                                                                                                                                                                                                                                                                                                                                                                                                                                                                                                                                                                                                                                                                                                                                                                                                                                                                                                                                                                                                                                                                                                                                                                                                                                                                                                                                                                                                                                                            |            |             |             |            |            |             |             |            |            |             |             |             |            |            |            |             |            |             |             |             |            |             |             |            |             |             |             |            |             |             |             |            |             |            |            |            |             |            |            |            |            |            |             |             |             |             |             |             |             |             |             |             |             |             |             |            |             |             |             |            |             |             |             |            |             |             |             |            |             |             |             |             |             |             |             |             |             |             |            |             |             |             |             |             |             |             |             |                                                                                                                                                                                                                                                                                                                                                                                                                                                                                                                                                                                                                                                                                                                                                                                                                                                                                                                                                                                                                                                                                                                                                                                                                                                                                                                                                                                                                                                                                                                                                                                                                                                                                                                                                                                                                                                                                                                                                                                                                                                                                                                                                                                                                                                                                                                                                                                                                                                                                                                                                                                                                                                                         |   |            |             |            |   |            |            |            |   |            |             |            |   |            |            |            |   |            |            |            |   |            |            |             |   |            |            |             |   |            |             |             |   |            |            |             |   |            |             |            |   |            |             |            |   |            |             |             |   |            |             |             |   |            |             |            |   |            |             |            |   |            |             |             |   |             |            |            |   |             |            |            |   |             |            |             |   |             |            |             |   |            |            |            |   |             |             |            |   |             |            |            |   |             |             |             |   |             |             |            |   |             |            |            |   |             |             |             |   |             |             |             |   |             |             |             |   |             |            |            |   |             |             |             |   |             |             |             |
| O                 | -0.74452200                                                                                                                                                                                                                                                                                                                                                                                                                                                                                                                                                                                                                                                                                                                                                                                                                                                                                                                                                                                                                                                                                                                                                                                                                                                                                                                                                                                                                                                                                                                                                                                                                                                                                                                                                                                                                                                                                                                                                                                                                                                                                                                                                                                                                                                                                                                                                                                                                  | 2.16232200                                                                          | -0.00007800                                                                           |             |             |   |             |             |             |   |             |             |             |   |             |             |             |   |             |             |             |   |             |            |             |   |             |             |             |   |             |             |             |   |             |             |             |   |             |             |             |   |             |             |             |   |             |             |            |   |             |             |             |   |             |             |             |   |             |             |             |   |             |             |             |   |             |             |             |   |             |             |             |                                                                                                                                                                                                                                                                                                                                                                                                                                                                                                                                                                                                                                                                                                                                                                                                                                                                                                                                                                                                                                                                                                                                                                                                                                                                                                                                                                                                                                                                                                                                                                                                                                                                                                                                                                           |            |             |             |            |            |             |             |            |            |            |            |             |            |             |             |             |            |             |             |             |            |             |             |            |            |             |             |            |            |             |            |            |            |             |             |            |            |            |            |            |            |            |            |                                                                                                                                                                                                                                                                                                                                                                                                                                                                                                                                                                                                                                                                                                                                                                                                                                                                                                                                                                                                                                                                                                                                                                                                                                                                                                                                                                                                                                                                                                                                                                                                                                                                                                                                                                                                                                                                                                                                                                                                                                                                                                                                                                                                                                                                                                                                                                                                                                                                                                                                                                                                                                                                            |   |            |             |             |   |            |             |             |   |            |             |            |   |            |             |            |   |            |             |            |   |            |             |             |   |             |             |             |   |             |             |             |   |             |             |             |   |             |             |             |                                                                                                                                                                                                                                                                                                                                                                                                                                                                                                                                                                                                                                                                                                                                                                                                                                                                                                                                                                                                                                                                                                                                                                                                                                                                                                                                                                                                                                                                                                                                                                                                                                                                                                                                                                            |            |             |             |            |            |             |             |            |            |             |             |             |            |            |            |             |            |             |             |             |            |             |             |            |             |             |             |            |             |             |             |            |             |            |            |            |             |            |            |            |            |            |             |             |             |             |             |             |             |             |             |             |             |             |             |            |             |             |             |            |             |             |             |            |             |             |             |            |             |             |             |             |             |             |             |             |             |             |            |             |             |             |             |             |             |             |             |                                                                                                                                                                                                                                                                                                                                                                                                                                                                                                                                                                                                                                                                                                                                                                                                                                                                                                                                                                                                                                                                                                                                                                                                                                                                                                                                                                                                                                                                                                                                                                                                                                                                                                                                                                                                                                                                                                                                                                                                                                                                                                                                                                                                                                                                                                                                                                                                                                                                                                                                                                                                                                                                         |   |            |             |            |   |            |            |            |   |            |             |            |   |            |            |            |   |            |            |            |   |            |            |             |   |            |            |             |   |            |             |             |   |            |            |             |   |            |             |            |   |            |             |            |   |            |             |             |   |            |             |             |   |            |             |            |   |            |             |            |   |            |             |             |   |             |            |            |   |             |            |            |   |             |            |             |   |             |            |             |   |            |            |            |   |             |             |            |   |             |            |            |   |             |             |             |   |             |             |            |   |             |            |            |   |             |             |             |   |             |             |             |   |             |             |             |   |             |            |            |   |             |             |             |   |             |             |             |
| O                 | -0.90187100                                                                                                                                                                                                                                                                                                                                                                                                                                                                                                                                                                                                                                                                                                                                                                                                                                                                                                                                                                                                                                                                                                                                                                                                                                                                                                                                                                                                                                                                                                                                                                                                                                                                                                                                                                                                                                                                                                                                                                                                                                                                                                                                                                                                                                                                                                                                                                                                                  | -0.07522800                                                                         | 0.00003900                                                                            |             |             |   |             |             |             |   |             |             |             |   |             |             |             |   |             |             |             |   |             |            |             |   |             |             |             |   |             |             |             |   |             |             |             |   |             |             |             |   |             |             |             |   |             |             |            |   |             |             |             |   |             |             |             |   |             |             |             |   |             |             |             |   |             |             |             |   |             |             |             |                                                                                                                                                                                                                                                                                                                                                                                                                                                                                                                                                                                                                                                                                                                                                                                                                                                                                                                                                                                                                                                                                                                                                                                                                                                                                                                                                                                                                                                                                                                                                                                                                                                                                                                                                                           |            |             |             |            |            |             |             |            |            |            |            |             |            |             |             |             |            |             |             |             |            |             |             |            |            |             |             |            |            |             |            |            |            |             |             |            |            |            |            |            |            |            |            |                                                                                                                                                                                                                                                                                                                                                                                                                                                                                                                                                                                                                                                                                                                                                                                                                                                                                                                                                                                                                                                                                                                                                                                                                                                                                                                                                                                                                                                                                                                                                                                                                                                                                                                                                                                                                                                                                                                                                                                                                                                                                                                                                                                                                                                                                                                                                                                                                                                                                                                                                                                                                                                                            |   |            |             |             |   |            |             |             |   |            |             |            |   |            |             |            |   |            |             |            |   |            |             |             |   |             |             |             |   |             |             |             |   |             |             |             |   |             |             |             |                                                                                                                                                                                                                                                                                                                                                                                                                                                                                                                                                                                                                                                                                                                                                                                                                                                                                                                                                                                                                                                                                                                                                                                                                                                                                                                                                                                                                                                                                                                                                                                                                                                                                                                                                                            |            |             |             |            |            |             |             |            |            |             |             |             |            |            |            |             |            |             |             |             |            |             |             |            |             |             |             |            |             |             |             |            |             |            |            |            |             |            |            |            |            |            |             |             |             |             |             |             |             |             |             |             |             |             |             |            |             |             |             |            |             |             |             |            |             |             |             |            |             |             |             |             |             |             |             |             |             |             |            |             |             |             |             |             |             |             |             |                                                                                                                                                                                                                                                                                                                                                                                                                                                                                                                                                                                                                                                                                                                                                                                                                                                                                                                                                                                                                                                                                                                                                                                                                                                                                                                                                                                                                                                                                                                                                                                                                                                                                                                                                                                                                                                                                                                                                                                                                                                                                                                                                                                                                                                                                                                                                                                                                                                                                                                                                                                                                                                                         |   |            |             |            |   |            |            |            |   |            |             |            |   |            |            |            |   |            |            |            |   |            |            |             |   |            |            |             |   |            |             |             |   |            |            |             |   |            |             |            |   |            |             |            |   |            |             |             |   |            |             |             |   |            |             |            |   |            |             |            |   |            |             |             |   |             |            |            |   |             |            |            |   |             |            |             |   |             |            |             |   |            |            |            |   |             |             |            |   |             |            |            |   |             |             |             |   |             |             |            |   |             |            |            |   |             |             |             |   |             |             |             |   |             |             |             |   |             |            |            |   |             |             |             |   |             |             |             |
| C                 | -2.31663600                                                                                                                                                                                                                                                                                                                                                                                                                                                                                                                                                                                                                                                                                                                                                                                                                                                                                                                                                                                                                                                                                                                                                                                                                                                                                                                                                                                                                                                                                                                                                                                                                                                                                                                                                                                                                                                                                                                                                                                                                                                                                                                                                                                                                                                                                                                                                                                                                  | 0.06241100                                                                          | -0.00015000                                                                           |             |             |   |             |             |             |   |             |             |             |   |             |             |             |   |             |             |             |   |             |            |             |   |             |             |             |   |             |             |             |   |             |             |             |   |             |             |             |   |             |             |             |   |             |             |            |   |             |             |             |   |             |             |             |   |             |             |             |   |             |             |             |   |             |             |             |   |             |             |             |                                                                                                                                                                                                                                                                                                                                                                                                                                                                                                                                                                                                                                                                                                                                                                                                                                                                                                                                                                                                                                                                                                                                                                                                                                                                                                                                                                                                                                                                                                                                                                                                                                                                                                                                                                           |            |             |             |            |            |             |             |            |            |            |            |             |            |             |             |             |            |             |             |             |            |             |             |            |            |             |             |            |            |             |            |            |            |             |             |            |            |            |            |            |            |            |            |                                                                                                                                                                                                                                                                                                                                                                                                                                                                                                                                                                                                                                                                                                                                                                                                                                                                                                                                                                                                                                                                                                                                                                                                                                                                                                                                                                                                                                                                                                                                                                                                                                                                                                                                                                                                                                                                                                                                                                                                                                                                                                                                                                                                                                                                                                                                                                                                                                                                                                                                                                                                                                                                            |   |            |             |             |   |            |             |             |   |            |             |            |   |            |             |            |   |            |             |            |   |            |             |             |   |             |             |             |   |             |             |             |   |             |             |             |   |             |             |             |                                                                                                                                                                                                                                                                                                                                                                                                                                                                                                                                                                                                                                                                                                                                                                                                                                                                                                                                                                                                                                                                                                                                                                                                                                                                                                                                                                                                                                                                                                                                                                                                                                                                                                                                                                            |            |             |             |            |            |             |             |            |            |             |             |             |            |            |            |             |            |             |             |             |            |             |             |            |             |             |             |            |             |             |             |            |             |            |            |            |             |            |            |            |            |            |             |             |             |             |             |             |             |             |             |             |             |             |             |            |             |             |             |            |             |             |             |            |             |             |             |            |             |             |             |             |             |             |             |             |             |             |            |             |             |             |             |             |             |             |             |                                                                                                                                                                                                                                                                                                                                                                                                                                                                                                                                                                                                                                                                                                                                                                                                                                                                                                                                                                                                                                                                                                                                                                                                                                                                                                                                                                                                                                                                                                                                                                                                                                                                                                                                                                                                                                                                                                                                                                                                                                                                                                                                                                                                                                                                                                                                                                                                                                                                                                                                                                                                                                                                         |   |            |             |            |   |            |            |            |   |            |             |            |   |            |            |            |   |            |            |            |   |            |            |             |   |            |            |             |   |            |             |             |   |            |            |             |   |            |             |            |   |            |             |            |   |            |             |             |   |            |             |             |   |            |             |            |   |            |             |            |   |            |             |             |   |             |            |            |   |             |            |            |   |             |            |             |   |             |            |             |   |            |            |            |   |             |             |            |   |             |            |            |   |             |             |             |   |             |             |            |   |             |            |            |   |             |             |             |   |             |             |             |   |             |             |             |   |             |            |            |   |             |             |             |   |             |             |             |
| H                 | -2.63419000                                                                                                                                                                                                                                                                                                                                                                                                                                                                                                                                                                                                                                                                                                                                                                                                                                                                                                                                                                                                                                                                                                                                                                                                                                                                                                                                                                                                                                                                                                                                                                                                                                                                                                                                                                                                                                                                                                                                                                                                                                                                                                                                                                                                                                                                                                                                                                                                                  | 0.62504000                                                                          | 0.88094000                                                                            |             |             |   |             |             |             |   |             |             |             |   |             |             |             |   |             |             |             |   |             |            |             |   |             |             |             |   |             |             |             |   |             |             |             |   |             |             |             |   |             |             |             |   |             |             |            |   |             |             |             |   |             |             |             |   |             |             |             |   |             |             |             |   |             |             |             |   |             |             |             |                                                                                                                                                                                                                                                                                                                                                                                                                                                                                                                                                                                                                                                                                                                                                                                                                                                                                                                                                                                                                                                                                                                                                                                                                                                                                                                                                                                                                                                                                                                                                                                                                                                                                                                                                                           |            |             |             |            |            |             |             |            |            |            |            |             |            |             |             |             |            |             |             |             |            |             |             |            |            |             |             |            |            |             |            |            |            |             |             |            |            |            |            |            |            |            |            |                                                                                                                                                                                                                                                                                                                                                                                                                                                                                                                                                                                                                                                                                                                                                                                                                                                                                                                                                                                                                                                                                                                                                                                                                                                                                                                                                                                                                                                                                                                                                                                                                                                                                                                                                                                                                                                                                                                                                                                                                                                                                                                                                                                                                                                                                                                                                                                                                                                                                                                                                                                                                                                                            |   |            |             |             |   |            |             |             |   |            |             |            |   |            |             |            |   |            |             |            |   |            |             |             |   |             |             |             |   |             |             |             |   |             |             |             |   |             |             |             |                                                                                                                                                                                                                                                                                                                                                                                                                                                                                                                                                                                                                                                                                                                                                                                                                                                                                                                                                                                                                                                                                                                                                                                                                                                                                                                                                                                                                                                                                                                                                                                                                                                                                                                                                                            |            |             |             |            |            |             |             |            |            |             |             |             |            |            |            |             |            |             |             |             |            |             |             |            |             |             |             |            |             |             |             |            |             |            |            |            |             |            |            |            |            |            |             |             |             |             |             |             |             |             |             |             |             |             |             |            |             |             |             |            |             |             |             |            |             |             |             |            |             |             |             |             |             |             |             |             |             |             |            |             |             |             |             |             |             |             |             |                                                                                                                                                                                                                                                                                                                                                                                                                                                                                                                                                                                                                                                                                                                                                                                                                                                                                                                                                                                                                                                                                                                                                                                                                                                                                                                                                                                                                                                                                                                                                                                                                                                                                                                                                                                                                                                                                                                                                                                                                                                                                                                                                                                                                                                                                                                                                                                                                                                                                                                                                                                                                                                                         |   |            |             |            |   |            |            |            |   |            |             |            |   |            |            |            |   |            |            |            |   |            |            |             |   |            |            |             |   |            |             |             |   |            |            |             |   |            |             |            |   |            |             |            |   |            |             |             |   |            |             |             |   |            |             |            |   |            |             |            |   |            |             |             |   |             |            |            |   |             |            |            |   |             |            |             |   |             |            |             |   |            |            |            |   |             |             |            |   |             |            |            |   |             |             |             |   |             |             |            |   |             |            |            |   |             |             |             |   |             |             |             |   |             |             |             |   |             |            |            |   |             |             |             |   |             |             |             |
| H                 | -2.63392700                                                                                                                                                                                                                                                                                                                                                                                                                                                                                                                                                                                                                                                                                                                                                                                                                                                                                                                                                                                                                                                                                                                                                                                                                                                                                                                                                                                                                                                                                                                                                                                                                                                                                                                                                                                                                                                                                                                                                                                                                                                                                                                                                                                                                                                                                                                                                                                                                  | 0.62536100                                                                          | -0.88112400                                                                           |             |             |   |             |             |             |   |             |             |             |   |             |             |             |   |             |             |             |   |             |            |             |   |             |             |             |   |             |             |             |   |             |             |             |   |             |             |             |   |             |             |             |   |             |             |            |   |             |             |             |   |             |             |             |   |             |             |             |   |             |             |             |   |             |             |             |   |             |             |             |                                                                                                                                                                                                                                                                                                                                                                                                                                                                                                                                                                                                                                                                                                                                                                                                                                                                                                                                                                                                                                                                                                                                                                                                                                                                                                                                                                                                                                                                                                                                                                                                                                                                                                                                                                           |            |             |             |            |            |             |             |            |            |            |            |             |            |             |             |             |            |             |             |             |            |             |             |            |            |             |             |            |            |             |            |            |            |             |             |            |            |            |            |            |            |            |            |                                                                                                                                                                                                                                                                                                                                                                                                                                                                                                                                                                                                                                                                                                                                                                                                                                                                                                                                                                                                                                                                                                                                                                                                                                                                                                                                                                                                                                                                                                                                                                                                                                                                                                                                                                                                                                                                                                                                                                                                                                                                                                                                                                                                                                                                                                                                                                                                                                                                                                                                                                                                                                                                            |   |            |             |             |   |            |             |             |   |            |             |            |   |            |             |            |   |            |             |            |   |            |             |             |   |             |             |             |   |             |             |             |   |             |             |             |   |             |             |             |                                                                                                                                                                                                                                                                                                                                                                                                                                                                                                                                                                                                                                                                                                                                                                                                                                                                                                                                                                                                                                                                                                                                                                                                                                                                                                                                                                                                                                                                                                                                                                                                                                                                                                                                                                            |            |             |             |            |            |             |             |            |            |             |             |             |            |            |            |             |            |             |             |             |            |             |             |            |             |             |             |            |             |             |             |            |             |            |            |            |             |            |            |            |            |            |             |             |             |             |             |             |             |             |             |             |             |             |             |            |             |             |             |            |             |             |             |            |             |             |             |            |             |             |             |             |             |             |             |             |             |             |            |             |             |             |             |             |             |             |             |                                                                                                                                                                                                                                                                                                                                                                                                                                                                                                                                                                                                                                                                                                                                                                                                                                                                                                                                                                                                                                                                                                                                                                                                                                                                                                                                                                                                                                                                                                                                                                                                                                                                                                                                                                                                                                                                                                                                                                                                                                                                                                                                                                                                                                                                                                                                                                                                                                                                                                                                                                                                                                                                         |   |            |             |            |   |            |            |            |   |            |             |            |   |            |            |            |   |            |            |            |   |            |            |             |   |            |            |             |   |            |             |             |   |            |            |             |   |            |             |            |   |            |             |            |   |            |             |             |   |            |             |             |   |            |             |            |   |            |             |            |   |            |             |             |   |             |            |            |   |             |            |            |   |             |            |             |   |             |            |             |   |            |            |            |   |             |             |            |   |             |            |            |   |             |             |             |   |             |             |            |   |             |            |            |   |             |             |             |   |             |             |             |   |             |             |             |   |             |            |            |   |             |             |             |   |             |             |             |
| C                 | 2.03538400                                                                                                                                                                                                                                                                                                                                                                                                                                                                                                                                                                                                                                                                                                                                                                                                                                                                                                                                                                                                                                                                                                                                                                                                                                                                                                                                                                                                                                                                                                                                                                                                                                                                                                                                                                                                                                                                                                                                                                                                                                                                                                                                                                                                                                                                                                                                                                                                                   | -0.26006400                                                                         | 0.00024500                                                                            |             |             |   |             |             |             |   |             |             |             |   |             |             |             |   |             |             |             |   |             |            |             |   |             |             |             |   |             |             |             |   |             |             |             |   |             |             |             |   |             |             |             |   |             |             |            |   |             |             |             |   |             |             |             |   |             |             |             |   |             |             |             |   |             |             |             |   |             |             |             |                                                                                                                                                                                                                                                                                                                                                                                                                                                                                                                                                                                                                                                                                                                                                                                                                                                                                                                                                                                                                                                                                                                                                                                                                                                                                                                                                                                                                                                                                                                                                                                                                                                                                                                                                                           |            |             |             |            |            |             |             |            |            |            |            |             |            |             |             |             |            |             |             |             |            |             |             |            |            |             |             |            |            |             |            |            |            |             |             |            |            |            |            |            |            |            |            |                                                                                                                                                                                                                                                                                                                                                                                                                                                                                                                                                                                                                                                                                                                                                                                                                                                                                                                                                                                                                                                                                                                                                                                                                                                                                                                                                                                                                                                                                                                                                                                                                                                                                                                                                                                                                                                                                                                                                                                                                                                                                                                                                                                                                                                                                                                                                                                                                                                                                                                                                                                                                                                                            |   |            |             |             |   |            |             |             |   |            |             |            |   |            |             |            |   |            |             |            |   |            |             |             |   |             |             |             |   |             |             |             |   |             |             |             |   |             |             |             |                                                                                                                                                                                                                                                                                                                                                                                                                                                                                                                                                                                                                                                                                                                                                                                                                                                                                                                                                                                                                                                                                                                                                                                                                                                                                                                                                                                                                                                                                                                                                                                                                                                                                                                                                                            |            |             |             |            |            |             |             |            |            |             |             |             |            |            |            |             |            |             |             |             |            |             |             |            |             |             |             |            |             |             |             |            |             |            |            |            |             |            |            |            |            |            |             |             |             |             |             |             |             |             |             |             |             |             |             |            |             |             |             |            |             |             |             |            |             |             |             |            |             |             |             |             |             |             |             |             |             |             |            |             |             |             |             |             |             |             |             |                                                                                                                                                                                                                                                                                                                                                                                                                                                                                                                                                                                                                                                                                                                                                                                                                                                                                                                                                                                                                                                                                                                                                                                                                                                                                                                                                                                                                                                                                                                                                                                                                                                                                                                                                                                                                                                                                                                                                                                                                                                                                                                                                                                                                                                                                                                                                                                                                                                                                                                                                                                                                                                                         |   |            |             |            |   |            |            |            |   |            |             |            |   |            |            |            |   |            |            |            |   |            |            |             |   |            |            |             |   |            |             |             |   |            |            |             |   |            |             |            |   |            |             |            |   |            |             |             |   |            |             |             |   |            |             |            |   |            |             |            |   |            |             |             |   |             |            |            |   |             |            |            |   |             |            |             |   |             |            |             |   |            |            |            |   |             |             |            |   |             |            |            |   |             |             |             |   |             |             |            |   |             |            |            |   |             |             |             |   |             |             |             |   |             |             |             |   |             |            |            |   |             |             |             |   |             |             |             |
| O                 | 3.28747600                                                                                                                                                                                                                                                                                                                                                                                                                                                                                                                                                                                                                                                                                                                                                                                                                                                                                                                                                                                                                                                                                                                                                                                                                                                                                                                                                                                                                                                                                                                                                                                                                                                                                                                                                                                                                                                                                                                                                                                                                                                                                                                                                                                                                                                                                                                                                                                                                   | -0.20132200                                                                         | 0.00009100                                                                            |             |             |   |             |             |             |   |             |             |             |   |             |             |             |   |             |             |             |   |             |            |             |   |             |             |             |   |             |             |             |   |             |             |             |   |             |             |             |   |             |             |             |   |             |             |            |   |             |             |             |   |             |             |             |   |             |             |             |   |             |             |             |   |             |             |             |   |             |             |             |                                                                                                                                                                                                                                                                                                                                                                                                                                                                                                                                                                                                                                                                                                                                                                                                                                                                                                                                                                                                                                                                                                                                                                                                                                                                                                                                                                                                                                                                                                                                                                                                                                                                                                                                                                           |            |             |             |            |            |             |             |            |            |            |            |             |            |             |             |             |            |             |             |             |            |             |             |            |            |             |             |            |            |             |            |            |            |             |             |            |            |            |            |            |            |            |            |                                                                                                                                                                                                                                                                                                                                                                                                                                                                                                                                                                                                                                                                                                                                                                                                                                                                                                                                                                                                                                                                                                                                                                                                                                                                                                                                                                                                                                                                                                                                                                                                                                                                                                                                                                                                                                                                                                                                                                                                                                                                                                                                                                                                                                                                                                                                                                                                                                                                                                                                                                                                                                                                            |   |            |             |             |   |            |             |             |   |            |             |            |   |            |             |            |   |            |             |            |   |            |             |             |   |             |             |             |   |             |             |             |   |             |             |             |   |             |             |             |                                                                                                                                                                                                                                                                                                                                                                                                                                                                                                                                                                                                                                                                                                                                                                                                                                                                                                                                                                                                                                                                                                                                                                                                                                                                                                                                                                                                                                                                                                                                                                                                                                                                                                                                                                            |            |             |             |            |            |             |             |            |            |             |             |             |            |            |            |             |            |             |             |             |            |             |             |            |             |             |             |            |             |             |             |            |             |            |            |            |             |            |            |            |            |            |             |             |             |             |             |             |             |             |             |             |             |             |             |            |             |             |             |            |             |             |             |            |             |             |             |            |             |             |             |             |             |             |             |             |             |             |            |             |             |             |             |             |             |             |             |                                                                                                                                                                                                                                                                                                                                                                                                                                                                                                                                                                                                                                                                                                                                                                                                                                                                                                                                                                                                                                                                                                                                                                                                                                                                                                                                                                                                                                                                                                                                                                                                                                                                                                                                                                                                                                                                                                                                                                                                                                                                                                                                                                                                                                                                                                                                                                                                                                                                                                                                                                                                                                                                         |   |            |             |            |   |            |            |            |   |            |             |            |   |            |            |            |   |            |            |            |   |            |            |             |   |            |            |             |   |            |             |             |   |            |            |             |   |            |             |            |   |            |             |            |   |            |             |             |   |            |             |             |   |            |             |            |   |            |             |            |   |            |             |             |   |             |            |            |   |             |            |            |   |             |            |             |   |             |            |             |   |            |            |            |   |             |             |            |   |             |            |            |   |             |             |             |   |             |             |            |   |             |            |            |   |             |             |             |   |             |             |             |   |             |             |             |   |             |            |            |   |             |             |             |   |             |             |             |
| C                 | 1.41259400                                                                                                                                                                                                                                                                                                                                                                                                                                                                                                                                                                                                                                                                                                                                                                                                                                                                                                                                                                                                                                                                                                                                                                                                                                                                                                                                                                                                                                                                                                                                                                                                                                                                                                                                                                                                                                                                                                                                                                                                                                                                                                                                                                                                                                                                                                                                                                                                                   | -1.64876400                                                                         | 0.00035800                                                                            |             |             |   |             |             |             |   |             |             |             |   |             |             |             |   |             |             |             |   |             |            |             |   |             |             |             |   |             |             |             |   |             |             |             |   |             |             |             |   |             |             |             |   |             |             |            |   |             |             |             |   |             |             |             |   |             |             |             |   |             |             |             |   |             |             |             |   |             |             |             |                                                                                                                                                                                                                                                                                                                                                                                                                                                                                                                                                                                                                                                                                                                                                                                                                                                                                                                                                                                                                                                                                                                                                                                                                                                                                                                                                                                                                                                                                                                                                                                                                                                                                                                                                                           |            |             |             |            |            |             |             |            |            |            |            |             |            |             |             |             |            |             |             |             |            |             |             |            |            |             |             |            |            |             |            |            |            |             |             |            |            |            |            |            |            |            |            |                                                                                                                                                                                                                                                                                                                                                                                                                                                                                                                                                                                                                                                                                                                                                                                                                                                                                                                                                                                                                                                                                                                                                                                                                                                                                                                                                                                                                                                                                                                                                                                                                                                                                                                                                                                                                                                                                                                                                                                                                                                                                                                                                                                                                                                                                                                                                                                                                                                                                                                                                                                                                                                                            |   |            |             |             |   |            |             |             |   |            |             |            |   |            |             |            |   |            |             |            |   |            |             |             |   |             |             |             |   |             |             |             |   |             |             |             |   |             |             |             |                                                                                                                                                                                                                                                                                                                                                                                                                                                                                                                                                                                                                                                                                                                                                                                                                                                                                                                                                                                                                                                                                                                                                                                                                                                                                                                                                                                                                                                                                                                                                                                                                                                                                                                                                                            |            |             |             |            |            |             |             |            |            |             |             |             |            |            |            |             |            |             |             |             |            |             |             |            |             |             |             |            |             |             |             |            |             |            |            |            |             |            |            |            |            |            |             |             |             |             |             |             |             |             |             |             |             |             |             |            |             |             |             |            |             |             |             |            |             |             |             |            |             |             |             |             |             |             |             |             |             |             |            |             |             |             |             |             |             |             |             |                                                                                                                                                                                                                                                                                                                                                                                                                                                                                                                                                                                                                                                                                                                                                                                                                                                                                                                                                                                                                                                                                                                                                                                                                                                                                                                                                                                                                                                                                                                                                                                                                                                                                                                                                                                                                                                                                                                                                                                                                                                                                                                                                                                                                                                                                                                                                                                                                                                                                                                                                                                                                                                                         |   |            |             |            |   |            |            |            |   |            |             |            |   |            |            |            |   |            |            |            |   |            |            |             |   |            |            |             |   |            |             |             |   |            |            |             |   |            |             |            |   |            |             |            |   |            |             |             |   |            |             |             |   |            |             |            |   |            |             |            |   |            |             |             |   |             |            |            |   |             |            |            |   |             |            |             |   |             |            |             |   |            |            |            |   |             |             |            |   |             |            |            |   |             |             |             |   |             |             |            |   |             |            |            |   |             |             |             |   |             |             |             |   |             |             |             |   |             |            |            |   |             |             |             |   |             |             |             |
| H                 | 0.77786600                                                                                                                                                                                                                                                                                                                                                                                                                                                                                                                                                                                                                                                                                                                                                                                                                                                                                                                                                                                                                                                                                                                                                                                                                                                                                                                                                                                                                                                                                                                                                                                                                                                                                                                                                                                                                                                                                                                                                                                                                                                                                                                                                                                                                                                                                                                                                                                                                   | -1.79796600                                                                         | -0.87360000                                                                           |             |             |   |             |             |             |   |             |             |             |   |             |             |             |   |             |             |             |   |             |            |             |   |             |             |             |   |             |             |             |   |             |             |             |   |             |             |             |   |             |             |             |   |             |             |            |   |             |             |             |   |             |             |             |   |             |             |             |   |             |             |             |   |             |             |             |   |             |             |             |                                                                                                                                                                                                                                                                                                                                                                                                                                                                                                                                                                                                                                                                                                                                                                                                                                                                                                                                                                                                                                                                                                                                                                                                                                                                                                                                                                                                                                                                                                                                                                                                                                                                                                                                                                           |            |             |             |            |            |             |             |            |            |            |            |             |            |             |             |             |            |             |             |             |            |             |             |            |            |             |             |            |            |             |            |            |            |             |             |            |            |            |            |            |            |            |            |                                                                                                                                                                                                                                                                                                                                                                                                                                                                                                                                                                                                                                                                                                                                                                                                                                                                                                                                                                                                                                                                                                                                                                                                                                                                                                                                                                                                                                                                                                                                                                                                                                                                                                                                                                                                                                                                                                                                                                                                                                                                                                                                                                                                                                                                                                                                                                                                                                                                                                                                                                                                                                                                            |   |            |             |             |   |            |             |             |   |            |             |            |   |            |             |            |   |            |             |            |   |            |             |             |   |             |             |             |   |             |             |             |   |             |             |             |   |             |             |             |                                                                                                                                                                                                                                                                                                                                                                                                                                                                                                                                                                                                                                                                                                                                                                                                                                                                                                                                                                                                                                                                                                                                                                                                                                                                                                                                                                                                                                                                                                                                                                                                                                                                                                                                                                            |            |             |             |            |            |             |             |            |            |             |             |             |            |            |            |             |            |             |             |             |            |             |             |            |             |             |             |            |             |             |             |            |             |            |            |            |             |            |            |            |            |            |             |             |             |             |             |             |             |             |             |             |             |             |             |            |             |             |             |            |             |             |             |            |             |             |             |            |             |             |             |             |             |             |             |             |             |             |            |             |             |             |             |             |             |             |             |                                                                                                                                                                                                                                                                                                                                                                                                                                                                                                                                                                                                                                                                                                                                                                                                                                                                                                                                                                                                                                                                                                                                                                                                                                                                                                                                                                                                                                                                                                                                                                                                                                                                                                                                                                                                                                                                                                                                                                                                                                                                                                                                                                                                                                                                                                                                                                                                                                                                                                                                                                                                                                                                         |   |            |             |            |   |            |            |            |   |            |             |            |   |            |            |            |   |            |            |            |   |            |            |             |   |            |            |             |   |            |             |             |   |            |            |             |   |            |             |            |   |            |             |            |   |            |             |             |   |            |             |             |   |            |             |            |   |            |             |            |   |            |             |             |   |             |            |            |   |             |            |            |   |             |            |             |   |             |            |             |   |            |            |            |   |             |             |            |   |             |            |            |   |             |             |             |   |             |             |            |   |             |            |            |   |             |             |             |   |             |             |             |   |             |             |             |   |             |            |            |   |             |             |             |   |             |             |             |
| H                 | 2.21276600                                                                                                                                                                                                                                                                                                                                                                                                                                                                                                                                                                                                                                                                                                                                                                                                                                                                                                                                                                                                                                                                                                                                                                                                                                                                                                                                                                                                                                                                                                                                                                                                                                                                                                                                                                                                                                                                                                                                                                                                                                                                                                                                                                                                                                                                                                                                                                                                                   | -2.38772000                                                                         | 0.00049300                                                                            |             |             |   |             |             |             |   |             |             |             |   |             |             |             |   |             |             |             |   |             |            |             |   |             |             |             |   |             |             |             |   |             |             |             |   |             |             |             |   |             |             |             |   |             |             |            |   |             |             |             |   |             |             |             |   |             |             |             |   |             |             |             |   |             |             |             |   |             |             |             |                                                                                                                                                                                                                                                                                                                                                                                                                                                                                                                                                                                                                                                                                                                                                                                                                                                                                                                                                                                                                                                                                                                                                                                                                                                                                                                                                                                                                                                                                                                                                                                                                                                                                                                                                                           |            |             |             |            |            |             |             |            |            |            |            |             |            |             |             |             |            |             |             |             |            |             |             |            |            |             |             |            |            |             |            |            |            |             |             |            |            |            |            |            |            |            |            |                                                                                                                                                                                                                                                                                                                                                                                                                                                                                                                                                                                                                                                                                                                                                                                                                                                                                                                                                                                                                                                                                                                                                                                                                                                                                                                                                                                                                                                                                                                                                                                                                                                                                                                                                                                                                                                                                                                                                                                                                                                                                                                                                                                                                                                                                                                                                                                                                                                                                                                                                                                                                                                                            |   |            |             |             |   |            |             |             |   |            |             |            |   |            |             |            |   |            |             |            |   |            |             |             |   |             |             |             |   |             |             |             |   |             |             |             |   |             |             |             |                                                                                                                                                                                                                                                                                                                                                                                                                                                                                                                                                                                                                                                                                                                                                                                                                                                                                                                                                                                                                                                                                                                                                                                                                                                                                                                                                                                                                                                                                                                                                                                                                                                                                                                                                                            |            |             |             |            |            |             |             |            |            |             |             |             |            |            |            |             |            |             |             |             |            |             |             |            |             |             |             |            |             |             |             |            |             |            |            |            |             |            |            |            |            |            |             |             |             |             |             |             |             |             |             |             |             |             |             |            |             |             |             |            |             |             |             |            |             |             |             |            |             |             |             |             |             |             |             |             |             |             |            |             |             |             |             |             |             |             |             |                                                                                                                                                                                                                                                                                                                                                                                                                                                                                                                                                                                                                                                                                                                                                                                                                                                                                                                                                                                                                                                                                                                                                                                                                                                                                                                                                                                                                                                                                                                                                                                                                                                                                                                                                                                                                                                                                                                                                                                                                                                                                                                                                                                                                                                                                                                                                                                                                                                                                                                                                                                                                                                                         |   |            |             |            |   |            |            |            |   |            |             |            |   |            |            |            |   |            |            |            |   |            |            |             |   |            |            |             |   |            |             |             |   |            |            |             |   |            |             |            |   |            |             |            |   |            |             |             |   |            |             |             |   |            |             |            |   |            |             |            |   |            |             |             |   |             |            |            |   |             |            |            |   |             |            |             |   |             |            |             |   |            |            |            |   |             |             |            |   |             |            |            |   |             |             |             |   |             |             |            |   |             |            |            |   |             |             |             |   |             |             |             |   |             |             |             |   |             |            |            |   |             |             |             |   |             |             |             |
| H                 | 0.77773300                                                                                                                                                                                                                                                                                                                                                                                                                                                                                                                                                                                                                                                                                                                                                                                                                                                                                                                                                                                                                                                                                                                                                                                                                                                                                                                                                                                                                                                                                                                                                                                                                                                                                                                                                                                                                                                                                                                                                                                                                                                                                                                                                                                                                                                                                                                                                                                                                   | -1.79778500                                                                         | 0.87424600                                                                            |             |             |   |             |             |             |   |             |             |             |   |             |             |             |   |             |             |             |   |             |            |             |   |             |             |             |   |             |             |             |   |             |             |             |   |             |             |             |   |             |             |             |   |             |             |            |   |             |             |             |   |             |             |             |   |             |             |             |   |             |             |             |   |             |             |             |   |             |             |             |                                                                                                                                                                                                                                                                                                                                                                                                                                                                                                                                                                                                                                                                                                                                                                                                                                                                                                                                                                                                                                                                                                                                                                                                                                                                                                                                                                                                                                                                                                                                                                                                                                                                                                                                                                           |            |             |             |            |            |             |             |            |            |            |            |             |            |             |             |             |            |             |             |             |            |             |             |            |            |             |             |            |            |             |            |            |            |             |             |            |            |            |            |            |            |            |            |                                                                                                                                                                                                                                                                                                                                                                                                                                                                                                                                                                                                                                                                                                                                                                                                                                                                                                                                                                                                                                                                                                                                                                                                                                                                                                                                                                                                                                                                                                                                                                                                                                                                                                                                                                                                                                                                                                                                                                                                                                                                                                                                                                                                                                                                                                                                                                                                                                                                                                                                                                                                                                                                            |   |            |             |             |   |            |             |             |   |            |             |            |   |            |             |            |   |            |             |            |   |            |             |             |   |             |             |             |   |             |             |             |   |             |             |             |   |             |             |             |                                                                                                                                                                                                                                                                                                                                                                                                                                                                                                                                                                                                                                                                                                                                                                                                                                                                                                                                                                                                                                                                                                                                                                                                                                                                                                                                                                                                                                                                                                                                                                                                                                                                                                                                                                            |            |             |             |            |            |             |             |            |            |             |             |             |            |            |            |             |            |             |             |             |            |             |             |            |             |             |             |            |             |             |             |            |             |            |            |            |             |            |            |            |            |            |             |             |             |             |             |             |             |             |             |             |             |             |             |            |             |             |             |            |             |             |             |            |             |             |             |            |             |             |             |             |             |             |             |             |             |             |            |             |             |             |             |             |             |             |             |                                                                                                                                                                                                                                                                                                                                                                                                                                                                                                                                                                                                                                                                                                                                                                                                                                                                                                                                                                                                                                                                                                                                                                                                                                                                                                                                                                                                                                                                                                                                                                                                                                                                                                                                                                                                                                                                                                                                                                                                                                                                                                                                                                                                                                                                                                                                                                                                                                                                                                                                                                                                                                                                         |   |            |             |            |   |            |            |            |   |            |             |            |   |            |            |            |   |            |            |            |   |            |            |             |   |            |            |             |   |            |             |             |   |            |            |             |   |            |             |            |   |            |             |            |   |            |             |             |   |            |             |             |   |            |             |            |   |            |             |            |   |            |             |             |   |             |            |            |   |             |            |            |   |             |            |             |   |             |            |             |   |            |            |            |   |             |             |            |   |             |            |            |   |             |             |             |   |             |             |            |   |             |            |            |   |             |             |             |   |             |             |             |   |             |             |             |   |             |            |            |   |             |             |             |   |             |             |             |
| C                 | -2.91252000                                                                                                                                                                                                                                                                                                                                                                                                                                                                                                                                                                                                                                                                                                                                                                                                                                                                                                                                                                                                                                                                                                                                                                                                                                                                                                                                                                                                                                                                                                                                                                                                                                                                                                                                                                                                                                                                                                                                                                                                                                                                                                                                                                                                                                                                                                                                                                                                                  | -1.32653500                                                                         | -0.00048300                                                                           |             |             |   |             |             |             |   |             |             |             |   |             |             |             |   |             |             |             |   |             |            |             |   |             |             |             |   |             |             |             |   |             |             |             |   |             |             |             |   |             |             |             |   |             |             |            |   |             |             |             |   |             |             |             |   |             |             |             |   |             |             |             |   |             |             |             |   |             |             |             |                                                                                                                                                                                                                                                                                                                                                                                                                                                                                                                                                                                                                                                                                                                                                                                                                                                                                                                                                                                                                                                                                                                                                                                                                                                                                                                                                                                                                                                                                                                                                                                                                                                                                                                                                                           |            |             |             |            |            |             |             |            |            |            |            |             |            |             |             |             |            |             |             |             |            |             |             |            |            |             |             |            |            |             |            |            |            |             |             |            |            |            |            |            |            |            |            |                                                                                                                                                                                                                                                                                                                                                                                                                                                                                                                                                                                                                                                                                                                                                                                                                                                                                                                                                                                                                                                                                                                                                                                                                                                                                                                                                                                                                                                                                                                                                                                                                                                                                                                                                                                                                                                                                                                                                                                                                                                                                                                                                                                                                                                                                                                                                                                                                                                                                                                                                                                                                                                                            |   |            |             |             |   |            |             |             |   |            |             |            |   |            |             |            |   |            |             |            |   |            |             |             |   |             |             |             |   |             |             |             |   |             |             |             |   |             |             |             |                                                                                                                                                                                                                                                                                                                                                                                                                                                                                                                                                                                                                                                                                                                                                                                                                                                                                                                                                                                                                                                                                                                                                                                                                                                                                                                                                                                                                                                                                                                                                                                                                                                                                                                                                                            |            |             |             |            |            |             |             |            |            |             |             |             |            |            |            |             |            |             |             |             |            |             |             |            |             |             |             |            |             |             |             |            |             |            |            |            |             |            |            |            |            |            |             |             |             |             |             |             |             |             |             |             |             |             |             |            |             |             |             |            |             |             |             |            |             |             |             |            |             |             |             |             |             |             |             |             |             |             |            |             |             |             |             |             |             |             |             |                                                                                                                                                                                                                                                                                                                                                                                                                                                                                                                                                                                                                                                                                                                                                                                                                                                                                                                                                                                                                                                                                                                                                                                                                                                                                                                                                                                                                                                                                                                                                                                                                                                                                                                                                                                                                                                                                                                                                                                                                                                                                                                                                                                                                                                                                                                                                                                                                                                                                                                                                                                                                                                                         |   |            |             |            |   |            |            |            |   |            |             |            |   |            |            |            |   |            |            |            |   |            |            |             |   |            |            |             |   |            |             |             |   |            |            |             |   |            |             |            |   |            |             |            |   |            |             |             |   |            |             |             |   |            |             |            |   |            |             |            |   |            |             |             |   |             |            |            |   |             |            |            |   |             |            |             |   |             |            |             |   |            |            |            |   |             |             |            |   |             |            |            |   |             |             |             |   |             |             |            |   |             |            |            |   |             |             |             |   |             |             |             |   |             |             |             |   |             |            |            |   |             |             |             |   |             |             |             |
| H                 | -2.60197600                                                                                                                                                                                                                                                                                                                                                                                                                                                                                                                                                                                                                                                                                                                                                                                                                                                                                                                                                                                                                                                                                                                                                                                                                                                                                                                                                                                                                                                                                                                                                                                                                                                                                                                                                                                                                                                                                                                                                                                                                                                                                                                                                                                                                                                                                                                                                                                                                  | -1.88349900                                                                         | 0.88489900                                                                            |             |             |   |             |             |             |   |             |             |             |   |             |             |             |   |             |             |             |   |             |            |             |   |             |             |             |   |             |             |             |   |             |             |             |   |             |             |             |   |             |             |             |   |             |             |            |   |             |             |             |   |             |             |             |   |             |             |             |   |             |             |             |   |             |             |             |   |             |             |             |                                                                                                                                                                                                                                                                                                                                                                                                                                                                                                                                                                                                                                                                                                                                                                                                                                                                                                                                                                                                                                                                                                                                                                                                                                                                                                                                                                                                                                                                                                                                                                                                                                                                                                                                                                           |            |             |             |            |            |             |             |            |            |            |            |             |            |             |             |             |            |             |             |             |            |             |             |            |            |             |             |            |            |             |            |            |            |             |             |            |            |            |            |            |            |            |            |                                                                                                                                                                                                                                                                                                                                                                                                                                                                                                                                                                                                                                                                                                                                                                                                                                                                                                                                                                                                                                                                                                                                                                                                                                                                                                                                                                                                                                                                                                                                                                                                                                                                                                                                                                                                                                                                                                                                                                                                                                                                                                                                                                                                                                                                                                                                                                                                                                                                                                                                                                                                                                                                            |   |            |             |             |   |            |             |             |   |            |             |            |   |            |             |            |   |            |             |            |   |            |             |             |   |             |             |             |   |             |             |             |   |             |             |             |   |             |             |             |                                                                                                                                                                                                                                                                                                                                                                                                                                                                                                                                                                                                                                                                                                                                                                                                                                                                                                                                                                                                                                                                                                                                                                                                                                                                                                                                                                                                                                                                                                                                                                                                                                                                                                                                                                            |            |             |             |            |            |             |             |            |            |             |             |             |            |            |            |             |            |             |             |             |            |             |             |            |             |             |             |            |             |             |             |            |             |            |            |            |             |            |            |            |            |            |             |             |             |             |             |             |             |             |             |             |             |             |             |            |             |             |             |            |             |             |             |            |             |             |             |            |             |             |             |             |             |             |             |             |             |             |            |             |             |             |             |             |             |             |             |                                                                                                                                                                                                                                                                                                                                                                                                                                                                                                                                                                                                                                                                                                                                                                                                                                                                                                                                                                                                                                                                                                                                                                                                                                                                                                                                                                                                                                                                                                                                                                                                                                                                                                                                                                                                                                                                                                                                                                                                                                                                                                                                                                                                                                                                                                                                                                                                                                                                                                                                                                                                                                                                         |   |            |             |            |   |            |            |            |   |            |             |            |   |            |            |            |   |            |            |            |   |            |            |             |   |            |            |             |   |            |             |             |   |            |            |             |   |            |             |            |   |            |             |            |   |            |             |             |   |            |             |             |   |            |             |            |   |            |             |            |   |            |             |             |   |             |            |            |   |             |            |            |   |             |            |             |   |             |            |             |   |            |            |            |   |             |             |            |   |             |            |            |   |             |             |             |   |             |             |            |   |             |            |            |   |             |             |             |   |             |             |             |   |             |             |             |   |             |            |            |   |             |             |             |   |             |             |             |
| H                 | -4.00166600                                                                                                                                                                                                                                                                                                                                                                                                                                                                                                                                                                                                                                                                                                                                                                                                                                                                                                                                                                                                                                                                                                                                                                                                                                                                                                                                                                                                                                                                                                                                                                                                                                                                                                                                                                                                                                                                                                                                                                                                                                                                                                                                                                                                                                                                                                                                                                                                                  | -1.26133100                                                                         | -0.00059600                                                                           |             |             |   |             |             |             |   |             |             |             |   |             |             |             |   |             |             |             |   |             |            |             |   |             |             |             |   |             |             |             |   |             |             |             |   |             |             |             |   |             |             |             |   |             |             |            |   |             |             |             |   |             |             |             |   |             |             |             |   |             |             |             |   |             |             |             |   |             |             |             |                                                                                                                                                                                                                                                                                                                                                                                                                                                                                                                                                                                                                                                                                                                                                                                                                                                                                                                                                                                                                                                                                                                                                                                                                                                                                                                                                                                                                                                                                                                                                                                                                                                                                                                                                                           |            |             |             |            |            |             |             |            |            |            |            |             |            |             |             |             |            |             |             |             |            |             |             |            |            |             |             |            |            |             |            |            |            |             |             |            |            |            |            |            |            |            |            |                                                                                                                                                                                                                                                                                                                                                                                                                                                                                                                                                                                                                                                                                                                                                                                                                                                                                                                                                                                                                                                                                                                                                                                                                                                                                                                                                                                                                                                                                                                                                                                                                                                                                                                                                                                                                                                                                                                                                                                                                                                                                                                                                                                                                                                                                                                                                                                                                                                                                                                                                                                                                                                                            |   |            |             |             |   |            |             |             |   |            |             |            |   |            |             |            |   |            |             |            |   |            |             |             |   |             |             |             |   |             |             |             |   |             |             |             |   |             |             |             |                                                                                                                                                                                                                                                                                                                                                                                                                                                                                                                                                                                                                                                                                                                                                                                                                                                                                                                                                                                                                                                                                                                                                                                                                                                                                                                                                                                                                                                                                                                                                                                                                                                                                                                                                                            |            |             |             |            |            |             |             |            |            |             |             |             |            |            |            |             |            |             |             |             |            |             |             |            |             |             |             |            |             |             |             |            |             |            |            |            |             |            |            |            |            |            |             |             |             |             |             |             |             |             |             |             |             |             |             |            |             |             |             |            |             |             |             |            |             |             |             |            |             |             |             |             |             |             |             |             |             |             |            |             |             |             |             |             |             |             |             |                                                                                                                                                                                                                                                                                                                                                                                                                                                                                                                                                                                                                                                                                                                                                                                                                                                                                                                                                                                                                                                                                                                                                                                                                                                                                                                                                                                                                                                                                                                                                                                                                                                                                                                                                                                                                                                                                                                                                                                                                                                                                                                                                                                                                                                                                                                                                                                                                                                                                                                                                                                                                                                                         |   |            |             |            |   |            |            |            |   |            |             |            |   |            |            |            |   |            |            |            |   |            |            |             |   |            |            |             |   |            |             |             |   |            |            |             |   |            |             |            |   |            |             |            |   |            |             |             |   |            |             |             |   |            |             |            |   |            |             |            |   |            |             |             |   |             |            |            |   |             |            |            |   |             |            |             |   |             |            |             |   |            |            |            |   |             |             |            |   |             |            |            |   |             |             |             |   |             |             |            |   |             |            |            |   |             |             |             |   |             |             |             |   |             |             |             |   |             |            |            |   |             |             |             |   |             |             |             |
| H                 | -2.60176900                                                                                                                                                                                                                                                                                                                                                                                                                                                                                                                                                                                                                                                                                                                                                                                                                                                                                                                                                                                                                                                                                                                                                                                                                                                                                                                                                                                                                                                                                                                                                                                                                                                                                                                                                                                                                                                                                                                                                                                                                                                                                                                                                                                                                                                                                                                                                                                                                  | -1.88315700                                                                         | -0.88600800                                                                           |             |             |   |             |             |             |   |             |             |             |   |             |             |             |   |             |             |             |   |             |            |             |   |             |             |             |   |             |             |             |   |             |             |             |   |             |             |             |   |             |             |             |   |             |             |            |   |             |             |             |   |             |             |             |   |             |             |             |   |             |             |             |   |             |             |             |   |             |             |             |                                                                                                                                                                                                                                                                                                                                                                                                                                                                                                                                                                                                                                                                                                                                                                                                                                                                                                                                                                                                                                                                                                                                                                                                                                                                                                                                                                                                                                                                                                                                                                                                                                                                                                                                                                           |            |             |             |            |            |             |             |            |            |            |            |             |            |             |             |             |            |             |             |             |            |             |             |            |            |             |             |            |            |             |            |            |            |             |             |            |            |            |            |            |            |            |            |                                                                                                                                                                                                                                                                                                                                                                                                                                                                                                                                                                                                                                                                                                                                                                                                                                                                                                                                                                                                                                                                                                                                                                                                                                                                                                                                                                                                                                                                                                                                                                                                                                                                                                                                                                                                                                                                                                                                                                                                                                                                                                                                                                                                                                                                                                                                                                                                                                                                                                                                                                                                                                                                            |   |            |             |             |   |            |             |             |   |            |             |            |   |            |             |            |   |            |             |            |   |            |             |             |   |             |             |             |   |             |             |             |   |             |             |             |   |             |             |             |                                                                                                                                                                                                                                                                                                                                                                                                                                                                                                                                                                                                                                                                                                                                                                                                                                                                                                                                                                                                                                                                                                                                                                                                                                                                                                                                                                                                                                                                                                                                                                                                                                                                                                                                                                            |            |             |             |            |            |             |             |            |            |             |             |             |            |            |            |             |            |             |             |             |            |             |             |            |             |             |             |            |             |             |             |            |             |            |            |            |             |            |            |            |            |            |             |             |             |             |             |             |             |             |             |             |             |             |             |            |             |             |             |            |             |             |             |            |             |             |             |            |             |             |             |             |             |             |             |             |             |             |            |             |             |             |             |             |             |             |             |                                                                                                                                                                                                                                                                                                                                                                                                                                                                                                                                                                                                                                                                                                                                                                                                                                                                                                                                                                                                                                                                                                                                                                                                                                                                                                                                                                                                                                                                                                                                                                                                                                                                                                                                                                                                                                                                                                                                                                                                                                                                                                                                                                                                                                                                                                                                                                                                                                                                                                                                                                                                                                                                         |   |            |             |            |   |            |            |            |   |            |             |            |   |            |            |            |   |            |            |            |   |            |            |             |   |            |            |             |   |            |             |             |   |            |            |             |   |            |             |            |   |            |             |            |   |            |             |             |   |            |             |             |   |            |             |            |   |            |             |            |   |            |             |             |   |             |            |            |   |             |            |            |   |             |            |             |   |             |            |             |   |            |            |            |   |             |             |            |   |             |            |            |   |             |             |             |   |             |             |            |   |             |            |            |   |             |             |             |   |             |             |             |   |             |             |             |   |             |            |            |   |             |             |             |   |             |             |             |

|                   |                                                                                                                                                                                                                                                                                                                                                                                                                                                                                                                                                                                                                                                                                                                                                                           |                                                                                                                                                                                                                                                                                                                                                                                                                                                                                                                                                                                                                                                                                                                                                                                                                                                                                                    |                                                                                                                                                                                                                                                                                                                                                                                                                                                                                                                                                                                                                                                                                                                                                                                                                                                                                                   |
|-------------------|---------------------------------------------------------------------------------------------------------------------------------------------------------------------------------------------------------------------------------------------------------------------------------------------------------------------------------------------------------------------------------------------------------------------------------------------------------------------------------------------------------------------------------------------------------------------------------------------------------------------------------------------------------------------------------------------------------------------------------------------------------------------------|----------------------------------------------------------------------------------------------------------------------------------------------------------------------------------------------------------------------------------------------------------------------------------------------------------------------------------------------------------------------------------------------------------------------------------------------------------------------------------------------------------------------------------------------------------------------------------------------------------------------------------------------------------------------------------------------------------------------------------------------------------------------------------------------------------------------------------------------------------------------------------------------------|---------------------------------------------------------------------------------------------------------------------------------------------------------------------------------------------------------------------------------------------------------------------------------------------------------------------------------------------------------------------------------------------------------------------------------------------------------------------------------------------------------------------------------------------------------------------------------------------------------------------------------------------------------------------------------------------------------------------------------------------------------------------------------------------------------------------------------------------------------------------------------------------------|
|                   | <p>C 1.2434000 0.9055890 0.00010300<br/>H 1.7915540 1.8408880 0.00002500</p>                                                                                                                                                                                                                                                                                                                                                                                                                                                                                                                                                                                                                                                                                              |                                                                                                                                                                                                                                                                                                                                                                                                                                                                                                                                                                                                                                                                                                                                                                                                                                                                                                    |                                                                                                                                                                                                                                                                                                                                                                                                                                                                                                                                                                                                                                                                                                                                                                                                                                                                                                   |
| 23 C <sub>3</sub> |                                                                                                                                                                                                                                                                                                                                                                                                                                                                                                                                                                                                                                                                                                                                                                           |                                                                                                                                                                                                                                                                                                                                                                                                                                                                                                                                                                                                                                                                                                                                                                                                                                                                                                    |                                                                                                                                                                                                                                                                                                                                                                                                                                                                                                                                                                                                                                                                                                                                                                                                                                                                                                   |
|                   | <p>-1 1<br/>C -0.25265300 0.33182800 -0.00022300<br/>O -0.33848900 1.55447800 -0.00003100<br/>O -1.40373500 -0.42570600 -0.00019800<br/>C -2.63592900 0.28155200 0.00006500<br/>H -2.69371800 0.92627600 0.88082900<br/>H -2.69406300 0.92634400 -0.88062900<br/>C 2.23733800 -0.06290600 -0.00002200<br/>O 2.65097100 1.11570500 0.00019700<br/>C 3.30111700 -1.15787100 0.00016800<br/>H 3.93810600 -1.03634300 -0.87903400<br/>H 3.93729000 -1.03683800 0.88003100<br/>H 2.88770500 -2.16651400 -0.00027800<br/>C -3.75551400 -0.73383900 0.00023800<br/>H -3.70551700 -1.36935500 0.88576700<br/>H -4.71890600 -0.22155300 0.00049400<br/>H -3.70557400 -1.36922000 -0.88541100<br/>O 0.90059300 -0.49945900 -0.00042300<br/>H 0.71464300 -1.56444300 -0.00044500</p> | <p>-1 1<br/>C -0.59422800 0.46069000 0.26898400<br/>O -0.65798400 1.14146900 1.26202700<br/>O -1.66402300 -0.03674500 -0.34970600<br/>C -2.94642500 0.24489300 0.23509700<br/>H -2.95507200 -0.13470000 1.25778400<br/>H -3.08424600 1.32635600 0.27251000<br/>C 1.14441500 -1.30840100 0.11648200<br/>O 0.72508700 -1.76888500 1.15428000<br/>C 2.13242500 -2.04337000 -0.74381800<br/>H 2.89530600 -1.36462900 -1.12292900<br/>H 2.59025500 -2.85756000 -0.18646900<br/>H 1.59614000 -2.45373200 -1.60408600<br/>C -3.99707800 -0.42199700 -0.61670300<br/>H -3.84608400 -1.50152100 -0.64767100<br/>H -4.98320700 -0.22500000 -0.19497700<br/>H -3.97591200 -0.03509400 -1.63601400<br/>O 0.68029800 0.03441900 -0.41803800<br/>H 0.48512500 -0.06790200 -1.48640600<br/>C 1.79451700 1.12672000 -0.23570900<br/>O 1.62022100 2.16656000 -0.89261000<br/>O 2.72596700 0.84210800 0.53913600</p> | <p>-1 1<br/>C -0.61037900 -0.64149900 0.18989800<br/>O -0.74599800 -1.28639200 1.21247000<br/>O -1.69578500 -0.13603600 -0.46185800<br/>C -2.97045200 -0.37874500 0.12927800<br/>H -3.14824800 -1.45509100 0.18423100<br/>H -2.97781300 0.01049700 1.14959600<br/>C 1.87652300 -0.89597600 -0.27123500<br/>O 2.18951900 -1.58237800 0.70306000<br/>C 2.91045300 -0.65870600 -1.36142000<br/>H 2.78798200 0.31327800 -1.83971100<br/>H 3.91355400 -0.74516500 -0.94560000<br/>H 2.79134400 -1.42563700 -2.13144900<br/>C -4.01414700 0.30347300 -0.72293300<br/>H -4.00811600 -0.09291000 -1.73924800<br/>H -5.00363500 0.13585100 -0.29538900<br/>H -3.83757000 1.37904500 -0.76784400<br/>O 0.60678400 -0.26046800 -0.48853000<br/>H 0.45096800 0.14416100 -1.47859900<br/>C 1.05878400 1.66744500 0.43172700<br/>O 1.01913000 1.49012900 1.60068500<br/>O 1.21890300 2.38003100 -0.50144200</p> |
| 23 C <sub>4</sub> |                                                                                                                                                                                                                                                                                                                                                                                                                                                                                                                                                                                                                                                                                                                                                                           |                                                                                                                                                                                                                                                                                                                                                                                                                                                                                                                                                                                                                                                                                                                                                                                                                                                                                                    |                                                                                                                                                                                                                                                                                                                                                                                                                                                                                                                                                                                                                                                                                                                                                                                                                                                                                                   |
|                   | <p>-1 1<br/>C -0.24680200 1.00086500 -0.00004200<br/>O -0.79757900 2.10424200 -0.00014000<br/>O -1.00345400 -0.12755200 -0.00002800<br/>C -2.41580200 0.04844500 -0.00004200<br/>H -2.71733800 0.62051700 0.88056700<br/>H -2.71737600 0.62015700 -0.88087200<br/>C 1.90090400 -0.39321600 -0.00006100<br/>O 1.46575800 -1.56406300 -0.00040400<br/>C 3.42055200 -0.23669600 0.00025100<br/>H 3.82977000 -0.73944100 0.87965500<br/>H 3.83016300 -0.73898200 -0.87923100<br/>H 3.75354700 0.80115000 0.00057800<br/>C -3.05035800 -1.32304000 0.00023300<br/>H -2.75565200 -1.88824400 0.88564100<br/>H -4.13721800 -1.22686700 0.00024200<br/>H -2.75570000 -1.88856600 -0.88498600<br/>C 1.16345300 0.80480700 0.00011900<br/>H 1.72031400 1.73226700 0.00022900</p>    |                                                                                                                                                                                                                                                                                                                                                                                                                                                                                                                                                                                                                                                                                                                                                                                                                                                                                                    |                                                                                                                                                                                                                                                                                                                                                                                                                                                                                                                                                                                                                                                                                                                                                                                                                                                                                                   |
| 24 C <sub>1</sub> |                                                                                                                                                                                                                                                                                                                                                                                                                                                                                                                                                                                                                                                                                                                                                                           |                                                                                                                                                                                                                                                                                                                                                                                                                                                                                                                                                                                                                                                                                                                                                                                                                                                                                                    |                                                                                                                                                                                                                                                                                                                                                                                                                                                                                                                                                                                                                                                                                                                                                                                                                                                                                                   |
|                   | <p>-1 1<br/>C -1.25314500 -0.11205300 -0.00482900<br/>O -1.52852700 -1.30929000 -0.01691900<br/>O -2.28076200 0.81187600 0.00440500<br/>C -3.59389300 0.28751300 0.00478500<br/>H -4.26135000 1.14759100 0.01148200<br/>H -3.78703500 -0.31621800 -0.88423500<br/>H -3.78210100 -0.32559800 0.88852100<br/>C 1.25314700 -0.11205400 0.00479100<br/>O 1.52853100 -1.30928600 0.01692100<br/>O 2.28076000 0.81187900 -0.00435900<br/>C 3.59389200 0.28751200 -0.00474200<br/>H 4.26134600 1.14758400 -0.01236700<br/>H 3.78731700 -0.31544200 0.88476000<br/>H 3.78181000 -0.32637100 -0.88798500<br/>C -0.00000100 0.53738800 -0.00008600<br/>H 0.00000500 1.61718600 -0.00007300</p>                                                                                      | <p>-1 1<br/>C 1.36026300 -0.08445000 0.12463900<br/>O 1.81161600 0.29943600 1.17224300<br/>O 2.00110900 -0.92527000 -0.68728000<br/>C 3.28301700 -1.38012100 -0.24782400<br/>H 3.64270200 -2.04671700 -1.02599000<br/>H 3.96346000 -0.53819200 -0.12628300<br/>H 3.19343500 -1.91444700 0.69724300<br/>C -1.06107500 -0.60776100 0.11337000<br/>O -0.99839900 -1.22223900 1.14896600<br/>O -2.11249700 -0.64368900 -0.70144500<br/>C -3.23546300 -1.40531200 -0.25618400<br/>H -3.98525800 -1.30969400 -1.03594700<br/>H -2.95998700 -2.45094800 -0.12332300<br/>H -3.61538100 -1.00689600 0.68403400<br/>O 0.01039200 0.29955200 -0.43699700<br/>H 0.03355100 0.19380500 -1.51994700<br/>C -0.29593300 1.81074100 -0.11024500<br/>O -1.22314600 2.03428900 0.68492000<br/>O 0.44135200 2.61712200 -0.70119700</p>                                                                                 | <p>-1 1<br/>C 1.25169800 -0.63467900 0.05491500<br/>O 1.47781800 -1.13239900 1.14455400<br/>O 2.26957200 -0.40394100 -0.82468600<br/>C 3.57376400 -0.73609200 -0.37598800<br/>H 4.24525700 -0.47687800 -1.19143000<br/>H 3.84057900 -0.16906400 0.51710000<br/>H 3.65597200 -1.80113400 -0.15496700<br/>C -1.26460200 -0.64226400 -0.00477300<br/>O -1.52316300 -1.22297300 1.03322900<br/>O -2.25963900 -0.31024300 -0.87828300<br/>C -3.57858800 -0.65336300 -0.48353100<br/>H -4.23023300 -0.30166900 -1.28014500<br/>H -3.68845200 -1.73237600 -0.36646100<br/>H -3.84761600 -0.16764300 0.45559500<br/>O 0.00401300 -0.16961100 -0.48808200<br/>H 0.02605300 0.09685000 -1.53377500<br/>O 0.01467300 1.89647500 0.27509200<br/>O -0.35108300 1.82496800 1.39689300<br/>O 0.38557900 2.51822700 -0.66067100</p>                                                                               |



|                   |                                                                                                                                                                                                                                                                                                                                                                                                                                                                                                                                                                                                                                                                                                                                                                                                                                   |                                                                                                                                                                                                                                                                                                                                                                                                                                                                                                                                                                                                                                                                                                                                                                                                                                                                                                                                                           |                                                                                                                                                                                                                                                                                                                                                                                                                                                                                                                                                                                                                                                                                                                                                                                                                                                                                                                                                                  |
|-------------------|-----------------------------------------------------------------------------------------------------------------------------------------------------------------------------------------------------------------------------------------------------------------------------------------------------------------------------------------------------------------------------------------------------------------------------------------------------------------------------------------------------------------------------------------------------------------------------------------------------------------------------------------------------------------------------------------------------------------------------------------------------------------------------------------------------------------------------------|-----------------------------------------------------------------------------------------------------------------------------------------------------------------------------------------------------------------------------------------------------------------------------------------------------------------------------------------------------------------------------------------------------------------------------------------------------------------------------------------------------------------------------------------------------------------------------------------------------------------------------------------------------------------------------------------------------------------------------------------------------------------------------------------------------------------------------------------------------------------------------------------------------------------------------------------------------------|------------------------------------------------------------------------------------------------------------------------------------------------------------------------------------------------------------------------------------------------------------------------------------------------------------------------------------------------------------------------------------------------------------------------------------------------------------------------------------------------------------------------------------------------------------------------------------------------------------------------------------------------------------------------------------------------------------------------------------------------------------------------------------------------------------------------------------------------------------------------------------------------------------------------------------------------------------------|
|                   | <p>H 2.88255000 1.91100200 0.43403000<br/> H 1.68140000 2.11900600 -0.84578500<br/> H 1.18560600 2.10094800 0.85702800<br/> N 1.74134900 0.21709400 0.10506100<br/> C 2.96736600 -0.50695300 -0.13631500<br/> H 3.70068300 -0.29473100 0.64687300<br/> H 2.75370400 -1.57105600 -0.14200000<br/> H 3.41358300 -0.23045300 -1.09995500<br/> C -0.65747100 0.37975800 -0.05031500<br/> H -0.52314900 1.44355700 -0.16590700</p>                                                                                                                                                                                                                                                                                                                                                                                                     | <p>H 1.27700700 1.27542400 -1.54235200<br/> H 2.57839000 1.69863100 -0.42837300<br/> H 2.89991900 0.64329300 -1.81686600<br/> N 1.88316500 -0.27386300 -0.24741100<br/> C 3.04773800 -0.90360200 0.34283500<br/> H 3.44677100 -0.30006100 1.16396700<br/> H 2.78059800 -1.88372200 0.72503100<br/> H 3.82164600 -1.00828400 -0.41812000<br/> C -0.54298200 0.10572200 -0.39210600<br/> H -0.45598600 0.16367000 -1.47879000<br/> C -0.67728100 1.55553800 0.17178300<br/> O -1.30775200 2.34909300 -0.55273400<br/> O -0.14952700 1.77682600 1.27762600</p>                                                                                                                                                                                                                                                                                                                                                                                               | <p>H -1.22893100 1.75774700 1.15480500<br/> H -2.96327000 1.51592000 1.30204100<br/> H -1.86514300 0.58474600 2.32491200<br/> N -1.99522400 -0.00558900 0.28793300<br/> C -3.29528700 -0.47973000 -0.13051400<br/> H -3.90051900 0.34944700 -0.50559600<br/> H -3.16825900 -1.21288500 -0.92043100<br/> H -3.83457600 -0.94575800 0.70198500<br/> C 0.39862700 -0.23683000 0.46749700<br/> H 0.32092300 0.33990700 1.37569400<br/> C 0.96294400 1.51638300 -0.79447700<br/> O 1.26035500 2.33259900 0.00886700<br/> O 0.80110500 1.15806700 -1.90738700</p>                                                                                                                                                                                                                                                                                                                                                                                                      |
| 25 C <sub>3</sub> | 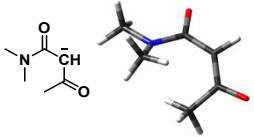                                                                                                                                                                                                                                                                                                                                                                                                                                                                                                                                                                                                                                                                                                                                                 |                                                                                                                                                                                                                                                                                                                                                                                                                                                                                                                                                                                                                                                                                                                                                                                                                                                                                                                                                           |                                                                                                                                                                                                                                                                                                                                                                                                                                                                                                                                                                                                                                                                                                                                                                                                                                                                                                                                                                  |
|                   | <p>-11<br/> C 0.61946400 0.87074600 -0.04398400<br/> O 1.29322300 1.89682200 0.17590500<br/> C -1.84663500 0.09610000 0.02336500<br/> O -3.04827200 0.34640300 -0.26465100<br/> C -1.61709300 -1.16559100 0.84419500<br/> H -0.62592500 -1.22606700 1.28931400<br/> H -2.37152900 -1.19386400 1.63174700<br/> H -1.76909800 -2.04739300 0.21652700<br/> C 0.91273800 -1.45031900 -0.89293400<br/> H 1.68725300 -1.59110600 -1.65658100<br/> H 0.81424700 -2.38610300 -0.33565900<br/> H -0.02873200 -1.24194700 -1.39186800<br/> N 1.27033500 -0.35178300 -0.02199500<br/> C 2.64414000 -0.38332000 0.42538000<br/> H 3.34834100 -0.12242400 -0.37489800<br/> H 2.78740100 0.31635900 1.24454700<br/> H 2.88049100 -1.39189600 0.77070900<br/> C -0.79263000 0.94734800 -0.32399900<br/> H -1.09429500 1.91134200 -0.72205100</p> |                                                                                                                                                                                                                                                                                                                                                                                                                                                                                                                                                                                                                                                                                                                                                                                                                                                                                                                                                           |                                                                                                                                                                                                                                                                                                                                                                                                                                                                                                                                                                                                                                                                                                                                                                                                                                                                                                                                                                  |
| 25 C <sub>4</sub> |                                                                                                                                                                                                                                                                                                                                                                                                                                                                                                                                                                                                                                                                                                                                                 |                                                                                                                                                                                                                                                                                                                                                                                                                                                                                                                                                                                                                                                                                                                                                                                                                                                                                                                                                           |                                                                                                                                                                                                                                                                                                                                                                                                                                                                                                                                                                                                                                                                                                                                                                                                                                                                                                                                                                  |
|                   | <p>-11<br/> C 0.65003500 0.83721000 0.06898800<br/> O 1.25922700 1.91830400 -0.06616300<br/> C -1.73159900 -0.10342600 -0.13638600<br/> O -1.53153300 -1.18128100 -0.75247100<br/> C -3.19077300 0.25130700 0.13929800<br/> H -3.73220500 0.31565100 -0.80777200<br/> H -3.64931500 -0.55395700 0.71851900<br/> H -3.31607600 1.18911600 0.68113400<br/> C 0.99920100 -1.54082700 0.68460300<br/> H 1.04129700 -2.40887100 0.02261500<br/> H 1.69393800 -1.71145100 1.51717500<br/> H -0.00880900 -1.45866400 1.07205300<br/> N 1.36778400 -0.33336300 -0.01940800<br/> C 2.76847100 -0.25512800 -0.36550000<br/> H 3.08407400 -1.21621400 -0.77627700<br/> H 2.93052300 0.52064600 -1.10917600<br/> H 3.40000600 -0.03243300 0.50421700<br/> C -0.77714700 0.81592300 0.30647400<br/> H -1.14860100 1.76318000 0.67758100</p>    |                                                                                                                                                                                                                                                                                                                                                                                                                                                                                                                                                                                                                                                                                                                                                                                                                                                                                                                                                           |                                                                                                                                                                                                                                                                                                                                                                                                                                                                                                                                                                                                                                                                                                                                                                                                                                                                                                                                                                  |
| 26                |                                                                                                                                                                                                                                                                                                                                                                                                                                                                                                                                                                                                                                                                                                                                                |                                                                                                                                                                                                                                                                                                                                                                                                                                                                                                                                                                                                                                                                                                                                                                                                                                                                        |                                                                                                                                                                                                                                                                                                                                                                                                                                                                                                                                                                                                                                                                                                                                                                                                                                                                             |
|                   | <p>-11<br/> C -0.74038700 0.40934800 0.04932400<br/> O -1.08051000 1.61240400 0.12660200<br/> C -3.02340800 -0.43612200 -0.05594800<br/> N -4.17484600 -0.25226200 -0.05849400<br/> C 1.61902100 1.13971600 0.05373400<br/> C 1.15909700 -1.23391500 -0.00100900<br/> C 2.88472600 0.38585500 -0.34505500<br/> H 1.72793300 1.59685200 1.04457900<br/> H 1.36066400 1.93538700 -0.64506300<br/> C 2.65137200 -1.00892900 0.23185100<br/> H 0.97702800 -1.69538200 -0.97986500<br/> H 0.72036800 -1.88588400 0.75784600<br/> H 2.95678800 0.33146400 -1.43389900<br/> H 3.78999300 0.86118600 0.03049900<br/> H 3.26499300 -1.77927000 -0.23336700<br/> H 2.86296400 -1.00896300 1.30359600<br/> N 0.59736800 0.10488900 0.06148800<br/> C -1.65735200 -0.67634800 -0.05414300<br/> H -1.33271300 -1.70063300 -0.15061900</p>      | <p>-11<br/> C -0.11170700 -0.75561800 -0.29037500<br/> O -0.32849300 -1.62594300 -1.12852200<br/> C -2.34994600 -1.02003300 0.64488500<br/> N -3.20806400 -1.76303700 0.81842500<br/> C 2.28920500 -0.91528300 -0.64628700<br/> C 1.47835100 0.74533500 0.93181300<br/> C 3.46287100 -0.32582100 0.12707600<br/> H 2.30091300 -0.60520400 -1.69528100<br/> H 2.25437800 -2.00358300 -0.61901000<br/> C 2.93314100 1.03507900 0.57407400<br/> H 1.38640100 0.42387400 1.97334400<br/> H 0.83423800 1.60670100 0.76503800<br/> H 3.68612500 -0.94663800 0.99723800<br/> H 4.36290000 -0.25757200 -0.48117100<br/> H 3.48325200 1.45980500 1.41175400<br/> H 2.97428800 1.74340500 -0.25580100<br/> N 1.12157200 -0.35030900 0.02690900<br/> C -1.26546300 -0.07639300 0.43849000<br/> H -0.95851600 0.27854900 1.42448900<br/> C -1.77951300 1.22706800 -0.33274800<br/> O -2.92697100 1.58466000 -0.04073700<br/> O -0.95205700 1.74229300 -1.09567900</p> | <p>-11<br/> C 0.09592200 -0.93604500 0.14071600<br/> O 0.24519000 -1.82232700 0.99853500<br/> C 2.40294900 -1.09242400 -0.62101500<br/> N 3.42549100 -1.63938500 -0.61277700<br/> C -2.29940900 -0.85734600 0.67058900<br/> C -1.44577800 0.69044800 -0.98541400<br/> C -3.46576000 -0.20444800 -0.06374300<br/> H -2.24377300 -0.51838300 1.71099200<br/> H -2.35534500 -1.94545600 0.68147900<br/> C -2.86050700 1.09874900 -0.58149700<br/> H -1.41224300 0.35805200 -2.02882400<br/> H -0.73551700 1.51060700 -0.87095200<br/> H -3.77598900 -0.83238800 -0.90201600<br/> H -4.32893400 -0.05061100 0.58198600<br/> H -3.41646500 1.53629600 -1.40924200<br/> H -2.81586900 1.83476000 0.22418300<br/> N -1.13474600 -0.40731900 -0.07903400<br/> C 1.19561600 -0.37560000 -0.62373800<br/> H 0.98093600 0.13210700 -1.55515100<br/> C 1.78519300 1.51683200 0.49304700<br/> O 2.67610300 1.91816700 -0.16633900<br/> O 1.03103500 1.56177900 1.39737300</p> |



|                                                                                                                                                                                                                                                                                                                                                                                                                                                                                                                                                                                                                                                                                                                                                                                                                                                                                                                                                                                                                                                                                                                                                                                                                                                                                                                                                                                                                                                                                                                                                                                                                                                                                                                                                                                                                                                                                                                                                                                                                                                                                                                                                                                                                                                                                                                                                 |             |                                                                                    |                                                                                      |             |   |            |            |             |   |            |             |             |   |            |             |             |   |            |             |             |   |            |             |             |   |            |            |             |   |            |             |             |   |            |             |            |   |            |             |             |   |            |            |             |   |            |             |             |   |            |             |             |   |             |             |             |   |             |             |             |   |             |             |            |   |             |             |             |   |             |             |             |   |             |             |             |   |             |             |             |   |             |             |            |   |             |             |             |   |             |            |             |   |             |             |             |   |             |            |             |   |             |            |             |   |             |             |             |                                                                                                                                                                                                                                                                                                                                                                                                                                                                                                                                                                                                                                                                                                                                                                                                                                                                                                                                                                                                                                                                                                                                                                                                                                                                                                                                                                                                                                                                                                                                                                                                                                                                                                                                                                                                                                                                                                                                                                                                                                                                                                                                                                                                                                                                                                                                                                                                                                                                                                                     |            |             |            |                                                                                                                                                                                                                                                                                                                                                                                                                                                                                                                                                                                                                                                                                                                                                                                                                                                                                                                                                                                                                                                                                                                                                                                                                                                                                                                                                                                                                                                                                                                                                                                                                                                                                                                                                                                                                                                                                                                                                                                                                                                                                                                                                                                                                                                                                                                                                                                                                                                                                                                                                                                               |   |            |             |             |   |            |             |             |   |            |             |             |   |            |             |             |   |            |             |             |   |            |             |             |   |            |             |            |   |            |             |            |   |            |             |             |   |            |             |             |   |            |             |             |   |             |             |             |   |             |             |             |   |             |             |             |   |             |            |             |   |             |             |             |   |             |             |             |   |             |             |             |   |             |            |             |   |             |             |             |   |             |             |             |   |             |             |             |   |             |             |             |   |             |            |             |   |             |             |             |   |             |             |            |   |             |            |             |   |             |             |             |   |             |            |            |                                                                                                                                                                                                                                                                                                                                                                                                                                                                                                                                                                                                                                                                                                                                                                                                                                                                                                                                                                                                                                                                                                                                                                                                                                                                                                                                                                                                                                                                                                                                                                                                                                                                                                                                                                                                                                                                                                                                                                                                                                                                                                                                                                                                                                                                                                                                                                                                                                                                                                                        |            |            |            |             |            |            |            |                                                                                                                                                                                                                                                                                                                                                                                                                                                                                                                                                                                                                                                                                                                                                                                                                                                                                                                                                                                                                                                                                                                                                                                                                                                                                                                                                                                                                                                                                                                                                                                                                                                                                                                                                                                                                                                                                                                                                                                                                                                                                                                                                                                                                                                                                                                                                                                                                                                                                                                                                                                             |   |            |             |             |   |            |             |             |   |            |             |             |   |            |             |             |   |            |             |             |   |            |             |             |   |            |             |            |   |            |             |            |   |            |            |             |   |            |             |             |   |            |             |             |   |             |             |             |   |             |             |             |   |             |            |             |   |             |             |             |   |             |             |             |   |             |            |             |   |             |             |             |   |             |             |             |   |             |             |             |   |             |             |             |   |             |             |             |   |             |             |             |   |             |            |             |   |             |             |             |   |             |             |            |   |             |             |             |   |             |            |             |   |            |            |            |   |            |            |            |   |            |            |            |
|-------------------------------------------------------------------------------------------------------------------------------------------------------------------------------------------------------------------------------------------------------------------------------------------------------------------------------------------------------------------------------------------------------------------------------------------------------------------------------------------------------------------------------------------------------------------------------------------------------------------------------------------------------------------------------------------------------------------------------------------------------------------------------------------------------------------------------------------------------------------------------------------------------------------------------------------------------------------------------------------------------------------------------------------------------------------------------------------------------------------------------------------------------------------------------------------------------------------------------------------------------------------------------------------------------------------------------------------------------------------------------------------------------------------------------------------------------------------------------------------------------------------------------------------------------------------------------------------------------------------------------------------------------------------------------------------------------------------------------------------------------------------------------------------------------------------------------------------------------------------------------------------------------------------------------------------------------------------------------------------------------------------------------------------------------------------------------------------------------------------------------------------------------------------------------------------------------------------------------------------------------------------------------------------------------------------------------------------------|-------------|------------------------------------------------------------------------------------|--------------------------------------------------------------------------------------|-------------|---|------------|------------|-------------|---|------------|-------------|-------------|---|------------|-------------|-------------|---|------------|-------------|-------------|---|------------|-------------|-------------|---|------------|------------|-------------|---|------------|-------------|-------------|---|------------|-------------|------------|---|------------|-------------|-------------|---|------------|------------|-------------|---|------------|-------------|-------------|---|------------|-------------|-------------|---|-------------|-------------|-------------|---|-------------|-------------|-------------|---|-------------|-------------|------------|---|-------------|-------------|-------------|---|-------------|-------------|-------------|---|-------------|-------------|-------------|---|-------------|-------------|-------------|---|-------------|-------------|------------|---|-------------|-------------|-------------|---|-------------|------------|-------------|---|-------------|-------------|-------------|---|-------------|------------|-------------|---|-------------|------------|-------------|---|-------------|-------------|-------------|---------------------------------------------------------------------------------------------------------------------------------------------------------------------------------------------------------------------------------------------------------------------------------------------------------------------------------------------------------------------------------------------------------------------------------------------------------------------------------------------------------------------------------------------------------------------------------------------------------------------------------------------------------------------------------------------------------------------------------------------------------------------------------------------------------------------------------------------------------------------------------------------------------------------------------------------------------------------------------------------------------------------------------------------------------------------------------------------------------------------------------------------------------------------------------------------------------------------------------------------------------------------------------------------------------------------------------------------------------------------------------------------------------------------------------------------------------------------------------------------------------------------------------------------------------------------------------------------------------------------------------------------------------------------------------------------------------------------------------------------------------------------------------------------------------------------------------------------------------------------------------------------------------------------------------------------------------------------------------------------------------------------------------------------------------------------------------------------------------------------------------------------------------------------------------------------------------------------------------------------------------------------------------------------------------------------------------------------------------------------------------------------------------------------------------------------------------------------------------------------------------------------|------------|-------------|------------|-----------------------------------------------------------------------------------------------------------------------------------------------------------------------------------------------------------------------------------------------------------------------------------------------------------------------------------------------------------------------------------------------------------------------------------------------------------------------------------------------------------------------------------------------------------------------------------------------------------------------------------------------------------------------------------------------------------------------------------------------------------------------------------------------------------------------------------------------------------------------------------------------------------------------------------------------------------------------------------------------------------------------------------------------------------------------------------------------------------------------------------------------------------------------------------------------------------------------------------------------------------------------------------------------------------------------------------------------------------------------------------------------------------------------------------------------------------------------------------------------------------------------------------------------------------------------------------------------------------------------------------------------------------------------------------------------------------------------------------------------------------------------------------------------------------------------------------------------------------------------------------------------------------------------------------------------------------------------------------------------------------------------------------------------------------------------------------------------------------------------------------------------------------------------------------------------------------------------------------------------------------------------------------------------------------------------------------------------------------------------------------------------------------------------------------------------------------------------------------------------------------------------------------------------------------------------------------------------|---|------------|-------------|-------------|---|------------|-------------|-------------|---|------------|-------------|-------------|---|------------|-------------|-------------|---|------------|-------------|-------------|---|------------|-------------|-------------|---|------------|-------------|------------|---|------------|-------------|------------|---|------------|-------------|-------------|---|------------|-------------|-------------|---|------------|-------------|-------------|---|-------------|-------------|-------------|---|-------------|-------------|-------------|---|-------------|-------------|-------------|---|-------------|------------|-------------|---|-------------|-------------|-------------|---|-------------|-------------|-------------|---|-------------|-------------|-------------|---|-------------|------------|-------------|---|-------------|-------------|-------------|---|-------------|-------------|-------------|---|-------------|-------------|-------------|---|-------------|-------------|-------------|---|-------------|------------|-------------|---|-------------|-------------|-------------|---|-------------|-------------|------------|---|-------------|------------|-------------|---|-------------|-------------|-------------|---|-------------|------------|------------|------------------------------------------------------------------------------------------------------------------------------------------------------------------------------------------------------------------------------------------------------------------------------------------------------------------------------------------------------------------------------------------------------------------------------------------------------------------------------------------------------------------------------------------------------------------------------------------------------------------------------------------------------------------------------------------------------------------------------------------------------------------------------------------------------------------------------------------------------------------------------------------------------------------------------------------------------------------------------------------------------------------------------------------------------------------------------------------------------------------------------------------------------------------------------------------------------------------------------------------------------------------------------------------------------------------------------------------------------------------------------------------------------------------------------------------------------------------------------------------------------------------------------------------------------------------------------------------------------------------------------------------------------------------------------------------------------------------------------------------------------------------------------------------------------------------------------------------------------------------------------------------------------------------------------------------------------------------------------------------------------------------------------------------------------------------------------------------------------------------------------------------------------------------------------------------------------------------------------------------------------------------------------------------------------------------------------------------------------------------------------------------------------------------------------------------------------------------------------------------------------------------------|------------|------------|------------|-------------|------------|------------|------------|---------------------------------------------------------------------------------------------------------------------------------------------------------------------------------------------------------------------------------------------------------------------------------------------------------------------------------------------------------------------------------------------------------------------------------------------------------------------------------------------------------------------------------------------------------------------------------------------------------------------------------------------------------------------------------------------------------------------------------------------------------------------------------------------------------------------------------------------------------------------------------------------------------------------------------------------------------------------------------------------------------------------------------------------------------------------------------------------------------------------------------------------------------------------------------------------------------------------------------------------------------------------------------------------------------------------------------------------------------------------------------------------------------------------------------------------------------------------------------------------------------------------------------------------------------------------------------------------------------------------------------------------------------------------------------------------------------------------------------------------------------------------------------------------------------------------------------------------------------------------------------------------------------------------------------------------------------------------------------------------------------------------------------------------------------------------------------------------------------------------------------------------------------------------------------------------------------------------------------------------------------------------------------------------------------------------------------------------------------------------------------------------------------------------------------------------------------------------------------------------------------------------------------------------------------------------------------------------|---|------------|-------------|-------------|---|------------|-------------|-------------|---|------------|-------------|-------------|---|------------|-------------|-------------|---|------------|-------------|-------------|---|------------|-------------|-------------|---|------------|-------------|------------|---|------------|-------------|------------|---|------------|------------|-------------|---|------------|-------------|-------------|---|------------|-------------|-------------|---|-------------|-------------|-------------|---|-------------|-------------|-------------|---|-------------|------------|-------------|---|-------------|-------------|-------------|---|-------------|-------------|-------------|---|-------------|------------|-------------|---|-------------|-------------|-------------|---|-------------|-------------|-------------|---|-------------|-------------|-------------|---|-------------|-------------|-------------|---|-------------|-------------|-------------|---|-------------|-------------|-------------|---|-------------|------------|-------------|---|-------------|-------------|-------------|---|-------------|-------------|------------|---|-------------|-------------|-------------|---|-------------|------------|-------------|---|------------|------------|------------|---|------------|------------|------------|---|------------|------------|------------|
| <p>27</p> 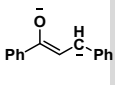                                                                                                                                                                                                                                                                                                                                                                                                                                                                                                                                                                                                                                                                                                                                                                                                                                                                                                                                                                                                                                                                                                                                                                                                                                                                                                                                                                                                                                                                                                                                                                                                                                                                                                                                                                                                                                                                                                                                                                                                                                                                                                                                                                                                                                                     |             |   |   |             |   |            |            |             |   |            |             |             |   |            |             |             |   |            |             |             |   |            |             |             |   |            |            |             |   |            |             |             |   |            |             |            |   |            |             |             |   |            |            |             |   |            |             |             |   |            |             |             |   |             |             |             |   |             |             |             |   |             |             |            |   |             |             |             |   |             |             |             |   |             |             |             |   |             |             |             |   |             |             |            |   |             |             |             |   |             |            |             |   |             |             |             |   |             |            |             |   |             |            |             |   |             |             |             |                                                                                                                                                                                                                                                                                                                                                                                                                                                                                                                                                                                                                                                                                                                                                                                                                                                                                                                                                                                                                                                                                                                                                                                                                                                                                                                                                                                                                                                                                                                                                                                                                                                                                                                                                                                                                                                                                                                                                                                                                                                                                                                                                                                                                                                                                                                                                                                                                                                                                                                     |            |             |            |                                                                                                                                                                                                                                                                                                                                                                                                                                                                                                                                                                                                                                                                                                                                                                                                                                                                                                                                                                                                                                                                                                                                                                                                                                                                                                                                                                                                                                                                                                                                                                                                                                                                                                                                                                                                                                                                                                                                                                                                                                                                                                                                                                                                                                                                                                                                                                                                                                                                                                                                                                                               |   |            |             |             |   |            |             |             |   |            |             |             |   |            |             |             |   |            |             |             |   |            |             |             |   |            |             |            |   |            |             |            |   |            |             |             |   |            |             |             |   |            |             |             |   |             |             |             |   |             |             |             |   |             |             |             |   |             |            |             |   |             |             |             |   |             |             |             |   |             |             |             |   |             |            |             |   |             |             |             |   |             |             |             |   |             |             |             |   |             |             |             |   |             |            |             |   |             |             |             |   |             |             |            |   |             |            |             |   |             |             |             |   |             |            |            |                                                                                                                                                                                                                                                                                                                                                                                                                                                                                                                                                                                                                                                                                                                                                                                                                                                                                                                                                                                                                                                                                                                                                                                                                                                                                                                                                                                                                                                                                                                                                                                                                                                                                                                                                                                                                                                                                                                                                                                                                                                                                                                                                                                                                                                                                                                                                                                                                                                                                                                        |            |            |            |             |            |            |            |                                                                                                                                                                                                                                                                                                                                                                                                                                                                                                                                                                                                                                                                                                                                                                                                                                                                                                                                                                                                                                                                                                                                                                                                                                                                                                                                                                                                                                                                                                                                                                                                                                                                                                                                                                                                                                                                                                                                                                                                                                                                                                                                                                                                                                                                                                                                                                                                                                                                                                                                                                                             |   |            |             |             |   |            |             |             |   |            |             |             |   |            |             |             |   |            |             |             |   |            |             |             |   |            |             |            |   |            |             |            |   |            |            |             |   |            |             |             |   |            |             |             |   |             |             |             |   |             |             |             |   |             |            |             |   |             |             |             |   |             |             |             |   |             |            |             |   |             |             |             |   |             |             |             |   |             |             |             |   |             |             |             |   |             |             |             |   |             |             |             |   |             |            |             |   |             |             |             |   |             |             |            |   |             |             |             |   |             |            |             |   |            |            |            |   |            |            |            |   |            |            |            |
| <p>-2 1</p> <table border="1"> <tbody> <tr><td>C</td><td>3.96729700</td><td>1.69394500</td><td>-0.08322800</td></tr> <tr><td>C</td><td>2.72478400</td><td>1.09441500</td><td>-0.04667200</td></tr> <tr><td>C</td><td>2.56060600</td><td>-0.33872500</td><td>0.00587900</td></tr> <tr><td>C</td><td>3.80846700</td><td>-1.06286800</td><td>0.01379700</td></tr> <tr><td>C</td><td>5.03340900</td><td>-0.44179200</td><td>-0.02383000</td></tr> <tr><td>C</td><td>5.15455900</td><td>0.95677500</td><td>-0.07309400</td></tr> <tr><td>H</td><td>4.01671000</td><td>2.77927900</td><td>-0.12082700</td></tr> <tr><td>H</td><td>1.84528300</td><td>1.72815100</td><td>-0.05619500</td></tr> <tr><td>H</td><td>3.76649000</td><td>-2.14833300</td><td>0.05194900</td></tr> <tr><td>H</td><td>5.93032100</td><td>-1.05535800</td><td>-0.01462700</td></tr> <tr><td>H</td><td>6.12247000</td><td>1.44048900</td><td>-0.10180200</td></tr> <tr><td>C</td><td>0.03625100</td><td>-0.37521300</td><td>0.04746500</td></tr> <tr><td>C</td><td>0.01008100</td><td>0.70667700</td><td>-0.00533700</td></tr> <tr><td>C</td><td>-1.17541000</td><td>-1.03635700</td><td>0.08250400</td></tr> <tr><td>O</td><td>-3.70785000</td><td>-2.33229900</td><td>0.11500300</td></tr> <tr><td>C</td><td>-2.43464000</td><td>-0.23148300</td><td>0.03905100</td></tr> <tr><td>C</td><td>-3.65276900</td><td>-0.90236200</td><td>-0.15815000</td></tr> <tr><td>C</td><td>-2.51548200</td><td>1.16594700</td><td>0.19571000</td></tr> <tr><td>H</td><td>-4.86467400</td><td>-0.22811500</td><td>-0.21869400</td></tr> <tr><td>C</td><td>-3.61652300</td><td>-1.97845600</td><td>-0.26384900</td></tr> <tr><td>C</td><td>-3.72210100</td><td>1.83895500</td><td>0.13712600</td></tr> <tr><td>H</td><td>-1.61721500</td><td>1.74061200</td><td>0.38294400</td></tr> <tr><td>C</td><td>-4.91563100</td><td>1.15069600</td><td>-0.07499000</td></tr> <tr><td>H</td><td>-5.77987800</td><td>-0.78818600</td><td>-0.37887100</td></tr> <tr><td>H</td><td>-3.73615800</td><td>2.91562200</td><td>0.26640300</td></tr> <tr><td>H</td><td>-5.85953300</td><td>1.68012600</td><td>-0.11686000</td></tr> <tr><td>C</td><td>1.33251000</td><td>-0.99703800</td><td>0.04783800</td></tr> <tr><td>H</td><td>1.35769200</td><td>-2.08289900</td><td>0.09277200</td></tr> </tbody> </table> | C           | 3.96729700                                                                         | 1.69394500                                                                           | -0.08322800 | C | 2.72478400 | 1.09441500 | -0.04667200 | C | 2.56060600 | -0.33872500 | 0.00587900  | C | 3.80846700 | -1.06286800 | 0.01379700  | C | 5.03340900 | -0.44179200 | -0.02383000 | C | 5.15455900 | 0.95677500  | -0.07309400 | H | 4.01671000 | 2.77927900 | -0.12082700 | H | 1.84528300 | 1.72815100  | -0.05619500 | H | 3.76649000 | -2.14833300 | 0.05194900 | H | 5.93032100 | -1.05535800 | -0.01462700 | H | 6.12247000 | 1.44048900 | -0.10180200 | C | 0.03625100 | -0.37521300 | 0.04746500  | C | 0.01008100 | 0.70667700  | -0.00533700 | C | -1.17541000 | -1.03635700 | 0.08250400  | O | -3.70785000 | -2.33229900 | 0.11500300  | C | -2.43464000 | -0.23148300 | 0.03905100 | C | -3.65276900 | -0.90236200 | -0.15815000 | C | -2.51548200 | 1.16594700  | 0.19571000  | H | -4.86467400 | -0.22811500 | -0.21869400 | C | -3.61652300 | -1.97845600 | -0.26384900 | C | -3.72210100 | 1.83895500  | 0.13712600 | H | -1.61721500 | 1.74061200  | 0.38294400  | C | -4.91563100 | 1.15069600 | -0.07499000 | H | -5.77987800 | -0.78818600 | -0.37887100 | H | -3.73615800 | 2.91562200 | 0.26640300  | H | -5.85953300 | 1.68012600 | -0.11686000 | C | 1.33251000  | -0.99703800 | 0.04783800  | H                                                                                                                                                                                                                                                                                                                                                                                                                                                                                                                                                                                                                                                                                                                                                                                                                                                                                                                                                                                                                                                                                                                                                                                                                                                                                                                                                                                                                                                                                                                                                                                                                                                                                                                                                                                                                                                                                                                                                                                                                                                                                                                                                                                                                                                                                                                                                                                                                                                                                                                   | 1.35769200 | -2.08289900 | 0.09277200 | <p>-2 1</p> <table border="1"> <tbody> <tr><td>C</td><td>3.58918000</td><td>-1.80841800</td><td>1.00510300</td></tr> <tr><td>C</td><td>2.54957100</td><td>-0.89266300</td><td>0.96035500</td></tr> <tr><td>C</td><td>2.27542700</td><td>-0.16727700</td><td>-0.20058000</td></tr> <tr><td>C</td><td>3.08270400</td><td>-0.39272100</td><td>-1.31330100</td></tr> <tr><td>C</td><td>4.12546000</td><td>-1.31026900</td><td>-1.27519600</td></tr> <tr><td>C</td><td>4.38375300</td><td>-2.02376000</td><td>-0.11446600</td></tr> <tr><td>C</td><td>3.78257000</td><td>-2.35787100</td><td>1.91894600</td></tr> <tr><td>H</td><td>1.94103600</td><td>-0.72174500</td><td>1.83965400</td></tr> <tr><td>H</td><td>2.88883000</td><td>0.15847600</td><td>-2.22669700</td></tr> <tr><td>H</td><td>4.73617800</td><td>-1.46723100</td><td>-2.15642900</td></tr> <tr><td>H</td><td>5.19532000</td><td>-2.74011300</td><td>-0.08024500</td></tr> <tr><td>C</td><td>-0.19219000</td><td>0.18915000</td><td>-0.00489900</td></tr> <tr><td>H</td><td>-0.23895400</td><td>-0.62279200</td><td>0.70933500</td></tr> <tr><td>C</td><td>-1.33801000</td><td>0.64517800</td><td>-0.59768100</td></tr> <tr><td>O</td><td>-1.42702700</td><td>1.65022900</td><td>-1.39394000</td></tr> <tr><td>C</td><td>-2.63643000</td><td>-0.06291400</td><td>-0.26317300</td></tr> <tr><td>C</td><td>-3.83100700</td><td>0.65328400</td><td>-0.34175800</td></tr> <tr><td>C</td><td>-2.71286800</td><td>-1.40637200</td><td>0.11179000</td></tr> <tr><td>C</td><td>-5.04938000</td><td>0.06615800</td><td>-0.03140400</td></tr> <tr><td>H</td><td>-3.78333200</td><td>1.68893800</td><td>-0.65346100</td></tr> <tr><td>C</td><td>-3.92844700</td><td>-2.00125600</td><td>0.41691200</td></tr> <tr><td>H</td><td>-1.80820000</td><td>-2.00060200</td><td>1.04982100</td></tr> <tr><td>C</td><td>-5.10552400</td><td>-1.26668500</td><td>0.35239200</td></tr> <tr><td>H</td><td>-5.95998800</td><td>0.65114300</td><td>-0.09011100</td></tr> <tr><td>H</td><td>-3.95809900</td><td>-3.04742000</td><td>0.69844300</td></tr> <tr><td>H</td><td>-6.05096000</td><td>-1.73052600</td><td>0.58993100</td></tr> <tr><td>C</td><td>1.14186000</td><td>0.83405400</td><td>-0.24928200</td></tr> <tr><td>H</td><td>1.13115400</td><td>1.26728600</td><td>-1.25048300</td></tr> <tr><td>C</td><td>1.49993800</td><td>2.02144900</td><td>0.70584700</td></tr> <tr><td>O</td><td>1.15317300</td><td>1.94548900</td><td>1.90526600</td></tr> <tr><td>O</td><td>2.14940100</td><td>2.96188400</td><td>0.18709100</td></tr> </tbody> </table> | C | 3.58918000 | -1.80841800 | 1.00510300  | C | 2.54957100 | -0.89266300 | 0.96035500  | C | 2.27542700 | -0.16727700 | -0.20058000 | C | 3.08270400 | -0.39272100 | -1.31330100 | C | 4.12546000 | -1.31026900 | -1.27519600 | C | 4.38375300 | -2.02376000 | -0.11446600 | C | 3.78257000 | -2.35787100 | 1.91894600 | H | 1.94103600 | -0.72174500 | 1.83965400 | H | 2.88883000 | 0.15847600  | -2.22669700 | H | 4.73617800 | -1.46723100 | -2.15642900 | H | 5.19532000 | -2.74011300 | -0.08024500 | C | -0.19219000 | 0.18915000  | -0.00489900 | H | -0.23895400 | -0.62279200 | 0.70933500  | C | -1.33801000 | 0.64517800  | -0.59768100 | O | -1.42702700 | 1.65022900 | -1.39394000 | C | -2.63643000 | -0.06291400 | -0.26317300 | C | -3.83100700 | 0.65328400  | -0.34175800 | C | -2.71286800 | -1.40637200 | 0.11179000  | C | -5.04938000 | 0.06615800 | -0.03140400 | H | -3.78333200 | 1.68893800  | -0.65346100 | C | -3.92844700 | -2.00125600 | 0.41691200  | H | -1.80820000 | -2.00060200 | 1.04982100  | C | -5.10552400 | -1.26668500 | 0.35239200  | H | -5.95998800 | 0.65114300 | -0.09011100 | H | -3.95809900 | -3.04742000 | 0.69844300  | H | -6.05096000 | -1.73052600 | 0.58993100 | C | 1.14186000  | 0.83405400 | -0.24928200 | H | 1.13115400  | 1.26728600  | -1.25048300 | C | 1.49993800  | 2.02144900 | 0.70584700 | O                                                                                                                                                                                                                                                                                                                                                                                                                                                                                                                                                                                                                                                                                                                                                                                                                                                                                                                                                                                                                                                                                                                                                                                                                                                                                                                                                                                                                                                                                                                                                                                                                                                                                                                                                                                                                                                                                                                                                                                                                                                                                                                                                                                                                                                                                                                                                                                                                                                                                                                      | 1.15317300 | 1.94548900 | 1.90526600 | O           | 2.14940100 | 2.96188400 | 0.18709100 | <p>-2 1</p> <table border="1"> <tbody> <tr><td>C</td><td>3.53528600</td><td>-2.15220800</td><td>0.63773000</td></tr> <tr><td>C</td><td>2.33205500</td><td>-1.53260400</td><td>0.35933700</td></tr> <tr><td>C</td><td>2.24806000</td><td>-0.36005100</td><td>-0.46700800</td></tr> <tr><td>C</td><td>3.51333600</td><td>0.08547500</td><td>-0.98260300</td></tr> <tr><td>C</td><td>4.69977400</td><td>-0.54513200</td><td>-0.69020400</td></tr> <tr><td>C</td><td>4.74730300</td><td>-1.68144400</td><td>0.13099000</td></tr> <tr><td>H</td><td>3.53081300</td><td>-3.03335900</td><td>1.27367600</td></tr> <tr><td>H</td><td>1.42661300</td><td>-1.93971100</td><td>0.79427000</td></tr> <tr><td>H</td><td>3.52133500</td><td>0.96108800</td><td>-1.62461300</td></tr> <tr><td>H</td><td>5.62014400</td><td>-0.15161500</td><td>-1.11254800</td></tr> <tr><td>H</td><td>5.68333500</td><td>-2.17760100</td><td>0.35350500</td></tr> <tr><td>C</td><td>-0.27067900</td><td>-0.14706500</td><td>-0.44940300</td></tr> <tr><td>H</td><td>-0.36547400</td><td>-1.13113300</td><td>0.03271200</td></tr> <tr><td>C</td><td>-1.42678400</td><td>0.56386000</td><td>-0.69157900</td></tr> <tr><td>O</td><td>-1.46242600</td><td>1.76134800</td><td>-1.19619300</td></tr> <tr><td>C</td><td>-2.73959900</td><td>-0.04606200</td><td>-0.30713600</td></tr> <tr><td>C</td><td>-3.87087700</td><td>0.78009300</td><td>-0.23964700</td></tr> <tr><td>C</td><td>-2.94157400</td><td>-1.40699300</td><td>-0.01747900</td></tr> <tr><td>C</td><td>-5.11820900</td><td>0.28981700</td><td>0.12075500</td></tr> <tr><td>H</td><td>-3.73864300</td><td>1.82726800</td><td>-0.47749100</td></tr> <tr><td>C</td><td>-4.18427000</td><td>-1.89860700</td><td>0.34223100</td></tr> <tr><td>H</td><td>-2.11378100</td><td>-2.10079400</td><td>-0.09395900</td></tr> <tr><td>C</td><td>-5.28929900</td><td>-1.05448700</td><td>0.41916900</td></tr> <tr><td>H</td><td>-5.96559800</td><td>0.96524500</td><td>0.16764400</td></tr> <tr><td>H</td><td>-4.29706400</td><td>-2.95600900</td><td>0.55441300</td></tr> <tr><td>H</td><td>-6.26230600</td><td>-1.44238300</td><td>0.69460700</td></tr> <tr><td>C</td><td>1.05567300</td><td>0.31877700</td><td>-0.75743300</td></tr> <tr><td>H</td><td>1.12709800</td><td>1.17345800</td><td>-1.42190300</td></tr> <tr><td>C</td><td>1.60372700</td><td>2.12739100</td><td>1.10068800</td></tr> <tr><td>O</td><td>1.03031000</td><td>1.64322100</td><td>1.99266100</td></tr> <tr><td>O</td><td>2.24086700</td><td>2.83830100</td><td>0.42968800</td></tr> </tbody> </table> | C | 3.53528600 | -2.15220800 | 0.63773000  | C | 2.33205500 | -1.53260400 | 0.35933700  | C | 2.24806000 | -0.36005100 | -0.46700800 | C | 3.51333600 | 0.08547500  | -0.98260300 | C | 4.69977400 | -0.54513200 | -0.69020400 | C | 4.74730300 | -1.68144400 | 0.13099000  | H | 3.53081300 | -3.03335900 | 1.27367600 | H | 1.42661300 | -1.93971100 | 0.79427000 | H | 3.52133500 | 0.96108800 | -1.62461300 | H | 5.62014400 | -0.15161500 | -1.11254800 | H | 5.68333500 | -2.17760100 | 0.35350500  | C | -0.27067900 | -0.14706500 | -0.44940300 | H | -0.36547400 | -1.13113300 | 0.03271200  | C | -1.42678400 | 0.56386000 | -0.69157900 | O | -1.46242600 | 1.76134800  | -1.19619300 | C | -2.73959900 | -0.04606200 | -0.30713600 | C | -3.87087700 | 0.78009300 | -0.23964700 | C | -2.94157400 | -1.40699300 | -0.01747900 | C | -5.11820900 | 0.28981700  | 0.12075500  | H | -3.73864300 | 1.82726800  | -0.47749100 | C | -4.18427000 | -1.89860700 | 0.34223100  | H | -2.11378100 | -2.10079400 | -0.09395900 | C | -5.28929900 | -1.05448700 | 0.41916900  | H | -5.96559800 | 0.96524500 | 0.16764400  | H | -4.29706400 | -2.95600900 | 0.55441300  | H | -6.26230600 | -1.44238300 | 0.69460700 | C | 1.05567300  | 0.31877700  | -0.75743300 | H | 1.12709800  | 1.17345800 | -1.42190300 | C | 1.60372700 | 2.12739100 | 1.10068800 | O | 1.03031000 | 1.64322100 | 1.99266100 | O | 2.24086700 | 2.83830100 | 0.42968800 |
| C                                                                                                                                                                                                                                                                                                                                                                                                                                                                                                                                                                                                                                                                                                                                                                                                                                                                                                                                                                                                                                                                                                                                                                                                                                                                                                                                                                                                                                                                                                                                                                                                                                                                                                                                                                                                                                                                                                                                                                                                                                                                                                                                                                                                                                                                                                                                               | 3.96729700  | 1.69394500                                                                         | -0.08322800                                                                          |             |   |            |            |             |   |            |             |             |   |            |             |             |   |            |             |             |   |            |             |             |   |            |            |             |   |            |             |             |   |            |             |            |   |            |             |             |   |            |            |             |   |            |             |             |   |            |             |             |   |             |             |             |   |             |             |             |   |             |             |            |   |             |             |             |   |             |             |             |   |             |             |             |   |             |             |             |   |             |             |            |   |             |             |             |   |             |            |             |   |             |             |             |   |             |            |             |   |             |            |             |   |             |             |             |                                                                                                                                                                                                                                                                                                                                                                                                                                                                                                                                                                                                                                                                                                                                                                                                                                                                                                                                                                                                                                                                                                                                                                                                                                                                                                                                                                                                                                                                                                                                                                                                                                                                                                                                                                                                                                                                                                                                                                                                                                                                                                                                                                                                                                                                                                                                                                                                                                                                                                                     |            |             |            |                                                                                                                                                                                                                                                                                                                                                                                                                                                                                                                                                                                                                                                                                                                                                                                                                                                                                                                                                                                                                                                                                                                                                                                                                                                                                                                                                                                                                                                                                                                                                                                                                                                                                                                                                                                                                                                                                                                                                                                                                                                                                                                                                                                                                                                                                                                                                                                                                                                                                                                                                                                               |   |            |             |             |   |            |             |             |   |            |             |             |   |            |             |             |   |            |             |             |   |            |             |             |   |            |             |            |   |            |             |            |   |            |             |             |   |            |             |             |   |            |             |             |   |             |             |             |   |             |             |             |   |             |             |             |   |             |            |             |   |             |             |             |   |             |             |             |   |             |             |             |   |             |            |             |   |             |             |             |   |             |             |             |   |             |             |             |   |             |             |             |   |             |            |             |   |             |             |             |   |             |             |            |   |             |            |             |   |             |             |             |   |             |            |            |                                                                                                                                                                                                                                                                                                                                                                                                                                                                                                                                                                                                                                                                                                                                                                                                                                                                                                                                                                                                                                                                                                                                                                                                                                                                                                                                                                                                                                                                                                                                                                                                                                                                                                                                                                                                                                                                                                                                                                                                                                                                                                                                                                                                                                                                                                                                                                                                                                                                                                                        |            |            |            |             |            |            |            |                                                                                                                                                                                                                                                                                                                                                                                                                                                                                                                                                                                                                                                                                                                                                                                                                                                                                                                                                                                                                                                                                                                                                                                                                                                                                                                                                                                                                                                                                                                                                                                                                                                                                                                                                                                                                                                                                                                                                                                                                                                                                                                                                                                                                                                                                                                                                                                                                                                                                                                                                                                             |   |            |             |             |   |            |             |             |   |            |             |             |   |            |             |             |   |            |             |             |   |            |             |             |   |            |             |            |   |            |             |            |   |            |            |             |   |            |             |             |   |            |             |             |   |             |             |             |   |             |             |             |   |             |            |             |   |             |             |             |   |             |             |             |   |             |            |             |   |             |             |             |   |             |             |             |   |             |             |             |   |             |             |             |   |             |             |             |   |             |             |             |   |             |            |             |   |             |             |             |   |             |             |            |   |             |             |             |   |             |            |             |   |            |            |            |   |            |            |            |   |            |            |            |
| C                                                                                                                                                                                                                                                                                                                                                                                                                                                                                                                                                                                                                                                                                                                                                                                                                                                                                                                                                                                                                                                                                                                                                                                                                                                                                                                                                                                                                                                                                                                                                                                                                                                                                                                                                                                                                                                                                                                                                                                                                                                                                                                                                                                                                                                                                                                                               | 2.72478400  | 1.09441500                                                                         | -0.04667200                                                                          |             |   |            |            |             |   |            |             |             |   |            |             |             |   |            |             |             |   |            |             |             |   |            |            |             |   |            |             |             |   |            |             |            |   |            |             |             |   |            |            |             |   |            |             |             |   |            |             |             |   |             |             |             |   |             |             |             |   |             |             |            |   |             |             |             |   |             |             |             |   |             |             |             |   |             |             |             |   |             |             |            |   |             |             |             |   |             |            |             |   |             |             |             |   |             |            |             |   |             |            |             |   |             |             |             |                                                                                                                                                                                                                                                                                                                                                                                                                                                                                                                                                                                                                                                                                                                                                                                                                                                                                                                                                                                                                                                                                                                                                                                                                                                                                                                                                                                                                                                                                                                                                                                                                                                                                                                                                                                                                                                                                                                                                                                                                                                                                                                                                                                                                                                                                                                                                                                                                                                                                                                     |            |             |            |                                                                                                                                                                                                                                                                                                                                                                                                                                                                                                                                                                                                                                                                                                                                                                                                                                                                                                                                                                                                                                                                                                                                                                                                                                                                                                                                                                                                                                                                                                                                                                                                                                                                                                                                                                                                                                                                                                                                                                                                                                                                                                                                                                                                                                                                                                                                                                                                                                                                                                                                                                                               |   |            |             |             |   |            |             |             |   |            |             |             |   |            |             |             |   |            |             |             |   |            |             |             |   |            |             |            |   |            |             |            |   |            |             |             |   |            |             |             |   |            |             |             |   |             |             |             |   |             |             |             |   |             |             |             |   |             |            |             |   |             |             |             |   |             |             |             |   |             |             |             |   |             |            |             |   |             |             |             |   |             |             |             |   |             |             |             |   |             |             |             |   |             |            |             |   |             |             |             |   |             |             |            |   |             |            |             |   |             |             |             |   |             |            |            |                                                                                                                                                                                                                                                                                                                                                                                                                                                                                                                                                                                                                                                                                                                                                                                                                                                                                                                                                                                                                                                                                                                                                                                                                                                                                                                                                                                                                                                                                                                                                                                                                                                                                                                                                                                                                                                                                                                                                                                                                                                                                                                                                                                                                                                                                                                                                                                                                                                                                                                        |            |            |            |             |            |            |            |                                                                                                                                                                                                                                                                                                                                                                                                                                                                                                                                                                                                                                                                                                                                                                                                                                                                                                                                                                                                                                                                                                                                                                                                                                                                                                                                                                                                                                                                                                                                                                                                                                                                                                                                                                                                                                                                                                                                                                                                                                                                                                                                                                                                                                                                                                                                                                                                                                                                                                                                                                                             |   |            |             |             |   |            |             |             |   |            |             |             |   |            |             |             |   |            |             |             |   |            |             |             |   |            |             |            |   |            |             |            |   |            |            |             |   |            |             |             |   |            |             |             |   |             |             |             |   |             |             |             |   |             |            |             |   |             |             |             |   |             |             |             |   |             |            |             |   |             |             |             |   |             |             |             |   |             |             |             |   |             |             |             |   |             |             |             |   |             |             |             |   |             |            |             |   |             |             |             |   |             |             |            |   |             |             |             |   |             |            |             |   |            |            |            |   |            |            |            |   |            |            |            |
| C                                                                                                                                                                                                                                                                                                                                                                                                                                                                                                                                                                                                                                                                                                                                                                                                                                                                                                                                                                                                                                                                                                                                                                                                                                                                                                                                                                                                                                                                                                                                                                                                                                                                                                                                                                                                                                                                                                                                                                                                                                                                                                                                                                                                                                                                                                                                               | 2.56060600  | -0.33872500                                                                        | 0.00587900                                                                           |             |   |            |            |             |   |            |             |             |   |            |             |             |   |            |             |             |   |            |             |             |   |            |            |             |   |            |             |             |   |            |             |            |   |            |             |             |   |            |            |             |   |            |             |             |   |            |             |             |   |             |             |             |   |             |             |             |   |             |             |            |   |             |             |             |   |             |             |             |   |             |             |             |   |             |             |             |   |             |             |            |   |             |             |             |   |             |            |             |   |             |             |             |   |             |            |             |   |             |            |             |   |             |             |             |                                                                                                                                                                                                                                                                                                                                                                                                                                                                                                                                                                                                                                                                                                                                                                                                                                                                                                                                                                                                                                                                                                                                                                                                                                                                                                                                                                                                                                                                                                                                                                                                                                                                                                                                                                                                                                                                                                                                                                                                                                                                                                                                                                                                                                                                                                                                                                                                                                                                                                                     |            |             |            |                                                                                                                                                                                                                                                                                                                                                                                                                                                                                                                                                                                                                                                                                                                                                                                                                                                                                                                                                                                                                                                                                                                                                                                                                                                                                                                                                                                                                                                                                                                                                                                                                                                                                                                                                                                                                                                                                                                                                                                                                                                                                                                                                                                                                                                                                                                                                                                                                                                                                                                                                                                               |   |            |             |             |   |            |             |             |   |            |             |             |   |            |             |             |   |            |             |             |   |            |             |             |   |            |             |            |   |            |             |            |   |            |             |             |   |            |             |             |   |            |             |             |   |             |             |             |   |             |             |             |   |             |             |             |   |             |            |             |   |             |             |             |   |             |             |             |   |             |             |             |   |             |            |             |   |             |             |             |   |             |             |             |   |             |             |             |   |             |             |             |   |             |            |             |   |             |             |             |   |             |             |            |   |             |            |             |   |             |             |             |   |             |            |            |                                                                                                                                                                                                                                                                                                                                                                                                                                                                                                                                                                                                                                                                                                                                                                                                                                                                                                                                                                                                                                                                                                                                                                                                                                                                                                                                                                                                                                                                                                                                                                                                                                                                                                                                                                                                                                                                                                                                                                                                                                                                                                                                                                                                                                                                                                                                                                                                                                                                                                                        |            |            |            |             |            |            |            |                                                                                                                                                                                                                                                                                                                                                                                                                                                                                                                                                                                                                                                                                                                                                                                                                                                                                                                                                                                                                                                                                                                                                                                                                                                                                                                                                                                                                                                                                                                                                                                                                                                                                                                                                                                                                                                                                                                                                                                                                                                                                                                                                                                                                                                                                                                                                                                                                                                                                                                                                                                             |   |            |             |             |   |            |             |             |   |            |             |             |   |            |             |             |   |            |             |             |   |            |             |             |   |            |             |            |   |            |             |            |   |            |            |             |   |            |             |             |   |            |             |             |   |             |             |             |   |             |             |             |   |             |            |             |   |             |             |             |   |             |             |             |   |             |            |             |   |             |             |             |   |             |             |             |   |             |             |             |   |             |             |             |   |             |             |             |   |             |             |             |   |             |            |             |   |             |             |             |   |             |             |            |   |             |             |             |   |             |            |             |   |            |            |            |   |            |            |            |   |            |            |            |
| C                                                                                                                                                                                                                                                                                                                                                                                                                                                                                                                                                                                                                                                                                                                                                                                                                                                                                                                                                                                                                                                                                                                                                                                                                                                                                                                                                                                                                                                                                                                                                                                                                                                                                                                                                                                                                                                                                                                                                                                                                                                                                                                                                                                                                                                                                                                                               | 3.80846700  | -1.06286800                                                                        | 0.01379700                                                                           |             |   |            |            |             |   |            |             |             |   |            |             |             |   |            |             |             |   |            |             |             |   |            |            |             |   |            |             |             |   |            |             |            |   |            |             |             |   |            |            |             |   |            |             |             |   |            |             |             |   |             |             |             |   |             |             |             |   |             |             |            |   |             |             |             |   |             |             |             |   |             |             |             |   |             |             |             |   |             |             |            |   |             |             |             |   |             |            |             |   |             |             |             |   |             |            |             |   |             |            |             |   |             |             |             |                                                                                                                                                                                                                                                                                                                                                                                                                                                                                                                                                                                                                                                                                                                                                                                                                                                                                                                                                                                                                                                                                                                                                                                                                                                                                                                                                                                                                                                                                                                                                                                                                                                                                                                                                                                                                                                                                                                                                                                                                                                                                                                                                                                                                                                                                                                                                                                                                                                                                                                     |            |             |            |                                                                                                                                                                                                                                                                                                                                                                                                                                                                                                                                                                                                                                                                                                                                                                                                                                                                                                                                                                                                                                                                                                                                                                                                                                                                                                                                                                                                                                                                                                                                                                                                                                                                                                                                                                                                                                                                                                                                                                                                                                                                                                                                                                                                                                                                                                                                                                                                                                                                                                                                                                                               |   |            |             |             |   |            |             |             |   |            |             |             |   |            |             |             |   |            |             |             |   |            |             |             |   |            |             |            |   |            |             |            |   |            |             |             |   |            |             |             |   |            |             |             |   |             |             |             |   |             |             |             |   |             |             |             |   |             |            |             |   |             |             |             |   |             |             |             |   |             |             |             |   |             |            |             |   |             |             |             |   |             |             |             |   |             |             |             |   |             |             |             |   |             |            |             |   |             |             |             |   |             |             |            |   |             |            |             |   |             |             |             |   |             |            |            |                                                                                                                                                                                                                                                                                                                                                                                                                                                                                                                                                                                                                                                                                                                                                                                                                                                                                                                                                                                                                                                                                                                                                                                                                                                                                                                                                                                                                                                                                                                                                                                                                                                                                                                                                                                                                                                                                                                                                                                                                                                                                                                                                                                                                                                                                                                                                                                                                                                                                                                        |            |            |            |             |            |            |            |                                                                                                                                                                                                                                                                                                                                                                                                                                                                                                                                                                                                                                                                                                                                                                                                                                                                                                                                                                                                                                                                                                                                                                                                                                                                                                                                                                                                                                                                                                                                                                                                                                                                                                                                                                                                                                                                                                                                                                                                                                                                                                                                                                                                                                                                                                                                                                                                                                                                                                                                                                                             |   |            |             |             |   |            |             |             |   |            |             |             |   |            |             |             |   |            |             |             |   |            |             |             |   |            |             |            |   |            |             |            |   |            |            |             |   |            |             |             |   |            |             |             |   |             |             |             |   |             |             |             |   |             |            |             |   |             |             |             |   |             |             |             |   |             |            |             |   |             |             |             |   |             |             |             |   |             |             |             |   |             |             |             |   |             |             |             |   |             |             |             |   |             |            |             |   |             |             |             |   |             |             |            |   |             |             |             |   |             |            |             |   |            |            |            |   |            |            |            |   |            |            |            |
| C                                                                                                                                                                                                                                                                                                                                                                                                                                                                                                                                                                                                                                                                                                                                                                                                                                                                                                                                                                                                                                                                                                                                                                                                                                                                                                                                                                                                                                                                                                                                                                                                                                                                                                                                                                                                                                                                                                                                                                                                                                                                                                                                                                                                                                                                                                                                               | 5.03340900  | -0.44179200                                                                        | -0.02383000                                                                          |             |   |            |            |             |   |            |             |             |   |            |             |             |   |            |             |             |   |            |             |             |   |            |            |             |   |            |             |             |   |            |             |            |   |            |             |             |   |            |            |             |   |            |             |             |   |            |             |             |   |             |             |             |   |             |             |             |   |             |             |            |   |             |             |             |   |             |             |             |   |             |             |             |   |             |             |             |   |             |             |            |   |             |             |             |   |             |            |             |   |             |             |             |   |             |            |             |   |             |            |             |   |             |             |             |                                                                                                                                                                                                                                                                                                                                                                                                                                                                                                                                                                                                                                                                                                                                                                                                                                                                                                                                                                                                                                                                                                                                                                                                                                                                                                                                                                                                                                                                                                                                                                                                                                                                                                                                                                                                                                                                                                                                                                                                                                                                                                                                                                                                                                                                                                                                                                                                                                                                                                                     |            |             |            |                                                                                                                                                                                                                                                                                                                                                                                                                                                                                                                                                                                                                                                                                                                                                                                                                                                                                                                                                                                                                                                                                                                                                                                                                                                                                                                                                                                                                                                                                                                                                                                                                                                                                                                                                                                                                                                                                                                                                                                                                                                                                                                                                                                                                                                                                                                                                                                                                                                                                                                                                                                               |   |            |             |             |   |            |             |             |   |            |             |             |   |            |             |             |   |            |             |             |   |            |             |             |   |            |             |            |   |            |             |            |   |            |             |             |   |            |             |             |   |            |             |             |   |             |             |             |   |             |             |             |   |             |             |             |   |             |            |             |   |             |             |             |   |             |             |             |   |             |             |             |   |             |            |             |   |             |             |             |   |             |             |             |   |             |             |             |   |             |             |             |   |             |            |             |   |             |             |             |   |             |             |            |   |             |            |             |   |             |             |             |   |             |            |            |                                                                                                                                                                                                                                                                                                                                                                                                                                                                                                                                                                                                                                                                                                                                                                                                                                                                                                                                                                                                                                                                                                                                                                                                                                                                                                                                                                                                                                                                                                                                                                                                                                                                                                                                                                                                                                                                                                                                                                                                                                                                                                                                                                                                                                                                                                                                                                                                                                                                                                                        |            |            |            |             |            |            |            |                                                                                                                                                                                                                                                                                                                                                                                                                                                                                                                                                                                                                                                                                                                                                                                                                                                                                                                                                                                                                                                                                                                                                                                                                                                                                                                                                                                                                                                                                                                                                                                                                                                                                                                                                                                                                                                                                                                                                                                                                                                                                                                                                                                                                                                                                                                                                                                                                                                                                                                                                                                             |   |            |             |             |   |            |             |             |   |            |             |             |   |            |             |             |   |            |             |             |   |            |             |             |   |            |             |            |   |            |             |            |   |            |            |             |   |            |             |             |   |            |             |             |   |             |             |             |   |             |             |             |   |             |            |             |   |             |             |             |   |             |             |             |   |             |            |             |   |             |             |             |   |             |             |             |   |             |             |             |   |             |             |             |   |             |             |             |   |             |             |             |   |             |            |             |   |             |             |             |   |             |             |            |   |             |             |             |   |             |            |             |   |            |            |            |   |            |            |            |   |            |            |            |
| C                                                                                                                                                                                                                                                                                                                                                                                                                                                                                                                                                                                                                                                                                                                                                                                                                                                                                                                                                                                                                                                                                                                                                                                                                                                                                                                                                                                                                                                                                                                                                                                                                                                                                                                                                                                                                                                                                                                                                                                                                                                                                                                                                                                                                                                                                                                                               | 5.15455900  | 0.95677500                                                                         | -0.07309400                                                                          |             |   |            |            |             |   |            |             |             |   |            |             |             |   |            |             |             |   |            |             |             |   |            |            |             |   |            |             |             |   |            |             |            |   |            |             |             |   |            |            |             |   |            |             |             |   |            |             |             |   |             |             |             |   |             |             |             |   |             |             |            |   |             |             |             |   |             |             |             |   |             |             |             |   |             |             |             |   |             |             |            |   |             |             |             |   |             |            |             |   |             |             |             |   |             |            |             |   |             |            |             |   |             |             |             |                                                                                                                                                                                                                                                                                                                                                                                                                                                                                                                                                                                                                                                                                                                                                                                                                                                                                                                                                                                                                                                                                                                                                                                                                                                                                                                                                                                                                                                                                                                                                                                                                                                                                                                                                                                                                                                                                                                                                                                                                                                                                                                                                                                                                                                                                                                                                                                                                                                                                                                     |            |             |            |                                                                                                                                                                                                                                                                                                                                                                                                                                                                                                                                                                                                                                                                                                                                                                                                                                                                                                                                                                                                                                                                                                                                                                                                                                                                                                                                                                                                                                                                                                                                                                                                                                                                                                                                                                                                                                                                                                                                                                                                                                                                                                                                                                                                                                                                                                                                                                                                                                                                                                                                                                                               |   |            |             |             |   |            |             |             |   |            |             |             |   |            |             |             |   |            |             |             |   |            |             |             |   |            |             |            |   |            |             |            |   |            |             |             |   |            |             |             |   |            |             |             |   |             |             |             |   |             |             |             |   |             |             |             |   |             |            |             |   |             |             |             |   |             |             |             |   |             |             |             |   |             |            |             |   |             |             |             |   |             |             |             |   |             |             |             |   |             |             |             |   |             |            |             |   |             |             |             |   |             |             |            |   |             |            |             |   |             |             |             |   |             |            |            |                                                                                                                                                                                                                                                                                                                                                                                                                                                                                                                                                                                                                                                                                                                                                                                                                                                                                                                                                                                                                                                                                                                                                                                                                                                                                                                                                                                                                                                                                                                                                                                                                                                                                                                                                                                                                                                                                                                                                                                                                                                                                                                                                                                                                                                                                                                                                                                                                                                                                                                        |            |            |            |             |            |            |            |                                                                                                                                                                                                                                                                                                                                                                                                                                                                                                                                                                                                                                                                                                                                                                                                                                                                                                                                                                                                                                                                                                                                                                                                                                                                                                                                                                                                                                                                                                                                                                                                                                                                                                                                                                                                                                                                                                                                                                                                                                                                                                                                                                                                                                                                                                                                                                                                                                                                                                                                                                                             |   |            |             |             |   |            |             |             |   |            |             |             |   |            |             |             |   |            |             |             |   |            |             |             |   |            |             |            |   |            |             |            |   |            |            |             |   |            |             |             |   |            |             |             |   |             |             |             |   |             |             |             |   |             |            |             |   |             |             |             |   |             |             |             |   |             |            |             |   |             |             |             |   |             |             |             |   |             |             |             |   |             |             |             |   |             |             |             |   |             |             |             |   |             |            |             |   |             |             |             |   |             |             |            |   |             |             |             |   |             |            |             |   |            |            |            |   |            |            |            |   |            |            |            |
| H                                                                                                                                                                                                                                                                                                                                                                                                                                                                                                                                                                                                                                                                                                                                                                                                                                                                                                                                                                                                                                                                                                                                                                                                                                                                                                                                                                                                                                                                                                                                                                                                                                                                                                                                                                                                                                                                                                                                                                                                                                                                                                                                                                                                                                                                                                                                               | 4.01671000  | 2.77927900                                                                         | -0.12082700                                                                          |             |   |            |            |             |   |            |             |             |   |            |             |             |   |            |             |             |   |            |             |             |   |            |            |             |   |            |             |             |   |            |             |            |   |            |             |             |   |            |            |             |   |            |             |             |   |            |             |             |   |             |             |             |   |             |             |             |   |             |             |            |   |             |             |             |   |             |             |             |   |             |             |             |   |             |             |             |   |             |             |            |   |             |             |             |   |             |            |             |   |             |             |             |   |             |            |             |   |             |            |             |   |             |             |             |                                                                                                                                                                                                                                                                                                                                                                                                                                                                                                                                                                                                                                                                                                                                                                                                                                                                                                                                                                                                                                                                                                                                                                                                                                                                                                                                                                                                                                                                                                                                                                                                                                                                                                                                                                                                                                                                                                                                                                                                                                                                                                                                                                                                                                                                                                                                                                                                                                                                                                                     |            |             |            |                                                                                                                                                                                                                                                                                                                                                                                                                                                                                                                                                                                                                                                                                                                                                                                                                                                                                                                                                                                                                                                                                                                                                                                                                                                                                                                                                                                                                                                                                                                                                                                                                                                                                                                                                                                                                                                                                                                                                                                                                                                                                                                                                                                                                                                                                                                                                                                                                                                                                                                                                                                               |   |            |             |             |   |            |             |             |   |            |             |             |   |            |             |             |   |            |             |             |   |            |             |             |   |            |             |            |   |            |             |            |   |            |             |             |   |            |             |             |   |            |             |             |   |             |             |             |   |             |             |             |   |             |             |             |   |             |            |             |   |             |             |             |   |             |             |             |   |             |             |             |   |             |            |             |   |             |             |             |   |             |             |             |   |             |             |             |   |             |             |             |   |             |            |             |   |             |             |             |   |             |             |            |   |             |            |             |   |             |             |             |   |             |            |            |                                                                                                                                                                                                                                                                                                                                                                                                                                                                                                                                                                                                                                                                                                                                                                                                                                                                                                                                                                                                                                                                                                                                                                                                                                                                                                                                                                                                                                                                                                                                                                                                                                                                                                                                                                                                                                                                                                                                                                                                                                                                                                                                                                                                                                                                                                                                                                                                                                                                                                                        |            |            |            |             |            |            |            |                                                                                                                                                                                                                                                                                                                                                                                                                                                                                                                                                                                                                                                                                                                                                                                                                                                                                                                                                                                                                                                                                                                                                                                                                                                                                                                                                                                                                                                                                                                                                                                                                                                                                                                                                                                                                                                                                                                                                                                                                                                                                                                                                                                                                                                                                                                                                                                                                                                                                                                                                                                             |   |            |             |             |   |            |             |             |   |            |             |             |   |            |             |             |   |            |             |             |   |            |             |             |   |            |             |            |   |            |             |            |   |            |            |             |   |            |             |             |   |            |             |             |   |             |             |             |   |             |             |             |   |             |            |             |   |             |             |             |   |             |             |             |   |             |            |             |   |             |             |             |   |             |             |             |   |             |             |             |   |             |             |             |   |             |             |             |   |             |             |             |   |             |            |             |   |             |             |             |   |             |             |            |   |             |             |             |   |             |            |             |   |            |            |            |   |            |            |            |   |            |            |            |
| H                                                                                                                                                                                                                                                                                                                                                                                                                                                                                                                                                                                                                                                                                                                                                                                                                                                                                                                                                                                                                                                                                                                                                                                                                                                                                                                                                                                                                                                                                                                                                                                                                                                                                                                                                                                                                                                                                                                                                                                                                                                                                                                                                                                                                                                                                                                                               | 1.84528300  | 1.72815100                                                                         | -0.05619500                                                                          |             |   |            |            |             |   |            |             |             |   |            |             |             |   |            |             |             |   |            |             |             |   |            |            |             |   |            |             |             |   |            |             |            |   |            |             |             |   |            |            |             |   |            |             |             |   |            |             |             |   |             |             |             |   |             |             |             |   |             |             |            |   |             |             |             |   |             |             |             |   |             |             |             |   |             |             |             |   |             |             |            |   |             |             |             |   |             |            |             |   |             |             |             |   |             |            |             |   |             |            |             |   |             |             |             |                                                                                                                                                                                                                                                                                                                                                                                                                                                                                                                                                                                                                                                                                                                                                                                                                                                                                                                                                                                                                                                                                                                                                                                                                                                                                                                                                                                                                                                                                                                                                                                                                                                                                                                                                                                                                                                                                                                                                                                                                                                                                                                                                                                                                                                                                                                                                                                                                                                                                                                     |            |             |            |                                                                                                                                                                                                                                                                                                                                                                                                                                                                                                                                                                                                                                                                                                                                                                                                                                                                                                                                                                                                                                                                                                                                                                                                                                                                                                                                                                                                                                                                                                                                                                                                                                                                                                                                                                                                                                                                                                                                                                                                                                                                                                                                                                                                                                                                                                                                                                                                                                                                                                                                                                                               |   |            |             |             |   |            |             |             |   |            |             |             |   |            |             |             |   |            |             |             |   |            |             |             |   |            |             |            |   |            |             |            |   |            |             |             |   |            |             |             |   |            |             |             |   |             |             |             |   |             |             |             |   |             |             |             |   |             |            |             |   |             |             |             |   |             |             |             |   |             |             |             |   |             |            |             |   |             |             |             |   |             |             |             |   |             |             |             |   |             |             |             |   |             |            |             |   |             |             |             |   |             |             |            |   |             |            |             |   |             |             |             |   |             |            |            |                                                                                                                                                                                                                                                                                                                                                                                                                                                                                                                                                                                                                                                                                                                                                                                                                                                                                                                                                                                                                                                                                                                                                                                                                                                                                                                                                                                                                                                                                                                                                                                                                                                                                                                                                                                                                                                                                                                                                                                                                                                                                                                                                                                                                                                                                                                                                                                                                                                                                                                        |            |            |            |             |            |            |            |                                                                                                                                                                                                                                                                                                                                                                                                                                                                                                                                                                                                                                                                                                                                                                                                                                                                                                                                                                                                                                                                                                                                                                                                                                                                                                                                                                                                                                                                                                                                                                                                                                                                                                                                                                                                                                                                                                                                                                                                                                                                                                                                                                                                                                                                                                                                                                                                                                                                                                                                                                                             |   |            |             |             |   |            |             |             |   |            |             |             |   |            |             |             |   |            |             |             |   |            |             |             |   |            |             |            |   |            |             |            |   |            |            |             |   |            |             |             |   |            |             |             |   |             |             |             |   |             |             |             |   |             |            |             |   |             |             |             |   |             |             |             |   |             |            |             |   |             |             |             |   |             |             |             |   |             |             |             |   |             |             |             |   |             |             |             |   |             |             |             |   |             |            |             |   |             |             |             |   |             |             |            |   |             |             |             |   |             |            |             |   |            |            |            |   |            |            |            |   |            |            |            |
| H                                                                                                                                                                                                                                                                                                                                                                                                                                                                                                                                                                                                                                                                                                                                                                                                                                                                                                                                                                                                                                                                                                                                                                                                                                                                                                                                                                                                                                                                                                                                                                                                                                                                                                                                                                                                                                                                                                                                                                                                                                                                                                                                                                                                                                                                                                                                               | 3.76649000  | -2.14833300                                                                        | 0.05194900                                                                           |             |   |            |            |             |   |            |             |             |   |            |             |             |   |            |             |             |   |            |             |             |   |            |            |             |   |            |             |             |   |            |             |            |   |            |             |             |   |            |            |             |   |            |             |             |   |            |             |             |   |             |             |             |   |             |             |             |   |             |             |            |   |             |             |             |   |             |             |             |   |             |             |             |   |             |             |             |   |             |             |            |   |             |             |             |   |             |            |             |   |             |             |             |   |             |            |             |   |             |            |             |   |             |             |             |                                                                                                                                                                                                                                                                                                                                                                                                                                                                                                                                                                                                                                                                                                                                                                                                                                                                                                                                                                                                                                                                                                                                                                                                                                                                                                                                                                                                                                                                                                                                                                                                                                                                                                                                                                                                                                                                                                                                                                                                                                                                                                                                                                                                                                                                                                                                                                                                                                                                                                                     |            |             |            |                                                                                                                                                                                                                                                                                                                                                                                                                                                                                                                                                                                                                                                                                                                                                                                                                                                                                                                                                                                                                                                                                                                                                                                                                                                                                                                                                                                                                                                                                                                                                                                                                                                                                                                                                                                                                                                                                                                                                                                                                                                                                                                                                                                                                                                                                                                                                                                                                                                                                                                                                                                               |   |            |             |             |   |            |             |             |   |            |             |             |   |            |             |             |   |            |             |             |   |            |             |             |   |            |             |            |   |            |             |            |   |            |             |             |   |            |             |             |   |            |             |             |   |             |             |             |   |             |             |             |   |             |             |             |   |             |            |             |   |             |             |             |   |             |             |             |   |             |             |             |   |             |            |             |   |             |             |             |   |             |             |             |   |             |             |             |   |             |             |             |   |             |            |             |   |             |             |             |   |             |             |            |   |             |            |             |   |             |             |             |   |             |            |            |                                                                                                                                                                                                                                                                                                                                                                                                                                                                                                                                                                                                                                                                                                                                                                                                                                                                                                                                                                                                                                                                                                                                                                                                                                                                                                                                                                                                                                                                                                                                                                                                                                                                                                                                                                                                                                                                                                                                                                                                                                                                                                                                                                                                                                                                                                                                                                                                                                                                                                                        |            |            |            |             |            |            |            |                                                                                                                                                                                                                                                                                                                                                                                                                                                                                                                                                                                                                                                                                                                                                                                                                                                                                                                                                                                                                                                                                                                                                                                                                                                                                                                                                                                                                                                                                                                                                                                                                                                                                                                                                                                                                                                                                                                                                                                                                                                                                                                                                                                                                                                                                                                                                                                                                                                                                                                                                                                             |   |            |             |             |   |            |             |             |   |            |             |             |   |            |             |             |   |            |             |             |   |            |             |             |   |            |             |            |   |            |             |            |   |            |            |             |   |            |             |             |   |            |             |             |   |             |             |             |   |             |             |             |   |             |            |             |   |             |             |             |   |             |             |             |   |             |            |             |   |             |             |             |   |             |             |             |   |             |             |             |   |             |             |             |   |             |             |             |   |             |             |             |   |             |            |             |   |             |             |             |   |             |             |            |   |             |             |             |   |             |            |             |   |            |            |            |   |            |            |            |   |            |            |            |
| H                                                                                                                                                                                                                                                                                                                                                                                                                                                                                                                                                                                                                                                                                                                                                                                                                                                                                                                                                                                                                                                                                                                                                                                                                                                                                                                                                                                                                                                                                                                                                                                                                                                                                                                                                                                                                                                                                                                                                                                                                                                                                                                                                                                                                                                                                                                                               | 5.93032100  | -1.05535800                                                                        | -0.01462700                                                                          |             |   |            |            |             |   |            |             |             |   |            |             |             |   |            |             |             |   |            |             |             |   |            |            |             |   |            |             |             |   |            |             |            |   |            |             |             |   |            |            |             |   |            |             |             |   |            |             |             |   |             |             |             |   |             |             |             |   |             |             |            |   |             |             |             |   |             |             |             |   |             |             |             |   |             |             |             |   |             |             |            |   |             |             |             |   |             |            |             |   |             |             |             |   |             |            |             |   |             |            |             |   |             |             |             |                                                                                                                                                                                                                                                                                                                                                                                                                                                                                                                                                                                                                                                                                                                                                                                                                                                                                                                                                                                                                                                                                                                                                                                                                                                                                                                                                                                                                                                                                                                                                                                                                                                                                                                                                                                                                                                                                                                                                                                                                                                                                                                                                                                                                                                                                                                                                                                                                                                                                                                     |            |             |            |                                                                                                                                                                                                                                                                                                                                                                                                                                                                                                                                                                                                                                                                                                                                                                                                                                                                                                                                                                                                                                                                                                                                                                                                                                                                                                                                                                                                                                                                                                                                                                                                                                                                                                                                                                                                                                                                                                                                                                                                                                                                                                                                                                                                                                                                                                                                                                                                                                                                                                                                                                                               |   |            |             |             |   |            |             |             |   |            |             |             |   |            |             |             |   |            |             |             |   |            |             |             |   |            |             |            |   |            |             |            |   |            |             |             |   |            |             |             |   |            |             |             |   |             |             |             |   |             |             |             |   |             |             |             |   |             |            |             |   |             |             |             |   |             |             |             |   |             |             |             |   |             |            |             |   |             |             |             |   |             |             |             |   |             |             |             |   |             |             |             |   |             |            |             |   |             |             |             |   |             |             |            |   |             |            |             |   |             |             |             |   |             |            |            |                                                                                                                                                                                                                                                                                                                                                                                                                                                                                                                                                                                                                                                                                                                                                                                                                                                                                                                                                                                                                                                                                                                                                                                                                                                                                                                                                                                                                                                                                                                                                                                                                                                                                                                                                                                                                                                                                                                                                                                                                                                                                                                                                                                                                                                                                                                                                                                                                                                                                                                        |            |            |            |             |            |            |            |                                                                                                                                                                                                                                                                                                                                                                                                                                                                                                                                                                                                                                                                                                                                                                                                                                                                                                                                                                                                                                                                                                                                                                                                                                                                                                                                                                                                                                                                                                                                                                                                                                                                                                                                                                                                                                                                                                                                                                                                                                                                                                                                                                                                                                                                                                                                                                                                                                                                                                                                                                                             |   |            |             |             |   |            |             |             |   |            |             |             |   |            |             |             |   |            |             |             |   |            |             |             |   |            |             |            |   |            |             |            |   |            |            |             |   |            |             |             |   |            |             |             |   |             |             |             |   |             |             |             |   |             |            |             |   |             |             |             |   |             |             |             |   |             |            |             |   |             |             |             |   |             |             |             |   |             |             |             |   |             |             |             |   |             |             |             |   |             |             |             |   |             |            |             |   |             |             |             |   |             |             |            |   |             |             |             |   |             |            |             |   |            |            |            |   |            |            |            |   |            |            |            |
| H                                                                                                                                                                                                                                                                                                                                                                                                                                                                                                                                                                                                                                                                                                                                                                                                                                                                                                                                                                                                                                                                                                                                                                                                                                                                                                                                                                                                                                                                                                                                                                                                                                                                                                                                                                                                                                                                                                                                                                                                                                                                                                                                                                                                                                                                                                                                               | 6.12247000  | 1.44048900                                                                         | -0.10180200                                                                          |             |   |            |            |             |   |            |             |             |   |            |             |             |   |            |             |             |   |            |             |             |   |            |            |             |   |            |             |             |   |            |             |            |   |            |             |             |   |            |            |             |   |            |             |             |   |            |             |             |   |             |             |             |   |             |             |             |   |             |             |            |   |             |             |             |   |             |             |             |   |             |             |             |   |             |             |             |   |             |             |            |   |             |             |             |   |             |            |             |   |             |             |             |   |             |            |             |   |             |            |             |   |             |             |             |                                                                                                                                                                                                                                                                                                                                                                                                                                                                                                                                                                                                                                                                                                                                                                                                                                                                                                                                                                                                                                                                                                                                                                                                                                                                                                                                                                                                                                                                                                                                                                                                                                                                                                                                                                                                                                                                                                                                                                                                                                                                                                                                                                                                                                                                                                                                                                                                                                                                                                                     |            |             |            |                                                                                                                                                                                                                                                                                                                                                                                                                                                                                                                                                                                                                                                                                                                                                                                                                                                                                                                                                                                                                                                                                                                                                                                                                                                                                                                                                                                                                                                                                                                                                                                                                                                                                                                                                                                                                                                                                                                                                                                                                                                                                                                                                                                                                                                                                                                                                                                                                                                                                                                                                                                               |   |            |             |             |   |            |             |             |   |            |             |             |   |            |             |             |   |            |             |             |   |            |             |             |   |            |             |            |   |            |             |            |   |            |             |             |   |            |             |             |   |            |             |             |   |             |             |             |   |             |             |             |   |             |             |             |   |             |            |             |   |             |             |             |   |             |             |             |   |             |             |             |   |             |            |             |   |             |             |             |   |             |             |             |   |             |             |             |   |             |             |             |   |             |            |             |   |             |             |             |   |             |             |            |   |             |            |             |   |             |             |             |   |             |            |            |                                                                                                                                                                                                                                                                                                                                                                                                                                                                                                                                                                                                                                                                                                                                                                                                                                                                                                                                                                                                                                                                                                                                                                                                                                                                                                                                                                                                                                                                                                                                                                                                                                                                                                                                                                                                                                                                                                                                                                                                                                                                                                                                                                                                                                                                                                                                                                                                                                                                                                                        |            |            |            |             |            |            |            |                                                                                                                                                                                                                                                                                                                                                                                                                                                                                                                                                                                                                                                                                                                                                                                                                                                                                                                                                                                                                                                                                                                                                                                                                                                                                                                                                                                                                                                                                                                                                                                                                                                                                                                                                                                                                                                                                                                                                                                                                                                                                                                                                                                                                                                                                                                                                                                                                                                                                                                                                                                             |   |            |             |             |   |            |             |             |   |            |             |             |   |            |             |             |   |            |             |             |   |            |             |             |   |            |             |            |   |            |             |            |   |            |            |             |   |            |             |             |   |            |             |             |   |             |             |             |   |             |             |             |   |             |            |             |   |             |             |             |   |             |             |             |   |             |            |             |   |             |             |             |   |             |             |             |   |             |             |             |   |             |             |             |   |             |             |             |   |             |             |             |   |             |            |             |   |             |             |             |   |             |             |            |   |             |             |             |   |             |            |             |   |            |            |            |   |            |            |            |   |            |            |            |
| C                                                                                                                                                                                                                                                                                                                                                                                                                                                                                                                                                                                                                                                                                                                                                                                                                                                                                                                                                                                                                                                                                                                                                                                                                                                                                                                                                                                                                                                                                                                                                                                                                                                                                                                                                                                                                                                                                                                                                                                                                                                                                                                                                                                                                                                                                                                                               | 0.03625100  | -0.37521300                                                                        | 0.04746500                                                                           |             |   |            |            |             |   |            |             |             |   |            |             |             |   |            |             |             |   |            |             |             |   |            |            |             |   |            |             |             |   |            |             |            |   |            |             |             |   |            |            |             |   |            |             |             |   |            |             |             |   |             |             |             |   |             |             |             |   |             |             |            |   |             |             |             |   |             |             |             |   |             |             |             |   |             |             |             |   |             |             |            |   |             |             |             |   |             |            |             |   |             |             |             |   |             |            |             |   |             |            |             |   |             |             |             |                                                                                                                                                                                                                                                                                                                                                                                                                                                                                                                                                                                                                                                                                                                                                                                                                                                                                                                                                                                                                                                                                                                                                                                                                                                                                                                                                                                                                                                                                                                                                                                                                                                                                                                                                                                                                                                                                                                                                                                                                                                                                                                                                                                                                                                                                                                                                                                                                                                                                                                     |            |             |            |                                                                                                                                                                                                                                                                                                                                                                                                                                                                                                                                                                                                                                                                                                                                                                                                                                                                                                                                                                                                                                                                                                                                                                                                                                                                                                                                                                                                                                                                                                                                                                                                                                                                                                                                                                                                                                                                                                                                                                                                                                                                                                                                                                                                                                                                                                                                                                                                                                                                                                                                                                                               |   |            |             |             |   |            |             |             |   |            |             |             |   |            |             |             |   |            |             |             |   |            |             |             |   |            |             |            |   |            |             |            |   |            |             |             |   |            |             |             |   |            |             |             |   |             |             |             |   |             |             |             |   |             |             |             |   |             |            |             |   |             |             |             |   |             |             |             |   |             |             |             |   |             |            |             |   |             |             |             |   |             |             |             |   |             |             |             |   |             |             |             |   |             |            |             |   |             |             |             |   |             |             |            |   |             |            |             |   |             |             |             |   |             |            |            |                                                                                                                                                                                                                                                                                                                                                                                                                                                                                                                                                                                                                                                                                                                                                                                                                                                                                                                                                                                                                                                                                                                                                                                                                                                                                                                                                                                                                                                                                                                                                                                                                                                                                                                                                                                                                                                                                                                                                                                                                                                                                                                                                                                                                                                                                                                                                                                                                                                                                                                        |            |            |            |             |            |            |            |                                                                                                                                                                                                                                                                                                                                                                                                                                                                                                                                                                                                                                                                                                                                                                                                                                                                                                                                                                                                                                                                                                                                                                                                                                                                                                                                                                                                                                                                                                                                                                                                                                                                                                                                                                                                                                                                                                                                                                                                                                                                                                                                                                                                                                                                                                                                                                                                                                                                                                                                                                                             |   |            |             |             |   |            |             |             |   |            |             |             |   |            |             |             |   |            |             |             |   |            |             |             |   |            |             |            |   |            |             |            |   |            |            |             |   |            |             |             |   |            |             |             |   |             |             |             |   |             |             |             |   |             |            |             |   |             |             |             |   |             |             |             |   |             |            |             |   |             |             |             |   |             |             |             |   |             |             |             |   |             |             |             |   |             |             |             |   |             |             |             |   |             |            |             |   |             |             |             |   |             |             |            |   |             |             |             |   |             |            |             |   |            |            |            |   |            |            |            |   |            |            |            |
| C                                                                                                                                                                                                                                                                                                                                                                                                                                                                                                                                                                                                                                                                                                                                                                                                                                                                                                                                                                                                                                                                                                                                                                                                                                                                                                                                                                                                                                                                                                                                                                                                                                                                                                                                                                                                                                                                                                                                                                                                                                                                                                                                                                                                                                                                                                                                               | 0.01008100  | 0.70667700                                                                         | -0.00533700                                                                          |             |   |            |            |             |   |            |             |             |   |            |             |             |   |            |             |             |   |            |             |             |   |            |            |             |   |            |             |             |   |            |             |            |   |            |             |             |   |            |            |             |   |            |             |             |   |            |             |             |   |             |             |             |   |             |             |             |   |             |             |            |   |             |             |             |   |             |             |             |   |             |             |             |   |             |             |             |   |             |             |            |   |             |             |             |   |             |            |             |   |             |             |             |   |             |            |             |   |             |            |             |   |             |             |             |                                                                                                                                                                                                                                                                                                                                                                                                                                                                                                                                                                                                                                                                                                                                                                                                                                                                                                                                                                                                                                                                                                                                                                                                                                                                                                                                                                                                                                                                                                                                                                                                                                                                                                                                                                                                                                                                                                                                                                                                                                                                                                                                                                                                                                                                                                                                                                                                                                                                                                                     |            |             |            |                                                                                                                                                                                                                                                                                                                                                                                                                                                                                                                                                                                                                                                                                                                                                                                                                                                                                                                                                                                                                                                                                                                                                                                                                                                                                                                                                                                                                                                                                                                                                                                                                                                                                                                                                                                                                                                                                                                                                                                                                                                                                                                                                                                                                                                                                                                                                                                                                                                                                                                                                                                               |   |            |             |             |   |            |             |             |   |            |             |             |   |            |             |             |   |            |             |             |   |            |             |             |   |            |             |            |   |            |             |            |   |            |             |             |   |            |             |             |   |            |             |             |   |             |             |             |   |             |             |             |   |             |             |             |   |             |            |             |   |             |             |             |   |             |             |             |   |             |             |             |   |             |            |             |   |             |             |             |   |             |             |             |   |             |             |             |   |             |             |             |   |             |            |             |   |             |             |             |   |             |             |            |   |             |            |             |   |             |             |             |   |             |            |            |                                                                                                                                                                                                                                                                                                                                                                                                                                                                                                                                                                                                                                                                                                                                                                                                                                                                                                                                                                                                                                                                                                                                                                                                                                                                                                                                                                                                                                                                                                                                                                                                                                                                                                                                                                                                                                                                                                                                                                                                                                                                                                                                                                                                                                                                                                                                                                                                                                                                                                                        |            |            |            |             |            |            |            |                                                                                                                                                                                                                                                                                                                                                                                                                                                                                                                                                                                                                                                                                                                                                                                                                                                                                                                                                                                                                                                                                                                                                                                                                                                                                                                                                                                                                                                                                                                                                                                                                                                                                                                                                                                                                                                                                                                                                                                                                                                                                                                                                                                                                                                                                                                                                                                                                                                                                                                                                                                             |   |            |             |             |   |            |             |             |   |            |             |             |   |            |             |             |   |            |             |             |   |            |             |             |   |            |             |            |   |            |             |            |   |            |            |             |   |            |             |             |   |            |             |             |   |             |             |             |   |             |             |             |   |             |            |             |   |             |             |             |   |             |             |             |   |             |            |             |   |             |             |             |   |             |             |             |   |             |             |             |   |             |             |             |   |             |             |             |   |             |             |             |   |             |            |             |   |             |             |             |   |             |             |            |   |             |             |             |   |             |            |             |   |            |            |            |   |            |            |            |   |            |            |            |
| C                                                                                                                                                                                                                                                                                                                                                                                                                                                                                                                                                                                                                                                                                                                                                                                                                                                                                                                                                                                                                                                                                                                                                                                                                                                                                                                                                                                                                                                                                                                                                                                                                                                                                                                                                                                                                                                                                                                                                                                                                                                                                                                                                                                                                                                                                                                                               | -1.17541000 | -1.03635700                                                                        | 0.08250400                                                                           |             |   |            |            |             |   |            |             |             |   |            |             |             |   |            |             |             |   |            |             |             |   |            |            |             |   |            |             |             |   |            |             |            |   |            |             |             |   |            |            |             |   |            |             |             |   |            |             |             |   |             |             |             |   |             |             |             |   |             |             |            |   |             |             |             |   |             |             |             |   |             |             |             |   |             |             |             |   |             |             |            |   |             |             |             |   |             |            |             |   |             |             |             |   |             |            |             |   |             |            |             |   |             |             |             |                                                                                                                                                                                                                                                                                                                                                                                                                                                                                                                                                                                                                                                                                                                                                                                                                                                                                                                                                                                                                                                                                                                                                                                                                                                                                                                                                                                                                                                                                                                                                                                                                                                                                                                                                                                                                                                                                                                                                                                                                                                                                                                                                                                                                                                                                                                                                                                                                                                                                                                     |            |             |            |                                                                                                                                                                                                                                                                                                                                                                                                                                                                                                                                                                                                                                                                                                                                                                                                                                                                                                                                                                                                                                                                                                                                                                                                                                                                                                                                                                                                                                                                                                                                                                                                                                                                                                                                                                                                                                                                                                                                                                                                                                                                                                                                                                                                                                                                                                                                                                                                                                                                                                                                                                                               |   |            |             |             |   |            |             |             |   |            |             |             |   |            |             |             |   |            |             |             |   |            |             |             |   |            |             |            |   |            |             |            |   |            |             |             |   |            |             |             |   |            |             |             |   |             |             |             |   |             |             |             |   |             |             |             |   |             |            |             |   |             |             |             |   |             |             |             |   |             |             |             |   |             |            |             |   |             |             |             |   |             |             |             |   |             |             |             |   |             |             |             |   |             |            |             |   |             |             |             |   |             |             |            |   |             |            |             |   |             |             |             |   |             |            |            |                                                                                                                                                                                                                                                                                                                                                                                                                                                                                                                                                                                                                                                                                                                                                                                                                                                                                                                                                                                                                                                                                                                                                                                                                                                                                                                                                                                                                                                                                                                                                                                                                                                                                                                                                                                                                                                                                                                                                                                                                                                                                                                                                                                                                                                                                                                                                                                                                                                                                                                        |            |            |            |             |            |            |            |                                                                                                                                                                                                                                                                                                                                                                                                                                                                                                                                                                                                                                                                                                                                                                                                                                                                                                                                                                                                                                                                                                                                                                                                                                                                                                                                                                                                                                                                                                                                                                                                                                                                                                                                                                                                                                                                                                                                                                                                                                                                                                                                                                                                                                                                                                                                                                                                                                                                                                                                                                                             |   |            |             |             |   |            |             |             |   |            |             |             |   |            |             |             |   |            |             |             |   |            |             |             |   |            |             |            |   |            |             |            |   |            |            |             |   |            |             |             |   |            |             |             |   |             |             |             |   |             |             |             |   |             |            |             |   |             |             |             |   |             |             |             |   |             |            |             |   |             |             |             |   |             |             |             |   |             |             |             |   |             |             |             |   |             |             |             |   |             |             |             |   |             |            |             |   |             |             |             |   |             |             |            |   |             |             |             |   |             |            |             |   |            |            |            |   |            |            |            |   |            |            |            |
| O                                                                                                                                                                                                                                                                                                                                                                                                                                                                                                                                                                                                                                                                                                                                                                                                                                                                                                                                                                                                                                                                                                                                                                                                                                                                                                                                                                                                                                                                                                                                                                                                                                                                                                                                                                                                                                                                                                                                                                                                                                                                                                                                                                                                                                                                                                                                               | -3.70785000 | -2.33229900                                                                        | 0.11500300                                                                           |             |   |            |            |             |   |            |             |             |   |            |             |             |   |            |             |             |   |            |             |             |   |            |            |             |   |            |             |             |   |            |             |            |   |            |             |             |   |            |            |             |   |            |             |             |   |            |             |             |   |             |             |             |   |             |             |             |   |             |             |            |   |             |             |             |   |             |             |             |   |             |             |             |   |             |             |             |   |             |             |            |   |             |             |             |   |             |            |             |   |             |             |             |   |             |            |             |   |             |            |             |   |             |             |             |                                                                                                                                                                                                                                                                                                                                                                                                                                                                                                                                                                                                                                                                                                                                                                                                                                                                                                                                                                                                                                                                                                                                                                                                                                                                                                                                                                                                                                                                                                                                                                                                                                                                                                                                                                                                                                                                                                                                                                                                                                                                                                                                                                                                                                                                                                                                                                                                                                                                                                                     |            |             |            |                                                                                                                                                                                                                                                                                                                                                                                                                                                                                                                                                                                                                                                                                                                                                                                                                                                                                                                                                                                                                                                                                                                                                                                                                                                                                                                                                                                                                                                                                                                                                                                                                                                                                                                                                                                                                                                                                                                                                                                                                                                                                                                                                                                                                                                                                                                                                                                                                                                                                                                                                                                               |   |            |             |             |   |            |             |             |   |            |             |             |   |            |             |             |   |            |             |             |   |            |             |             |   |            |             |            |   |            |             |            |   |            |             |             |   |            |             |             |   |            |             |             |   |             |             |             |   |             |             |             |   |             |             |             |   |             |            |             |   |             |             |             |   |             |             |             |   |             |             |             |   |             |            |             |   |             |             |             |   |             |             |             |   |             |             |             |   |             |             |             |   |             |            |             |   |             |             |             |   |             |             |            |   |             |            |             |   |             |             |             |   |             |            |            |                                                                                                                                                                                                                                                                                                                                                                                                                                                                                                                                                                                                                                                                                                                                                                                                                                                                                                                                                                                                                                                                                                                                                                                                                                                                                                                                                                                                                                                                                                                                                                                                                                                                                                                                                                                                                                                                                                                                                                                                                                                                                                                                                                                                                                                                                                                                                                                                                                                                                                                        |            |            |            |             |            |            |            |                                                                                                                                                                                                                                                                                                                                                                                                                                                                                                                                                                                                                                                                                                                                                                                                                                                                                                                                                                                                                                                                                                                                                                                                                                                                                                                                                                                                                                                                                                                                                                                                                                                                                                                                                                                                                                                                                                                                                                                                                                                                                                                                                                                                                                                                                                                                                                                                                                                                                                                                                                                             |   |            |             |             |   |            |             |             |   |            |             |             |   |            |             |             |   |            |             |             |   |            |             |             |   |            |             |            |   |            |             |            |   |            |            |             |   |            |             |             |   |            |             |             |   |             |             |             |   |             |             |             |   |             |            |             |   |             |             |             |   |             |             |             |   |             |            |             |   |             |             |             |   |             |             |             |   |             |             |             |   |             |             |             |   |             |             |             |   |             |             |             |   |             |            |             |   |             |             |             |   |             |             |            |   |             |             |             |   |             |            |             |   |            |            |            |   |            |            |            |   |            |            |            |
| C                                                                                                                                                                                                                                                                                                                                                                                                                                                                                                                                                                                                                                                                                                                                                                                                                                                                                                                                                                                                                                                                                                                                                                                                                                                                                                                                                                                                                                                                                                                                                                                                                                                                                                                                                                                                                                                                                                                                                                                                                                                                                                                                                                                                                                                                                                                                               | -2.43464000 | -0.23148300                                                                        | 0.03905100                                                                           |             |   |            |            |             |   |            |             |             |   |            |             |             |   |            |             |             |   |            |             |             |   |            |            |             |   |            |             |             |   |            |             |            |   |            |             |             |   |            |            |             |   |            |             |             |   |            |             |             |   |             |             |             |   |             |             |             |   |             |             |            |   |             |             |             |   |             |             |             |   |             |             |             |   |             |             |             |   |             |             |            |   |             |             |             |   |             |            |             |   |             |             |             |   |             |            |             |   |             |            |             |   |             |             |             |                                                                                                                                                                                                                                                                                                                                                                                                                                                                                                                                                                                                                                                                                                                                                                                                                                                                                                                                                                                                                                                                                                                                                                                                                                                                                                                                                                                                                                                                                                                                                                                                                                                                                                                                                                                                                                                                                                                                                                                                                                                                                                                                                                                                                                                                                                                                                                                                                                                                                                                     |            |             |            |                                                                                                                                                                                                                                                                                                                                                                                                                                                                                                                                                                                                                                                                                                                                                                                                                                                                                                                                                                                                                                                                                                                                                                                                                                                                                                                                                                                                                                                                                                                                                                                                                                                                                                                                                                                                                                                                                                                                                                                                                                                                                                                                                                                                                                                                                                                                                                                                                                                                                                                                                                                               |   |            |             |             |   |            |             |             |   |            |             |             |   |            |             |             |   |            |             |             |   |            |             |             |   |            |             |            |   |            |             |            |   |            |             |             |   |            |             |             |   |            |             |             |   |             |             |             |   |             |             |             |   |             |             |             |   |             |            |             |   |             |             |             |   |             |             |             |   |             |             |             |   |             |            |             |   |             |             |             |   |             |             |             |   |             |             |             |   |             |             |             |   |             |            |             |   |             |             |             |   |             |             |            |   |             |            |             |   |             |             |             |   |             |            |            |                                                                                                                                                                                                                                                                                                                                                                                                                                                                                                                                                                                                                                                                                                                                                                                                                                                                                                                                                                                                                                                                                                                                                                                                                                                                                                                                                                                                                                                                                                                                                                                                                                                                                                                                                                                                                                                                                                                                                                                                                                                                                                                                                                                                                                                                                                                                                                                                                                                                                                                        |            |            |            |             |            |            |            |                                                                                                                                                                                                                                                                                                                                                                                                                                                                                                                                                                                                                                                                                                                                                                                                                                                                                                                                                                                                                                                                                                                                                                                                                                                                                                                                                                                                                                                                                                                                                                                                                                                                                                                                                                                                                                                                                                                                                                                                                                                                                                                                                                                                                                                                                                                                                                                                                                                                                                                                                                                             |   |            |             |             |   |            |             |             |   |            |             |             |   |            |             |             |   |            |             |             |   |            |             |             |   |            |             |            |   |            |             |            |   |            |            |             |   |            |             |             |   |            |             |             |   |             |             |             |   |             |             |             |   |             |            |             |   |             |             |             |   |             |             |             |   |             |            |             |   |             |             |             |   |             |             |             |   |             |             |             |   |             |             |             |   |             |             |             |   |             |             |             |   |             |            |             |   |             |             |             |   |             |             |            |   |             |             |             |   |             |            |             |   |            |            |            |   |            |            |            |   |            |            |            |
| C                                                                                                                                                                                                                                                                                                                                                                                                                                                                                                                                                                                                                                                                                                                                                                                                                                                                                                                                                                                                                                                                                                                                                                                                                                                                                                                                                                                                                                                                                                                                                                                                                                                                                                                                                                                                                                                                                                                                                                                                                                                                                                                                                                                                                                                                                                                                               | -3.65276900 | -0.90236200                                                                        | -0.15815000                                                                          |             |   |            |            |             |   |            |             |             |   |            |             |             |   |            |             |             |   |            |             |             |   |            |            |             |   |            |             |             |   |            |             |            |   |            |             |             |   |            |            |             |   |            |             |             |   |            |             |             |   |             |             |             |   |             |             |             |   |             |             |            |   |             |             |             |   |             |             |             |   |             |             |             |   |             |             |             |   |             |             |            |   |             |             |             |   |             |            |             |   |             |             |             |   |             |            |             |   |             |            |             |   |             |             |             |                                                                                                                                                                                                                                                                                                                                                                                                                                                                                                                                                                                                                                                                                                                                                                                                                                                                                                                                                                                                                                                                                                                                                                                                                                                                                                                                                                                                                                                                                                                                                                                                                                                                                                                                                                                                                                                                                                                                                                                                                                                                                                                                                                                                                                                                                                                                                                                                                                                                                                                     |            |             |            |                                                                                                                                                                                                                                                                                                                                                                                                                                                                                                                                                                                                                                                                                                                                                                                                                                                                                                                                                                                                                                                                                                                                                                                                                                                                                                                                                                                                                                                                                                                                                                                                                                                                                                                                                                                                                                                                                                                                                                                                                                                                                                                                                                                                                                                                                                                                                                                                                                                                                                                                                                                               |   |            |             |             |   |            |             |             |   |            |             |             |   |            |             |             |   |            |             |             |   |            |             |             |   |            |             |            |   |            |             |            |   |            |             |             |   |            |             |             |   |            |             |             |   |             |             |             |   |             |             |             |   |             |             |             |   |             |            |             |   |             |             |             |   |             |             |             |   |             |             |             |   |             |            |             |   |             |             |             |   |             |             |             |   |             |             |             |   |             |             |             |   |             |            |             |   |             |             |             |   |             |             |            |   |             |            |             |   |             |             |             |   |             |            |            |                                                                                                                                                                                                                                                                                                                                                                                                                                                                                                                                                                                                                                                                                                                                                                                                                                                                                                                                                                                                                                                                                                                                                                                                                                                                                                                                                                                                                                                                                                                                                                                                                                                                                                                                                                                                                                                                                                                                                                                                                                                                                                                                                                                                                                                                                                                                                                                                                                                                                                                        |            |            |            |             |            |            |            |                                                                                                                                                                                                                                                                                                                                                                                                                                                                                                                                                                                                                                                                                                                                                                                                                                                                                                                                                                                                                                                                                                                                                                                                                                                                                                                                                                                                                                                                                                                                                                                                                                                                                                                                                                                                                                                                                                                                                                                                                                                                                                                                                                                                                                                                                                                                                                                                                                                                                                                                                                                             |   |            |             |             |   |            |             |             |   |            |             |             |   |            |             |             |   |            |             |             |   |            |             |             |   |            |             |            |   |            |             |            |   |            |            |             |   |            |             |             |   |            |             |             |   |             |             |             |   |             |             |             |   |             |            |             |   |             |             |             |   |             |             |             |   |             |            |             |   |             |             |             |   |             |             |             |   |             |             |             |   |             |             |             |   |             |             |             |   |             |             |             |   |             |            |             |   |             |             |             |   |             |             |            |   |             |             |             |   |             |            |             |   |            |            |            |   |            |            |            |   |            |            |            |
| C                                                                                                                                                                                                                                                                                                                                                                                                                                                                                                                                                                                                                                                                                                                                                                                                                                                                                                                                                                                                                                                                                                                                                                                                                                                                                                                                                                                                                                                                                                                                                                                                                                                                                                                                                                                                                                                                                                                                                                                                                                                                                                                                                                                                                                                                                                                                               | -2.51548200 | 1.16594700                                                                         | 0.19571000                                                                           |             |   |            |            |             |   |            |             |             |   |            |             |             |   |            |             |             |   |            |             |             |   |            |            |             |   |            |             |             |   |            |             |            |   |            |             |             |   |            |            |             |   |            |             |             |   |            |             |             |   |             |             |             |   |             |             |             |   |             |             |            |   |             |             |             |   |             |             |             |   |             |             |             |   |             |             |             |   |             |             |            |   |             |             |             |   |             |            |             |   |             |             |             |   |             |            |             |   |             |            |             |   |             |             |             |                                                                                                                                                                                                                                                                                                                                                                                                                                                                                                                                                                                                                                                                                                                                                                                                                                                                                                                                                                                                                                                                                                                                                                                                                                                                                                                                                                                                                                                                                                                                                                                                                                                                                                                                                                                                                                                                                                                                                                                                                                                                                                                                                                                                                                                                                                                                                                                                                                                                                                                     |            |             |            |                                                                                                                                                                                                                                                                                                                                                                                                                                                                                                                                                                                                                                                                                                                                                                                                                                                                                                                                                                                                                                                                                                                                                                                                                                                                                                                                                                                                                                                                                                                                                                                                                                                                                                                                                                                                                                                                                                                                                                                                                                                                                                                                                                                                                                                                                                                                                                                                                                                                                                                                                                                               |   |            |             |             |   |            |             |             |   |            |             |             |   |            |             |             |   |            |             |             |   |            |             |             |   |            |             |            |   |            |             |            |   |            |             |             |   |            |             |             |   |            |             |             |   |             |             |             |   |             |             |             |   |             |             |             |   |             |            |             |   |             |             |             |   |             |             |             |   |             |             |             |   |             |            |             |   |             |             |             |   |             |             |             |   |             |             |             |   |             |             |             |   |             |            |             |   |             |             |             |   |             |             |            |   |             |            |             |   |             |             |             |   |             |            |            |                                                                                                                                                                                                                                                                                                                                                                                                                                                                                                                                                                                                                                                                                                                                                                                                                                                                                                                                                                                                                                                                                                                                                                                                                                                                                                                                                                                                                                                                                                                                                                                                                                                                                                                                                                                                                                                                                                                                                                                                                                                                                                                                                                                                                                                                                                                                                                                                                                                                                                                        |            |            |            |             |            |            |            |                                                                                                                                                                                                                                                                                                                                                                                                                                                                                                                                                                                                                                                                                                                                                                                                                                                                                                                                                                                                                                                                                                                                                                                                                                                                                                                                                                                                                                                                                                                                                                                                                                                                                                                                                                                                                                                                                                                                                                                                                                                                                                                                                                                                                                                                                                                                                                                                                                                                                                                                                                                             |   |            |             |             |   |            |             |             |   |            |             |             |   |            |             |             |   |            |             |             |   |            |             |             |   |            |             |            |   |            |             |            |   |            |            |             |   |            |             |             |   |            |             |             |   |             |             |             |   |             |             |             |   |             |            |             |   |             |             |             |   |             |             |             |   |             |            |             |   |             |             |             |   |             |             |             |   |             |             |             |   |             |             |             |   |             |             |             |   |             |             |             |   |             |            |             |   |             |             |             |   |             |             |            |   |             |             |             |   |             |            |             |   |            |            |            |   |            |            |            |   |            |            |            |
| H                                                                                                                                                                                                                                                                                                                                                                                                                                                                                                                                                                                                                                                                                                                                                                                                                                                                                                                                                                                                                                                                                                                                                                                                                                                                                                                                                                                                                                                                                                                                                                                                                                                                                                                                                                                                                                                                                                                                                                                                                                                                                                                                                                                                                                                                                                                                               | -4.86467400 | -0.22811500                                                                        | -0.21869400                                                                          |             |   |            |            |             |   |            |             |             |   |            |             |             |   |            |             |             |   |            |             |             |   |            |            |             |   |            |             |             |   |            |             |            |   |            |             |             |   |            |            |             |   |            |             |             |   |            |             |             |   |             |             |             |   |             |             |             |   |             |             |            |   |             |             |             |   |             |             |             |   |             |             |             |   |             |             |             |   |             |             |            |   |             |             |             |   |             |            |             |   |             |             |             |   |             |            |             |   |             |            |             |   |             |             |             |                                                                                                                                                                                                                                                                                                                                                                                                                                                                                                                                                                                                                                                                                                                                                                                                                                                                                                                                                                                                                                                                                                                                                                                                                                                                                                                                                                                                                                                                                                                                                                                                                                                                                                                                                                                                                                                                                                                                                                                                                                                                                                                                                                                                                                                                                                                                                                                                                                                                                                                     |            |             |            |                                                                                                                                                                                                                                                                                                                                                                                                                                                                                                                                                                                                                                                                                                                                                                                                                                                                                                                                                                                                                                                                                                                                                                                                                                                                                                                                                                                                                                                                                                                                                                                                                                                                                                                                                                                                                                                                                                                                                                                                                                                                                                                                                                                                                                                                                                                                                                                                                                                                                                                                                                                               |   |            |             |             |   |            |             |             |   |            |             |             |   |            |             |             |   |            |             |             |   |            |             |             |   |            |             |            |   |            |             |            |   |            |             |             |   |            |             |             |   |            |             |             |   |             |             |             |   |             |             |             |   |             |             |             |   |             |            |             |   |             |             |             |   |             |             |             |   |             |             |             |   |             |            |             |   |             |             |             |   |             |             |             |   |             |             |             |   |             |             |             |   |             |            |             |   |             |             |             |   |             |             |            |   |             |            |             |   |             |             |             |   |             |            |            |                                                                                                                                                                                                                                                                                                                                                                                                                                                                                                                                                                                                                                                                                                                                                                                                                                                                                                                                                                                                                                                                                                                                                                                                                                                                                                                                                                                                                                                                                                                                                                                                                                                                                                                                                                                                                                                                                                                                                                                                                                                                                                                                                                                                                                                                                                                                                                                                                                                                                                                        |            |            |            |             |            |            |            |                                                                                                                                                                                                                                                                                                                                                                                                                                                                                                                                                                                                                                                                                                                                                                                                                                                                                                                                                                                                                                                                                                                                                                                                                                                                                                                                                                                                                                                                                                                                                                                                                                                                                                                                                                                                                                                                                                                                                                                                                                                                                                                                                                                                                                                                                                                                                                                                                                                                                                                                                                                             |   |            |             |             |   |            |             |             |   |            |             |             |   |            |             |             |   |            |             |             |   |            |             |             |   |            |             |            |   |            |             |            |   |            |            |             |   |            |             |             |   |            |             |             |   |             |             |             |   |             |             |             |   |             |            |             |   |             |             |             |   |             |             |             |   |             |            |             |   |             |             |             |   |             |             |             |   |             |             |             |   |             |             |             |   |             |             |             |   |             |             |             |   |             |            |             |   |             |             |             |   |             |             |            |   |             |             |             |   |             |            |             |   |            |            |            |   |            |            |            |   |            |            |            |
| C                                                                                                                                                                                                                                                                                                                                                                                                                                                                                                                                                                                                                                                                                                                                                                                                                                                                                                                                                                                                                                                                                                                                                                                                                                                                                                                                                                                                                                                                                                                                                                                                                                                                                                                                                                                                                                                                                                                                                                                                                                                                                                                                                                                                                                                                                                                                               | -3.61652300 | -1.97845600                                                                        | -0.26384900                                                                          |             |   |            |            |             |   |            |             |             |   |            |             |             |   |            |             |             |   |            |             |             |   |            |            |             |   |            |             |             |   |            |             |            |   |            |             |             |   |            |            |             |   |            |             |             |   |            |             |             |   |             |             |             |   |             |             |             |   |             |             |            |   |             |             |             |   |             |             |             |   |             |             |             |   |             |             |             |   |             |             |            |   |             |             |             |   |             |            |             |   |             |             |             |   |             |            |             |   |             |            |             |   |             |             |             |                                                                                                                                                                                                                                                                                                                                                                                                                                                                                                                                                                                                                                                                                                                                                                                                                                                                                                                                                                                                                                                                                                                                                                                                                                                                                                                                                                                                                                                                                                                                                                                                                                                                                                                                                                                                                                                                                                                                                                                                                                                                                                                                                                                                                                                                                                                                                                                                                                                                                                                     |            |             |            |                                                                                                                                                                                                                                                                                                                                                                                                                                                                                                                                                                                                                                                                                                                                                                                                                                                                                                                                                                                                                                                                                                                                                                                                                                                                                                                                                                                                                                                                                                                                                                                                                                                                                                                                                                                                                                                                                                                                                                                                                                                                                                                                                                                                                                                                                                                                                                                                                                                                                                                                                                                               |   |            |             |             |   |            |             |             |   |            |             |             |   |            |             |             |   |            |             |             |   |            |             |             |   |            |             |            |   |            |             |            |   |            |             |             |   |            |             |             |   |            |             |             |   |             |             |             |   |             |             |             |   |             |             |             |   |             |            |             |   |             |             |             |   |             |             |             |   |             |             |             |   |             |            |             |   |             |             |             |   |             |             |             |   |             |             |             |   |             |             |             |   |             |            |             |   |             |             |             |   |             |             |            |   |             |            |             |   |             |             |             |   |             |            |            |                                                                                                                                                                                                                                                                                                                                                                                                                                                                                                                                                                                                                                                                                                                                                                                                                                                                                                                                                                                                                                                                                                                                                                                                                                                                                                                                                                                                                                                                                                                                                                                                                                                                                                                                                                                                                                                                                                                                                                                                                                                                                                                                                                                                                                                                                                                                                                                                                                                                                                                        |            |            |            |             |            |            |            |                                                                                                                                                                                                                                                                                                                                                                                                                                                                                                                                                                                                                                                                                                                                                                                                                                                                                                                                                                                                                                                                                                                                                                                                                                                                                                                                                                                                                                                                                                                                                                                                                                                                                                                                                                                                                                                                                                                                                                                                                                                                                                                                                                                                                                                                                                                                                                                                                                                                                                                                                                                             |   |            |             |             |   |            |             |             |   |            |             |             |   |            |             |             |   |            |             |             |   |            |             |             |   |            |             |            |   |            |             |            |   |            |            |             |   |            |             |             |   |            |             |             |   |             |             |             |   |             |             |             |   |             |            |             |   |             |             |             |   |             |             |             |   |             |            |             |   |             |             |             |   |             |             |             |   |             |             |             |   |             |             |             |   |             |             |             |   |             |             |             |   |             |            |             |   |             |             |             |   |             |             |            |   |             |             |             |   |             |            |             |   |            |            |            |   |            |            |            |   |            |            |            |
| C                                                                                                                                                                                                                                                                                                                                                                                                                                                                                                                                                                                                                                                                                                                                                                                                                                                                                                                                                                                                                                                                                                                                                                                                                                                                                                                                                                                                                                                                                                                                                                                                                                                                                                                                                                                                                                                                                                                                                                                                                                                                                                                                                                                                                                                                                                                                               | -3.72210100 | 1.83895500                                                                         | 0.13712600                                                                           |             |   |            |            |             |   |            |             |             |   |            |             |             |   |            |             |             |   |            |             |             |   |            |            |             |   |            |             |             |   |            |             |            |   |            |             |             |   |            |            |             |   |            |             |             |   |            |             |             |   |             |             |             |   |             |             |             |   |             |             |            |   |             |             |             |   |             |             |             |   |             |             |             |   |             |             |             |   |             |             |            |   |             |             |             |   |             |            |             |   |             |             |             |   |             |            |             |   |             |            |             |   |             |             |             |                                                                                                                                                                                                                                                                                                                                                                                                                                                                                                                                                                                                                                                                                                                                                                                                                                                                                                                                                                                                                                                                                                                                                                                                                                                                                                                                                                                                                                                                                                                                                                                                                                                                                                                                                                                                                                                                                                                                                                                                                                                                                                                                                                                                                                                                                                                                                                                                                                                                                                                     |            |             |            |                                                                                                                                                                                                                                                                                                                                                                                                                                                                                                                                                                                                                                                                                                                                                                                                                                                                                                                                                                                                                                                                                                                                                                                                                                                                                                                                                                                                                                                                                                                                                                                                                                                                                                                                                                                                                                                                                                                                                                                                                                                                                                                                                                                                                                                                                                                                                                                                                                                                                                                                                                                               |   |            |             |             |   |            |             |             |   |            |             |             |   |            |             |             |   |            |             |             |   |            |             |             |   |            |             |            |   |            |             |            |   |            |             |             |   |            |             |             |   |            |             |             |   |             |             |             |   |             |             |             |   |             |             |             |   |             |            |             |   |             |             |             |   |             |             |             |   |             |             |             |   |             |            |             |   |             |             |             |   |             |             |             |   |             |             |             |   |             |             |             |   |             |            |             |   |             |             |             |   |             |             |            |   |             |            |             |   |             |             |             |   |             |            |            |                                                                                                                                                                                                                                                                                                                                                                                                                                                                                                                                                                                                                                                                                                                                                                                                                                                                                                                                                                                                                                                                                                                                                                                                                                                                                                                                                                                                                                                                                                                                                                                                                                                                                                                                                                                                                                                                                                                                                                                                                                                                                                                                                                                                                                                                                                                                                                                                                                                                                                                        |            |            |            |             |            |            |            |                                                                                                                                                                                                                                                                                                                                                                                                                                                                                                                                                                                                                                                                                                                                                                                                                                                                                                                                                                                                                                                                                                                                                                                                                                                                                                                                                                                                                                                                                                                                                                                                                                                                                                                                                                                                                                                                                                                                                                                                                                                                                                                                                                                                                                                                                                                                                                                                                                                                                                                                                                                             |   |            |             |             |   |            |             |             |   |            |             |             |   |            |             |             |   |            |             |             |   |            |             |             |   |            |             |            |   |            |             |            |   |            |            |             |   |            |             |             |   |            |             |             |   |             |             |             |   |             |             |             |   |             |            |             |   |             |             |             |   |             |             |             |   |             |            |             |   |             |             |             |   |             |             |             |   |             |             |             |   |             |             |             |   |             |             |             |   |             |             |             |   |             |            |             |   |             |             |             |   |             |             |            |   |             |             |             |   |             |            |             |   |            |            |            |   |            |            |            |   |            |            |            |
| H                                                                                                                                                                                                                                                                                                                                                                                                                                                                                                                                                                                                                                                                                                                                                                                                                                                                                                                                                                                                                                                                                                                                                                                                                                                                                                                                                                                                                                                                                                                                                                                                                                                                                                                                                                                                                                                                                                                                                                                                                                                                                                                                                                                                                                                                                                                                               | -1.61721500 | 1.74061200                                                                         | 0.38294400                                                                           |             |   |            |            |             |   |            |             |             |   |            |             |             |   |            |             |             |   |            |             |             |   |            |            |             |   |            |             |             |   |            |             |            |   |            |             |             |   |            |            |             |   |            |             |             |   |            |             |             |   |             |             |             |   |             |             |             |   |             |             |            |   |             |             |             |   |             |             |             |   |             |             |             |   |             |             |             |   |             |             |            |   |             |             |             |   |             |            |             |   |             |             |             |   |             |            |             |   |             |            |             |   |             |             |             |                                                                                                                                                                                                                                                                                                                                                                                                                                                                                                                                                                                                                                                                                                                                                                                                                                                                                                                                                                                                                                                                                                                                                                                                                                                                                                                                                                                                                                                                                                                                                                                                                                                                                                                                                                                                                                                                                                                                                                                                                                                                                                                                                                                                                                                                                                                                                                                                                                                                                                                     |            |             |            |                                                                                                                                                                                                                                                                                                                                                                                                                                                                                                                                                                                                                                                                                                                                                                                                                                                                                                                                                                                                                                                                                                                                                                                                                                                                                                                                                                                                                                                                                                                                                                                                                                                                                                                                                                                                                                                                                                                                                                                                                                                                                                                                                                                                                                                                                                                                                                                                                                                                                                                                                                                               |   |            |             |             |   |            |             |             |   |            |             |             |   |            |             |             |   |            |             |             |   |            |             |             |   |            |             |            |   |            |             |            |   |            |             |             |   |            |             |             |   |            |             |             |   |             |             |             |   |             |             |             |   |             |             |             |   |             |            |             |   |             |             |             |   |             |             |             |   |             |             |             |   |             |            |             |   |             |             |             |   |             |             |             |   |             |             |             |   |             |             |             |   |             |            |             |   |             |             |             |   |             |             |            |   |             |            |             |   |             |             |             |   |             |            |            |                                                                                                                                                                                                                                                                                                                                                                                                                                                                                                                                                                                                                                                                                                                                                                                                                                                                                                                                                                                                                                                                                                                                                                                                                                                                                                                                                                                                                                                                                                                                                                                                                                                                                                                                                                                                                                                                                                                                                                                                                                                                                                                                                                                                                                                                                                                                                                                                                                                                                                                        |            |            |            |             |            |            |            |                                                                                                                                                                                                                                                                                                                                                                                                                                                                                                                                                                                                                                                                                                                                                                                                                                                                                                                                                                                                                                                                                                                                                                                                                                                                                                                                                                                                                                                                                                                                                                                                                                                                                                                                                                                                                                                                                                                                                                                                                                                                                                                                                                                                                                                                                                                                                                                                                                                                                                                                                                                             |   |            |             |             |   |            |             |             |   |            |             |             |   |            |             |             |   |            |             |             |   |            |             |             |   |            |             |            |   |            |             |            |   |            |            |             |   |            |             |             |   |            |             |             |   |             |             |             |   |             |             |             |   |             |            |             |   |             |             |             |   |             |             |             |   |             |            |             |   |             |             |             |   |             |             |             |   |             |             |             |   |             |             |             |   |             |             |             |   |             |             |             |   |             |            |             |   |             |             |             |   |             |             |            |   |             |             |             |   |             |            |             |   |            |            |            |   |            |            |            |   |            |            |            |
| C                                                                                                                                                                                                                                                                                                                                                                                                                                                                                                                                                                                                                                                                                                                                                                                                                                                                                                                                                                                                                                                                                                                                                                                                                                                                                                                                                                                                                                                                                                                                                                                                                                                                                                                                                                                                                                                                                                                                                                                                                                                                                                                                                                                                                                                                                                                                               | -4.91563100 | 1.15069600                                                                         | -0.07499000                                                                          |             |   |            |            |             |   |            |             |             |   |            |             |             |   |            |             |             |   |            |             |             |   |            |            |             |   |            |             |             |   |            |             |            |   |            |             |             |   |            |            |             |   |            |             |             |   |            |             |             |   |             |             |             |   |             |             |             |   |             |             |            |   |             |             |             |   |             |             |             |   |             |             |             |   |             |             |             |   |             |             |            |   |             |             |             |   |             |            |             |   |             |             |             |   |             |            |             |   |             |            |             |   |             |             |             |                                                                                                                                                                                                                                                                                                                                                                                                                                                                                                                                                                                                                                                                                                                                                                                                                                                                                                                                                                                                                                                                                                                                                                                                                                                                                                                                                                                                                                                                                                                                                                                                                                                                                                                                                                                                                                                                                                                                                                                                                                                                                                                                                                                                                                                                                                                                                                                                                                                                                                                     |            |             |            |                                                                                                                                                                                                                                                                                                                                                                                                                                                                                                                                                                                                                                                                                                                                                                                                                                                                                                                                                                                                                                                                                                                                                                                                                                                                                                                                                                                                                                                                                                                                                                                                                                                                                                                                                                                                                                                                                                                                                                                                                                                                                                                                                                                                                                                                                                                                                                                                                                                                                                                                                                                               |   |            |             |             |   |            |             |             |   |            |             |             |   |            |             |             |   |            |             |             |   |            |             |             |   |            |             |            |   |            |             |            |   |            |             |             |   |            |             |             |   |            |             |             |   |             |             |             |   |             |             |             |   |             |             |             |   |             |            |             |   |             |             |             |   |             |             |             |   |             |             |             |   |             |            |             |   |             |             |             |   |             |             |             |   |             |             |             |   |             |             |             |   |             |            |             |   |             |             |             |   |             |             |            |   |             |            |             |   |             |             |             |   |             |            |            |                                                                                                                                                                                                                                                                                                                                                                                                                                                                                                                                                                                                                                                                                                                                                                                                                                                                                                                                                                                                                                                                                                                                                                                                                                                                                                                                                                                                                                                                                                                                                                                                                                                                                                                                                                                                                                                                                                                                                                                                                                                                                                                                                                                                                                                                                                                                                                                                                                                                                                                        |            |            |            |             |            |            |            |                                                                                                                                                                                                                                                                                                                                                                                                                                                                                                                                                                                                                                                                                                                                                                                                                                                                                                                                                                                                                                                                                                                                                                                                                                                                                                                                                                                                                                                                                                                                                                                                                                                                                                                                                                                                                                                                                                                                                                                                                                                                                                                                                                                                                                                                                                                                                                                                                                                                                                                                                                                             |   |            |             |             |   |            |             |             |   |            |             |             |   |            |             |             |   |            |             |             |   |            |             |             |   |            |             |            |   |            |             |            |   |            |            |             |   |            |             |             |   |            |             |             |   |             |             |             |   |             |             |             |   |             |            |             |   |             |             |             |   |             |             |             |   |             |            |             |   |             |             |             |   |             |             |             |   |             |             |             |   |             |             |             |   |             |             |             |   |             |             |             |   |             |            |             |   |             |             |             |   |             |             |            |   |             |             |             |   |             |            |             |   |            |            |            |   |            |            |            |   |            |            |            |
| H                                                                                                                                                                                                                                                                                                                                                                                                                                                                                                                                                                                                                                                                                                                                                                                                                                                                                                                                                                                                                                                                                                                                                                                                                                                                                                                                                                                                                                                                                                                                                                                                                                                                                                                                                                                                                                                                                                                                                                                                                                                                                                                                                                                                                                                                                                                                               | -5.77987800 | -0.78818600                                                                        | -0.37887100                                                                          |             |   |            |            |             |   |            |             |             |   |            |             |             |   |            |             |             |   |            |             |             |   |            |            |             |   |            |             |             |   |            |             |            |   |            |             |             |   |            |            |             |   |            |             |             |   |            |             |             |   |             |             |             |   |             |             |             |   |             |             |            |   |             |             |             |   |             |             |             |   |             |             |             |   |             |             |             |   |             |             |            |   |             |             |             |   |             |            |             |   |             |             |             |   |             |            |             |   |             |            |             |   |             |             |             |                                                                                                                                                                                                                                                                                                                                                                                                                                                                                                                                                                                                                                                                                                                                                                                                                                                                                                                                                                                                                                                                                                                                                                                                                                                                                                                                                                                                                                                                                                                                                                                                                                                                                                                                                                                                                                                                                                                                                                                                                                                                                                                                                                                                                                                                                                                                                                                                                                                                                                                     |            |             |            |                                                                                                                                                                                                                                                                                                                                                                                                                                                                                                                                                                                                                                                                                                                                                                                                                                                                                                                                                                                                                                                                                                                                                                                                                                                                                                                                                                                                                                                                                                                                                                                                                                                                                                                                                                                                                                                                                                                                                                                                                                                                                                                                                                                                                                                                                                                                                                                                                                                                                                                                                                                               |   |            |             |             |   |            |             |             |   |            |             |             |   |            |             |             |   |            |             |             |   |            |             |             |   |            |             |            |   |            |             |            |   |            |             |             |   |            |             |             |   |            |             |             |   |             |             |             |   |             |             |             |   |             |             |             |   |             |            |             |   |             |             |             |   |             |             |             |   |             |             |             |   |             |            |             |   |             |             |             |   |             |             |             |   |             |             |             |   |             |             |             |   |             |            |             |   |             |             |             |   |             |             |            |   |             |            |             |   |             |             |             |   |             |            |            |                                                                                                                                                                                                                                                                                                                                                                                                                                                                                                                                                                                                                                                                                                                                                                                                                                                                                                                                                                                                                                                                                                                                                                                                                                                                                                                                                                                                                                                                                                                                                                                                                                                                                                                                                                                                                                                                                                                                                                                                                                                                                                                                                                                                                                                                                                                                                                                                                                                                                                                        |            |            |            |             |            |            |            |                                                                                                                                                                                                                                                                                                                                                                                                                                                                                                                                                                                                                                                                                                                                                                                                                                                                                                                                                                                                                                                                                                                                                                                                                                                                                                                                                                                                                                                                                                                                                                                                                                                                                                                                                                                                                                                                                                                                                                                                                                                                                                                                                                                                                                                                                                                                                                                                                                                                                                                                                                                             |   |            |             |             |   |            |             |             |   |            |             |             |   |            |             |             |   |            |             |             |   |            |             |             |   |            |             |            |   |            |             |            |   |            |            |             |   |            |             |             |   |            |             |             |   |             |             |             |   |             |             |             |   |             |            |             |   |             |             |             |   |             |             |             |   |             |            |             |   |             |             |             |   |             |             |             |   |             |             |             |   |             |             |             |   |             |             |             |   |             |             |             |   |             |            |             |   |             |             |             |   |             |             |            |   |             |             |             |   |             |            |             |   |            |            |            |   |            |            |            |   |            |            |            |
| H                                                                                                                                                                                                                                                                                                                                                                                                                                                                                                                                                                                                                                                                                                                                                                                                                                                                                                                                                                                                                                                                                                                                                                                                                                                                                                                                                                                                                                                                                                                                                                                                                                                                                                                                                                                                                                                                                                                                                                                                                                                                                                                                                                                                                                                                                                                                               | -3.73615800 | 2.91562200                                                                         | 0.26640300                                                                           |             |   |            |            |             |   |            |             |             |   |            |             |             |   |            |             |             |   |            |             |             |   |            |            |             |   |            |             |             |   |            |             |            |   |            |             |             |   |            |            |             |   |            |             |             |   |            |             |             |   |             |             |             |   |             |             |             |   |             |             |            |   |             |             |             |   |             |             |             |   |             |             |             |   |             |             |             |   |             |             |            |   |             |             |             |   |             |            |             |   |             |             |             |   |             |            |             |   |             |            |             |   |             |             |             |                                                                                                                                                                                                                                                                                                                                                                                                                                                                                                                                                                                                                                                                                                                                                                                                                                                                                                                                                                                                                                                                                                                                                                                                                                                                                                                                                                                                                                                                                                                                                                                                                                                                                                                                                                                                                                                                                                                                                                                                                                                                                                                                                                                                                                                                                                                                                                                                                                                                                                                     |            |             |            |                                                                                                                                                                                                                                                                                                                                                                                                                                                                                                                                                                                                                                                                                                                                                                                                                                                                                                                                                                                                                                                                                                                                                                                                                                                                                                                                                                                                                                                                                                                                                                                                                                                                                                                                                                                                                                                                                                                                                                                                                                                                                                                                                                                                                                                                                                                                                                                                                                                                                                                                                                                               |   |            |             |             |   |            |             |             |   |            |             |             |   |            |             |             |   |            |             |             |   |            |             |             |   |            |             |            |   |            |             |            |   |            |             |             |   |            |             |             |   |            |             |             |   |             |             |             |   |             |             |             |   |             |             |             |   |             |            |             |   |             |             |             |   |             |             |             |   |             |             |             |   |             |            |             |   |             |             |             |   |             |             |             |   |             |             |             |   |             |             |             |   |             |            |             |   |             |             |             |   |             |             |            |   |             |            |             |   |             |             |             |   |             |            |            |                                                                                                                                                                                                                                                                                                                                                                                                                                                                                                                                                                                                                                                                                                                                                                                                                                                                                                                                                                                                                                                                                                                                                                                                                                                                                                                                                                                                                                                                                                                                                                                                                                                                                                                                                                                                                                                                                                                                                                                                                                                                                                                                                                                                                                                                                                                                                                                                                                                                                                                        |            |            |            |             |            |            |            |                                                                                                                                                                                                                                                                                                                                                                                                                                                                                                                                                                                                                                                                                                                                                                                                                                                                                                                                                                                                                                                                                                                                                                                                                                                                                                                                                                                                                                                                                                                                                                                                                                                                                                                                                                                                                                                                                                                                                                                                                                                                                                                                                                                                                                                                                                                                                                                                                                                                                                                                                                                             |   |            |             |             |   |            |             |             |   |            |             |             |   |            |             |             |   |            |             |             |   |            |             |             |   |            |             |            |   |            |             |            |   |            |            |             |   |            |             |             |   |            |             |             |   |             |             |             |   |             |             |             |   |             |            |             |   |             |             |             |   |             |             |             |   |             |            |             |   |             |             |             |   |             |             |             |   |             |             |             |   |             |             |             |   |             |             |             |   |             |             |             |   |             |            |             |   |             |             |             |   |             |             |            |   |             |             |             |   |             |            |             |   |            |            |            |   |            |            |            |   |            |            |            |
| H                                                                                                                                                                                                                                                                                                                                                                                                                                                                                                                                                                                                                                                                                                                                                                                                                                                                                                                                                                                                                                                                                                                                                                                                                                                                                                                                                                                                                                                                                                                                                                                                                                                                                                                                                                                                                                                                                                                                                                                                                                                                                                                                                                                                                                                                                                                                               | -5.85953300 | 1.68012600                                                                         | -0.11686000                                                                          |             |   |            |            |             |   |            |             |             |   |            |             |             |   |            |             |             |   |            |             |             |   |            |            |             |   |            |             |             |   |            |             |            |   |            |             |             |   |            |            |             |   |            |             |             |   |            |             |             |   |             |             |             |   |             |             |             |   |             |             |            |   |             |             |             |   |             |             |             |   |             |             |             |   |             |             |             |   |             |             |            |   |             |             |             |   |             |            |             |   |             |             |             |   |             |            |             |   |             |            |             |   |             |             |             |                                                                                                                                                                                                                                                                                                                                                                                                                                                                                                                                                                                                                                                                                                                                                                                                                                                                                                                                                                                                                                                                                                                                                                                                                                                                                                                                                                                                                                                                                                                                                                                                                                                                                                                                                                                                                                                                                                                                                                                                                                                                                                                                                                                                                                                                                                                                                                                                                                                                                                                     |            |             |            |                                                                                                                                                                                                                                                                                                                                                                                                                                                                                                                                                                                                                                                                                                                                                                                                                                                                                                                                                                                                                                                                                                                                                                                                                                                                                                                                                                                                                                                                                                                                                                                                                                                                                                                                                                                                                                                                                                                                                                                                                                                                                                                                                                                                                                                                                                                                                                                                                                                                                                                                                                                               |   |            |             |             |   |            |             |             |   |            |             |             |   |            |             |             |   |            |             |             |   |            |             |             |   |            |             |            |   |            |             |            |   |            |             |             |   |            |             |             |   |            |             |             |   |             |             |             |   |             |             |             |   |             |             |             |   |             |            |             |   |             |             |             |   |             |             |             |   |             |             |             |   |             |            |             |   |             |             |             |   |             |             |             |   |             |             |             |   |             |             |             |   |             |            |             |   |             |             |             |   |             |             |            |   |             |            |             |   |             |             |             |   |             |            |            |                                                                                                                                                                                                                                                                                                                                                                                                                                                                                                                                                                                                                                                                                                                                                                                                                                                                                                                                                                                                                                                                                                                                                                                                                                                                                                                                                                                                                                                                                                                                                                                                                                                                                                                                                                                                                                                                                                                                                                                                                                                                                                                                                                                                                                                                                                                                                                                                                                                                                                                        |            |            |            |             |            |            |            |                                                                                                                                                                                                                                                                                                                                                                                                                                                                                                                                                                                                                                                                                                                                                                                                                                                                                                                                                                                                                                                                                                                                                                                                                                                                                                                                                                                                                                                                                                                                                                                                                                                                                                                                                                                                                                                                                                                                                                                                                                                                                                                                                                                                                                                                                                                                                                                                                                                                                                                                                                                             |   |            |             |             |   |            |             |             |   |            |             |             |   |            |             |             |   |            |             |             |   |            |             |             |   |            |             |            |   |            |             |            |   |            |            |             |   |            |             |             |   |            |             |             |   |             |             |             |   |             |             |             |   |             |            |             |   |             |             |             |   |             |             |             |   |             |            |             |   |             |             |             |   |             |             |             |   |             |             |             |   |             |             |             |   |             |             |             |   |             |             |             |   |             |            |             |   |             |             |             |   |             |             |            |   |             |             |             |   |             |            |             |   |            |            |            |   |            |            |            |   |            |            |            |
| C                                                                                                                                                                                                                                                                                                                                                                                                                                                                                                                                                                                                                                                                                                                                                                                                                                                                                                                                                                                                                                                                                                                                                                                                                                                                                                                                                                                                                                                                                                                                                                                                                                                                                                                                                                                                                                                                                                                                                                                                                                                                                                                                                                                                                                                                                                                                               | 1.33251000  | -0.99703800                                                                        | 0.04783800                                                                           |             |   |            |            |             |   |            |             |             |   |            |             |             |   |            |             |             |   |            |             |             |   |            |            |             |   |            |             |             |   |            |             |            |   |            |             |             |   |            |            |             |   |            |             |             |   |            |             |             |   |             |             |             |   |             |             |             |   |             |             |            |   |             |             |             |   |             |             |             |   |             |             |             |   |             |             |             |   |             |             |            |   |             |             |             |   |             |            |             |   |             |             |             |   |             |            |             |   |             |            |             |   |             |             |             |                                                                                                                                                                                                                                                                                                                                                                                                                                                                                                                                                                                                                                                                                                                                                                                                                                                                                                                                                                                                                                                                                                                                                                                                                                                                                                                                                                                                                                                                                                                                                                                                                                                                                                                                                                                                                                                                                                                                                                                                                                                                                                                                                                                                                                                                                                                                                                                                                                                                                                                     |            |             |            |                                                                                                                                                                                                                                                                                                                                                                                                                                                                                                                                                                                                                                                                                                                                                                                                                                                                                                                                                                                                                                                                                                                                                                                                                                                                                                                                                                                                                                                                                                                                                                                                                                                                                                                                                                                                                                                                                                                                                                                                                                                                                                                                                                                                                                                                                                                                                                                                                                                                                                                                                                                               |   |            |             |             |   |            |             |             |   |            |             |             |   |            |             |             |   |            |             |             |   |            |             |             |   |            |             |            |   |            |             |            |   |            |             |             |   |            |             |             |   |            |             |             |   |             |             |             |   |             |             |             |   |             |             |             |   |             |            |             |   |             |             |             |   |             |             |             |   |             |             |             |   |             |            |             |   |             |             |             |   |             |             |             |   |             |             |             |   |             |             |             |   |             |            |             |   |             |             |             |   |             |             |            |   |             |            |             |   |             |             |             |   |             |            |            |                                                                                                                                                                                                                                                                                                                                                                                                                                                                                                                                                                                                                                                                                                                                                                                                                                                                                                                                                                                                                                                                                                                                                                                                                                                                                                                                                                                                                                                                                                                                                                                                                                                                                                                                                                                                                                                                                                                                                                                                                                                                                                                                                                                                                                                                                                                                                                                                                                                                                                                        |            |            |            |             |            |            |            |                                                                                                                                                                                                                                                                                                                                                                                                                                                                                                                                                                                                                                                                                                                                                                                                                                                                                                                                                                                                                                                                                                                                                                                                                                                                                                                                                                                                                                                                                                                                                                                                                                                                                                                                                                                                                                                                                                                                                                                                                                                                                                                                                                                                                                                                                                                                                                                                                                                                                                                                                                                             |   |            |             |             |   |            |             |             |   |            |             |             |   |            |             |             |   |            |             |             |   |            |             |             |   |            |             |            |   |            |             |            |   |            |            |             |   |            |             |             |   |            |             |             |   |             |             |             |   |             |             |             |   |             |            |             |   |             |             |             |   |             |             |             |   |             |            |             |   |             |             |             |   |             |             |             |   |             |             |             |   |             |             |             |   |             |             |             |   |             |             |             |   |             |            |             |   |             |             |             |   |             |             |            |   |             |             |             |   |             |            |             |   |            |            |            |   |            |            |            |   |            |            |            |
| H                                                                                                                                                                                                                                                                                                                                                                                                                                                                                                                                                                                                                                                                                                                                                                                                                                                                                                                                                                                                                                                                                                                                                                                                                                                                                                                                                                                                                                                                                                                                                                                                                                                                                                                                                                                                                                                                                                                                                                                                                                                                                                                                                                                                                                                                                                                                               | 1.35769200  | -2.08289900                                                                        | 0.09277200                                                                           |             |   |            |            |             |   |            |             |             |   |            |             |             |   |            |             |             |   |            |             |             |   |            |            |             |   |            |             |             |   |            |             |            |   |            |             |             |   |            |            |             |   |            |             |             |   |            |             |             |   |             |             |             |   |             |             |             |   |             |             |            |   |             |             |             |   |             |             |             |   |             |             |             |   |             |             |             |   |             |             |            |   |             |             |             |   |             |            |             |   |             |             |             |   |             |            |             |   |             |            |             |   |             |             |             |                                                                                                                                                                                                                                                                                                                                                                                                                                                                                                                                                                                                                                                                                                                                                                                                                                                                                                                                                                                                                                                                                                                                                                                                                                                                                                                                                                                                                                                                                                                                                                                                                                                                                                                                                                                                                                                                                                                                                                                                                                                                                                                                                                                                                                                                                                                                                                                                                                                                                                                     |            |             |            |                                                                                                                                                                                                                                                                                                                                                                                                                                                                                                                                                                                                                                                                                                                                                                                                                                                                                                                                                                                                                                                                                                                                                                                                                                                                                                                                                                                                                                                                                                                                                                                                                                                                                                                                                                                                                                                                                                                                                                                                                                                                                                                                                                                                                                                                                                                                                                                                                                                                                                                                                                                               |   |            |             |             |   |            |             |             |   |            |             |             |   |            |             |             |   |            |             |             |   |            |             |             |   |            |             |            |   |            |             |            |   |            |             |             |   |            |             |             |   |            |             |             |   |             |             |             |   |             |             |             |   |             |             |             |   |             |            |             |   |             |             |             |   |             |             |             |   |             |             |             |   |             |            |             |   |             |             |             |   |             |             |             |   |             |             |             |   |             |             |             |   |             |            |             |   |             |             |             |   |             |             |            |   |             |            |             |   |             |             |             |   |             |            |            |                                                                                                                                                                                                                                                                                                                                                                                                                                                                                                                                                                                                                                                                                                                                                                                                                                                                                                                                                                                                                                                                                                                                                                                                                                                                                                                                                                                                                                                                                                                                                                                                                                                                                                                                                                                                                                                                                                                                                                                                                                                                                                                                                                                                                                                                                                                                                                                                                                                                                                                        |            |            |            |             |            |            |            |                                                                                                                                                                                                                                                                                                                                                                                                                                                                                                                                                                                                                                                                                                                                                                                                                                                                                                                                                                                                                                                                                                                                                                                                                                                                                                                                                                                                                                                                                                                                                                                                                                                                                                                                                                                                                                                                                                                                                                                                                                                                                                                                                                                                                                                                                                                                                                                                                                                                                                                                                                                             |   |            |             |             |   |            |             |             |   |            |             |             |   |            |             |             |   |            |             |             |   |            |             |             |   |            |             |            |   |            |             |            |   |            |            |             |   |            |             |             |   |            |             |             |   |             |             |             |   |             |             |             |   |             |            |             |   |             |             |             |   |             |             |             |   |             |            |             |   |             |             |             |   |             |             |             |   |             |             |             |   |             |             |             |   |             |             |             |   |             |             |             |   |             |            |             |   |             |             |             |   |             |             |            |   |             |             |             |   |             |            |             |   |            |            |            |   |            |            |            |   |            |            |            |
| C                                                                                                                                                                                                                                                                                                                                                                                                                                                                                                                                                                                                                                                                                                                                                                                                                                                                                                                                                                                                                                                                                                                                                                                                                                                                                                                                                                                                                                                                                                                                                                                                                                                                                                                                                                                                                                                                                                                                                                                                                                                                                                                                                                                                                                                                                                                                               | 3.58918000  | -1.80841800                                                                        | 1.00510300                                                                           |             |   |            |            |             |   |            |             |             |   |            |             |             |   |            |             |             |   |            |             |             |   |            |            |             |   |            |             |             |   |            |             |            |   |            |             |             |   |            |            |             |   |            |             |             |   |            |             |             |   |             |             |             |   |             |             |             |   |             |             |            |   |             |             |             |   |             |             |             |   |             |             |             |   |             |             |             |   |             |             |            |   |             |             |             |   |             |            |             |   |             |             |             |   |             |            |             |   |             |            |             |   |             |             |             |                                                                                                                                                                                                                                                                                                                                                                                                                                                                                                                                                                                                                                                                                                                                                                                                                                                                                                                                                                                                                                                                                                                                                                                                                                                                                                                                                                                                                                                                                                                                                                                                                                                                                                                                                                                                                                                                                                                                                                                                                                                                                                                                                                                                                                                                                                                                                                                                                                                                                                                     |            |             |            |                                                                                                                                                                                                                                                                                                                                                                                                                                                                                                                                                                                                                                                                                                                                                                                                                                                                                                                                                                                                                                                                                                                                                                                                                                                                                                                                                                                                                                                                                                                                                                                                                                                                                                                                                                                                                                                                                                                                                                                                                                                                                                                                                                                                                                                                                                                                                                                                                                                                                                                                                                                               |   |            |             |             |   |            |             |             |   |            |             |             |   |            |             |             |   |            |             |             |   |            |             |             |   |            |             |            |   |            |             |            |   |            |             |             |   |            |             |             |   |            |             |             |   |             |             |             |   |             |             |             |   |             |             |             |   |             |            |             |   |             |             |             |   |             |             |             |   |             |             |             |   |             |            |             |   |             |             |             |   |             |             |             |   |             |             |             |   |             |             |             |   |             |            |             |   |             |             |             |   |             |             |            |   |             |            |             |   |             |             |             |   |             |            |            |                                                                                                                                                                                                                                                                                                                                                                                                                                                                                                                                                                                                                                                                                                                                                                                                                                                                                                                                                                                                                                                                                                                                                                                                                                                                                                                                                                                                                                                                                                                                                                                                                                                                                                                                                                                                                                                                                                                                                                                                                                                                                                                                                                                                                                                                                                                                                                                                                                                                                                                        |            |            |            |             |            |            |            |                                                                                                                                                                                                                                                                                                                                                                                                                                                                                                                                                                                                                                                                                                                                                                                                                                                                                                                                                                                                                                                                                                                                                                                                                                                                                                                                                                                                                                                                                                                                                                                                                                                                                                                                                                                                                                                                                                                                                                                                                                                                                                                                                                                                                                                                                                                                                                                                                                                                                                                                                                                             |   |            |             |             |   |            |             |             |   |            |             |             |   |            |             |             |   |            |             |             |   |            |             |             |   |            |             |            |   |            |             |            |   |            |            |             |   |            |             |             |   |            |             |             |   |             |             |             |   |             |             |             |   |             |            |             |   |             |             |             |   |             |             |             |   |             |            |             |   |             |             |             |   |             |             |             |   |             |             |             |   |             |             |             |   |             |             |             |   |             |             |             |   |             |            |             |   |             |             |             |   |             |             |            |   |             |             |             |   |             |            |             |   |            |            |            |   |            |            |            |   |            |            |            |
| C                                                                                                                                                                                                                                                                                                                                                                                                                                                                                                                                                                                                                                                                                                                                                                                                                                                                                                                                                                                                                                                                                                                                                                                                                                                                                                                                                                                                                                                                                                                                                                                                                                                                                                                                                                                                                                                                                                                                                                                                                                                                                                                                                                                                                                                                                                                                               | 2.54957100  | -0.89266300                                                                        | 0.96035500                                                                           |             |   |            |            |             |   |            |             |             |   |            |             |             |   |            |             |             |   |            |             |             |   |            |            |             |   |            |             |             |   |            |             |            |   |            |             |             |   |            |            |             |   |            |             |             |   |            |             |             |   |             |             |             |   |             |             |             |   |             |             |            |   |             |             |             |   |             |             |             |   |             |             |             |   |             |             |             |   |             |             |            |   |             |             |             |   |             |            |             |   |             |             |             |   |             |            |             |   |             |            |             |   |             |             |             |                                                                                                                                                                                                                                                                                                                                                                                                                                                                                                                                                                                                                                                                                                                                                                                                                                                                                                                                                                                                                                                                                                                                                                                                                                                                                                                                                                                                                                                                                                                                                                                                                                                                                                                                                                                                                                                                                                                                                                                                                                                                                                                                                                                                                                                                                                                                                                                                                                                                                                                     |            |             |            |                                                                                                                                                                                                                                                                                                                                                                                                                                                                                                                                                                                                                                                                                                                                                                                                                                                                                                                                                                                                                                                                                                                                                                                                                                                                                                                                                                                                                                                                                                                                                                                                                                                                                                                                                                                                                                                                                                                                                                                                                                                                                                                                                                                                                                                                                                                                                                                                                                                                                                                                                                                               |   |            |             |             |   |            |             |             |   |            |             |             |   |            |             |             |   |            |             |             |   |            |             |             |   |            |             |            |   |            |             |            |   |            |             |             |   |            |             |             |   |            |             |             |   |             |             |             |   |             |             |             |   |             |             |             |   |             |            |             |   |             |             |             |   |             |             |             |   |             |             |             |   |             |            |             |   |             |             |             |   |             |             |             |   |             |             |             |   |             |             |             |   |             |            |             |   |             |             |             |   |             |             |            |   |             |            |             |   |             |             |             |   |             |            |            |                                                                                                                                                                                                                                                                                                                                                                                                                                                                                                                                                                                                                                                                                                                                                                                                                                                                                                                                                                                                                                                                                                                                                                                                                                                                                                                                                                                                                                                                                                                                                                                                                                                                                                                                                                                                                                                                                                                                                                                                                                                                                                                                                                                                                                                                                                                                                                                                                                                                                                                        |            |            |            |             |            |            |            |                                                                                                                                                                                                                                                                                                                                                                                                                                                                                                                                                                                                                                                                                                                                                                                                                                                                                                                                                                                                                                                                                                                                                                                                                                                                                                                                                                                                                                                                                                                                                                                                                                                                                                                                                                                                                                                                                                                                                                                                                                                                                                                                                                                                                                                                                                                                                                                                                                                                                                                                                                                             |   |            |             |             |   |            |             |             |   |            |             |             |   |            |             |             |   |            |             |             |   |            |             |             |   |            |             |            |   |            |             |            |   |            |            |             |   |            |             |             |   |            |             |             |   |             |             |             |   |             |             |             |   |             |            |             |   |             |             |             |   |             |             |             |   |             |            |             |   |             |             |             |   |             |             |             |   |             |             |             |   |             |             |             |   |             |             |             |   |             |             |             |   |             |            |             |   |             |             |             |   |             |             |            |   |             |             |             |   |             |            |             |   |            |            |            |   |            |            |            |   |            |            |            |
| C                                                                                                                                                                                                                                                                                                                                                                                                                                                                                                                                                                                                                                                                                                                                                                                                                                                                                                                                                                                                                                                                                                                                                                                                                                                                                                                                                                                                                                                                                                                                                                                                                                                                                                                                                                                                                                                                                                                                                                                                                                                                                                                                                                                                                                                                                                                                               | 2.27542700  | -0.16727700                                                                        | -0.20058000                                                                          |             |   |            |            |             |   |            |             |             |   |            |             |             |   |            |             |             |   |            |             |             |   |            |            |             |   |            |             |             |   |            |             |            |   |            |             |             |   |            |            |             |   |            |             |             |   |            |             |             |   |             |             |             |   |             |             |             |   |             |             |            |   |             |             |             |   |             |             |             |   |             |             |             |   |             |             |             |   |             |             |            |   |             |             |             |   |             |            |             |   |             |             |             |   |             |            |             |   |             |            |             |   |             |             |             |                                                                                                                                                                                                                                                                                                                                                                                                                                                                                                                                                                                                                                                                                                                                                                                                                                                                                                                                                                                                                                                                                                                                                                                                                                                                                                                                                                                                                                                                                                                                                                                                                                                                                                                                                                                                                                                                                                                                                                                                                                                                                                                                                                                                                                                                                                                                                                                                                                                                                                                     |            |             |            |                                                                                                                                                                                                                                                                                                                                                                                                                                                                                                                                                                                                                                                                                                                                                                                                                                                                                                                                                                                                                                                                                                                                                                                                                                                                                                                                                                                                                                                                                                                                                                                                                                                                                                                                                                                                                                                                                                                                                                                                                                                                                                                                                                                                                                                                                                                                                                                                                                                                                                                                                                                               |   |            |             |             |   |            |             |             |   |            |             |             |   |            |             |             |   |            |             |             |   |            |             |             |   |            |             |            |   |            |             |            |   |            |             |             |   |            |             |             |   |            |             |             |   |             |             |             |   |             |             |             |   |             |             |             |   |             |            |             |   |             |             |             |   |             |             |             |   |             |             |             |   |             |            |             |   |             |             |             |   |             |             |             |   |             |             |             |   |             |             |             |   |             |            |             |   |             |             |             |   |             |             |            |   |             |            |             |   |             |             |             |   |             |            |            |                                                                                                                                                                                                                                                                                                                                                                                                                                                                                                                                                                                                                                                                                                                                                                                                                                                                                                                                                                                                                                                                                                                                                                                                                                                                                                                                                                                                                                                                                                                                                                                                                                                                                                                                                                                                                                                                                                                                                                                                                                                                                                                                                                                                                                                                                                                                                                                                                                                                                                                        |            |            |            |             |            |            |            |                                                                                                                                                                                                                                                                                                                                                                                                                                                                                                                                                                                                                                                                                                                                                                                                                                                                                                                                                                                                                                                                                                                                                                                                                                                                                                                                                                                                                                                                                                                                                                                                                                                                                                                                                                                                                                                                                                                                                                                                                                                                                                                                                                                                                                                                                                                                                                                                                                                                                                                                                                                             |   |            |             |             |   |            |             |             |   |            |             |             |   |            |             |             |   |            |             |             |   |            |             |             |   |            |             |            |   |            |             |            |   |            |            |             |   |            |             |             |   |            |             |             |   |             |             |             |   |             |             |             |   |             |            |             |   |             |             |             |   |             |             |             |   |             |            |             |   |             |             |             |   |             |             |             |   |             |             |             |   |             |             |             |   |             |             |             |   |             |             |             |   |             |            |             |   |             |             |             |   |             |             |            |   |             |             |             |   |             |            |             |   |            |            |            |   |            |            |            |   |            |            |            |
| C                                                                                                                                                                                                                                                                                                                                                                                                                                                                                                                                                                                                                                                                                                                                                                                                                                                                                                                                                                                                                                                                                                                                                                                                                                                                                                                                                                                                                                                                                                                                                                                                                                                                                                                                                                                                                                                                                                                                                                                                                                                                                                                                                                                                                                                                                                                                               | 3.08270400  | -0.39272100                                                                        | -1.31330100                                                                          |             |   |            |            |             |   |            |             |             |   |            |             |             |   |            |             |             |   |            |             |             |   |            |            |             |   |            |             |             |   |            |             |            |   |            |             |             |   |            |            |             |   |            |             |             |   |            |             |             |   |             |             |             |   |             |             |             |   |             |             |            |   |             |             |             |   |             |             |             |   |             |             |             |   |             |             |             |   |             |             |            |   |             |             |             |   |             |            |             |   |             |             |             |   |             |            |             |   |             |            |             |   |             |             |             |                                                                                                                                                                                                                                                                                                                                                                                                                                                                                                                                                                                                                                                                                                                                                                                                                                                                                                                                                                                                                                                                                                                                                                                                                                                                                                                                                                                                                                                                                                                                                                                                                                                                                                                                                                                                                                                                                                                                                                                                                                                                                                                                                                                                                                                                                                                                                                                                                                                                                                                     |            |             |            |                                                                                                                                                                                                                                                                                                                                                                                                                                                                                                                                                                                                                                                                                                                                                                                                                                                                                                                                                                                                                                                                                                                                                                                                                                                                                                                                                                                                                                                                                                                                                                                                                                                                                                                                                                                                                                                                                                                                                                                                                                                                                                                                                                                                                                                                                                                                                                                                                                                                                                                                                                                               |   |            |             |             |   |            |             |             |   |            |             |             |   |            |             |             |   |            |             |             |   |            |             |             |   |            |             |            |   |            |             |            |   |            |             |             |   |            |             |             |   |            |             |             |   |             |             |             |   |             |             |             |   |             |             |             |   |             |            |             |   |             |             |             |   |             |             |             |   |             |             |             |   |             |            |             |   |             |             |             |   |             |             |             |   |             |             |             |   |             |             |             |   |             |            |             |   |             |             |             |   |             |             |            |   |             |            |             |   |             |             |             |   |             |            |            |                                                                                                                                                                                                                                                                                                                                                                                                                                                                                                                                                                                                                                                                                                                                                                                                                                                                                                                                                                                                                                                                                                                                                                                                                                                                                                                                                                                                                                                                                                                                                                                                                                                                                                                                                                                                                                                                                                                                                                                                                                                                                                                                                                                                                                                                                                                                                                                                                                                                                                                        |            |            |            |             |            |            |            |                                                                                                                                                                                                                                                                                                                                                                                                                                                                                                                                                                                                                                                                                                                                                                                                                                                                                                                                                                                                                                                                                                                                                                                                                                                                                                                                                                                                                                                                                                                                                                                                                                                                                                                                                                                                                                                                                                                                                                                                                                                                                                                                                                                                                                                                                                                                                                                                                                                                                                                                                                                             |   |            |             |             |   |            |             |             |   |            |             |             |   |            |             |             |   |            |             |             |   |            |             |             |   |            |             |            |   |            |             |            |   |            |            |             |   |            |             |             |   |            |             |             |   |             |             |             |   |             |             |             |   |             |            |             |   |             |             |             |   |             |             |             |   |             |            |             |   |             |             |             |   |             |             |             |   |             |             |             |   |             |             |             |   |             |             |             |   |             |             |             |   |             |            |             |   |             |             |             |   |             |             |            |   |             |             |             |   |             |            |             |   |            |            |            |   |            |            |            |   |            |            |            |
| C                                                                                                                                                                                                                                                                                                                                                                                                                                                                                                                                                                                                                                                                                                                                                                                                                                                                                                                                                                                                                                                                                                                                                                                                                                                                                                                                                                                                                                                                                                                                                                                                                                                                                                                                                                                                                                                                                                                                                                                                                                                                                                                                                                                                                                                                                                                                               | 4.12546000  | -1.31026900                                                                        | -1.27519600                                                                          |             |   |            |            |             |   |            |             |             |   |            |             |             |   |            |             |             |   |            |             |             |   |            |            |             |   |            |             |             |   |            |             |            |   |            |             |             |   |            |            |             |   |            |             |             |   |            |             |             |   |             |             |             |   |             |             |             |   |             |             |            |   |             |             |             |   |             |             |             |   |             |             |             |   |             |             |             |   |             |             |            |   |             |             |             |   |             |            |             |   |             |             |             |   |             |            |             |   |             |            |             |   |             |             |             |                                                                                                                                                                                                                                                                                                                                                                                                                                                                                                                                                                                                                                                                                                                                                                                                                                                                                                                                                                                                                                                                                                                                                                                                                                                                                                                                                                                                                                                                                                                                                                                                                                                                                                                                                                                                                                                                                                                                                                                                                                                                                                                                                                                                                                                                                                                                                                                                                                                                                                                     |            |             |            |                                                                                                                                                                                                                                                                                                                                                                                                                                                                                                                                                                                                                                                                                                                                                                                                                                                                                                                                                                                                                                                                                                                                                                                                                                                                                                                                                                                                                                                                                                                                                                                                                                                                                                                                                                                                                                                                                                                                                                                                                                                                                                                                                                                                                                                                                                                                                                                                                                                                                                                                                                                               |   |            |             |             |   |            |             |             |   |            |             |             |   |            |             |             |   |            |             |             |   |            |             |             |   |            |             |            |   |            |             |            |   |            |             |             |   |            |             |             |   |            |             |             |   |             |             |             |   |             |             |             |   |             |             |             |   |             |            |             |   |             |             |             |   |             |             |             |   |             |             |             |   |             |            |             |   |             |             |             |   |             |             |             |   |             |             |             |   |             |             |             |   |             |            |             |   |             |             |             |   |             |             |            |   |             |            |             |   |             |             |             |   |             |            |            |                                                                                                                                                                                                                                                                                                                                                                                                                                                                                                                                                                                                                                                                                                                                                                                                                                                                                                                                                                                                                                                                                                                                                                                                                                                                                                                                                                                                                                                                                                                                                                                                                                                                                                                                                                                                                                                                                                                                                                                                                                                                                                                                                                                                                                                                                                                                                                                                                                                                                                                        |            |            |            |             |            |            |            |                                                                                                                                                                                                                                                                                                                                                                                                                                                                                                                                                                                                                                                                                                                                                                                                                                                                                                                                                                                                                                                                                                                                                                                                                                                                                                                                                                                                                                                                                                                                                                                                                                                                                                                                                                                                                                                                                                                                                                                                                                                                                                                                                                                                                                                                                                                                                                                                                                                                                                                                                                                             |   |            |             |             |   |            |             |             |   |            |             |             |   |            |             |             |   |            |             |             |   |            |             |             |   |            |             |            |   |            |             |            |   |            |            |             |   |            |             |             |   |            |             |             |   |             |             |             |   |             |             |             |   |             |            |             |   |             |             |             |   |             |             |             |   |             |            |             |   |             |             |             |   |             |             |             |   |             |             |             |   |             |             |             |   |             |             |             |   |             |             |             |   |             |            |             |   |             |             |             |   |             |             |            |   |             |             |             |   |             |            |             |   |            |            |            |   |            |            |            |   |            |            |            |
| C                                                                                                                                                                                                                                                                                                                                                                                                                                                                                                                                                                                                                                                                                                                                                                                                                                                                                                                                                                                                                                                                                                                                                                                                                                                                                                                                                                                                                                                                                                                                                                                                                                                                                                                                                                                                                                                                                                                                                                                                                                                                                                                                                                                                                                                                                                                                               | 4.38375300  | -2.02376000                                                                        | -0.11446600                                                                          |             |   |            |            |             |   |            |             |             |   |            |             |             |   |            |             |             |   |            |             |             |   |            |            |             |   |            |             |             |   |            |             |            |   |            |             |             |   |            |            |             |   |            |             |             |   |            |             |             |   |             |             |             |   |             |             |             |   |             |             |            |   |             |             |             |   |             |             |             |   |             |             |             |   |             |             |             |   |             |             |            |   |             |             |             |   |             |            |             |   |             |             |             |   |             |            |             |   |             |            |             |   |             |             |             |                                                                                                                                                                                                                                                                                                                                                                                                                                                                                                                                                                                                                                                                                                                                                                                                                                                                                                                                                                                                                                                                                                                                                                                                                                                                                                                                                                                                                                                                                                                                                                                                                                                                                                                                                                                                                                                                                                                                                                                                                                                                                                                                                                                                                                                                                                                                                                                                                                                                                                                     |            |             |            |                                                                                                                                                                                                                                                                                                                                                                                                                                                                                                                                                                                                                                                                                                                                                                                                                                                                                                                                                                                                                                                                                                                                                                                                                                                                                                                                                                                                                                                                                                                                                                                                                                                                                                                                                                                                                                                                                                                                                                                                                                                                                                                                                                                                                                                                                                                                                                                                                                                                                                                                                                                               |   |            |             |             |   |            |             |             |   |            |             |             |   |            |             |             |   |            |             |             |   |            |             |             |   |            |             |            |   |            |             |            |   |            |             |             |   |            |             |             |   |            |             |             |   |             |             |             |   |             |             |             |   |             |             |             |   |             |            |             |   |             |             |             |   |             |             |             |   |             |             |             |   |             |            |             |   |             |             |             |   |             |             |             |   |             |             |             |   |             |             |             |   |             |            |             |   |             |             |             |   |             |             |            |   |             |            |             |   |             |             |             |   |             |            |            |                                                                                                                                                                                                                                                                                                                                                                                                                                                                                                                                                                                                                                                                                                                                                                                                                                                                                                                                                                                                                                                                                                                                                                                                                                                                                                                                                                                                                                                                                                                                                                                                                                                                                                                                                                                                                                                                                                                                                                                                                                                                                                                                                                                                                                                                                                                                                                                                                                                                                                                        |            |            |            |             |            |            |            |                                                                                                                                                                                                                                                                                                                                                                                                                                                                                                                                                                                                                                                                                                                                                                                                                                                                                                                                                                                                                                                                                                                                                                                                                                                                                                                                                                                                                                                                                                                                                                                                                                                                                                                                                                                                                                                                                                                                                                                                                                                                                                                                                                                                                                                                                                                                                                                                                                                                                                                                                                                             |   |            |             |             |   |            |             |             |   |            |             |             |   |            |             |             |   |            |             |             |   |            |             |             |   |            |             |            |   |            |             |            |   |            |            |             |   |            |             |             |   |            |             |             |   |             |             |             |   |             |             |             |   |             |            |             |   |             |             |             |   |             |             |             |   |             |            |             |   |             |             |             |   |             |             |             |   |             |             |             |   |             |             |             |   |             |             |             |   |             |             |             |   |             |            |             |   |             |             |             |   |             |             |            |   |             |             |             |   |             |            |             |   |            |            |            |   |            |            |            |   |            |            |            |
| C                                                                                                                                                                                                                                                                                                                                                                                                                                                                                                                                                                                                                                                                                                                                                                                                                                                                                                                                                                                                                                                                                                                                                                                                                                                                                                                                                                                                                                                                                                                                                                                                                                                                                                                                                                                                                                                                                                                                                                                                                                                                                                                                                                                                                                                                                                                                               | 3.78257000  | -2.35787100                                                                        | 1.91894600                                                                           |             |   |            |            |             |   |            |             |             |   |            |             |             |   |            |             |             |   |            |             |             |   |            |            |             |   |            |             |             |   |            |             |            |   |            |             |             |   |            |            |             |   |            |             |             |   |            |             |             |   |             |             |             |   |             |             |             |   |             |             |            |   |             |             |             |   |             |             |             |   |             |             |             |   |             |             |             |   |             |             |            |   |             |             |             |   |             |            |             |   |             |             |             |   |             |            |             |   |             |            |             |   |             |             |             |                                                                                                                                                                                                                                                                                                                                                                                                                                                                                                                                                                                                                                                                                                                                                                                                                                                                                                                                                                                                                                                                                                                                                                                                                                                                                                                                                                                                                                                                                                                                                                                                                                                                                                                                                                                                                                                                                                                                                                                                                                                                                                                                                                                                                                                                                                                                                                                                                                                                                                                     |            |             |            |                                                                                                                                                                                                                                                                                                                                                                                                                                                                                                                                                                                                                                                                                                                                                                                                                                                                                                                                                                                                                                                                                                                                                                                                                                                                                                                                                                                                                                                                                                                                                                                                                                                                                                                                                                                                                                                                                                                                                                                                                                                                                                                                                                                                                                                                                                                                                                                                                                                                                                                                                                                               |   |            |             |             |   |            |             |             |   |            |             |             |   |            |             |             |   |            |             |             |   |            |             |             |   |            |             |            |   |            |             |            |   |            |             |             |   |            |             |             |   |            |             |             |   |             |             |             |   |             |             |             |   |             |             |             |   |             |            |             |   |             |             |             |   |             |             |             |   |             |             |             |   |             |            |             |   |             |             |             |   |             |             |             |   |             |             |             |   |             |             |             |   |             |            |             |   |             |             |             |   |             |             |            |   |             |            |             |   |             |             |             |   |             |            |            |                                                                                                                                                                                                                                                                                                                                                                                                                                                                                                                                                                                                                                                                                                                                                                                                                                                                                                                                                                                                                                                                                                                                                                                                                                                                                                                                                                                                                                                                                                                                                                                                                                                                                                                                                                                                                                                                                                                                                                                                                                                                                                                                                                                                                                                                                                                                                                                                                                                                                                                        |            |            |            |             |            |            |            |                                                                                                                                                                                                                                                                                                                                                                                                                                                                                                                                                                                                                                                                                                                                                                                                                                                                                                                                                                                                                                                                                                                                                                                                                                                                                                                                                                                                                                                                                                                                                                                                                                                                                                                                                                                                                                                                                                                                                                                                                                                                                                                                                                                                                                                                                                                                                                                                                                                                                                                                                                                             |   |            |             |             |   |            |             |             |   |            |             |             |   |            |             |             |   |            |             |             |   |            |             |             |   |            |             |            |   |            |             |            |   |            |            |             |   |            |             |             |   |            |             |             |   |             |             |             |   |             |             |             |   |             |            |             |   |             |             |             |   |             |             |             |   |             |            |             |   |             |             |             |   |             |             |             |   |             |             |             |   |             |             |             |   |             |             |             |   |             |             |             |   |             |            |             |   |             |             |             |   |             |             |            |   |             |             |             |   |             |            |             |   |            |            |            |   |            |            |            |   |            |            |            |
| H                                                                                                                                                                                                                                                                                                                                                                                                                                                                                                                                                                                                                                                                                                                                                                                                                                                                                                                                                                                                                                                                                                                                                                                                                                                                                                                                                                                                                                                                                                                                                                                                                                                                                                                                                                                                                                                                                                                                                                                                                                                                                                                                                                                                                                                                                                                                               | 1.94103600  | -0.72174500                                                                        | 1.83965400                                                                           |             |   |            |            |             |   |            |             |             |   |            |             |             |   |            |             |             |   |            |             |             |   |            |            |             |   |            |             |             |   |            |             |            |   |            |             |             |   |            |            |             |   |            |             |             |   |            |             |             |   |             |             |             |   |             |             |             |   |             |             |            |   |             |             |             |   |             |             |             |   |             |             |             |   |             |             |             |   |             |             |            |   |             |             |             |   |             |            |             |   |             |             |             |   |             |            |             |   |             |            |             |   |             |             |             |                                                                                                                                                                                                                                                                                                                                                                                                                                                                                                                                                                                                                                                                                                                                                                                                                                                                                                                                                                                                                                                                                                                                                                                                                                                                                                                                                                                                                                                                                                                                                                                                                                                                                                                                                                                                                                                                                                                                                                                                                                                                                                                                                                                                                                                                                                                                                                                                                                                                                                                     |            |             |            |                                                                                                                                                                                                                                                                                                                                                                                                                                                                                                                                                                                                                                                                                                                                                                                                                                                                                                                                                                                                                                                                                                                                                                                                                                                                                                                                                                                                                                                                                                                                                                                                                                                                                                                                                                                                                                                                                                                                                                                                                                                                                                                                                                                                                                                                                                                                                                                                                                                                                                                                                                                               |   |            |             |             |   |            |             |             |   |            |             |             |   |            |             |             |   |            |             |             |   |            |             |             |   |            |             |            |   |            |             |            |   |            |             |             |   |            |             |             |   |            |             |             |   |             |             |             |   |             |             |             |   |             |             |             |   |             |            |             |   |             |             |             |   |             |             |             |   |             |             |             |   |             |            |             |   |             |             |             |   |             |             |             |   |             |             |             |   |             |             |             |   |             |            |             |   |             |             |             |   |             |             |            |   |             |            |             |   |             |             |             |   |             |            |            |                                                                                                                                                                                                                                                                                                                                                                                                                                                                                                                                                                                                                                                                                                                                                                                                                                                                                                                                                                                                                                                                                                                                                                                                                                                                                                                                                                                                                                                                                                                                                                                                                                                                                                                                                                                                                                                                                                                                                                                                                                                                                                                                                                                                                                                                                                                                                                                                                                                                                                                        |            |            |            |             |            |            |            |                                                                                                                                                                                                                                                                                                                                                                                                                                                                                                                                                                                                                                                                                                                                                                                                                                                                                                                                                                                                                                                                                                                                                                                                                                                                                                                                                                                                                                                                                                                                                                                                                                                                                                                                                                                                                                                                                                                                                                                                                                                                                                                                                                                                                                                                                                                                                                                                                                                                                                                                                                                             |   |            |             |             |   |            |             |             |   |            |             |             |   |            |             |             |   |            |             |             |   |            |             |             |   |            |             |            |   |            |             |            |   |            |            |             |   |            |             |             |   |            |             |             |   |             |             |             |   |             |             |             |   |             |            |             |   |             |             |             |   |             |             |             |   |             |            |             |   |             |             |             |   |             |             |             |   |             |             |             |   |             |             |             |   |             |             |             |   |             |             |             |   |             |            |             |   |             |             |             |   |             |             |            |   |             |             |             |   |             |            |             |   |            |            |            |   |            |            |            |   |            |            |            |
| H                                                                                                                                                                                                                                                                                                                                                                                                                                                                                                                                                                                                                                                                                                                                                                                                                                                                                                                                                                                                                                                                                                                                                                                                                                                                                                                                                                                                                                                                                                                                                                                                                                                                                                                                                                                                                                                                                                                                                                                                                                                                                                                                                                                                                                                                                                                                               | 2.88883000  | 0.15847600                                                                         | -2.22669700                                                                          |             |   |            |            |             |   |            |             |             |   |            |             |             |   |            |             |             |   |            |             |             |   |            |            |             |   |            |             |             |   |            |             |            |   |            |             |             |   |            |            |             |   |            |             |             |   |            |             |             |   |             |             |             |   |             |             |             |   |             |             |            |   |             |             |             |   |             |             |             |   |             |             |             |   |             |             |             |   |             |             |            |   |             |             |             |   |             |            |             |   |             |             |             |   |             |            |             |   |             |            |             |   |             |             |             |                                                                                                                                                                                                                                                                                                                                                                                                                                                                                                                                                                                                                                                                                                                                                                                                                                                                                                                                                                                                                                                                                                                                                                                                                                                                                                                                                                                                                                                                                                                                                                                                                                                                                                                                                                                                                                                                                                                                                                                                                                                                                                                                                                                                                                                                                                                                                                                                                                                                                                                     |            |             |            |                                                                                                                                                                                                                                                                                                                                                                                                                                                                                                                                                                                                                                                                                                                                                                                                                                                                                                                                                                                                                                                                                                                                                                                                                                                                                                                                                                                                                                                                                                                                                                                                                                                                                                                                                                                                                                                                                                                                                                                                                                                                                                                                                                                                                                                                                                                                                                                                                                                                                                                                                                                               |   |            |             |             |   |            |             |             |   |            |             |             |   |            |             |             |   |            |             |             |   |            |             |             |   |            |             |            |   |            |             |            |   |            |             |             |   |            |             |             |   |            |             |             |   |             |             |             |   |             |             |             |   |             |             |             |   |             |            |             |   |             |             |             |   |             |             |             |   |             |             |             |   |             |            |             |   |             |             |             |   |             |             |             |   |             |             |             |   |             |             |             |   |             |            |             |   |             |             |             |   |             |             |            |   |             |            |             |   |             |             |             |   |             |            |            |                                                                                                                                                                                                                                                                                                                                                                                                                                                                                                                                                                                                                                                                                                                                                                                                                                                                                                                                                                                                                                                                                                                                                                                                                                                                                                                                                                                                                                                                                                                                                                                                                                                                                                                                                                                                                                                                                                                                                                                                                                                                                                                                                                                                                                                                                                                                                                                                                                                                                                                        |            |            |            |             |            |            |            |                                                                                                                                                                                                                                                                                                                                                                                                                                                                                                                                                                                                                                                                                                                                                                                                                                                                                                                                                                                                                                                                                                                                                                                                                                                                                                                                                                                                                                                                                                                                                                                                                                                                                                                                                                                                                                                                                                                                                                                                                                                                                                                                                                                                                                                                                                                                                                                                                                                                                                                                                                                             |   |            |             |             |   |            |             |             |   |            |             |             |   |            |             |             |   |            |             |             |   |            |             |             |   |            |             |            |   |            |             |            |   |            |            |             |   |            |             |             |   |            |             |             |   |             |             |             |   |             |             |             |   |             |            |             |   |             |             |             |   |             |             |             |   |             |            |             |   |             |             |             |   |             |             |             |   |             |             |             |   |             |             |             |   |             |             |             |   |             |             |             |   |             |            |             |   |             |             |             |   |             |             |            |   |             |             |             |   |             |            |             |   |            |            |            |   |            |            |            |   |            |            |            |
| H                                                                                                                                                                                                                                                                                                                                                                                                                                                                                                                                                                                                                                                                                                                                                                                                                                                                                                                                                                                                                                                                                                                                                                                                                                                                                                                                                                                                                                                                                                                                                                                                                                                                                                                                                                                                                                                                                                                                                                                                                                                                                                                                                                                                                                                                                                                                               | 4.73617800  | -1.46723100                                                                        | -2.15642900                                                                          |             |   |            |            |             |   |            |             |             |   |            |             |             |   |            |             |             |   |            |             |             |   |            |            |             |   |            |             |             |   |            |             |            |   |            |             |             |   |            |            |             |   |            |             |             |   |            |             |             |   |             |             |             |   |             |             |             |   |             |             |            |   |             |             |             |   |             |             |             |   |             |             |             |   |             |             |             |   |             |             |            |   |             |             |             |   |             |            |             |   |             |             |             |   |             |            |             |   |             |            |             |   |             |             |             |                                                                                                                                                                                                                                                                                                                                                                                                                                                                                                                                                                                                                                                                                                                                                                                                                                                                                                                                                                                                                                                                                                                                                                                                                                                                                                                                                                                                                                                                                                                                                                                                                                                                                                                                                                                                                                                                                                                                                                                                                                                                                                                                                                                                                                                                                                                                                                                                                                                                                                                     |            |             |            |                                                                                                                                                                                                                                                                                                                                                                                                                                                                                                                                                                                                                                                                                                                                                                                                                                                                                                                                                                                                                                                                                                                                                                                                                                                                                                                                                                                                                                                                                                                                                                                                                                                                                                                                                                                                                                                                                                                                                                                                                                                                                                                                                                                                                                                                                                                                                                                                                                                                                                                                                                                               |   |            |             |             |   |            |             |             |   |            |             |             |   |            |             |             |   |            |             |             |   |            |             |             |   |            |             |            |   |            |             |            |   |            |             |             |   |            |             |             |   |            |             |             |   |             |             |             |   |             |             |             |   |             |             |             |   |             |            |             |   |             |             |             |   |             |             |             |   |             |             |             |   |             |            |             |   |             |             |             |   |             |             |             |   |             |             |             |   |             |             |             |   |             |            |             |   |             |             |             |   |             |             |            |   |             |            |             |   |             |             |             |   |             |            |            |                                                                                                                                                                                                                                                                                                                                                                                                                                                                                                                                                                                                                                                                                                                                                                                                                                                                                                                                                                                                                                                                                                                                                                                                                                                                                                                                                                                                                                                                                                                                                                                                                                                                                                                                                                                                                                                                                                                                                                                                                                                                                                                                                                                                                                                                                                                                                                                                                                                                                                                        |            |            |            |             |            |            |            |                                                                                                                                                                                                                                                                                                                                                                                                                                                                                                                                                                                                                                                                                                                                                                                                                                                                                                                                                                                                                                                                                                                                                                                                                                                                                                                                                                                                                                                                                                                                                                                                                                                                                                                                                                                                                                                                                                                                                                                                                                                                                                                                                                                                                                                                                                                                                                                                                                                                                                                                                                                             |   |            |             |             |   |            |             |             |   |            |             |             |   |            |             |             |   |            |             |             |   |            |             |             |   |            |             |            |   |            |             |            |   |            |            |             |   |            |             |             |   |            |             |             |   |             |             |             |   |             |             |             |   |             |            |             |   |             |             |             |   |             |             |             |   |             |            |             |   |             |             |             |   |             |             |             |   |             |             |             |   |             |             |             |   |             |             |             |   |             |             |             |   |             |            |             |   |             |             |             |   |             |             |            |   |             |             |             |   |             |            |             |   |            |            |            |   |            |            |            |   |            |            |            |
| H                                                                                                                                                                                                                                                                                                                                                                                                                                                                                                                                                                                                                                                                                                                                                                                                                                                                                                                                                                                                                                                                                                                                                                                                                                                                                                                                                                                                                                                                                                                                                                                                                                                                                                                                                                                                                                                                                                                                                                                                                                                                                                                                                                                                                                                                                                                                               | 5.19532000  | -2.74011300                                                                        | -0.08024500                                                                          |             |   |            |            |             |   |            |             |             |   |            |             |             |   |            |             |             |   |            |             |             |   |            |            |             |   |            |             |             |   |            |             |            |   |            |             |             |   |            |            |             |   |            |             |             |   |            |             |             |   |             |             |             |   |             |             |             |   |             |             |            |   |             |             |             |   |             |             |             |   |             |             |             |   |             |             |             |   |             |             |            |   |             |             |             |   |             |            |             |   |             |             |             |   |             |            |             |   |             |            |             |   |             |             |             |                                                                                                                                                                                                                                                                                                                                                                                                                                                                                                                                                                                                                                                                                                                                                                                                                                                                                                                                                                                                                                                                                                                                                                                                                                                                                                                                                                                                                                                                                                                                                                                                                                                                                                                                                                                                                                                                                                                                                                                                                                                                                                                                                                                                                                                                                                                                                                                                                                                                                                                     |            |             |            |                                                                                                                                                                                                                                                                                                                                                                                                                                                                                                                                                                                                                                                                                                                                                                                                                                                                                                                                                                                                                                                                                                                                                                                                                                                                                                                                                                                                                                                                                                                                                                                                                                                                                                                                                                                                                                                                                                                                                                                                                                                                                                                                                                                                                                                                                                                                                                                                                                                                                                                                                                                               |   |            |             |             |   |            |             |             |   |            |             |             |   |            |             |             |   |            |             |             |   |            |             |             |   |            |             |            |   |            |             |            |   |            |             |             |   |            |             |             |   |            |             |             |   |             |             |             |   |             |             |             |   |             |             |             |   |             |            |             |   |             |             |             |   |             |             |             |   |             |             |             |   |             |            |             |   |             |             |             |   |             |             |             |   |             |             |             |   |             |             |             |   |             |            |             |   |             |             |             |   |             |             |            |   |             |            |             |   |             |             |             |   |             |            |            |                                                                                                                                                                                                                                                                                                                                                                                                                                                                                                                                                                                                                                                                                                                                                                                                                                                                                                                                                                                                                                                                                                                                                                                                                                                                                                                                                                                                                                                                                                                                                                                                                                                                                                                                                                                                                                                                                                                                                                                                                                                                                                                                                                                                                                                                                                                                                                                                                                                                                                                        |            |            |            |             |            |            |            |                                                                                                                                                                                                                                                                                                                                                                                                                                                                                                                                                                                                                                                                                                                                                                                                                                                                                                                                                                                                                                                                                                                                                                                                                                                                                                                                                                                                                                                                                                                                                                                                                                                                                                                                                                                                                                                                                                                                                                                                                                                                                                                                                                                                                                                                                                                                                                                                                                                                                                                                                                                             |   |            |             |             |   |            |             |             |   |            |             |             |   |            |             |             |   |            |             |             |   |            |             |             |   |            |             |            |   |            |             |            |   |            |            |             |   |            |             |             |   |            |             |             |   |             |             |             |   |             |             |             |   |             |            |             |   |             |             |             |   |             |             |             |   |             |            |             |   |             |             |             |   |             |             |             |   |             |             |             |   |             |             |             |   |             |             |             |   |             |             |             |   |             |            |             |   |             |             |             |   |             |             |            |   |             |             |             |   |             |            |             |   |            |            |            |   |            |            |            |   |            |            |            |
| C                                                                                                                                                                                                                                                                                                                                                                                                                                                                                                                                                                                                                                                                                                                                                                                                                                                                                                                                                                                                                                                                                                                                                                                                                                                                                                                                                                                                                                                                                                                                                                                                                                                                                                                                                                                                                                                                                                                                                                                                                                                                                                                                                                                                                                                                                                                                               | -0.19219000 | 0.18915000                                                                         | -0.00489900                                                                          |             |   |            |            |             |   |            |             |             |   |            |             |             |   |            |             |             |   |            |             |             |   |            |            |             |   |            |             |             |   |            |             |            |   |            |             |             |   |            |            |             |   |            |             |             |   |            |             |             |   |             |             |             |   |             |             |             |   |             |             |            |   |             |             |             |   |             |             |             |   |             |             |             |   |             |             |             |   |             |             |            |   |             |             |             |   |             |            |             |   |             |             |             |   |             |            |             |   |             |            |             |   |             |             |             |                                                                                                                                                                                                                                                                                                                                                                                                                                                                                                                                                                                                                                                                                                                                                                                                                                                                                                                                                                                                                                                                                                                                                                                                                                                                                                                                                                                                                                                                                                                                                                                                                                                                                                                                                                                                                                                                                                                                                                                                                                                                                                                                                                                                                                                                                                                                                                                                                                                                                                                     |            |             |            |                                                                                                                                                                                                                                                                                                                                                                                                                                                                                                                                                                                                                                                                                                                                                                                                                                                                                                                                                                                                                                                                                                                                                                                                                                                                                                                                                                                                                                                                                                                                                                                                                                                                                                                                                                                                                                                                                                                                                                                                                                                                                                                                                                                                                                                                                                                                                                                                                                                                                                                                                                                               |   |            |             |             |   |            |             |             |   |            |             |             |   |            |             |             |   |            |             |             |   |            |             |             |   |            |             |            |   |            |             |            |   |            |             |             |   |            |             |             |   |            |             |             |   |             |             |             |   |             |             |             |   |             |             |             |   |             |            |             |   |             |             |             |   |             |             |             |   |             |             |             |   |             |            |             |   |             |             |             |   |             |             |             |   |             |             |             |   |             |             |             |   |             |            |             |   |             |             |             |   |             |             |            |   |             |            |             |   |             |             |             |   |             |            |            |                                                                                                                                                                                                                                                                                                                                                                                                                                                                                                                                                                                                                                                                                                                                                                                                                                                                                                                                                                                                                                                                                                                                                                                                                                                                                                                                                                                                                                                                                                                                                                                                                                                                                                                                                                                                                                                                                                                                                                                                                                                                                                                                                                                                                                                                                                                                                                                                                                                                                                                        |            |            |            |             |            |            |            |                                                                                                                                                                                                                                                                                                                                                                                                                                                                                                                                                                                                                                                                                                                                                                                                                                                                                                                                                                                                                                                                                                                                                                                                                                                                                                                                                                                                                                                                                                                                                                                                                                                                                                                                                                                                                                                                                                                                                                                                                                                                                                                                                                                                                                                                                                                                                                                                                                                                                                                                                                                             |   |            |             |             |   |            |             |             |   |            |             |             |   |            |             |             |   |            |             |             |   |            |             |             |   |            |             |            |   |            |             |            |   |            |            |             |   |            |             |             |   |            |             |             |   |             |             |             |   |             |             |             |   |             |            |             |   |             |             |             |   |             |             |             |   |             |            |             |   |             |             |             |   |             |             |             |   |             |             |             |   |             |             |             |   |             |             |             |   |             |             |             |   |             |            |             |   |             |             |             |   |             |             |            |   |             |             |             |   |             |            |             |   |            |            |            |   |            |            |            |   |            |            |            |
| H                                                                                                                                                                                                                                                                                                                                                                                                                                                                                                                                                                                                                                                                                                                                                                                                                                                                                                                                                                                                                                                                                                                                                                                                                                                                                                                                                                                                                                                                                                                                                                                                                                                                                                                                                                                                                                                                                                                                                                                                                                                                                                                                                                                                                                                                                                                                               | -0.23895400 | -0.62279200                                                                        | 0.70933500                                                                           |             |   |            |            |             |   |            |             |             |   |            |             |             |   |            |             |             |   |            |             |             |   |            |            |             |   |            |             |             |   |            |             |            |   |            |             |             |   |            |            |             |   |            |             |             |   |            |             |             |   |             |             |             |   |             |             |             |   |             |             |            |   |             |             |             |   |             |             |             |   |             |             |             |   |             |             |             |   |             |             |            |   |             |             |             |   |             |            |             |   |             |             |             |   |             |            |             |   |             |            |             |   |             |             |             |                                                                                                                                                                                                                                                                                                                                                                                                                                                                                                                                                                                                                                                                                                                                                                                                                                                                                                                                                                                                                                                                                                                                                                                                                                                                                                                                                                                                                                                                                                                                                                                                                                                                                                                                                                                                                                                                                                                                                                                                                                                                                                                                                                                                                                                                                                                                                                                                                                                                                                                     |            |             |            |                                                                                                                                                                                                                                                                                                                                                                                                                                                                                                                                                                                                                                                                                                                                                                                                                                                                                                                                                                                                                                                                                                                                                                                                                                                                                                                                                                                                                                                                                                                                                                                                                                                                                                                                                                                                                                                                                                                                                                                                                                                                                                                                                                                                                                                                                                                                                                                                                                                                                                                                                                                               |   |            |             |             |   |            |             |             |   |            |             |             |   |            |             |             |   |            |             |             |   |            |             |             |   |            |             |            |   |            |             |            |   |            |             |             |   |            |             |             |   |            |             |             |   |             |             |             |   |             |             |             |   |             |             |             |   |             |            |             |   |             |             |             |   |             |             |             |   |             |             |             |   |             |            |             |   |             |             |             |   |             |             |             |   |             |             |             |   |             |             |             |   |             |            |             |   |             |             |             |   |             |             |            |   |             |            |             |   |             |             |             |   |             |            |            |                                                                                                                                                                                                                                                                                                                                                                                                                                                                                                                                                                                                                                                                                                                                                                                                                                                                                                                                                                                                                                                                                                                                                                                                                                                                                                                                                                                                                                                                                                                                                                                                                                                                                                                                                                                                                                                                                                                                                                                                                                                                                                                                                                                                                                                                                                                                                                                                                                                                                                                        |            |            |            |             |            |            |            |                                                                                                                                                                                                                                                                                                                                                                                                                                                                                                                                                                                                                                                                                                                                                                                                                                                                                                                                                                                                                                                                                                                                                                                                                                                                                                                                                                                                                                                                                                                                                                                                                                                                                                                                                                                                                                                                                                                                                                                                                                                                                                                                                                                                                                                                                                                                                                                                                                                                                                                                                                                             |   |            |             |             |   |            |             |             |   |            |             |             |   |            |             |             |   |            |             |             |   |            |             |             |   |            |             |            |   |            |             |            |   |            |            |             |   |            |             |             |   |            |             |             |   |             |             |             |   |             |             |             |   |             |            |             |   |             |             |             |   |             |             |             |   |             |            |             |   |             |             |             |   |             |             |             |   |             |             |             |   |             |             |             |   |             |             |             |   |             |             |             |   |             |            |             |   |             |             |             |   |             |             |            |   |             |             |             |   |             |            |             |   |            |            |            |   |            |            |            |   |            |            |            |
| C                                                                                                                                                                                                                                                                                                                                                                                                                                                                                                                                                                                                                                                                                                                                                                                                                                                                                                                                                                                                                                                                                                                                                                                                                                                                                                                                                                                                                                                                                                                                                                                                                                                                                                                                                                                                                                                                                                                                                                                                                                                                                                                                                                                                                                                                                                                                               | -1.33801000 | 0.64517800                                                                         | -0.59768100                                                                          |             |   |            |            |             |   |            |             |             |   |            |             |             |   |            |             |             |   |            |             |             |   |            |            |             |   |            |             |             |   |            |             |            |   |            |             |             |   |            |            |             |   |            |             |             |   |            |             |             |   |             |             |             |   |             |             |             |   |             |             |            |   |             |             |             |   |             |             |             |   |             |             |             |   |             |             |             |   |             |             |            |   |             |             |             |   |             |            |             |   |             |             |             |   |             |            |             |   |             |            |             |   |             |             |             |                                                                                                                                                                                                                                                                                                                                                                                                                                                                                                                                                                                                                                                                                                                                                                                                                                                                                                                                                                                                                                                                                                                                                                                                                                                                                                                                                                                                                                                                                                                                                                                                                                                                                                                                                                                                                                                                                                                                                                                                                                                                                                                                                                                                                                                                                                                                                                                                                                                                                                                     |            |             |            |                                                                                                                                                                                                                                                                                                                                                                                                                                                                                                                                                                                                                                                                                                                                                                                                                                                                                                                                                                                                                                                                                                                                                                                                                                                                                                                                                                                                                                                                                                                                                                                                                                                                                                                                                                                                                                                                                                                                                                                                                                                                                                                                                                                                                                                                                                                                                                                                                                                                                                                                                                                               |   |            |             |             |   |            |             |             |   |            |             |             |   |            |             |             |   |            |             |             |   |            |             |             |   |            |             |            |   |            |             |            |   |            |             |             |   |            |             |             |   |            |             |             |   |             |             |             |   |             |             |             |   |             |             |             |   |             |            |             |   |             |             |             |   |             |             |             |   |             |             |             |   |             |            |             |   |             |             |             |   |             |             |             |   |             |             |             |   |             |             |             |   |             |            |             |   |             |             |             |   |             |             |            |   |             |            |             |   |             |             |             |   |             |            |            |                                                                                                                                                                                                                                                                                                                                                                                                                                                                                                                                                                                                                                                                                                                                                                                                                                                                                                                                                                                                                                                                                                                                                                                                                                                                                                                                                                                                                                                                                                                                                                                                                                                                                                                                                                                                                                                                                                                                                                                                                                                                                                                                                                                                                                                                                                                                                                                                                                                                                                                        |            |            |            |             |            |            |            |                                                                                                                                                                                                                                                                                                                                                                                                                                                                                                                                                                                                                                                                                                                                                                                                                                                                                                                                                                                                                                                                                                                                                                                                                                                                                                                                                                                                                                                                                                                                                                                                                                                                                                                                                                                                                                                                                                                                                                                                                                                                                                                                                                                                                                                                                                                                                                                                                                                                                                                                                                                             |   |            |             |             |   |            |             |             |   |            |             |             |   |            |             |             |   |            |             |             |   |            |             |             |   |            |             |            |   |            |             |            |   |            |            |             |   |            |             |             |   |            |             |             |   |             |             |             |   |             |             |             |   |             |            |             |   |             |             |             |   |             |             |             |   |             |            |             |   |             |             |             |   |             |             |             |   |             |             |             |   |             |             |             |   |             |             |             |   |             |             |             |   |             |            |             |   |             |             |             |   |             |             |            |   |             |             |             |   |             |            |             |   |            |            |            |   |            |            |            |   |            |            |            |
| O                                                                                                                                                                                                                                                                                                                                                                                                                                                                                                                                                                                                                                                                                                                                                                                                                                                                                                                                                                                                                                                                                                                                                                                                                                                                                                                                                                                                                                                                                                                                                                                                                                                                                                                                                                                                                                                                                                                                                                                                                                                                                                                                                                                                                                                                                                                                               | -1.42702700 | 1.65022900                                                                         | -1.39394000                                                                          |             |   |            |            |             |   |            |             |             |   |            |             |             |   |            |             |             |   |            |             |             |   |            |            |             |   |            |             |             |   |            |             |            |   |            |             |             |   |            |            |             |   |            |             |             |   |            |             |             |   |             |             |             |   |             |             |             |   |             |             |            |   |             |             |             |   |             |             |             |   |             |             |             |   |             |             |             |   |             |             |            |   |             |             |             |   |             |            |             |   |             |             |             |   |             |            |             |   |             |            |             |   |             |             |             |                                                                                                                                                                                                                                                                                                                                                                                                                                                                                                                                                                                                                                                                                                                                                                                                                                                                                                                                                                                                                                                                                                                                                                                                                                                                                                                                                                                                                                                                                                                                                                                                                                                                                                                                                                                                                                                                                                                                                                                                                                                                                                                                                                                                                                                                                                                                                                                                                                                                                                                     |            |             |            |                                                                                                                                                                                                                                                                                                                                                                                                                                                                                                                                                                                                                                                                                                                                                                                                                                                                                                                                                                                                                                                                                                                                                                                                                                                                                                                                                                                                                                                                                                                                                                                                                                                                                                                                                                                                                                                                                                                                                                                                                                                                                                                                                                                                                                                                                                                                                                                                                                                                                                                                                                                               |   |            |             |             |   |            |             |             |   |            |             |             |   |            |             |             |   |            |             |             |   |            |             |             |   |            |             |            |   |            |             |            |   |            |             |             |   |            |             |             |   |            |             |             |   |             |             |             |   |             |             |             |   |             |             |             |   |             |            |             |   |             |             |             |   |             |             |             |   |             |             |             |   |             |            |             |   |             |             |             |   |             |             |             |   |             |             |             |   |             |             |             |   |             |            |             |   |             |             |             |   |             |             |            |   |             |            |             |   |             |             |             |   |             |            |            |                                                                                                                                                                                                                                                                                                                                                                                                                                                                                                                                                                                                                                                                                                                                                                                                                                                                                                                                                                                                                                                                                                                                                                                                                                                                                                                                                                                                                                                                                                                                                                                                                                                                                                                                                                                                                                                                                                                                                                                                                                                                                                                                                                                                                                                                                                                                                                                                                                                                                                                        |            |            |            |             |            |            |            |                                                                                                                                                                                                                                                                                                                                                                                                                                                                                                                                                                                                                                                                                                                                                                                                                                                                                                                                                                                                                                                                                                                                                                                                                                                                                                                                                                                                                                                                                                                                                                                                                                                                                                                                                                                                                                                                                                                                                                                                                                                                                                                                                                                                                                                                                                                                                                                                                                                                                                                                                                                             |   |            |             |             |   |            |             |             |   |            |             |             |   |            |             |             |   |            |             |             |   |            |             |             |   |            |             |            |   |            |             |            |   |            |            |             |   |            |             |             |   |            |             |             |   |             |             |             |   |             |             |             |   |             |            |             |   |             |             |             |   |             |             |             |   |             |            |             |   |             |             |             |   |             |             |             |   |             |             |             |   |             |             |             |   |             |             |             |   |             |             |             |   |             |            |             |   |             |             |             |   |             |             |            |   |             |             |             |   |             |            |             |   |            |            |            |   |            |            |            |   |            |            |            |
| C                                                                                                                                                                                                                                                                                                                                                                                                                                                                                                                                                                                                                                                                                                                                                                                                                                                                                                                                                                                                                                                                                                                                                                                                                                                                                                                                                                                                                                                                                                                                                                                                                                                                                                                                                                                                                                                                                                                                                                                                                                                                                                                                                                                                                                                                                                                                               | -2.63643000 | -0.06291400                                                                        | -0.26317300                                                                          |             |   |            |            |             |   |            |             |             |   |            |             |             |   |            |             |             |   |            |             |             |   |            |            |             |   |            |             |             |   |            |             |            |   |            |             |             |   |            |            |             |   |            |             |             |   |            |             |             |   |             |             |             |   |             |             |             |   |             |             |            |   |             |             |             |   |             |             |             |   |             |             |             |   |             |             |             |   |             |             |            |   |             |             |             |   |             |            |             |   |             |             |             |   |             |            |             |   |             |            |             |   |             |             |             |                                                                                                                                                                                                                                                                                                                                                                                                                                                                                                                                                                                                                                                                                                                                                                                                                                                                                                                                                                                                                                                                                                                                                                                                                                                                                                                                                                                                                                                                                                                                                                                                                                                                                                                                                                                                                                                                                                                                                                                                                                                                                                                                                                                                                                                                                                                                                                                                                                                                                                                     |            |             |            |                                                                                                                                                                                                                                                                                                                                                                                                                                                                                                                                                                                                                                                                                                                                                                                                                                                                                                                                                                                                                                                                                                                                                                                                                                                                                                                                                                                                                                                                                                                                                                                                                                                                                                                                                                                                                                                                                                                                                                                                                                                                                                                                                                                                                                                                                                                                                                                                                                                                                                                                                                                               |   |            |             |             |   |            |             |             |   |            |             |             |   |            |             |             |   |            |             |             |   |            |             |             |   |            |             |            |   |            |             |            |   |            |             |             |   |            |             |             |   |            |             |             |   |             |             |             |   |             |             |             |   |             |             |             |   |             |            |             |   |             |             |             |   |             |             |             |   |             |             |             |   |             |            |             |   |             |             |             |   |             |             |             |   |             |             |             |   |             |             |             |   |             |            |             |   |             |             |             |   |             |             |            |   |             |            |             |   |             |             |             |   |             |            |            |                                                                                                                                                                                                                                                                                                                                                                                                                                                                                                                                                                                                                                                                                                                                                                                                                                                                                                                                                                                                                                                                                                                                                                                                                                                                                                                                                                                                                                                                                                                                                                                                                                                                                                                                                                                                                                                                                                                                                                                                                                                                                                                                                                                                                                                                                                                                                                                                                                                                                                                        |            |            |            |             |            |            |            |                                                                                                                                                                                                                                                                                                                                                                                                                                                                                                                                                                                                                                                                                                                                                                                                                                                                                                                                                                                                                                                                                                                                                                                                                                                                                                                                                                                                                                                                                                                                                                                                                                                                                                                                                                                                                                                                                                                                                                                                                                                                                                                                                                                                                                                                                                                                                                                                                                                                                                                                                                                             |   |            |             |             |   |            |             |             |   |            |             |             |   |            |             |             |   |            |             |             |   |            |             |             |   |            |             |            |   |            |             |            |   |            |            |             |   |            |             |             |   |            |             |             |   |             |             |             |   |             |             |             |   |             |            |             |   |             |             |             |   |             |             |             |   |             |            |             |   |             |             |             |   |             |             |             |   |             |             |             |   |             |             |             |   |             |             |             |   |             |             |             |   |             |            |             |   |             |             |             |   |             |             |            |   |             |             |             |   |             |            |             |   |            |            |            |   |            |            |            |   |            |            |            |
| C                                                                                                                                                                                                                                                                                                                                                                                                                                                                                                                                                                                                                                                                                                                                                                                                                                                                                                                                                                                                                                                                                                                                                                                                                                                                                                                                                                                                                                                                                                                                                                                                                                                                                                                                                                                                                                                                                                                                                                                                                                                                                                                                                                                                                                                                                                                                               | -3.83100700 | 0.65328400                                                                         | -0.34175800                                                                          |             |   |            |            |             |   |            |             |             |   |            |             |             |   |            |             |             |   |            |             |             |   |            |            |             |   |            |             |             |   |            |             |            |   |            |             |             |   |            |            |             |   |            |             |             |   |            |             |             |   |             |             |             |   |             |             |             |   |             |             |            |   |             |             |             |   |             |             |             |   |             |             |             |   |             |             |             |   |             |             |            |   |             |             |             |   |             |            |             |   |             |             |             |   |             |            |             |   |             |            |             |   |             |             |             |                                                                                                                                                                                                                                                                                                                                                                                                                                                                                                                                                                                                                                                                                                                                                                                                                                                                                                                                                                                                                                                                                                                                                                                                                                                                                                                                                                                                                                                                                                                                                                                                                                                                                                                                                                                                                                                                                                                                                                                                                                                                                                                                                                                                                                                                                                                                                                                                                                                                                                                     |            |             |            |                                                                                                                                                                                                                                                                                                                                                                                                                                                                                                                                                                                                                                                                                                                                                                                                                                                                                                                                                                                                                                                                                                                                                                                                                                                                                                                                                                                                                                                                                                                                                                                                                                                                                                                                                                                                                                                                                                                                                                                                                                                                                                                                                                                                                                                                                                                                                                                                                                                                                                                                                                                               |   |            |             |             |   |            |             |             |   |            |             |             |   |            |             |             |   |            |             |             |   |            |             |             |   |            |             |            |   |            |             |            |   |            |             |             |   |            |             |             |   |            |             |             |   |             |             |             |   |             |             |             |   |             |             |             |   |             |            |             |   |             |             |             |   |             |             |             |   |             |             |             |   |             |            |             |   |             |             |             |   |             |             |             |   |             |             |             |   |             |             |             |   |             |            |             |   |             |             |             |   |             |             |            |   |             |            |             |   |             |             |             |   |             |            |            |                                                                                                                                                                                                                                                                                                                                                                                                                                                                                                                                                                                                                                                                                                                                                                                                                                                                                                                                                                                                                                                                                                                                                                                                                                                                                                                                                                                                                                                                                                                                                                                                                                                                                                                                                                                                                                                                                                                                                                                                                                                                                                                                                                                                                                                                                                                                                                                                                                                                                                                        |            |            |            |             |            |            |            |                                                                                                                                                                                                                                                                                                                                                                                                                                                                                                                                                                                                                                                                                                                                                                                                                                                                                                                                                                                                                                                                                                                                                                                                                                                                                                                                                                                                                                                                                                                                                                                                                                                                                                                                                                                                                                                                                                                                                                                                                                                                                                                                                                                                                                                                                                                                                                                                                                                                                                                                                                                             |   |            |             |             |   |            |             |             |   |            |             |             |   |            |             |             |   |            |             |             |   |            |             |             |   |            |             |            |   |            |             |            |   |            |            |             |   |            |             |             |   |            |             |             |   |             |             |             |   |             |             |             |   |             |            |             |   |             |             |             |   |             |             |             |   |             |            |             |   |             |             |             |   |             |             |             |   |             |             |             |   |             |             |             |   |             |             |             |   |             |             |             |   |             |            |             |   |             |             |             |   |             |             |            |   |             |             |             |   |             |            |             |   |            |            |            |   |            |            |            |   |            |            |            |
| C                                                                                                                                                                                                                                                                                                                                                                                                                                                                                                                                                                                                                                                                                                                                                                                                                                                                                                                                                                                                                                                                                                                                                                                                                                                                                                                                                                                                                                                                                                                                                                                                                                                                                                                                                                                                                                                                                                                                                                                                                                                                                                                                                                                                                                                                                                                                               | -2.71286800 | -1.40637200                                                                        | 0.11179000                                                                           |             |   |            |            |             |   |            |             |             |   |            |             |             |   |            |             |             |   |            |             |             |   |            |            |             |   |            |             |             |   |            |             |            |   |            |             |             |   |            |            |             |   |            |             |             |   |            |             |             |   |             |             |             |   |             |             |             |   |             |             |            |   |             |             |             |   |             |             |             |   |             |             |             |   |             |             |             |   |             |             |            |   |             |             |             |   |             |            |             |   |             |             |             |   |             |            |             |   |             |            |             |   |             |             |             |                                                                                                                                                                                                                                                                                                                                                                                                                                                                                                                                                                                                                                                                                                                                                                                                                                                                                                                                                                                                                                                                                                                                                                                                                                                                                                                                                                                                                                                                                                                                                                                                                                                                                                                                                                                                                                                                                                                                                                                                                                                                                                                                                                                                                                                                                                                                                                                                                                                                                                                     |            |             |            |                                                                                                                                                                                                                                                                                                                                                                                                                                                                                                                                                                                                                                                                                                                                                                                                                                                                                                                                                                                                                                                                                                                                                                                                                                                                                                                                                                                                                                                                                                                                                                                                                                                                                                                                                                                                                                                                                                                                                                                                                                                                                                                                                                                                                                                                                                                                                                                                                                                                                                                                                                                               |   |            |             |             |   |            |             |             |   |            |             |             |   |            |             |             |   |            |             |             |   |            |             |             |   |            |             |            |   |            |             |            |   |            |             |             |   |            |             |             |   |            |             |             |   |             |             |             |   |             |             |             |   |             |             |             |   |             |            |             |   |             |             |             |   |             |             |             |   |             |             |             |   |             |            |             |   |             |             |             |   |             |             |             |   |             |             |             |   |             |             |             |   |             |            |             |   |             |             |             |   |             |             |            |   |             |            |             |   |             |             |             |   |             |            |            |                                                                                                                                                                                                                                                                                                                                                                                                                                                                                                                                                                                                                                                                                                                                                                                                                                                                                                                                                                                                                                                                                                                                                                                                                                                                                                                                                                                                                                                                                                                                                                                                                                                                                                                                                                                                                                                                                                                                                                                                                                                                                                                                                                                                                                                                                                                                                                                                                                                                                                                        |            |            |            |             |            |            |            |                                                                                                                                                                                                                                                                                                                                                                                                                                                                                                                                                                                                                                                                                                                                                                                                                                                                                                                                                                                                                                                                                                                                                                                                                                                                                                                                                                                                                                                                                                                                                                                                                                                                                                                                                                                                                                                                                                                                                                                                                                                                                                                                                                                                                                                                                                                                                                                                                                                                                                                                                                                             |   |            |             |             |   |            |             |             |   |            |             |             |   |            |             |             |   |            |             |             |   |            |             |             |   |            |             |            |   |            |             |            |   |            |            |             |   |            |             |             |   |            |             |             |   |             |             |             |   |             |             |             |   |             |            |             |   |             |             |             |   |             |             |             |   |             |            |             |   |             |             |             |   |             |             |             |   |             |             |             |   |             |             |             |   |             |             |             |   |             |             |             |   |             |            |             |   |             |             |             |   |             |             |            |   |             |             |             |   |             |            |             |   |            |            |            |   |            |            |            |   |            |            |            |
| C                                                                                                                                                                                                                                                                                                                                                                                                                                                                                                                                                                                                                                                                                                                                                                                                                                                                                                                                                                                                                                                                                                                                                                                                                                                                                                                                                                                                                                                                                                                                                                                                                                                                                                                                                                                                                                                                                                                                                                                                                                                                                                                                                                                                                                                                                                                                               | -5.04938000 | 0.06615800                                                                         | -0.03140400                                                                          |             |   |            |            |             |   |            |             |             |   |            |             |             |   |            |             |             |   |            |             |             |   |            |            |             |   |            |             |             |   |            |             |            |   |            |             |             |   |            |            |             |   |            |             |             |   |            |             |             |   |             |             |             |   |             |             |             |   |             |             |            |   |             |             |             |   |             |             |             |   |             |             |             |   |             |             |             |   |             |             |            |   |             |             |             |   |             |            |             |   |             |             |             |   |             |            |             |   |             |            |             |   |             |             |             |                                                                                                                                                                                                                                                                                                                                                                                                                                                                                                                                                                                                                                                                                                                                                                                                                                                                                                                                                                                                                                                                                                                                                                                                                                                                                                                                                                                                                                                                                                                                                                                                                                                                                                                                                                                                                                                                                                                                                                                                                                                                                                                                                                                                                                                                                                                                                                                                                                                                                                                     |            |             |            |                                                                                                                                                                                                                                                                                                                                                                                                                                                                                                                                                                                                                                                                                                                                                                                                                                                                                                                                                                                                                                                                                                                                                                                                                                                                                                                                                                                                                                                                                                                                                                                                                                                                                                                                                                                                                                                                                                                                                                                                                                                                                                                                                                                                                                                                                                                                                                                                                                                                                                                                                                                               |   |            |             |             |   |            |             |             |   |            |             |             |   |            |             |             |   |            |             |             |   |            |             |             |   |            |             |            |   |            |             |            |   |            |             |             |   |            |             |             |   |            |             |             |   |             |             |             |   |             |             |             |   |             |             |             |   |             |            |             |   |             |             |             |   |             |             |             |   |             |             |             |   |             |            |             |   |             |             |             |   |             |             |             |   |             |             |             |   |             |             |             |   |             |            |             |   |             |             |             |   |             |             |            |   |             |            |             |   |             |             |             |   |             |            |            |                                                                                                                                                                                                                                                                                                                                                                                                                                                                                                                                                                                                                                                                                                                                                                                                                                                                                                                                                                                                                                                                                                                                                                                                                                                                                                                                                                                                                                                                                                                                                                                                                                                                                                                                                                                                                                                                                                                                                                                                                                                                                                                                                                                                                                                                                                                                                                                                                                                                                                                        |            |            |            |             |            |            |            |                                                                                                                                                                                                                                                                                                                                                                                                                                                                                                                                                                                                                                                                                                                                                                                                                                                                                                                                                                                                                                                                                                                                                                                                                                                                                                                                                                                                                                                                                                                                                                                                                                                                                                                                                                                                                                                                                                                                                                                                                                                                                                                                                                                                                                                                                                                                                                                                                                                                                                                                                                                             |   |            |             |             |   |            |             |             |   |            |             |             |   |            |             |             |   |            |             |             |   |            |             |             |   |            |             |            |   |            |             |            |   |            |            |             |   |            |             |             |   |            |             |             |   |             |             |             |   |             |             |             |   |             |            |             |   |             |             |             |   |             |             |             |   |             |            |             |   |             |             |             |   |             |             |             |   |             |             |             |   |             |             |             |   |             |             |             |   |             |             |             |   |             |            |             |   |             |             |             |   |             |             |            |   |             |             |             |   |             |            |             |   |            |            |            |   |            |            |            |   |            |            |            |
| H                                                                                                                                                                                                                                                                                                                                                                                                                                                                                                                                                                                                                                                                                                                                                                                                                                                                                                                                                                                                                                                                                                                                                                                                                                                                                                                                                                                                                                                                                                                                                                                                                                                                                                                                                                                                                                                                                                                                                                                                                                                                                                                                                                                                                                                                                                                                               | -3.78333200 | 1.68893800                                                                         | -0.65346100                                                                          |             |   |            |            |             |   |            |             |             |   |            |             |             |   |            |             |             |   |            |             |             |   |            |            |             |   |            |             |             |   |            |             |            |   |            |             |             |   |            |            |             |   |            |             |             |   |            |             |             |   |             |             |             |   |             |             |             |   |             |             |            |   |             |             |             |   |             |             |             |   |             |             |             |   |             |             |             |   |             |             |            |   |             |             |             |   |             |            |             |   |             |             |             |   |             |            |             |   |             |            |             |   |             |             |             |                                                                                                                                                                                                                                                                                                                                                                                                                                                                                                                                                                                                                                                                                                                                                                                                                                                                                                                                                                                                                                                                                                                                                                                                                                                                                                                                                                                                                                                                                                                                                                                                                                                                                                                                                                                                                                                                                                                                                                                                                                                                                                                                                                                                                                                                                                                                                                                                                                                                                                                     |            |             |            |                                                                                                                                                                                                                                                                                                                                                                                                                                                                                                                                                                                                                                                                                                                                                                                                                                                                                                                                                                                                                                                                                                                                                                                                                                                                                                                                                                                                                                                                                                                                                                                                                                                                                                                                                                                                                                                                                                                                                                                                                                                                                                                                                                                                                                                                                                                                                                                                                                                                                                                                                                                               |   |            |             |             |   |            |             |             |   |            |             |             |   |            |             |             |   |            |             |             |   |            |             |             |   |            |             |            |   |            |             |            |   |            |             |             |   |            |             |             |   |            |             |             |   |             |             |             |   |             |             |             |   |             |             |             |   |             |            |             |   |             |             |             |   |             |             |             |   |             |             |             |   |             |            |             |   |             |             |             |   |             |             |             |   |             |             |             |   |             |             |             |   |             |            |             |   |             |             |             |   |             |             |            |   |             |            |             |   |             |             |             |   |             |            |            |                                                                                                                                                                                                                                                                                                                                                                                                                                                                                                                                                                                                                                                                                                                                                                                                                                                                                                                                                                                                                                                                                                                                                                                                                                                                                                                                                                                                                                                                                                                                                                                                                                                                                                                                                                                                                                                                                                                                                                                                                                                                                                                                                                                                                                                                                                                                                                                                                                                                                                                        |            |            |            |             |            |            |            |                                                                                                                                                                                                                                                                                                                                                                                                                                                                                                                                                                                                                                                                                                                                                                                                                                                                                                                                                                                                                                                                                                                                                                                                                                                                                                                                                                                                                                                                                                                                                                                                                                                                                                                                                                                                                                                                                                                                                                                                                                                                                                                                                                                                                                                                                                                                                                                                                                                                                                                                                                                             |   |            |             |             |   |            |             |             |   |            |             |             |   |            |             |             |   |            |             |             |   |            |             |             |   |            |             |            |   |            |             |            |   |            |            |             |   |            |             |             |   |            |             |             |   |             |             |             |   |             |             |             |   |             |            |             |   |             |             |             |   |             |             |             |   |             |            |             |   |             |             |             |   |             |             |             |   |             |             |             |   |             |             |             |   |             |             |             |   |             |             |             |   |             |            |             |   |             |             |             |   |             |             |            |   |             |             |             |   |             |            |             |   |            |            |            |   |            |            |            |   |            |            |            |
| C                                                                                                                                                                                                                                                                                                                                                                                                                                                                                                                                                                                                                                                                                                                                                                                                                                                                                                                                                                                                                                                                                                                                                                                                                                                                                                                                                                                                                                                                                                                                                                                                                                                                                                                                                                                                                                                                                                                                                                                                                                                                                                                                                                                                                                                                                                                                               | -3.92844700 | -2.00125600                                                                        | 0.41691200                                                                           |             |   |            |            |             |   |            |             |             |   |            |             |             |   |            |             |             |   |            |             |             |   |            |            |             |   |            |             |             |   |            |             |            |   |            |             |             |   |            |            |             |   |            |             |             |   |            |             |             |   |             |             |             |   |             |             |             |   |             |             |            |   |             |             |             |   |             |             |             |   |             |             |             |   |             |             |             |   |             |             |            |   |             |             |             |   |             |            |             |   |             |             |             |   |             |            |             |   |             |            |             |   |             |             |             |                                                                                                                                                                                                                                                                                                                                                                                                                                                                                                                                                                                                                                                                                                                                                                                                                                                                                                                                                                                                                                                                                                                                                                                                                                                                                                                                                                                                                                                                                                                                                                                                                                                                                                                                                                                                                                                                                                                                                                                                                                                                                                                                                                                                                                                                                                                                                                                                                                                                                                                     |            |             |            |                                                                                                                                                                                                                                                                                                                                                                                                                                                                                                                                                                                                                                                                                                                                                                                                                                                                                                                                                                                                                                                                                                                                                                                                                                                                                                                                                                                                                                                                                                                                                                                                                                                                                                                                                                                                                                                                                                                                                                                                                                                                                                                                                                                                                                                                                                                                                                                                                                                                                                                                                                                               |   |            |             |             |   |            |             |             |   |            |             |             |   |            |             |             |   |            |             |             |   |            |             |             |   |            |             |            |   |            |             |            |   |            |             |             |   |            |             |             |   |            |             |             |   |             |             |             |   |             |             |             |   |             |             |             |   |             |            |             |   |             |             |             |   |             |             |             |   |             |             |             |   |             |            |             |   |             |             |             |   |             |             |             |   |             |             |             |   |             |             |             |   |             |            |             |   |             |             |             |   |             |             |            |   |             |            |             |   |             |             |             |   |             |            |            |                                                                                                                                                                                                                                                                                                                                                                                                                                                                                                                                                                                                                                                                                                                                                                                                                                                                                                                                                                                                                                                                                                                                                                                                                                                                                                                                                                                                                                                                                                                                                                                                                                                                                                                                                                                                                                                                                                                                                                                                                                                                                                                                                                                                                                                                                                                                                                                                                                                                                                                        |            |            |            |             |            |            |            |                                                                                                                                                                                                                                                                                                                                                                                                                                                                                                                                                                                                                                                                                                                                                                                                                                                                                                                                                                                                                                                                                                                                                                                                                                                                                                                                                                                                                                                                                                                                                                                                                                                                                                                                                                                                                                                                                                                                                                                                                                                                                                                                                                                                                                                                                                                                                                                                                                                                                                                                                                                             |   |            |             |             |   |            |             |             |   |            |             |             |   |            |             |             |   |            |             |             |   |            |             |             |   |            |             |            |   |            |             |            |   |            |            |             |   |            |             |             |   |            |             |             |   |             |             |             |   |             |             |             |   |             |            |             |   |             |             |             |   |             |             |             |   |             |            |             |   |             |             |             |   |             |             |             |   |             |             |             |   |             |             |             |   |             |             |             |   |             |             |             |   |             |            |             |   |             |             |             |   |             |             |            |   |             |             |             |   |             |            |             |   |            |            |            |   |            |            |            |   |            |            |            |
| H                                                                                                                                                                                                                                                                                                                                                                                                                                                                                                                                                                                                                                                                                                                                                                                                                                                                                                                                                                                                                                                                                                                                                                                                                                                                                                                                                                                                                                                                                                                                                                                                                                                                                                                                                                                                                                                                                                                                                                                                                                                                                                                                                                                                                                                                                                                                               | -1.80820000 | -2.00060200                                                                        | 1.04982100                                                                           |             |   |            |            |             |   |            |             |             |   |            |             |             |   |            |             |             |   |            |             |             |   |            |            |             |   |            |             |             |   |            |             |            |   |            |             |             |   |            |            |             |   |            |             |             |   |            |             |             |   |             |             |             |   |             |             |             |   |             |             |            |   |             |             |             |   |             |             |             |   |             |             |             |   |             |             |             |   |             |             |            |   |             |             |             |   |             |            |             |   |             |             |             |   |             |            |             |   |             |            |             |   |             |             |             |                                                                                                                                                                                                                                                                                                                                                                                                                                                                                                                                                                                                                                                                                                                                                                                                                                                                                                                                                                                                                                                                                                                                                                                                                                                                                                                                                                                                                                                                                                                                                                                                                                                                                                                                                                                                                                                                                                                                                                                                                                                                                                                                                                                                                                                                                                                                                                                                                                                                                                                     |            |             |            |                                                                                                                                                                                                                                                                                                                                                                                                                                                                                                                                                                                                                                                                                                                                                                                                                                                                                                                                                                                                                                                                                                                                                                                                                                                                                                                                                                                                                                                                                                                                                                                                                                                                                                                                                                                                                                                                                                                                                                                                                                                                                                                                                                                                                                                                                                                                                                                                                                                                                                                                                                                               |   |            |             |             |   |            |             |             |   |            |             |             |   |            |             |             |   |            |             |             |   |            |             |             |   |            |             |            |   |            |             |            |   |            |             |             |   |            |             |             |   |            |             |             |   |             |             |             |   |             |             |             |   |             |             |             |   |             |            |             |   |             |             |             |   |             |             |             |   |             |             |             |   |             |            |             |   |             |             |             |   |             |             |             |   |             |             |             |   |             |             |             |   |             |            |             |   |             |             |             |   |             |             |            |   |             |            |             |   |             |             |             |   |             |            |            |                                                                                                                                                                                                                                                                                                                                                                                                                                                                                                                                                                                                                                                                                                                                                                                                                                                                                                                                                                                                                                                                                                                                                                                                                                                                                                                                                                                                                                                                                                                                                                                                                                                                                                                                                                                                                                                                                                                                                                                                                                                                                                                                                                                                                                                                                                                                                                                                                                                                                                                        |            |            |            |             |            |            |            |                                                                                                                                                                                                                                                                                                                                                                                                                                                                                                                                                                                                                                                                                                                                                                                                                                                                                                                                                                                                                                                                                                                                                                                                                                                                                                                                                                                                                                                                                                                                                                                                                                                                                                                                                                                                                                                                                                                                                                                                                                                                                                                                                                                                                                                                                                                                                                                                                                                                                                                                                                                             |   |            |             |             |   |            |             |             |   |            |             |             |   |            |             |             |   |            |             |             |   |            |             |             |   |            |             |            |   |            |             |            |   |            |            |             |   |            |             |             |   |            |             |             |   |             |             |             |   |             |             |             |   |             |            |             |   |             |             |             |   |             |             |             |   |             |            |             |   |             |             |             |   |             |             |             |   |             |             |             |   |             |             |             |   |             |             |             |   |             |             |             |   |             |            |             |   |             |             |             |   |             |             |            |   |             |             |             |   |             |            |             |   |            |            |            |   |            |            |            |   |            |            |            |
| C                                                                                                                                                                                                                                                                                                                                                                                                                                                                                                                                                                                                                                                                                                                                                                                                                                                                                                                                                                                                                                                                                                                                                                                                                                                                                                                                                                                                                                                                                                                                                                                                                                                                                                                                                                                                                                                                                                                                                                                                                                                                                                                                                                                                                                                                                                                                               | -5.10552400 | -1.26668500                                                                        | 0.35239200                                                                           |             |   |            |            |             |   |            |             |             |   |            |             |             |   |            |             |             |   |            |             |             |   |            |            |             |   |            |             |             |   |            |             |            |   |            |             |             |   |            |            |             |   |            |             |             |   |            |             |             |   |             |             |             |   |             |             |             |   |             |             |            |   |             |             |             |   |             |             |             |   |             |             |             |   |             |             |             |   |             |             |            |   |             |             |             |   |             |            |             |   |             |             |             |   |             |            |             |   |             |            |             |   |             |             |             |                                                                                                                                                                                                                                                                                                                                                                                                                                                                                                                                                                                                                                                                                                                                                                                                                                                                                                                                                                                                                                                                                                                                                                                                                                                                                                                                                                                                                                                                                                                                                                                                                                                                                                                                                                                                                                                                                                                                                                                                                                                                                                                                                                                                                                                                                                                                                                                                                                                                                                                     |            |             |            |                                                                                                                                                                                                                                                                                                                                                                                                                                                                                                                                                                                                                                                                                                                                                                                                                                                                                                                                                                                                                                                                                                                                                                                                                                                                                                                                                                                                                                                                                                                                                                                                                                                                                                                                                                                                                                                                                                                                                                                                                                                                                                                                                                                                                                                                                                                                                                                                                                                                                                                                                                                               |   |            |             |             |   |            |             |             |   |            |             |             |   |            |             |             |   |            |             |             |   |            |             |             |   |            |             |            |   |            |             |            |   |            |             |             |   |            |             |             |   |            |             |             |   |             |             |             |   |             |             |             |   |             |             |             |   |             |            |             |   |             |             |             |   |             |             |             |   |             |             |             |   |             |            |             |   |             |             |             |   |             |             |             |   |             |             |             |   |             |             |             |   |             |            |             |   |             |             |             |   |             |             |            |   |             |            |             |   |             |             |             |   |             |            |            |                                                                                                                                                                                                                                                                                                                                                                                                                                                                                                                                                                                                                                                                                                                                                                                                                                                                                                                                                                                                                                                                                                                                                                                                                                                                                                                                                                                                                                                                                                                                                                                                                                                                                                                                                                                                                                                                                                                                                                                                                                                                                                                                                                                                                                                                                                                                                                                                                                                                                                                        |            |            |            |             |            |            |            |                                                                                                                                                                                                                                                                                                                                                                                                                                                                                                                                                                                                                                                                                                                                                                                                                                                                                                                                                                                                                                                                                                                                                                                                                                                                                                                                                                                                                                                                                                                                                                                                                                                                                                                                                                                                                                                                                                                                                                                                                                                                                                                                                                                                                                                                                                                                                                                                                                                                                                                                                                                             |   |            |             |             |   |            |             |             |   |            |             |             |   |            |             |             |   |            |             |             |   |            |             |             |   |            |             |            |   |            |             |            |   |            |            |             |   |            |             |             |   |            |             |             |   |             |             |             |   |             |             |             |   |             |            |             |   |             |             |             |   |             |             |             |   |             |            |             |   |             |             |             |   |             |             |             |   |             |             |             |   |             |             |             |   |             |             |             |   |             |             |             |   |             |            |             |   |             |             |             |   |             |             |            |   |             |             |             |   |             |            |             |   |            |            |            |   |            |            |            |   |            |            |            |
| H                                                                                                                                                                                                                                                                                                                                                                                                                                                                                                                                                                                                                                                                                                                                                                                                                                                                                                                                                                                                                                                                                                                                                                                                                                                                                                                                                                                                                                                                                                                                                                                                                                                                                                                                                                                                                                                                                                                                                                                                                                                                                                                                                                                                                                                                                                                                               | -5.95998800 | 0.65114300                                                                         | -0.09011100                                                                          |             |   |            |            |             |   |            |             |             |   |            |             |             |   |            |             |             |   |            |             |             |   |            |            |             |   |            |             |             |   |            |             |            |   |            |             |             |   |            |            |             |   |            |             |             |   |            |             |             |   |             |             |             |   |             |             |             |   |             |             |            |   |             |             |             |   |             |             |             |   |             |             |             |   |             |             |             |   |             |             |            |   |             |             |             |   |             |            |             |   |             |             |             |   |             |            |             |   |             |            |             |   |             |             |             |                                                                                                                                                                                                                                                                                                                                                                                                                                                                                                                                                                                                                                                                                                                                                                                                                                                                                                                                                                                                                                                                                                                                                                                                                                                                                                                                                                                                                                                                                                                                                                                                                                                                                                                                                                                                                                                                                                                                                                                                                                                                                                                                                                                                                                                                                                                                                                                                                                                                                                                     |            |             |            |                                                                                                                                                                                                                                                                                                                                                                                                                                                                                                                                                                                                                                                                                                                                                                                                                                                                                                                                                                                                                                                                                                                                                                                                                                                                                                                                                                                                                                                                                                                                                                                                                                                                                                                                                                                                                                                                                                                                                                                                                                                                                                                                                                                                                                                                                                                                                                                                                                                                                                                                                                                               |   |            |             |             |   |            |             |             |   |            |             |             |   |            |             |             |   |            |             |             |   |            |             |             |   |            |             |            |   |            |             |            |   |            |             |             |   |            |             |             |   |            |             |             |   |             |             |             |   |             |             |             |   |             |             |             |   |             |            |             |   |             |             |             |   |             |             |             |   |             |             |             |   |             |            |             |   |             |             |             |   |             |             |             |   |             |             |             |   |             |             |             |   |             |            |             |   |             |             |             |   |             |             |            |   |             |            |             |   |             |             |             |   |             |            |            |                                                                                                                                                                                                                                                                                                                                                                                                                                                                                                                                                                                                                                                                                                                                                                                                                                                                                                                                                                                                                                                                                                                                                                                                                                                                                                                                                                                                                                                                                                                                                                                                                                                                                                                                                                                                                                                                                                                                                                                                                                                                                                                                                                                                                                                                                                                                                                                                                                                                                                                        |            |            |            |             |            |            |            |                                                                                                                                                                                                                                                                                                                                                                                                                                                                                                                                                                                                                                                                                                                                                                                                                                                                                                                                                                                                                                                                                                                                                                                                                                                                                                                                                                                                                                                                                                                                                                                                                                                                                                                                                                                                                                                                                                                                                                                                                                                                                                                                                                                                                                                                                                                                                                                                                                                                                                                                                                                             |   |            |             |             |   |            |             |             |   |            |             |             |   |            |             |             |   |            |             |             |   |            |             |             |   |            |             |            |   |            |             |            |   |            |            |             |   |            |             |             |   |            |             |             |   |             |             |             |   |             |             |             |   |             |            |             |   |             |             |             |   |             |             |             |   |             |            |             |   |             |             |             |   |             |             |             |   |             |             |             |   |             |             |             |   |             |             |             |   |             |             |             |   |             |            |             |   |             |             |             |   |             |             |            |   |             |             |             |   |             |            |             |   |            |            |            |   |            |            |            |   |            |            |            |
| H                                                                                                                                                                                                                                                                                                                                                                                                                                                                                                                                                                                                                                                                                                                                                                                                                                                                                                                                                                                                                                                                                                                                                                                                                                                                                                                                                                                                                                                                                                                                                                                                                                                                                                                                                                                                                                                                                                                                                                                                                                                                                                                                                                                                                                                                                                                                               | -3.95809900 | -3.04742000                                                                        | 0.69844300                                                                           |             |   |            |            |             |   |            |             |             |   |            |             |             |   |            |             |             |   |            |             |             |   |            |            |             |   |            |             |             |   |            |             |            |   |            |             |             |   |            |            |             |   |            |             |             |   |            |             |             |   |             |             |             |   |             |             |             |   |             |             |            |   |             |             |             |   |             |             |             |   |             |             |             |   |             |             |             |   |             |             |            |   |             |             |             |   |             |            |             |   |             |             |             |   |             |            |             |   |             |            |             |   |             |             |             |                                                                                                                                                                                                                                                                                                                                                                                                                                                                                                                                                                                                                                                                                                                                                                                                                                                                                                                                                                                                                                                                                                                                                                                                                                                                                                                                                                                                                                                                                                                                                                                                                                                                                                                                                                                                                                                                                                                                                                                                                                                                                                                                                                                                                                                                                                                                                                                                                                                                                                                     |            |             |            |                                                                                                                                                                                                                                                                                                                                                                                                                                                                                                                                                                                                                                                                                                                                                                                                                                                                                                                                                                                                                                                                                                                                                                                                                                                                                                                                                                                                                                                                                                                                                                                                                                                                                                                                                                                                                                                                                                                                                                                                                                                                                                                                                                                                                                                                                                                                                                                                                                                                                                                                                                                               |   |            |             |             |   |            |             |             |   |            |             |             |   |            |             |             |   |            |             |             |   |            |             |             |   |            |             |            |   |            |             |            |   |            |             |             |   |            |             |             |   |            |             |             |   |             |             |             |   |             |             |             |   |             |             |             |   |             |            |             |   |             |             |             |   |             |             |             |   |             |             |             |   |             |            |             |   |             |             |             |   |             |             |             |   |             |             |             |   |             |             |             |   |             |            |             |   |             |             |             |   |             |             |            |   |             |            |             |   |             |             |             |   |             |            |            |                                                                                                                                                                                                                                                                                                                                                                                                                                                                                                                                                                                                                                                                                                                                                                                                                                                                                                                                                                                                                                                                                                                                                                                                                                                                                                                                                                                                                                                                                                                                                                                                                                                                                                                                                                                                                                                                                                                                                                                                                                                                                                                                                                                                                                                                                                                                                                                                                                                                                                                        |            |            |            |             |            |            |            |                                                                                                                                                                                                                                                                                                                                                                                                                                                                                                                                                                                                                                                                                                                                                                                                                                                                                                                                                                                                                                                                                                                                                                                                                                                                                                                                                                                                                                                                                                                                                                                                                                                                                                                                                                                                                                                                                                                                                                                                                                                                                                                                                                                                                                                                                                                                                                                                                                                                                                                                                                                             |   |            |             |             |   |            |             |             |   |            |             |             |   |            |             |             |   |            |             |             |   |            |             |             |   |            |             |            |   |            |             |            |   |            |            |             |   |            |             |             |   |            |             |             |   |             |             |             |   |             |             |             |   |             |            |             |   |             |             |             |   |             |             |             |   |             |            |             |   |             |             |             |   |             |             |             |   |             |             |             |   |             |             |             |   |             |             |             |   |             |             |             |   |             |            |             |   |             |             |             |   |             |             |            |   |             |             |             |   |             |            |             |   |            |            |            |   |            |            |            |   |            |            |            |
| H                                                                                                                                                                                                                                                                                                                                                                                                                                                                                                                                                                                                                                                                                                                                                                                                                                                                                                                                                                                                                                                                                                                                                                                                                                                                                                                                                                                                                                                                                                                                                                                                                                                                                                                                                                                                                                                                                                                                                                                                                                                                                                                                                                                                                                                                                                                                               | -6.05096000 | -1.73052600                                                                        | 0.58993100                                                                           |             |   |            |            |             |   |            |             |             |   |            |             |             |   |            |             |             |   |            |             |             |   |            |            |             |   |            |             |             |   |            |             |            |   |            |             |             |   |            |            |             |   |            |             |             |   |            |             |             |   |             |             |             |   |             |             |             |   |             |             |            |   |             |             |             |   |             |             |             |   |             |             |             |   |             |             |             |   |             |             |            |   |             |             |             |   |             |            |             |   |             |             |             |   |             |            |             |   |             |            |             |   |             |             |             |                                                                                                                                                                                                                                                                                                                                                                                                                                                                                                                                                                                                                                                                                                                                                                                                                                                                                                                                                                                                                                                                                                                                                                                                                                                                                                                                                                                                                                                                                                                                                                                                                                                                                                                                                                                                                                                                                                                                                                                                                                                                                                                                                                                                                                                                                                                                                                                                                                                                                                                     |            |             |            |                                                                                                                                                                                                                                                                                                                                                                                                                                                                                                                                                                                                                                                                                                                                                                                                                                                                                                                                                                                                                                                                                                                                                                                                                                                                                                                                                                                                                                                                                                                                                                                                                                                                                                                                                                                                                                                                                                                                                                                                                                                                                                                                                                                                                                                                                                                                                                                                                                                                                                                                                                                               |   |            |             |             |   |            |             |             |   |            |             |             |   |            |             |             |   |            |             |             |   |            |             |             |   |            |             |            |   |            |             |            |   |            |             |             |   |            |             |             |   |            |             |             |   |             |             |             |   |             |             |             |   |             |             |             |   |             |            |             |   |             |             |             |   |             |             |             |   |             |             |             |   |             |            |             |   |             |             |             |   |             |             |             |   |             |             |             |   |             |             |             |   |             |            |             |   |             |             |             |   |             |             |            |   |             |            |             |   |             |             |             |   |             |            |            |                                                                                                                                                                                                                                                                                                                                                                                                                                                                                                                                                                                                                                                                                                                                                                                                                                                                                                                                                                                                                                                                                                                                                                                                                                                                                                                                                                                                                                                                                                                                                                                                                                                                                                                                                                                                                                                                                                                                                                                                                                                                                                                                                                                                                                                                                                                                                                                                                                                                                                                        |            |            |            |             |            |            |            |                                                                                                                                                                                                                                                                                                                                                                                                                                                                                                                                                                                                                                                                                                                                                                                                                                                                                                                                                                                                                                                                                                                                                                                                                                                                                                                                                                                                                                                                                                                                                                                                                                                                                                                                                                                                                                                                                                                                                                                                                                                                                                                                                                                                                                                                                                                                                                                                                                                                                                                                                                                             |   |            |             |             |   |            |             |             |   |            |             |             |   |            |             |             |   |            |             |             |   |            |             |             |   |            |             |            |   |            |             |            |   |            |            |             |   |            |             |             |   |            |             |             |   |             |             |             |   |             |             |             |   |             |            |             |   |             |             |             |   |             |             |             |   |             |            |             |   |             |             |             |   |             |             |             |   |             |             |             |   |             |             |             |   |             |             |             |   |             |             |             |   |             |            |             |   |             |             |             |   |             |             |            |   |             |             |             |   |             |            |             |   |            |            |            |   |            |            |            |   |            |            |            |
| C                                                                                                                                                                                                                                                                                                                                                                                                                                                                                                                                                                                                                                                                                                                                                                                                                                                                                                                                                                                                                                                                                                                                                                                                                                                                                                                                                                                                                                                                                                                                                                                                                                                                                                                                                                                                                                                                                                                                                                                                                                                                                                                                                                                                                                                                                                                                               | 1.14186000  | 0.83405400                                                                         | -0.24928200                                                                          |             |   |            |            |             |   |            |             |             |   |            |             |             |   |            |             |             |   |            |             |             |   |            |            |             |   |            |             |             |   |            |             |            |   |            |             |             |   |            |            |             |   |            |             |             |   |            |             |             |   |             |             |             |   |             |             |             |   |             |             |            |   |             |             |             |   |             |             |             |   |             |             |             |   |             |             |             |   |             |             |            |   |             |             |             |   |             |            |             |   |             |             |             |   |             |            |             |   |             |            |             |   |             |             |             |                                                                                                                                                                                                                                                                                                                                                                                                                                                                                                                                                                                                                                                                                                                                                                                                                                                                                                                                                                                                                                                                                                                                                                                                                                                                                                                                                                                                                                                                                                                                                                                                                                                                                                                                                                                                                                                                                                                                                                                                                                                                                                                                                                                                                                                                                                                                                                                                                                                                                                                     |            |             |            |                                                                                                                                                                                                                                                                                                                                                                                                                                                                                                                                                                                                                                                                                                                                                                                                                                                                                                                                                                                                                                                                                                                                                                                                                                                                                                                                                                                                                                                                                                                                                                                                                                                                                                                                                                                                                                                                                                                                                                                                                                                                                                                                                                                                                                                                                                                                                                                                                                                                                                                                                                                               |   |            |             |             |   |            |             |             |   |            |             |             |   |            |             |             |   |            |             |             |   |            |             |             |   |            |             |            |   |            |             |            |   |            |             |             |   |            |             |             |   |            |             |             |   |             |             |             |   |             |             |             |   |             |             |             |   |             |            |             |   |             |             |             |   |             |             |             |   |             |             |             |   |             |            |             |   |             |             |             |   |             |             |             |   |             |             |             |   |             |             |             |   |             |            |             |   |             |             |             |   |             |             |            |   |             |            |             |   |             |             |             |   |             |            |            |                                                                                                                                                                                                                                                                                                                                                                                                                                                                                                                                                                                                                                                                                                                                                                                                                                                                                                                                                                                                                                                                                                                                                                                                                                                                                                                                                                                                                                                                                                                                                                                                                                                                                                                                                                                                                                                                                                                                                                                                                                                                                                                                                                                                                                                                                                                                                                                                                                                                                                                        |            |            |            |             |            |            |            |                                                                                                                                                                                                                                                                                                                                                                                                                                                                                                                                                                                                                                                                                                                                                                                                                                                                                                                                                                                                                                                                                                                                                                                                                                                                                                                                                                                                                                                                                                                                                                                                                                                                                                                                                                                                                                                                                                                                                                                                                                                                                                                                                                                                                                                                                                                                                                                                                                                                                                                                                                                             |   |            |             |             |   |            |             |             |   |            |             |             |   |            |             |             |   |            |             |             |   |            |             |             |   |            |             |            |   |            |             |            |   |            |            |             |   |            |             |             |   |            |             |             |   |             |             |             |   |             |             |             |   |             |            |             |   |             |             |             |   |             |             |             |   |             |            |             |   |             |             |             |   |             |             |             |   |             |             |             |   |             |             |             |   |             |             |             |   |             |             |             |   |             |            |             |   |             |             |             |   |             |             |            |   |             |             |             |   |             |            |             |   |            |            |            |   |            |            |            |   |            |            |            |
| H                                                                                                                                                                                                                                                                                                                                                                                                                                                                                                                                                                                                                                                                                                                                                                                                                                                                                                                                                                                                                                                                                                                                                                                                                                                                                                                                                                                                                                                                                                                                                                                                                                                                                                                                                                                                                                                                                                                                                                                                                                                                                                                                                                                                                                                                                                                                               | 1.13115400  | 1.26728600                                                                         | -1.25048300                                                                          |             |   |            |            |             |   |            |             |             |   |            |             |             |   |            |             |             |   |            |             |             |   |            |            |             |   |            |             |             |   |            |             |            |   |            |             |             |   |            |            |             |   |            |             |             |   |            |             |             |   |             |             |             |   |             |             |             |   |             |             |            |   |             |             |             |   |             |             |             |   |             |             |             |   |             |             |             |   |             |             |            |   |             |             |             |   |             |            |             |   |             |             |             |   |             |            |             |   |             |            |             |   |             |             |             |                                                                                                                                                                                                                                                                                                                                                                                                                                                                                                                                                                                                                                                                                                                                                                                                                                                                                                                                                                                                                                                                                                                                                                                                                                                                                                                                                                                                                                                                                                                                                                                                                                                                                                                                                                                                                                                                                                                                                                                                                                                                                                                                                                                                                                                                                                                                                                                                                                                                                                                     |            |             |            |                                                                                                                                                                                                                                                                                                                                                                                                                                                                                                                                                                                                                                                                                                                                                                                                                                                                                                                                                                                                                                                                                                                                                                                                                                                                                                                                                                                                                                                                                                                                                                                                                                                                                                                                                                                                                                                                                                                                                                                                                                                                                                                                                                                                                                                                                                                                                                                                                                                                                                                                                                                               |   |            |             |             |   |            |             |             |   |            |             |             |   |            |             |             |   |            |             |             |   |            |             |             |   |            |             |            |   |            |             |            |   |            |             |             |   |            |             |             |   |            |             |             |   |             |             |             |   |             |             |             |   |             |             |             |   |             |            |             |   |             |             |             |   |             |             |             |   |             |             |             |   |             |            |             |   |             |             |             |   |             |             |             |   |             |             |             |   |             |             |             |   |             |            |             |   |             |             |             |   |             |             |            |   |             |            |             |   |             |             |             |   |             |            |            |                                                                                                                                                                                                                                                                                                                                                                                                                                                                                                                                                                                                                                                                                                                                                                                                                                                                                                                                                                                                                                                                                                                                                                                                                                                                                                                                                                                                                                                                                                                                                                                                                                                                                                                                                                                                                                                                                                                                                                                                                                                                                                                                                                                                                                                                                                                                                                                                                                                                                                                        |            |            |            |             |            |            |            |                                                                                                                                                                                                                                                                                                                                                                                                                                                                                                                                                                                                                                                                                                                                                                                                                                                                                                                                                                                                                                                                                                                                                                                                                                                                                                                                                                                                                                                                                                                                                                                                                                                                                                                                                                                                                                                                                                                                                                                                                                                                                                                                                                                                                                                                                                                                                                                                                                                                                                                                                                                             |   |            |             |             |   |            |             |             |   |            |             |             |   |            |             |             |   |            |             |             |   |            |             |             |   |            |             |            |   |            |             |            |   |            |            |             |   |            |             |             |   |            |             |             |   |             |             |             |   |             |             |             |   |             |            |             |   |             |             |             |   |             |             |             |   |             |            |             |   |             |             |             |   |             |             |             |   |             |             |             |   |             |             |             |   |             |             |             |   |             |             |             |   |             |            |             |   |             |             |             |   |             |             |            |   |             |             |             |   |             |            |             |   |            |            |            |   |            |            |            |   |            |            |            |
| C                                                                                                                                                                                                                                                                                                                                                                                                                                                                                                                                                                                                                                                                                                                                                                                                                                                                                                                                                                                                                                                                                                                                                                                                                                                                                                                                                                                                                                                                                                                                                                                                                                                                                                                                                                                                                                                                                                                                                                                                                                                                                                                                                                                                                                                                                                                                               | 1.49993800  | 2.02144900                                                                         | 0.70584700                                                                           |             |   |            |            |             |   |            |             |             |   |            |             |             |   |            |             |             |   |            |             |             |   |            |            |             |   |            |             |             |   |            |             |            |   |            |             |             |   |            |            |             |   |            |             |             |   |            |             |             |   |             |             |             |   |             |             |             |   |             |             |            |   |             |             |             |   |             |             |             |   |             |             |             |   |             |             |             |   |             |             |            |   |             |             |             |   |             |            |             |   |             |             |             |   |             |            |             |   |             |            |             |   |             |             |             |                                                                                                                                                                                                                                                                                                                                                                                                                                                                                                                                                                                                                                                                                                                                                                                                                                                                                                                                                                                                                                                                                                                                                                                                                                                                                                                                                                                                                                                                                                                                                                                                                                                                                                                                                                                                                                                                                                                                                                                                                                                                                                                                                                                                                                                                                                                                                                                                                                                                                                                     |            |             |            |                                                                                                                                                                                                                                                                                                                                                                                                                                                                                                                                                                                                                                                                                                                                                                                                                                                                                                                                                                                                                                                                                                                                                                                                                                                                                                                                                                                                                                                                                                                                                                                                                                                                                                                                                                                                                                                                                                                                                                                                                                                                                                                                                                                                                                                                                                                                                                                                                                                                                                                                                                                               |   |            |             |             |   |            |             |             |   |            |             |             |   |            |             |             |   |            |             |             |   |            |             |             |   |            |             |            |   |            |             |            |   |            |             |             |   |            |             |             |   |            |             |             |   |             |             |             |   |             |             |             |   |             |             |             |   |             |            |             |   |             |             |             |   |             |             |             |   |             |             |             |   |             |            |             |   |             |             |             |   |             |             |             |   |             |             |             |   |             |             |             |   |             |            |             |   |             |             |             |   |             |             |            |   |             |            |             |   |             |             |             |   |             |            |            |                                                                                                                                                                                                                                                                                                                                                                                                                                                                                                                                                                                                                                                                                                                                                                                                                                                                                                                                                                                                                                                                                                                                                                                                                                                                                                                                                                                                                                                                                                                                                                                                                                                                                                                                                                                                                                                                                                                                                                                                                                                                                                                                                                                                                                                                                                                                                                                                                                                                                                                        |            |            |            |             |            |            |            |                                                                                                                                                                                                                                                                                                                                                                                                                                                                                                                                                                                                                                                                                                                                                                                                                                                                                                                                                                                                                                                                                                                                                                                                                                                                                                                                                                                                                                                                                                                                                                                                                                                                                                                                                                                                                                                                                                                                                                                                                                                                                                                                                                                                                                                                                                                                                                                                                                                                                                                                                                                             |   |            |             |             |   |            |             |             |   |            |             |             |   |            |             |             |   |            |             |             |   |            |             |             |   |            |             |            |   |            |             |            |   |            |            |             |   |            |             |             |   |            |             |             |   |             |             |             |   |             |             |             |   |             |            |             |   |             |             |             |   |             |             |             |   |             |            |             |   |             |             |             |   |             |             |             |   |             |             |             |   |             |             |             |   |             |             |             |   |             |             |             |   |             |            |             |   |             |             |             |   |             |             |            |   |             |             |             |   |             |            |             |   |            |            |            |   |            |            |            |   |            |            |            |
| O                                                                                                                                                                                                                                                                                                                                                                                                                                                                                                                                                                                                                                                                                                                                                                                                                                                                                                                                                                                                                                                                                                                                                                                                                                                                                                                                                                                                                                                                                                                                                                                                                                                                                                                                                                                                                                                                                                                                                                                                                                                                                                                                                                                                                                                                                                                                               | 1.15317300  | 1.94548900                                                                         | 1.90526600                                                                           |             |   |            |            |             |   |            |             |             |   |            |             |             |   |            |             |             |   |            |             |             |   |            |            |             |   |            |             |             |   |            |             |            |   |            |             |             |   |            |            |             |   |            |             |             |   |            |             |             |   |             |             |             |   |             |             |             |   |             |             |            |   |             |             |             |   |             |             |             |   |             |             |             |   |             |             |             |   |             |             |            |   |             |             |             |   |             |            |             |   |             |             |             |   |             |            |             |   |             |            |             |   |             |             |             |                                                                                                                                                                                                                                                                                                                                                                                                                                                                                                                                                                                                                                                                                                                                                                                                                                                                                                                                                                                                                                                                                                                                                                                                                                                                                                                                                                                                                                                                                                                                                                                                                                                                                                                                                                                                                                                                                                                                                                                                                                                                                                                                                                                                                                                                                                                                                                                                                                                                                                                     |            |             |            |                                                                                                                                                                                                                                                                                                                                                                                                                                                                                                                                                                                                                                                                                                                                                                                                                                                                                                                                                                                                                                                                                                                                                                                                                                                                                                                                                                                                                                                                                                                                                                                                                                                                                                                                                                                                                                                                                                                                                                                                                                                                                                                                                                                                                                                                                                                                                                                                                                                                                                                                                                                               |   |            |             |             |   |            |             |             |   |            |             |             |   |            |             |             |   |            |             |             |   |            |             |             |   |            |             |            |   |            |             |            |   |            |             |             |   |            |             |             |   |            |             |             |   |             |             |             |   |             |             |             |   |             |             |             |   |             |            |             |   |             |             |             |   |             |             |             |   |             |             |             |   |             |            |             |   |             |             |             |   |             |             |             |   |             |             |             |   |             |             |             |   |             |            |             |   |             |             |             |   |             |             |            |   |             |            |             |   |             |             |             |   |             |            |            |                                                                                                                                                                                                                                                                                                                                                                                                                                                                                                                                                                                                                                                                                                                                                                                                                                                                                                                                                                                                                                                                                                                                                                                                                                                                                                                                                                                                                                                                                                                                                                                                                                                                                                                                                                                                                                                                                                                                                                                                                                                                                                                                                                                                                                                                                                                                                                                                                                                                                                                        |            |            |            |             |            |            |            |                                                                                                                                                                                                                                                                                                                                                                                                                                                                                                                                                                                                                                                                                                                                                                                                                                                                                                                                                                                                                                                                                                                                                                                                                                                                                                                                                                                                                                                                                                                                                                                                                                                                                                                                                                                                                                                                                                                                                                                                                                                                                                                                                                                                                                                                                                                                                                                                                                                                                                                                                                                             |   |            |             |             |   |            |             |             |   |            |             |             |   |            |             |             |   |            |             |             |   |            |             |             |   |            |             |            |   |            |             |            |   |            |            |             |   |            |             |             |   |            |             |             |   |             |             |             |   |             |             |             |   |             |            |             |   |             |             |             |   |             |             |             |   |             |            |             |   |             |             |             |   |             |             |             |   |             |             |             |   |             |             |             |   |             |             |             |   |             |             |             |   |             |            |             |   |             |             |             |   |             |             |            |   |             |             |             |   |             |            |             |   |            |            |            |   |            |            |            |   |            |            |            |
| O                                                                                                                                                                                                                                                                                                                                                                                                                                                                                                                                                                                                                                                                                                                                                                                                                                                                                                                                                                                                                                                                                                                                                                                                                                                                                                                                                                                                                                                                                                                                                                                                                                                                                                                                                                                                                                                                                                                                                                                                                                                                                                                                                                                                                                                                                                                                               | 2.14940100  | 2.96188400                                                                         | 0.18709100                                                                           |             |   |            |            |             |   |            |             |             |   |            |             |             |   |            |             |             |   |            |             |             |   |            |            |             |   |            |             |             |   |            |             |            |   |            |             |             |   |            |            |             |   |            |             |             |   |            |             |             |   |             |             |             |   |             |             |             |   |             |             |            |   |             |             |             |   |             |             |             |   |             |             |             |   |             |             |             |   |             |             |            |   |             |             |             |   |             |            |             |   |             |             |             |   |             |            |             |   |             |            |             |   |             |             |             |                                                                                                                                                                                                                                                                                                                                                                                                                                                                                                                                                                                                                                                                                                                                                                                                                                                                                                                                                                                                                                                                                                                                                                                                                                                                                                                                                                                                                                                                                                                                                                                                                                                                                                                                                                                                                                                                                                                                                                                                                                                                                                                                                                                                                                                                                                                                                                                                                                                                                                                     |            |             |            |                                                                                                                                                                                                                                                                                                                                                                                                                                                                                                                                                                                                                                                                                                                                                                                                                                                                                                                                                                                                                                                                                                                                                                                                                                                                                                                                                                                                                                                                                                                                                                                                                                                                                                                                                                                                                                                                                                                                                                                                                                                                                                                                                                                                                                                                                                                                                                                                                                                                                                                                                                                               |   |            |             |             |   |            |             |             |   |            |             |             |   |            |             |             |   |            |             |             |   |            |             |             |   |            |             |            |   |            |             |            |   |            |             |             |   |            |             |             |   |            |             |             |   |             |             |             |   |             |             |             |   |             |             |             |   |             |            |             |   |             |             |             |   |             |             |             |   |             |             |             |   |             |            |             |   |             |             |             |   |             |             |             |   |             |             |             |   |             |             |             |   |             |            |             |   |             |             |             |   |             |             |            |   |             |            |             |   |             |             |             |   |             |            |            |                                                                                                                                                                                                                                                                                                                                                                                                                                                                                                                                                                                                                                                                                                                                                                                                                                                                                                                                                                                                                                                                                                                                                                                                                                                                                                                                                                                                                                                                                                                                                                                                                                                                                                                                                                                                                                                                                                                                                                                                                                                                                                                                                                                                                                                                                                                                                                                                                                                                                                                        |            |            |            |             |            |            |            |                                                                                                                                                                                                                                                                                                                                                                                                                                                                                                                                                                                                                                                                                                                                                                                                                                                                                                                                                                                                                                                                                                                                                                                                                                                                                                                                                                                                                                                                                                                                                                                                                                                                                                                                                                                                                                                                                                                                                                                                                                                                                                                                                                                                                                                                                                                                                                                                                                                                                                                                                                                             |   |            |             |             |   |            |             |             |   |            |             |             |   |            |             |             |   |            |             |             |   |            |             |             |   |            |             |            |   |            |             |            |   |            |            |             |   |            |             |             |   |            |             |             |   |             |             |             |   |             |             |             |   |             |            |             |   |             |             |             |   |             |             |             |   |             |            |             |   |             |             |             |   |             |             |             |   |             |             |             |   |             |             |             |   |             |             |             |   |             |             |             |   |             |            |             |   |             |             |             |   |             |             |            |   |             |             |             |   |             |            |             |   |            |            |            |   |            |            |            |   |            |            |            |
| C                                                                                                                                                                                                                                                                                                                                                                                                                                                                                                                                                                                                                                                                                                                                                                                                                                                                                                                                                                                                                                                                                                                                                                                                                                                                                                                                                                                                                                                                                                                                                                                                                                                                                                                                                                                                                                                                                                                                                                                                                                                                                                                                                                                                                                                                                                                                               | 3.53528600  | -2.15220800                                                                        | 0.63773000                                                                           |             |   |            |            |             |   |            |             |             |   |            |             |             |   |            |             |             |   |            |             |             |   |            |            |             |   |            |             |             |   |            |             |            |   |            |             |             |   |            |            |             |   |            |             |             |   |            |             |             |   |             |             |             |   |             |             |             |   |             |             |            |   |             |             |             |   |             |             |             |   |             |             |             |   |             |             |             |   |             |             |            |   |             |             |             |   |             |            |             |   |             |             |             |   |             |            |             |   |             |            |             |   |             |             |             |                                                                                                                                                                                                                                                                                                                                                                                                                                                                                                                                                                                                                                                                                                                                                                                                                                                                                                                                                                                                                                                                                                                                                                                                                                                                                                                                                                                                                                                                                                                                                                                                                                                                                                                                                                                                                                                                                                                                                                                                                                                                                                                                                                                                                                                                                                                                                                                                                                                                                                                     |            |             |            |                                                                                                                                                                                                                                                                                                                                                                                                                                                                                                                                                                                                                                                                                                                                                                                                                                                                                                                                                                                                                                                                                                                                                                                                                                                                                                                                                                                                                                                                                                                                                                                                                                                                                                                                                                                                                                                                                                                                                                                                                                                                                                                                                                                                                                                                                                                                                                                                                                                                                                                                                                                               |   |            |             |             |   |            |             |             |   |            |             |             |   |            |             |             |   |            |             |             |   |            |             |             |   |            |             |            |   |            |             |            |   |            |             |             |   |            |             |             |   |            |             |             |   |             |             |             |   |             |             |             |   |             |             |             |   |             |            |             |   |             |             |             |   |             |             |             |   |             |             |             |   |             |            |             |   |             |             |             |   |             |             |             |   |             |             |             |   |             |             |             |   |             |            |             |   |             |             |             |   |             |             |            |   |             |            |             |   |             |             |             |   |             |            |            |                                                                                                                                                                                                                                                                                                                                                                                                                                                                                                                                                                                                                                                                                                                                                                                                                                                                                                                                                                                                                                                                                                                                                                                                                                                                                                                                                                                                                                                                                                                                                                                                                                                                                                                                                                                                                                                                                                                                                                                                                                                                                                                                                                                                                                                                                                                                                                                                                                                                                                                        |            |            |            |             |            |            |            |                                                                                                                                                                                                                                                                                                                                                                                                                                                                                                                                                                                                                                                                                                                                                                                                                                                                                                                                                                                                                                                                                                                                                                                                                                                                                                                                                                                                                                                                                                                                                                                                                                                                                                                                                                                                                                                                                                                                                                                                                                                                                                                                                                                                                                                                                                                                                                                                                                                                                                                                                                                             |   |            |             |             |   |            |             |             |   |            |             |             |   |            |             |             |   |            |             |             |   |            |             |             |   |            |             |            |   |            |             |            |   |            |            |             |   |            |             |             |   |            |             |             |   |             |             |             |   |             |             |             |   |             |            |             |   |             |             |             |   |             |             |             |   |             |            |             |   |             |             |             |   |             |             |             |   |             |             |             |   |             |             |             |   |             |             |             |   |             |             |             |   |             |            |             |   |             |             |             |   |             |             |            |   |             |             |             |   |             |            |             |   |            |            |            |   |            |            |            |   |            |            |            |
| C                                                                                                                                                                                                                                                                                                                                                                                                                                                                                                                                                                                                                                                                                                                                                                                                                                                                                                                                                                                                                                                                                                                                                                                                                                                                                                                                                                                                                                                                                                                                                                                                                                                                                                                                                                                                                                                                                                                                                                                                                                                                                                                                                                                                                                                                                                                                               | 2.33205500  | -1.53260400                                                                        | 0.35933700                                                                           |             |   |            |            |             |   |            |             |             |   |            |             |             |   |            |             |             |   |            |             |             |   |            |            |             |   |            |             |             |   |            |             |            |   |            |             |             |   |            |            |             |   |            |             |             |   |            |             |             |   |             |             |             |   |             |             |             |   |             |             |            |   |             |             |             |   |             |             |             |   |             |             |             |   |             |             |             |   |             |             |            |   |             |             |             |   |             |            |             |   |             |             |             |   |             |            |             |   |             |            |             |   |             |             |             |                                                                                                                                                                                                                                                                                                                                                                                                                                                                                                                                                                                                                                                                                                                                                                                                                                                                                                                                                                                                                                                                                                                                                                                                                                                                                                                                                                                                                                                                                                                                                                                                                                                                                                                                                                                                                                                                                                                                                                                                                                                                                                                                                                                                                                                                                                                                                                                                                                                                                                                     |            |             |            |                                                                                                                                                                                                                                                                                                                                                                                                                                                                                                                                                                                                                                                                                                                                                                                                                                                                                                                                                                                                                                                                                                                                                                                                                                                                                                                                                                                                                                                                                                                                                                                                                                                                                                                                                                                                                                                                                                                                                                                                                                                                                                                                                                                                                                                                                                                                                                                                                                                                                                                                                                                               |   |            |             |             |   |            |             |             |   |            |             |             |   |            |             |             |   |            |             |             |   |            |             |             |   |            |             |            |   |            |             |            |   |            |             |             |   |            |             |             |   |            |             |             |   |             |             |             |   |             |             |             |   |             |             |             |   |             |            |             |   |             |             |             |   |             |             |             |   |             |             |             |   |             |            |             |   |             |             |             |   |             |             |             |   |             |             |             |   |             |             |             |   |             |            |             |   |             |             |             |   |             |             |            |   |             |            |             |   |             |             |             |   |             |            |            |                                                                                                                                                                                                                                                                                                                                                                                                                                                                                                                                                                                                                                                                                                                                                                                                                                                                                                                                                                                                                                                                                                                                                                                                                                                                                                                                                                                                                                                                                                                                                                                                                                                                                                                                                                                                                                                                                                                                                                                                                                                                                                                                                                                                                                                                                                                                                                                                                                                                                                                        |            |            |            |             |            |            |            |                                                                                                                                                                                                                                                                                                                                                                                                                                                                                                                                                                                                                                                                                                                                                                                                                                                                                                                                                                                                                                                                                                                                                                                                                                                                                                                                                                                                                                                                                                                                                                                                                                                                                                                                                                                                                                                                                                                                                                                                                                                                                                                                                                                                                                                                                                                                                                                                                                                                                                                                                                                             |   |            |             |             |   |            |             |             |   |            |             |             |   |            |             |             |   |            |             |             |   |            |             |             |   |            |             |            |   |            |             |            |   |            |            |             |   |            |             |             |   |            |             |             |   |             |             |             |   |             |             |             |   |             |            |             |   |             |             |             |   |             |             |             |   |             |            |             |   |             |             |             |   |             |             |             |   |             |             |             |   |             |             |             |   |             |             |             |   |             |             |             |   |             |            |             |   |             |             |             |   |             |             |            |   |             |             |             |   |             |            |             |   |            |            |            |   |            |            |            |   |            |            |            |
| C                                                                                                                                                                                                                                                                                                                                                                                                                                                                                                                                                                                                                                                                                                                                                                                                                                                                                                                                                                                                                                                                                                                                                                                                                                                                                                                                                                                                                                                                                                                                                                                                                                                                                                                                                                                                                                                                                                                                                                                                                                                                                                                                                                                                                                                                                                                                               | 2.24806000  | -0.36005100                                                                        | -0.46700800                                                                          |             |   |            |            |             |   |            |             |             |   |            |             |             |   |            |             |             |   |            |             |             |   |            |            |             |   |            |             |             |   |            |             |            |   |            |             |             |   |            |            |             |   |            |             |             |   |            |             |             |   |             |             |             |   |             |             |             |   |             |             |            |   |             |             |             |   |             |             |             |   |             |             |             |   |             |             |             |   |             |             |            |   |             |             |             |   |             |            |             |   |             |             |             |   |             |            |             |   |             |            |             |   |             |             |             |                                                                                                                                                                                                                                                                                                                                                                                                                                                                                                                                                                                                                                                                                                                                                                                                                                                                                                                                                                                                                                                                                                                                                                                                                                                                                                                                                                                                                                                                                                                                                                                                                                                                                                                                                                                                                                                                                                                                                                                                                                                                                                                                                                                                                                                                                                                                                                                                                                                                                                                     |            |             |            |                                                                                                                                                                                                                                                                                                                                                                                                                                                                                                                                                                                                                                                                                                                                                                                                                                                                                                                                                                                                                                                                                                                                                                                                                                                                                                                                                                                                                                                                                                                                                                                                                                                                                                                                                                                                                                                                                                                                                                                                                                                                                                                                                                                                                                                                                                                                                                                                                                                                                                                                                                                               |   |            |             |             |   |            |             |             |   |            |             |             |   |            |             |             |   |            |             |             |   |            |             |             |   |            |             |            |   |            |             |            |   |            |             |             |   |            |             |             |   |            |             |             |   |             |             |             |   |             |             |             |   |             |             |             |   |             |            |             |   |             |             |             |   |             |             |             |   |             |             |             |   |             |            |             |   |             |             |             |   |             |             |             |   |             |             |             |   |             |             |             |   |             |            |             |   |             |             |             |   |             |             |            |   |             |            |             |   |             |             |             |   |             |            |            |                                                                                                                                                                                                                                                                                                                                                                                                                                                                                                                                                                                                                                                                                                                                                                                                                                                                                                                                                                                                                                                                                                                                                                                                                                                                                                                                                                                                                                                                                                                                                                                                                                                                                                                                                                                                                                                                                                                                                                                                                                                                                                                                                                                                                                                                                                                                                                                                                                                                                                                        |            |            |            |             |            |            |            |                                                                                                                                                                                                                                                                                                                                                                                                                                                                                                                                                                                                                                                                                                                                                                                                                                                                                                                                                                                                                                                                                                                                                                                                                                                                                                                                                                                                                                                                                                                                                                                                                                                                                                                                                                                                                                                                                                                                                                                                                                                                                                                                                                                                                                                                                                                                                                                                                                                                                                                                                                                             |   |            |             |             |   |            |             |             |   |            |             |             |   |            |             |             |   |            |             |             |   |            |             |             |   |            |             |            |   |            |             |            |   |            |            |             |   |            |             |             |   |            |             |             |   |             |             |             |   |             |             |             |   |             |            |             |   |             |             |             |   |             |             |             |   |             |            |             |   |             |             |             |   |             |             |             |   |             |             |             |   |             |             |             |   |             |             |             |   |             |             |             |   |             |            |             |   |             |             |             |   |             |             |            |   |             |             |             |   |             |            |             |   |            |            |            |   |            |            |            |   |            |            |            |
| C                                                                                                                                                                                                                                                                                                                                                                                                                                                                                                                                                                                                                                                                                                                                                                                                                                                                                                                                                                                                                                                                                                                                                                                                                                                                                                                                                                                                                                                                                                                                                                                                                                                                                                                                                                                                                                                                                                                                                                                                                                                                                                                                                                                                                                                                                                                                               | 3.51333600  | 0.08547500                                                                         | -0.98260300                                                                          |             |   |            |            |             |   |            |             |             |   |            |             |             |   |            |             |             |   |            |             |             |   |            |            |             |   |            |             |             |   |            |             |            |   |            |             |             |   |            |            |             |   |            |             |             |   |            |             |             |   |             |             |             |   |             |             |             |   |             |             |            |   |             |             |             |   |             |             |             |   |             |             |             |   |             |             |             |   |             |             |            |   |             |             |             |   |             |            |             |   |             |             |             |   |             |            |             |   |             |            |             |   |             |             |             |                                                                                                                                                                                                                                                                                                                                                                                                                                                                                                                                                                                                                                                                                                                                                                                                                                                                                                                                                                                                                                                                                                                                                                                                                                                                                                                                                                                                                                                                                                                                                                                                                                                                                                                                                                                                                                                                                                                                                                                                                                                                                                                                                                                                                                                                                                                                                                                                                                                                                                                     |            |             |            |                                                                                                                                                                                                                                                                                                                                                                                                                                                                                                                                                                                                                                                                                                                                                                                                                                                                                                                                                                                                                                                                                                                                                                                                                                                                                                                                                                                                                                                                                                                                                                                                                                                                                                                                                                                                                                                                                                                                                                                                                                                                                                                                                                                                                                                                                                                                                                                                                                                                                                                                                                                               |   |            |             |             |   |            |             |             |   |            |             |             |   |            |             |             |   |            |             |             |   |            |             |             |   |            |             |            |   |            |             |            |   |            |             |             |   |            |             |             |   |            |             |             |   |             |             |             |   |             |             |             |   |             |             |             |   |             |            |             |   |             |             |             |   |             |             |             |   |             |             |             |   |             |            |             |   |             |             |             |   |             |             |             |   |             |             |             |   |             |             |             |   |             |            |             |   |             |             |             |   |             |             |            |   |             |            |             |   |             |             |             |   |             |            |            |                                                                                                                                                                                                                                                                                                                                                                                                                                                                                                                                                                                                                                                                                                                                                                                                                                                                                                                                                                                                                                                                                                                                                                                                                                                                                                                                                                                                                                                                                                                                                                                                                                                                                                                                                                                                                                                                                                                                                                                                                                                                                                                                                                                                                                                                                                                                                                                                                                                                                                                        |            |            |            |             |            |            |            |                                                                                                                                                                                                                                                                                                                                                                                                                                                                                                                                                                                                                                                                                                                                                                                                                                                                                                                                                                                                                                                                                                                                                                                                                                                                                                                                                                                                                                                                                                                                                                                                                                                                                                                                                                                                                                                                                                                                                                                                                                                                                                                                                                                                                                                                                                                                                                                                                                                                                                                                                                                             |   |            |             |             |   |            |             |             |   |            |             |             |   |            |             |             |   |            |             |             |   |            |             |             |   |            |             |            |   |            |             |            |   |            |            |             |   |            |             |             |   |            |             |             |   |             |             |             |   |             |             |             |   |             |            |             |   |             |             |             |   |             |             |             |   |             |            |             |   |             |             |             |   |             |             |             |   |             |             |             |   |             |             |             |   |             |             |             |   |             |             |             |   |             |            |             |   |             |             |             |   |             |             |            |   |             |             |             |   |             |            |             |   |            |            |            |   |            |            |            |   |            |            |            |
| C                                                                                                                                                                                                                                                                                                                                                                                                                                                                                                                                                                                                                                                                                                                                                                                                                                                                                                                                                                                                                                                                                                                                                                                                                                                                                                                                                                                                                                                                                                                                                                                                                                                                                                                                                                                                                                                                                                                                                                                                                                                                                                                                                                                                                                                                                                                                               | 4.69977400  | -0.54513200                                                                        | -0.69020400                                                                          |             |   |            |            |             |   |            |             |             |   |            |             |             |   |            |             |             |   |            |             |             |   |            |            |             |   |            |             |             |   |            |             |            |   |            |             |             |   |            |            |             |   |            |             |             |   |            |             |             |   |             |             |             |   |             |             |             |   |             |             |            |   |             |             |             |   |             |             |             |   |             |             |             |   |             |             |             |   |             |             |            |   |             |             |             |   |             |            |             |   |             |             |             |   |             |            |             |   |             |            |             |   |             |             |             |                                                                                                                                                                                                                                                                                                                                                                                                                                                                                                                                                                                                                                                                                                                                                                                                                                                                                                                                                                                                                                                                                                                                                                                                                                                                                                                                                                                                                                                                                                                                                                                                                                                                                                                                                                                                                                                                                                                                                                                                                                                                                                                                                                                                                                                                                                                                                                                                                                                                                                                     |            |             |            |                                                                                                                                                                                                                                                                                                                                                                                                                                                                                                                                                                                                                                                                                                                                                                                                                                                                                                                                                                                                                                                                                                                                                                                                                                                                                                                                                                                                                                                                                                                                                                                                                                                                                                                                                                                                                                                                                                                                                                                                                                                                                                                                                                                                                                                                                                                                                                                                                                                                                                                                                                                               |   |            |             |             |   |            |             |             |   |            |             |             |   |            |             |             |   |            |             |             |   |            |             |             |   |            |             |            |   |            |             |            |   |            |             |             |   |            |             |             |   |            |             |             |   |             |             |             |   |             |             |             |   |             |             |             |   |             |            |             |   |             |             |             |   |             |             |             |   |             |             |             |   |             |            |             |   |             |             |             |   |             |             |             |   |             |             |             |   |             |             |             |   |             |            |             |   |             |             |             |   |             |             |            |   |             |            |             |   |             |             |             |   |             |            |            |                                                                                                                                                                                                                                                                                                                                                                                                                                                                                                                                                                                                                                                                                                                                                                                                                                                                                                                                                                                                                                                                                                                                                                                                                                                                                                                                                                                                                                                                                                                                                                                                                                                                                                                                                                                                                                                                                                                                                                                                                                                                                                                                                                                                                                                                                                                                                                                                                                                                                                                        |            |            |            |             |            |            |            |                                                                                                                                                                                                                                                                                                                                                                                                                                                                                                                                                                                                                                                                                                                                                                                                                                                                                                                                                                                                                                                                                                                                                                                                                                                                                                                                                                                                                                                                                                                                                                                                                                                                                                                                                                                                                                                                                                                                                                                                                                                                                                                                                                                                                                                                                                                                                                                                                                                                                                                                                                                             |   |            |             |             |   |            |             |             |   |            |             |             |   |            |             |             |   |            |             |             |   |            |             |             |   |            |             |            |   |            |             |            |   |            |            |             |   |            |             |             |   |            |             |             |   |             |             |             |   |             |             |             |   |             |            |             |   |             |             |             |   |             |             |             |   |             |            |             |   |             |             |             |   |             |             |             |   |             |             |             |   |             |             |             |   |             |             |             |   |             |             |             |   |             |            |             |   |             |             |             |   |             |             |            |   |             |             |             |   |             |            |             |   |            |            |            |   |            |            |            |   |            |            |            |
| C                                                                                                                                                                                                                                                                                                                                                                                                                                                                                                                                                                                                                                                                                                                                                                                                                                                                                                                                                                                                                                                                                                                                                                                                                                                                                                                                                                                                                                                                                                                                                                                                                                                                                                                                                                                                                                                                                                                                                                                                                                                                                                                                                                                                                                                                                                                                               | 4.74730300  | -1.68144400                                                                        | 0.13099000                                                                           |             |   |            |            |             |   |            |             |             |   |            |             |             |   |            |             |             |   |            |             |             |   |            |            |             |   |            |             |             |   |            |             |            |   |            |             |             |   |            |            |             |   |            |             |             |   |            |             |             |   |             |             |             |   |             |             |             |   |             |             |            |   |             |             |             |   |             |             |             |   |             |             |             |   |             |             |             |   |             |             |            |   |             |             |             |   |             |            |             |   |             |             |             |   |             |            |             |   |             |            |             |   |             |             |             |                                                                                                                                                                                                                                                                                                                                                                                                                                                                                                                                                                                                                                                                                                                                                                                                                                                                                                                                                                                                                                                                                                                                                                                                                                                                                                                                                                                                                                                                                                                                                                                                                                                                                                                                                                                                                                                                                                                                                                                                                                                                                                                                                                                                                                                                                                                                                                                                                                                                                                                     |            |             |            |                                                                                                                                                                                                                                                                                                                                                                                                                                                                                                                                                                                                                                                                                                                                                                                                                                                                                                                                                                                                                                                                                                                                                                                                                                                                                                                                                                                                                                                                                                                                                                                                                                                                                                                                                                                                                                                                                                                                                                                                                                                                                                                                                                                                                                                                                                                                                                                                                                                                                                                                                                                               |   |            |             |             |   |            |             |             |   |            |             |             |   |            |             |             |   |            |             |             |   |            |             |             |   |            |             |            |   |            |             |            |   |            |             |             |   |            |             |             |   |            |             |             |   |             |             |             |   |             |             |             |   |             |             |             |   |             |            |             |   |             |             |             |   |             |             |             |   |             |             |             |   |             |            |             |   |             |             |             |   |             |             |             |   |             |             |             |   |             |             |             |   |             |            |             |   |             |             |             |   |             |             |            |   |             |            |             |   |             |             |             |   |             |            |            |                                                                                                                                                                                                                                                                                                                                                                                                                                                                                                                                                                                                                                                                                                                                                                                                                                                                                                                                                                                                                                                                                                                                                                                                                                                                                                                                                                                                                                                                                                                                                                                                                                                                                                                                                                                                                                                                                                                                                                                                                                                                                                                                                                                                                                                                                                                                                                                                                                                                                                                        |            |            |            |             |            |            |            |                                                                                                                                                                                                                                                                                                                                                                                                                                                                                                                                                                                                                                                                                                                                                                                                                                                                                                                                                                                                                                                                                                                                                                                                                                                                                                                                                                                                                                                                                                                                                                                                                                                                                                                                                                                                                                                                                                                                                                                                                                                                                                                                                                                                                                                                                                                                                                                                                                                                                                                                                                                             |   |            |             |             |   |            |             |             |   |            |             |             |   |            |             |             |   |            |             |             |   |            |             |             |   |            |             |            |   |            |             |            |   |            |            |             |   |            |             |             |   |            |             |             |   |             |             |             |   |             |             |             |   |             |            |             |   |             |             |             |   |             |             |             |   |             |            |             |   |             |             |             |   |             |             |             |   |             |             |             |   |             |             |             |   |             |             |             |   |             |             |             |   |             |            |             |   |             |             |             |   |             |             |            |   |             |             |             |   |             |            |             |   |            |            |            |   |            |            |            |   |            |            |            |
| H                                                                                                                                                                                                                                                                                                                                                                                                                                                                                                                                                                                                                                                                                                                                                                                                                                                                                                                                                                                                                                                                                                                                                                                                                                                                                                                                                                                                                                                                                                                                                                                                                                                                                                                                                                                                                                                                                                                                                                                                                                                                                                                                                                                                                                                                                                                                               | 3.53081300  | -3.03335900                                                                        | 1.27367600                                                                           |             |   |            |            |             |   |            |             |             |   |            |             |             |   |            |             |             |   |            |             |             |   |            |            |             |   |            |             |             |   |            |             |            |   |            |             |             |   |            |            |             |   |            |             |             |   |            |             |             |   |             |             |             |   |             |             |             |   |             |             |            |   |             |             |             |   |             |             |             |   |             |             |             |   |             |             |             |   |             |             |            |   |             |             |             |   |             |            |             |   |             |             |             |   |             |            |             |   |             |            |             |   |             |             |             |                                                                                                                                                                                                                                                                                                                                                                                                                                                                                                                                                                                                                                                                                                                                                                                                                                                                                                                                                                                                                                                                                                                                                                                                                                                                                                                                                                                                                                                                                                                                                                                                                                                                                                                                                                                                                                                                                                                                                                                                                                                                                                                                                                                                                                                                                                                                                                                                                                                                                                                     |            |             |            |                                                                                                                                                                                                                                                                                                                                                                                                                                                                                                                                                                                                                                                                                                                                                                                                                                                                                                                                                                                                                                                                                                                                                                                                                                                                                                                                                                                                                                                                                                                                                                                                                                                                                                                                                                                                                                                                                                                                                                                                                                                                                                                                                                                                                                                                                                                                                                                                                                                                                                                                                                                               |   |            |             |             |   |            |             |             |   |            |             |             |   |            |             |             |   |            |             |             |   |            |             |             |   |            |             |            |   |            |             |            |   |            |             |             |   |            |             |             |   |            |             |             |   |             |             |             |   |             |             |             |   |             |             |             |   |             |            |             |   |             |             |             |   |             |             |             |   |             |             |             |   |             |            |             |   |             |             |             |   |             |             |             |   |             |             |             |   |             |             |             |   |             |            |             |   |             |             |             |   |             |             |            |   |             |            |             |   |             |             |             |   |             |            |            |                                                                                                                                                                                                                                                                                                                                                                                                                                                                                                                                                                                                                                                                                                                                                                                                                                                                                                                                                                                                                                                                                                                                                                                                                                                                                                                                                                                                                                                                                                                                                                                                                                                                                                                                                                                                                                                                                                                                                                                                                                                                                                                                                                                                                                                                                                                                                                                                                                                                                                                        |            |            |            |             |            |            |            |                                                                                                                                                                                                                                                                                                                                                                                                                                                                                                                                                                                                                                                                                                                                                                                                                                                                                                                                                                                                                                                                                                                                                                                                                                                                                                                                                                                                                                                                                                                                                                                                                                                                                                                                                                                                                                                                                                                                                                                                                                                                                                                                                                                                                                                                                                                                                                                                                                                                                                                                                                                             |   |            |             |             |   |            |             |             |   |            |             |             |   |            |             |             |   |            |             |             |   |            |             |             |   |            |             |            |   |            |             |            |   |            |            |             |   |            |             |             |   |            |             |             |   |             |             |             |   |             |             |             |   |             |            |             |   |             |             |             |   |             |             |             |   |             |            |             |   |             |             |             |   |             |             |             |   |             |             |             |   |             |             |             |   |             |             |             |   |             |             |             |   |             |            |             |   |             |             |             |   |             |             |            |   |             |             |             |   |             |            |             |   |            |            |            |   |            |            |            |   |            |            |            |
| H                                                                                                                                                                                                                                                                                                                                                                                                                                                                                                                                                                                                                                                                                                                                                                                                                                                                                                                                                                                                                                                                                                                                                                                                                                                                                                                                                                                                                                                                                                                                                                                                                                                                                                                                                                                                                                                                                                                                                                                                                                                                                                                                                                                                                                                                                                                                               | 1.42661300  | -1.93971100                                                                        | 0.79427000                                                                           |             |   |            |            |             |   |            |             |             |   |            |             |             |   |            |             |             |   |            |             |             |   |            |            |             |   |            |             |             |   |            |             |            |   |            |             |             |   |            |            |             |   |            |             |             |   |            |             |             |   |             |             |             |   |             |             |             |   |             |             |            |   |             |             |             |   |             |             |             |   |             |             |             |   |             |             |             |   |             |             |            |   |             |             |             |   |             |            |             |   |             |             |             |   |             |            |             |   |             |            |             |   |             |             |             |                                                                                                                                                                                                                                                                                                                                                                                                                                                                                                                                                                                                                                                                                                                                                                                                                                                                                                                                                                                                                                                                                                                                                                                                                                                                                                                                                                                                                                                                                                                                                                                                                                                                                                                                                                                                                                                                                                                                                                                                                                                                                                                                                                                                                                                                                                                                                                                                                                                                                                                     |            |             |            |                                                                                                                                                                                                                                                                                                                                                                                                                                                                                                                                                                                                                                                                                                                                                                                                                                                                                                                                                                                                                                                                                                                                                                                                                                                                                                                                                                                                                                                                                                                                                                                                                                                                                                                                                                                                                                                                                                                                                                                                                                                                                                                                                                                                                                                                                                                                                                                                                                                                                                                                                                                               |   |            |             |             |   |            |             |             |   |            |             |             |   |            |             |             |   |            |             |             |   |            |             |             |   |            |             |            |   |            |             |            |   |            |             |             |   |            |             |             |   |            |             |             |   |             |             |             |   |             |             |             |   |             |             |             |   |             |            |             |   |             |             |             |   |             |             |             |   |             |             |             |   |             |            |             |   |             |             |             |   |             |             |             |   |             |             |             |   |             |             |             |   |             |            |             |   |             |             |             |   |             |             |            |   |             |            |             |   |             |             |             |   |             |            |            |                                                                                                                                                                                                                                                                                                                                                                                                                                                                                                                                                                                                                                                                                                                                                                                                                                                                                                                                                                                                                                                                                                                                                                                                                                                                                                                                                                                                                                                                                                                                                                                                                                                                                                                                                                                                                                                                                                                                                                                                                                                                                                                                                                                                                                                                                                                                                                                                                                                                                                                        |            |            |            |             |            |            |            |                                                                                                                                                                                                                                                                                                                                                                                                                                                                                                                                                                                                                                                                                                                                                                                                                                                                                                                                                                                                                                                                                                                                                                                                                                                                                                                                                                                                                                                                                                                                                                                                                                                                                                                                                                                                                                                                                                                                                                                                                                                                                                                                                                                                                                                                                                                                                                                                                                                                                                                                                                                             |   |            |             |             |   |            |             |             |   |            |             |             |   |            |             |             |   |            |             |             |   |            |             |             |   |            |             |            |   |            |             |            |   |            |            |             |   |            |             |             |   |            |             |             |   |             |             |             |   |             |             |             |   |             |            |             |   |             |             |             |   |             |             |             |   |             |            |             |   |             |             |             |   |             |             |             |   |             |             |             |   |             |             |             |   |             |             |             |   |             |             |             |   |             |            |             |   |             |             |             |   |             |             |            |   |             |             |             |   |             |            |             |   |            |            |            |   |            |            |            |   |            |            |            |
| H                                                                                                                                                                                                                                                                                                                                                                                                                                                                                                                                                                                                                                                                                                                                                                                                                                                                                                                                                                                                                                                                                                                                                                                                                                                                                                                                                                                                                                                                                                                                                                                                                                                                                                                                                                                                                                                                                                                                                                                                                                                                                                                                                                                                                                                                                                                                               | 3.52133500  | 0.96108800                                                                         | -1.62461300                                                                          |             |   |            |            |             |   |            |             |             |   |            |             |             |   |            |             |             |   |            |             |             |   |            |            |             |   |            |             |             |   |            |             |            |   |            |             |             |   |            |            |             |   |            |             |             |   |            |             |             |   |             |             |             |   |             |             |             |   |             |             |            |   |             |             |             |   |             |             |             |   |             |             |             |   |             |             |             |   |             |             |            |   |             |             |             |   |             |            |             |   |             |             |             |   |             |            |             |   |             |            |             |   |             |             |             |                                                                                                                                                                                                                                                                                                                                                                                                                                                                                                                                                                                                                                                                                                                                                                                                                                                                                                                                                                                                                                                                                                                                                                                                                                                                                                                                                                                                                                                                                                                                                                                                                                                                                                                                                                                                                                                                                                                                                                                                                                                                                                                                                                                                                                                                                                                                                                                                                                                                                                                     |            |             |            |                                                                                                                                                                                                                                                                                                                                                                                                                                                                                                                                                                                                                                                                                                                                                                                                                                                                                                                                                                                                                                                                                                                                                                                                                                                                                                                                                                                                                                                                                                                                                                                                                                                                                                                                                                                                                                                                                                                                                                                                                                                                                                                                                                                                                                                                                                                                                                                                                                                                                                                                                                                               |   |            |             |             |   |            |             |             |   |            |             |             |   |            |             |             |   |            |             |             |   |            |             |             |   |            |             |            |   |            |             |            |   |            |             |             |   |            |             |             |   |            |             |             |   |             |             |             |   |             |             |             |   |             |             |             |   |             |            |             |   |             |             |             |   |             |             |             |   |             |             |             |   |             |            |             |   |             |             |             |   |             |             |             |   |             |             |             |   |             |             |             |   |             |            |             |   |             |             |             |   |             |             |            |   |             |            |             |   |             |             |             |   |             |            |            |                                                                                                                                                                                                                                                                                                                                                                                                                                                                                                                                                                                                                                                                                                                                                                                                                                                                                                                                                                                                                                                                                                                                                                                                                                                                                                                                                                                                                                                                                                                                                                                                                                                                                                                                                                                                                                                                                                                                                                                                                                                                                                                                                                                                                                                                                                                                                                                                                                                                                                                        |            |            |            |             |            |            |            |                                                                                                                                                                                                                                                                                                                                                                                                                                                                                                                                                                                                                                                                                                                                                                                                                                                                                                                                                                                                                                                                                                                                                                                                                                                                                                                                                                                                                                                                                                                                                                                                                                                                                                                                                                                                                                                                                                                                                                                                                                                                                                                                                                                                                                                                                                                                                                                                                                                                                                                                                                                             |   |            |             |             |   |            |             |             |   |            |             |             |   |            |             |             |   |            |             |             |   |            |             |             |   |            |             |            |   |            |             |            |   |            |            |             |   |            |             |             |   |            |             |             |   |             |             |             |   |             |             |             |   |             |            |             |   |             |             |             |   |             |             |             |   |             |            |             |   |             |             |             |   |             |             |             |   |             |             |             |   |             |             |             |   |             |             |             |   |             |             |             |   |             |            |             |   |             |             |             |   |             |             |            |   |             |             |             |   |             |            |             |   |            |            |            |   |            |            |            |   |            |            |            |
| H                                                                                                                                                                                                                                                                                                                                                                                                                                                                                                                                                                                                                                                                                                                                                                                                                                                                                                                                                                                                                                                                                                                                                                                                                                                                                                                                                                                                                                                                                                                                                                                                                                                                                                                                                                                                                                                                                                                                                                                                                                                                                                                                                                                                                                                                                                                                               | 5.62014400  | -0.15161500                                                                        | -1.11254800                                                                          |             |   |            |            |             |   |            |             |             |   |            |             |             |   |            |             |             |   |            |             |             |   |            |            |             |   |            |             |             |   |            |             |            |   |            |             |             |   |            |            |             |   |            |             |             |   |            |             |             |   |             |             |             |   |             |             |             |   |             |             |            |   |             |             |             |   |             |             |             |   |             |             |             |   |             |             |             |   |             |             |            |   |             |             |             |   |             |            |             |   |             |             |             |   |             |            |             |   |             |            |             |   |             |             |             |                                                                                                                                                                                                                                                                                                                                                                                                                                                                                                                                                                                                                                                                                                                                                                                                                                                                                                                                                                                                                                                                                                                                                                                                                                                                                                                                                                                                                                                                                                                                                                                                                                                                                                                                                                                                                                                                                                                                                                                                                                                                                                                                                                                                                                                                                                                                                                                                                                                                                                                     |            |             |            |                                                                                                                                                                                                                                                                                                                                                                                                                                                                                                                                                                                                                                                                                                                                                                                                                                                                                                                                                                                                                                                                                                                                                                                                                                                                                                                                                                                                                                                                                                                                                                                                                                                                                                                                                                                                                                                                                                                                                                                                                                                                                                                                                                                                                                                                                                                                                                                                                                                                                                                                                                                               |   |            |             |             |   |            |             |             |   |            |             |             |   |            |             |             |   |            |             |             |   |            |             |             |   |            |             |            |   |            |             |            |   |            |             |             |   |            |             |             |   |            |             |             |   |             |             |             |   |             |             |             |   |             |             |             |   |             |            |             |   |             |             |             |   |             |             |             |   |             |             |             |   |             |            |             |   |             |             |             |   |             |             |             |   |             |             |             |   |             |             |             |   |             |            |             |   |             |             |             |   |             |             |            |   |             |            |             |   |             |             |             |   |             |            |            |                                                                                                                                                                                                                                                                                                                                                                                                                                                                                                                                                                                                                                                                                                                                                                                                                                                                                                                                                                                                                                                                                                                                                                                                                                                                                                                                                                                                                                                                                                                                                                                                                                                                                                                                                                                                                                                                                                                                                                                                                                                                                                                                                                                                                                                                                                                                                                                                                                                                                                                        |            |            |            |             |            |            |            |                                                                                                                                                                                                                                                                                                                                                                                                                                                                                                                                                                                                                                                                                                                                                                                                                                                                                                                                                                                                                                                                                                                                                                                                                                                                                                                                                                                                                                                                                                                                                                                                                                                                                                                                                                                                                                                                                                                                                                                                                                                                                                                                                                                                                                                                                                                                                                                                                                                                                                                                                                                             |   |            |             |             |   |            |             |             |   |            |             |             |   |            |             |             |   |            |             |             |   |            |             |             |   |            |             |            |   |            |             |            |   |            |            |             |   |            |             |             |   |            |             |             |   |             |             |             |   |             |             |             |   |             |            |             |   |             |             |             |   |             |             |             |   |             |            |             |   |             |             |             |   |             |             |             |   |             |             |             |   |             |             |             |   |             |             |             |   |             |             |             |   |             |            |             |   |             |             |             |   |             |             |            |   |             |             |             |   |             |            |             |   |            |            |            |   |            |            |            |   |            |            |            |
| H                                                                                                                                                                                                                                                                                                                                                                                                                                                                                                                                                                                                                                                                                                                                                                                                                                                                                                                                                                                                                                                                                                                                                                                                                                                                                                                                                                                                                                                                                                                                                                                                                                                                                                                                                                                                                                                                                                                                                                                                                                                                                                                                                                                                                                                                                                                                               | 5.68333500  | -2.17760100                                                                        | 0.35350500                                                                           |             |   |            |            |             |   |            |             |             |   |            |             |             |   |            |             |             |   |            |             |             |   |            |            |             |   |            |             |             |   |            |             |            |   |            |             |             |   |            |            |             |   |            |             |             |   |            |             |             |   |             |             |             |   |             |             |             |   |             |             |            |   |             |             |             |   |             |             |             |   |             |             |             |   |             |             |             |   |             |             |            |   |             |             |             |   |             |            |             |   |             |             |             |   |             |            |             |   |             |            |             |   |             |             |             |                                                                                                                                                                                                                                                                                                                                                                                                                                                                                                                                                                                                                                                                                                                                                                                                                                                                                                                                                                                                                                                                                                                                                                                                                                                                                                                                                                                                                                                                                                                                                                                                                                                                                                                                                                                                                                                                                                                                                                                                                                                                                                                                                                                                                                                                                                                                                                                                                                                                                                                     |            |             |            |                                                                                                                                                                                                                                                                                                                                                                                                                                                                                                                                                                                                                                                                                                                                                                                                                                                                                                                                                                                                                                                                                                                                                                                                                                                                                                                                                                                                                                                                                                                                                                                                                                                                                                                                                                                                                                                                                                                                                                                                                                                                                                                                                                                                                                                                                                                                                                                                                                                                                                                                                                                               |   |            |             |             |   |            |             |             |   |            |             |             |   |            |             |             |   |            |             |             |   |            |             |             |   |            |             |            |   |            |             |            |   |            |             |             |   |            |             |             |   |            |             |             |   |             |             |             |   |             |             |             |   |             |             |             |   |             |            |             |   |             |             |             |   |             |             |             |   |             |             |             |   |             |            |             |   |             |             |             |   |             |             |             |   |             |             |             |   |             |             |             |   |             |            |             |   |             |             |             |   |             |             |            |   |             |            |             |   |             |             |             |   |             |            |            |                                                                                                                                                                                                                                                                                                                                                                                                                                                                                                                                                                                                                                                                                                                                                                                                                                                                                                                                                                                                                                                                                                                                                                                                                                                                                                                                                                                                                                                                                                                                                                                                                                                                                                                                                                                                                                                                                                                                                                                                                                                                                                                                                                                                                                                                                                                                                                                                                                                                                                                        |            |            |            |             |            |            |            |                                                                                                                                                                                                                                                                                                                                                                                                                                                                                                                                                                                                                                                                                                                                                                                                                                                                                                                                                                                                                                                                                                                                                                                                                                                                                                                                                                                                                                                                                                                                                                                                                                                                                                                                                                                                                                                                                                                                                                                                                                                                                                                                                                                                                                                                                                                                                                                                                                                                                                                                                                                             |   |            |             |             |   |            |             |             |   |            |             |             |   |            |             |             |   |            |             |             |   |            |             |             |   |            |             |            |   |            |             |            |   |            |            |             |   |            |             |             |   |            |             |             |   |             |             |             |   |             |             |             |   |             |            |             |   |             |             |             |   |             |             |             |   |             |            |             |   |             |             |             |   |             |             |             |   |             |             |             |   |             |             |             |   |             |             |             |   |             |             |             |   |             |            |             |   |             |             |             |   |             |             |            |   |             |             |             |   |             |            |             |   |            |            |            |   |            |            |            |   |            |            |            |
| C                                                                                                                                                                                                                                                                                                                                                                                                                                                                                                                                                                                                                                                                                                                                                                                                                                                                                                                                                                                                                                                                                                                                                                                                                                                                                                                                                                                                                                                                                                                                                                                                                                                                                                                                                                                                                                                                                                                                                                                                                                                                                                                                                                                                                                                                                                                                               | -0.27067900 | -0.14706500                                                                        | -0.44940300                                                                          |             |   |            |            |             |   |            |             |             |   |            |             |             |   |            |             |             |   |            |             |             |   |            |            |             |   |            |             |             |   |            |             |            |   |            |             |             |   |            |            |             |   |            |             |             |   |            |             |             |   |             |             |             |   |             |             |             |   |             |             |            |   |             |             |             |   |             |             |             |   |             |             |             |   |             |             |             |   |             |             |            |   |             |             |             |   |             |            |             |   |             |             |             |   |             |            |             |   |             |            |             |   |             |             |             |                                                                                                                                                                                                                                                                                                                                                                                                                                                                                                                                                                                                                                                                                                                                                                                                                                                                                                                                                                                                                                                                                                                                                                                                                                                                                                                                                                                                                                                                                                                                                                                                                                                                                                                                                                                                                                                                                                                                                                                                                                                                                                                                                                                                                                                                                                                                                                                                                                                                                                                     |            |             |            |                                                                                                                                                                                                                                                                                                                                                                                                                                                                                                                                                                                                                                                                                                                                                                                                                                                                                                                                                                                                                                                                                                                                                                                                                                                                                                                                                                                                                                                                                                                                                                                                                                                                                                                                                                                                                                                                                                                                                                                                                                                                                                                                                                                                                                                                                                                                                                                                                                                                                                                                                                                               |   |            |             |             |   |            |             |             |   |            |             |             |   |            |             |             |   |            |             |             |   |            |             |             |   |            |             |            |   |            |             |            |   |            |             |             |   |            |             |             |   |            |             |             |   |             |             |             |   |             |             |             |   |             |             |             |   |             |            |             |   |             |             |             |   |             |             |             |   |             |             |             |   |             |            |             |   |             |             |             |   |             |             |             |   |             |             |             |   |             |             |             |   |             |            |             |   |             |             |             |   |             |             |            |   |             |            |             |   |             |             |             |   |             |            |            |                                                                                                                                                                                                                                                                                                                                                                                                                                                                                                                                                                                                                                                                                                                                                                                                                                                                                                                                                                                                                                                                                                                                                                                                                                                                                                                                                                                                                                                                                                                                                                                                                                                                                                                                                                                                                                                                                                                                                                                                                                                                                                                                                                                                                                                                                                                                                                                                                                                                                                                        |            |            |            |             |            |            |            |                                                                                                                                                                                                                                                                                                                                                                                                                                                                                                                                                                                                                                                                                                                                                                                                                                                                                                                                                                                                                                                                                                                                                                                                                                                                                                                                                                                                                                                                                                                                                                                                                                                                                                                                                                                                                                                                                                                                                                                                                                                                                                                                                                                                                                                                                                                                                                                                                                                                                                                                                                                             |   |            |             |             |   |            |             |             |   |            |             |             |   |            |             |             |   |            |             |             |   |            |             |             |   |            |             |            |   |            |             |            |   |            |            |             |   |            |             |             |   |            |             |             |   |             |             |             |   |             |             |             |   |             |            |             |   |             |             |             |   |             |             |             |   |             |            |             |   |             |             |             |   |             |             |             |   |             |             |             |   |             |             |             |   |             |             |             |   |             |             |             |   |             |            |             |   |             |             |             |   |             |             |            |   |             |             |             |   |             |            |             |   |            |            |            |   |            |            |            |   |            |            |            |
| H                                                                                                                                                                                                                                                                                                                                                                                                                                                                                                                                                                                                                                                                                                                                                                                                                                                                                                                                                                                                                                                                                                                                                                                                                                                                                                                                                                                                                                                                                                                                                                                                                                                                                                                                                                                                                                                                                                                                                                                                                                                                                                                                                                                                                                                                                                                                               | -0.36547400 | -1.13113300                                                                        | 0.03271200                                                                           |             |   |            |            |             |   |            |             |             |   |            |             |             |   |            |             |             |   |            |             |             |   |            |            |             |   |            |             |             |   |            |             |            |   |            |             |             |   |            |            |             |   |            |             |             |   |            |             |             |   |             |             |             |   |             |             |             |   |             |             |            |   |             |             |             |   |             |             |             |   |             |             |             |   |             |             |             |   |             |             |            |   |             |             |             |   |             |            |             |   |             |             |             |   |             |            |             |   |             |            |             |   |             |             |             |                                                                                                                                                                                                                                                                                                                                                                                                                                                                                                                                                                                                                                                                                                                                                                                                                                                                                                                                                                                                                                                                                                                                                                                                                                                                                                                                                                                                                                                                                                                                                                                                                                                                                                                                                                                                                                                                                                                                                                                                                                                                                                                                                                                                                                                                                                                                                                                                                                                                                                                     |            |             |            |                                                                                                                                                                                                                                                                                                                                                                                                                                                                                                                                                                                                                                                                                                                                                                                                                                                                                                                                                                                                                                                                                                                                                                                                                                                                                                                                                                                                                                                                                                                                                                                                                                                                                                                                                                                                                                                                                                                                                                                                                                                                                                                                                                                                                                                                                                                                                                                                                                                                                                                                                                                               |   |            |             |             |   |            |             |             |   |            |             |             |   |            |             |             |   |            |             |             |   |            |             |             |   |            |             |            |   |            |             |            |   |            |             |             |   |            |             |             |   |            |             |             |   |             |             |             |   |             |             |             |   |             |             |             |   |             |            |             |   |             |             |             |   |             |             |             |   |             |             |             |   |             |            |             |   |             |             |             |   |             |             |             |   |             |             |             |   |             |             |             |   |             |            |             |   |             |             |             |   |             |             |            |   |             |            |             |   |             |             |             |   |             |            |            |                                                                                                                                                                                                                                                                                                                                                                                                                                                                                                                                                                                                                                                                                                                                                                                                                                                                                                                                                                                                                                                                                                                                                                                                                                                                                                                                                                                                                                                                                                                                                                                                                                                                                                                                                                                                                                                                                                                                                                                                                                                                                                                                                                                                                                                                                                                                                                                                                                                                                                                        |            |            |            |             |            |            |            |                                                                                                                                                                                                                                                                                                                                                                                                                                                                                                                                                                                                                                                                                                                                                                                                                                                                                                                                                                                                                                                                                                                                                                                                                                                                                                                                                                                                                                                                                                                                                                                                                                                                                                                                                                                                                                                                                                                                                                                                                                                                                                                                                                                                                                                                                                                                                                                                                                                                                                                                                                                             |   |            |             |             |   |            |             |             |   |            |             |             |   |            |             |             |   |            |             |             |   |            |             |             |   |            |             |            |   |            |             |            |   |            |            |             |   |            |             |             |   |            |             |             |   |             |             |             |   |             |             |             |   |             |            |             |   |             |             |             |   |             |             |             |   |             |            |             |   |             |             |             |   |             |             |             |   |             |             |             |   |             |             |             |   |             |             |             |   |             |             |             |   |             |            |             |   |             |             |             |   |             |             |            |   |             |             |             |   |             |            |             |   |            |            |            |   |            |            |            |   |            |            |            |
| C                                                                                                                                                                                                                                                                                                                                                                                                                                                                                                                                                                                                                                                                                                                                                                                                                                                                                                                                                                                                                                                                                                                                                                                                                                                                                                                                                                                                                                                                                                                                                                                                                                                                                                                                                                                                                                                                                                                                                                                                                                                                                                                                                                                                                                                                                                                                               | -1.42678400 | 0.56386000                                                                         | -0.69157900                                                                          |             |   |            |            |             |   |            |             |             |   |            |             |             |   |            |             |             |   |            |             |             |   |            |            |             |   |            |             |             |   |            |             |            |   |            |             |             |   |            |            |             |   |            |             |             |   |            |             |             |   |             |             |             |   |             |             |             |   |             |             |            |   |             |             |             |   |             |             |             |   |             |             |             |   |             |             |             |   |             |             |            |   |             |             |             |   |             |            |             |   |             |             |             |   |             |            |             |   |             |            |             |   |             |             |             |                                                                                                                                                                                                                                                                                                                                                                                                                                                                                                                                                                                                                                                                                                                                                                                                                                                                                                                                                                                                                                                                                                                                                                                                                                                                                                                                                                                                                                                                                                                                                                                                                                                                                                                                                                                                                                                                                                                                                                                                                                                                                                                                                                                                                                                                                                                                                                                                                                                                                                                     |            |             |            |                                                                                                                                                                                                                                                                                                                                                                                                                                                                                                                                                                                                                                                                                                                                                                                                                                                                                                                                                                                                                                                                                                                                                                                                                                                                                                                                                                                                                                                                                                                                                                                                                                                                                                                                                                                                                                                                                                                                                                                                                                                                                                                                                                                                                                                                                                                                                                                                                                                                                                                                                                                               |   |            |             |             |   |            |             |             |   |            |             |             |   |            |             |             |   |            |             |             |   |            |             |             |   |            |             |            |   |            |             |            |   |            |             |             |   |            |             |             |   |            |             |             |   |             |             |             |   |             |             |             |   |             |             |             |   |             |            |             |   |             |             |             |   |             |             |             |   |             |             |             |   |             |            |             |   |             |             |             |   |             |             |             |   |             |             |             |   |             |             |             |   |             |            |             |   |             |             |             |   |             |             |            |   |             |            |             |   |             |             |             |   |             |            |            |                                                                                                                                                                                                                                                                                                                                                                                                                                                                                                                                                                                                                                                                                                                                                                                                                                                                                                                                                                                                                                                                                                                                                                                                                                                                                                                                                                                                                                                                                                                                                                                                                                                                                                                                                                                                                                                                                                                                                                                                                                                                                                                                                                                                                                                                                                                                                                                                                                                                                                                        |            |            |            |             |            |            |            |                                                                                                                                                                                                                                                                                                                                                                                                                                                                                                                                                                                                                                                                                                                                                                                                                                                                                                                                                                                                                                                                                                                                                                                                                                                                                                                                                                                                                                                                                                                                                                                                                                                                                                                                                                                                                                                                                                                                                                                                                                                                                                                                                                                                                                                                                                                                                                                                                                                                                                                                                                                             |   |            |             |             |   |            |             |             |   |            |             |             |   |            |             |             |   |            |             |             |   |            |             |             |   |            |             |            |   |            |             |            |   |            |            |             |   |            |             |             |   |            |             |             |   |             |             |             |   |             |             |             |   |             |            |             |   |             |             |             |   |             |             |             |   |             |            |             |   |             |             |             |   |             |             |             |   |             |             |             |   |             |             |             |   |             |             |             |   |             |             |             |   |             |            |             |   |             |             |             |   |             |             |            |   |             |             |             |   |             |            |             |   |            |            |            |   |            |            |            |   |            |            |            |
| O                                                                                                                                                                                                                                                                                                                                                                                                                                                                                                                                                                                                                                                                                                                                                                                                                                                                                                                                                                                                                                                                                                                                                                                                                                                                                                                                                                                                                                                                                                                                                                                                                                                                                                                                                                                                                                                                                                                                                                                                                                                                                                                                                                                                                                                                                                                                               | -1.46242600 | 1.76134800                                                                         | -1.19619300                                                                          |             |   |            |            |             |   |            |             |             |   |            |             |             |   |            |             |             |   |            |             |             |   |            |            |             |   |            |             |             |   |            |             |            |   |            |             |             |   |            |            |             |   |            |             |             |   |            |             |             |   |             |             |             |   |             |             |             |   |             |             |            |   |             |             |             |   |             |             |             |   |             |             |             |   |             |             |             |   |             |             |            |   |             |             |             |   |             |            |             |   |             |             |             |   |             |            |             |   |             |            |             |   |             |             |             |                                                                                                                                                                                                                                                                                                                                                                                                                                                                                                                                                                                                                                                                                                                                                                                                                                                                                                                                                                                                                                                                                                                                                                                                                                                                                                                                                                                                                                                                                                                                                                                                                                                                                                                                                                                                                                                                                                                                                                                                                                                                                                                                                                                                                                                                                                                                                                                                                                                                                                                     |            |             |            |                                                                                                                                                                                                                                                                                                                                                                                                                                                                                                                                                                                                                                                                                                                                                                                                                                                                                                                                                                                                                                                                                                                                                                                                                                                                                                                                                                                                                                                                                                                                                                                                                                                                                                                                                                                                                                                                                                                                                                                                                                                                                                                                                                                                                                                                                                                                                                                                                                                                                                                                                                                               |   |            |             |             |   |            |             |             |   |            |             |             |   |            |             |             |   |            |             |             |   |            |             |             |   |            |             |            |   |            |             |            |   |            |             |             |   |            |             |             |   |            |             |             |   |             |             |             |   |             |             |             |   |             |             |             |   |             |            |             |   |             |             |             |   |             |             |             |   |             |             |             |   |             |            |             |   |             |             |             |   |             |             |             |   |             |             |             |   |             |             |             |   |             |            |             |   |             |             |             |   |             |             |            |   |             |            |             |   |             |             |             |   |             |            |            |                                                                                                                                                                                                                                                                                                                                                                                                                                                                                                                                                                                                                                                                                                                                                                                                                                                                                                                                                                                                                                                                                                                                                                                                                                                                                                                                                                                                                                                                                                                                                                                                                                                                                                                                                                                                                                                                                                                                                                                                                                                                                                                                                                                                                                                                                                                                                                                                                                                                                                                        |            |            |            |             |            |            |            |                                                                                                                                                                                                                                                                                                                                                                                                                                                                                                                                                                                                                                                                                                                                                                                                                                                                                                                                                                                                                                                                                                                                                                                                                                                                                                                                                                                                                                                                                                                                                                                                                                                                                                                                                                                                                                                                                                                                                                                                                                                                                                                                                                                                                                                                                                                                                                                                                                                                                                                                                                                             |   |            |             |             |   |            |             |             |   |            |             |             |   |            |             |             |   |            |             |             |   |            |             |             |   |            |             |            |   |            |             |            |   |            |            |             |   |            |             |             |   |            |             |             |   |             |             |             |   |             |             |             |   |             |            |             |   |             |             |             |   |             |             |             |   |             |            |             |   |             |             |             |   |             |             |             |   |             |             |             |   |             |             |             |   |             |             |             |   |             |             |             |   |             |            |             |   |             |             |             |   |             |             |            |   |             |             |             |   |             |            |             |   |            |            |            |   |            |            |            |   |            |            |            |
| C                                                                                                                                                                                                                                                                                                                                                                                                                                                                                                                                                                                                                                                                                                                                                                                                                                                                                                                                                                                                                                                                                                                                                                                                                                                                                                                                                                                                                                                                                                                                                                                                                                                                                                                                                                                                                                                                                                                                                                                                                                                                                                                                                                                                                                                                                                                                               | -2.73959900 | -0.04606200                                                                        | -0.30713600                                                                          |             |   |            |            |             |   |            |             |             |   |            |             |             |   |            |             |             |   |            |             |             |   |            |            |             |   |            |             |             |   |            |             |            |   |            |             |             |   |            |            |             |   |            |             |             |   |            |             |             |   |             |             |             |   |             |             |             |   |             |             |            |   |             |             |             |   |             |             |             |   |             |             |             |   |             |             |             |   |             |             |            |   |             |             |             |   |             |            |             |   |             |             |             |   |             |            |             |   |             |            |             |   |             |             |             |                                                                                                                                                                                                                                                                                                                                                                                                                                                                                                                                                                                                                                                                                                                                                                                                                                                                                                                                                                                                                                                                                                                                                                                                                                                                                                                                                                                                                                                                                                                                                                                                                                                                                                                                                                                                                                                                                                                                                                                                                                                                                                                                                                                                                                                                                                                                                                                                                                                                                                                     |            |             |            |                                                                                                                                                                                                                                                                                                                                                                                                                                                                                                                                                                                                                                                                                                                                                                                                                                                                                                                                                                                                                                                                                                                                                                                                                                                                                                                                                                                                                                                                                                                                                                                                                                                                                                                                                                                                                                                                                                                                                                                                                                                                                                                                                                                                                                                                                                                                                                                                                                                                                                                                                                                               |   |            |             |             |   |            |             |             |   |            |             |             |   |            |             |             |   |            |             |             |   |            |             |             |   |            |             |            |   |            |             |            |   |            |             |             |   |            |             |             |   |            |             |             |   |             |             |             |   |             |             |             |   |             |             |             |   |             |            |             |   |             |             |             |   |             |             |             |   |             |             |             |   |             |            |             |   |             |             |             |   |             |             |             |   |             |             |             |   |             |             |             |   |             |            |             |   |             |             |             |   |             |             |            |   |             |            |             |   |             |             |             |   |             |            |            |                                                                                                                                                                                                                                                                                                                                                                                                                                                                                                                                                                                                                                                                                                                                                                                                                                                                                                                                                                                                                                                                                                                                                                                                                                                                                                                                                                                                                                                                                                                                                                                                                                                                                                                                                                                                                                                                                                                                                                                                                                                                                                                                                                                                                                                                                                                                                                                                                                                                                                                        |            |            |            |             |            |            |            |                                                                                                                                                                                                                                                                                                                                                                                                                                                                                                                                                                                                                                                                                                                                                                                                                                                                                                                                                                                                                                                                                                                                                                                                                                                                                                                                                                                                                                                                                                                                                                                                                                                                                                                                                                                                                                                                                                                                                                                                                                                                                                                                                                                                                                                                                                                                                                                                                                                                                                                                                                                             |   |            |             |             |   |            |             |             |   |            |             |             |   |            |             |             |   |            |             |             |   |            |             |             |   |            |             |            |   |            |             |            |   |            |            |             |   |            |             |             |   |            |             |             |   |             |             |             |   |             |             |             |   |             |            |             |   |             |             |             |   |             |             |             |   |             |            |             |   |             |             |             |   |             |             |             |   |             |             |             |   |             |             |             |   |             |             |             |   |             |             |             |   |             |            |             |   |             |             |             |   |             |             |            |   |             |             |             |   |             |            |             |   |            |            |            |   |            |            |            |   |            |            |            |
| C                                                                                                                                                                                                                                                                                                                                                                                                                                                                                                                                                                                                                                                                                                                                                                                                                                                                                                                                                                                                                                                                                                                                                                                                                                                                                                                                                                                                                                                                                                                                                                                                                                                                                                                                                                                                                                                                                                                                                                                                                                                                                                                                                                                                                                                                                                                                               | -3.87087700 | 0.78009300                                                                         | -0.23964700                                                                          |             |   |            |            |             |   |            |             |             |   |            |             |             |   |            |             |             |   |            |             |             |   |            |            |             |   |            |             |             |   |            |             |            |   |            |             |             |   |            |            |             |   |            |             |             |   |            |             |             |   |             |             |             |   |             |             |             |   |             |             |            |   |             |             |             |   |             |             |             |   |             |             |             |   |             |             |             |   |             |             |            |   |             |             |             |   |             |            |             |   |             |             |             |   |             |            |             |   |             |            |             |   |             |             |             |                                                                                                                                                                                                                                                                                                                                                                                                                                                                                                                                                                                                                                                                                                                                                                                                                                                                                                                                                                                                                                                                                                                                                                                                                                                                                                                                                                                                                                                                                                                                                                                                                                                                                                                                                                                                                                                                                                                                                                                                                                                                                                                                                                                                                                                                                                                                                                                                                                                                                                                     |            |             |            |                                                                                                                                                                                                                                                                                                                                                                                                                                                                                                                                                                                                                                                                                                                                                                                                                                                                                                                                                                                                                                                                                                                                                                                                                                                                                                                                                                                                                                                                                                                                                                                                                                                                                                                                                                                                                                                                                                                                                                                                                                                                                                                                                                                                                                                                                                                                                                                                                                                                                                                                                                                               |   |            |             |             |   |            |             |             |   |            |             |             |   |            |             |             |   |            |             |             |   |            |             |             |   |            |             |            |   |            |             |            |   |            |             |             |   |            |             |             |   |            |             |             |   |             |             |             |   |             |             |             |   |             |             |             |   |             |            |             |   |             |             |             |   |             |             |             |   |             |             |             |   |             |            |             |   |             |             |             |   |             |             |             |   |             |             |             |   |             |             |             |   |             |            |             |   |             |             |             |   |             |             |            |   |             |            |             |   |             |             |             |   |             |            |            |                                                                                                                                                                                                                                                                                                                                                                                                                                                                                                                                                                                                                                                                                                                                                                                                                                                                                                                                                                                                                                                                                                                                                                                                                                                                                                                                                                                                                                                                                                                                                                                                                                                                                                                                                                                                                                                                                                                                                                                                                                                                                                                                                                                                                                                                                                                                                                                                                                                                                                                        |            |            |            |             |            |            |            |                                                                                                                                                                                                                                                                                                                                                                                                                                                                                                                                                                                                                                                                                                                                                                                                                                                                                                                                                                                                                                                                                                                                                                                                                                                                                                                                                                                                                                                                                                                                                                                                                                                                                                                                                                                                                                                                                                                                                                                                                                                                                                                                                                                                                                                                                                                                                                                                                                                                                                                                                                                             |   |            |             |             |   |            |             |             |   |            |             |             |   |            |             |             |   |            |             |             |   |            |             |             |   |            |             |            |   |            |             |            |   |            |            |             |   |            |             |             |   |            |             |             |   |             |             |             |   |             |             |             |   |             |            |             |   |             |             |             |   |             |             |             |   |             |            |             |   |             |             |             |   |             |             |             |   |             |             |             |   |             |             |             |   |             |             |             |   |             |             |             |   |             |            |             |   |             |             |             |   |             |             |            |   |             |             |             |   |             |            |             |   |            |            |            |   |            |            |            |   |            |            |            |
| C                                                                                                                                                                                                                                                                                                                                                                                                                                                                                                                                                                                                                                                                                                                                                                                                                                                                                                                                                                                                                                                                                                                                                                                                                                                                                                                                                                                                                                                                                                                                                                                                                                                                                                                                                                                                                                                                                                                                                                                                                                                                                                                                                                                                                                                                                                                                               | -2.94157400 | -1.40699300                                                                        | -0.01747900                                                                          |             |   |            |            |             |   |            |             |             |   |            |             |             |   |            |             |             |   |            |             |             |   |            |            |             |   |            |             |             |   |            |             |            |   |            |             |             |   |            |            |             |   |            |             |             |   |            |             |             |   |             |             |             |   |             |             |             |   |             |             |            |   |             |             |             |   |             |             |             |   |             |             |             |   |             |             |             |   |             |             |            |   |             |             |             |   |             |            |             |   |             |             |             |   |             |            |             |   |             |            |             |   |             |             |             |                                                                                                                                                                                                                                                                                                                                                                                                                                                                                                                                                                                                                                                                                                                                                                                                                                                                                                                                                                                                                                                                                                                                                                                                                                                                                                                                                                                                                                                                                                                                                                                                                                                                                                                                                                                                                                                                                                                                                                                                                                                                                                                                                                                                                                                                                                                                                                                                                                                                                                                     |            |             |            |                                                                                                                                                                                                                                                                                                                                                                                                                                                                                                                                                                                                                                                                                                                                                                                                                                                                                                                                                                                                                                                                                                                                                                                                                                                                                                                                                                                                                                                                                                                                                                                                                                                                                                                                                                                                                                                                                                                                                                                                                                                                                                                                                                                                                                                                                                                                                                                                                                                                                                                                                                                               |   |            |             |             |   |            |             |             |   |            |             |             |   |            |             |             |   |            |             |             |   |            |             |             |   |            |             |            |   |            |             |            |   |            |             |             |   |            |             |             |   |            |             |             |   |             |             |             |   |             |             |             |   |             |             |             |   |             |            |             |   |             |             |             |   |             |             |             |   |             |             |             |   |             |            |             |   |             |             |             |   |             |             |             |   |             |             |             |   |             |             |             |   |             |            |             |   |             |             |             |   |             |             |            |   |             |            |             |   |             |             |             |   |             |            |            |                                                                                                                                                                                                                                                                                                                                                                                                                                                                                                                                                                                                                                                                                                                                                                                                                                                                                                                                                                                                                                                                                                                                                                                                                                                                                                                                                                                                                                                                                                                                                                                                                                                                                                                                                                                                                                                                                                                                                                                                                                                                                                                                                                                                                                                                                                                                                                                                                                                                                                                        |            |            |            |             |            |            |            |                                                                                                                                                                                                                                                                                                                                                                                                                                                                                                                                                                                                                                                                                                                                                                                                                                                                                                                                                                                                                                                                                                                                                                                                                                                                                                                                                                                                                                                                                                                                                                                                                                                                                                                                                                                                                                                                                                                                                                                                                                                                                                                                                                                                                                                                                                                                                                                                                                                                                                                                                                                             |   |            |             |             |   |            |             |             |   |            |             |             |   |            |             |             |   |            |             |             |   |            |             |             |   |            |             |            |   |            |             |            |   |            |            |             |   |            |             |             |   |            |             |             |   |             |             |             |   |             |             |             |   |             |            |             |   |             |             |             |   |             |             |             |   |             |            |             |   |             |             |             |   |             |             |             |   |             |             |             |   |             |             |             |   |             |             |             |   |             |             |             |   |             |            |             |   |             |             |             |   |             |             |            |   |             |             |             |   |             |            |             |   |            |            |            |   |            |            |            |   |            |            |            |
| C                                                                                                                                                                                                                                                                                                                                                                                                                                                                                                                                                                                                                                                                                                                                                                                                                                                                                                                                                                                                                                                                                                                                                                                                                                                                                                                                                                                                                                                                                                                                                                                                                                                                                                                                                                                                                                                                                                                                                                                                                                                                                                                                                                                                                                                                                                                                               | -5.11820900 | 0.28981700                                                                         | 0.12075500                                                                           |             |   |            |            |             |   |            |             |             |   |            |             |             |   |            |             |             |   |            |             |             |   |            |            |             |   |            |             |             |   |            |             |            |   |            |             |             |   |            |            |             |   |            |             |             |   |            |             |             |   |             |             |             |   |             |             |             |   |             |             |            |   |             |             |             |   |             |             |             |   |             |             |             |   |             |             |             |   |             |             |            |   |             |             |             |   |             |            |             |   |             |             |             |   |             |            |             |   |             |            |             |   |             |             |             |                                                                                                                                                                                                                                                                                                                                                                                                                                                                                                                                                                                                                                                                                                                                                                                                                                                                                                                                                                                                                                                                                                                                                                                                                                                                                                                                                                                                                                                                                                                                                                                                                                                                                                                                                                                                                                                                                                                                                                                                                                                                                                                                                                                                                                                                                                                                                                                                                                                                                                                     |            |             |            |                                                                                                                                                                                                                                                                                                                                                                                                                                                                                                                                                                                                                                                                                                                                                                                                                                                                                                                                                                                                                                                                                                                                                                                                                                                                                                                                                                                                                                                                                                                                                                                                                                                                                                                                                                                                                                                                                                                                                                                                                                                                                                                                                                                                                                                                                                                                                                                                                                                                                                                                                                                               |   |            |             |             |   |            |             |             |   |            |             |             |   |            |             |             |   |            |             |             |   |            |             |             |   |            |             |            |   |            |             |            |   |            |             |             |   |            |             |             |   |            |             |             |   |             |             |             |   |             |             |             |   |             |             |             |   |             |            |             |   |             |             |             |   |             |             |             |   |             |             |             |   |             |            |             |   |             |             |             |   |             |             |             |   |             |             |             |   |             |             |             |   |             |            |             |   |             |             |             |   |             |             |            |   |             |            |             |   |             |             |             |   |             |            |            |                                                                                                                                                                                                                                                                                                                                                                                                                                                                                                                                                                                                                                                                                                                                                                                                                                                                                                                                                                                                                                                                                                                                                                                                                                                                                                                                                                                                                                                                                                                                                                                                                                                                                                                                                                                                                                                                                                                                                                                                                                                                                                                                                                                                                                                                                                                                                                                                                                                                                                                        |            |            |            |             |            |            |            |                                                                                                                                                                                                                                                                                                                                                                                                                                                                                                                                                                                                                                                                                                                                                                                                                                                                                                                                                                                                                                                                                                                                                                                                                                                                                                                                                                                                                                                                                                                                                                                                                                                                                                                                                                                                                                                                                                                                                                                                                                                                                                                                                                                                                                                                                                                                                                                                                                                                                                                                                                                             |   |            |             |             |   |            |             |             |   |            |             |             |   |            |             |             |   |            |             |             |   |            |             |             |   |            |             |            |   |            |             |            |   |            |            |             |   |            |             |             |   |            |             |             |   |             |             |             |   |             |             |             |   |             |            |             |   |             |             |             |   |             |             |             |   |             |            |             |   |             |             |             |   |             |             |             |   |             |             |             |   |             |             |             |   |             |             |             |   |             |             |             |   |             |            |             |   |             |             |             |   |             |             |            |   |             |             |             |   |             |            |             |   |            |            |            |   |            |            |            |   |            |            |            |
| H                                                                                                                                                                                                                                                                                                                                                                                                                                                                                                                                                                                                                                                                                                                                                                                                                                                                                                                                                                                                                                                                                                                                                                                                                                                                                                                                                                                                                                                                                                                                                                                                                                                                                                                                                                                                                                                                                                                                                                                                                                                                                                                                                                                                                                                                                                                                               | -3.73864300 | 1.82726800                                                                         | -0.47749100                                                                          |             |   |            |            |             |   |            |             |             |   |            |             |             |   |            |             |             |   |            |             |             |   |            |            |             |   |            |             |             |   |            |             |            |   |            |             |             |   |            |            |             |   |            |             |             |   |            |             |             |   |             |             |             |   |             |             |             |   |             |             |            |   |             |             |             |   |             |             |             |   |             |             |             |   |             |             |             |   |             |             |            |   |             |             |             |   |             |            |             |   |             |             |             |   |             |            |             |   |             |            |             |   |             |             |             |                                                                                                                                                                                                                                                                                                                                                                                                                                                                                                                                                                                                                                                                                                                                                                                                                                                                                                                                                                                                                                                                                                                                                                                                                                                                                                                                                                                                                                                                                                                                                                                                                                                                                                                                                                                                                                                                                                                                                                                                                                                                                                                                                                                                                                                                                                                                                                                                                                                                                                                     |            |             |            |                                                                                                                                                                                                                                                                                                                                                                                                                                                                                                                                                                                                                                                                                                                                                                                                                                                                                                                                                                                                                                                                                                                                                                                                                                                                                                                                                                                                                                                                                                                                                                                                                                                                                                                                                                                                                                                                                                                                                                                                                                                                                                                                                                                                                                                                                                                                                                                                                                                                                                                                                                                               |   |            |             |             |   |            |             |             |   |            |             |             |   |            |             |             |   |            |             |             |   |            |             |             |   |            |             |            |   |            |             |            |   |            |             |             |   |            |             |             |   |            |             |             |   |             |             |             |   |             |             |             |   |             |             |             |   |             |            |             |   |             |             |             |   |             |             |             |   |             |             |             |   |             |            |             |   |             |             |             |   |             |             |             |   |             |             |             |   |             |             |             |   |             |            |             |   |             |             |             |   |             |             |            |   |             |            |             |   |             |             |             |   |             |            |            |                                                                                                                                                                                                                                                                                                                                                                                                                                                                                                                                                                                                                                                                                                                                                                                                                                                                                                                                                                                                                                                                                                                                                                                                                                                                                                                                                                                                                                                                                                                                                                                                                                                                                                                                                                                                                                                                                                                                                                                                                                                                                                                                                                                                                                                                                                                                                                                                                                                                                                                        |            |            |            |             |            |            |            |                                                                                                                                                                                                                                                                                                                                                                                                                                                                                                                                                                                                                                                                                                                                                                                                                                                                                                                                                                                                                                                                                                                                                                                                                                                                                                                                                                                                                                                                                                                                                                                                                                                                                                                                                                                                                                                                                                                                                                                                                                                                                                                                                                                                                                                                                                                                                                                                                                                                                                                                                                                             |   |            |             |             |   |            |             |             |   |            |             |             |   |            |             |             |   |            |             |             |   |            |             |             |   |            |             |            |   |            |             |            |   |            |            |             |   |            |             |             |   |            |             |             |   |             |             |             |   |             |             |             |   |             |            |             |   |             |             |             |   |             |             |             |   |             |            |             |   |             |             |             |   |             |             |             |   |             |             |             |   |             |             |             |   |             |             |             |   |             |             |             |   |             |            |             |   |             |             |             |   |             |             |            |   |             |             |             |   |             |            |             |   |            |            |            |   |            |            |            |   |            |            |            |
| C                                                                                                                                                                                                                                                                                                                                                                                                                                                                                                                                                                                                                                                                                                                                                                                                                                                                                                                                                                                                                                                                                                                                                                                                                                                                                                                                                                                                                                                                                                                                                                                                                                                                                                                                                                                                                                                                                                                                                                                                                                                                                                                                                                                                                                                                                                                                               | -4.18427000 | -1.89860700                                                                        | 0.34223100                                                                           |             |   |            |            |             |   |            |             |             |   |            |             |             |   |            |             |             |   |            |             |             |   |            |            |             |   |            |             |             |   |            |             |            |   |            |             |             |   |            |            |             |   |            |             |             |   |            |             |             |   |             |             |             |   |             |             |             |   |             |             |            |   |             |             |             |   |             |             |             |   |             |             |             |   |             |             |             |   |             |             |            |   |             |             |             |   |             |            |             |   |             |             |             |   |             |            |             |   |             |            |             |   |             |             |             |                                                                                                                                                                                                                                                                                                                                                                                                                                                                                                                                                                                                                                                                                                                                                                                                                                                                                                                                                                                                                                                                                                                                                                                                                                                                                                                                                                                                                                                                                                                                                                                                                                                                                                                                                                                                                                                                                                                                                                                                                                                                                                                                                                                                                                                                                                                                                                                                                                                                                                                     |            |             |            |                                                                                                                                                                                                                                                                                                                                                                                                                                                                                                                                                                                                                                                                                                                                                                                                                                                                                                                                                                                                                                                                                                                                                                                                                                                                                                                                                                                                                                                                                                                                                                                                                                                                                                                                                                                                                                                                                                                                                                                                                                                                                                                                                                                                                                                                                                                                                                                                                                                                                                                                                                                               |   |            |             |             |   |            |             |             |   |            |             |             |   |            |             |             |   |            |             |             |   |            |             |             |   |            |             |            |   |            |             |            |   |            |             |             |   |            |             |             |   |            |             |             |   |             |             |             |   |             |             |             |   |             |             |             |   |             |            |             |   |             |             |             |   |             |             |             |   |             |             |             |   |             |            |             |   |             |             |             |   |             |             |             |   |             |             |             |   |             |             |             |   |             |            |             |   |             |             |             |   |             |             |            |   |             |            |             |   |             |             |             |   |             |            |            |                                                                                                                                                                                                                                                                                                                                                                                                                                                                                                                                                                                                                                                                                                                                                                                                                                                                                                                                                                                                                                                                                                                                                                                                                                                                                                                                                                                                                                                                                                                                                                                                                                                                                                                                                                                                                                                                                                                                                                                                                                                                                                                                                                                                                                                                                                                                                                                                                                                                                                                        |            |            |            |             |            |            |            |                                                                                                                                                                                                                                                                                                                                                                                                                                                                                                                                                                                                                                                                                                                                                                                                                                                                                                                                                                                                                                                                                                                                                                                                                                                                                                                                                                                                                                                                                                                                                                                                                                                                                                                                                                                                                                                                                                                                                                                                                                                                                                                                                                                                                                                                                                                                                                                                                                                                                                                                                                                             |   |            |             |             |   |            |             |             |   |            |             |             |   |            |             |             |   |            |             |             |   |            |             |             |   |            |             |            |   |            |             |            |   |            |            |             |   |            |             |             |   |            |             |             |   |             |             |             |   |             |             |             |   |             |            |             |   |             |             |             |   |             |             |             |   |             |            |             |   |             |             |             |   |             |             |             |   |             |             |             |   |             |             |             |   |             |             |             |   |             |             |             |   |             |            |             |   |             |             |             |   |             |             |            |   |             |             |             |   |             |            |             |   |            |            |            |   |            |            |            |   |            |            |            |
| H                                                                                                                                                                                                                                                                                                                                                                                                                                                                                                                                                                                                                                                                                                                                                                                                                                                                                                                                                                                                                                                                                                                                                                                                                                                                                                                                                                                                                                                                                                                                                                                                                                                                                                                                                                                                                                                                                                                                                                                                                                                                                                                                                                                                                                                                                                                                               | -2.11378100 | -2.10079400                                                                        | -0.09395900                                                                          |             |   |            |            |             |   |            |             |             |   |            |             |             |   |            |             |             |   |            |             |             |   |            |            |             |   |            |             |             |   |            |             |            |   |            |             |             |   |            |            |             |   |            |             |             |   |            |             |             |   |             |             |             |   |             |             |             |   |             |             |            |   |             |             |             |   |             |             |             |   |             |             |             |   |             |             |             |   |             |             |            |   |             |             |             |   |             |            |             |   |             |             |             |   |             |            |             |   |             |            |             |   |             |             |             |                                                                                                                                                                                                                                                                                                                                                                                                                                                                                                                                                                                                                                                                                                                                                                                                                                                                                                                                                                                                                                                                                                                                                                                                                                                                                                                                                                                                                                                                                                                                                                                                                                                                                                                                                                                                                                                                                                                                                                                                                                                                                                                                                                                                                                                                                                                                                                                                                                                                                                                     |            |             |            |                                                                                                                                                                                                                                                                                                                                                                                                                                                                                                                                                                                                                                                                                                                                                                                                                                                                                                                                                                                                                                                                                                                                                                                                                                                                                                                                                                                                                                                                                                                                                                                                                                                                                                                                                                                                                                                                                                                                                                                                                                                                                                                                                                                                                                                                                                                                                                                                                                                                                                                                                                                               |   |            |             |             |   |            |             |             |   |            |             |             |   |            |             |             |   |            |             |             |   |            |             |             |   |            |             |            |   |            |             |            |   |            |             |             |   |            |             |             |   |            |             |             |   |             |             |             |   |             |             |             |   |             |             |             |   |             |            |             |   |             |             |             |   |             |             |             |   |             |             |             |   |             |            |             |   |             |             |             |   |             |             |             |   |             |             |             |   |             |             |             |   |             |            |             |   |             |             |             |   |             |             |            |   |             |            |             |   |             |             |             |   |             |            |            |                                                                                                                                                                                                                                                                                                                                                                                                                                                                                                                                                                                                                                                                                                                                                                                                                                                                                                                                                                                                                                                                                                                                                                                                                                                                                                                                                                                                                                                                                                                                                                                                                                                                                                                                                                                                                                                                                                                                                                                                                                                                                                                                                                                                                                                                                                                                                                                                                                                                                                                        |            |            |            |             |            |            |            |                                                                                                                                                                                                                                                                                                                                                                                                                                                                                                                                                                                                                                                                                                                                                                                                                                                                                                                                                                                                                                                                                                                                                                                                                                                                                                                                                                                                                                                                                                                                                                                                                                                                                                                                                                                                                                                                                                                                                                                                                                                                                                                                                                                                                                                                                                                                                                                                                                                                                                                                                                                             |   |            |             |             |   |            |             |             |   |            |             |             |   |            |             |             |   |            |             |             |   |            |             |             |   |            |             |            |   |            |             |            |   |            |            |             |   |            |             |             |   |            |             |             |   |             |             |             |   |             |             |             |   |             |            |             |   |             |             |             |   |             |             |             |   |             |            |             |   |             |             |             |   |             |             |             |   |             |             |             |   |             |             |             |   |             |             |             |   |             |             |             |   |             |            |             |   |             |             |             |   |             |             |            |   |             |             |             |   |             |            |             |   |            |            |            |   |            |            |            |   |            |            |            |
| C                                                                                                                                                                                                                                                                                                                                                                                                                                                                                                                                                                                                                                                                                                                                                                                                                                                                                                                                                                                                                                                                                                                                                                                                                                                                                                                                                                                                                                                                                                                                                                                                                                                                                                                                                                                                                                                                                                                                                                                                                                                                                                                                                                                                                                                                                                                                               | -5.28929900 | -1.05448700                                                                        | 0.41916900                                                                           |             |   |            |            |             |   |            |             |             |   |            |             |             |   |            |             |             |   |            |             |             |   |            |            |             |   |            |             |             |   |            |             |            |   |            |             |             |   |            |            |             |   |            |             |             |   |            |             |             |   |             |             |             |   |             |             |             |   |             |             |            |   |             |             |             |   |             |             |             |   |             |             |             |   |             |             |             |   |             |             |            |   |             |             |             |   |             |            |             |   |             |             |             |   |             |            |             |   |             |            |             |   |             |             |             |                                                                                                                                                                                                                                                                                                                                                                                                                                                                                                                                                                                                                                                                                                                                                                                                                                                                                                                                                                                                                                                                                                                                                                                                                                                                                                                                                                                                                                                                                                                                                                                                                                                                                                                                                                                                                                                                                                                                                                                                                                                                                                                                                                                                                                                                                                                                                                                                                                                                                                                     |            |             |            |                                                                                                                                                                                                                                                                                                                                                                                                                                                                                                                                                                                                                                                                                                                                                                                                                                                                                                                                                                                                                                                                                                                                                                                                                                                                                                                                                                                                                                                                                                                                                                                                                                                                                                                                                                                                                                                                                                                                                                                                                                                                                                                                                                                                                                                                                                                                                                                                                                                                                                                                                                                               |   |            |             |             |   |            |             |             |   |            |             |             |   |            |             |             |   |            |             |             |   |            |             |             |   |            |             |            |   |            |             |            |   |            |             |             |   |            |             |             |   |            |             |             |   |             |             |             |   |             |             |             |   |             |             |             |   |             |            |             |   |             |             |             |   |             |             |             |   |             |             |             |   |             |            |             |   |             |             |             |   |             |             |             |   |             |             |             |   |             |             |             |   |             |            |             |   |             |             |             |   |             |             |            |   |             |            |             |   |             |             |             |   |             |            |            |                                                                                                                                                                                                                                                                                                                                                                                                                                                                                                                                                                                                                                                                                                                                                                                                                                                                                                                                                                                                                                                                                                                                                                                                                                                                                                                                                                                                                                                                                                                                                                                                                                                                                                                                                                                                                                                                                                                                                                                                                                                                                                                                                                                                                                                                                                                                                                                                                                                                                                                        |            |            |            |             |            |            |            |                                                                                                                                                                                                                                                                                                                                                                                                                                                                                                                                                                                                                                                                                                                                                                                                                                                                                                                                                                                                                                                                                                                                                                                                                                                                                                                                                                                                                                                                                                                                                                                                                                                                                                                                                                                                                                                                                                                                                                                                                                                                                                                                                                                                                                                                                                                                                                                                                                                                                                                                                                                             |   |            |             |             |   |            |             |             |   |            |             |             |   |            |             |             |   |            |             |             |   |            |             |             |   |            |             |            |   |            |             |            |   |            |            |             |   |            |             |             |   |            |             |             |   |             |             |             |   |             |             |             |   |             |            |             |   |             |             |             |   |             |             |             |   |             |            |             |   |             |             |             |   |             |             |             |   |             |             |             |   |             |             |             |   |             |             |             |   |             |             |             |   |             |            |             |   |             |             |             |   |             |             |            |   |             |             |             |   |             |            |             |   |            |            |            |   |            |            |            |   |            |            |            |
| H                                                                                                                                                                                                                                                                                                                                                                                                                                                                                                                                                                                                                                                                                                                                                                                                                                                                                                                                                                                                                                                                                                                                                                                                                                                                                                                                                                                                                                                                                                                                                                                                                                                                                                                                                                                                                                                                                                                                                                                                                                                                                                                                                                                                                                                                                                                                               | -5.96559800 | 0.96524500                                                                         | 0.16764400                                                                           |             |   |            |            |             |   |            |             |             |   |            |             |             |   |            |             |             |   |            |             |             |   |            |            |             |   |            |             |             |   |            |             |            |   |            |             |             |   |            |            |             |   |            |             |             |   |            |             |             |   |             |             |             |   |             |             |             |   |             |             |            |   |             |             |             |   |             |             |             |   |             |             |             |   |             |             |             |   |             |             |            |   |             |             |             |   |             |            |             |   |             |             |             |   |             |            |             |   |             |            |             |   |             |             |             |                                                                                                                                                                                                                                                                                                                                                                                                                                                                                                                                                                                                                                                                                                                                                                                                                                                                                                                                                                                                                                                                                                                                                                                                                                                                                                                                                                                                                                                                                                                                                                                                                                                                                                                                                                                                                                                                                                                                                                                                                                                                                                                                                                                                                                                                                                                                                                                                                                                                                                                     |            |             |            |                                                                                                                                                                                                                                                                                                                                                                                                                                                                                                                                                                                                                                                                                                                                                                                                                                                                                                                                                                                                                                                                                                                                                                                                                                                                                                                                                                                                                                                                                                                                                                                                                                                                                                                                                                                                                                                                                                                                                                                                                                                                                                                                                                                                                                                                                                                                                                                                                                                                                                                                                                                               |   |            |             |             |   |            |             |             |   |            |             |             |   |            |             |             |   |            |             |             |   |            |             |             |   |            |             |            |   |            |             |            |   |            |             |             |   |            |             |             |   |            |             |             |   |             |             |             |   |             |             |             |   |             |             |             |   |             |            |             |   |             |             |             |   |             |             |             |   |             |             |             |   |             |            |             |   |             |             |             |   |             |             |             |   |             |             |             |   |             |             |             |   |             |            |             |   |             |             |             |   |             |             |            |   |             |            |             |   |             |             |             |   |             |            |            |                                                                                                                                                                                                                                                                                                                                                                                                                                                                                                                                                                                                                                                                                                                                                                                                                                                                                                                                                                                                                                                                                                                                                                                                                                                                                                                                                                                                                                                                                                                                                                                                                                                                                                                                                                                                                                                                                                                                                                                                                                                                                                                                                                                                                                                                                                                                                                                                                                                                                                                        |            |            |            |             |            |            |            |                                                                                                                                                                                                                                                                                                                                                                                                                                                                                                                                                                                                                                                                                                                                                                                                                                                                                                                                                                                                                                                                                                                                                                                                                                                                                                                                                                                                                                                                                                                                                                                                                                                                                                                                                                                                                                                                                                                                                                                                                                                                                                                                                                                                                                                                                                                                                                                                                                                                                                                                                                                             |   |            |             |             |   |            |             |             |   |            |             |             |   |            |             |             |   |            |             |             |   |            |             |             |   |            |             |            |   |            |             |            |   |            |            |             |   |            |             |             |   |            |             |             |   |             |             |             |   |             |             |             |   |             |            |             |   |             |             |             |   |             |             |             |   |             |            |             |   |             |             |             |   |             |             |             |   |             |             |             |   |             |             |             |   |             |             |             |   |             |             |             |   |             |            |             |   |             |             |             |   |             |             |            |   |             |             |             |   |             |            |             |   |            |            |            |   |            |            |            |   |            |            |            |
| H                                                                                                                                                                                                                                                                                                                                                                                                                                                                                                                                                                                                                                                                                                                                                                                                                                                                                                                                                                                                                                                                                                                                                                                                                                                                                                                                                                                                                                                                                                                                                                                                                                                                                                                                                                                                                                                                                                                                                                                                                                                                                                                                                                                                                                                                                                                                               | -4.29706400 | -2.95600900                                                                        | 0.55441300                                                                           |             |   |            |            |             |   |            |             |             |   |            |             |             |   |            |             |             |   |            |             |             |   |            |            |             |   |            |             |             |   |            |             |            |   |            |             |             |   |            |            |             |   |            |             |             |   |            |             |             |   |             |             |             |   |             |             |             |   |             |             |            |   |             |             |             |   |             |             |             |   |             |             |             |   |             |             |             |   |             |             |            |   |             |             |             |   |             |            |             |   |             |             |             |   |             |            |             |   |             |            |             |   |             |             |             |                                                                                                                                                                                                                                                                                                                                                                                                                                                                                                                                                                                                                                                                                                                                                                                                                                                                                                                                                                                                                                                                                                                                                                                                                                                                                                                                                                                                                                                                                                                                                                                                                                                                                                                                                                                                                                                                                                                                                                                                                                                                                                                                                                                                                                                                                                                                                                                                                                                                                                                     |            |             |            |                                                                                                                                                                                                                                                                                                                                                                                                                                                                                                                                                                                                                                                                                                                                                                                                                                                                                                                                                                                                                                                                                                                                                                                                                                                                                                                                                                                                                                                                                                                                                                                                                                                                                                                                                                                                                                                                                                                                                                                                                                                                                                                                                                                                                                                                                                                                                                                                                                                                                                                                                                                               |   |            |             |             |   |            |             |             |   |            |             |             |   |            |             |             |   |            |             |             |   |            |             |             |   |            |             |            |   |            |             |            |   |            |             |             |   |            |             |             |   |            |             |             |   |             |             |             |   |             |             |             |   |             |             |             |   |             |            |             |   |             |             |             |   |             |             |             |   |             |             |             |   |             |            |             |   |             |             |             |   |             |             |             |   |             |             |             |   |             |             |             |   |             |            |             |   |             |             |             |   |             |             |            |   |             |            |             |   |             |             |             |   |             |            |            |                                                                                                                                                                                                                                                                                                                                                                                                                                                                                                                                                                                                                                                                                                                                                                                                                                                                                                                                                                                                                                                                                                                                                                                                                                                                                                                                                                                                                                                                                                                                                                                                                                                                                                                                                                                                                                                                                                                                                                                                                                                                                                                                                                                                                                                                                                                                                                                                                                                                                                                        |            |            |            |             |            |            |            |                                                                                                                                                                                                                                                                                                                                                                                                                                                                                                                                                                                                                                                                                                                                                                                                                                                                                                                                                                                                                                                                                                                                                                                                                                                                                                                                                                                                                                                                                                                                                                                                                                                                                                                                                                                                                                                                                                                                                                                                                                                                                                                                                                                                                                                                                                                                                                                                                                                                                                                                                                                             |   |            |             |             |   |            |             |             |   |            |             |             |   |            |             |             |   |            |             |             |   |            |             |             |   |            |             |            |   |            |             |            |   |            |            |             |   |            |             |             |   |            |             |             |   |             |             |             |   |             |             |             |   |             |            |             |   |             |             |             |   |             |             |             |   |             |            |             |   |             |             |             |   |             |             |             |   |             |             |             |   |             |             |             |   |             |             |             |   |             |             |             |   |             |            |             |   |             |             |             |   |             |             |            |   |             |             |             |   |             |            |             |   |            |            |            |   |            |            |            |   |            |            |            |
| H                                                                                                                                                                                                                                                                                                                                                                                                                                                                                                                                                                                                                                                                                                                                                                                                                                                                                                                                                                                                                                                                                                                                                                                                                                                                                                                                                                                                                                                                                                                                                                                                                                                                                                                                                                                                                                                                                                                                                                                                                                                                                                                                                                                                                                                                                                                                               | -6.26230600 | -1.44238300                                                                        | 0.69460700                                                                           |             |   |            |            |             |   |            |             |             |   |            |             |             |   |            |             |             |   |            |             |             |   |            |            |             |   |            |             |             |   |            |             |            |   |            |             |             |   |            |            |             |   |            |             |             |   |            |             |             |   |             |             |             |   |             |             |             |   |             |             |            |   |             |             |             |   |             |             |             |   |             |             |             |   |             |             |             |   |             |             |            |   |             |             |             |   |             |            |             |   |             |             |             |   |             |            |             |   |             |            |             |   |             |             |             |                                                                                                                                                                                                                                                                                                                                                                                                                                                                                                                                                                                                                                                                                                                                                                                                                                                                                                                                                                                                                                                                                                                                                                                                                                                                                                                                                                                                                                                                                                                                                                                                                                                                                                                                                                                                                                                                                                                                                                                                                                                                                                                                                                                                                                                                                                                                                                                                                                                                                                                     |            |             |            |                                                                                                                                                                                                                                                                                                                                                                                                                                                                                                                                                                                                                                                                                                                                                                                                                                                                                                                                                                                                                                                                                                                                                                                                                                                                                                                                                                                                                                                                                                                                                                                                                                                                                                                                                                                                                                                                                                                                                                                                                                                                                                                                                                                                                                                                                                                                                                                                                                                                                                                                                                                               |   |            |             |             |   |            |             |             |   |            |             |             |   |            |             |             |   |            |             |             |   |            |             |             |   |            |             |            |   |            |             |            |   |            |             |             |   |            |             |             |   |            |             |             |   |             |             |             |   |             |             |             |   |             |             |             |   |             |            |             |   |             |             |             |   |             |             |             |   |             |             |             |   |             |            |             |   |             |             |             |   |             |             |             |   |             |             |             |   |             |             |             |   |             |            |             |   |             |             |             |   |             |             |            |   |             |            |             |   |             |             |             |   |             |            |            |                                                                                                                                                                                                                                                                                                                                                                                                                                                                                                                                                                                                                                                                                                                                                                                                                                                                                                                                                                                                                                                                                                                                                                                                                                                                                                                                                                                                                                                                                                                                                                                                                                                                                                                                                                                                                                                                                                                                                                                                                                                                                                                                                                                                                                                                                                                                                                                                                                                                                                                        |            |            |            |             |            |            |            |                                                                                                                                                                                                                                                                                                                                                                                                                                                                                                                                                                                                                                                                                                                                                                                                                                                                                                                                                                                                                                                                                                                                                                                                                                                                                                                                                                                                                                                                                                                                                                                                                                                                                                                                                                                                                                                                                                                                                                                                                                                                                                                                                                                                                                                                                                                                                                                                                                                                                                                                                                                             |   |            |             |             |   |            |             |             |   |            |             |             |   |            |             |             |   |            |             |             |   |            |             |             |   |            |             |            |   |            |             |            |   |            |            |             |   |            |             |             |   |            |             |             |   |             |             |             |   |             |             |             |   |             |            |             |   |             |             |             |   |             |             |             |   |             |            |             |   |             |             |             |   |             |             |             |   |             |             |             |   |             |             |             |   |             |             |             |   |             |             |             |   |             |            |             |   |             |             |             |   |             |             |            |   |             |             |             |   |             |            |             |   |            |            |            |   |            |            |            |   |            |            |            |
| C                                                                                                                                                                                                                                                                                                                                                                                                                                                                                                                                                                                                                                                                                                                                                                                                                                                                                                                                                                                                                                                                                                                                                                                                                                                                                                                                                                                                                                                                                                                                                                                                                                                                                                                                                                                                                                                                                                                                                                                                                                                                                                                                                                                                                                                                                                                                               | 1.05567300  | 0.31877700                                                                         | -0.75743300                                                                          |             |   |            |            |             |   |            |             |             |   |            |             |             |   |            |             |             |   |            |             |             |   |            |            |             |   |            |             |             |   |            |             |            |   |            |             |             |   |            |            |             |   |            |             |             |   |            |             |             |   |             |             |             |   |             |             |             |   |             |             |            |   |             |             |             |   |             |             |             |   |             |             |             |   |             |             |             |   |             |             |            |   |             |             |             |   |             |            |             |   |             |             |             |   |             |            |             |   |             |            |             |   |             |             |             |                                                                                                                                                                                                                                                                                                                                                                                                                                                                                                                                                                                                                                                                                                                                                                                                                                                                                                                                                                                                                                                                                                                                                                                                                                                                                                                                                                                                                                                                                                                                                                                                                                                                                                                                                                                                                                                                                                                                                                                                                                                                                                                                                                                                                                                                                                                                                                                                                                                                                                                     |            |             |            |                                                                                                                                                                                                                                                                                                                                                                                                                                                                                                                                                                                                                                                                                                                                                                                                                                                                                                                                                                                                                                                                                                                                                                                                                                                                                                                                                                                                                                                                                                                                                                                                                                                                                                                                                                                                                                                                                                                                                                                                                                                                                                                                                                                                                                                                                                                                                                                                                                                                                                                                                                                               |   |            |             |             |   |            |             |             |   |            |             |             |   |            |             |             |   |            |             |             |   |            |             |             |   |            |             |            |   |            |             |            |   |            |             |             |   |            |             |             |   |            |             |             |   |             |             |             |   |             |             |             |   |             |             |             |   |             |            |             |   |             |             |             |   |             |             |             |   |             |             |             |   |             |            |             |   |             |             |             |   |             |             |             |   |             |             |             |   |             |             |             |   |             |            |             |   |             |             |             |   |             |             |            |   |             |            |             |   |             |             |             |   |             |            |            |                                                                                                                                                                                                                                                                                                                                                                                                                                                                                                                                                                                                                                                                                                                                                                                                                                                                                                                                                                                                                                                                                                                                                                                                                                                                                                                                                                                                                                                                                                                                                                                                                                                                                                                                                                                                                                                                                                                                                                                                                                                                                                                                                                                                                                                                                                                                                                                                                                                                                                                        |            |            |            |             |            |            |            |                                                                                                                                                                                                                                                                                                                                                                                                                                                                                                                                                                                                                                                                                                                                                                                                                                                                                                                                                                                                                                                                                                                                                                                                                                                                                                                                                                                                                                                                                                                                                                                                                                                                                                                                                                                                                                                                                                                                                                                                                                                                                                                                                                                                                                                                                                                                                                                                                                                                                                                                                                                             |   |            |             |             |   |            |             |             |   |            |             |             |   |            |             |             |   |            |             |             |   |            |             |             |   |            |             |            |   |            |             |            |   |            |            |             |   |            |             |             |   |            |             |             |   |             |             |             |   |             |             |             |   |             |            |             |   |             |             |             |   |             |             |             |   |             |            |             |   |             |             |             |   |             |             |             |   |             |             |             |   |             |             |             |   |             |             |             |   |             |             |             |   |             |            |             |   |             |             |             |   |             |             |            |   |             |             |             |   |             |            |             |   |            |            |            |   |            |            |            |   |            |            |            |
| H                                                                                                                                                                                                                                                                                                                                                                                                                                                                                                                                                                                                                                                                                                                                                                                                                                                                                                                                                                                                                                                                                                                                                                                                                                                                                                                                                                                                                                                                                                                                                                                                                                                                                                                                                                                                                                                                                                                                                                                                                                                                                                                                                                                                                                                                                                                                               | 1.12709800  | 1.17345800                                                                         | -1.42190300                                                                          |             |   |            |            |             |   |            |             |             |   |            |             |             |   |            |             |             |   |            |             |             |   |            |            |             |   |            |             |             |   |            |             |            |   |            |             |             |   |            |            |             |   |            |             |             |   |            |             |             |   |             |             |             |   |             |             |             |   |             |             |            |   |             |             |             |   |             |             |             |   |             |             |             |   |             |             |             |   |             |             |            |   |             |             |             |   |             |            |             |   |             |             |             |   |             |            |             |   |             |            |             |   |             |             |             |                                                                                                                                                                                                                                                                                                                                                                                                                                                                                                                                                                                                                                                                                                                                                                                                                                                                                                                                                                                                                                                                                                                                                                                                                                                                                                                                                                                                                                                                                                                                                                                                                                                                                                                                                                                                                                                                                                                                                                                                                                                                                                                                                                                                                                                                                                                                                                                                                                                                                                                     |            |             |            |                                                                                                                                                                                                                                                                                                                                                                                                                                                                                                                                                                                                                                                                                                                                                                                                                                                                                                                                                                                                                                                                                                                                                                                                                                                                                                                                                                                                                                                                                                                                                                                                                                                                                                                                                                                                                                                                                                                                                                                                                                                                                                                                                                                                                                                                                                                                                                                                                                                                                                                                                                                               |   |            |             |             |   |            |             |             |   |            |             |             |   |            |             |             |   |            |             |             |   |            |             |             |   |            |             |            |   |            |             |            |   |            |             |             |   |            |             |             |   |            |             |             |   |             |             |             |   |             |             |             |   |             |             |             |   |             |            |             |   |             |             |             |   |             |             |             |   |             |             |             |   |             |            |             |   |             |             |             |   |             |             |             |   |             |             |             |   |             |             |             |   |             |            |             |   |             |             |             |   |             |             |            |   |             |            |             |   |             |             |             |   |             |            |            |                                                                                                                                                                                                                                                                                                                                                                                                                                                                                                                                                                                                                                                                                                                                                                                                                                                                                                                                                                                                                                                                                                                                                                                                                                                                                                                                                                                                                                                                                                                                                                                                                                                                                                                                                                                                                                                                                                                                                                                                                                                                                                                                                                                                                                                                                                                                                                                                                                                                                                                        |            |            |            |             |            |            |            |                                                                                                                                                                                                                                                                                                                                                                                                                                                                                                                                                                                                                                                                                                                                                                                                                                                                                                                                                                                                                                                                                                                                                                                                                                                                                                                                                                                                                                                                                                                                                                                                                                                                                                                                                                                                                                                                                                                                                                                                                                                                                                                                                                                                                                                                                                                                                                                                                                                                                                                                                                                             |   |            |             |             |   |            |             |             |   |            |             |             |   |            |             |             |   |            |             |             |   |            |             |             |   |            |             |            |   |            |             |            |   |            |            |             |   |            |             |             |   |            |             |             |   |             |             |             |   |             |             |             |   |             |            |             |   |             |             |             |   |             |             |             |   |             |            |             |   |             |             |             |   |             |             |             |   |             |             |             |   |             |             |             |   |             |             |             |   |             |             |             |   |             |            |             |   |             |             |             |   |             |             |            |   |             |             |             |   |             |            |             |   |            |            |            |   |            |            |            |   |            |            |            |
| C                                                                                                                                                                                                                                                                                                                                                                                                                                                                                                                                                                                                                                                                                                                                                                                                                                                                                                                                                                                                                                                                                                                                                                                                                                                                                                                                                                                                                                                                                                                                                                                                                                                                                                                                                                                                                                                                                                                                                                                                                                                                                                                                                                                                                                                                                                                                               | 1.60372700  | 2.12739100                                                                         | 1.10068800                                                                           |             |   |            |            |             |   |            |             |             |   |            |             |             |   |            |             |             |   |            |             |             |   |            |            |             |   |            |             |             |   |            |             |            |   |            |             |             |   |            |            |             |   |            |             |             |   |            |             |             |   |             |             |             |   |             |             |             |   |             |             |            |   |             |             |             |   |             |             |             |   |             |             |             |   |             |             |             |   |             |             |            |   |             |             |             |   |             |            |             |   |             |             |             |   |             |            |             |   |             |            |             |   |             |             |             |                                                                                                                                                                                                                                                                                                                                                                                                                                                                                                                                                                                                                                                                                                                                                                                                                                                                                                                                                                                                                                                                                                                                                                                                                                                                                                                                                                                                                                                                                                                                                                                                                                                                                                                                                                                                                                                                                                                                                                                                                                                                                                                                                                                                                                                                                                                                                                                                                                                                                                                     |            |             |            |                                                                                                                                                                                                                                                                                                                                                                                                                                                                                                                                                                                                                                                                                                                                                                                                                                                                                                                                                                                                                                                                                                                                                                                                                                                                                                                                                                                                                                                                                                                                                                                                                                                                                                                                                                                                                                                                                                                                                                                                                                                                                                                                                                                                                                                                                                                                                                                                                                                                                                                                                                                               |   |            |             |             |   |            |             |             |   |            |             |             |   |            |             |             |   |            |             |             |   |            |             |             |   |            |             |            |   |            |             |            |   |            |             |             |   |            |             |             |   |            |             |             |   |             |             |             |   |             |             |             |   |             |             |             |   |             |            |             |   |             |             |             |   |             |             |             |   |             |             |             |   |             |            |             |   |             |             |             |   |             |             |             |   |             |             |             |   |             |             |             |   |             |            |             |   |             |             |             |   |             |             |            |   |             |            |             |   |             |             |             |   |             |            |            |                                                                                                                                                                                                                                                                                                                                                                                                                                                                                                                                                                                                                                                                                                                                                                                                                                                                                                                                                                                                                                                                                                                                                                                                                                                                                                                                                                                                                                                                                                                                                                                                                                                                                                                                                                                                                                                                                                                                                                                                                                                                                                                                                                                                                                                                                                                                                                                                                                                                                                                        |            |            |            |             |            |            |            |                                                                                                                                                                                                                                                                                                                                                                                                                                                                                                                                                                                                                                                                                                                                                                                                                                                                                                                                                                                                                                                                                                                                                                                                                                                                                                                                                                                                                                                                                                                                                                                                                                                                                                                                                                                                                                                                                                                                                                                                                                                                                                                                                                                                                                                                                                                                                                                                                                                                                                                                                                                             |   |            |             |             |   |            |             |             |   |            |             |             |   |            |             |             |   |            |             |             |   |            |             |             |   |            |             |            |   |            |             |            |   |            |            |             |   |            |             |             |   |            |             |             |   |             |             |             |   |             |             |             |   |             |            |             |   |             |             |             |   |             |             |             |   |             |            |             |   |             |             |             |   |             |             |             |   |             |             |             |   |             |             |             |   |             |             |             |   |             |             |             |   |             |            |             |   |             |             |             |   |             |             |            |   |             |             |             |   |             |            |             |   |            |            |            |   |            |            |            |   |            |            |            |
| O                                                                                                                                                                                                                                                                                                                                                                                                                                                                                                                                                                                                                                                                                                                                                                                                                                                                                                                                                                                                                                                                                                                                                                                                                                                                                                                                                                                                                                                                                                                                                                                                                                                                                                                                                                                                                                                                                                                                                                                                                                                                                                                                                                                                                                                                                                                                               | 1.03031000  | 1.64322100                                                                         | 1.99266100                                                                           |             |   |            |            |             |   |            |             |             |   |            |             |             |   |            |             |             |   |            |             |             |   |            |            |             |   |            |             |             |   |            |             |            |   |            |             |             |   |            |            |             |   |            |             |             |   |            |             |             |   |             |             |             |   |             |             |             |   |             |             |            |   |             |             |             |   |             |             |             |   |             |             |             |   |             |             |             |   |             |             |            |   |             |             |             |   |             |            |             |   |             |             |             |   |             |            |             |   |             |            |             |   |             |             |             |                                                                                                                                                                                                                                                                                                                                                                                                                                                                                                                                                                                                                                                                                                                                                                                                                                                                                                                                                                                                                                                                                                                                                                                                                                                                                                                                                                                                                                                                                                                                                                                                                                                                                                                                                                                                                                                                                                                                                                                                                                                                                                                                                                                                                                                                                                                                                                                                                                                                                                                     |            |             |            |                                                                                                                                                                                                                                                                                                                                                                                                                                                                                                                                                                                                                                                                                                                                                                                                                                                                                                                                                                                                                                                                                                                                                                                                                                                                                                                                                                                                                                                                                                                                                                                                                                                                                                                                                                                                                                                                                                                                                                                                                                                                                                                                                                                                                                                                                                                                                                                                                                                                                                                                                                                               |   |            |             |             |   |            |             |             |   |            |             |             |   |            |             |             |   |            |             |             |   |            |             |             |   |            |             |            |   |            |             |            |   |            |             |             |   |            |             |             |   |            |             |             |   |             |             |             |   |             |             |             |   |             |             |             |   |             |            |             |   |             |             |             |   |             |             |             |   |             |             |             |   |             |            |             |   |             |             |             |   |             |             |             |   |             |             |             |   |             |             |             |   |             |            |             |   |             |             |             |   |             |             |            |   |             |            |             |   |             |             |             |   |             |            |            |                                                                                                                                                                                                                                                                                                                                                                                                                                                                                                                                                                                                                                                                                                                                                                                                                                                                                                                                                                                                                                                                                                                                                                                                                                                                                                                                                                                                                                                                                                                                                                                                                                                                                                                                                                                                                                                                                                                                                                                                                                                                                                                                                                                                                                                                                                                                                                                                                                                                                                                        |            |            |            |             |            |            |            |                                                                                                                                                                                                                                                                                                                                                                                                                                                                                                                                                                                                                                                                                                                                                                                                                                                                                                                                                                                                                                                                                                                                                                                                                                                                                                                                                                                                                                                                                                                                                                                                                                                                                                                                                                                                                                                                                                                                                                                                                                                                                                                                                                                                                                                                                                                                                                                                                                                                                                                                                                                             |   |            |             |             |   |            |             |             |   |            |             |             |   |            |             |             |   |            |             |             |   |            |             |             |   |            |             |            |   |            |             |            |   |            |            |             |   |            |             |             |   |            |             |             |   |             |             |             |   |             |             |             |   |             |            |             |   |             |             |             |   |             |             |             |   |             |            |             |   |             |             |             |   |             |             |             |   |             |             |             |   |             |             |             |   |             |             |             |   |             |             |             |   |             |            |             |   |             |             |             |   |             |             |            |   |             |             |             |   |             |            |             |   |            |            |            |   |            |            |            |   |            |            |            |
| O                                                                                                                                                                                                                                                                                                                                                                                                                                                                                                                                                                                                                                                                                                                                                                                                                                                                                                                                                                                                                                                                                                                                                                                                                                                                                                                                                                                                                                                                                                                                                                                                                                                                                                                                                                                                                                                                                                                                                                                                                                                                                                                                                                                                                                                                                                                                               | 2.24086700  | 2.83830100                                                                         | 0.42968800                                                                           |             |   |            |            |             |   |            |             |             |   |            |             |             |   |            |             |             |   |            |             |             |   |            |            |             |   |            |             |             |   |            |             |            |   |            |             |             |   |            |            |             |   |            |             |             |   |            |             |             |   |             |             |             |   |             |             |             |   |             |             |            |   |             |             |             |   |             |             |             |   |             |             |             |   |             |             |             |   |             |             |            |   |             |             |             |   |             |            |             |   |             |             |             |   |             |            |             |   |             |            |             |   |             |             |             |                                                                                                                                                                                                                                                                                                                                                                                                                                                                                                                                                                                                                                                                                                                                                                                                                                                                                                                                                                                                                                                                                                                                                                                                                                                                                                                                                                                                                                                                                                                                                                                                                                                                                                                                                                                                                                                                                                                                                                                                                                                                                                                                                                                                                                                                                                                                                                                                                                                                                                                     |            |             |            |                                                                                                                                                                                                                                                                                                                                                                                                                                                                                                                                                                                                                                                                                                                                                                                                                                                                                                                                                                                                                                                                                                                                                                                                                                                                                                                                                                                                                                                                                                                                                                                                                                                                                                                                                                                                                                                                                                                                                                                                                                                                                                                                                                                                                                                                                                                                                                                                                                                                                                                                                                                               |   |            |             |             |   |            |             |             |   |            |             |             |   |            |             |             |   |            |             |             |   |            |             |             |   |            |             |            |   |            |             |            |   |            |             |             |   |            |             |             |   |            |             |             |   |             |             |             |   |             |             |             |   |             |             |             |   |             |            |             |   |             |             |             |   |             |             |             |   |             |             |             |   |             |            |             |   |             |             |             |   |             |             |             |   |             |             |             |   |             |             |             |   |             |            |             |   |             |             |             |   |             |             |            |   |             |            |             |   |             |             |             |   |             |            |            |                                                                                                                                                                                                                                                                                                                                                                                                                                                                                                                                                                                                                                                                                                                                                                                                                                                                                                                                                                                                                                                                                                                                                                                                                                                                                                                                                                                                                                                                                                                                                                                                                                                                                                                                                                                                                                                                                                                                                                                                                                                                                                                                                                                                                                                                                                                                                                                                                                                                                                                        |            |            |            |             |            |            |            |                                                                                                                                                                                                                                                                                                                                                                                                                                                                                                                                                                                                                                                                                                                                                                                                                                                                                                                                                                                                                                                                                                                                                                                                                                                                                                                                                                                                                                                                                                                                                                                                                                                                                                                                                                                                                                                                                                                                                                                                                                                                                                                                                                                                                                                                                                                                                                                                                                                                                                                                                                                             |   |            |             |             |   |            |             |             |   |            |             |             |   |            |             |             |   |            |             |             |   |            |             |             |   |            |             |            |   |            |             |            |   |            |            |             |   |            |             |             |   |            |             |             |   |             |             |             |   |             |             |             |   |             |            |             |   |             |             |             |   |             |             |             |   |             |            |             |   |             |             |             |   |             |             |             |   |             |             |             |   |             |             |             |   |             |             |             |   |             |             |             |   |             |            |             |   |             |             |             |   |             |             |            |   |             |             |             |   |             |            |             |   |            |            |            |   |            |            |            |   |            |            |            |
| <p>28</p>                                                                                                                                                                                                                                                                                                                                                                                                                                                                                                                                                                                                                                                                                                                                                                                                                                                                                                                                                                                                                                                                                                                                                                                                                                                                                                                                                                                                                                                                                                                                                                                                                                                                                                                                                                                                                                                                                                                                                                                                                                                                                                                                                                                                                                                     |             |  |  |             |   |            |            |             |   |            |             |             |   |            |             |             |   |            |             |             |   |            |             |             |   |            |            |             |   |            |             |             |   |            |             |            |   |            |             |             |   |            |            |             |   |            |             |             |   |            |             |             |   |             |             |             |   |             |             |             |   |             |             |            |   |             |             |             |   |             |             |             |   |             |             |             |   |             |             |             |   |             |             |            |   |             |             |             |   |             |            |             |   |             |             |             |   |             |            |             |   |             |            |             |   |             |             |             |                                                                                                                                                                                                                                                                                                                                                                                                                                                                                                                                                                                                                                                                                                                                                                                                                                                                                                                                                                                                                                                                                                                                                                                                                                                                                                                                                                                                                                                                                                                                                                                                                                                                                                                                                                                                                                                                                                                                                                                                                                                                                                                                                                                                                                                                                                                                                                                                                                                                                                                     |            |             |            |                                                                                                                                                                                                                                                                                                                                                                                                                                                                                                                                                                                                                                                                                                                                                                                                                                                                                                                                                                                                                                                                                                                                                                                                                                                                                                                                                                                                                                                                                                                                                                                                                                                                                                                                                                                                                                                                                                                                                                                                                                                                                                                                                                                                                                                                                                                                                                                                                                                                                                                                                                                               |   |            |             |             |   |            |             |             |   |            |             |             |   |            |             |             |   |            |             |             |   |            |             |             |   |            |             |            |   |            |             |            |   |            |             |             |   |            |             |             |   |            |             |             |   |             |             |             |   |             |             |             |   |             |             |             |   |             |            |             |   |             |             |             |   |             |             |             |   |             |             |             |   |             |            |             |   |             |             |             |   |             |             |             |   |             |             |             |   |             |             |             |   |             |            |             |   |             |             |             |   |             |             |            |   |             |            |             |   |             |             |             |   |             |            |            |                                                                                                                                                                                                                                                                                                                                                                                                                                                                                                                                                                                                                                                                                                                                                                                                                                                                                                                                                                                                                                                                                                                                                                                                                                                                                                                                                                                                                                                                                                                                                                                                                                                                                                                                                                                                                                                                                                                                                                                                                                                                                                                                                                                                                                                                                                                                                                                                                                                                                                                        |            |            |            |             |            |            |            |                                                                                                                                                                                                                                                                                                                                                                                                                                                                                                                                                                                                                                                                                                                                                                                                                                                                                                                                                                                                                                                                                                                                                                                                                                                                                                                                                                                                                                                                                                                                                                                                                                                                                                                                                                                                                                                                                                                                                                                                                                                                                                                                                                                                                                                                                                                                                                                                                                                                                                                                                                                             |   |            |             |             |   |            |             |             |   |            |             |             |   |            |             |             |   |            |             |             |   |            |             |             |   |            |             |            |   |            |             |            |   |            |            |             |   |            |             |             |   |            |             |             |   |             |             |             |   |             |             |             |   |             |            |             |   |             |             |             |   |             |             |             |   |             |            |             |   |             |             |             |   |             |             |             |   |             |             |             |   |             |             |             |   |             |             |             |   |             |             |             |   |             |            |             |   |             |             |             |   |             |             |            |   |             |             |             |   |             |            |             |   |            |            |            |   |            |            |            |   |            |            |            |
| <p>-2 1</p> <table border="1"> <tbody> <tr><td>C</td><td>3.58026700</td><td>0.48491300</td><td>0.09211000</td></tr> <tr><td>C</td><td>2.19486300</td><td>0.48843800</td><td>0.00012000</td></tr> <tr><td>C</td><td>1.53193300</td><td>-0.74918500</td><td>-0.05739700</td></tr> <tr><td>C</td><td>2.25496700</td><td>-1.93779200</td><td>-0.02198700</td></tr> <tr><td>C</td><td>3.64466400</td><td>-1.91133100</td><td>0.06942800</td></tr> <tr><td>C</td><td>4.31309700</td><td>-0.70124000</td><td>0.12897100</td></tr> <tr><td>H</td><td>4.07666300</td><td>1.44669900</td><td>0.13107400</td></tr> <tr><td>H</td><td>1.71776900</td><td>-2.87746300</td><td>-0.06944400</td></tr> <tr><td>H</td><td>4.19477200</td><td>-2.84461200</td><td>0.09556200</td></tr> <tr><td>H</td><td>5.39361300</td><td>-0.67407100</td><td>0.20103000</td></tr> <tr><td>C</td><td>1.40817500</td><td>1.75510200</td><td>-0.04747600</td></tr> <tr><td>O</td><td>2.04195400</td><td>2.87793000</td><td>-0.05355500</td></tr> <tr><td>O</td><td>0.19712700</td><td>-0.85287000</td><td>-0.16591600</td></tr> <tr><td>C</td><td>-1.97213200</td><td>0.04599700</td><td>-0.01594500</td></tr> <tr><td>C</td><td>-2.53501100</td><td>-1.29901900</td><td>-0.05245300</td></tr> <tr><td>C</td><td>-2.97541600</td><td>1.10145400</td><td>0.07647200</td></tr> <tr><td>C</td><td>-3.88971000</td><td>-1.52245300</td><td>-0.01080100</td></tr> <tr><td>H</td><td>-1.86194100</td><td>-2.14480200</td><td>-0.11482000</td></tr> <tr><td>C</td><td>-4.31911000</td><td>0.82777200</td><td>0.11484500</td></tr> <tr><td>H</td><td>-2.65468300</td><td>2.13579500</td><td>0.12126500</td></tr> <tr><td>H</td><td>-4.83217200</td><td>-0.48243700</td><td>0.07202200</td></tr> <tr><td>H</td><td>-4.23971200</td><td>-2.55192600</td><td>-0.04255100</td></tr> <tr><td>H</td><td>-5.00980900</td><td>1.66506600</td><td>0.18430800</td></tr> <tr><td>H</td><td>-5.89594300</td><td>-0.67841000</td><td>0.10524700</td></tr> <tr><td>C</td><td>0.04733500</td><td>1.57596900</td><td>-0.07373100</td></tr> <tr><td>H</td><td>-0.57585800</td><td>2.46333400</td><td>-0.09077000</td></tr> <tr><td>C</td><td>-0.62800200</td><td>0.30046300</td><td>-0.06836800</td></tr> </tbody> </table>                                                                                | C           | 3.58026700                                                                         | 0.48491300                                                                           | 0.09211000  | C | 2.19486300 | 0.48843800 | 0.00012000  | C | 1.53193300 | -0.74918500 | -0.05739700 | C | 2.25496700 | -1.93779200 | -0.02198700 | C | 3.64466400 | -1.91133100 | 0.06942800  | C | 4.31309700 | -0.70124000 | 0.12897100  | H | 4.07666300 | 1.44669900 | 0.13107400  | H | 1.71776900 | -2.87746300 | -0.06944400 | H | 4.19477200 | -2.84461200 | 0.09556200 | H | 5.39361300 | -0.67407100 | 0.20103000  | C | 1.40817500 | 1.75510200 | -0.04747600 | O | 2.04195400 | 2.87793000  | -0.05355500 | O | 0.19712700 | -0.85287000 | -0.16591600 | C | -1.97213200 | 0.04599700  | -0.01594500 | C | -2.53501100 | -1.29901900 | -0.05245300 | C | -2.97541600 | 1.10145400  | 0.07647200 | C | -3.88971000 | -1.52245300 | -0.01080100 | H | -1.86194100 | -2.14480200 | -0.11482000 | C | -4.31911000 | 0.82777200  | 0.11484500  | H | -2.65468300 | 2.13579500  | 0.12126500  | H | -4.83217200 | -0.48243700 | 0.07202200 | H | -4.23971200 | -2.55192600 | -0.04255100 | H | -5.00980900 | 1.66506600 | 0.18430800  | H | -5.89594300 | -0.67841000 | 0.10524700  | C | 0.04733500  | 1.57596900 | -0.07373100 | H | -0.57585800 | 2.46333400 | -0.09077000 | C | -0.62800200 | 0.30046300  | -0.06836800 | <p>-2 1</p> <table border="1"> <tbody> <tr><td>C</td><td>3.60507100</td><td>0.54267100</td><td>-0.48046900</td></tr> <tr><td>C</td><td>2.21807300</td><td>0.46617200</td><td>-0.44080100</td></tr> <tr><td>C</td><td>1.63077500</td><td>-0.77562200</td><td>-0.17683700</td></tr> <tr><td>C</td><td>2.41639900</td><td>-1.90728600</td><td>0.01189300</td></tr> <tr><td>C</td><td>3.79861300</td><td>-1.80484400</td><td>-0.03309300</td></tr> <tr><td>C</td><td>4.40019800</td><td>-0.57520600</td><td>-0.27062400</td></tr> <tr><td>H</td><td>4.04677300</td><td>1.50726500</td><td>-0.69925600</td></tr> <tr><td>H</td><td>1.93095000</td><td>-2.85680000</td><td>0.20072300</td></tr> <tr><td>H</td><td>4.40540600</td><td>-2.68847800</td><td>0.12437000</td></tr> <tr><td>H</td><td>5.47961600</td><td>-0.49237600</td><td>-0.30134000</td></tr> <tr><td>C</td><td>1.34442100</td><td>1.64288300</td><td>-0.75855500</td></tr> <tr><td>O</td><td>1.88914700</td><td>2.68534800</td><td>-1.26454700</td></tr> <tr><td>O</td><td>0.29154400</td><td>-0.93188700</td><td>-0.16057300</td></tr> <tr><td>C</td><td>-1.92336800</td><td>-0.09745700</td><td>-0.16468400</td></tr> <tr><td>C</td><td>-2.29025300</td><td>-1.33037100</td><td>-0.69425400</td></tr> <tr><td>C</td><td>-2.91895500</td><td>0.86103200</td><td>0.02761700</td></tr> <tr><td>C</td><td>-3.61186900</td><td>-1.59526400</td><td>-1.03331500</td></tr> <tr><td>H</td><td>-1.53494900</td><td>-2.08748400</td><td>-0.84818000</td></tr> <tr><td>C</td><td>-4.23680900</td><td>0.59708600</td><td>-0.30764900</td></tr> <tr><td>H</td><td>-2.65320800</td><td>1.81554700</td><td>0.46145000</td></tr> <tr><td>C</td><td>-4.59203400</td><td>-0.63456500</td><td>-0.84345900</td></tr> <tr><td>H</td><td>-3.87269400</td><td>-2.56146500</td><td>-1.44860800</td></tr> <tr><td>H</td><td>-4.99190200</td><td>1.35769600</td><td>-0.14908300</td></tr> <tr><td>H</td><td>-5.62174200</td><td>-0.84084300</td><td>-1.10790000</td></tr> <tr><td>O</td><td>0.01746600</td><td>1.44533200</td><td>-0.49554200</td></tr> <tr><td>H</td><td>-0.69052100</td><td>2.24342200</td><td>-0.68120500</td></tr> <tr><td>C</td><td>-0.48390500</td><td>0.21615900</td><td>0.21754500</td></tr> <tr><td>C</td><td>-0.45594800</td><td>0.34291900</td><td>1.80112600</td></tr> <tr><td>O</td><td>-0.13078900</td><td>-0.67277300</td><td>2.44753500</td></tr> <tr><td>O</td><td>-0.80052000</td><td>1.44952200</td><td>2.26453900</td></tr> </tbody> </table> | C          | 3.60507100  | 0.54267100 | -0.48046900                                                                                                                                                                                                                                                                                                                                                                                                                                                                                                                                                                                                                                                                                                                                                                                                                                                                                                                                                                                                                                                                                                                                                                                                                                                                                                                                                                                                                                                                                                                                                                                                                                                                                                                                                                                                                                                                                                                                                                                                                                                                                                                                                                                                                                                                                                                                                                                                                                                                                                                                                                                   | C | 2.21807300 | 0.46617200  | -0.44080100 | C | 1.63077500 | -0.77562200 | -0.17683700 | C | 2.41639900 | -1.90728600 | 0.01189300  | C | 3.79861300 | -1.80484400 | -0.03309300 | C | 4.40019800 | -0.57520600 | -0.27062400 | H | 4.04677300 | 1.50726500  | -0.69925600 | H | 1.93095000 | -2.85680000 | 0.20072300 | H | 4.40540600 | -2.68847800 | 0.12437000 | H | 5.47961600 | -0.49237600 | -0.30134000 | C | 1.34442100 | 1.64288300  | -0.75855500 | O | 1.88914700 | 2.68534800  | -1.26454700 | O | 0.29154400  | -0.93188700 | -0.16057300 | C | -1.92336800 | -0.09745700 | -0.16468400 | C | -2.29025300 | -1.33037100 | -0.69425400 | C | -2.91895500 | 0.86103200 | 0.02761700  | C | -3.61186900 | -1.59526400 | -1.03331500 | H | -1.53494900 | -2.08748400 | -0.84818000 | C | -4.23680900 | 0.59708600  | -0.30764900 | H | -2.65320800 | 1.81554700 | 0.46145000  | C | -4.59203400 | -0.63456500 | -0.84345900 | H | -3.87269400 | -2.56146500 | -1.44860800 | H | -4.99190200 | 1.35769600  | -0.14908300 | H | -5.62174200 | -0.84084300 | -1.10790000 | O | 0.01746600  | 1.44533200 | -0.49554200 | H | -0.69052100 | 2.24342200  | -0.68120500 | C | -0.48390500 | 0.21615900  | 0.21754500 | C | -0.45594800 | 0.34291900 | 1.80112600  | O | -0.13078900 | -0.67277300 | 2.44753500  | O | -0.80052000 | 1.44952200 | 2.26453900 | <p>-2 1</p> <table border="1"> <tbody> <tr><td>C</td><td>3.69888000</td><td>0.50395800</td><td>-0.13667000</td></tr> <tr><td>C</td><td>2.32551300</td><td>0.49268000</td><td>-0.34421500</td></tr> <tr><td>C</td><td>1.67855200</td><td>-0.75087700</td><td>-0.42202300</td></tr> <tr><td>C</td><td>2.40149500</td><td>-1.93230500</td><td>-0.29328000</td></tr> <tr><td>C</td><td>3.77656600</td><td>-1.89164200</td><td>-0.08556600</td></tr> <tr><td>C</td><td>4.43081200</td><td>-0.67344700</td><td>-0.00296500</td></tr> <tr><td>H</td><td>4.18627100</td><td>1.47025600</td><td>-0.09274400</td></tr> <tr><td>H</td><td>1.87514000</td><td>-2.87688800</td><td>-0.35950500</td></tr> <tr><td>H</td><td>4.32861500</td><td>-2.81866200</td><td>0.01463000</td></tr> <tr><td>H</td><td>5.50117800</td><td>-0.63625300</td><td>0.15930000</td></tr> <tr><td>C</td><td>1.53933800</td><td>1.75138900</td><td>-0.51277900</td></tr> <tr><td>O</td><td>2.17084300</td><td>2.87246400</td><td>-0.56652000</td></tr> <tr><td>O</td><td>0.35992000</td><td>-0.85985000</td><td>-0.66203900</td></tr> <tr><td>C</td><td>-1.82556700</td><td>0.00326400</td><td>-0.51778400</td></tr> <tr><td>C</td><td>-2.36023500</td><td>-1.33982000</td><td>-0.62213100</td></tr> <tr><td>C</td><td>-2.83318500</td><td>1.04461100</td><td>-0.47841000</td></tr> <tr><td>C</td><td>-3.71351400</td><td>-1.58659900</td><td>-0.60924900</td></tr> <tr><td>H</td><td>-1.67157500</td><td>-2.17154900</td><td>-0.69342500</td></tr> <tr><td>C</td><td>-4.17625100</td><td>0.75541000</td><td>-0.46874300</td></tr> <tr><td>H</td><td>-2.52336100</td><td>2.08128200</td><td>-0.42795700</td></tr> <tr><td>C</td><td>-4.66576600</td><td>-0.55953600</td><td>-0.52028100</td></tr> <tr><td>H</td><td>-4.04968300</td><td>-2.61733600</td><td>-0.67812000</td></tr> <tr><td>H</td><td>-4.88004500</td><td>1.58281100</td><td>-0.42502700</td></tr> <tr><td>H</td><td>-5.72753800</td><td>-0.76934100</td><td>-0.51856600</td></tr> <tr><td>C</td><td>0.18199500</td><td>1.56189600</td><td>-0.58117500</td></tr> <tr><td>H</td><td>-0.45015600</td><td>2.43940300</td><td>-0.65981500</td></tr> <tr><td>C</td><td>-0.47223500</td><td>0.27444300</td><td>-0.48230000</td></tr> <tr><td>C</td><td>-0.76509100</td><td>0.11104600</td><td>2.16378400</td></tr> <tr><td>O</td><td>-0.31878100</td><td>-0.96392600</td><td>2.23160300</td></tr> <tr><td>O</td><td>-1.20156800</td><td>1.16678900</td><td>2.39252400</td></tr> </tbody> </table> | C          | 3.69888000 | 0.50395800 | -0.13667000 | C          | 2.32551300 | 0.49268000 | -0.34421500                                                                                                                                                                                                                                                                                                                                                                                                                                                                                                                                                                                                                                                                                                                                                                                                                                                                                                                                                                                                                                                                                                                                                                                                                                                                                                                                                                                                                                                                                                                                                                                                                                                                                                                                                                                                                                                                                                                                                                                                                                                                                                                                                                                                                                                                                                                                                                                                                                                                                                                                                                                 | C | 1.67855200 | -0.75087700 | -0.42202300 | C | 2.40149500 | -1.93230500 | -0.29328000 | C | 3.77656600 | -1.89164200 | -0.08556600 | C | 4.43081200 | -0.67344700 | -0.00296500 | H | 4.18627100 | 1.47025600  | -0.09274400 | H | 1.87514000 | -2.87688800 | -0.35950500 | H | 4.32861500 | -2.81866200 | 0.01463000 | H | 5.50117800 | -0.63625300 | 0.15930000 | C | 1.53933800 | 1.75138900 | -0.51277900 | O | 2.17084300 | 2.87246400  | -0.56652000 | O | 0.35992000 | -0.85985000 | -0.66203900 | C | -1.82556700 | 0.00326400  | -0.51778400 | C | -2.36023500 | -1.33982000 | -0.62213100 | C | -2.83318500 | 1.04461100 | -0.47841000 | C | -3.71351400 | -1.58659900 | -0.60924900 | H | -1.67157500 | -2.17154900 | -0.69342500 | C | -4.17625100 | 0.75541000 | -0.46874300 | H | -2.52336100 | 2.08128200  | -0.42795700 | C | -4.66576600 | -0.55953600 | -0.52028100 | H | -4.04968300 | -2.61733600 | -0.67812000 | H | -4.88004500 | 1.58281100  | -0.42502700 | H | -5.72753800 | -0.76934100 | -0.51856600 | C | 0.18199500  | 1.56189600  | -0.58117500 | H | -0.45015600 | 2.43940300 | -0.65981500 | C | -0.47223500 | 0.27444300  | -0.48230000 | C | -0.76509100 | 0.11104600  | 2.16378400 | O | -0.31878100 | -0.96392600 | 2.23160300  | O | -1.20156800 | 1.16678900 | 2.39252400  |   |            |            |            |   |            |            |            |   |            |            |            |
| C                                                                                                                                                                                                                                                                                                                                                                                                                                                                                                                                                                                                                                                                                                                                                                                                                                                                                                                                                                                                                                                                                                                                                                                                                                                                                                                                                                                                                                                                                                                                                                                                                                                                                                                                                                                                                                                                                                                                                                                                                                                                                                                                                                                                                                                                                                                                               | 3.58026700  | 0.48491300                                                                         | 0.09211000                                                                           |             |   |            |            |             |   |            |             |             |   |            |             |             |   |            |             |             |   |            |             |             |   |            |            |             |   |            |             |             |   |            |             |            |   |            |             |             |   |            |            |             |   |            |             |             |   |            |             |             |   |             |             |             |   |             |             |             |   |             |             |            |   |             |             |             |   |             |             |             |   |             |             |             |   |             |             |             |   |             |             |            |   |             |             |             |   |             |            |             |   |             |             |             |   |             |            |             |   |             |            |             |   |             |             |             |                                                                                                                                                                                                                                                                                                                                                                                                                                                                                                                                                                                                                                                                                                                                                                                                                                                                                                                                                                                                                                                                                                                                                                                                                                                                                                                                                                                                                                                                                                                                                                                                                                                                                                                                                                                                                                                                                                                                                                                                                                                                                                                                                                                                                                                                                                                                                                                                                                                                                                                     |            |             |            |                                                                                                                                                                                                                                                                                                                                                                                                                                                                                                                                                                                                                                                                                                                                                                                                                                                                                                                                                                                                                                                                                                                                                                                                                                                                                                                                                                                                                                                                                                                                                                                                                                                                                                                                                                                                                                                                                                                                                                                                                                                                                                                                                                                                                                                                                                                                                                                                                                                                                                                                                                                               |   |            |             |             |   |            |             |             |   |            |             |             |   |            |             |             |   |            |             |             |   |            |             |             |   |            |             |            |   |            |             |            |   |            |             |             |   |            |             |             |   |            |             |             |   |             |             |             |   |             |             |             |   |             |             |             |   |             |            |             |   |             |             |             |   |             |             |             |   |             |             |             |   |             |            |             |   |             |             |             |   |             |             |             |   |             |             |             |   |             |             |             |   |             |            |             |   |             |             |             |   |             |             |            |   |             |            |             |   |             |             |             |   |             |            |            |                                                                                                                                                                                                                                                                                                                                                                                                                                                                                                                                                                                                                                                                                                                                                                                                                                                                                                                                                                                                                                                                                                                                                                                                                                                                                                                                                                                                                                                                                                                                                                                                                                                                                                                                                                                                                                                                                                                                                                                                                                                                                                                                                                                                                                                                                                                                                                                                                                                                                                                        |            |            |            |             |            |            |            |                                                                                                                                                                                                                                                                                                                                                                                                                                                                                                                                                                                                                                                                                                                                                                                                                                                                                                                                                                                                                                                                                                                                                                                                                                                                                                                                                                                                                                                                                                                                                                                                                                                                                                                                                                                                                                                                                                                                                                                                                                                                                                                                                                                                                                                                                                                                                                                                                                                                                                                                                                                             |   |            |             |             |   |            |             |             |   |            |             |             |   |            |             |             |   |            |             |             |   |            |             |             |   |            |             |            |   |            |             |            |   |            |            |             |   |            |             |             |   |            |             |             |   |             |             |             |   |             |             |             |   |             |            |             |   |             |             |             |   |             |             |             |   |             |            |             |   |             |             |             |   |             |             |             |   |             |             |             |   |             |             |             |   |             |             |             |   |             |             |             |   |             |            |             |   |             |             |             |   |             |             |            |   |             |             |             |   |             |            |             |   |            |            |            |   |            |            |            |   |            |            |            |
| C                                                                                                                                                                                                                                                                                                                                                                                                                                                                                                                                                                                                                                                                                                                                                                                                                                                                                                                                                                                                                                                                                                                                                                                                                                                                                                                                                                                                                                                                                                                                                                                                                                                                                                                                                                                                                                                                                                                                                                                                                                                                                                                                                                                                                                                                                                                                               | 2.19486300  | 0.48843800                                                                         | 0.00012000                                                                           |             |   |            |            |             |   |            |             |             |   |            |             |             |   |            |             |             |   |            |             |             |   |            |            |             |   |            |             |             |   |            |             |            |   |            |             |             |   |            |            |             |   |            |             |             |   |            |             |             |   |             |             |             |   |             |             |             |   |             |             |            |   |             |             |             |   |             |             |             |   |             |             |             |   |             |             |             |   |             |             |            |   |             |             |             |   |             |            |             |   |             |             |             |   |             |            |             |   |             |            |             |   |             |             |             |                                                                                                                                                                                                                                                                                                                                                                                                                                                                                                                                                                                                                                                                                                                                                                                                                                                                                                                                                                                                                                                                                                                                                                                                                                                                                                                                                                                                                                                                                                                                                                                                                                                                                                                                                                                                                                                                                                                                                                                                                                                                                                                                                                                                                                                                                                                                                                                                                                                                                                                     |            |             |            |                                                                                                                                                                                                                                                                                                                                                                                                                                                                                                                                                                                                                                                                                                                                                                                                                                                                                                                                                                                                                                                                                                                                                                                                                                                                                                                                                                                                                                                                                                                                                                                                                                                                                                                                                                                                                                                                                                                                                                                                                                                                                                                                                                                                                                                                                                                                                                                                                                                                                                                                                                                               |   |            |             |             |   |            |             |             |   |            |             |             |   |            |             |             |   |            |             |             |   |            |             |             |   |            |             |            |   |            |             |            |   |            |             |             |   |            |             |             |   |            |             |             |   |             |             |             |   |             |             |             |   |             |             |             |   |             |            |             |   |             |             |             |   |             |             |             |   |             |             |             |   |             |            |             |   |             |             |             |   |             |             |             |   |             |             |             |   |             |             |             |   |             |            |             |   |             |             |             |   |             |             |            |   |             |            |             |   |             |             |             |   |             |            |            |                                                                                                                                                                                                                                                                                                                                                                                                                                                                                                                                                                                                                                                                                                                                                                                                                                                                                                                                                                                                                                                                                                                                                                                                                                                                                                                                                                                                                                                                                                                                                                                                                                                                                                                                                                                                                                                                                                                                                                                                                                                                                                                                                                                                                                                                                                                                                                                                                                                                                                                        |            |            |            |             |            |            |            |                                                                                                                                                                                                                                                                                                                                                                                                                                                                                                                                                                                                                                                                                                                                                                                                                                                                                                                                                                                                                                                                                                                                                                                                                                                                                                                                                                                                                                                                                                                                                                                                                                                                                                                                                                                                                                                                                                                                                                                                                                                                                                                                                                                                                                                                                                                                                                                                                                                                                                                                                                                             |   |            |             |             |   |            |             |             |   |            |             |             |   |            |             |             |   |            |             |             |   |            |             |             |   |            |             |            |   |            |             |            |   |            |            |             |   |            |             |             |   |            |             |             |   |             |             |             |   |             |             |             |   |             |            |             |   |             |             |             |   |             |             |             |   |             |            |             |   |             |             |             |   |             |             |             |   |             |             |             |   |             |             |             |   |             |             |             |   |             |             |             |   |             |            |             |   |             |             |             |   |             |             |            |   |             |             |             |   |             |            |             |   |            |            |            |   |            |            |            |   |            |            |            |
| C                                                                                                                                                                                                                                                                                                                                                                                                                                                                                                                                                                                                                                                                                                                                                                                                                                                                                                                                                                                                                                                                                                                                                                                                                                                                                                                                                                                                                                                                                                                                                                                                                                                                                                                                                                                                                                                                                                                                                                                                                                                                                                                                                                                                                                                                                                                                               | 1.53193300  | -0.74918500                                                                        | -0.05739700                                                                          |             |   |            |            |             |   |            |             |             |   |            |             |             |   |            |             |             |   |            |             |             |   |            |            |             |   |            |             |             |   |            |             |            |   |            |             |             |   |            |            |             |   |            |             |             |   |            |             |             |   |             |             |             |   |             |             |             |   |             |             |            |   |             |             |             |   |             |             |             |   |             |             |             |   |             |             |             |   |             |             |            |   |             |             |             |   |             |            |             |   |             |             |             |   |             |            |             |   |             |            |             |   |             |             |             |                                                                                                                                                                                                                                                                                                                                                                                                                                                                                                                                                                                                                                                                                                                                                                                                                                                                                                                                                                                                                                                                                                                                                                                                                                                                                                                                                                                                                                                                                                                                                                                                                                                                                                                                                                                                                                                                                                                                                                                                                                                                                                                                                                                                                                                                                                                                                                                                                                                                                                                     |            |             |            |                                                                                                                                                                                                                                                                                                                                                                                                                                                                                                                                                                                                                                                                                                                                                                                                                                                                                                                                                                                                                                                                                                                                                                                                                                                                                                                                                                                                                                                                                                                                                                                                                                                                                                                                                                                                                                                                                                                                                                                                                                                                                                                                                                                                                                                                                                                                                                                                                                                                                                                                                                                               |   |            |             |             |   |            |             |             |   |            |             |             |   |            |             |             |   |            |             |             |   |            |             |             |   |            |             |            |   |            |             |            |   |            |             |             |   |            |             |             |   |            |             |             |   |             |             |             |   |             |             |             |   |             |             |             |   |             |            |             |   |             |             |             |   |             |             |             |   |             |             |             |   |             |            |             |   |             |             |             |   |             |             |             |   |             |             |             |   |             |             |             |   |             |            |             |   |             |             |             |   |             |             |            |   |             |            |             |   |             |             |             |   |             |            |            |                                                                                                                                                                                                                                                                                                                                                                                                                                                                                                                                                                                                                                                                                                                                                                                                                                                                                                                                                                                                                                                                                                                                                                                                                                                                                                                                                                                                                                                                                                                                                                                                                                                                                                                                                                                                                                                                                                                                                                                                                                                                                                                                                                                                                                                                                                                                                                                                                                                                                                                        |            |            |            |             |            |            |            |                                                                                                                                                                                                                                                                                                                                                                                                                                                                                                                                                                                                                                                                                                                                                                                                                                                                                                                                                                                                                                                                                                                                                                                                                                                                                                                                                                                                                                                                                                                                                                                                                                                                                                                                                                                                                                                                                                                                                                                                                                                                                                                                                                                                                                                                                                                                                                                                                                                                                                                                                                                             |   |            |             |             |   |            |             |             |   |            |             |             |   |            |             |             |   |            |             |             |   |            |             |             |   |            |             |            |   |            |             |            |   |            |            |             |   |            |             |             |   |            |             |             |   |             |             |             |   |             |             |             |   |             |            |             |   |             |             |             |   |             |             |             |   |             |            |             |   |             |             |             |   |             |             |             |   |             |             |             |   |             |             |             |   |             |             |             |   |             |             |             |   |             |            |             |   |             |             |             |   |             |             |            |   |             |             |             |   |             |            |             |   |            |            |            |   |            |            |            |   |            |            |            |
| C                                                                                                                                                                                                                                                                                                                                                                                                                                                                                                                                                                                                                                                                                                                                                                                                                                                                                                                                                                                                                                                                                                                                                                                                                                                                                                                                                                                                                                                                                                                                                                                                                                                                                                                                                                                                                                                                                                                                                                                                                                                                                                                                                                                                                                                                                                                                               | 2.25496700  | -1.93779200                                                                        | -0.02198700                                                                          |             |   |            |            |             |   |            |             |             |   |            |             |             |   |            |             |             |   |            |             |             |   |            |            |             |   |            |             |             |   |            |             |            |   |            |             |             |   |            |            |             |   |            |             |             |   |            |             |             |   |             |             |             |   |             |             |             |   |             |             |            |   |             |             |             |   |             |             |             |   |             |             |             |   |             |             |             |   |             |             |            |   |             |             |             |   |             |            |             |   |             |             |             |   |             |            |             |   |             |            |             |   |             |             |             |                                                                                                                                                                                                                                                                                                                                                                                                                                                                                                                                                                                                                                                                                                                                                                                                                                                                                                                                                                                                                                                                                                                                                                                                                                                                                                                                                                                                                                                                                                                                                                                                                                                                                                                                                                                                                                                                                                                                                                                                                                                                                                                                                                                                                                                                                                                                                                                                                                                                                                                     |            |             |            |                                                                                                                                                                                                                                                                                                                                                                                                                                                                                                                                                                                                                                                                                                                                                                                                                                                                                                                                                                                                                                                                                                                                                                                                                                                                                                                                                                                                                                                                                                                                                                                                                                                                                                                                                                                                                                                                                                                                                                                                                                                                                                                                                                                                                                                                                                                                                                                                                                                                                                                                                                                               |   |            |             |             |   |            |             |             |   |            |             |             |   |            |             |             |   |            |             |             |   |            |             |             |   |            |             |            |   |            |             |            |   |            |             |             |   |            |             |             |   |            |             |             |   |             |             |             |   |             |             |             |   |             |             |             |   |             |            |             |   |             |             |             |   |             |             |             |   |             |             |             |   |             |            |             |   |             |             |             |   |             |             |             |   |             |             |             |   |             |             |             |   |             |            |             |   |             |             |             |   |             |             |            |   |             |            |             |   |             |             |             |   |             |            |            |                                                                                                                                                                                                                                                                                                                                                                                                                                                                                                                                                                                                                                                                                                                                                                                                                                                                                                                                                                                                                                                                                                                                                                                                                                                                                                                                                                                                                                                                                                                                                                                                                                                                                                                                                                                                                                                                                                                                                                                                                                                                                                                                                                                                                                                                                                                                                                                                                                                                                                                        |            |            |            |             |            |            |            |                                                                                                                                                                                                                                                                                                                                                                                                                                                                                                                                                                                                                                                                                                                                                                                                                                                                                                                                                                                                                                                                                                                                                                                                                                                                                                                                                                                                                                                                                                                                                                                                                                                                                                                                                                                                                                                                                                                                                                                                                                                                                                                                                                                                                                                                                                                                                                                                                                                                                                                                                                                             |   |            |             |             |   |            |             |             |   |            |             |             |   |            |             |             |   |            |             |             |   |            |             |             |   |            |             |            |   |            |             |            |   |            |            |             |   |            |             |             |   |            |             |             |   |             |             |             |   |             |             |             |   |             |            |             |   |             |             |             |   |             |             |             |   |             |            |             |   |             |             |             |   |             |             |             |   |             |             |             |   |             |             |             |   |             |             |             |   |             |             |             |   |             |            |             |   |             |             |             |   |             |             |            |   |             |             |             |   |             |            |             |   |            |            |            |   |            |            |            |   |            |            |            |
| C                                                                                                                                                                                                                                                                                                                                                                                                                                                                                                                                                                                                                                                                                                                                                                                                                                                                                                                                                                                                                                                                                                                                                                                                                                                                                                                                                                                                                                                                                                                                                                                                                                                                                                                                                                                                                                                                                                                                                                                                                                                                                                                                                                                                                                                                                                                                               | 3.64466400  | -1.91133100                                                                        | 0.06942800                                                                           |             |   |            |            |             |   |            |             |             |   |            |             |             |   |            |             |             |   |            |             |             |   |            |            |             |   |            |             |             |   |            |             |            |   |            |             |             |   |            |            |             |   |            |             |             |   |            |             |             |   |             |             |             |   |             |             |             |   |             |             |            |   |             |             |             |   |             |             |             |   |             |             |             |   |             |             |             |   |             |             |            |   |             |             |             |   |             |            |             |   |             |             |             |   |             |            |             |   |             |            |             |   |             |             |             |                                                                                                                                                                                                                                                                                                                                                                                                                                                                                                                                                                                                                                                                                                                                                                                                                                                                                                                                                                                                                                                                                                                                                                                                                                                                                                                                                                                                                                                                                                                                                                                                                                                                                                                                                                                                                                                                                                                                                                                                                                                                                                                                                                                                                                                                                                                                                                                                                                                                                                                     |            |             |            |                                                                                                                                                                                                                                                                                                                                                                                                                                                                                                                                                                                                                                                                                                                                                                                                                                                                                                                                                                                                                                                                                                                                                                                                                                                                                                                                                                                                                                                                                                                                                                                                                                                                                                                                                                                                                                                                                                                                                                                                                                                                                                                                                                                                                                                                                                                                                                                                                                                                                                                                                                                               |   |            |             |             |   |            |             |             |   |            |             |             |   |            |             |             |   |            |             |             |   |            |             |             |   |            |             |            |   |            |             |            |   |            |             |             |   |            |             |             |   |            |             |             |   |             |             |             |   |             |             |             |   |             |             |             |   |             |            |             |   |             |             |             |   |             |             |             |   |             |             |             |   |             |            |             |   |             |             |             |   |             |             |             |   |             |             |             |   |             |             |             |   |             |            |             |   |             |             |             |   |             |             |            |   |             |            |             |   |             |             |             |   |             |            |            |                                                                                                                                                                                                                                                                                                                                                                                                                                                                                                                                                                                                                                                                                                                                                                                                                                                                                                                                                                                                                                                                                                                                                                                                                                                                                                                                                                                                                                                                                                                                                                                                                                                                                                                                                                                                                                                                                                                                                                                                                                                                                                                                                                                                                                                                                                                                                                                                                                                                                                                        |            |            |            |             |            |            |            |                                                                                                                                                                                                                                                                                                                                                                                                                                                                                                                                                                                                                                                                                                                                                                                                                                                                                                                                                                                                                                                                                                                                                                                                                                                                                                                                                                                                                                                                                                                                                                                                                                                                                                                                                                                                                                                                                                                                                                                                                                                                                                                                                                                                                                                                                                                                                                                                                                                                                                                                                                                             |   |            |             |             |   |            |             |             |   |            |             |             |   |            |             |             |   |            |             |             |   |            |             |             |   |            |             |            |   |            |             |            |   |            |            |             |   |            |             |             |   |            |             |             |   |             |             |             |   |             |             |             |   |             |            |             |   |             |             |             |   |             |             |             |   |             |            |             |   |             |             |             |   |             |             |             |   |             |             |             |   |             |             |             |   |             |             |             |   |             |             |             |   |             |            |             |   |             |             |             |   |             |             |            |   |             |             |             |   |             |            |             |   |            |            |            |   |            |            |            |   |            |            |            |
| C                                                                                                                                                                                                                                                                                                                                                                                                                                                                                                                                                                                                                                                                                                                                                                                                                                                                                                                                                                                                                                                                                                                                                                                                                                                                                                                                                                                                                                                                                                                                                                                                                                                                                                                                                                                                                                                                                                                                                                                                                                                                                                                                                                                                                                                                                                                                               | 4.31309700  | -0.70124000                                                                        | 0.12897100                                                                           |             |   |            |            |             |   |            |             |             |   |            |             |             |   |            |             |             |   |            |             |             |   |            |            |             |   |            |             |             |   |            |             |            |   |            |             |             |   |            |            |             |   |            |             |             |   |            |             |             |   |             |             |             |   |             |             |             |   |             |             |            |   |             |             |             |   |             |             |             |   |             |             |             |   |             |             |             |   |             |             |            |   |             |             |             |   |             |            |             |   |             |             |             |   |             |            |             |   |             |            |             |   |             |             |             |                                                                                                                                                                                                                                                                                                                                                                                                                                                                                                                                                                                                                                                                                                                                                                                                                                                                                                                                                                                                                                                                                                                                                                                                                                                                                                                                                                                                                                                                                                                                                                                                                                                                                                                                                                                                                                                                                                                                                                                                                                                                                                                                                                                                                                                                                                                                                                                                                                                                                                                     |            |             |            |                                                                                                                                                                                                                                                                                                                                                                                                                                                                                                                                                                                                                                                                                                                                                                                                                                                                                                                                                                                                                                                                                                                                                                                                                                                                                                                                                                                                                                                                                                                                                                                                                                                                                                                                                                                                                                                                                                                                                                                                                                                                                                                                                                                                                                                                                                                                                                                                                                                                                                                                                                                               |   |            |             |             |   |            |             |             |   |            |             |             |   |            |             |             |   |            |             |             |   |            |             |             |   |            |             |            |   |            |             |            |   |            |             |             |   |            |             |             |   |            |             |             |   |             |             |             |   |             |             |             |   |             |             |             |   |             |            |             |   |             |             |             |   |             |             |             |   |             |             |             |   |             |            |             |   |             |             |             |   |             |             |             |   |             |             |             |   |             |             |             |   |             |            |             |   |             |             |             |   |             |             |            |   |             |            |             |   |             |             |             |   |             |            |            |                                                                                                                                                                                                                                                                                                                                                                                                                                                                                                                                                                                                                                                                                                                                                                                                                                                                                                                                                                                                                                                                                                                                                                                                                                                                                                                                                                                                                                                                                                                                                                                                                                                                                                                                                                                                                                                                                                                                                                                                                                                                                                                                                                                                                                                                                                                                                                                                                                                                                                                        |            |            |            |             |            |            |            |                                                                                                                                                                                                                                                                                                                                                                                                                                                                                                                                                                                                                                                                                                                                                                                                                                                                                                                                                                                                                                                                                                                                                                                                                                                                                                                                                                                                                                                                                                                                                                                                                                                                                                                                                                                                                                                                                                                                                                                                                                                                                                                                                                                                                                                                                                                                                                                                                                                                                                                                                                                             |   |            |             |             |   |            |             |             |   |            |             |             |   |            |             |             |   |            |             |             |   |            |             |             |   |            |             |            |   |            |             |            |   |            |            |             |   |            |             |             |   |            |             |             |   |             |             |             |   |             |             |             |   |             |            |             |   |             |             |             |   |             |             |             |   |             |            |             |   |             |             |             |   |             |             |             |   |             |             |             |   |             |             |             |   |             |             |             |   |             |             |             |   |             |            |             |   |             |             |             |   |             |             |            |   |             |             |             |   |             |            |             |   |            |            |            |   |            |            |            |   |            |            |            |
| H                                                                                                                                                                                                                                                                                                                                                                                                                                                                                                                                                                                                                                                                                                                                                                                                                                                                                                                                                                                                                                                                                                                                                                                                                                                                                                                                                                                                                                                                                                                                                                                                                                                                                                                                                                                                                                                                                                                                                                                                                                                                                                                                                                                                                                                                                                                                               | 4.07666300  | 1.44669900                                                                         | 0.13107400                                                                           |             |   |            |            |             |   |            |             |             |   |            |             |             |   |            |             |             |   |            |             |             |   |            |            |             |   |            |             |             |   |            |             |            |   |            |             |             |   |            |            |             |   |            |             |             |   |            |             |             |   |             |             |             |   |             |             |             |   |             |             |            |   |             |             |             |   |             |             |             |   |             |             |             |   |             |             |             |   |             |             |            |   |             |             |             |   |             |            |             |   |             |             |             |   |             |            |             |   |             |            |             |   |             |             |             |                                                                                                                                                                                                                                                                                                                                                                                                                                                                                                                                                                                                                                                                                                                                                                                                                                                                                                                                                                                                                                                                                                                                                                                                                                                                                                                                                                                                                                                                                                                                                                                                                                                                                                                                                                                                                                                                                                                                                                                                                                                                                                                                                                                                                                                                                                                                                                                                                                                                                                                     |            |             |            |                                                                                                                                                                                                                                                                                                                                                                                                                                                                                                                                                                                                                                                                                                                                                                                                                                                                                                                                                                                                                                                                                                                                                                                                                                                                                                                                                                                                                                                                                                                                                                                                                                                                                                                                                                                                                                                                                                                                                                                                                                                                                                                                                                                                                                                                                                                                                                                                                                                                                                                                                                                               |   |            |             |             |   |            |             |             |   |            |             |             |   |            |             |             |   |            |             |             |   |            |             |             |   |            |             |            |   |            |             |            |   |            |             |             |   |            |             |             |   |            |             |             |   |             |             |             |   |             |             |             |   |             |             |             |   |             |            |             |   |             |             |             |   |             |             |             |   |             |             |             |   |             |            |             |   |             |             |             |   |             |             |             |   |             |             |             |   |             |             |             |   |             |            |             |   |             |             |             |   |             |             |            |   |             |            |             |   |             |             |             |   |             |            |            |                                                                                                                                                                                                                                                                                                                                                                                                                                                                                                                                                                                                                                                                                                                                                                                                                                                                                                                                                                                                                                                                                                                                                                                                                                                                                                                                                                                                                                                                                                                                                                                                                                                                                                                                                                                                                                                                                                                                                                                                                                                                                                                                                                                                                                                                                                                                                                                                                                                                                                                        |            |            |            |             |            |            |            |                                                                                                                                                                                                                                                                                                                                                                                                                                                                                                                                                                                                                                                                                                                                                                                                                                                                                                                                                                                                                                                                                                                                                                                                                                                                                                                                                                                                                                                                                                                                                                                                                                                                                                                                                                                                                                                                                                                                                                                                                                                                                                                                                                                                                                                                                                                                                                                                                                                                                                                                                                                             |   |            |             |             |   |            |             |             |   |            |             |             |   |            |             |             |   |            |             |             |   |            |             |             |   |            |             |            |   |            |             |            |   |            |            |             |   |            |             |             |   |            |             |             |   |             |             |             |   |             |             |             |   |             |            |             |   |             |             |             |   |             |             |             |   |             |            |             |   |             |             |             |   |             |             |             |   |             |             |             |   |             |             |             |   |             |             |             |   |             |             |             |   |             |            |             |   |             |             |             |   |             |             |            |   |             |             |             |   |             |            |             |   |            |            |            |   |            |            |            |   |            |            |            |
| H                                                                                                                                                                                                                                                                                                                                                                                                                                                                                                                                                                                                                                                                                                                                                                                                                                                                                                                                                                                                                                                                                                                                                                                                                                                                                                                                                                                                                                                                                                                                                                                                                                                                                                                                                                                                                                                                                                                                                                                                                                                                                                                                                                                                                                                                                                                                               | 1.71776900  | -2.87746300                                                                        | -0.06944400                                                                          |             |   |            |            |             |   |            |             |             |   |            |             |             |   |            |             |             |   |            |             |             |   |            |            |             |   |            |             |             |   |            |             |            |   |            |             |             |   |            |            |             |   |            |             |             |   |            |             |             |   |             |             |             |   |             |             |             |   |             |             |            |   |             |             |             |   |             |             |             |   |             |             |             |   |             |             |             |   |             |             |            |   |             |             |             |   |             |            |             |   |             |             |             |   |             |            |             |   |             |            |             |   |             |             |             |                                                                                                                                                                                                                                                                                                                                                                                                                                                                                                                                                                                                                                                                                                                                                                                                                                                                                                                                                                                                                                                                                                                                                                                                                                                                                                                                                                                                                                                                                                                                                                                                                                                                                                                                                                                                                                                                                                                                                                                                                                                                                                                                                                                                                                                                                                                                                                                                                                                                                                                     |            |             |            |                                                                                                                                                                                                                                                                                                                                                                                                                                                                                                                                                                                                                                                                                                                                                                                                                                                                                                                                                                                                                                                                                                                                                                                                                                                                                                                                                                                                                                                                                                                                                                                                                                                                                                                                                                                                                                                                                                                                                                                                                                                                                                                                                                                                                                                                                                                                                                                                                                                                                                                                                                                               |   |            |             |             |   |            |             |             |   |            |             |             |   |            |             |             |   |            |             |             |   |            |             |             |   |            |             |            |   |            |             |            |   |            |             |             |   |            |             |             |   |            |             |             |   |             |             |             |   |             |             |             |   |             |             |             |   |             |            |             |   |             |             |             |   |             |             |             |   |             |             |             |   |             |            |             |   |             |             |             |   |             |             |             |   |             |             |             |   |             |             |             |   |             |            |             |   |             |             |             |   |             |             |            |   |             |            |             |   |             |             |             |   |             |            |            |                                                                                                                                                                                                                                                                                                                                                                                                                                                                                                                                                                                                                                                                                                                                                                                                                                                                                                                                                                                                                                                                                                                                                                                                                                                                                                                                                                                                                                                                                                                                                                                                                                                                                                                                                                                                                                                                                                                                                                                                                                                                                                                                                                                                                                                                                                                                                                                                                                                                                                                        |            |            |            |             |            |            |            |                                                                                                                                                                                                                                                                                                                                                                                                                                                                                                                                                                                                                                                                                                                                                                                                                                                                                                                                                                                                                                                                                                                                                                                                                                                                                                                                                                                                                                                                                                                                                                                                                                                                                                                                                                                                                                                                                                                                                                                                                                                                                                                                                                                                                                                                                                                                                                                                                                                                                                                                                                                             |   |            |             |             |   |            |             |             |   |            |             |             |   |            |             |             |   |            |             |             |   |            |             |             |   |            |             |            |   |            |             |            |   |            |            |             |   |            |             |             |   |            |             |             |   |             |             |             |   |             |             |             |   |             |            |             |   |             |             |             |   |             |             |             |   |             |            |             |   |             |             |             |   |             |             |             |   |             |             |             |   |             |             |             |   |             |             |             |   |             |             |             |   |             |            |             |   |             |             |             |   |             |             |            |   |             |             |             |   |             |            |             |   |            |            |            |   |            |            |            |   |            |            |            |
| H                                                                                                                                                                                                                                                                                                                                                                                                                                                                                                                                                                                                                                                                                                                                                                                                                                                                                                                                                                                                                                                                                                                                                                                                                                                                                                                                                                                                                                                                                                                                                                                                                                                                                                                                                                                                                                                                                                                                                                                                                                                                                                                                                                                                                                                                                                                                               | 4.19477200  | -2.84461200                                                                        | 0.09556200                                                                           |             |   |            |            |             |   |            |             |             |   |            |             |             |   |            |             |             |   |            |             |             |   |            |            |             |   |            |             |             |   |            |             |            |   |            |             |             |   |            |            |             |   |            |             |             |   |            |             |             |   |             |             |             |   |             |             |             |   |             |             |            |   |             |             |             |   |             |             |             |   |             |             |             |   |             |             |             |   |             |             |            |   |             |             |             |   |             |            |             |   |             |             |             |   |             |            |             |   |             |            |             |   |             |             |             |                                                                                                                                                                                                                                                                                                                                                                                                                                                                                                                                                                                                                                                                                                                                                                                                                                                                                                                                                                                                                                                                                                                                                                                                                                                                                                                                                                                                                                                                                                                                                                                                                                                                                                                                                                                                                                                                                                                                                                                                                                                                                                                                                                                                                                                                                                                                                                                                                                                                                                                     |            |             |            |                                                                                                                                                                                                                                                                                                                                                                                                                                                                                                                                                                                                                                                                                                                                                                                                                                                                                                                                                                                                                                                                                                                                                                                                                                                                                                                                                                                                                                                                                                                                                                                                                                                                                                                                                                                                                                                                                                                                                                                                                                                                                                                                                                                                                                                                                                                                                                                                                                                                                                                                                                                               |   |            |             |             |   |            |             |             |   |            |             |             |   |            |             |             |   |            |             |             |   |            |             |             |   |            |             |            |   |            |             |            |   |            |             |             |   |            |             |             |   |            |             |             |   |             |             |             |   |             |             |             |   |             |             |             |   |             |            |             |   |             |             |             |   |             |             |             |   |             |             |             |   |             |            |             |   |             |             |             |   |             |             |             |   |             |             |             |   |             |             |             |   |             |            |             |   |             |             |             |   |             |             |            |   |             |            |             |   |             |             |             |   |             |            |            |                                                                                                                                                                                                                                                                                                                                                                                                                                                                                                                                                                                                                                                                                                                                                                                                                                                                                                                                                                                                                                                                                                                                                                                                                                                                                                                                                                                                                                                                                                                                                                                                                                                                                                                                                                                                                                                                                                                                                                                                                                                                                                                                                                                                                                                                                                                                                                                                                                                                                                                        |            |            |            |             |            |            |            |                                                                                                                                                                                                                                                                                                                                                                                                                                                                                                                                                                                                                                                                                                                                                                                                                                                                                                                                                                                                                                                                                                                                                                                                                                                                                                                                                                                                                                                                                                                                                                                                                                                                                                                                                                                                                                                                                                                                                                                                                                                                                                                                                                                                                                                                                                                                                                                                                                                                                                                                                                                             |   |            |             |             |   |            |             |             |   |            |             |             |   |            |             |             |   |            |             |             |   |            |             |             |   |            |             |            |   |            |             |            |   |            |            |             |   |            |             |             |   |            |             |             |   |             |             |             |   |             |             |             |   |             |            |             |   |             |             |             |   |             |             |             |   |             |            |             |   |             |             |             |   |             |             |             |   |             |             |             |   |             |             |             |   |             |             |             |   |             |             |             |   |             |            |             |   |             |             |             |   |             |             |            |   |             |             |             |   |             |            |             |   |            |            |            |   |            |            |            |   |            |            |            |
| H                                                                                                                                                                                                                                                                                                                                                                                                                                                                                                                                                                                                                                                                                                                                                                                                                                                                                                                                                                                                                                                                                                                                                                                                                                                                                                                                                                                                                                                                                                                                                                                                                                                                                                                                                                                                                                                                                                                                                                                                                                                                                                                                                                                                                                                                                                                                               | 5.39361300  | -0.67407100                                                                        | 0.20103000                                                                           |             |   |            |            |             |   |            |             |             |   |            |             |             |   |            |             |             |   |            |             |             |   |            |            |             |   |            |             |             |   |            |             |            |   |            |             |             |   |            |            |             |   |            |             |             |   |            |             |             |   |             |             |             |   |             |             |             |   |             |             |            |   |             |             |             |   |             |             |             |   |             |             |             |   |             |             |             |   |             |             |            |   |             |             |             |   |             |            |             |   |             |             |             |   |             |            |             |   |             |            |             |   |             |             |             |                                                                                                                                                                                                                                                                                                                                                                                                                                                                                                                                                                                                                                                                                                                                                                                                                                                                                                                                                                                                                                                                                                                                                                                                                                                                                                                                                                                                                                                                                                                                                                                                                                                                                                                                                                                                                                                                                                                                                                                                                                                                                                                                                                                                                                                                                                                                                                                                                                                                                                                     |            |             |            |                                                                                                                                                                                                                                                                                                                                                                                                                                                                                                                                                                                                                                                                                                                                                                                                                                                                                                                                                                                                                                                                                                                                                                                                                                                                                                                                                                                                                                                                                                                                                                                                                                                                                                                                                                                                                                                                                                                                                                                                                                                                                                                                                                                                                                                                                                                                                                                                                                                                                                                                                                                               |   |            |             |             |   |            |             |             |   |            |             |             |   |            |             |             |   |            |             |             |   |            |             |             |   |            |             |            |   |            |             |            |   |            |             |             |   |            |             |             |   |            |             |             |   |             |             |             |   |             |             |             |   |             |             |             |   |             |            |             |   |             |             |             |   |             |             |             |   |             |             |             |   |             |            |             |   |             |             |             |   |             |             |             |   |             |             |             |   |             |             |             |   |             |            |             |   |             |             |             |   |             |             |            |   |             |            |             |   |             |             |             |   |             |            |            |                                                                                                                                                                                                                                                                                                                                                                                                                                                                                                                                                                                                                                                                                                                                                                                                                                                                                                                                                                                                                                                                                                                                                                                                                                                                                                                                                                                                                                                                                                                                                                                                                                                                                                                                                                                                                                                                                                                                                                                                                                                                                                                                                                                                                                                                                                                                                                                                                                                                                                                        |            |            |            |             |            |            |            |                                                                                                                                                                                                                                                                                                                                                                                                                                                                                                                                                                                                                                                                                                                                                                                                                                                                                                                                                                                                                                                                                                                                                                                                                                                                                                                                                                                                                                                                                                                                                                                                                                                                                                                                                                                                                                                                                                                                                                                                                                                                                                                                                                                                                                                                                                                                                                                                                                                                                                                                                                                             |   |            |             |             |   |            |             |             |   |            |             |             |   |            |             |             |   |            |             |             |   |            |             |             |   |            |             |            |   |            |             |            |   |            |            |             |   |            |             |             |   |            |             |             |   |             |             |             |   |             |             |             |   |             |            |             |   |             |             |             |   |             |             |             |   |             |            |             |   |             |             |             |   |             |             |             |   |             |             |             |   |             |             |             |   |             |             |             |   |             |             |             |   |             |            |             |   |             |             |             |   |             |             |            |   |             |             |             |   |             |            |             |   |            |            |            |   |            |            |            |   |            |            |            |
| C                                                                                                                                                                                                                                                                                                                                                                                                                                                                                                                                                                                                                                                                                                                                                                                                                                                                                                                                                                                                                                                                                                                                                                                                                                                                                                                                                                                                                                                                                                                                                                                                                                                                                                                                                                                                                                                                                                                                                                                                                                                                                                                                                                                                                                                                                                                                               | 1.40817500  | 1.75510200                                                                         | -0.04747600                                                                          |             |   |            |            |             |   |            |             |             |   |            |             |             |   |            |             |             |   |            |             |             |   |            |            |             |   |            |             |             |   |            |             |            |   |            |             |             |   |            |            |             |   |            |             |             |   |            |             |             |   |             |             |             |   |             |             |             |   |             |             |            |   |             |             |             |   |             |             |             |   |             |             |             |   |             |             |             |   |             |             |            |   |             |             |             |   |             |            |             |   |             |             |             |   |             |            |             |   |             |            |             |   |             |             |             |                                                                                                                                                                                                                                                                                                                                                                                                                                                                                                                                                                                                                                                                                                                                                                                                                                                                                                                                                                                                                                                                                                                                                                                                                                                                                                                                                                                                                                                                                                                                                                                                                                                                                                                                                                                                                                                                                                                                                                                                                                                                                                                                                                                                                                                                                                                                                                                                                                                                                                                     |            |             |            |                                                                                                                                                                                                                                                                                                                                                                                                                                                                                                                                                                                                                                                                                                                                                                                                                                                                                                                                                                                                                                                                                                                                                                                                                                                                                                                                                                                                                                                                                                                                                                                                                                                                                                                                                                                                                                                                                                                                                                                                                                                                                                                                                                                                                                                                                                                                                                                                                                                                                                                                                                                               |   |            |             |             |   |            |             |             |   |            |             |             |   |            |             |             |   |            |             |             |   |            |             |             |   |            |             |            |   |            |             |            |   |            |             |             |   |            |             |             |   |            |             |             |   |             |             |             |   |             |             |             |   |             |             |             |   |             |            |             |   |             |             |             |   |             |             |             |   |             |             |             |   |             |            |             |   |             |             |             |   |             |             |             |   |             |             |             |   |             |             |             |   |             |            |             |   |             |             |             |   |             |             |            |   |             |            |             |   |             |             |             |   |             |            |            |                                                                                                                                                                                                                                                                                                                                                                                                                                                                                                                                                                                                                                                                                                                                                                                                                                                                                                                                                                                                                                                                                                                                                                                                                                                                                                                                                                                                                                                                                                                                                                                                                                                                                                                                                                                                                                                                                                                                                                                                                                                                                                                                                                                                                                                                                                                                                                                                                                                                                                                        |            |            |            |             |            |            |            |                                                                                                                                                                                                                                                                                                                                                                                                                                                                                                                                                                                                                                                                                                                                                                                                                                                                                                                                                                                                                                                                                                                                                                                                                                                                                                                                                                                                                                                                                                                                                                                                                                                                                                                                                                                                                                                                                                                                                                                                                                                                                                                                                                                                                                                                                                                                                                                                                                                                                                                                                                                             |   |            |             |             |   |            |             |             |   |            |             |             |   |            |             |             |   |            |             |             |   |            |             |             |   |            |             |            |   |            |             |            |   |            |            |             |   |            |             |             |   |            |             |             |   |             |             |             |   |             |             |             |   |             |            |             |   |             |             |             |   |             |             |             |   |             |            |             |   |             |             |             |   |             |             |             |   |             |             |             |   |             |             |             |   |             |             |             |   |             |             |             |   |             |            |             |   |             |             |             |   |             |             |            |   |             |             |             |   |             |            |             |   |            |            |            |   |            |            |            |   |            |            |            |
| O                                                                                                                                                                                                                                                                                                                                                                                                                                                                                                                                                                                                                                                                                                                                                                                                                                                                                                                                                                                                                                                                                                                                                                                                                                                                                                                                                                                                                                                                                                                                                                                                                                                                                                                                                                                                                                                                                                                                                                                                                                                                                                                                                                                                                                                                                                                                               | 2.04195400  | 2.87793000                                                                         | -0.05355500                                                                          |             |   |            |            |             |   |            |             |             |   |            |             |             |   |            |             |             |   |            |             |             |   |            |            |             |   |            |             |             |   |            |             |            |   |            |             |             |   |            |            |             |   |            |             |             |   |            |             |             |   |             |             |             |   |             |             |             |   |             |             |            |   |             |             |             |   |             |             |             |   |             |             |             |   |             |             |             |   |             |             |            |   |             |             |             |   |             |            |             |   |             |             |             |   |             |            |             |   |             |            |             |   |             |             |             |                                                                                                                                                                                                                                                                                                                                                                                                                                                                                                                                                                                                                                                                                                                                                                                                                                                                                                                                                                                                                                                                                                                                                                                                                                                                                                                                                                                                                                                                                                                                                                                                                                                                                                                                                                                                                                                                                                                                                                                                                                                                                                                                                                                                                                                                                                                                                                                                                                                                                                                     |            |             |            |                                                                                                                                                                                                                                                                                                                                                                                                                                                                                                                                                                                                                                                                                                                                                                                                                                                                                                                                                                                                                                                                                                                                                                                                                                                                                                                                                                                                                                                                                                                                                                                                                                                                                                                                                                                                                                                                                                                                                                                                                                                                                                                                                                                                                                                                                                                                                                                                                                                                                                                                                                                               |   |            |             |             |   |            |             |             |   |            |             |             |   |            |             |             |   |            |             |             |   |            |             |             |   |            |             |            |   |            |             |            |   |            |             |             |   |            |             |             |   |            |             |             |   |             |             |             |   |             |             |             |   |             |             |             |   |             |            |             |   |             |             |             |   |             |             |             |   |             |             |             |   |             |            |             |   |             |             |             |   |             |             |             |   |             |             |             |   |             |             |             |   |             |            |             |   |             |             |             |   |             |             |            |   |             |            |             |   |             |             |             |   |             |            |            |                                                                                                                                                                                                                                                                                                                                                                                                                                                                                                                                                                                                                                                                                                                                                                                                                                                                                                                                                                                                                                                                                                                                                                                                                                                                                                                                                                                                                                                                                                                                                                                                                                                                                                                                                                                                                                                                                                                                                                                                                                                                                                                                                                                                                                                                                                                                                                                                                                                                                                                        |            |            |            |             |            |            |            |                                                                                                                                                                                                                                                                                                                                                                                                                                                                                                                                                                                                                                                                                                                                                                                                                                                                                                                                                                                                                                                                                                                                                                                                                                                                                                                                                                                                                                                                                                                                                                                                                                                                                                                                                                                                                                                                                                                                                                                                                                                                                                                                                                                                                                                                                                                                                                                                                                                                                                                                                                                             |   |            |             |             |   |            |             |             |   |            |             |             |   |            |             |             |   |            |             |             |   |            |             |             |   |            |             |            |   |            |             |            |   |            |            |             |   |            |             |             |   |            |             |             |   |             |             |             |   |             |             |             |   |             |            |             |   |             |             |             |   |             |             |             |   |             |            |             |   |             |             |             |   |             |             |             |   |             |             |             |   |             |             |             |   |             |             |             |   |             |             |             |   |             |            |             |   |             |             |             |   |             |             |            |   |             |             |             |   |             |            |             |   |            |            |            |   |            |            |            |   |            |            |            |
| O                                                                                                                                                                                                                                                                                                                                                                                                                                                                                                                                                                                                                                                                                                                                                                                                                                                                                                                                                                                                                                                                                                                                                                                                                                                                                                                                                                                                                                                                                                                                                                                                                                                                                                                                                                                                                                                                                                                                                                                                                                                                                                                                                                                                                                                                                                                                               | 0.19712700  | -0.85287000                                                                        | -0.16591600                                                                          |             |   |            |            |             |   |            |             |             |   |            |             |             |   |            |             |             |   |            |             |             |   |            |            |             |   |            |             |             |   |            |             |            |   |            |             |             |   |            |            |             |   |            |             |             |   |            |             |             |   |             |             |             |   |             |             |             |   |             |             |            |   |             |             |             |   |             |             |             |   |             |             |             |   |             |             |             |   |             |             |            |   |             |             |             |   |             |            |             |   |             |             |             |   |             |            |             |   |             |            |             |   |             |             |             |                                                                                                                                                                                                                                                                                                                                                                                                                                                                                                                                                                                                                                                                                                                                                                                                                                                                                                                                                                                                                                                                                                                                                                                                                                                                                                                                                                                                                                                                                                                                                                                                                                                                                                                                                                                                                                                                                                                                                                                                                                                                                                                                                                                                                                                                                                                                                                                                                                                                                                                     |            |             |            |                                                                                                                                                                                                                                                                                                                                                                                                                                                                                                                                                                                                                                                                                                                                                                                                                                                                                                                                                                                                                                                                                                                                                                                                                                                                                                                                                                                                                                                                                                                                                                                                                                                                                                                                                                                                                                                                                                                                                                                                                                                                                                                                                                                                                                                                                                                                                                                                                                                                                                                                                                                               |   |            |             |             |   |            |             |             |   |            |             |             |   |            |             |             |   |            |             |             |   |            |             |             |   |            |             |            |   |            |             |            |   |            |             |             |   |            |             |             |   |            |             |             |   |             |             |             |   |             |             |             |   |             |             |             |   |             |            |             |   |             |             |             |   |             |             |             |   |             |             |             |   |             |            |             |   |             |             |             |   |             |             |             |   |             |             |             |   |             |             |             |   |             |            |             |   |             |             |             |   |             |             |            |   |             |            |             |   |             |             |             |   |             |            |            |                                                                                                                                                                                                                                                                                                                                                                                                                                                                                                                                                                                                                                                                                                                                                                                                                                                                                                                                                                                                                                                                                                                                                                                                                                                                                                                                                                                                                                                                                                                                                                                                                                                                                                                                                                                                                                                                                                                                                                                                                                                                                                                                                                                                                                                                                                                                                                                                                                                                                                                        |            |            |            |             |            |            |            |                                                                                                                                                                                                                                                                                                                                                                                                                                                                                                                                                                                                                                                                                                                                                                                                                                                                                                                                                                                                                                                                                                                                                                                                                                                                                                                                                                                                                                                                                                                                                                                                                                                                                                                                                                                                                                                                                                                                                                                                                                                                                                                                                                                                                                                                                                                                                                                                                                                                                                                                                                                             |   |            |             |             |   |            |             |             |   |            |             |             |   |            |             |             |   |            |             |             |   |            |             |             |   |            |             |            |   |            |             |            |   |            |            |             |   |            |             |             |   |            |             |             |   |             |             |             |   |             |             |             |   |             |            |             |   |             |             |             |   |             |             |             |   |             |            |             |   |             |             |             |   |             |             |             |   |             |             |             |   |             |             |             |   |             |             |             |   |             |             |             |   |             |            |             |   |             |             |             |   |             |             |            |   |             |             |             |   |             |            |             |   |            |            |            |   |            |            |            |   |            |            |            |
| C                                                                                                                                                                                                                                                                                                                                                                                                                                                                                                                                                                                                                                                                                                                                                                                                                                                                                                                                                                                                                                                                                                                                                                                                                                                                                                                                                                                                                                                                                                                                                                                                                                                                                                                                                                                                                                                                                                                                                                                                                                                                                                                                                                                                                                                                                                                                               | -1.97213200 | 0.04599700                                                                         | -0.01594500                                                                          |             |   |            |            |             |   |            |             |             |   |            |             |             |   |            |             |             |   |            |             |             |   |            |            |             |   |            |             |             |   |            |             |            |   |            |             |             |   |            |            |             |   |            |             |             |   |            |             |             |   |             |             |             |   |             |             |             |   |             |             |            |   |             |             |             |   |             |             |             |   |             |             |             |   |             |             |             |   |             |             |            |   |             |             |             |   |             |            |             |   |             |             |             |   |             |            |             |   |             |            |             |   |             |             |             |                                                                                                                                                                                                                                                                                                                                                                                                                                                                                                                                                                                                                                                                                                                                                                                                                                                                                                                                                                                                                                                                                                                                                                                                                                                                                                                                                                                                                                                                                                                                                                                                                                                                                                                                                                                                                                                                                                                                                                                                                                                                                                                                                                                                                                                                                                                                                                                                                                                                                                                     |            |             |            |                                                                                                                                                                                                                                                                                                                                                                                                                                                                                                                                                                                                                                                                                                                                                                                                                                                                                                                                                                                                                                                                                                                                                                                                                                                                                                                                                                                                                                                                                                                                                                                                                                                                                                                                                                                                                                                                                                                                                                                                                                                                                                                                                                                                                                                                                                                                                                                                                                                                                                                                                                                               |   |            |             |             |   |            |             |             |   |            |             |             |   |            |             |             |   |            |             |             |   |            |             |             |   |            |             |            |   |            |             |            |   |            |             |             |   |            |             |             |   |            |             |             |   |             |             |             |   |             |             |             |   |             |             |             |   |             |            |             |   |             |             |             |   |             |             |             |   |             |             |             |   |             |            |             |   |             |             |             |   |             |             |             |   |             |             |             |   |             |             |             |   |             |            |             |   |             |             |             |   |             |             |            |   |             |            |             |   |             |             |             |   |             |            |            |                                                                                                                                                                                                                                                                                                                                                                                                                                                                                                                                                                                                                                                                                                                                                                                                                                                                                                                                                                                                                                                                                                                                                                                                                                                                                                                                                                                                                                                                                                                                                                                                                                                                                                                                                                                                                                                                                                                                                                                                                                                                                                                                                                                                                                                                                                                                                                                                                                                                                                                        |            |            |            |             |            |            |            |                                                                                                                                                                                                                                                                                                                                                                                                                                                                                                                                                                                                                                                                                                                                                                                                                                                                                                                                                                                                                                                                                                                                                                                                                                                                                                                                                                                                                                                                                                                                                                                                                                                                                                                                                                                                                                                                                                                                                                                                                                                                                                                                                                                                                                                                                                                                                                                                                                                                                                                                                                                             |   |            |             |             |   |            |             |             |   |            |             |             |   |            |             |             |   |            |             |             |   |            |             |             |   |            |             |            |   |            |             |            |   |            |            |             |   |            |             |             |   |            |             |             |   |             |             |             |   |             |             |             |   |             |            |             |   |             |             |             |   |             |             |             |   |             |            |             |   |             |             |             |   |             |             |             |   |             |             |             |   |             |             |             |   |             |             |             |   |             |             |             |   |             |            |             |   |             |             |             |   |             |             |            |   |             |             |             |   |             |            |             |   |            |            |            |   |            |            |            |   |            |            |            |
| C                                                                                                                                                                                                                                                                                                                                                                                                                                                                                                                                                                                                                                                                                                                                                                                                                                                                                                                                                                                                                                                                                                                                                                                                                                                                                                                                                                                                                                                                                                                                                                                                                                                                                                                                                                                                                                                                                                                                                                                                                                                                                                                                                                                                                                                                                                                                               | -2.53501100 | -1.29901900                                                                        | -0.05245300                                                                          |             |   |            |            |             |   |            |             |             |   |            |             |             |   |            |             |             |   |            |             |             |   |            |            |             |   |            |             |             |   |            |             |            |   |            |             |             |   |            |            |             |   |            |             |             |   |            |             |             |   |             |             |             |   |             |             |             |   |             |             |            |   |             |             |             |   |             |             |             |   |             |             |             |   |             |             |             |   |             |             |            |   |             |             |             |   |             |            |             |   |             |             |             |   |             |            |             |   |             |            |             |   |             |             |             |                                                                                                                                                                                                                                                                                                                                                                                                                                                                                                                                                                                                                                                                                                                                                                                                                                                                                                                                                                                                                                                                                                                                                                                                                                                                                                                                                                                                                                                                                                                                                                                                                                                                                                                                                                                                                                                                                                                                                                                                                                                                                                                                                                                                                                                                                                                                                                                                                                                                                                                     |            |             |            |                                                                                                                                                                                                                                                                                                                                                                                                                                                                                                                                                                                                                                                                                                                                                                                                                                                                                                                                                                                                                                                                                                                                                                                                                                                                                                                                                                                                                                                                                                                                                                                                                                                                                                                                                                                                                                                                                                                                                                                                                                                                                                                                                                                                                                                                                                                                                                                                                                                                                                                                                                                               |   |            |             |             |   |            |             |             |   |            |             |             |   |            |             |             |   |            |             |             |   |            |             |             |   |            |             |            |   |            |             |            |   |            |             |             |   |            |             |             |   |            |             |             |   |             |             |             |   |             |             |             |   |             |             |             |   |             |            |             |   |             |             |             |   |             |             |             |   |             |             |             |   |             |            |             |   |             |             |             |   |             |             |             |   |             |             |             |   |             |             |             |   |             |            |             |   |             |             |             |   |             |             |            |   |             |            |             |   |             |             |             |   |             |            |            |                                                                                                                                                                                                                                                                                                                                                                                                                                                                                                                                                                                                                                                                                                                                                                                                                                                                                                                                                                                                                                                                                                                                                                                                                                                                                                                                                                                                                                                                                                                                                                                                                                                                                                                                                                                                                                                                                                                                                                                                                                                                                                                                                                                                                                                                                                                                                                                                                                                                                                                        |            |            |            |             |            |            |            |                                                                                                                                                                                                                                                                                                                                                                                                                                                                                                                                                                                                                                                                                                                                                                                                                                                                                                                                                                                                                                                                                                                                                                                                                                                                                                                                                                                                                                                                                                                                                                                                                                                                                                                                                                                                                                                                                                                                                                                                                                                                                                                                                                                                                                                                                                                                                                                                                                                                                                                                                                                             |   |            |             |             |   |            |             |             |   |            |             |             |   |            |             |             |   |            |             |             |   |            |             |             |   |            |             |            |   |            |             |            |   |            |            |             |   |            |             |             |   |            |             |             |   |             |             |             |   |             |             |             |   |             |            |             |   |             |             |             |   |             |             |             |   |             |            |             |   |             |             |             |   |             |             |             |   |             |             |             |   |             |             |             |   |             |             |             |   |             |             |             |   |             |            |             |   |             |             |             |   |             |             |            |   |             |             |             |   |             |            |             |   |            |            |            |   |            |            |            |   |            |            |            |
| C                                                                                                                                                                                                                                                                                                                                                                                                                                                                                                                                                                                                                                                                                                                                                                                                                                                                                                                                                                                                                                                                                                                                                                                                                                                                                                                                                                                                                                                                                                                                                                                                                                                                                                                                                                                                                                                                                                                                                                                                                                                                                                                                                                                                                                                                                                                                               | -2.97541600 | 1.10145400                                                                         | 0.07647200                                                                           |             |   |            |            |             |   |            |             |             |   |            |             |             |   |            |             |             |   |            |             |             |   |            |            |             |   |            |             |             |   |            |             |            |   |            |             |             |   |            |            |             |   |            |             |             |   |            |             |             |   |             |             |             |   |             |             |             |   |             |             |            |   |             |             |             |   |             |             |             |   |             |             |             |   |             |             |             |   |             |             |            |   |             |             |             |   |             |            |             |   |             |             |             |   |             |            |             |   |             |            |             |   |             |             |             |                                                                                                                                                                                                                                                                                                                                                                                                                                                                                                                                                                                                                                                                                                                                                                                                                                                                                                                                                                                                                                                                                                                                                                                                                                                                                                                                                                                                                                                                                                                                                                                                                                                                                                                                                                                                                                                                                                                                                                                                                                                                                                                                                                                                                                                                                                                                                                                                                                                                                                                     |            |             |            |                                                                                                                                                                                                                                                                                                                                                                                                                                                                                                                                                                                                                                                                                                                                                                                                                                                                                                                                                                                                                                                                                                                                                                                                                                                                                                                                                                                                                                                                                                                                                                                                                                                                                                                                                                                                                                                                                                                                                                                                                                                                                                                                                                                                                                                                                                                                                                                                                                                                                                                                                                                               |   |            |             |             |   |            |             |             |   |            |             |             |   |            |             |             |   |            |             |             |   |            |             |             |   |            |             |            |   |            |             |            |   |            |             |             |   |            |             |             |   |            |             |             |   |             |             |             |   |             |             |             |   |             |             |             |   |             |            |             |   |             |             |             |   |             |             |             |   |             |             |             |   |             |            |             |   |             |             |             |   |             |             |             |   |             |             |             |   |             |             |             |   |             |            |             |   |             |             |             |   |             |             |            |   |             |            |             |   |             |             |             |   |             |            |            |                                                                                                                                                                                                                                                                                                                                                                                                                                                                                                                                                                                                                                                                                                                                                                                                                                                                                                                                                                                                                                                                                                                                                                                                                                                                                                                                                                                                                                                                                                                                                                                                                                                                                                                                                                                                                                                                                                                                                                                                                                                                                                                                                                                                                                                                                                                                                                                                                                                                                                                        |            |            |            |             |            |            |            |                                                                                                                                                                                                                                                                                                                                                                                                                                                                                                                                                                                                                                                                                                                                                                                                                                                                                                                                                                                                                                                                                                                                                                                                                                                                                                                                                                                                                                                                                                                                                                                                                                                                                                                                                                                                                                                                                                                                                                                                                                                                                                                                                                                                                                                                                                                                                                                                                                                                                                                                                                                             |   |            |             |             |   |            |             |             |   |            |             |             |   |            |             |             |   |            |             |             |   |            |             |             |   |            |             |            |   |            |             |            |   |            |            |             |   |            |             |             |   |            |             |             |   |             |             |             |   |             |             |             |   |             |            |             |   |             |             |             |   |             |             |             |   |             |            |             |   |             |             |             |   |             |             |             |   |             |             |             |   |             |             |             |   |             |             |             |   |             |             |             |   |             |            |             |   |             |             |             |   |             |             |            |   |             |             |             |   |             |            |             |   |            |            |            |   |            |            |            |   |            |            |            |
| C                                                                                                                                                                                                                                                                                                                                                                                                                                                                                                                                                                                                                                                                                                                                                                                                                                                                                                                                                                                                                                                                                                                                                                                                                                                                                                                                                                                                                                                                                                                                                                                                                                                                                                                                                                                                                                                                                                                                                                                                                                                                                                                                                                                                                                                                                                                                               | -3.88971000 | -1.52245300                                                                        | -0.01080100                                                                          |             |   |            |            |             |   |            |             |             |   |            |             |             |   |            |             |             |   |            |             |             |   |            |            |             |   |            |             |             |   |            |             |            |   |            |             |             |   |            |            |             |   |            |             |             |   |            |             |             |   |             |             |             |   |             |             |             |   |             |             |            |   |             |             |             |   |             |             |             |   |             |             |             |   |             |             |             |   |             |             |            |   |             |             |             |   |             |            |             |   |             |             |             |   |             |            |             |   |             |            |             |   |             |             |             |                                                                                                                                                                                                                                                                                                                                                                                                                                                                                                                                                                                                                                                                                                                                                                                                                                                                                                                                                                                                                                                                                                                                                                                                                                                                                                                                                                                                                                                                                                                                                                                                                                                                                                                                                                                                                                                                                                                                                                                                                                                                                                                                                                                                                                                                                                                                                                                                                                                                                                                     |            |             |            |                                                                                                                                                                                                                                                                                                                                                                                                                                                                                                                                                                                                                                                                                                                                                                                                                                                                                                                                                                                                                                                                                                                                                                                                                                                                                                                                                                                                                                                                                                                                                                                                                                                                                                                                                                                                                                                                                                                                                                                                                                                                                                                                                                                                                                                                                                                                                                                                                                                                                                                                                                                               |   |            |             |             |   |            |             |             |   |            |             |             |   |            |             |             |   |            |             |             |   |            |             |             |   |            |             |            |   |            |             |            |   |            |             |             |   |            |             |             |   |            |             |             |   |             |             |             |   |             |             |             |   |             |             |             |   |             |            |             |   |             |             |             |   |             |             |             |   |             |             |             |   |             |            |             |   |             |             |             |   |             |             |             |   |             |             |             |   |             |             |             |   |             |            |             |   |             |             |             |   |             |             |            |   |             |            |             |   |             |             |             |   |             |            |            |                                                                                                                                                                                                                                                                                                                                                                                                                                                                                                                                                                                                                                                                                                                                                                                                                                                                                                                                                                                                                                                                                                                                                                                                                                                                                                                                                                                                                                                                                                                                                                                                                                                                                                                                                                                                                                                                                                                                                                                                                                                                                                                                                                                                                                                                                                                                                                                                                                                                                                                        |            |            |            |             |            |            |            |                                                                                                                                                                                                                                                                                                                                                                                                                                                                                                                                                                                                                                                                                                                                                                                                                                                                                                                                                                                                                                                                                                                                                                                                                                                                                                                                                                                                                                                                                                                                                                                                                                                                                                                                                                                                                                                                                                                                                                                                                                                                                                                                                                                                                                                                                                                                                                                                                                                                                                                                                                                             |   |            |             |             |   |            |             |             |   |            |             |             |   |            |             |             |   |            |             |             |   |            |             |             |   |            |             |            |   |            |             |            |   |            |            |             |   |            |             |             |   |            |             |             |   |             |             |             |   |             |             |             |   |             |            |             |   |             |             |             |   |             |             |             |   |             |            |             |   |             |             |             |   |             |             |             |   |             |             |             |   |             |             |             |   |             |             |             |   |             |             |             |   |             |            |             |   |             |             |             |   |             |             |            |   |             |             |             |   |             |            |             |   |            |            |            |   |            |            |            |   |            |            |            |
| H                                                                                                                                                                                                                                                                                                                                                                                                                                                                                                                                                                                                                                                                                                                                                                                                                                                                                                                                                                                                                                                                                                                                                                                                                                                                                                                                                                                                                                                                                                                                                                                                                                                                                                                                                                                                                                                                                                                                                                                                                                                                                                                                                                                                                                                                                                                                               | -1.86194100 | -2.14480200                                                                        | -0.11482000                                                                          |             |   |            |            |             |   |            |             |             |   |            |             |             |   |            |             |             |   |            |             |             |   |            |            |             |   |            |             |             |   |            |             |            |   |            |             |             |   |            |            |             |   |            |             |             |   |            |             |             |   |             |             |             |   |             |             |             |   |             |             |            |   |             |             |             |   |             |             |             |   |             |             |             |   |             |             |             |   |             |             |            |   |             |             |             |   |             |            |             |   |             |             |             |   |             |            |             |   |             |            |             |   |             |             |             |                                                                                                                                                                                                                                                                                                                                                                                                                                                                                                                                                                                                                                                                                                                                                                                                                                                                                                                                                                                                                                                                                                                                                                                                                                                                                                                                                                                                                                                                                                                                                                                                                                                                                                                                                                                                                                                                                                                                                                                                                                                                                                                                                                                                                                                                                                                                                                                                                                                                                                                     |            |             |            |                                                                                                                                                                                                                                                                                                                                                                                                                                                                                                                                                                                                                                                                                                                                                                                                                                                                                                                                                                                                                                                                                                                                                                                                                                                                                                                                                                                                                                                                                                                                                                                                                                                                                                                                                                                                                                                                                                                                                                                                                                                                                                                                                                                                                                                                                                                                                                                                                                                                                                                                                                                               |   |            |             |             |   |            |             |             |   |            |             |             |   |            |             |             |   |            |             |             |   |            |             |             |   |            |             |            |   |            |             |            |   |            |             |             |   |            |             |             |   |            |             |             |   |             |             |             |   |             |             |             |   |             |             |             |   |             |            |             |   |             |             |             |   |             |             |             |   |             |             |             |   |             |            |             |   |             |             |             |   |             |             |             |   |             |             |             |   |             |             |             |   |             |            |             |   |             |             |             |   |             |             |            |   |             |            |             |   |             |             |             |   |             |            |            |                                                                                                                                                                                                                                                                                                                                                                                                                                                                                                                                                                                                                                                                                                                                                                                                                                                                                                                                                                                                                                                                                                                                                                                                                                                                                                                                                                                                                                                                                                                                                                                                                                                                                                                                                                                                                                                                                                                                                                                                                                                                                                                                                                                                                                                                                                                                                                                                                                                                                                                        |            |            |            |             |            |            |            |                                                                                                                                                                                                                                                                                                                                                                                                                                                                                                                                                                                                                                                                                                                                                                                                                                                                                                                                                                                                                                                                                                                                                                                                                                                                                                                                                                                                                                                                                                                                                                                                                                                                                                                                                                                                                                                                                                                                                                                                                                                                                                                                                                                                                                                                                                                                                                                                                                                                                                                                                                                             |   |            |             |             |   |            |             |             |   |            |             |             |   |            |             |             |   |            |             |             |   |            |             |             |   |            |             |            |   |            |             |            |   |            |            |             |   |            |             |             |   |            |             |             |   |             |             |             |   |             |             |             |   |             |            |             |   |             |             |             |   |             |             |             |   |             |            |             |   |             |             |             |   |             |             |             |   |             |             |             |   |             |             |             |   |             |             |             |   |             |             |             |   |             |            |             |   |             |             |             |   |             |             |            |   |             |             |             |   |             |            |             |   |            |            |            |   |            |            |            |   |            |            |            |
| C                                                                                                                                                                                                                                                                                                                                                                                                                                                                                                                                                                                                                                                                                                                                                                                                                                                                                                                                                                                                                                                                                                                                                                                                                                                                                                                                                                                                                                                                                                                                                                                                                                                                                                                                                                                                                                                                                                                                                                                                                                                                                                                                                                                                                                                                                                                                               | -4.31911000 | 0.82777200                                                                         | 0.11484500                                                                           |             |   |            |            |             |   |            |             |             |   |            |             |             |   |            |             |             |   |            |             |             |   |            |            |             |   |            |             |             |   |            |             |            |   |            |             |             |   |            |            |             |   |            |             |             |   |            |             |             |   |             |             |             |   |             |             |             |   |             |             |            |   |             |             |             |   |             |             |             |   |             |             |             |   |             |             |             |   |             |             |            |   |             |             |             |   |             |            |             |   |             |             |             |   |             |            |             |   |             |            |             |   |             |             |             |                                                                                                                                                                                                                                                                                                                                                                                                                                                                                                                                                                                                                                                                                                                                                                                                                                                                                                                                                                                                                                                                                                                                                                                                                                                                                                                                                                                                                                                                                                                                                                                                                                                                                                                                                                                                                                                                                                                                                                                                                                                                                                                                                                                                                                                                                                                                                                                                                                                                                                                     |            |             |            |                                                                                                                                                                                                                                                                                                                                                                                                                                                                                                                                                                                                                                                                                                                                                                                                                                                                                                                                                                                                                                                                                                                                                                                                                                                                                                                                                                                                                                                                                                                                                                                                                                                                                                                                                                                                                                                                                                                                                                                                                                                                                                                                                                                                                                                                                                                                                                                                                                                                                                                                                                                               |   |            |             |             |   |            |             |             |   |            |             |             |   |            |             |             |   |            |             |             |   |            |             |             |   |            |             |            |   |            |             |            |   |            |             |             |   |            |             |             |   |            |             |             |   |             |             |             |   |             |             |             |   |             |             |             |   |             |            |             |   |             |             |             |   |             |             |             |   |             |             |             |   |             |            |             |   |             |             |             |   |             |             |             |   |             |             |             |   |             |             |             |   |             |            |             |   |             |             |             |   |             |             |            |   |             |            |             |   |             |             |             |   |             |            |            |                                                                                                                                                                                                                                                                                                                                                                                                                                                                                                                                                                                                                                                                                                                                                                                                                                                                                                                                                                                                                                                                                                                                                                                                                                                                                                                                                                                                                                                                                                                                                                                                                                                                                                                                                                                                                                                                                                                                                                                                                                                                                                                                                                                                                                                                                                                                                                                                                                                                                                                        |            |            |            |             |            |            |            |                                                                                                                                                                                                                                                                                                                                                                                                                                                                                                                                                                                                                                                                                                                                                                                                                                                                                                                                                                                                                                                                                                                                                                                                                                                                                                                                                                                                                                                                                                                                                                                                                                                                                                                                                                                                                                                                                                                                                                                                                                                                                                                                                                                                                                                                                                                                                                                                                                                                                                                                                                                             |   |            |             |             |   |            |             |             |   |            |             |             |   |            |             |             |   |            |             |             |   |            |             |             |   |            |             |            |   |            |             |            |   |            |            |             |   |            |             |             |   |            |             |             |   |             |             |             |   |             |             |             |   |             |            |             |   |             |             |             |   |             |             |             |   |             |            |             |   |             |             |             |   |             |             |             |   |             |             |             |   |             |             |             |   |             |             |             |   |             |             |             |   |             |            |             |   |             |             |             |   |             |             |            |   |             |             |             |   |             |            |             |   |            |            |            |   |            |            |            |   |            |            |            |
| H                                                                                                                                                                                                                                                                                                                                                                                                                                                                                                                                                                                                                                                                                                                                                                                                                                                                                                                                                                                                                                                                                                                                                                                                                                                                                                                                                                                                                                                                                                                                                                                                                                                                                                                                                                                                                                                                                                                                                                                                                                                                                                                                                                                                                                                                                                                                               | -2.65468300 | 2.13579500                                                                         | 0.12126500                                                                           |             |   |            |            |             |   |            |             |             |   |            |             |             |   |            |             |             |   |            |             |             |   |            |            |             |   |            |             |             |   |            |             |            |   |            |             |             |   |            |            |             |   |            |             |             |   |            |             |             |   |             |             |             |   |             |             |             |   |             |             |            |   |             |             |             |   |             |             |             |   |             |             |             |   |             |             |             |   |             |             |            |   |             |             |             |   |             |            |             |   |             |             |             |   |             |            |             |   |             |            |             |   |             |             |             |                                                                                                                                                                                                                                                                                                                                                                                                                                                                                                                                                                                                                                                                                                                                                                                                                                                                                                                                                                                                                                                                                                                                                                                                                                                                                                                                                                                                                                                                                                                                                                                                                                                                                                                                                                                                                                                                                                                                                                                                                                                                                                                                                                                                                                                                                                                                                                                                                                                                                                                     |            |             |            |                                                                                                                                                                                                                                                                                                                                                                                                                                                                                                                                                                                                                                                                                                                                                                                                                                                                                                                                                                                                                                                                                                                                                                                                                                                                                                                                                                                                                                                                                                                                                                                                                                                                                                                                                                                                                                                                                                                                                                                                                                                                                                                                                                                                                                                                                                                                                                                                                                                                                                                                                                                               |   |            |             |             |   |            |             |             |   |            |             |             |   |            |             |             |   |            |             |             |   |            |             |             |   |            |             |            |   |            |             |            |   |            |             |             |   |            |             |             |   |            |             |             |   |             |             |             |   |             |             |             |   |             |             |             |   |             |            |             |   |             |             |             |   |             |             |             |   |             |             |             |   |             |            |             |   |             |             |             |   |             |             |             |   |             |             |             |   |             |             |             |   |             |            |             |   |             |             |             |   |             |             |            |   |             |            |             |   |             |             |             |   |             |            |            |                                                                                                                                                                                                                                                                                                                                                                                                                                                                                                                                                                                                                                                                                                                                                                                                                                                                                                                                                                                                                                                                                                                                                                                                                                                                                                                                                                                                                                                                                                                                                                                                                                                                                                                                                                                                                                                                                                                                                                                                                                                                                                                                                                                                                                                                                                                                                                                                                                                                                                                        |            |            |            |             |            |            |            |                                                                                                                                                                                                                                                                                                                                                                                                                                                                                                                                                                                                                                                                                                                                                                                                                                                                                                                                                                                                                                                                                                                                                                                                                                                                                                                                                                                                                                                                                                                                                                                                                                                                                                                                                                                                                                                                                                                                                                                                                                                                                                                                                                                                                                                                                                                                                                                                                                                                                                                                                                                             |   |            |             |             |   |            |             |             |   |            |             |             |   |            |             |             |   |            |             |             |   |            |             |             |   |            |             |            |   |            |             |            |   |            |            |             |   |            |             |             |   |            |             |             |   |             |             |             |   |             |             |             |   |             |            |             |   |             |             |             |   |             |             |             |   |             |            |             |   |             |             |             |   |             |             |             |   |             |             |             |   |             |             |             |   |             |             |             |   |             |             |             |   |             |            |             |   |             |             |             |   |             |             |            |   |             |             |             |   |             |            |             |   |            |            |            |   |            |            |            |   |            |            |            |
| H                                                                                                                                                                                                                                                                                                                                                                                                                                                                                                                                                                                                                                                                                                                                                                                                                                                                                                                                                                                                                                                                                                                                                                                                                                                                                                                                                                                                                                                                                                                                                                                                                                                                                                                                                                                                                                                                                                                                                                                                                                                                                                                                                                                                                                                                                                                                               | -4.83217200 | -0.48243700                                                                        | 0.07202200                                                                           |             |   |            |            |             |   |            |             |             |   |            |             |             |   |            |             |             |   |            |             |             |   |            |            |             |   |            |             |             |   |            |             |            |   |            |             |             |   |            |            |             |   |            |             |             |   |            |             |             |   |             |             |             |   |             |             |             |   |             |             |            |   |             |             |             |   |             |             |             |   |             |             |             |   |             |             |             |   |             |             |            |   |             |             |             |   |             |            |             |   |             |             |             |   |             |            |             |   |             |            |             |   |             |             |             |                                                                                                                                                                                                                                                                                                                                                                                                                                                                                                                                                                                                                                                                                                                                                                                                                                                                                                                                                                                                                                                                                                                                                                                                                                                                                                                                                                                                                                                                                                                                                                                                                                                                                                                                                                                                                                                                                                                                                                                                                                                                                                                                                                                                                                                                                                                                                                                                                                                                                                                     |            |             |            |                                                                                                                                                                                                                                                                                                                                                                                                                                                                                                                                                                                                                                                                                                                                                                                                                                                                                                                                                                                                                                                                                                                                                                                                                                                                                                                                                                                                                                                                                                                                                                                                                                                                                                                                                                                                                                                                                                                                                                                                                                                                                                                                                                                                                                                                                                                                                                                                                                                                                                                                                                                               |   |            |             |             |   |            |             |             |   |            |             |             |   |            |             |             |   |            |             |             |   |            |             |             |   |            |             |            |   |            |             |            |   |            |             |             |   |            |             |             |   |            |             |             |   |             |             |             |   |             |             |             |   |             |             |             |   |             |            |             |   |             |             |             |   |             |             |             |   |             |             |             |   |             |            |             |   |             |             |             |   |             |             |             |   |             |             |             |   |             |             |             |   |             |            |             |   |             |             |             |   |             |             |            |   |             |            |             |   |             |             |             |   |             |            |            |                                                                                                                                                                                                                                                                                                                                                                                                                                                                                                                                                                                                                                                                                                                                                                                                                                                                                                                                                                                                                                                                                                                                                                                                                                                                                                                                                                                                                                                                                                                                                                                                                                                                                                                                                                                                                                                                                                                                                                                                                                                                                                                                                                                                                                                                                                                                                                                                                                                                                                                        |            |            |            |             |            |            |            |                                                                                                                                                                                                                                                                                                                                                                                                                                                                                                                                                                                                                                                                                                                                                                                                                                                                                                                                                                                                                                                                                                                                                                                                                                                                                                                                                                                                                                                                                                                                                                                                                                                                                                                                                                                                                                                                                                                                                                                                                                                                                                                                                                                                                                                                                                                                                                                                                                                                                                                                                                                             |   |            |             |             |   |            |             |             |   |            |             |             |   |            |             |             |   |            |             |             |   |            |             |             |   |            |             |            |   |            |             |            |   |            |            |             |   |            |             |             |   |            |             |             |   |             |             |             |   |             |             |             |   |             |            |             |   |             |             |             |   |             |             |             |   |             |            |             |   |             |             |             |   |             |             |             |   |             |             |             |   |             |             |             |   |             |             |             |   |             |             |             |   |             |            |             |   |             |             |             |   |             |             |            |   |             |             |             |   |             |            |             |   |            |            |            |   |            |            |            |   |            |            |            |
| H                                                                                                                                                                                                                                                                                                                                                                                                                                                                                                                                                                                                                                                                                                                                                                                                                                                                                                                                                                                                                                                                                                                                                                                                                                                                                                                                                                                                                                                                                                                                                                                                                                                                                                                                                                                                                                                                                                                                                                                                                                                                                                                                                                                                                                                                                                                                               | -4.23971200 | -2.55192600                                                                        | -0.04255100                                                                          |             |   |            |            |             |   |            |             |             |   |            |             |             |   |            |             |             |   |            |             |             |   |            |            |             |   |            |             |             |   |            |             |            |   |            |             |             |   |            |            |             |   |            |             |             |   |            |             |             |   |             |             |             |   |             |             |             |   |             |             |            |   |             |             |             |   |             |             |             |   |             |             |             |   |             |             |             |   |             |             |            |   |             |             |             |   |             |            |             |   |             |             |             |   |             |            |             |   |             |            |             |   |             |             |             |                                                                                                                                                                                                                                                                                                                                                                                                                                                                                                                                                                                                                                                                                                                                                                                                                                                                                                                                                                                                                                                                                                                                                                                                                                                                                                                                                                                                                                                                                                                                                                                                                                                                                                                                                                                                                                                                                                                                                                                                                                                                                                                                                                                                                                                                                                                                                                                                                                                                                                                     |            |             |            |                                                                                                                                                                                                                                                                                                                                                                                                                                                                                                                                                                                                                                                                                                                                                                                                                                                                                                                                                                                                                                                                                                                                                                                                                                                                                                                                                                                                                                                                                                                                                                                                                                                                                                                                                                                                                                                                                                                                                                                                                                                                                                                                                                                                                                                                                                                                                                                                                                                                                                                                                                                               |   |            |             |             |   |            |             |             |   |            |             |             |   |            |             |             |   |            |             |             |   |            |             |             |   |            |             |            |   |            |             |            |   |            |             |             |   |            |             |             |   |            |             |             |   |             |             |             |   |             |             |             |   |             |             |             |   |             |            |             |   |             |             |             |   |             |             |             |   |             |             |             |   |             |            |             |   |             |             |             |   |             |             |             |   |             |             |             |   |             |             |             |   |             |            |             |   |             |             |             |   |             |             |            |   |             |            |             |   |             |             |             |   |             |            |            |                                                                                                                                                                                                                                                                                                                                                                                                                                                                                                                                                                                                                                                                                                                                                                                                                                                                                                                                                                                                                                                                                                                                                                                                                                                                                                                                                                                                                                                                                                                                                                                                                                                                                                                                                                                                                                                                                                                                                                                                                                                                                                                                                                                                                                                                                                                                                                                                                                                                                                                        |            |            |            |             |            |            |            |                                                                                                                                                                                                                                                                                                                                                                                                                                                                                                                                                                                                                                                                                                                                                                                                                                                                                                                                                                                                                                                                                                                                                                                                                                                                                                                                                                                                                                                                                                                                                                                                                                                                                                                                                                                                                                                                                                                                                                                                                                                                                                                                                                                                                                                                                                                                                                                                                                                                                                                                                                                             |   |            |             |             |   |            |             |             |   |            |             |             |   |            |             |             |   |            |             |             |   |            |             |             |   |            |             |            |   |            |             |            |   |            |            |             |   |            |             |             |   |            |             |             |   |             |             |             |   |             |             |             |   |             |            |             |   |             |             |             |   |             |             |             |   |             |            |             |   |             |             |             |   |             |             |             |   |             |             |             |   |             |             |             |   |             |             |             |   |             |             |             |   |             |            |             |   |             |             |             |   |             |             |            |   |             |             |             |   |             |            |             |   |            |            |            |   |            |            |            |   |            |            |            |
| H                                                                                                                                                                                                                                                                                                                                                                                                                                                                                                                                                                                                                                                                                                                                                                                                                                                                                                                                                                                                                                                                                                                                                                                                                                                                                                                                                                                                                                                                                                                                                                                                                                                                                                                                                                                                                                                                                                                                                                                                                                                                                                                                                                                                                                                                                                                                               | -5.00980900 | 1.66506600                                                                         | 0.18430800                                                                           |             |   |            |            |             |   |            |             |             |   |            |             |             |   |            |             |             |   |            |             |             |   |            |            |             |   |            |             |             |   |            |             |            |   |            |             |             |   |            |            |             |   |            |             |             |   |            |             |             |   |             |             |             |   |             |             |             |   |             |             |            |   |             |             |             |   |             |             |             |   |             |             |             |   |             |             |             |   |             |             |            |   |             |             |             |   |             |            |             |   |             |             |             |   |             |            |             |   |             |            |             |   |             |             |             |                                                                                                                                                                                                                                                                                                                                                                                                                                                                                                                                                                                                                                                                                                                                                                                                                                                                                                                                                                                                                                                                                                                                                                                                                                                                                                                                                                                                                                                                                                                                                                                                                                                                                                                                                                                                                                                                                                                                                                                                                                                                                                                                                                                                                                                                                                                                                                                                                                                                                                                     |            |             |            |                                                                                                                                                                                                                                                                                                                                                                                                                                                                                                                                                                                                                                                                                                                                                                                                                                                                                                                                                                                                                                                                                                                                                                                                                                                                                                                                                                                                                                                                                                                                                                                                                                                                                                                                                                                                                                                                                                                                                                                                                                                                                                                                                                                                                                                                                                                                                                                                                                                                                                                                                                                               |   |            |             |             |   |            |             |             |   |            |             |             |   |            |             |             |   |            |             |             |   |            |             |             |   |            |             |            |   |            |             |            |   |            |             |             |   |            |             |             |   |            |             |             |   |             |             |             |   |             |             |             |   |             |             |             |   |             |            |             |   |             |             |             |   |             |             |             |   |             |             |             |   |             |            |             |   |             |             |             |   |             |             |             |   |             |             |             |   |             |             |             |   |             |            |             |   |             |             |             |   |             |             |            |   |             |            |             |   |             |             |             |   |             |            |            |                                                                                                                                                                                                                                                                                                                                                                                                                                                                                                                                                                                                                                                                                                                                                                                                                                                                                                                                                                                                                                                                                                                                                                                                                                                                                                                                                                                                                                                                                                                                                                                                                                                                                                                                                                                                                                                                                                                                                                                                                                                                                                                                                                                                                                                                                                                                                                                                                                                                                                                        |            |            |            |             |            |            |            |                                                                                                                                                                                                                                                                                                                                                                                                                                                                                                                                                                                                                                                                                                                                                                                                                                                                                                                                                                                                                                                                                                                                                                                                                                                                                                                                                                                                                                                                                                                                                                                                                                                                                                                                                                                                                                                                                                                                                                                                                                                                                                                                                                                                                                                                                                                                                                                                                                                                                                                                                                                             |   |            |             |             |   |            |             |             |   |            |             |             |   |            |             |             |   |            |             |             |   |            |             |             |   |            |             |            |   |            |             |            |   |            |            |             |   |            |             |             |   |            |             |             |   |             |             |             |   |             |             |             |   |             |            |             |   |             |             |             |   |             |             |             |   |             |            |             |   |             |             |             |   |             |             |             |   |             |             |             |   |             |             |             |   |             |             |             |   |             |             |             |   |             |            |             |   |             |             |             |   |             |             |            |   |             |             |             |   |             |            |             |   |            |            |            |   |            |            |            |   |            |            |            |
| H                                                                                                                                                                                                                                                                                                                                                                                                                                                                                                                                                                                                                                                                                                                                                                                                                                                                                                                                                                                                                                                                                                                                                                                                                                                                                                                                                                                                                                                                                                                                                                                                                                                                                                                                                                                                                                                                                                                                                                                                                                                                                                                                                                                                                                                                                                                                               | -5.89594300 | -0.67841000                                                                        | 0.10524700                                                                           |             |   |            |            |             |   |            |             |             |   |            |             |             |   |            |             |             |   |            |             |             |   |            |            |             |   |            |             |             |   |            |             |            |   |            |             |             |   |            |            |             |   |            |             |             |   |            |             |             |   |             |             |             |   |             |             |             |   |             |             |            |   |             |             |             |   |             |             |             |   |             |             |             |   |             |             |             |   |             |             |            |   |             |             |             |   |             |            |             |   |             |             |             |   |             |            |             |   |             |            |             |   |             |             |             |                                                                                                                                                                                                                                                                                                                                                                                                                                                                                                                                                                                                                                                                                                                                                                                                                                                                                                                                                                                                                                                                                                                                                                                                                                                                                                                                                                                                                                                                                                                                                                                                                                                                                                                                                                                                                                                                                                                                                                                                                                                                                                                                                                                                                                                                                                                                                                                                                                                                                                                     |            |             |            |                                                                                                                                                                                                                                                                                                                                                                                                                                                                                                                                                                                                                                                                                                                                                                                                                                                                                                                                                                                                                                                                                                                                                                                                                                                                                                                                                                                                                                                                                                                                                                                                                                                                                                                                                                                                                                                                                                                                                                                                                                                                                                                                                                                                                                                                                                                                                                                                                                                                                                                                                                                               |   |            |             |             |   |            |             |             |   |            |             |             |   |            |             |             |   |            |             |             |   |            |             |             |   |            |             |            |   |            |             |            |   |            |             |             |   |            |             |             |   |            |             |             |   |             |             |             |   |             |             |             |   |             |             |             |   |             |            |             |   |             |             |             |   |             |             |             |   |             |             |             |   |             |            |             |   |             |             |             |   |             |             |             |   |             |             |             |   |             |             |             |   |             |            |             |   |             |             |             |   |             |             |            |   |             |            |             |   |             |             |             |   |             |            |            |                                                                                                                                                                                                                                                                                                                                                                                                                                                                                                                                                                                                                                                                                                                                                                                                                                                                                                                                                                                                                                                                                                                                                                                                                                                                                                                                                                                                                                                                                                                                                                                                                                                                                                                                                                                                                                                                                                                                                                                                                                                                                                                                                                                                                                                                                                                                                                                                                                                                                                                        |            |            |            |             |            |            |            |                                                                                                                                                                                                                                                                                                                                                                                                                                                                                                                                                                                                                                                                                                                                                                                                                                                                                                                                                                                                                                                                                                                                                                                                                                                                                                                                                                                                                                                                                                                                                                                                                                                                                                                                                                                                                                                                                                                                                                                                                                                                                                                                                                                                                                                                                                                                                                                                                                                                                                                                                                                             |   |            |             |             |   |            |             |             |   |            |             |             |   |            |             |             |   |            |             |             |   |            |             |             |   |            |             |            |   |            |             |            |   |            |            |             |   |            |             |             |   |            |             |             |   |             |             |             |   |             |             |             |   |             |            |             |   |             |             |             |   |             |             |             |   |             |            |             |   |             |             |             |   |             |             |             |   |             |             |             |   |             |             |             |   |             |             |             |   |             |             |             |   |             |            |             |   |             |             |             |   |             |             |            |   |             |             |             |   |             |            |             |   |            |            |            |   |            |            |            |   |            |            |            |
| C                                                                                                                                                                                                                                                                                                                                                                                                                                                                                                                                                                                                                                                                                                                                                                                                                                                                                                                                                                                                                                                                                                                                                                                                                                                                                                                                                                                                                                                                                                                                                                                                                                                                                                                                                                                                                                                                                                                                                                                                                                                                                                                                                                                                                                                                                                                                               | 0.04733500  | 1.57596900                                                                         | -0.07373100                                                                          |             |   |            |            |             |   |            |             |             |   |            |             |             |   |            |             |             |   |            |             |             |   |            |            |             |   |            |             |             |   |            |             |            |   |            |             |             |   |            |            |             |   |            |             |             |   |            |             |             |   |             |             |             |   |             |             |             |   |             |             |            |   |             |             |             |   |             |             |             |   |             |             |             |   |             |             |             |   |             |             |            |   |             |             |             |   |             |            |             |   |             |             |             |   |             |            |             |   |             |            |             |   |             |             |             |                                                                                                                                                                                                                                                                                                                                                                                                                                                                                                                                                                                                                                                                                                                                                                                                                                                                                                                                                                                                                                                                                                                                                                                                                                                                                                                                                                                                                                                                                                                                                                                                                                                                                                                                                                                                                                                                                                                                                                                                                                                                                                                                                                                                                                                                                                                                                                                                                                                                                                                     |            |             |            |                                                                                                                                                                                                                                                                                                                                                                                                                                                                                                                                                                                                                                                                                                                                                                                                                                                                                                                                                                                                                                                                                                                                                                                                                                                                                                                                                                                                                                                                                                                                                                                                                                                                                                                                                                                                                                                                                                                                                                                                                                                                                                                                                                                                                                                                                                                                                                                                                                                                                                                                                                                               |   |            |             |             |   |            |             |             |   |            |             |             |   |            |             |             |   |            |             |             |   |            |             |             |   |            |             |            |   |            |             |            |   |            |             |             |   |            |             |             |   |            |             |             |   |             |             |             |   |             |             |             |   |             |             |             |   |             |            |             |   |             |             |             |   |             |             |             |   |             |             |             |   |             |            |             |   |             |             |             |   |             |             |             |   |             |             |             |   |             |             |             |   |             |            |             |   |             |             |             |   |             |             |            |   |             |            |             |   |             |             |             |   |             |            |            |                                                                                                                                                                                                                                                                                                                                                                                                                                                                                                                                                                                                                                                                                                                                                                                                                                                                                                                                                                                                                                                                                                                                                                                                                                                                                                                                                                                                                                                                                                                                                                                                                                                                                                                                                                                                                                                                                                                                                                                                                                                                                                                                                                                                                                                                                                                                                                                                                                                                                                                        |            |            |            |             |            |            |            |                                                                                                                                                                                                                                                                                                                                                                                                                                                                                                                                                                                                                                                                                                                                                                                                                                                                                                                                                                                                                                                                                                                                                                                                                                                                                                                                                                                                                                                                                                                                                                                                                                                                                                                                                                                                                                                                                                                                                                                                                                                                                                                                                                                                                                                                                                                                                                                                                                                                                                                                                                                             |   |            |             |             |   |            |             |             |   |            |             |             |   |            |             |             |   |            |             |             |   |            |             |             |   |            |             |            |   |            |             |            |   |            |            |             |   |            |             |             |   |            |             |             |   |             |             |             |   |             |             |             |   |             |            |             |   |             |             |             |   |             |             |             |   |             |            |             |   |             |             |             |   |             |             |             |   |             |             |             |   |             |             |             |   |             |             |             |   |             |             |             |   |             |            |             |   |             |             |             |   |             |             |            |   |             |             |             |   |             |            |             |   |            |            |            |   |            |            |            |   |            |            |            |
| H                                                                                                                                                                                                                                                                                                                                                                                                                                                                                                                                                                                                                                                                                                                                                                                                                                                                                                                                                                                                                                                                                                                                                                                                                                                                                                                                                                                                                                                                                                                                                                                                                                                                                                                                                                                                                                                                                                                                                                                                                                                                                                                                                                                                                                                                                                                                               | -0.57585800 | 2.46333400                                                                         | -0.09077000                                                                          |             |   |            |            |             |   |            |             |             |   |            |             |             |   |            |             |             |   |            |             |             |   |            |            |             |   |            |             |             |   |            |             |            |   |            |             |             |   |            |            |             |   |            |             |             |   |            |             |             |   |             |             |             |   |             |             |             |   |             |             |            |   |             |             |             |   |             |             |             |   |             |             |             |   |             |             |             |   |             |             |            |   |             |             |             |   |             |            |             |   |             |             |             |   |             |            |             |   |             |            |             |   |             |             |             |                                                                                                                                                                                                                                                                                                                                                                                                                                                                                                                                                                                                                                                                                                                                                                                                                                                                                                                                                                                                                                                                                                                                                                                                                                                                                                                                                                                                                                                                                                                                                                                                                                                                                                                                                                                                                                                                                                                                                                                                                                                                                                                                                                                                                                                                                                                                                                                                                                                                                                                     |            |             |            |                                                                                                                                                                                                                                                                                                                                                                                                                                                                                                                                                                                                                                                                                                                                                                                                                                                                                                                                                                                                                                                                                                                                                                                                                                                                                                                                                                                                                                                                                                                                                                                                                                                                                                                                                                                                                                                                                                                                                                                                                                                                                                                                                                                                                                                                                                                                                                                                                                                                                                                                                                                               |   |            |             |             |   |            |             |             |   |            |             |             |   |            |             |             |   |            |             |             |   |            |             |             |   |            |             |            |   |            |             |            |   |            |             |             |   |            |             |             |   |            |             |             |   |             |             |             |   |             |             |             |   |             |             |             |   |             |            |             |   |             |             |             |   |             |             |             |   |             |             |             |   |             |            |             |   |             |             |             |   |             |             |             |   |             |             |             |   |             |             |             |   |             |            |             |   |             |             |             |   |             |             |            |   |             |            |             |   |             |             |             |   |             |            |            |                                                                                                                                                                                                                                                                                                                                                                                                                                                                                                                                                                                                                                                                                                                                                                                                                                                                                                                                                                                                                                                                                                                                                                                                                                                                                                                                                                                                                                                                                                                                                                                                                                                                                                                                                                                                                                                                                                                                                                                                                                                                                                                                                                                                                                                                                                                                                                                                                                                                                                                        |            |            |            |             |            |            |            |                                                                                                                                                                                                                                                                                                                                                                                                                                                                                                                                                                                                                                                                                                                                                                                                                                                                                                                                                                                                                                                                                                                                                                                                                                                                                                                                                                                                                                                                                                                                                                                                                                                                                                                                                                                                                                                                                                                                                                                                                                                                                                                                                                                                                                                                                                                                                                                                                                                                                                                                                                                             |   |            |             |             |   |            |             |             |   |            |             |             |   |            |             |             |   |            |             |             |   |            |             |             |   |            |             |            |   |            |             |            |   |            |            |             |   |            |             |             |   |            |             |             |   |             |             |             |   |             |             |             |   |             |            |             |   |             |             |             |   |             |             |             |   |             |            |             |   |             |             |             |   |             |             |             |   |             |             |             |   |             |             |             |   |             |             |             |   |             |             |             |   |             |            |             |   |             |             |             |   |             |             |            |   |             |             |             |   |             |            |             |   |            |            |            |   |            |            |            |   |            |            |            |
| C                                                                                                                                                                                                                                                                                                                                                                                                                                                                                                                                                                                                                                                                                                                                                                                                                                                                                                                                                                                                                                                                                                                                                                                                                                                                                                                                                                                                                                                                                                                                                                                                                                                                                                                                                                                                                                                                                                                                                                                                                                                                                                                                                                                                                                                                                                                                               | -0.62800200 | 0.30046300                                                                         | -0.06836800                                                                          |             |   |            |            |             |   |            |             |             |   |            |             |             |   |            |             |             |   |            |             |             |   |            |            |             |   |            |             |             |   |            |             |            |   |            |             |             |   |            |            |             |   |            |             |             |   |            |             |             |   |             |             |             |   |             |             |             |   |             |             |            |   |             |             |             |   |             |             |             |   |             |             |             |   |             |             |             |   |             |             |            |   |             |             |             |   |             |            |             |   |             |             |             |   |             |            |             |   |             |            |             |   |             |             |             |                                                                                                                                                                                                                                                                                                                                                                                                                                                                                                                                                                                                                                                                                                                                                                                                                                                                                                                                                                                                                                                                                                                                                                                                                                                                                                                                                                                                                                                                                                                                                                                                                                                                                                                                                                                                                                                                                                                                                                                                                                                                                                                                                                                                                                                                                                                                                                                                                                                                                                                     |            |             |            |                                                                                                                                                                                                                                                                                                                                                                                                                                                                                                                                                                                                                                                                                                                                                                                                                                                                                                                                                                                                                                                                                                                                                                                                                                                                                                                                                                                                                                                                                                                                                                                                                                                                                                                                                                                                                                                                                                                                                                                                                                                                                                                                                                                                                                                                                                                                                                                                                                                                                                                                                                                               |   |            |             |             |   |            |             |             |   |            |             |             |   |            |             |             |   |            |             |             |   |            |             |             |   |            |             |            |   |            |             |            |   |            |             |             |   |            |             |             |   |            |             |             |   |             |             |             |   |             |             |             |   |             |             |             |   |             |            |             |   |             |             |             |   |             |             |             |   |             |             |             |   |             |            |             |   |             |             |             |   |             |             |             |   |             |             |             |   |             |             |             |   |             |            |             |   |             |             |             |   |             |             |            |   |             |            |             |   |             |             |             |   |             |            |            |                                                                                                                                                                                                                                                                                                                                                                                                                                                                                                                                                                                                                                                                                                                                                                                                                                                                                                                                                                                                                                                                                                                                                                                                                                                                                                                                                                                                                                                                                                                                                                                                                                                                                                                                                                                                                                                                                                                                                                                                                                                                                                                                                                                                                                                                                                                                                                                                                                                                                                                        |            |            |            |             |            |            |            |                                                                                                                                                                                                                                                                                                                                                                                                                                                                                                                                                                                                                                                                                                                                                                                                                                                                                                                                                                                                                                                                                                                                                                                                                                                                                                                                                                                                                                                                                                                                                                                                                                                                                                                                                                                                                                                                                                                                                                                                                                                                                                                                                                                                                                                                                                                                                                                                                                                                                                                                                                                             |   |            |             |             |   |            |             |             |   |            |             |             |   |            |             |             |   |            |             |             |   |            |             |             |   |            |             |            |   |            |             |            |   |            |            |             |   |            |             |             |   |            |             |             |   |             |             |             |   |             |             |             |   |             |            |             |   |             |             |             |   |             |             |             |   |             |            |             |   |             |             |             |   |             |             |             |   |             |             |             |   |             |             |             |   |             |             |             |   |             |             |             |   |             |            |             |   |             |             |             |   |             |             |            |   |             |             |             |   |             |            |             |   |            |            |            |   |            |            |            |   |            |            |            |
| C                                                                                                                                                                                                                                                                                                                                                                                                                                                                                                                                                                                                                                                                                                                                                                                                                                                                                                                                                                                                                                                                                                                                                                                                                                                                                                                                                                                                                                                                                                                                                                                                                                                                                                                                                                                                                                                                                                                                                                                                                                                                                                                                                                                                                                                                                                                                               | 3.60507100  | 0.54267100                                                                         | -0.48046900                                                                          |             |   |            |            |             |   |            |             |             |   |            |             |             |   |            |             |             |   |            |             |             |   |            |            |             |   |            |             |             |   |            |             |            |   |            |             |             |   |            |            |             |   |            |             |             |   |            |             |             |   |             |             |             |   |             |             |             |   |             |             |            |   |             |             |             |   |             |             |             |   |             |             |             |   |             |             |             |   |             |             |            |   |             |             |             |   |             |            |             |   |             |             |             |   |             |            |             |   |             |            |             |   |             |             |             |                                                                                                                                                                                                                                                                                                                                                                                                                                                                                                                                                                                                                                                                                                                                                                                                                                                                                                                                                                                                                                                                                                                                                                                                                                                                                                                                                                                                                                                                                                                                                                                                                                                                                                                                                                                                                                                                                                                                                                                                                                                                                                                                                                                                                                                                                                                                                                                                                                                                                                                     |            |             |            |                                                                                                                                                                                                                                                                                                                                                                                                                                                                                                                                                                                                                                                                                                                                                                                                                                                                                                                                                                                                                                                                                                                                                                                                                                                                                                                                                                                                                                                                                                                                                                                                                                                                                                                                                                                                                                                                                                                                                                                                                                                                                                                                                                                                                                                                                                                                                                                                                                                                                                                                                                                               |   |            |             |             |   |            |             |             |   |            |             |             |   |            |             |             |   |            |             |             |   |            |             |             |   |            |             |            |   |            |             |            |   |            |             |             |   |            |             |             |   |            |             |             |   |             |             |             |   |             |             |             |   |             |             |             |   |             |            |             |   |             |             |             |   |             |             |             |   |             |             |             |   |             |            |             |   |             |             |             |   |             |             |             |   |             |             |             |   |             |             |             |   |             |            |             |   |             |             |             |   |             |             |            |   |             |            |             |   |             |             |             |   |             |            |            |                                                                                                                                                                                                                                                                                                                                                                                                                                                                                                                                                                                                                                                                                                                                                                                                                                                                                                                                                                                                                                                                                                                                                                                                                                                                                                                                                                                                                                                                                                                                                                                                                                                                                                                                                                                                                                                                                                                                                                                                                                                                                                                                                                                                                                                                                                                                                                                                                                                                                                                        |            |            |            |             |            |            |            |                                                                                                                                                                                                                                                                                                                                                                                                                                                                                                                                                                                                                                                                                                                                                                                                                                                                                                                                                                                                                                                                                                                                                                                                                                                                                                                                                                                                                                                                                                                                                                                                                                                                                                                                                                                                                                                                                                                                                                                                                                                                                                                                                                                                                                                                                                                                                                                                                                                                                                                                                                                             |   |            |             |             |   |            |             |             |   |            |             |             |   |            |             |             |   |            |             |             |   |            |             |             |   |            |             |            |   |            |             |            |   |            |            |             |   |            |             |             |   |            |             |             |   |             |             |             |   |             |             |             |   |             |            |             |   |             |             |             |   |             |             |             |   |             |            |             |   |             |             |             |   |             |             |             |   |             |             |             |   |             |             |             |   |             |             |             |   |             |             |             |   |             |            |             |   |             |             |             |   |             |             |            |   |             |             |             |   |             |            |             |   |            |            |            |   |            |            |            |   |            |            |            |
| C                                                                                                                                                                                                                                                                                                                                                                                                                                                                                                                                                                                                                                                                                                                                                                                                                                                                                                                                                                                                                                                                                                                                                                                                                                                                                                                                                                                                                                                                                                                                                                                                                                                                                                                                                                                                                                                                                                                                                                                                                                                                                                                                                                                                                                                                                                                                               | 2.21807300  | 0.46617200                                                                         | -0.44080100                                                                          |             |   |            |            |             |   |            |             |             |   |            |             |             |   |            |             |             |   |            |             |             |   |            |            |             |   |            |             |             |   |            |             |            |   |            |             |             |   |            |            |             |   |            |             |             |   |            |             |             |   |             |             |             |   |             |             |             |   |             |             |            |   |             |             |             |   |             |             |             |   |             |             |             |   |             |             |             |   |             |             |            |   |             |             |             |   |             |            |             |   |             |             |             |   |             |            |             |   |             |            |             |   |             |             |             |                                                                                                                                                                                                                                                                                                                                                                                                                                                                                                                                                                                                                                                                                                                                                                                                                                                                                                                                                                                                                                                                                                                                                                                                                                                                                                                                                                                                                                                                                                                                                                                                                                                                                                                                                                                                                                                                                                                                                                                                                                                                                                                                                                                                                                                                                                                                                                                                                                                                                                                     |            |             |            |                                                                                                                                                                                                                                                                                                                                                                                                                                                                                                                                                                                                                                                                                                                                                                                                                                                                                                                                                                                                                                                                                                                                                                                                                                                                                                                                                                                                                                                                                                                                                                                                                                                                                                                                                                                                                                                                                                                                                                                                                                                                                                                                                                                                                                                                                                                                                                                                                                                                                                                                                                                               |   |            |             |             |   |            |             |             |   |            |             |             |   |            |             |             |   |            |             |             |   |            |             |             |   |            |             |            |   |            |             |            |   |            |             |             |   |            |             |             |   |            |             |             |   |             |             |             |   |             |             |             |   |             |             |             |   |             |            |             |   |             |             |             |   |             |             |             |   |             |             |             |   |             |            |             |   |             |             |             |   |             |             |             |   |             |             |             |   |             |             |             |   |             |            |             |   |             |             |             |   |             |             |            |   |             |            |             |   |             |             |             |   |             |            |            |                                                                                                                                                                                                                                                                                                                                                                                                                                                                                                                                                                                                                                                                                                                                                                                                                                                                                                                                                                                                                                                                                                                                                                                                                                                                                                                                                                                                                                                                                                                                                                                                                                                                                                                                                                                                                                                                                                                                                                                                                                                                                                                                                                                                                                                                                                                                                                                                                                                                                                                        |            |            |            |             |            |            |            |                                                                                                                                                                                                                                                                                                                                                                                                                                                                                                                                                                                                                                                                                                                                                                                                                                                                                                                                                                                                                                                                                                                                                                                                                                                                                                                                                                                                                                                                                                                                                                                                                                                                                                                                                                                                                                                                                                                                                                                                                                                                                                                                                                                                                                                                                                                                                                                                                                                                                                                                                                                             |   |            |             |             |   |            |             |             |   |            |             |             |   |            |             |             |   |            |             |             |   |            |             |             |   |            |             |            |   |            |             |            |   |            |            |             |   |            |             |             |   |            |             |             |   |             |             |             |   |             |             |             |   |             |            |             |   |             |             |             |   |             |             |             |   |             |            |             |   |             |             |             |   |             |             |             |   |             |             |             |   |             |             |             |   |             |             |             |   |             |             |             |   |             |            |             |   |             |             |             |   |             |             |            |   |             |             |             |   |             |            |             |   |            |            |            |   |            |            |            |   |            |            |            |
| C                                                                                                                                                                                                                                                                                                                                                                                                                                                                                                                                                                                                                                                                                                                                                                                                                                                                                                                                                                                                                                                                                                                                                                                                                                                                                                                                                                                                                                                                                                                                                                                                                                                                                                                                                                                                                                                                                                                                                                                                                                                                                                                                                                                                                                                                                                                                               | 1.63077500  | -0.77562200                                                                        | -0.17683700                                                                          |             |   |            |            |             |   |            |             |             |   |            |             |             |   |            |             |             |   |            |             |             |   |            |            |             |   |            |             |             |   |            |             |            |   |            |             |             |   |            |            |             |   |            |             |             |   |            |             |             |   |             |             |             |   |             |             |             |   |             |             |            |   |             |             |             |   |             |             |             |   |             |             |             |   |             |             |             |   |             |             |            |   |             |             |             |   |             |            |             |   |             |             |             |   |             |            |             |   |             |            |             |   |             |             |             |                                                                                                                                                                                                                                                                                                                                                                                                                                                                                                                                                                                                                                                                                                                                                                                                                                                                                                                                                                                                                                                                                                                                                                                                                                                                                                                                                                                                                                                                                                                                                                                                                                                                                                                                                                                                                                                                                                                                                                                                                                                                                                                                                                                                                                                                                                                                                                                                                                                                                                                     |            |             |            |                                                                                                                                                                                                                                                                                                                                                                                                                                                                                                                                                                                                                                                                                                                                                                                                                                                                                                                                                                                                                                                                                                                                                                                                                                                                                                                                                                                                                                                                                                                                                                                                                                                                                                                                                                                                                                                                                                                                                                                                                                                                                                                                                                                                                                                                                                                                                                                                                                                                                                                                                                                               |   |            |             |             |   |            |             |             |   |            |             |             |   |            |             |             |   |            |             |             |   |            |             |             |   |            |             |            |   |            |             |            |   |            |             |             |   |            |             |             |   |            |             |             |   |             |             |             |   |             |             |             |   |             |             |             |   |             |            |             |   |             |             |             |   |             |             |             |   |             |             |             |   |             |            |             |   |             |             |             |   |             |             |             |   |             |             |             |   |             |             |             |   |             |            |             |   |             |             |             |   |             |             |            |   |             |            |             |   |             |             |             |   |             |            |            |                                                                                                                                                                                                                                                                                                                                                                                                                                                                                                                                                                                                                                                                                                                                                                                                                                                                                                                                                                                                                                                                                                                                                                                                                                                                                                                                                                                                                                                                                                                                                                                                                                                                                                                                                                                                                                                                                                                                                                                                                                                                                                                                                                                                                                                                                                                                                                                                                                                                                                                        |            |            |            |             |            |            |            |                                                                                                                                                                                                                                                                                                                                                                                                                                                                                                                                                                                                                                                                                                                                                                                                                                                                                                                                                                                                                                                                                                                                                                                                                                                                                                                                                                                                                                                                                                                                                                                                                                                                                                                                                                                                                                                                                                                                                                                                                                                                                                                                                                                                                                                                                                                                                                                                                                                                                                                                                                                             |   |            |             |             |   |            |             |             |   |            |             |             |   |            |             |             |   |            |             |             |   |            |             |             |   |            |             |            |   |            |             |            |   |            |            |             |   |            |             |             |   |            |             |             |   |             |             |             |   |             |             |             |   |             |            |             |   |             |             |             |   |             |             |             |   |             |            |             |   |             |             |             |   |             |             |             |   |             |             |             |   |             |             |             |   |             |             |             |   |             |             |             |   |             |            |             |   |             |             |             |   |             |             |            |   |             |             |             |   |             |            |             |   |            |            |            |   |            |            |            |   |            |            |            |
| C                                                                                                                                                                                                                                                                                                                                                                                                                                                                                                                                                                                                                                                                                                                                                                                                                                                                                                                                                                                                                                                                                                                                                                                                                                                                                                                                                                                                                                                                                                                                                                                                                                                                                                                                                                                                                                                                                                                                                                                                                                                                                                                                                                                                                                                                                                                                               | 2.41639900  | -1.90728600                                                                        | 0.01189300                                                                           |             |   |            |            |             |   |            |             |             |   |            |             |             |   |            |             |             |   |            |             |             |   |            |            |             |   |            |             |             |   |            |             |            |   |            |             |             |   |            |            |             |   |            |             |             |   |            |             |             |   |             |             |             |   |             |             |             |   |             |             |            |   |             |             |             |   |             |             |             |   |             |             |             |   |             |             |             |   |             |             |            |   |             |             |             |   |             |            |             |   |             |             |             |   |             |            |             |   |             |            |             |   |             |             |             |                                                                                                                                                                                                                                                                                                                                                                                                                                                                                                                                                                                                                                                                                                                                                                                                                                                                                                                                                                                                                                                                                                                                                                                                                                                                                                                                                                                                                                                                                                                                                                                                                                                                                                                                                                                                                                                                                                                                                                                                                                                                                                                                                                                                                                                                                                                                                                                                                                                                                                                     |            |             |            |                                                                                                                                                                                                                                                                                                                                                                                                                                                                                                                                                                                                                                                                                                                                                                                                                                                                                                                                                                                                                                                                                                                                                                                                                                                                                                                                                                                                                                                                                                                                                                                                                                                                                                                                                                                                                                                                                                                                                                                                                                                                                                                                                                                                                                                                                                                                                                                                                                                                                                                                                                                               |   |            |             |             |   |            |             |             |   |            |             |             |   |            |             |             |   |            |             |             |   |            |             |             |   |            |             |            |   |            |             |            |   |            |             |             |   |            |             |             |   |            |             |             |   |             |             |             |   |             |             |             |   |             |             |             |   |             |            |             |   |             |             |             |   |             |             |             |   |             |             |             |   |             |            |             |   |             |             |             |   |             |             |             |   |             |             |             |   |             |             |             |   |             |            |             |   |             |             |             |   |             |             |            |   |             |            |             |   |             |             |             |   |             |            |            |                                                                                                                                                                                                                                                                                                                                                                                                                                                                                                                                                                                                                                                                                                                                                                                                                                                                                                                                                                                                                                                                                                                                                                                                                                                                                                                                                                                                                                                                                                                                                                                                                                                                                                                                                                                                                                                                                                                                                                                                                                                                                                                                                                                                                                                                                                                                                                                                                                                                                                                        |            |            |            |             |            |            |            |                                                                                                                                                                                                                                                                                                                                                                                                                                                                                                                                                                                                                                                                                                                                                                                                                                                                                                                                                                                                                                                                                                                                                                                                                                                                                                                                                                                                                                                                                                                                                                                                                                                                                                                                                                                                                                                                                                                                                                                                                                                                                                                                                                                                                                                                                                                                                                                                                                                                                                                                                                                             |   |            |             |             |   |            |             |             |   |            |             |             |   |            |             |             |   |            |             |             |   |            |             |             |   |            |             |            |   |            |             |            |   |            |            |             |   |            |             |             |   |            |             |             |   |             |             |             |   |             |             |             |   |             |            |             |   |             |             |             |   |             |             |             |   |             |            |             |   |             |             |             |   |             |             |             |   |             |             |             |   |             |             |             |   |             |             |             |   |             |             |             |   |             |            |             |   |             |             |             |   |             |             |            |   |             |             |             |   |             |            |             |   |            |            |            |   |            |            |            |   |            |            |            |
| C                                                                                                                                                                                                                                                                                                                                                                                                                                                                                                                                                                                                                                                                                                                                                                                                                                                                                                                                                                                                                                                                                                                                                                                                                                                                                                                                                                                                                                                                                                                                                                                                                                                                                                                                                                                                                                                                                                                                                                                                                                                                                                                                                                                                                                                                                                                                               | 3.79861300  | -1.80484400                                                                        | -0.03309300                                                                          |             |   |            |            |             |   |            |             |             |   |            |             |             |   |            |             |             |   |            |             |             |   |            |            |             |   |            |             |             |   |            |             |            |   |            |             |             |   |            |            |             |   |            |             |             |   |            |             |             |   |             |             |             |   |             |             |             |   |             |             |            |   |             |             |             |   |             |             |             |   |             |             |             |   |             |             |             |   |             |             |            |   |             |             |             |   |             |            |             |   |             |             |             |   |             |            |             |   |             |            |             |   |             |             |             |                                                                                                                                                                                                                                                                                                                                                                                                                                                                                                                                                                                                                                                                                                                                                                                                                                                                                                                                                                                                                                                                                                                                                                                                                                                                                                                                                                                                                                                                                                                                                                                                                                                                                                                                                                                                                                                                                                                                                                                                                                                                                                                                                                                                                                                                                                                                                                                                                                                                                                                     |            |             |            |                                                                                                                                                                                                                                                                                                                                                                                                                                                                                                                                                                                                                                                                                                                                                                                                                                                                                                                                                                                                                                                                                                                                                                                                                                                                                                                                                                                                                                                                                                                                                                                                                                                                                                                                                                                                                                                                                                                                                                                                                                                                                                                                                                                                                                                                                                                                                                                                                                                                                                                                                                                               |   |            |             |             |   |            |             |             |   |            |             |             |   |            |             |             |   |            |             |             |   |            |             |             |   |            |             |            |   |            |             |            |   |            |             |             |   |            |             |             |   |            |             |             |   |             |             |             |   |             |             |             |   |             |             |             |   |             |            |             |   |             |             |             |   |             |             |             |   |             |             |             |   |             |            |             |   |             |             |             |   |             |             |             |   |             |             |             |   |             |             |             |   |             |            |             |   |             |             |             |   |             |             |            |   |             |            |             |   |             |             |             |   |             |            |            |                                                                                                                                                                                                                                                                                                                                                                                                                                                                                                                                                                                                                                                                                                                                                                                                                                                                                                                                                                                                                                                                                                                                                                                                                                                                                                                                                                                                                                                                                                                                                                                                                                                                                                                                                                                                                                                                                                                                                                                                                                                                                                                                                                                                                                                                                                                                                                                                                                                                                                                        |            |            |            |             |            |            |            |                                                                                                                                                                                                                                                                                                                                                                                                                                                                                                                                                                                                                                                                                                                                                                                                                                                                                                                                                                                                                                                                                                                                                                                                                                                                                                                                                                                                                                                                                                                                                                                                                                                                                                                                                                                                                                                                                                                                                                                                                                                                                                                                                                                                                                                                                                                                                                                                                                                                                                                                                                                             |   |            |             |             |   |            |             |             |   |            |             |             |   |            |             |             |   |            |             |             |   |            |             |             |   |            |             |            |   |            |             |            |   |            |            |             |   |            |             |             |   |            |             |             |   |             |             |             |   |             |             |             |   |             |            |             |   |             |             |             |   |             |             |             |   |             |            |             |   |             |             |             |   |             |             |             |   |             |             |             |   |             |             |             |   |             |             |             |   |             |             |             |   |             |            |             |   |             |             |             |   |             |             |            |   |             |             |             |   |             |            |             |   |            |            |            |   |            |            |            |   |            |            |            |
| C                                                                                                                                                                                                                                                                                                                                                                                                                                                                                                                                                                                                                                                                                                                                                                                                                                                                                                                                                                                                                                                                                                                                                                                                                                                                                                                                                                                                                                                                                                                                                                                                                                                                                                                                                                                                                                                                                                                                                                                                                                                                                                                                                                                                                                                                                                                                               | 4.40019800  | -0.57520600                                                                        | -0.27062400                                                                          |             |   |            |            |             |   |            |             |             |   |            |             |             |   |            |             |             |   |            |             |             |   |            |            |             |   |            |             |             |   |            |             |            |   |            |             |             |   |            |            |             |   |            |             |             |   |            |             |             |   |             |             |             |   |             |             |             |   |             |             |            |   |             |             |             |   |             |             |             |   |             |             |             |   |             |             |             |   |             |             |            |   |             |             |             |   |             |            |             |   |             |             |             |   |             |            |             |   |             |            |             |   |             |             |             |                                                                                                                                                                                                                                                                                                                                                                                                                                                                                                                                                                                                                                                                                                                                                                                                                                                                                                                                                                                                                                                                                                                                                                                                                                                                                                                                                                                                                                                                                                                                                                                                                                                                                                                                                                                                                                                                                                                                                                                                                                                                                                                                                                                                                                                                                                                                                                                                                                                                                                                     |            |             |            |                                                                                                                                                                                                                                                                                                                                                                                                                                                                                                                                                                                                                                                                                                                                                                                                                                                                                                                                                                                                                                                                                                                                                                                                                                                                                                                                                                                                                                                                                                                                                                                                                                                                                                                                                                                                                                                                                                                                                                                                                                                                                                                                                                                                                                                                                                                                                                                                                                                                                                                                                                                               |   |            |             |             |   |            |             |             |   |            |             |             |   |            |             |             |   |            |             |             |   |            |             |             |   |            |             |            |   |            |             |            |   |            |             |             |   |            |             |             |   |            |             |             |   |             |             |             |   |             |             |             |   |             |             |             |   |             |            |             |   |             |             |             |   |             |             |             |   |             |             |             |   |             |            |             |   |             |             |             |   |             |             |             |   |             |             |             |   |             |             |             |   |             |            |             |   |             |             |             |   |             |             |            |   |             |            |             |   |             |             |             |   |             |            |            |                                                                                                                                                                                                                                                                                                                                                                                                                                                                                                                                                                                                                                                                                                                                                                                                                                                                                                                                                                                                                                                                                                                                                                                                                                                                                                                                                                                                                                                                                                                                                                                                                                                                                                                                                                                                                                                                                                                                                                                                                                                                                                                                                                                                                                                                                                                                                                                                                                                                                                                        |            |            |            |             |            |            |            |                                                                                                                                                                                                                                                                                                                                                                                                                                                                                                                                                                                                                                                                                                                                                                                                                                                                                                                                                                                                                                                                                                                                                                                                                                                                                                                                                                                                                                                                                                                                                                                                                                                                                                                                                                                                                                                                                                                                                                                                                                                                                                                                                                                                                                                                                                                                                                                                                                                                                                                                                                                             |   |            |             |             |   |            |             |             |   |            |             |             |   |            |             |             |   |            |             |             |   |            |             |             |   |            |             |            |   |            |             |            |   |            |            |             |   |            |             |             |   |            |             |             |   |             |             |             |   |             |             |             |   |             |            |             |   |             |             |             |   |             |             |             |   |             |            |             |   |             |             |             |   |             |             |             |   |             |             |             |   |             |             |             |   |             |             |             |   |             |             |             |   |             |            |             |   |             |             |             |   |             |             |            |   |             |             |             |   |             |            |             |   |            |            |            |   |            |            |            |   |            |            |            |
| H                                                                                                                                                                                                                                                                                                                                                                                                                                                                                                                                                                                                                                                                                                                                                                                                                                                                                                                                                                                                                                                                                                                                                                                                                                                                                                                                                                                                                                                                                                                                                                                                                                                                                                                                                                                                                                                                                                                                                                                                                                                                                                                                                                                                                                                                                                                                               | 4.04677300  | 1.50726500                                                                         | -0.69925600                                                                          |             |   |            |            |             |   |            |             |             |   |            |             |             |   |            |             |             |   |            |             |             |   |            |            |             |   |            |             |             |   |            |             |            |   |            |             |             |   |            |            |             |   |            |             |             |   |            |             |             |   |             |             |             |   |             |             |             |   |             |             |            |   |             |             |             |   |             |             |             |   |             |             |             |   |             |             |             |   |             |             |            |   |             |             |             |   |             |            |             |   |             |             |             |   |             |            |             |   |             |            |             |   |             |             |             |                                                                                                                                                                                                                                                                                                                                                                                                                                                                                                                                                                                                                                                                                                                                                                                                                                                                                                                                                                                                                                                                                                                                                                                                                                                                                                                                                                                                                                                                                                                                                                                                                                                                                                                                                                                                                                                                                                                                                                                                                                                                                                                                                                                                                                                                                                                                                                                                                                                                                                                     |            |             |            |                                                                                                                                                                                                                                                                                                                                                                                                                                                                                                                                                                                                                                                                                                                                                                                                                                                                                                                                                                                                                                                                                                                                                                                                                                                                                                                                                                                                                                                                                                                                                                                                                                                                                                                                                                                                                                                                                                                                                                                                                                                                                                                                                                                                                                                                                                                                                                                                                                                                                                                                                                                               |   |            |             |             |   |            |             |             |   |            |             |             |   |            |             |             |   |            |             |             |   |            |             |             |   |            |             |            |   |            |             |            |   |            |             |             |   |            |             |             |   |            |             |             |   |             |             |             |   |             |             |             |   |             |             |             |   |             |            |             |   |             |             |             |   |             |             |             |   |             |             |             |   |             |            |             |   |             |             |             |   |             |             |             |   |             |             |             |   |             |             |             |   |             |            |             |   |             |             |             |   |             |             |            |   |             |            |             |   |             |             |             |   |             |            |            |                                                                                                                                                                                                                                                                                                                                                                                                                                                                                                                                                                                                                                                                                                                                                                                                                                                                                                                                                                                                                                                                                                                                                                                                                                                                                                                                                                                                                                                                                                                                                                                                                                                                                                                                                                                                                                                                                                                                                                                                                                                                                                                                                                                                                                                                                                                                                                                                                                                                                                                        |            |            |            |             |            |            |            |                                                                                                                                                                                                                                                                                                                                                                                                                                                                                                                                                                                                                                                                                                                                                                                                                                                                                                                                                                                                                                                                                                                                                                                                                                                                                                                                                                                                                                                                                                                                                                                                                                                                                                                                                                                                                                                                                                                                                                                                                                                                                                                                                                                                                                                                                                                                                                                                                                                                                                                                                                                             |   |            |             |             |   |            |             |             |   |            |             |             |   |            |             |             |   |            |             |             |   |            |             |             |   |            |             |            |   |            |             |            |   |            |            |             |   |            |             |             |   |            |             |             |   |             |             |             |   |             |             |             |   |             |            |             |   |             |             |             |   |             |             |             |   |             |            |             |   |             |             |             |   |             |             |             |   |             |             |             |   |             |             |             |   |             |             |             |   |             |             |             |   |             |            |             |   |             |             |             |   |             |             |            |   |             |             |             |   |             |            |             |   |            |            |            |   |            |            |            |   |            |            |            |
| H                                                                                                                                                                                                                                                                                                                                                                                                                                                                                                                                                                                                                                                                                                                                                                                                                                                                                                                                                                                                                                                                                                                                                                                                                                                                                                                                                                                                                                                                                                                                                                                                                                                                                                                                                                                                                                                                                                                                                                                                                                                                                                                                                                                                                                                                                                                                               | 1.93095000  | -2.85680000                                                                        | 0.20072300                                                                           |             |   |            |            |             |   |            |             |             |   |            |             |             |   |            |             |             |   |            |             |             |   |            |            |             |   |            |             |             |   |            |             |            |   |            |             |             |   |            |            |             |   |            |             |             |   |            |             |             |   |             |             |             |   |             |             |             |   |             |             |            |   |             |             |             |   |             |             |             |   |             |             |             |   |             |             |             |   |             |             |            |   |             |             |             |   |             |            |             |   |             |             |             |   |             |            |             |   |             |            |             |   |             |             |             |                                                                                                                                                                                                                                                                                                                                                                                                                                                                                                                                                                                                                                                                                                                                                                                                                                                                                                                                                                                                                                                                                                                                                                                                                                                                                                                                                                                                                                                                                                                                                                                                                                                                                                                                                                                                                                                                                                                                                                                                                                                                                                                                                                                                                                                                                                                                                                                                                                                                                                                     |            |             |            |                                                                                                                                                                                                                                                                                                                                                                                                                                                                                                                                                                                                                                                                                                                                                                                                                                                                                                                                                                                                                                                                                                                                                                                                                                                                                                                                                                                                                                                                                                                                                                                                                                                                                                                                                                                                                                                                                                                                                                                                                                                                                                                                                                                                                                                                                                                                                                                                                                                                                                                                                                                               |   |            |             |             |   |            |             |             |   |            |             |             |   |            |             |             |   |            |             |             |   |            |             |             |   |            |             |            |   |            |             |            |   |            |             |             |   |            |             |             |   |            |             |             |   |             |             |             |   |             |             |             |   |             |             |             |   |             |            |             |   |             |             |             |   |             |             |             |   |             |             |             |   |             |            |             |   |             |             |             |   |             |             |             |   |             |             |             |   |             |             |             |   |             |            |             |   |             |             |             |   |             |             |            |   |             |            |             |   |             |             |             |   |             |            |            |                                                                                                                                                                                                                                                                                                                                                                                                                                                                                                                                                                                                                                                                                                                                                                                                                                                                                                                                                                                                                                                                                                                                                                                                                                                                                                                                                                                                                                                                                                                                                                                                                                                                                                                                                                                                                                                                                                                                                                                                                                                                                                                                                                                                                                                                                                                                                                                                                                                                                                                        |            |            |            |             |            |            |            |                                                                                                                                                                                                                                                                                                                                                                                                                                                                                                                                                                                                                                                                                                                                                                                                                                                                                                                                                                                                                                                                                                                                                                                                                                                                                                                                                                                                                                                                                                                                                                                                                                                                                                                                                                                                                                                                                                                                                                                                                                                                                                                                                                                                                                                                                                                                                                                                                                                                                                                                                                                             |   |            |             |             |   |            |             |             |   |            |             |             |   |            |             |             |   |            |             |             |   |            |             |             |   |            |             |            |   |            |             |            |   |            |            |             |   |            |             |             |   |            |             |             |   |             |             |             |   |             |             |             |   |             |            |             |   |             |             |             |   |             |             |             |   |             |            |             |   |             |             |             |   |             |             |             |   |             |             |             |   |             |             |             |   |             |             |             |   |             |             |             |   |             |            |             |   |             |             |             |   |             |             |            |   |             |             |             |   |             |            |             |   |            |            |            |   |            |            |            |   |            |            |            |
| H                                                                                                                                                                                                                                                                                                                                                                                                                                                                                                                                                                                                                                                                                                                                                                                                                                                                                                                                                                                                                                                                                                                                                                                                                                                                                                                                                                                                                                                                                                                                                                                                                                                                                                                                                                                                                                                                                                                                                                                                                                                                                                                                                                                                                                                                                                                                               | 4.40540600  | -2.68847800                                                                        | 0.12437000                                                                           |             |   |            |            |             |   |            |             |             |   |            |             |             |   |            |             |             |   |            |             |             |   |            |            |             |   |            |             |             |   |            |             |            |   |            |             |             |   |            |            |             |   |            |             |             |   |            |             |             |   |             |             |             |   |             |             |             |   |             |             |            |   |             |             |             |   |             |             |             |   |             |             |             |   |             |             |             |   |             |             |            |   |             |             |             |   |             |            |             |   |             |             |             |   |             |            |             |   |             |            |             |   |             |             |             |                                                                                                                                                                                                                                                                                                                                                                                                                                                                                                                                                                                                                                                                                                                                                                                                                                                                                                                                                                                                                                                                                                                                                                                                                                                                                                                                                                                                                                                                                                                                                                                                                                                                                                                                                                                                                                                                                                                                                                                                                                                                                                                                                                                                                                                                                                                                                                                                                                                                                                                     |            |             |            |                                                                                                                                                                                                                                                                                                                                                                                                                                                                                                                                                                                                                                                                                                                                                                                                                                                                                                                                                                                                                                                                                                                                                                                                                                                                                                                                                                                                                                                                                                                                                                                                                                                                                                                                                                                                                                                                                                                                                                                                                                                                                                                                                                                                                                                                                                                                                                                                                                                                                                                                                                                               |   |            |             |             |   |            |             |             |   |            |             |             |   |            |             |             |   |            |             |             |   |            |             |             |   |            |             |            |   |            |             |            |   |            |             |             |   |            |             |             |   |            |             |             |   |             |             |             |   |             |             |             |   |             |             |             |   |             |            |             |   |             |             |             |   |             |             |             |   |             |             |             |   |             |            |             |   |             |             |             |   |             |             |             |   |             |             |             |   |             |             |             |   |             |            |             |   |             |             |             |   |             |             |            |   |             |            |             |   |             |             |             |   |             |            |            |                                                                                                                                                                                                                                                                                                                                                                                                                                                                                                                                                                                                                                                                                                                                                                                                                                                                                                                                                                                                                                                                                                                                                                                                                                                                                                                                                                                                                                                                                                                                                                                                                                                                                                                                                                                                                                                                                                                                                                                                                                                                                                                                                                                                                                                                                                                                                                                                                                                                                                                        |            |            |            |             |            |            |            |                                                                                                                                                                                                                                                                                                                                                                                                                                                                                                                                                                                                                                                                                                                                                                                                                                                                                                                                                                                                                                                                                                                                                                                                                                                                                                                                                                                                                                                                                                                                                                                                                                                                                                                                                                                                                                                                                                                                                                                                                                                                                                                                                                                                                                                                                                                                                                                                                                                                                                                                                                                             |   |            |             |             |   |            |             |             |   |            |             |             |   |            |             |             |   |            |             |             |   |            |             |             |   |            |             |            |   |            |             |            |   |            |            |             |   |            |             |             |   |            |             |             |   |             |             |             |   |             |             |             |   |             |            |             |   |             |             |             |   |             |             |             |   |             |            |             |   |             |             |             |   |             |             |             |   |             |             |             |   |             |             |             |   |             |             |             |   |             |             |             |   |             |            |             |   |             |             |             |   |             |             |            |   |             |             |             |   |             |            |             |   |            |            |            |   |            |            |            |   |            |            |            |
| H                                                                                                                                                                                                                                                                                                                                                                                                                                                                                                                                                                                                                                                                                                                                                                                                                                                                                                                                                                                                                                                                                                                                                                                                                                                                                                                                                                                                                                                                                                                                                                                                                                                                                                                                                                                                                                                                                                                                                                                                                                                                                                                                                                                                                                                                                                                                               | 5.47961600  | -0.49237600                                                                        | -0.30134000                                                                          |             |   |            |            |             |   |            |             |             |   |            |             |             |   |            |             |             |   |            |             |             |   |            |            |             |   |            |             |             |   |            |             |            |   |            |             |             |   |            |            |             |   |            |             |             |   |            |             |             |   |             |             |             |   |             |             |             |   |             |             |            |   |             |             |             |   |             |             |             |   |             |             |             |   |             |             |             |   |             |             |            |   |             |             |             |   |             |            |             |   |             |             |             |   |             |            |             |   |             |            |             |   |             |             |             |                                                                                                                                                                                                                                                                                                                                                                                                                                                                                                                                                                                                                                                                                                                                                                                                                                                                                                                                                                                                                                                                                                                                                                                                                                                                                                                                                                                                                                                                                                                                                                                                                                                                                                                                                                                                                                                                                                                                                                                                                                                                                                                                                                                                                                                                                                                                                                                                                                                                                                                     |            |             |            |                                                                                                                                                                                                                                                                                                                                                                                                                                                                                                                                                                                                                                                                                                                                                                                                                                                                                                                                                                                                                                                                                                                                                                                                                                                                                                                                                                                                                                                                                                                                                                                                                                                                                                                                                                                                                                                                                                                                                                                                                                                                                                                                                                                                                                                                                                                                                                                                                                                                                                                                                                                               |   |            |             |             |   |            |             |             |   |            |             |             |   |            |             |             |   |            |             |             |   |            |             |             |   |            |             |            |   |            |             |            |   |            |             |             |   |            |             |             |   |            |             |             |   |             |             |             |   |             |             |             |   |             |             |             |   |             |            |             |   |             |             |             |   |             |             |             |   |             |             |             |   |             |            |             |   |             |             |             |   |             |             |             |   |             |             |             |   |             |             |             |   |             |            |             |   |             |             |             |   |             |             |            |   |             |            |             |   |             |             |             |   |             |            |            |                                                                                                                                                                                                                                                                                                                                                                                                                                                                                                                                                                                                                                                                                                                                                                                                                                                                                                                                                                                                                                                                                                                                                                                                                                                                                                                                                                                                                                                                                                                                                                                                                                                                                                                                                                                                                                                                                                                                                                                                                                                                                                                                                                                                                                                                                                                                                                                                                                                                                                                        |            |            |            |             |            |            |            |                                                                                                                                                                                                                                                                                                                                                                                                                                                                                                                                                                                                                                                                                                                                                                                                                                                                                                                                                                                                                                                                                                                                                                                                                                                                                                                                                                                                                                                                                                                                                                                                                                                                                                                                                                                                                                                                                                                                                                                                                                                                                                                                                                                                                                                                                                                                                                                                                                                                                                                                                                                             |   |            |             |             |   |            |             |             |   |            |             |             |   |            |             |             |   |            |             |             |   |            |             |             |   |            |             |            |   |            |             |            |   |            |            |             |   |            |             |             |   |            |             |             |   |             |             |             |   |             |             |             |   |             |            |             |   |             |             |             |   |             |             |             |   |             |            |             |   |             |             |             |   |             |             |             |   |             |             |             |   |             |             |             |   |             |             |             |   |             |             |             |   |             |            |             |   |             |             |             |   |             |             |            |   |             |             |             |   |             |            |             |   |            |            |            |   |            |            |            |   |            |            |            |
| C                                                                                                                                                                                                                                                                                                                                                                                                                                                                                                                                                                                                                                                                                                                                                                                                                                                                                                                                                                                                                                                                                                                                                                                                                                                                                                                                                                                                                                                                                                                                                                                                                                                                                                                                                                                                                                                                                                                                                                                                                                                                                                                                                                                                                                                                                                                                               | 1.34442100  | 1.64288300                                                                         | -0.75855500                                                                          |             |   |            |            |             |   |            |             |             |   |            |             |             |   |            |             |             |   |            |             |             |   |            |            |             |   |            |             |             |   |            |             |            |   |            |             |             |   |            |            |             |   |            |             |             |   |            |             |             |   |             |             |             |   |             |             |             |   |             |             |            |   |             |             |             |   |             |             |             |   |             |             |             |   |             |             |             |   |             |             |            |   |             |             |             |   |             |            |             |   |             |             |             |   |             |            |             |   |             |            |             |   |             |             |             |                                                                                                                                                                                                                                                                                                                                                                                                                                                                                                                                                                                                                                                                                                                                                                                                                                                                                                                                                                                                                                                                                                                                                                                                                                                                                                                                                                                                                                                                                                                                                                                                                                                                                                                                                                                                                                                                                                                                                                                                                                                                                                                                                                                                                                                                                                                                                                                                                                                                                                                     |            |             |            |                                                                                                                                                                                                                                                                                                                                                                                                                                                                                                                                                                                                                                                                                                                                                                                                                                                                                                                                                                                                                                                                                                                                                                                                                                                                                                                                                                                                                                                                                                                                                                                                                                                                                                                                                                                                                                                                                                                                                                                                                                                                                                                                                                                                                                                                                                                                                                                                                                                                                                                                                                                               |   |            |             |             |   |            |             |             |   |            |             |             |   |            |             |             |   |            |             |             |   |            |             |             |   |            |             |            |   |            |             |            |   |            |             |             |   |            |             |             |   |            |             |             |   |             |             |             |   |             |             |             |   |             |             |             |   |             |            |             |   |             |             |             |   |             |             |             |   |             |             |             |   |             |            |             |   |             |             |             |   |             |             |             |   |             |             |             |   |             |             |             |   |             |            |             |   |             |             |             |   |             |             |            |   |             |            |             |   |             |             |             |   |             |            |            |                                                                                                                                                                                                                                                                                                                                                                                                                                                                                                                                                                                                                                                                                                                                                                                                                                                                                                                                                                                                                                                                                                                                                                                                                                                                                                                                                                                                                                                                                                                                                                                                                                                                                                                                                                                                                                                                                                                                                                                                                                                                                                                                                                                                                                                                                                                                                                                                                                                                                                                        |            |            |            |             |            |            |            |                                                                                                                                                                                                                                                                                                                                                                                                                                                                                                                                                                                                                                                                                                                                                                                                                                                                                                                                                                                                                                                                                                                                                                                                                                                                                                                                                                                                                                                                                                                                                                                                                                                                                                                                                                                                                                                                                                                                                                                                                                                                                                                                                                                                                                                                                                                                                                                                                                                                                                                                                                                             |   |            |             |             |   |            |             |             |   |            |             |             |   |            |             |             |   |            |             |             |   |            |             |             |   |            |             |            |   |            |             |            |   |            |            |             |   |            |             |             |   |            |             |             |   |             |             |             |   |             |             |             |   |             |            |             |   |             |             |             |   |             |             |             |   |             |            |             |   |             |             |             |   |             |             |             |   |             |             |             |   |             |             |             |   |             |             |             |   |             |             |             |   |             |            |             |   |             |             |             |   |             |             |            |   |             |             |             |   |             |            |             |   |            |            |            |   |            |            |            |   |            |            |            |
| O                                                                                                                                                                                                                                                                                                                                                                                                                                                                                                                                                                                                                                                                                                                                                                                                                                                                                                                                                                                                                                                                                                                                                                                                                                                                                                                                                                                                                                                                                                                                                                                                                                                                                                                                                                                                                                                                                                                                                                                                                                                                                                                                                                                                                                                                                                                                               | 1.88914700  | 2.68534800                                                                         | -1.26454700                                                                          |             |   |            |            |             |   |            |             |             |   |            |             |             |   |            |             |             |   |            |             |             |   |            |            |             |   |            |             |             |   |            |             |            |   |            |             |             |   |            |            |             |   |            |             |             |   |            |             |             |   |             |             |             |   |             |             |             |   |             |             |            |   |             |             |             |   |             |             |             |   |             |             |             |   |             |             |             |   |             |             |            |   |             |             |             |   |             |            |             |   |             |             |             |   |             |            |             |   |             |            |             |   |             |             |             |                                                                                                                                                                                                                                                                                                                                                                                                                                                                                                                                                                                                                                                                                                                                                                                                                                                                                                                                                                                                                                                                                                                                                                                                                                                                                                                                                                                                                                                                                                                                                                                                                                                                                                                                                                                                                                                                                                                                                                                                                                                                                                                                                                                                                                                                                                                                                                                                                                                                                                                     |            |             |            |                                                                                                                                                                                                                                                                                                                                                                                                                                                                                                                                                                                                                                                                                                                                                                                                                                                                                                                                                                                                                                                                                                                                                                                                                                                                                                                                                                                                                                                                                                                                                                                                                                                                                                                                                                                                                                                                                                                                                                                                                                                                                                                                                                                                                                                                                                                                                                                                                                                                                                                                                                                               |   |            |             |             |   |            |             |             |   |            |             |             |   |            |             |             |   |            |             |             |   |            |             |             |   |            |             |            |   |            |             |            |   |            |             |             |   |            |             |             |   |            |             |             |   |             |             |             |   |             |             |             |   |             |             |             |   |             |            |             |   |             |             |             |   |             |             |             |   |             |             |             |   |             |            |             |   |             |             |             |   |             |             |             |   |             |             |             |   |             |             |             |   |             |            |             |   |             |             |             |   |             |             |            |   |             |            |             |   |             |             |             |   |             |            |            |                                                                                                                                                                                                                                                                                                                                                                                                                                                                                                                                                                                                                                                                                                                                                                                                                                                                                                                                                                                                                                                                                                                                                                                                                                                                                                                                                                                                                                                                                                                                                                                                                                                                                                                                                                                                                                                                                                                                                                                                                                                                                                                                                                                                                                                                                                                                                                                                                                                                                                                        |            |            |            |             |            |            |            |                                                                                                                                                                                                                                                                                                                                                                                                                                                                                                                                                                                                                                                                                                                                                                                                                                                                                                                                                                                                                                                                                                                                                                                                                                                                                                                                                                                                                                                                                                                                                                                                                                                                                                                                                                                                                                                                                                                                                                                                                                                                                                                                                                                                                                                                                                                                                                                                                                                                                                                                                                                             |   |            |             |             |   |            |             |             |   |            |             |             |   |            |             |             |   |            |             |             |   |            |             |             |   |            |             |            |   |            |             |            |   |            |            |             |   |            |             |             |   |            |             |             |   |             |             |             |   |             |             |             |   |             |            |             |   |             |             |             |   |             |             |             |   |             |            |             |   |             |             |             |   |             |             |             |   |             |             |             |   |             |             |             |   |             |             |             |   |             |             |             |   |             |            |             |   |             |             |             |   |             |             |            |   |             |             |             |   |             |            |             |   |            |            |            |   |            |            |            |   |            |            |            |
| O                                                                                                                                                                                                                                                                                                                                                                                                                                                                                                                                                                                                                                                                                                                                                                                                                                                                                                                                                                                                                                                                                                                                                                                                                                                                                                                                                                                                                                                                                                                                                                                                                                                                                                                                                                                                                                                                                                                                                                                                                                                                                                                                                                                                                                                                                                                                               | 0.29154400  | -0.93188700                                                                        | -0.16057300                                                                          |             |   |            |            |             |   |            |             |             |   |            |             |             |   |            |             |             |   |            |             |             |   |            |            |             |   |            |             |             |   |            |             |            |   |            |             |             |   |            |            |             |   |            |             |             |   |            |             |             |   |             |             |             |   |             |             |             |   |             |             |            |   |             |             |             |   |             |             |             |   |             |             |             |   |             |             |             |   |             |             |            |   |             |             |             |   |             |            |             |   |             |             |             |   |             |            |             |   |             |            |             |   |             |             |             |                                                                                                                                                                                                                                                                                                                                                                                                                                                                                                                                                                                                                                                                                                                                                                                                                                                                                                                                                                                                                                                                                                                                                                                                                                                                                                                                                                                                                                                                                                                                                                                                                                                                                                                                                                                                                                                                                                                                                                                                                                                                                                                                                                                                                                                                                                                                                                                                                                                                                                                     |            |             |            |                                                                                                                                                                                                                                                                                                                                                                                                                                                                                                                                                                                                                                                                                                                                                                                                                                                                                                                                                                                                                                                                                                                                                                                                                                                                                                                                                                                                                                                                                                                                                                                                                                                                                                                                                                                                                                                                                                                                                                                                                                                                                                                                                                                                                                                                                                                                                                                                                                                                                                                                                                                               |   |            |             |             |   |            |             |             |   |            |             |             |   |            |             |             |   |            |             |             |   |            |             |             |   |            |             |            |   |            |             |            |   |            |             |             |   |            |             |             |   |            |             |             |   |             |             |             |   |             |             |             |   |             |             |             |   |             |            |             |   |             |             |             |   |             |             |             |   |             |             |             |   |             |            |             |   |             |             |             |   |             |             |             |   |             |             |             |   |             |             |             |   |             |            |             |   |             |             |             |   |             |             |            |   |             |            |             |   |             |             |             |   |             |            |            |                                                                                                                                                                                                                                                                                                                                                                                                                                                                                                                                                                                                                                                                                                                                                                                                                                                                                                                                                                                                                                                                                                                                                                                                                                                                                                                                                                                                                                                                                                                                                                                                                                                                                                                                                                                                                                                                                                                                                                                                                                                                                                                                                                                                                                                                                                                                                                                                                                                                                                                        |            |            |            |             |            |            |            |                                                                                                                                                                                                                                                                                                                                                                                                                                                                                                                                                                                                                                                                                                                                                                                                                                                                                                                                                                                                                                                                                                                                                                                                                                                                                                                                                                                                                                                                                                                                                                                                                                                                                                                                                                                                                                                                                                                                                                                                                                                                                                                                                                                                                                                                                                                                                                                                                                                                                                                                                                                             |   |            |             |             |   |            |             |             |   |            |             |             |   |            |             |             |   |            |             |             |   |            |             |             |   |            |             |            |   |            |             |            |   |            |            |             |   |            |             |             |   |            |             |             |   |             |             |             |   |             |             |             |   |             |            |             |   |             |             |             |   |             |             |             |   |             |            |             |   |             |             |             |   |             |             |             |   |             |             |             |   |             |             |             |   |             |             |             |   |             |             |             |   |             |            |             |   |             |             |             |   |             |             |            |   |             |             |             |   |             |            |             |   |            |            |            |   |            |            |            |   |            |            |            |
| C                                                                                                                                                                                                                                                                                                                                                                                                                                                                                                                                                                                                                                                                                                                                                                                                                                                                                                                                                                                                                                                                                                                                                                                                                                                                                                                                                                                                                                                                                                                                                                                                                                                                                                                                                                                                                                                                                                                                                                                                                                                                                                                                                                                                                                                                                                                                               | -1.92336800 | -0.09745700                                                                        | -0.16468400                                                                          |             |   |            |            |             |   |            |             |             |   |            |             |             |   |            |             |             |   |            |             |             |   |            |            |             |   |            |             |             |   |            |             |            |   |            |             |             |   |            |            |             |   |            |             |             |   |            |             |             |   |             |             |             |   |             |             |             |   |             |             |            |   |             |             |             |   |             |             |             |   |             |             |             |   |             |             |             |   |             |             |            |   |             |             |             |   |             |            |             |   |             |             |             |   |             |            |             |   |             |            |             |   |             |             |             |                                                                                                                                                                                                                                                                                                                                                                                                                                                                                                                                                                                                                                                                                                                                                                                                                                                                                                                                                                                                                                                                                                                                                                                                                                                                                                                                                                                                                                                                                                                                                                                                                                                                                                                                                                                                                                                                                                                                                                                                                                                                                                                                                                                                                                                                                                                                                                                                                                                                                                                     |            |             |            |                                                                                                                                                                                                                                                                                                                                                                                                                                                                                                                                                                                                                                                                                                                                                                                                                                                                                                                                                                                                                                                                                                                                                                                                                                                                                                                                                                                                                                                                                                                                                                                                                                                                                                                                                                                                                                                                                                                                                                                                                                                                                                                                                                                                                                                                                                                                                                                                                                                                                                                                                                                               |   |            |             |             |   |            |             |             |   |            |             |             |   |            |             |             |   |            |             |             |   |            |             |             |   |            |             |            |   |            |             |            |   |            |             |             |   |            |             |             |   |            |             |             |   |             |             |             |   |             |             |             |   |             |             |             |   |             |            |             |   |             |             |             |   |             |             |             |   |             |             |             |   |             |            |             |   |             |             |             |   |             |             |             |   |             |             |             |   |             |             |             |   |             |            |             |   |             |             |             |   |             |             |            |   |             |            |             |   |             |             |             |   |             |            |            |                                                                                                                                                                                                                                                                                                                                                                                                                                                                                                                                                                                                                                                                                                                                                                                                                                                                                                                                                                                                                                                                                                                                                                                                                                                                                                                                                                                                                                                                                                                                                                                                                                                                                                                                                                                                                                                                                                                                                                                                                                                                                                                                                                                                                                                                                                                                                                                                                                                                                                                        |            |            |            |             |            |            |            |                                                                                                                                                                                                                                                                                                                                                                                                                                                                                                                                                                                                                                                                                                                                                                                                                                                                                                                                                                                                                                                                                                                                                                                                                                                                                                                                                                                                                                                                                                                                                                                                                                                                                                                                                                                                                                                                                                                                                                                                                                                                                                                                                                                                                                                                                                                                                                                                                                                                                                                                                                                             |   |            |             |             |   |            |             |             |   |            |             |             |   |            |             |             |   |            |             |             |   |            |             |             |   |            |             |            |   |            |             |            |   |            |            |             |   |            |             |             |   |            |             |             |   |             |             |             |   |             |             |             |   |             |            |             |   |             |             |             |   |             |             |             |   |             |            |             |   |             |             |             |   |             |             |             |   |             |             |             |   |             |             |             |   |             |             |             |   |             |             |             |   |             |            |             |   |             |             |             |   |             |             |            |   |             |             |             |   |             |            |             |   |            |            |            |   |            |            |            |   |            |            |            |
| C                                                                                                                                                                                                                                                                                                                                                                                                                                                                                                                                                                                                                                                                                                                                                                                                                                                                                                                                                                                                                                                                                                                                                                                                                                                                                                                                                                                                                                                                                                                                                                                                                                                                                                                                                                                                                                                                                                                                                                                                                                                                                                                                                                                                                                                                                                                                               | -2.29025300 | -1.33037100                                                                        | -0.69425400                                                                          |             |   |            |            |             |   |            |             |             |   |            |             |             |   |            |             |             |   |            |             |             |   |            |            |             |   |            |             |             |   |            |             |            |   |            |             |             |   |            |            |             |   |            |             |             |   |            |             |             |   |             |             |             |   |             |             |             |   |             |             |            |   |             |             |             |   |             |             |             |   |             |             |             |   |             |             |             |   |             |             |            |   |             |             |             |   |             |            |             |   |             |             |             |   |             |            |             |   |             |            |             |   |             |             |             |                                                                                                                                                                                                                                                                                                                                                                                                                                                                                                                                                                                                                                                                                                                                                                                                                                                                                                                                                                                                                                                                                                                                                                                                                                                                                                                                                                                                                                                                                                                                                                                                                                                                                                                                                                                                                                                                                                                                                                                                                                                                                                                                                                                                                                                                                                                                                                                                                                                                                                                     |            |             |            |                                                                                                                                                                                                                                                                                                                                                                                                                                                                                                                                                                                                                                                                                                                                                                                                                                                                                                                                                                                                                                                                                                                                                                                                                                                                                                                                                                                                                                                                                                                                                                                                                                                                                                                                                                                                                                                                                                                                                                                                                                                                                                                                                                                                                                                                                                                                                                                                                                                                                                                                                                                               |   |            |             |             |   |            |             |             |   |            |             |             |   |            |             |             |   |            |             |             |   |            |             |             |   |            |             |            |   |            |             |            |   |            |             |             |   |            |             |             |   |            |             |             |   |             |             |             |   |             |             |             |   |             |             |             |   |             |            |             |   |             |             |             |   |             |             |             |   |             |             |             |   |             |            |             |   |             |             |             |   |             |             |             |   |             |             |             |   |             |             |             |   |             |            |             |   |             |             |             |   |             |             |            |   |             |            |             |   |             |             |             |   |             |            |            |                                                                                                                                                                                                                                                                                                                                                                                                                                                                                                                                                                                                                                                                                                                                                                                                                                                                                                                                                                                                                                                                                                                                                                                                                                                                                                                                                                                                                                                                                                                                                                                                                                                                                                                                                                                                                                                                                                                                                                                                                                                                                                                                                                                                                                                                                                                                                                                                                                                                                                                        |            |            |            |             |            |            |            |                                                                                                                                                                                                                                                                                                                                                                                                                                                                                                                                                                                                                                                                                                                                                                                                                                                                                                                                                                                                                                                                                                                                                                                                                                                                                                                                                                                                                                                                                                                                                                                                                                                                                                                                                                                                                                                                                                                                                                                                                                                                                                                                                                                                                                                                                                                                                                                                                                                                                                                                                                                             |   |            |             |             |   |            |             |             |   |            |             |             |   |            |             |             |   |            |             |             |   |            |             |             |   |            |             |            |   |            |             |            |   |            |            |             |   |            |             |             |   |            |             |             |   |             |             |             |   |             |             |             |   |             |            |             |   |             |             |             |   |             |             |             |   |             |            |             |   |             |             |             |   |             |             |             |   |             |             |             |   |             |             |             |   |             |             |             |   |             |             |             |   |             |            |             |   |             |             |             |   |             |             |            |   |             |             |             |   |             |            |             |   |            |            |            |   |            |            |            |   |            |            |            |
| C                                                                                                                                                                                                                                                                                                                                                                                                                                                                                                                                                                                                                                                                                                                                                                                                                                                                                                                                                                                                                                                                                                                                                                                                                                                                                                                                                                                                                                                                                                                                                                                                                                                                                                                                                                                                                                                                                                                                                                                                                                                                                                                                                                                                                                                                                                                                               | -2.91895500 | 0.86103200                                                                         | 0.02761700                                                                           |             |   |            |            |             |   |            |             |             |   |            |             |             |   |            |             |             |   |            |             |             |   |            |            |             |   |            |             |             |   |            |             |            |   |            |             |             |   |            |            |             |   |            |             |             |   |            |             |             |   |             |             |             |   |             |             |             |   |             |             |            |   |             |             |             |   |             |             |             |   |             |             |             |   |             |             |             |   |             |             |            |   |             |             |             |   |             |            |             |   |             |             |             |   |             |            |             |   |             |            |             |   |             |             |             |                                                                                                                                                                                                                                                                                                                                                                                                                                                                                                                                                                                                                                                                                                                                                                                                                                                                                                                                                                                                                                                                                                                                                                                                                                                                                                                                                                                                                                                                                                                                                                                                                                                                                                                                                                                                                                                                                                                                                                                                                                                                                                                                                                                                                                                                                                                                                                                                                                                                                                                     |            |             |            |                                                                                                                                                                                                                                                                                                                                                                                                                                                                                                                                                                                                                                                                                                                                                                                                                                                                                                                                                                                                                                                                                                                                                                                                                                                                                                                                                                                                                                                                                                                                                                                                                                                                                                                                                                                                                                                                                                                                                                                                                                                                                                                                                                                                                                                                                                                                                                                                                                                                                                                                                                                               |   |            |             |             |   |            |             |             |   |            |             |             |   |            |             |             |   |            |             |             |   |            |             |             |   |            |             |            |   |            |             |            |   |            |             |             |   |            |             |             |   |            |             |             |   |             |             |             |   |             |             |             |   |             |             |             |   |             |            |             |   |             |             |             |   |             |             |             |   |             |             |             |   |             |            |             |   |             |             |             |   |             |             |             |   |             |             |             |   |             |             |             |   |             |            |             |   |             |             |             |   |             |             |            |   |             |            |             |   |             |             |             |   |             |            |            |                                                                                                                                                                                                                                                                                                                                                                                                                                                                                                                                                                                                                                                                                                                                                                                                                                                                                                                                                                                                                                                                                                                                                                                                                                                                                                                                                                                                                                                                                                                                                                                                                                                                                                                                                                                                                                                                                                                                                                                                                                                                                                                                                                                                                                                                                                                                                                                                                                                                                                                        |            |            |            |             |            |            |            |                                                                                                                                                                                                                                                                                                                                                                                                                                                                                                                                                                                                                                                                                                                                                                                                                                                                                                                                                                                                                                                                                                                                                                                                                                                                                                                                                                                                                                                                                                                                                                                                                                                                                                                                                                                                                                                                                                                                                                                                                                                                                                                                                                                                                                                                                                                                                                                                                                                                                                                                                                                             |   |            |             |             |   |            |             |             |   |            |             |             |   |            |             |             |   |            |             |             |   |            |             |             |   |            |             |            |   |            |             |            |   |            |            |             |   |            |             |             |   |            |             |             |   |             |             |             |   |             |             |             |   |             |            |             |   |             |             |             |   |             |             |             |   |             |            |             |   |             |             |             |   |             |             |             |   |             |             |             |   |             |             |             |   |             |             |             |   |             |             |             |   |             |            |             |   |             |             |             |   |             |             |            |   |             |             |             |   |             |            |             |   |            |            |            |   |            |            |            |   |            |            |            |
| C                                                                                                                                                                                                                                                                                                                                                                                                                                                                                                                                                                                                                                                                                                                                                                                                                                                                                                                                                                                                                                                                                                                                                                                                                                                                                                                                                                                                                                                                                                                                                                                                                                                                                                                                                                                                                                                                                                                                                                                                                                                                                                                                                                                                                                                                                                                                               | -3.61186900 | -1.59526400                                                                        | -1.03331500                                                                          |             |   |            |            |             |   |            |             |             |   |            |             |             |   |            |             |             |   |            |             |             |   |            |            |             |   |            |             |             |   |            |             |            |   |            |             |             |   |            |            |             |   |            |             |             |   |            |             |             |   |             |             |             |   |             |             |             |   |             |             |            |   |             |             |             |   |             |             |             |   |             |             |             |   |             |             |             |   |             |             |            |   |             |             |             |   |             |            |             |   |             |             |             |   |             |            |             |   |             |            |             |   |             |             |             |                                                                                                                                                                                                                                                                                                                                                                                                                                                                                                                                                                                                                                                                                                                                                                                                                                                                                                                                                                                                                                                                                                                                                                                                                                                                                                                                                                                                                                                                                                                                                                                                                                                                                                                                                                                                                                                                                                                                                                                                                                                                                                                                                                                                                                                                                                                                                                                                                                                                                                                     |            |             |            |                                                                                                                                                                                                                                                                                                                                                                                                                                                                                                                                                                                                                                                                                                                                                                                                                                                                                                                                                                                                                                                                                                                                                                                                                                                                                                                                                                                                                                                                                                                                                                                                                                                                                                                                                                                                                                                                                                                                                                                                                                                                                                                                                                                                                                                                                                                                                                                                                                                                                                                                                                                               |   |            |             |             |   |            |             |             |   |            |             |             |   |            |             |             |   |            |             |             |   |            |             |             |   |            |             |            |   |            |             |            |   |            |             |             |   |            |             |             |   |            |             |             |   |             |             |             |   |             |             |             |   |             |             |             |   |             |            |             |   |             |             |             |   |             |             |             |   |             |             |             |   |             |            |             |   |             |             |             |   |             |             |             |   |             |             |             |   |             |             |             |   |             |            |             |   |             |             |             |   |             |             |            |   |             |            |             |   |             |             |             |   |             |            |            |                                                                                                                                                                                                                                                                                                                                                                                                                                                                                                                                                                                                                                                                                                                                                                                                                                                                                                                                                                                                                                                                                                                                                                                                                                                                                                                                                                                                                                                                                                                                                                                                                                                                                                                                                                                                                                                                                                                                                                                                                                                                                                                                                                                                                                                                                                                                                                                                                                                                                                                        |            |            |            |             |            |            |            |                                                                                                                                                                                                                                                                                                                                                                                                                                                                                                                                                                                                                                                                                                                                                                                                                                                                                                                                                                                                                                                                                                                                                                                                                                                                                                                                                                                                                                                                                                                                                                                                                                                                                                                                                                                                                                                                                                                                                                                                                                                                                                                                                                                                                                                                                                                                                                                                                                                                                                                                                                                             |   |            |             |             |   |            |             |             |   |            |             |             |   |            |             |             |   |            |             |             |   |            |             |             |   |            |             |            |   |            |             |            |   |            |            |             |   |            |             |             |   |            |             |             |   |             |             |             |   |             |             |             |   |             |            |             |   |             |             |             |   |             |             |             |   |             |            |             |   |             |             |             |   |             |             |             |   |             |             |             |   |             |             |             |   |             |             |             |   |             |             |             |   |             |            |             |   |             |             |             |   |             |             |            |   |             |             |             |   |             |            |             |   |            |            |            |   |            |            |            |   |            |            |            |
| H                                                                                                                                                                                                                                                                                                                                                                                                                                                                                                                                                                                                                                                                                                                                                                                                                                                                                                                                                                                                                                                                                                                                                                                                                                                                                                                                                                                                                                                                                                                                                                                                                                                                                                                                                                                                                                                                                                                                                                                                                                                                                                                                                                                                                                                                                                                                               | -1.53494900 | -2.08748400                                                                        | -0.84818000                                                                          |             |   |            |            |             |   |            |             |             |   |            |             |             |   |            |             |             |   |            |             |             |   |            |            |             |   |            |             |             |   |            |             |            |   |            |             |             |   |            |            |             |   |            |             |             |   |            |             |             |   |             |             |             |   |             |             |             |   |             |             |            |   |             |             |             |   |             |             |             |   |             |             |             |   |             |             |             |   |             |             |            |   |             |             |             |   |             |            |             |   |             |             |             |   |             |            |             |   |             |            |             |   |             |             |             |                                                                                                                                                                                                                                                                                                                                                                                                                                                                                                                                                                                                                                                                                                                                                                                                                                                                                                                                                                                                                                                                                                                                                                                                                                                                                                                                                                                                                                                                                                                                                                                                                                                                                                                                                                                                                                                                                                                                                                                                                                                                                                                                                                                                                                                                                                                                                                                                                                                                                                                     |            |             |            |                                                                                                                                                                                                                                                                                                                                                                                                                                                                                                                                                                                                                                                                                                                                                                                                                                                                                                                                                                                                                                                                                                                                                                                                                                                                                                                                                                                                                                                                                                                                                                                                                                                                                                                                                                                                                                                                                                                                                                                                                                                                                                                                                                                                                                                                                                                                                                                                                                                                                                                                                                                               |   |            |             |             |   |            |             |             |   |            |             |             |   |            |             |             |   |            |             |             |   |            |             |             |   |            |             |            |   |            |             |            |   |            |             |             |   |            |             |             |   |            |             |             |   |             |             |             |   |             |             |             |   |             |             |             |   |             |            |             |   |             |             |             |   |             |             |             |   |             |             |             |   |             |            |             |   |             |             |             |   |             |             |             |   |             |             |             |   |             |             |             |   |             |            |             |   |             |             |             |   |             |             |            |   |             |            |             |   |             |             |             |   |             |            |            |                                                                                                                                                                                                                                                                                                                                                                                                                                                                                                                                                                                                                                                                                                                                                                                                                                                                                                                                                                                                                                                                                                                                                                                                                                                                                                                                                                                                                                                                                                                                                                                                                                                                                                                                                                                                                                                                                                                                                                                                                                                                                                                                                                                                                                                                                                                                                                                                                                                                                                                        |            |            |            |             |            |            |            |                                                                                                                                                                                                                                                                                                                                                                                                                                                                                                                                                                                                                                                                                                                                                                                                                                                                                                                                                                                                                                                                                                                                                                                                                                                                                                                                                                                                                                                                                                                                                                                                                                                                                                                                                                                                                                                                                                                                                                                                                                                                                                                                                                                                                                                                                                                                                                                                                                                                                                                                                                                             |   |            |             |             |   |            |             |             |   |            |             |             |   |            |             |             |   |            |             |             |   |            |             |             |   |            |             |            |   |            |             |            |   |            |            |             |   |            |             |             |   |            |             |             |   |             |             |             |   |             |             |             |   |             |            |             |   |             |             |             |   |             |             |             |   |             |            |             |   |             |             |             |   |             |             |             |   |             |             |             |   |             |             |             |   |             |             |             |   |             |             |             |   |             |            |             |   |             |             |             |   |             |             |            |   |             |             |             |   |             |            |             |   |            |            |            |   |            |            |            |   |            |            |            |
| C                                                                                                                                                                                                                                                                                                                                                                                                                                                                                                                                                                                                                                                                                                                                                                                                                                                                                                                                                                                                                                                                                                                                                                                                                                                                                                                                                                                                                                                                                                                                                                                                                                                                                                                                                                                                                                                                                                                                                                                                                                                                                                                                                                                                                                                                                                                                               | -4.23680900 | 0.59708600                                                                         | -0.30764900                                                                          |             |   |            |            |             |   |            |             |             |   |            |             |             |   |            |             |             |   |            |             |             |   |            |            |             |   |            |             |             |   |            |             |            |   |            |             |             |   |            |            |             |   |            |             |             |   |            |             |             |   |             |             |             |   |             |             |             |   |             |             |            |   |             |             |             |   |             |             |             |   |             |             |             |   |             |             |             |   |             |             |            |   |             |             |             |   |             |            |             |   |             |             |             |   |             |            |             |   |             |            |             |   |             |             |             |                                                                                                                                                                                                                                                                                                                                                                                                                                                                                                                                                                                                                                                                                                                                                                                                                                                                                                                                                                                                                                                                                                                                                                                                                                                                                                                                                                                                                                                                                                                                                                                                                                                                                                                                                                                                                                                                                                                                                                                                                                                                                                                                                                                                                                                                                                                                                                                                                                                                                                                     |            |             |            |                                                                                                                                                                                                                                                                                                                                                                                                                                                                                                                                                                                                                                                                                                                                                                                                                                                                                                                                                                                                                                                                                                                                                                                                                                                                                                                                                                                                                                                                                                                                                                                                                                                                                                                                                                                                                                                                                                                                                                                                                                                                                                                                                                                                                                                                                                                                                                                                                                                                                                                                                                                               |   |            |             |             |   |            |             |             |   |            |             |             |   |            |             |             |   |            |             |             |   |            |             |             |   |            |             |            |   |            |             |            |   |            |             |             |   |            |             |             |   |            |             |             |   |             |             |             |   |             |             |             |   |             |             |             |   |             |            |             |   |             |             |             |   |             |             |             |   |             |             |             |   |             |            |             |   |             |             |             |   |             |             |             |   |             |             |             |   |             |             |             |   |             |            |             |   |             |             |             |   |             |             |            |   |             |            |             |   |             |             |             |   |             |            |            |                                                                                                                                                                                                                                                                                                                                                                                                                                                                                                                                                                                                                                                                                                                                                                                                                                                                                                                                                                                                                                                                                                                                                                                                                                                                                                                                                                                                                                                                                                                                                                                                                                                                                                                                                                                                                                                                                                                                                                                                                                                                                                                                                                                                                                                                                                                                                                                                                                                                                                                        |            |            |            |             |            |            |            |                                                                                                                                                                                                                                                                                                                                                                                                                                                                                                                                                                                                                                                                                                                                                                                                                                                                                                                                                                                                                                                                                                                                                                                                                                                                                                                                                                                                                                                                                                                                                                                                                                                                                                                                                                                                                                                                                                                                                                                                                                                                                                                                                                                                                                                                                                                                                                                                                                                                                                                                                                                             |   |            |             |             |   |            |             |             |   |            |             |             |   |            |             |             |   |            |             |             |   |            |             |             |   |            |             |            |   |            |             |            |   |            |            |             |   |            |             |             |   |            |             |             |   |             |             |             |   |             |             |             |   |             |            |             |   |             |             |             |   |             |             |             |   |             |            |             |   |             |             |             |   |             |             |             |   |             |             |             |   |             |             |             |   |             |             |             |   |             |             |             |   |             |            |             |   |             |             |             |   |             |             |            |   |             |             |             |   |             |            |             |   |            |            |            |   |            |            |            |   |            |            |            |
| H                                                                                                                                                                                                                                                                                                                                                                                                                                                                                                                                                                                                                                                                                                                                                                                                                                                                                                                                                                                                                                                                                                                                                                                                                                                                                                                                                                                                                                                                                                                                                                                                                                                                                                                                                                                                                                                                                                                                                                                                                                                                                                                                                                                                                                                                                                                                               | -2.65320800 | 1.81554700                                                                         | 0.46145000                                                                           |             |   |            |            |             |   |            |             |             |   |            |             |             |   |            |             |             |   |            |             |             |   |            |            |             |   |            |             |             |   |            |             |            |   |            |             |             |   |            |            |             |   |            |             |             |   |            |             |             |   |             |             |             |   |             |             |             |   |             |             |            |   |             |             |             |   |             |             |             |   |             |             |             |   |             |             |             |   |             |             |            |   |             |             |             |   |             |            |             |   |             |             |             |   |             |            |             |   |             |            |             |   |             |             |             |                                                                                                                                                                                                                                                                                                                                                                                                                                                                                                                                                                                                                                                                                                                                                                                                                                                                                                                                                                                                                                                                                                                                                                                                                                                                                                                                                                                                                                                                                                                                                                                                                                                                                                                                                                                                                                                                                                                                                                                                                                                                                                                                                                                                                                                                                                                                                                                                                                                                                                                     |            |             |            |                                                                                                                                                                                                                                                                                                                                                                                                                                                                                                                                                                                                                                                                                                                                                                                                                                                                                                                                                                                                                                                                                                                                                                                                                                                                                                                                                                                                                                                                                                                                                                                                                                                                                                                                                                                                                                                                                                                                                                                                                                                                                                                                                                                                                                                                                                                                                                                                                                                                                                                                                                                               |   |            |             |             |   |            |             |             |   |            |             |             |   |            |             |             |   |            |             |             |   |            |             |             |   |            |             |            |   |            |             |            |   |            |             |             |   |            |             |             |   |            |             |             |   |             |             |             |   |             |             |             |   |             |             |             |   |             |            |             |   |             |             |             |   |             |             |             |   |             |             |             |   |             |            |             |   |             |             |             |   |             |             |             |   |             |             |             |   |             |             |             |   |             |            |             |   |             |             |             |   |             |             |            |   |             |            |             |   |             |             |             |   |             |            |            |                                                                                                                                                                                                                                                                                                                                                                                                                                                                                                                                                                                                                                                                                                                                                                                                                                                                                                                                                                                                                                                                                                                                                                                                                                                                                                                                                                                                                                                                                                                                                                                                                                                                                                                                                                                                                                                                                                                                                                                                                                                                                                                                                                                                                                                                                                                                                                                                                                                                                                                        |            |            |            |             |            |            |            |                                                                                                                                                                                                                                                                                                                                                                                                                                                                                                                                                                                                                                                                                                                                                                                                                                                                                                                                                                                                                                                                                                                                                                                                                                                                                                                                                                                                                                                                                                                                                                                                                                                                                                                                                                                                                                                                                                                                                                                                                                                                                                                                                                                                                                                                                                                                                                                                                                                                                                                                                                                             |   |            |             |             |   |            |             |             |   |            |             |             |   |            |             |             |   |            |             |             |   |            |             |             |   |            |             |            |   |            |             |            |   |            |            |             |   |            |             |             |   |            |             |             |   |             |             |             |   |             |             |             |   |             |            |             |   |             |             |             |   |             |             |             |   |             |            |             |   |             |             |             |   |             |             |             |   |             |             |             |   |             |             |             |   |             |             |             |   |             |             |             |   |             |            |             |   |             |             |             |   |             |             |            |   |             |             |             |   |             |            |             |   |            |            |            |   |            |            |            |   |            |            |            |
| C                                                                                                                                                                                                                                                                                                                                                                                                                                                                                                                                                                                                                                                                                                                                                                                                                                                                                                                                                                                                                                                                                                                                                                                                                                                                                                                                                                                                                                                                                                                                                                                                                                                                                                                                                                                                                                                                                                                                                                                                                                                                                                                                                                                                                                                                                                                                               | -4.59203400 | -0.63456500                                                                        | -0.84345900                                                                          |             |   |            |            |             |   |            |             |             |   |            |             |             |   |            |             |             |   |            |             |             |   |            |            |             |   |            |             |             |   |            |             |            |   |            |             |             |   |            |            |             |   |            |             |             |   |            |             |             |   |             |             |             |   |             |             |             |   |             |             |            |   |             |             |             |   |             |             |             |   |             |             |             |   |             |             |             |   |             |             |            |   |             |             |             |   |             |            |             |   |             |             |             |   |             |            |             |   |             |            |             |   |             |             |             |                                                                                                                                                                                                                                                                                                                                                                                                                                                                                                                                                                                                                                                                                                                                                                                                                                                                                                                                                                                                                                                                                                                                                                                                                                                                                                                                                                                                                                                                                                                                                                                                                                                                                                                                                                                                                                                                                                                                                                                                                                                                                                                                                                                                                                                                                                                                                                                                                                                                                                                     |            |             |            |                                                                                                                                                                                                                                                                                                                                                                                                                                                                                                                                                                                                                                                                                                                                                                                                                                                                                                                                                                                                                                                                                                                                                                                                                                                                                                                                                                                                                                                                                                                                                                                                                                                                                                                                                                                                                                                                                                                                                                                                                                                                                                                                                                                                                                                                                                                                                                                                                                                                                                                                                                                               |   |            |             |             |   |            |             |             |   |            |             |             |   |            |             |             |   |            |             |             |   |            |             |             |   |            |             |            |   |            |             |            |   |            |             |             |   |            |             |             |   |            |             |             |   |             |             |             |   |             |             |             |   |             |             |             |   |             |            |             |   |             |             |             |   |             |             |             |   |             |             |             |   |             |            |             |   |             |             |             |   |             |             |             |   |             |             |             |   |             |             |             |   |             |            |             |   |             |             |             |   |             |             |            |   |             |            |             |   |             |             |             |   |             |            |            |                                                                                                                                                                                                                                                                                                                                                                                                                                                                                                                                                                                                                                                                                                                                                                                                                                                                                                                                                                                                                                                                                                                                                                                                                                                                                                                                                                                                                                                                                                                                                                                                                                                                                                                                                                                                                                                                                                                                                                                                                                                                                                                                                                                                                                                                                                                                                                                                                                                                                                                        |            |            |            |             |            |            |            |                                                                                                                                                                                                                                                                                                                                                                                                                                                                                                                                                                                                                                                                                                                                                                                                                                                                                                                                                                                                                                                                                                                                                                                                                                                                                                                                                                                                                                                                                                                                                                                                                                                                                                                                                                                                                                                                                                                                                                                                                                                                                                                                                                                                                                                                                                                                                                                                                                                                                                                                                                                             |   |            |             |             |   |            |             |             |   |            |             |             |   |            |             |             |   |            |             |             |   |            |             |             |   |            |             |            |   |            |             |            |   |            |            |             |   |            |             |             |   |            |             |             |   |             |             |             |   |             |             |             |   |             |            |             |   |             |             |             |   |             |             |             |   |             |            |             |   |             |             |             |   |             |             |             |   |             |             |             |   |             |             |             |   |             |             |             |   |             |             |             |   |             |            |             |   |             |             |             |   |             |             |            |   |             |             |             |   |             |            |             |   |            |            |            |   |            |            |            |   |            |            |            |
| H                                                                                                                                                                                                                                                                                                                                                                                                                                                                                                                                                                                                                                                                                                                                                                                                                                                                                                                                                                                                                                                                                                                                                                                                                                                                                                                                                                                                                                                                                                                                                                                                                                                                                                                                                                                                                                                                                                                                                                                                                                                                                                                                                                                                                                                                                                                                               | -3.87269400 | -2.56146500                                                                        | -1.44860800                                                                          |             |   |            |            |             |   |            |             |             |   |            |             |             |   |            |             |             |   |            |             |             |   |            |            |             |   |            |             |             |   |            |             |            |   |            |             |             |   |            |            |             |   |            |             |             |   |            |             |             |   |             |             |             |   |             |             |             |   |             |             |            |   |             |             |             |   |             |             |             |   |             |             |             |   |             |             |             |   |             |             |            |   |             |             |             |   |             |            |             |   |             |             |             |   |             |            |             |   |             |            |             |   |             |             |             |                                                                                                                                                                                                                                                                                                                                                                                                                                                                                                                                                                                                                                                                                                                                                                                                                                                                                                                                                                                                                                                                                                                                                                                                                                                                                                                                                                                                                                                                                                                                                                                                                                                                                                                                                                                                                                                                                                                                                                                                                                                                                                                                                                                                                                                                                                                                                                                                                                                                                                                     |            |             |            |                                                                                                                                                                                                                                                                                                                                                                                                                                                                                                                                                                                                                                                                                                                                                                                                                                                                                                                                                                                                                                                                                                                                                                                                                                                                                                                                                                                                                                                                                                                                                                                                                                                                                                                                                                                                                                                                                                                                                                                                                                                                                                                                                                                                                                                                                                                                                                                                                                                                                                                                                                                               |   |            |             |             |   |            |             |             |   |            |             |             |   |            |             |             |   |            |             |             |   |            |             |             |   |            |             |            |   |            |             |            |   |            |             |             |   |            |             |             |   |            |             |             |   |             |             |             |   |             |             |             |   |             |             |             |   |             |            |             |   |             |             |             |   |             |             |             |   |             |             |             |   |             |            |             |   |             |             |             |   |             |             |             |   |             |             |             |   |             |             |             |   |             |            |             |   |             |             |             |   |             |             |            |   |             |            |             |   |             |             |             |   |             |            |            |                                                                                                                                                                                                                                                                                                                                                                                                                                                                                                                                                                                                                                                                                                                                                                                                                                                                                                                                                                                                                                                                                                                                                                                                                                                                                                                                                                                                                                                                                                                                                                                                                                                                                                                                                                                                                                                                                                                                                                                                                                                                                                                                                                                                                                                                                                                                                                                                                                                                                                                        |            |            |            |             |            |            |            |                                                                                                                                                                                                                                                                                                                                                                                                                                                                                                                                                                                                                                                                                                                                                                                                                                                                                                                                                                                                                                                                                                                                                                                                                                                                                                                                                                                                                                                                                                                                                                                                                                                                                                                                                                                                                                                                                                                                                                                                                                                                                                                                                                                                                                                                                                                                                                                                                                                                                                                                                                                             |   |            |             |             |   |            |             |             |   |            |             |             |   |            |             |             |   |            |             |             |   |            |             |             |   |            |             |            |   |            |             |            |   |            |            |             |   |            |             |             |   |            |             |             |   |             |             |             |   |             |             |             |   |             |            |             |   |             |             |             |   |             |             |             |   |             |            |             |   |             |             |             |   |             |             |             |   |             |             |             |   |             |             |             |   |             |             |             |   |             |             |             |   |             |            |             |   |             |             |             |   |             |             |            |   |             |             |             |   |             |            |             |   |            |            |            |   |            |            |            |   |            |            |            |
| H                                                                                                                                                                                                                                                                                                                                                                                                                                                                                                                                                                                                                                                                                                                                                                                                                                                                                                                                                                                                                                                                                                                                                                                                                                                                                                                                                                                                                                                                                                                                                                                                                                                                                                                                                                                                                                                                                                                                                                                                                                                                                                                                                                                                                                                                                                                                               | -4.99190200 | 1.35769600                                                                         | -0.14908300                                                                          |             |   |            |            |             |   |            |             |             |   |            |             |             |   |            |             |             |   |            |             |             |   |            |            |             |   |            |             |             |   |            |             |            |   |            |             |             |   |            |            |             |   |            |             |             |   |            |             |             |   |             |             |             |   |             |             |             |   |             |             |            |   |             |             |             |   |             |             |             |   |             |             |             |   |             |             |             |   |             |             |            |   |             |             |             |   |             |            |             |   |             |             |             |   |             |            |             |   |             |            |             |   |             |             |             |                                                                                                                                                                                                                                                                                                                                                                                                                                                                                                                                                                                                                                                                                                                                                                                                                                                                                                                                                                                                                                                                                                                                                                                                                                                                                                                                                                                                                                                                                                                                                                                                                                                                                                                                                                                                                                                                                                                                                                                                                                                                                                                                                                                                                                                                                                                                                                                                                                                                                                                     |            |             |            |                                                                                                                                                                                                                                                                                                                                                                                                                                                                                                                                                                                                                                                                                                                                                                                                                                                                                                                                                                                                                                                                                                                                                                                                                                                                                                                                                                                                                                                                                                                                                                                                                                                                                                                                                                                                                                                                                                                                                                                                                                                                                                                                                                                                                                                                                                                                                                                                                                                                                                                                                                                               |   |            |             |             |   |            |             |             |   |            |             |             |   |            |             |             |   |            |             |             |   |            |             |             |   |            |             |            |   |            |             |            |   |            |             |             |   |            |             |             |   |            |             |             |   |             |             |             |   |             |             |             |   |             |             |             |   |             |            |             |   |             |             |             |   |             |             |             |   |             |             |             |   |             |            |             |   |             |             |             |   |             |             |             |   |             |             |             |   |             |             |             |   |             |            |             |   |             |             |             |   |             |             |            |   |             |            |             |   |             |             |             |   |             |            |            |                                                                                                                                                                                                                                                                                                                                                                                                                                                                                                                                                                                                                                                                                                                                                                                                                                                                                                                                                                                                                                                                                                                                                                                                                                                                                                                                                                                                                                                                                                                                                                                                                                                                                                                                                                                                                                                                                                                                                                                                                                                                                                                                                                                                                                                                                                                                                                                                                                                                                                                        |            |            |            |             |            |            |            |                                                                                                                                                                                                                                                                                                                                                                                                                                                                                                                                                                                                                                                                                                                                                                                                                                                                                                                                                                                                                                                                                                                                                                                                                                                                                                                                                                                                                                                                                                                                                                                                                                                                                                                                                                                                                                                                                                                                                                                                                                                                                                                                                                                                                                                                                                                                                                                                                                                                                                                                                                                             |   |            |             |             |   |            |             |             |   |            |             |             |   |            |             |             |   |            |             |             |   |            |             |             |   |            |             |            |   |            |             |            |   |            |            |             |   |            |             |             |   |            |             |             |   |             |             |             |   |             |             |             |   |             |            |             |   |             |             |             |   |             |             |             |   |             |            |             |   |             |             |             |   |             |             |             |   |             |             |             |   |             |             |             |   |             |             |             |   |             |             |             |   |             |            |             |   |             |             |             |   |             |             |            |   |             |             |             |   |             |            |             |   |            |            |            |   |            |            |            |   |            |            |            |
| H                                                                                                                                                                                                                                                                                                                                                                                                                                                                                                                                                                                                                                                                                                                                                                                                                                                                                                                                                                                                                                                                                                                                                                                                                                                                                                                                                                                                                                                                                                                                                                                                                                                                                                                                                                                                                                                                                                                                                                                                                                                                                                                                                                                                                                                                                                                                               | -5.62174200 | -0.84084300                                                                        | -1.10790000                                                                          |             |   |            |            |             |   |            |             |             |   |            |             |             |   |            |             |             |   |            |             |             |   |            |            |             |   |            |             |             |   |            |             |            |   |            |             |             |   |            |            |             |   |            |             |             |   |            |             |             |   |             |             |             |   |             |             |             |   |             |             |            |   |             |             |             |   |             |             |             |   |             |             |             |   |             |             |             |   |             |             |            |   |             |             |             |   |             |            |             |   |             |             |             |   |             |            |             |   |             |            |             |   |             |             |             |                                                                                                                                                                                                                                                                                                                                                                                                                                                                                                                                                                                                                                                                                                                                                                                                                                                                                                                                                                                                                                                                                                                                                                                                                                                                                                                                                                                                                                                                                                                                                                                                                                                                                                                                                                                                                                                                                                                                                                                                                                                                                                                                                                                                                                                                                                                                                                                                                                                                                                                     |            |             |            |                                                                                                                                                                                                                                                                                                                                                                                                                                                                                                                                                                                                                                                                                                                                                                                                                                                                                                                                                                                                                                                                                                                                                                                                                                                                                                                                                                                                                                                                                                                                                                                                                                                                                                                                                                                                                                                                                                                                                                                                                                                                                                                                                                                                                                                                                                                                                                                                                                                                                                                                                                                               |   |            |             |             |   |            |             |             |   |            |             |             |   |            |             |             |   |            |             |             |   |            |             |             |   |            |             |            |   |            |             |            |   |            |             |             |   |            |             |             |   |            |             |             |   |             |             |             |   |             |             |             |   |             |             |             |   |             |            |             |   |             |             |             |   |             |             |             |   |             |             |             |   |             |            |             |   |             |             |             |   |             |             |             |   |             |             |             |   |             |             |             |   |             |            |             |   |             |             |             |   |             |             |            |   |             |            |             |   |             |             |             |   |             |            |            |                                                                                                                                                                                                                                                                                                                                                                                                                                                                                                                                                                                                                                                                                                                                                                                                                                                                                                                                                                                                                                                                                                                                                                                                                                                                                                                                                                                                                                                                                                                                                                                                                                                                                                                                                                                                                                                                                                                                                                                                                                                                                                                                                                                                                                                                                                                                                                                                                                                                                                                        |            |            |            |             |            |            |            |                                                                                                                                                                                                                                                                                                                                                                                                                                                                                                                                                                                                                                                                                                                                                                                                                                                                                                                                                                                                                                                                                                                                                                                                                                                                                                                                                                                                                                                                                                                                                                                                                                                                                                                                                                                                                                                                                                                                                                                                                                                                                                                                                                                                                                                                                                                                                                                                                                                                                                                                                                                             |   |            |             |             |   |            |             |             |   |            |             |             |   |            |             |             |   |            |             |             |   |            |             |             |   |            |             |            |   |            |             |            |   |            |            |             |   |            |             |             |   |            |             |             |   |             |             |             |   |             |             |             |   |             |            |             |   |             |             |             |   |             |             |             |   |             |            |             |   |             |             |             |   |             |             |             |   |             |             |             |   |             |             |             |   |             |             |             |   |             |             |             |   |             |            |             |   |             |             |             |   |             |             |            |   |             |             |             |   |             |            |             |   |            |            |            |   |            |            |            |   |            |            |            |
| O                                                                                                                                                                                                                                                                                                                                                                                                                                                                                                                                                                                                                                                                                                                                                                                                                                                                                                                                                                                                                                                                                                                                                                                                                                                                                                                                                                                                                                                                                                                                                                                                                                                                                                                                                                                                                                                                                                                                                                                                                                                                                                                                                                                                                                                                                                                                               | 0.01746600  | 1.44533200                                                                         | -0.49554200                                                                          |             |   |            |            |             |   |            |             |             |   |            |             |             |   |            |             |             |   |            |             |             |   |            |            |             |   |            |             |             |   |            |             |            |   |            |             |             |   |            |            |             |   |            |             |             |   |            |             |             |   |             |             |             |   |             |             |             |   |             |             |            |   |             |             |             |   |             |             |             |   |             |             |             |   |             |             |             |   |             |             |            |   |             |             |             |   |             |            |             |   |             |             |             |   |             |            |             |   |             |            |             |   |             |             |             |                                                                                                                                                                                                                                                                                                                                                                                                                                                                                                                                                                                                                                                                                                                                                                                                                                                                                                                                                                                                                                                                                                                                                                                                                                                                                                                                                                                                                                                                                                                                                                                                                                                                                                                                                                                                                                                                                                                                                                                                                                                                                                                                                                                                                                                                                                                                                                                                                                                                                                                     |            |             |            |                                                                                                                                                                                                                                                                                                                                                                                                                                                                                                                                                                                                                                                                                                                                                                                                                                                                                                                                                                                                                                                                                                                                                                                                                                                                                                                                                                                                                                                                                                                                                                                                                                                                                                                                                                                                                                                                                                                                                                                                                                                                                                                                                                                                                                                                                                                                                                                                                                                                                                                                                                                               |   |            |             |             |   |            |             |             |   |            |             |             |   |            |             |             |   |            |             |             |   |            |             |             |   |            |             |            |   |            |             |            |   |            |             |             |   |            |             |             |   |            |             |             |   |             |             |             |   |             |             |             |   |             |             |             |   |             |            |             |   |             |             |             |   |             |             |             |   |             |             |             |   |             |            |             |   |             |             |             |   |             |             |             |   |             |             |             |   |             |             |             |   |             |            |             |   |             |             |             |   |             |             |            |   |             |            |             |   |             |             |             |   |             |            |            |                                                                                                                                                                                                                                                                                                                                                                                                                                                                                                                                                                                                                                                                                                                                                                                                                                                                                                                                                                                                                                                                                                                                                                                                                                                                                                                                                                                                                                                                                                                                                                                                                                                                                                                                                                                                                                                                                                                                                                                                                                                                                                                                                                                                                                                                                                                                                                                                                                                                                                                        |            |            |            |             |            |            |            |                                                                                                                                                                                                                                                                                                                                                                                                                                                                                                                                                                                                                                                                                                                                                                                                                                                                                                                                                                                                                                                                                                                                                                                                                                                                                                                                                                                                                                                                                                                                                                                                                                                                                                                                                                                                                                                                                                                                                                                                                                                                                                                                                                                                                                                                                                                                                                                                                                                                                                                                                                                             |   |            |             |             |   |            |             |             |   |            |             |             |   |            |             |             |   |            |             |             |   |            |             |             |   |            |             |            |   |            |             |            |   |            |            |             |   |            |             |             |   |            |             |             |   |             |             |             |   |             |             |             |   |             |            |             |   |             |             |             |   |             |             |             |   |             |            |             |   |             |             |             |   |             |             |             |   |             |             |             |   |             |             |             |   |             |             |             |   |             |             |             |   |             |            |             |   |             |             |             |   |             |             |            |   |             |             |             |   |             |            |             |   |            |            |            |   |            |            |            |   |            |            |            |
| H                                                                                                                                                                                                                                                                                                                                                                                                                                                                                                                                                                                                                                                                                                                                                                                                                                                                                                                                                                                                                                                                                                                                                                                                                                                                                                                                                                                                                                                                                                                                                                                                                                                                                                                                                                                                                                                                                                                                                                                                                                                                                                                                                                                                                                                                                                                                               | -0.69052100 | 2.24342200                                                                         | -0.68120500                                                                          |             |   |            |            |             |   |            |             |             |   |            |             |             |   |            |             |             |   |            |             |             |   |            |            |             |   |            |             |             |   |            |             |            |   |            |             |             |   |            |            |             |   |            |             |             |   |            |             |             |   |             |             |             |   |             |             |             |   |             |             |            |   |             |             |             |   |             |             |             |   |             |             |             |   |             |             |             |   |             |             |            |   |             |             |             |   |             |            |             |   |             |             |             |   |             |            |             |   |             |            |             |   |             |             |             |                                                                                                                                                                                                                                                                                                                                                                                                                                                                                                                                                                                                                                                                                                                                                                                                                                                                                                                                                                                                                                                                                                                                                                                                                                                                                                                                                                                                                                                                                                                                                                                                                                                                                                                                                                                                                                                                                                                                                                                                                                                                                                                                                                                                                                                                                                                                                                                                                                                                                                                     |            |             |            |                                                                                                                                                                                                                                                                                                                                                                                                                                                                                                                                                                                                                                                                                                                                                                                                                                                                                                                                                                                                                                                                                                                                                                                                                                                                                                                                                                                                                                                                                                                                                                                                                                                                                                                                                                                                                                                                                                                                                                                                                                                                                                                                                                                                                                                                                                                                                                                                                                                                                                                                                                                               |   |            |             |             |   |            |             |             |   |            |             |             |   |            |             |             |   |            |             |             |   |            |             |             |   |            |             |            |   |            |             |            |   |            |             |             |   |            |             |             |   |            |             |             |   |             |             |             |   |             |             |             |   |             |             |             |   |             |            |             |   |             |             |             |   |             |             |             |   |             |             |             |   |             |            |             |   |             |             |             |   |             |             |             |   |             |             |             |   |             |             |             |   |             |            |             |   |             |             |             |   |             |             |            |   |             |            |             |   |             |             |             |   |             |            |            |                                                                                                                                                                                                                                                                                                                                                                                                                                                                                                                                                                                                                                                                                                                                                                                                                                                                                                                                                                                                                                                                                                                                                                                                                                                                                                                                                                                                                                                                                                                                                                                                                                                                                                                                                                                                                                                                                                                                                                                                                                                                                                                                                                                                                                                                                                                                                                                                                                                                                                                        |            |            |            |             |            |            |            |                                                                                                                                                                                                                                                                                                                                                                                                                                                                                                                                                                                                                                                                                                                                                                                                                                                                                                                                                                                                                                                                                                                                                                                                                                                                                                                                                                                                                                                                                                                                                                                                                                                                                                                                                                                                                                                                                                                                                                                                                                                                                                                                                                                                                                                                                                                                                                                                                                                                                                                                                                                             |   |            |             |             |   |            |             |             |   |            |             |             |   |            |             |             |   |            |             |             |   |            |             |             |   |            |             |            |   |            |             |            |   |            |            |             |   |            |             |             |   |            |             |             |   |             |             |             |   |             |             |             |   |             |            |             |   |             |             |             |   |             |             |             |   |             |            |             |   |             |             |             |   |             |             |             |   |             |             |             |   |             |             |             |   |             |             |             |   |             |             |             |   |             |            |             |   |             |             |             |   |             |             |            |   |             |             |             |   |             |            |             |   |            |            |            |   |            |            |            |   |            |            |            |
| C                                                                                                                                                                                                                                                                                                                                                                                                                                                                                                                                                                                                                                                                                                                                                                                                                                                                                                                                                                                                                                                                                                                                                                                                                                                                                                                                                                                                                                                                                                                                                                                                                                                                                                                                                                                                                                                                                                                                                                                                                                                                                                                                                                                                                                                                                                                                               | -0.48390500 | 0.21615900                                                                         | 0.21754500                                                                           |             |   |            |            |             |   |            |             |             |   |            |             |             |   |            |             |             |   |            |             |             |   |            |            |             |   |            |             |             |   |            |             |            |   |            |             |             |   |            |            |             |   |            |             |             |   |            |             |             |   |             |             |             |   |             |             |             |   |             |             |            |   |             |             |             |   |             |             |             |   |             |             |             |   |             |             |             |   |             |             |            |   |             |             |             |   |             |            |             |   |             |             |             |   |             |            |             |   |             |            |             |   |             |             |             |                                                                                                                                                                                                                                                                                                                                                                                                                                                                                                                                                                                                                                                                                                                                                                                                                                                                                                                                                                                                                                                                                                                                                                                                                                                                                                                                                                                                                                                                                                                                                                                                                                                                                                                                                                                                                                                                                                                                                                                                                                                                                                                                                                                                                                                                                                                                                                                                                                                                                                                     |            |             |            |                                                                                                                                                                                                                                                                                                                                                                                                                                                                                                                                                                                                                                                                                                                                                                                                                                                                                                                                                                                                                                                                                                                                                                                                                                                                                                                                                                                                                                                                                                                                                                                                                                                                                                                                                                                                                                                                                                                                                                                                                                                                                                                                                                                                                                                                                                                                                                                                                                                                                                                                                                                               |   |            |             |             |   |            |             |             |   |            |             |             |   |            |             |             |   |            |             |             |   |            |             |             |   |            |             |            |   |            |             |            |   |            |             |             |   |            |             |             |   |            |             |             |   |             |             |             |   |             |             |             |   |             |             |             |   |             |            |             |   |             |             |             |   |             |             |             |   |             |             |             |   |             |            |             |   |             |             |             |   |             |             |             |   |             |             |             |   |             |             |             |   |             |            |             |   |             |             |             |   |             |             |            |   |             |            |             |   |             |             |             |   |             |            |            |                                                                                                                                                                                                                                                                                                                                                                                                                                                                                                                                                                                                                                                                                                                                                                                                                                                                                                                                                                                                                                                                                                                                                                                                                                                                                                                                                                                                                                                                                                                                                                                                                                                                                                                                                                                                                                                                                                                                                                                                                                                                                                                                                                                                                                                                                                                                                                                                                                                                                                                        |            |            |            |             |            |            |            |                                                                                                                                                                                                                                                                                                                                                                                                                                                                                                                                                                                                                                                                                                                                                                                                                                                                                                                                                                                                                                                                                                                                                                                                                                                                                                                                                                                                                                                                                                                                                                                                                                                                                                                                                                                                                                                                                                                                                                                                                                                                                                                                                                                                                                                                                                                                                                                                                                                                                                                                                                                             |   |            |             |             |   |            |             |             |   |            |             |             |   |            |             |             |   |            |             |             |   |            |             |             |   |            |             |            |   |            |             |            |   |            |            |             |   |            |             |             |   |            |             |             |   |             |             |             |   |             |             |             |   |             |            |             |   |             |             |             |   |             |             |             |   |             |            |             |   |             |             |             |   |             |             |             |   |             |             |             |   |             |             |             |   |             |             |             |   |             |             |             |   |             |            |             |   |             |             |             |   |             |             |            |   |             |             |             |   |             |            |             |   |            |            |            |   |            |            |            |   |            |            |            |
| C                                                                                                                                                                                                                                                                                                                                                                                                                                                                                                                                                                                                                                                                                                                                                                                                                                                                                                                                                                                                                                                                                                                                                                                                                                                                                                                                                                                                                                                                                                                                                                                                                                                                                                                                                                                                                                                                                                                                                                                                                                                                                                                                                                                                                                                                                                                                               | -0.45594800 | 0.34291900                                                                         | 1.80112600                                                                           |             |   |            |            |             |   |            |             |             |   |            |             |             |   |            |             |             |   |            |             |             |   |            |            |             |   |            |             |             |   |            |             |            |   |            |             |             |   |            |            |             |   |            |             |             |   |            |             |             |   |             |             |             |   |             |             |             |   |             |             |            |   |             |             |             |   |             |             |             |   |             |             |             |   |             |             |             |   |             |             |            |   |             |             |             |   |             |            |             |   |             |             |             |   |             |            |             |   |             |            |             |   |             |             |             |                                                                                                                                                                                                                                                                                                                                                                                                                                                                                                                                                                                                                                                                                                                                                                                                                                                                                                                                                                                                                                                                                                                                                                                                                                                                                                                                                                                                                                                                                                                                                                                                                                                                                                                                                                                                                                                                                                                                                                                                                                                                                                                                                                                                                                                                                                                                                                                                                                                                                                                     |            |             |            |                                                                                                                                                                                                                                                                                                                                                                                                                                                                                                                                                                                                                                                                                                                                                                                                                                                                                                                                                                                                                                                                                                                                                                                                                                                                                                                                                                                                                                                                                                                                                                                                                                                                                                                                                                                                                                                                                                                                                                                                                                                                                                                                                                                                                                                                                                                                                                                                                                                                                                                                                                                               |   |            |             |             |   |            |             |             |   |            |             |             |   |            |             |             |   |            |             |             |   |            |             |             |   |            |             |            |   |            |             |            |   |            |             |             |   |            |             |             |   |            |             |             |   |             |             |             |   |             |             |             |   |             |             |             |   |             |            |             |   |             |             |             |   |             |             |             |   |             |             |             |   |             |            |             |   |             |             |             |   |             |             |             |   |             |             |             |   |             |             |             |   |             |            |             |   |             |             |             |   |             |             |            |   |             |            |             |   |             |             |             |   |             |            |            |                                                                                                                                                                                                                                                                                                                                                                                                                                                                                                                                                                                                                                                                                                                                                                                                                                                                                                                                                                                                                                                                                                                                                                                                                                                                                                                                                                                                                                                                                                                                                                                                                                                                                                                                                                                                                                                                                                                                                                                                                                                                                                                                                                                                                                                                                                                                                                                                                                                                                                                        |            |            |            |             |            |            |            |                                                                                                                                                                                                                                                                                                                                                                                                                                                                                                                                                                                                                                                                                                                                                                                                                                                                                                                                                                                                                                                                                                                                                                                                                                                                                                                                                                                                                                                                                                                                                                                                                                                                                                                                                                                                                                                                                                                                                                                                                                                                                                                                                                                                                                                                                                                                                                                                                                                                                                                                                                                             |   |            |             |             |   |            |             |             |   |            |             |             |   |            |             |             |   |            |             |             |   |            |             |             |   |            |             |            |   |            |             |            |   |            |            |             |   |            |             |             |   |            |             |             |   |             |             |             |   |             |             |             |   |             |            |             |   |             |             |             |   |             |             |             |   |             |            |             |   |             |             |             |   |             |             |             |   |             |             |             |   |             |             |             |   |             |             |             |   |             |             |             |   |             |            |             |   |             |             |             |   |             |             |            |   |             |             |             |   |             |            |             |   |            |            |            |   |            |            |            |   |            |            |            |
| O                                                                                                                                                                                                                                                                                                                                                                                                                                                                                                                                                                                                                                                                                                                                                                                                                                                                                                                                                                                                                                                                                                                                                                                                                                                                                                                                                                                                                                                                                                                                                                                                                                                                                                                                                                                                                                                                                                                                                                                                                                                                                                                                                                                                                                                                                                                                               | -0.13078900 | -0.67277300                                                                        | 2.44753500                                                                           |             |   |            |            |             |   |            |             |             |   |            |             |             |   |            |             |             |   |            |             |             |   |            |            |             |   |            |             |             |   |            |             |            |   |            |             |             |   |            |            |             |   |            |             |             |   |            |             |             |   |             |             |             |   |             |             |             |   |             |             |            |   |             |             |             |   |             |             |             |   |             |             |             |   |             |             |             |   |             |             |            |   |             |             |             |   |             |            |             |   |             |             |             |   |             |            |             |   |             |            |             |   |             |             |             |                                                                                                                                                                                                                                                                                                                                                                                                                                                                                                                                                                                                                                                                                                                                                                                                                                                                                                                                                                                                                                                                                                                                                                                                                                                                                                                                                                                                                                                                                                                                                                                                                                                                                                                                                                                                                                                                                                                                                                                                                                                                                                                                                                                                                                                                                                                                                                                                                                                                                                                     |            |             |            |                                                                                                                                                                                                                                                                                                                                                                                                                                                                                                                                                                                                                                                                                                                                                                                                                                                                                                                                                                                                                                                                                                                                                                                                                                                                                                                                                                                                                                                                                                                                                                                                                                                                                                                                                                                                                                                                                                                                                                                                                                                                                                                                                                                                                                                                                                                                                                                                                                                                                                                                                                                               |   |            |             |             |   |            |             |             |   |            |             |             |   |            |             |             |   |            |             |             |   |            |             |             |   |            |             |            |   |            |             |            |   |            |             |             |   |            |             |             |   |            |             |             |   |             |             |             |   |             |             |             |   |             |             |             |   |             |            |             |   |             |             |             |   |             |             |             |   |             |             |             |   |             |            |             |   |             |             |             |   |             |             |             |   |             |             |             |   |             |             |             |   |             |            |             |   |             |             |             |   |             |             |            |   |             |            |             |   |             |             |             |   |             |            |            |                                                                                                                                                                                                                                                                                                                                                                                                                                                                                                                                                                                                                                                                                                                                                                                                                                                                                                                                                                                                                                                                                                                                                                                                                                                                                                                                                                                                                                                                                                                                                                                                                                                                                                                                                                                                                                                                                                                                                                                                                                                                                                                                                                                                                                                                                                                                                                                                                                                                                                                        |            |            |            |             |            |            |            |                                                                                                                                                                                                                                                                                                                                                                                                                                                                                                                                                                                                                                                                                                                                                                                                                                                                                                                                                                                                                                                                                                                                                                                                                                                                                                                                                                                                                                                                                                                                                                                                                                                                                                                                                                                                                                                                                                                                                                                                                                                                                                                                                                                                                                                                                                                                                                                                                                                                                                                                                                                             |   |            |             |             |   |            |             |             |   |            |             |             |   |            |             |             |   |            |             |             |   |            |             |             |   |            |             |            |   |            |             |            |   |            |            |             |   |            |             |             |   |            |             |             |   |             |             |             |   |             |             |             |   |             |            |             |   |             |             |             |   |             |             |             |   |             |            |             |   |             |             |             |   |             |             |             |   |             |             |             |   |             |             |             |   |             |             |             |   |             |             |             |   |             |            |             |   |             |             |             |   |             |             |            |   |             |             |             |   |             |            |             |   |            |            |            |   |            |            |            |   |            |            |            |
| O                                                                                                                                                                                                                                                                                                                                                                                                                                                                                                                                                                                                                                                                                                                                                                                                                                                                                                                                                                                                                                                                                                                                                                                                                                                                                                                                                                                                                                                                                                                                                                                                                                                                                                                                                                                                                                                                                                                                                                                                                                                                                                                                                                                                                                                                                                                                               | -0.80052000 | 1.44952200                                                                         | 2.26453900                                                                           |             |   |            |            |             |   |            |             |             |   |            |             |             |   |            |             |             |   |            |             |             |   |            |            |             |   |            |             |             |   |            |             |            |   |            |             |             |   |            |            |             |   |            |             |             |   |            |             |             |   |             |             |             |   |             |             |             |   |             |             |            |   |             |             |             |   |             |             |             |   |             |             |             |   |             |             |             |   |             |             |            |   |             |             |             |   |             |            |             |   |             |             |             |   |             |            |             |   |             |            |             |   |             |             |             |                                                                                                                                                                                                                                                                                                                                                                                                                                                                                                                                                                                                                                                                                                                                                                                                                                                                                                                                                                                                                                                                                                                                                                                                                                                                                                                                                                                                                                                                                                                                                                                                                                                                                                                                                                                                                                                                                                                                                                                                                                                                                                                                                                                                                                                                                                                                                                                                                                                                                                                     |            |             |            |                                                                                                                                                                                                                                                                                                                                                                                                                                                                                                                                                                                                                                                                                                                                                                                                                                                                                                                                                                                                                                                                                                                                                                                                                                                                                                                                                                                                                                                                                                                                                                                                                                                                                                                                                                                                                                                                                                                                                                                                                                                                                                                                                                                                                                                                                                                                                                                                                                                                                                                                                                                               |   |            |             |             |   |            |             |             |   |            |             |             |   |            |             |             |   |            |             |             |   |            |             |             |   |            |             |            |   |            |             |            |   |            |             |             |   |            |             |             |   |            |             |             |   |             |             |             |   |             |             |             |   |             |             |             |   |             |            |             |   |             |             |             |   |             |             |             |   |             |             |             |   |             |            |             |   |             |             |             |   |             |             |             |   |             |             |             |   |             |             |             |   |             |            |             |   |             |             |             |   |             |             |            |   |             |            |             |   |             |             |             |   |             |            |            |                                                                                                                                                                                                                                                                                                                                                                                                                                                                                                                                                                                                                                                                                                                                                                                                                                                                                                                                                                                                                                                                                                                                                                                                                                                                                                                                                                                                                                                                                                                                                                                                                                                                                                                                                                                                                                                                                                                                                                                                                                                                                                                                                                                                                                                                                                                                                                                                                                                                                                                        |            |            |            |             |            |            |            |                                                                                                                                                                                                                                                                                                                                                                                                                                                                                                                                                                                                                                                                                                                                                                                                                                                                                                                                                                                                                                                                                                                                                                                                                                                                                                                                                                                                                                                                                                                                                                                                                                                                                                                                                                                                                                                                                                                                                                                                                                                                                                                                                                                                                                                                                                                                                                                                                                                                                                                                                                                             |   |            |             |             |   |            |             |             |   |            |             |             |   |            |             |             |   |            |             |             |   |            |             |             |   |            |             |            |   |            |             |            |   |            |            |             |   |            |             |             |   |            |             |             |   |             |             |             |   |             |             |             |   |             |            |             |   |             |             |             |   |             |             |             |   |             |            |             |   |             |             |             |   |             |             |             |   |             |             |             |   |             |             |             |   |             |             |             |   |             |             |             |   |             |            |             |   |             |             |             |   |             |             |            |   |             |             |             |   |             |            |             |   |            |            |            |   |            |            |            |   |            |            |            |
| C                                                                                                                                                                                                                                                                                                                                                                                                                                                                                                                                                                                                                                                                                                                                                                                                                                                                                                                                                                                                                                                                                                                                                                                                                                                                                                                                                                                                                                                                                                                                                                                                                                                                                                                                                                                                                                                                                                                                                                                                                                                                                                                                                                                                                                                                                                                                               | 3.69888000  | 0.50395800                                                                         | -0.13667000                                                                          |             |   |            |            |             |   |            |             |             |   |            |             |             |   |            |             |             |   |            |             |             |   |            |            |             |   |            |             |             |   |            |             |            |   |            |             |             |   |            |            |             |   |            |             |             |   |            |             |             |   |             |             |             |   |             |             |             |   |             |             |            |   |             |             |             |   |             |             |             |   |             |             |             |   |             |             |             |   |             |             |            |   |             |             |             |   |             |            |             |   |             |             |             |   |             |            |             |   |             |            |             |   |             |             |             |                                                                                                                                                                                                                                                                                                                                                                                                                                                                                                                                                                                                                                                                                                                                                                                                                                                                                                                                                                                                                                                                                                                                                                                                                                                                                                                                                                                                                                                                                                                                                                                                                                                                                                                                                                                                                                                                                                                                                                                                                                                                                                                                                                                                                                                                                                                                                                                                                                                                                                                     |            |             |            |                                                                                                                                                                                                                                                                                                                                                                                                                                                                                                                                                                                                                                                                                                                                                                                                                                                                                                                                                                                                                                                                                                                                                                                                                                                                                                                                                                                                                                                                                                                                                                                                                                                                                                                                                                                                                                                                                                                                                                                                                                                                                                                                                                                                                                                                                                                                                                                                                                                                                                                                                                                               |   |            |             |             |   |            |             |             |   |            |             |             |   |            |             |             |   |            |             |             |   |            |             |             |   |            |             |            |   |            |             |            |   |            |             |             |   |            |             |             |   |            |             |             |   |             |             |             |   |             |             |             |   |             |             |             |   |             |            |             |   |             |             |             |   |             |             |             |   |             |             |             |   |             |            |             |   |             |             |             |   |             |             |             |   |             |             |             |   |             |             |             |   |             |            |             |   |             |             |             |   |             |             |            |   |             |            |             |   |             |             |             |   |             |            |            |                                                                                                                                                                                                                                                                                                                                                                                                                                                                                                                                                                                                                                                                                                                                                                                                                                                                                                                                                                                                                                                                                                                                                                                                                                                                                                                                                                                                                                                                                                                                                                                                                                                                                                                                                                                                                                                                                                                                                                                                                                                                                                                                                                                                                                                                                                                                                                                                                                                                                                                        |            |            |            |             |            |            |            |                                                                                                                                                                                                                                                                                                                                                                                                                                                                                                                                                                                                                                                                                                                                                                                                                                                                                                                                                                                                                                                                                                                                                                                                                                                                                                                                                                                                                                                                                                                                                                                                                                                                                                                                                                                                                                                                                                                                                                                                                                                                                                                                                                                                                                                                                                                                                                                                                                                                                                                                                                                             |   |            |             |             |   |            |             |             |   |            |             |             |   |            |             |             |   |            |             |             |   |            |             |             |   |            |             |            |   |            |             |            |   |            |            |             |   |            |             |             |   |            |             |             |   |             |             |             |   |             |             |             |   |             |            |             |   |             |             |             |   |             |             |             |   |             |            |             |   |             |             |             |   |             |             |             |   |             |             |             |   |             |             |             |   |             |             |             |   |             |             |             |   |             |            |             |   |             |             |             |   |             |             |            |   |             |             |             |   |             |            |             |   |            |            |            |   |            |            |            |   |            |            |            |
| C                                                                                                                                                                                                                                                                                                                                                                                                                                                                                                                                                                                                                                                                                                                                                                                                                                                                                                                                                                                                                                                                                                                                                                                                                                                                                                                                                                                                                                                                                                                                                                                                                                                                                                                                                                                                                                                                                                                                                                                                                                                                                                                                                                                                                                                                                                                                               | 2.32551300  | 0.49268000                                                                         | -0.34421500                                                                          |             |   |            |            |             |   |            |             |             |   |            |             |             |   |            |             |             |   |            |             |             |   |            |            |             |   |            |             |             |   |            |             |            |   |            |             |             |   |            |            |             |   |            |             |             |   |            |             |             |   |             |             |             |   |             |             |             |   |             |             |            |   |             |             |             |   |             |             |             |   |             |             |             |   |             |             |             |   |             |             |            |   |             |             |             |   |             |            |             |   |             |             |             |   |             |            |             |   |             |            |             |   |             |             |             |                                                                                                                                                                                                                                                                                                                                                                                                                                                                                                                                                                                                                                                                                                                                                                                                                                                                                                                                                                                                                                                                                                                                                                                                                                                                                                                                                                                                                                                                                                                                                                                                                                                                                                                                                                                                                                                                                                                                                                                                                                                                                                                                                                                                                                                                                                                                                                                                                                                                                                                     |            |             |            |                                                                                                                                                                                                                                                                                                                                                                                                                                                                                                                                                                                                                                                                                                                                                                                                                                                                                                                                                                                                                                                                                                                                                                                                                                                                                                                                                                                                                                                                                                                                                                                                                                                                                                                                                                                                                                                                                                                                                                                                                                                                                                                                                                                                                                                                                                                                                                                                                                                                                                                                                                                               |   |            |             |             |   |            |             |             |   |            |             |             |   |            |             |             |   |            |             |             |   |            |             |             |   |            |             |            |   |            |             |            |   |            |             |             |   |            |             |             |   |            |             |             |   |             |             |             |   |             |             |             |   |             |             |             |   |             |            |             |   |             |             |             |   |             |             |             |   |             |             |             |   |             |            |             |   |             |             |             |   |             |             |             |   |             |             |             |   |             |             |             |   |             |            |             |   |             |             |             |   |             |             |            |   |             |            |             |   |             |             |             |   |             |            |            |                                                                                                                                                                                                                                                                                                                                                                                                                                                                                                                                                                                                                                                                                                                                                                                                                                                                                                                                                                                                                                                                                                                                                                                                                                                                                                                                                                                                                                                                                                                                                                                                                                                                                                                                                                                                                                                                                                                                                                                                                                                                                                                                                                                                                                                                                                                                                                                                                                                                                                                        |            |            |            |             |            |            |            |                                                                                                                                                                                                                                                                                                                                                                                                                                                                                                                                                                                                                                                                                                                                                                                                                                                                                                                                                                                                                                                                                                                                                                                                                                                                                                                                                                                                                                                                                                                                                                                                                                                                                                                                                                                                                                                                                                                                                                                                                                                                                                                                                                                                                                                                                                                                                                                                                                                                                                                                                                                             |   |            |             |             |   |            |             |             |   |            |             |             |   |            |             |             |   |            |             |             |   |            |             |             |   |            |             |            |   |            |             |            |   |            |            |             |   |            |             |             |   |            |             |             |   |             |             |             |   |             |             |             |   |             |            |             |   |             |             |             |   |             |             |             |   |             |            |             |   |             |             |             |   |             |             |             |   |             |             |             |   |             |             |             |   |             |             |             |   |             |             |             |   |             |            |             |   |             |             |             |   |             |             |            |   |             |             |             |   |             |            |             |   |            |            |            |   |            |            |            |   |            |            |            |
| C                                                                                                                                                                                                                                                                                                                                                                                                                                                                                                                                                                                                                                                                                                                                                                                                                                                                                                                                                                                                                                                                                                                                                                                                                                                                                                                                                                                                                                                                                                                                                                                                                                                                                                                                                                                                                                                                                                                                                                                                                                                                                                                                                                                                                                                                                                                                               | 1.67855200  | -0.75087700                                                                        | -0.42202300                                                                          |             |   |            |            |             |   |            |             |             |   |            |             |             |   |            |             |             |   |            |             |             |   |            |            |             |   |            |             |             |   |            |             |            |   |            |             |             |   |            |            |             |   |            |             |             |   |            |             |             |   |             |             |             |   |             |             |             |   |             |             |            |   |             |             |             |   |             |             |             |   |             |             |             |   |             |             |             |   |             |             |            |   |             |             |             |   |             |            |             |   |             |             |             |   |             |            |             |   |             |            |             |   |             |             |             |                                                                                                                                                                                                                                                                                                                                                                                                                                                                                                                                                                                                                                                                                                                                                                                                                                                                                                                                                                                                                                                                                                                                                                                                                                                                                                                                                                                                                                                                                                                                                                                                                                                                                                                                                                                                                                                                                                                                                                                                                                                                                                                                                                                                                                                                                                                                                                                                                                                                                                                     |            |             |            |                                                                                                                                                                                                                                                                                                                                                                                                                                                                                                                                                                                                                                                                                                                                                                                                                                                                                                                                                                                                                                                                                                                                                                                                                                                                                                                                                                                                                                                                                                                                                                                                                                                                                                                                                                                                                                                                                                                                                                                                                                                                                                                                                                                                                                                                                                                                                                                                                                                                                                                                                                                               |   |            |             |             |   |            |             |             |   |            |             |             |   |            |             |             |   |            |             |             |   |            |             |             |   |            |             |            |   |            |             |            |   |            |             |             |   |            |             |             |   |            |             |             |   |             |             |             |   |             |             |             |   |             |             |             |   |             |            |             |   |             |             |             |   |             |             |             |   |             |             |             |   |             |            |             |   |             |             |             |   |             |             |             |   |             |             |             |   |             |             |             |   |             |            |             |   |             |             |             |   |             |             |            |   |             |            |             |   |             |             |             |   |             |            |            |                                                                                                                                                                                                                                                                                                                                                                                                                                                                                                                                                                                                                                                                                                                                                                                                                                                                                                                                                                                                                                                                                                                                                                                                                                                                                                                                                                                                                                                                                                                                                                                                                                                                                                                                                                                                                                                                                                                                                                                                                                                                                                                                                                                                                                                                                                                                                                                                                                                                                                                        |            |            |            |             |            |            |            |                                                                                                                                                                                                                                                                                                                                                                                                                                                                                                                                                                                                                                                                                                                                                                                                                                                                                                                                                                                                                                                                                                                                                                                                                                                                                                                                                                                                                                                                                                                                                                                                                                                                                                                                                                                                                                                                                                                                                                                                                                                                                                                                                                                                                                                                                                                                                                                                                                                                                                                                                                                             |   |            |             |             |   |            |             |             |   |            |             |             |   |            |             |             |   |            |             |             |   |            |             |             |   |            |             |            |   |            |             |            |   |            |            |             |   |            |             |             |   |            |             |             |   |             |             |             |   |             |             |             |   |             |            |             |   |             |             |             |   |             |             |             |   |             |            |             |   |             |             |             |   |             |             |             |   |             |             |             |   |             |             |             |   |             |             |             |   |             |             |             |   |             |            |             |   |             |             |             |   |             |             |            |   |             |             |             |   |             |            |             |   |            |            |            |   |            |            |            |   |            |            |            |
| C                                                                                                                                                                                                                                                                                                                                                                                                                                                                                                                                                                                                                                                                                                                                                                                                                                                                                                                                                                                                                                                                                                                                                                                                                                                                                                                                                                                                                                                                                                                                                                                                                                                                                                                                                                                                                                                                                                                                                                                                                                                                                                                                                                                                                                                                                                                                               | 2.40149500  | -1.93230500                                                                        | -0.29328000                                                                          |             |   |            |            |             |   |            |             |             |   |            |             |             |   |            |             |             |   |            |             |             |   |            |            |             |   |            |             |             |   |            |             |            |   |            |             |             |   |            |            |             |   |            |             |             |   |            |             |             |   |             |             |             |   |             |             |             |   |             |             |            |   |             |             |             |   |             |             |             |   |             |             |             |   |             |             |             |   |             |             |            |   |             |             |             |   |             |            |             |   |             |             |             |   |             |            |             |   |             |            |             |   |             |             |             |                                                                                                                                                                                                                                                                                                                                                                                                                                                                                                                                                                                                                                                                                                                                                                                                                                                                                                                                                                                                                                                                                                                                                                                                                                                                                                                                                                                                                                                                                                                                                                                                                                                                                                                                                                                                                                                                                                                                                                                                                                                                                                                                                                                                                                                                                                                                                                                                                                                                                                                     |            |             |            |                                                                                                                                                                                                                                                                                                                                                                                                                                                                                                                                                                                                                                                                                                                                                                                                                                                                                                                                                                                                                                                                                                                                                                                                                                                                                                                                                                                                                                                                                                                                                                                                                                                                                                                                                                                                                                                                                                                                                                                                                                                                                                                                                                                                                                                                                                                                                                                                                                                                                                                                                                                               |   |            |             |             |   |            |             |             |   |            |             |             |   |            |             |             |   |            |             |             |   |            |             |             |   |            |             |            |   |            |             |            |   |            |             |             |   |            |             |             |   |            |             |             |   |             |             |             |   |             |             |             |   |             |             |             |   |             |            |             |   |             |             |             |   |             |             |             |   |             |             |             |   |             |            |             |   |             |             |             |   |             |             |             |   |             |             |             |   |             |             |             |   |             |            |             |   |             |             |             |   |             |             |            |   |             |            |             |   |             |             |             |   |             |            |            |                                                                                                                                                                                                                                                                                                                                                                                                                                                                                                                                                                                                                                                                                                                                                                                                                                                                                                                                                                                                                                                                                                                                                                                                                                                                                                                                                                                                                                                                                                                                                                                                                                                                                                                                                                                                                                                                                                                                                                                                                                                                                                                                                                                                                                                                                                                                                                                                                                                                                                                        |            |            |            |             |            |            |            |                                                                                                                                                                                                                                                                                                                                                                                                                                                                                                                                                                                                                                                                                                                                                                                                                                                                                                                                                                                                                                                                                                                                                                                                                                                                                                                                                                                                                                                                                                                                                                                                                                                                                                                                                                                                                                                                                                                                                                                                                                                                                                                                                                                                                                                                                                                                                                                                                                                                                                                                                                                             |   |            |             |             |   |            |             |             |   |            |             |             |   |            |             |             |   |            |             |             |   |            |             |             |   |            |             |            |   |            |             |            |   |            |            |             |   |            |             |             |   |            |             |             |   |             |             |             |   |             |             |             |   |             |            |             |   |             |             |             |   |             |             |             |   |             |            |             |   |             |             |             |   |             |             |             |   |             |             |             |   |             |             |             |   |             |             |             |   |             |             |             |   |             |            |             |   |             |             |             |   |             |             |            |   |             |             |             |   |             |            |             |   |            |            |            |   |            |            |            |   |            |            |            |
| C                                                                                                                                                                                                                                                                                                                                                                                                                                                                                                                                                                                                                                                                                                                                                                                                                                                                                                                                                                                                                                                                                                                                                                                                                                                                                                                                                                                                                                                                                                                                                                                                                                                                                                                                                                                                                                                                                                                                                                                                                                                                                                                                                                                                                                                                                                                                               | 3.77656600  | -1.89164200                                                                        | -0.08556600                                                                          |             |   |            |            |             |   |            |             |             |   |            |             |             |   |            |             |             |   |            |             |             |   |            |            |             |   |            |             |             |   |            |             |            |   |            |             |             |   |            |            |             |   |            |             |             |   |            |             |             |   |             |             |             |   |             |             |             |   |             |             |            |   |             |             |             |   |             |             |             |   |             |             |             |   |             |             |             |   |             |             |            |   |             |             |             |   |             |            |             |   |             |             |             |   |             |            |             |   |             |            |             |   |             |             |             |                                                                                                                                                                                                                                                                                                                                                                                                                                                                                                                                                                                                                                                                                                                                                                                                                                                                                                                                                                                                                                                                                                                                                                                                                                                                                                                                                                                                                                                                                                                                                                                                                                                                                                                                                                                                                                                                                                                                                                                                                                                                                                                                                                                                                                                                                                                                                                                                                                                                                                                     |            |             |            |                                                                                                                                                                                                                                                                                                                                                                                                                                                                                                                                                                                                                                                                                                                                                                                                                                                                                                                                                                                                                                                                                                                                                                                                                                                                                                                                                                                                                                                                                                                                                                                                                                                                                                                                                                                                                                                                                                                                                                                                                                                                                                                                                                                                                                                                                                                                                                                                                                                                                                                                                                                               |   |            |             |             |   |            |             |             |   |            |             |             |   |            |             |             |   |            |             |             |   |            |             |             |   |            |             |            |   |            |             |            |   |            |             |             |   |            |             |             |   |            |             |             |   |             |             |             |   |             |             |             |   |             |             |             |   |             |            |             |   |             |             |             |   |             |             |             |   |             |             |             |   |             |            |             |   |             |             |             |   |             |             |             |   |             |             |             |   |             |             |             |   |             |            |             |   |             |             |             |   |             |             |            |   |             |            |             |   |             |             |             |   |             |            |            |                                                                                                                                                                                                                                                                                                                                                                                                                                                                                                                                                                                                                                                                                                                                                                                                                                                                                                                                                                                                                                                                                                                                                                                                                                                                                                                                                                                                                                                                                                                                                                                                                                                                                                                                                                                                                                                                                                                                                                                                                                                                                                                                                                                                                                                                                                                                                                                                                                                                                                                        |            |            |            |             |            |            |            |                                                                                                                                                                                                                                                                                                                                                                                                                                                                                                                                                                                                                                                                                                                                                                                                                                                                                                                                                                                                                                                                                                                                                                                                                                                                                                                                                                                                                                                                                                                                                                                                                                                                                                                                                                                                                                                                                                                                                                                                                                                                                                                                                                                                                                                                                                                                                                                                                                                                                                                                                                                             |   |            |             |             |   |            |             |             |   |            |             |             |   |            |             |             |   |            |             |             |   |            |             |             |   |            |             |            |   |            |             |            |   |            |            |             |   |            |             |             |   |            |             |             |   |             |             |             |   |             |             |             |   |             |            |             |   |             |             |             |   |             |             |             |   |             |            |             |   |             |             |             |   |             |             |             |   |             |             |             |   |             |             |             |   |             |             |             |   |             |             |             |   |             |            |             |   |             |             |             |   |             |             |            |   |             |             |             |   |             |            |             |   |            |            |            |   |            |            |            |   |            |            |            |
| C                                                                                                                                                                                                                                                                                                                                                                                                                                                                                                                                                                                                                                                                                                                                                                                                                                                                                                                                                                                                                                                                                                                                                                                                                                                                                                                                                                                                                                                                                                                                                                                                                                                                                                                                                                                                                                                                                                                                                                                                                                                                                                                                                                                                                                                                                                                                               | 4.43081200  | -0.67344700                                                                        | -0.00296500                                                                          |             |   |            |            |             |   |            |             |             |   |            |             |             |   |            |             |             |   |            |             |             |   |            |            |             |   |            |             |             |   |            |             |            |   |            |             |             |   |            |            |             |   |            |             |             |   |            |             |             |   |             |             |             |   |             |             |             |   |             |             |            |   |             |             |             |   |             |             |             |   |             |             |             |   |             |             |             |   |             |             |            |   |             |             |             |   |             |            |             |   |             |             |             |   |             |            |             |   |             |            |             |   |             |             |             |                                                                                                                                                                                                                                                                                                                                                                                                                                                                                                                                                                                                                                                                                                                                                                                                                                                                                                                                                                                                                                                                                                                                                                                                                                                                                                                                                                                                                                                                                                                                                                                                                                                                                                                                                                                                                                                                                                                                                                                                                                                                                                                                                                                                                                                                                                                                                                                                                                                                                                                     |            |             |            |                                                                                                                                                                                                                                                                                                                                                                                                                                                                                                                                                                                                                                                                                                                                                                                                                                                                                                                                                                                                                                                                                                                                                                                                                                                                                                                                                                                                                                                                                                                                                                                                                                                                                                                                                                                                                                                                                                                                                                                                                                                                                                                                                                                                                                                                                                                                                                                                                                                                                                                                                                                               |   |            |             |             |   |            |             |             |   |            |             |             |   |            |             |             |   |            |             |             |   |            |             |             |   |            |             |            |   |            |             |            |   |            |             |             |   |            |             |             |   |            |             |             |   |             |             |             |   |             |             |             |   |             |             |             |   |             |            |             |   |             |             |             |   |             |             |             |   |             |             |             |   |             |            |             |   |             |             |             |   |             |             |             |   |             |             |             |   |             |             |             |   |             |            |             |   |             |             |             |   |             |             |            |   |             |            |             |   |             |             |             |   |             |            |            |                                                                                                                                                                                                                                                                                                                                                                                                                                                                                                                                                                                                                                                                                                                                                                                                                                                                                                                                                                                                                                                                                                                                                                                                                                                                                                                                                                                                                                                                                                                                                                                                                                                                                                                                                                                                                                                                                                                                                                                                                                                                                                                                                                                                                                                                                                                                                                                                                                                                                                                        |            |            |            |             |            |            |            |                                                                                                                                                                                                                                                                                                                                                                                                                                                                                                                                                                                                                                                                                                                                                                                                                                                                                                                                                                                                                                                                                                                                                                                                                                                                                                                                                                                                                                                                                                                                                                                                                                                                                                                                                                                                                                                                                                                                                                                                                                                                                                                                                                                                                                                                                                                                                                                                                                                                                                                                                                                             |   |            |             |             |   |            |             |             |   |            |             |             |   |            |             |             |   |            |             |             |   |            |             |             |   |            |             |            |   |            |             |            |   |            |            |             |   |            |             |             |   |            |             |             |   |             |             |             |   |             |             |             |   |             |            |             |   |             |             |             |   |             |             |             |   |             |            |             |   |             |             |             |   |             |             |             |   |             |             |             |   |             |             |             |   |             |             |             |   |             |             |             |   |             |            |             |   |             |             |             |   |             |             |            |   |             |             |             |   |             |            |             |   |            |            |            |   |            |            |            |   |            |            |            |
| H                                                                                                                                                                                                                                                                                                                                                                                                                                                                                                                                                                                                                                                                                                                                                                                                                                                                                                                                                                                                                                                                                                                                                                                                                                                                                                                                                                                                                                                                                                                                                                                                                                                                                                                                                                                                                                                                                                                                                                                                                                                                                                                                                                                                                                                                                                                                               | 4.18627100  | 1.47025600                                                                         | -0.09274400                                                                          |             |   |            |            |             |   |            |             |             |   |            |             |             |   |            |             |             |   |            |             |             |   |            |            |             |   |            |             |             |   |            |             |            |   |            |             |             |   |            |            |             |   |            |             |             |   |            |             |             |   |             |             |             |   |             |             |             |   |             |             |            |   |             |             |             |   |             |             |             |   |             |             |             |   |             |             |             |   |             |             |            |   |             |             |             |   |             |            |             |   |             |             |             |   |             |            |             |   |             |            |             |   |             |             |             |                                                                                                                                                                                                                                                                                                                                                                                                                                                                                                                                                                                                                                                                                                                                                                                                                                                                                                                                                                                                                                                                                                                                                                                                                                                                                                                                                                                                                                                                                                                                                                                                                                                                                                                                                                                                                                                                                                                                                                                                                                                                                                                                                                                                                                                                                                                                                                                                                                                                                                                     |            |             |            |                                                                                                                                                                                                                                                                                                                                                                                                                                                                                                                                                                                                                                                                                                                                                                                                                                                                                                                                                                                                                                                                                                                                                                                                                                                                                                                                                                                                                                                                                                                                                                                                                                                                                                                                                                                                                                                                                                                                                                                                                                                                                                                                                                                                                                                                                                                                                                                                                                                                                                                                                                                               |   |            |             |             |   |            |             |             |   |            |             |             |   |            |             |             |   |            |             |             |   |            |             |             |   |            |             |            |   |            |             |            |   |            |             |             |   |            |             |             |   |            |             |             |   |             |             |             |   |             |             |             |   |             |             |             |   |             |            |             |   |             |             |             |   |             |             |             |   |             |             |             |   |             |            |             |   |             |             |             |   |             |             |             |   |             |             |             |   |             |             |             |   |             |            |             |   |             |             |             |   |             |             |            |   |             |            |             |   |             |             |             |   |             |            |            |                                                                                                                                                                                                                                                                                                                                                                                                                                                                                                                                                                                                                                                                                                                                                                                                                                                                                                                                                                                                                                                                                                                                                                                                                                                                                                                                                                                                                                                                                                                                                                                                                                                                                                                                                                                                                                                                                                                                                                                                                                                                                                                                                                                                                                                                                                                                                                                                                                                                                                                        |            |            |            |             |            |            |            |                                                                                                                                                                                                                                                                                                                                                                                                                                                                                                                                                                                                                                                                                                                                                                                                                                                                                                                                                                                                                                                                                                                                                                                                                                                                                                                                                                                                                                                                                                                                                                                                                                                                                                                                                                                                                                                                                                                                                                                                                                                                                                                                                                                                                                                                                                                                                                                                                                                                                                                                                                                             |   |            |             |             |   |            |             |             |   |            |             |             |   |            |             |             |   |            |             |             |   |            |             |             |   |            |             |            |   |            |             |            |   |            |            |             |   |            |             |             |   |            |             |             |   |             |             |             |   |             |             |             |   |             |            |             |   |             |             |             |   |             |             |             |   |             |            |             |   |             |             |             |   |             |             |             |   |             |             |             |   |             |             |             |   |             |             |             |   |             |             |             |   |             |            |             |   |             |             |             |   |             |             |            |   |             |             |             |   |             |            |             |   |            |            |            |   |            |            |            |   |            |            |            |
| H                                                                                                                                                                                                                                                                                                                                                                                                                                                                                                                                                                                                                                                                                                                                                                                                                                                                                                                                                                                                                                                                                                                                                                                                                                                                                                                                                                                                                                                                                                                                                                                                                                                                                                                                                                                                                                                                                                                                                                                                                                                                                                                                                                                                                                                                                                                                               | 1.87514000  | -2.87688800                                                                        | -0.35950500                                                                          |             |   |            |            |             |   |            |             |             |   |            |             |             |   |            |             |             |   |            |             |             |   |            |            |             |   |            |             |             |   |            |             |            |   |            |             |             |   |            |            |             |   |            |             |             |   |            |             |             |   |             |             |             |   |             |             |             |   |             |             |            |   |             |             |             |   |             |             |             |   |             |             |             |   |             |             |             |   |             |             |            |   |             |             |             |   |             |            |             |   |             |             |             |   |             |            |             |   |             |            |             |   |             |             |             |                                                                                                                                                                                                                                                                                                                                                                                                                                                                                                                                                                                                                                                                                                                                                                                                                                                                                                                                                                                                                                                                                                                                                                                                                                                                                                                                                                                                                                                                                                                                                                                                                                                                                                                                                                                                                                                                                                                                                                                                                                                                                                                                                                                                                                                                                                                                                                                                                                                                                                                     |            |             |            |                                                                                                                                                                                                                                                                                                                                                                                                                                                                                                                                                                                                                                                                                                                                                                                                                                                                                                                                                                                                                                                                                                                                                                                                                                                                                                                                                                                                                                                                                                                                                                                                                                                                                                                                                                                                                                                                                                                                                                                                                                                                                                                                                                                                                                                                                                                                                                                                                                                                                                                                                                                               |   |            |             |             |   |            |             |             |   |            |             |             |   |            |             |             |   |            |             |             |   |            |             |             |   |            |             |            |   |            |             |            |   |            |             |             |   |            |             |             |   |            |             |             |   |             |             |             |   |             |             |             |   |             |             |             |   |             |            |             |   |             |             |             |   |             |             |             |   |             |             |             |   |             |            |             |   |             |             |             |   |             |             |             |   |             |             |             |   |             |             |             |   |             |            |             |   |             |             |             |   |             |             |            |   |             |            |             |   |             |             |             |   |             |            |            |                                                                                                                                                                                                                                                                                                                                                                                                                                                                                                                                                                                                                                                                                                                                                                                                                                                                                                                                                                                                                                                                                                                                                                                                                                                                                                                                                                                                                                                                                                                                                                                                                                                                                                                                                                                                                                                                                                                                                                                                                                                                                                                                                                                                                                                                                                                                                                                                                                                                                                                        |            |            |            |             |            |            |            |                                                                                                                                                                                                                                                                                                                                                                                                                                                                                                                                                                                                                                                                                                                                                                                                                                                                                                                                                                                                                                                                                                                                                                                                                                                                                                                                                                                                                                                                                                                                                                                                                                                                                                                                                                                                                                                                                                                                                                                                                                                                                                                                                                                                                                                                                                                                                                                                                                                                                                                                                                                             |   |            |             |             |   |            |             |             |   |            |             |             |   |            |             |             |   |            |             |             |   |            |             |             |   |            |             |            |   |            |             |            |   |            |            |             |   |            |             |             |   |            |             |             |   |             |             |             |   |             |             |             |   |             |            |             |   |             |             |             |   |             |             |             |   |             |            |             |   |             |             |             |   |             |             |             |   |             |             |             |   |             |             |             |   |             |             |             |   |             |             |             |   |             |            |             |   |             |             |             |   |             |             |            |   |             |             |             |   |             |            |             |   |            |            |            |   |            |            |            |   |            |            |            |
| H                                                                                                                                                                                                                                                                                                                                                                                                                                                                                                                                                                                                                                                                                                                                                                                                                                                                                                                                                                                                                                                                                                                                                                                                                                                                                                                                                                                                                                                                                                                                                                                                                                                                                                                                                                                                                                                                                                                                                                                                                                                                                                                                                                                                                                                                                                                                               | 4.32861500  | -2.81866200                                                                        | 0.01463000                                                                           |             |   |            |            |             |   |            |             |             |   |            |             |             |   |            |             |             |   |            |             |             |   |            |            |             |   |            |             |             |   |            |             |            |   |            |             |             |   |            |            |             |   |            |             |             |   |            |             |             |   |             |             |             |   |             |             |             |   |             |             |            |   |             |             |             |   |             |             |             |   |             |             |             |   |             |             |             |   |             |             |            |   |             |             |             |   |             |            |             |   |             |             |             |   |             |            |             |   |             |            |             |   |             |             |             |                                                                                                                                                                                                                                                                                                                                                                                                                                                                                                                                                                                                                                                                                                                                                                                                                                                                                                                                                                                                                                                                                                                                                                                                                                                                                                                                                                                                                                                                                                                                                                                                                                                                                                                                                                                                                                                                                                                                                                                                                                                                                                                                                                                                                                                                                                                                                                                                                                                                                                                     |            |             |            |                                                                                                                                                                                                                                                                                                                                                                                                                                                                                                                                                                                                                                                                                                                                                                                                                                                                                                                                                                                                                                                                                                                                                                                                                                                                                                                                                                                                                                                                                                                                                                                                                                                                                                                                                                                                                                                                                                                                                                                                                                                                                                                                                                                                                                                                                                                                                                                                                                                                                                                                                                                               |   |            |             |             |   |            |             |             |   |            |             |             |   |            |             |             |   |            |             |             |   |            |             |             |   |            |             |            |   |            |             |            |   |            |             |             |   |            |             |             |   |            |             |             |   |             |             |             |   |             |             |             |   |             |             |             |   |             |            |             |   |             |             |             |   |             |             |             |   |             |             |             |   |             |            |             |   |             |             |             |   |             |             |             |   |             |             |             |   |             |             |             |   |             |            |             |   |             |             |             |   |             |             |            |   |             |            |             |   |             |             |             |   |             |            |            |                                                                                                                                                                                                                                                                                                                                                                                                                                                                                                                                                                                                                                                                                                                                                                                                                                                                                                                                                                                                                                                                                                                                                                                                                                                                                                                                                                                                                                                                                                                                                                                                                                                                                                                                                                                                                                                                                                                                                                                                                                                                                                                                                                                                                                                                                                                                                                                                                                                                                                                        |            |            |            |             |            |            |            |                                                                                                                                                                                                                                                                                                                                                                                                                                                                                                                                                                                                                                                                                                                                                                                                                                                                                                                                                                                                                                                                                                                                                                                                                                                                                                                                                                                                                                                                                                                                                                                                                                                                                                                                                                                                                                                                                                                                                                                                                                                                                                                                                                                                                                                                                                                                                                                                                                                                                                                                                                                             |   |            |             |             |   |            |             |             |   |            |             |             |   |            |             |             |   |            |             |             |   |            |             |             |   |            |             |            |   |            |             |            |   |            |            |             |   |            |             |             |   |            |             |             |   |             |             |             |   |             |             |             |   |             |            |             |   |             |             |             |   |             |             |             |   |             |            |             |   |             |             |             |   |             |             |             |   |             |             |             |   |             |             |             |   |             |             |             |   |             |             |             |   |             |            |             |   |             |             |             |   |             |             |            |   |             |             |             |   |             |            |             |   |            |            |            |   |            |            |            |   |            |            |            |
| H                                                                                                                                                                                                                                                                                                                                                                                                                                                                                                                                                                                                                                                                                                                                                                                                                                                                                                                                                                                                                                                                                                                                                                                                                                                                                                                                                                                                                                                                                                                                                                                                                                                                                                                                                                                                                                                                                                                                                                                                                                                                                                                                                                                                                                                                                                                                               | 5.50117800  | -0.63625300                                                                        | 0.15930000                                                                           |             |   |            |            |             |   |            |             |             |   |            |             |             |   |            |             |             |   |            |             |             |   |            |            |             |   |            |             |             |   |            |             |            |   |            |             |             |   |            |            |             |   |            |             |             |   |            |             |             |   |             |             |             |   |             |             |             |   |             |             |            |   |             |             |             |   |             |             |             |   |             |             |             |   |             |             |             |   |             |             |            |   |             |             |             |   |             |            |             |   |             |             |             |   |             |            |             |   |             |            |             |   |             |             |             |                                                                                                                                                                                                                                                                                                                                                                                                                                                                                                                                                                                                                                                                                                                                                                                                                                                                                                                                                                                                                                                                                                                                                                                                                                                                                                                                                                                                                                                                                                                                                                                                                                                                                                                                                                                                                                                                                                                                                                                                                                                                                                                                                                                                                                                                                                                                                                                                                                                                                                                     |            |             |            |                                                                                                                                                                                                                                                                                                                                                                                                                                                                                                                                                                                                                                                                                                                                                                                                                                                                                                                                                                                                                                                                                                                                                                                                                                                                                                                                                                                                                                                                                                                                                                                                                                                                                                                                                                                                                                                                                                                                                                                                                                                                                                                                                                                                                                                                                                                                                                                                                                                                                                                                                                                               |   |            |             |             |   |            |             |             |   |            |             |             |   |            |             |             |   |            |             |             |   |            |             |             |   |            |             |            |   |            |             |            |   |            |             |             |   |            |             |             |   |            |             |             |   |             |             |             |   |             |             |             |   |             |             |             |   |             |            |             |   |             |             |             |   |             |             |             |   |             |             |             |   |             |            |             |   |             |             |             |   |             |             |             |   |             |             |             |   |             |             |             |   |             |            |             |   |             |             |             |   |             |             |            |   |             |            |             |   |             |             |             |   |             |            |            |                                                                                                                                                                                                                                                                                                                                                                                                                                                                                                                                                                                                                                                                                                                                                                                                                                                                                                                                                                                                                                                                                                                                                                                                                                                                                                                                                                                                                                                                                                                                                                                                                                                                                                                                                                                                                                                                                                                                                                                                                                                                                                                                                                                                                                                                                                                                                                                                                                                                                                                        |            |            |            |             |            |            |            |                                                                                                                                                                                                                                                                                                                                                                                                                                                                                                                                                                                                                                                                                                                                                                                                                                                                                                                                                                                                                                                                                                                                                                                                                                                                                                                                                                                                                                                                                                                                                                                                                                                                                                                                                                                                                                                                                                                                                                                                                                                                                                                                                                                                                                                                                                                                                                                                                                                                                                                                                                                             |   |            |             |             |   |            |             |             |   |            |             |             |   |            |             |             |   |            |             |             |   |            |             |             |   |            |             |            |   |            |             |            |   |            |            |             |   |            |             |             |   |            |             |             |   |             |             |             |   |             |             |             |   |             |            |             |   |             |             |             |   |             |             |             |   |             |            |             |   |             |             |             |   |             |             |             |   |             |             |             |   |             |             |             |   |             |             |             |   |             |             |             |   |             |            |             |   |             |             |             |   |             |             |            |   |             |             |             |   |             |            |             |   |            |            |            |   |            |            |            |   |            |            |            |
| C                                                                                                                                                                                                                                                                                                                                                                                                                                                                                                                                                                                                                                                                                                                                                                                                                                                                                                                                                                                                                                                                                                                                                                                                                                                                                                                                                                                                                                                                                                                                                                                                                                                                                                                                                                                                                                                                                                                                                                                                                                                                                                                                                                                                                                                                                                                                               | 1.53933800  | 1.75138900                                                                         | -0.51277900                                                                          |             |   |            |            |             |   |            |             |             |   |            |             |             |   |            |             |             |   |            |             |             |   |            |            |             |   |            |             |             |   |            |             |            |   |            |             |             |   |            |            |             |   |            |             |             |   |            |             |             |   |             |             |             |   |             |             |             |   |             |             |            |   |             |             |             |   |             |             |             |   |             |             |             |   |             |             |             |   |             |             |            |   |             |             |             |   |             |            |             |   |             |             |             |   |             |            |             |   |             |            |             |   |             |             |             |                                                                                                                                                                                                                                                                                                                                                                                                                                                                                                                                                                                                                                                                                                                                                                                                                                                                                                                                                                                                                                                                                                                                                                                                                                                                                                                                                                                                                                                                                                                                                                                                                                                                                                                                                                                                                                                                                                                                                                                                                                                                                                                                                                                                                                                                                                                                                                                                                                                                                                                     |            |             |            |                                                                                                                                                                                                                                                                                                                                                                                                                                                                                                                                                                                                                                                                                                                                                                                                                                                                                                                                                                                                                                                                                                                                                                                                                                                                                                                                                                                                                                                                                                                                                                                                                                                                                                                                                                                                                                                                                                                                                                                                                                                                                                                                                                                                                                                                                                                                                                                                                                                                                                                                                                                               |   |            |             |             |   |            |             |             |   |            |             |             |   |            |             |             |   |            |             |             |   |            |             |             |   |            |             |            |   |            |             |            |   |            |             |             |   |            |             |             |   |            |             |             |   |             |             |             |   |             |             |             |   |             |             |             |   |             |            |             |   |             |             |             |   |             |             |             |   |             |             |             |   |             |            |             |   |             |             |             |   |             |             |             |   |             |             |             |   |             |             |             |   |             |            |             |   |             |             |             |   |             |             |            |   |             |            |             |   |             |             |             |   |             |            |            |                                                                                                                                                                                                                                                                                                                                                                                                                                                                                                                                                                                                                                                                                                                                                                                                                                                                                                                                                                                                                                                                                                                                                                                                                                                                                                                                                                                                                                                                                                                                                                                                                                                                                                                                                                                                                                                                                                                                                                                                                                                                                                                                                                                                                                                                                                                                                                                                                                                                                                                        |            |            |            |             |            |            |            |                                                                                                                                                                                                                                                                                                                                                                                                                                                                                                                                                                                                                                                                                                                                                                                                                                                                                                                                                                                                                                                                                                                                                                                                                                                                                                                                                                                                                                                                                                                                                                                                                                                                                                                                                                                                                                                                                                                                                                                                                                                                                                                                                                                                                                                                                                                                                                                                                                                                                                                                                                                             |   |            |             |             |   |            |             |             |   |            |             |             |   |            |             |             |   |            |             |             |   |            |             |             |   |            |             |            |   |            |             |            |   |            |            |             |   |            |             |             |   |            |             |             |   |             |             |             |   |             |             |             |   |             |            |             |   |             |             |             |   |             |             |             |   |             |            |             |   |             |             |             |   |             |             |             |   |             |             |             |   |             |             |             |   |             |             |             |   |             |             |             |   |             |            |             |   |             |             |             |   |             |             |            |   |             |             |             |   |             |            |             |   |            |            |            |   |            |            |            |   |            |            |            |
| O                                                                                                                                                                                                                                                                                                                                                                                                                                                                                                                                                                                                                                                                                                                                                                                                                                                                                                                                                                                                                                                                                                                                                                                                                                                                                                                                                                                                                                                                                                                                                                                                                                                                                                                                                                                                                                                                                                                                                                                                                                                                                                                                                                                                                                                                                                                                               | 2.17084300  | 2.87246400                                                                         | -0.56652000                                                                          |             |   |            |            |             |   |            |             |             |   |            |             |             |   |            |             |             |   |            |             |             |   |            |            |             |   |            |             |             |   |            |             |            |   |            |             |             |   |            |            |             |   |            |             |             |   |            |             |             |   |             |             |             |   |             |             |             |   |             |             |            |   |             |             |             |   |             |             |             |   |             |             |             |   |             |             |             |   |             |             |            |   |             |             |             |   |             |            |             |   |             |             |             |   |             |            |             |   |             |            |             |   |             |             |             |                                                                                                                                                                                                                                                                                                                                                                                                                                                                                                                                                                                                                                                                                                                                                                                                                                                                                                                                                                                                                                                                                                                                                                                                                                                                                                                                                                                                                                                                                                                                                                                                                                                                                                                                                                                                                                                                                                                                                                                                                                                                                                                                                                                                                                                                                                                                                                                                                                                                                                                     |            |             |            |                                                                                                                                                                                                                                                                                                                                                                                                                                                                                                                                                                                                                                                                                                                                                                                                                                                                                                                                                                                                                                                                                                                                                                                                                                                                                                                                                                                                                                                                                                                                                                                                                                                                                                                                                                                                                                                                                                                                                                                                                                                                                                                                                                                                                                                                                                                                                                                                                                                                                                                                                                                               |   |            |             |             |   |            |             |             |   |            |             |             |   |            |             |             |   |            |             |             |   |            |             |             |   |            |             |            |   |            |             |            |   |            |             |             |   |            |             |             |   |            |             |             |   |             |             |             |   |             |             |             |   |             |             |             |   |             |            |             |   |             |             |             |   |             |             |             |   |             |             |             |   |             |            |             |   |             |             |             |   |             |             |             |   |             |             |             |   |             |             |             |   |             |            |             |   |             |             |             |   |             |             |            |   |             |            |             |   |             |             |             |   |             |            |            |                                                                                                                                                                                                                                                                                                                                                                                                                                                                                                                                                                                                                                                                                                                                                                                                                                                                                                                                                                                                                                                                                                                                                                                                                                                                                                                                                                                                                                                                                                                                                                                                                                                                                                                                                                                                                                                                                                                                                                                                                                                                                                                                                                                                                                                                                                                                                                                                                                                                                                                        |            |            |            |             |            |            |            |                                                                                                                                                                                                                                                                                                                                                                                                                                                                                                                                                                                                                                                                                                                                                                                                                                                                                                                                                                                                                                                                                                                                                                                                                                                                                                                                                                                                                                                                                                                                                                                                                                                                                                                                                                                                                                                                                                                                                                                                                                                                                                                                                                                                                                                                                                                                                                                                                                                                                                                                                                                             |   |            |             |             |   |            |             |             |   |            |             |             |   |            |             |             |   |            |             |             |   |            |             |             |   |            |             |            |   |            |             |            |   |            |            |             |   |            |             |             |   |            |             |             |   |             |             |             |   |             |             |             |   |             |            |             |   |             |             |             |   |             |             |             |   |             |            |             |   |             |             |             |   |             |             |             |   |             |             |             |   |             |             |             |   |             |             |             |   |             |             |             |   |             |            |             |   |             |             |             |   |             |             |            |   |             |             |             |   |             |            |             |   |            |            |            |   |            |            |            |   |            |            |            |
| O                                                                                                                                                                                                                                                                                                                                                                                                                                                                                                                                                                                                                                                                                                                                                                                                                                                                                                                                                                                                                                                                                                                                                                                                                                                                                                                                                                                                                                                                                                                                                                                                                                                                                                                                                                                                                                                                                                                                                                                                                                                                                                                                                                                                                                                                                                                                               | 0.35992000  | -0.85985000                                                                        | -0.66203900                                                                          |             |   |            |            |             |   |            |             |             |   |            |             |             |   |            |             |             |   |            |             |             |   |            |            |             |   |            |             |             |   |            |             |            |   |            |             |             |   |            |            |             |   |            |             |             |   |            |             |             |   |             |             |             |   |             |             |             |   |             |             |            |   |             |             |             |   |             |             |             |   |             |             |             |   |             |             |             |   |             |             |            |   |             |             |             |   |             |            |             |   |             |             |             |   |             |            |             |   |             |            |             |   |             |             |             |                                                                                                                                                                                                                                                                                                                                                                                                                                                                                                                                                                                                                                                                                                                                                                                                                                                                                                                                                                                                                                                                                                                                                                                                                                                                                                                                                                                                                                                                                                                                                                                                                                                                                                                                                                                                                                                                                                                                                                                                                                                                                                                                                                                                                                                                                                                                                                                                                                                                                                                     |            |             |            |                                                                                                                                                                                                                                                                                                                                                                                                                                                                                                                                                                                                                                                                                                                                                                                                                                                                                                                                                                                                                                                                                                                                                                                                                                                                                                                                                                                                                                                                                                                                                                                                                                                                                                                                                                                                                                                                                                                                                                                                                                                                                                                                                                                                                                                                                                                                                                                                                                                                                                                                                                                               |   |            |             |             |   |            |             |             |   |            |             |             |   |            |             |             |   |            |             |             |   |            |             |             |   |            |             |            |   |            |             |            |   |            |             |             |   |            |             |             |   |            |             |             |   |             |             |             |   |             |             |             |   |             |             |             |   |             |            |             |   |             |             |             |   |             |             |             |   |             |             |             |   |             |            |             |   |             |             |             |   |             |             |             |   |             |             |             |   |             |             |             |   |             |            |             |   |             |             |             |   |             |             |            |   |             |            |             |   |             |             |             |   |             |            |            |                                                                                                                                                                                                                                                                                                                                                                                                                                                                                                                                                                                                                                                                                                                                                                                                                                                                                                                                                                                                                                                                                                                                                                                                                                                                                                                                                                                                                                                                                                                                                                                                                                                                                                                                                                                                                                                                                                                                                                                                                                                                                                                                                                                                                                                                                                                                                                                                                                                                                                                        |            |            |            |             |            |            |            |                                                                                                                                                                                                                                                                                                                                                                                                                                                                                                                                                                                                                                                                                                                                                                                                                                                                                                                                                                                                                                                                                                                                                                                                                                                                                                                                                                                                                                                                                                                                                                                                                                                                                                                                                                                                                                                                                                                                                                                                                                                                                                                                                                                                                                                                                                                                                                                                                                                                                                                                                                                             |   |            |             |             |   |            |             |             |   |            |             |             |   |            |             |             |   |            |             |             |   |            |             |             |   |            |             |            |   |            |             |            |   |            |            |             |   |            |             |             |   |            |             |             |   |             |             |             |   |             |             |             |   |             |            |             |   |             |             |             |   |             |             |             |   |             |            |             |   |             |             |             |   |             |             |             |   |             |             |             |   |             |             |             |   |             |             |             |   |             |             |             |   |             |            |             |   |             |             |             |   |             |             |            |   |             |             |             |   |             |            |             |   |            |            |            |   |            |            |            |   |            |            |            |
| C                                                                                                                                                                                                                                                                                                                                                                                                                                                                                                                                                                                                                                                                                                                                                                                                                                                                                                                                                                                                                                                                                                                                                                                                                                                                                                                                                                                                                                                                                                                                                                                                                                                                                                                                                                                                                                                                                                                                                                                                                                                                                                                                                                                                                                                                                                                                               | -1.82556700 | 0.00326400                                                                         | -0.51778400                                                                          |             |   |            |            |             |   |            |             |             |   |            |             |             |   |            |             |             |   |            |             |             |   |            |            |             |   |            |             |             |   |            |             |            |   |            |             |             |   |            |            |             |   |            |             |             |   |            |             |             |   |             |             |             |   |             |             |             |   |             |             |            |   |             |             |             |   |             |             |             |   |             |             |             |   |             |             |             |   |             |             |            |   |             |             |             |   |             |            |             |   |             |             |             |   |             |            |             |   |             |            |             |   |             |             |             |                                                                                                                                                                                                                                                                                                                                                                                                                                                                                                                                                                                                                                                                                                                                                                                                                                                                                                                                                                                                                                                                                                                                                                                                                                                                                                                                                                                                                                                                                                                                                                                                                                                                                                                                                                                                                                                                                                                                                                                                                                                                                                                                                                                                                                                                                                                                                                                                                                                                                                                     |            |             |            |                                                                                                                                                                                                                                                                                                                                                                                                                                                                                                                                                                                                                                                                                                                                                                                                                                                                                                                                                                                                                                                                                                                                                                                                                                                                                                                                                                                                                                                                                                                                                                                                                                                                                                                                                                                                                                                                                                                                                                                                                                                                                                                                                                                                                                                                                                                                                                                                                                                                                                                                                                                               |   |            |             |             |   |            |             |             |   |            |             |             |   |            |             |             |   |            |             |             |   |            |             |             |   |            |             |            |   |            |             |            |   |            |             |             |   |            |             |             |   |            |             |             |   |             |             |             |   |             |             |             |   |             |             |             |   |             |            |             |   |             |             |             |   |             |             |             |   |             |             |             |   |             |            |             |   |             |             |             |   |             |             |             |   |             |             |             |   |             |             |             |   |             |            |             |   |             |             |             |   |             |             |            |   |             |            |             |   |             |             |             |   |             |            |            |                                                                                                                                                                                                                                                                                                                                                                                                                                                                                                                                                                                                                                                                                                                                                                                                                                                                                                                                                                                                                                                                                                                                                                                                                                                                                                                                                                                                                                                                                                                                                                                                                                                                                                                                                                                                                                                                                                                                                                                                                                                                                                                                                                                                                                                                                                                                                                                                                                                                                                                        |            |            |            |             |            |            |            |                                                                                                                                                                                                                                                                                                                                                                                                                                                                                                                                                                                                                                                                                                                                                                                                                                                                                                                                                                                                                                                                                                                                                                                                                                                                                                                                                                                                                                                                                                                                                                                                                                                                                                                                                                                                                                                                                                                                                                                                                                                                                                                                                                                                                                                                                                                                                                                                                                                                                                                                                                                             |   |            |             |             |   |            |             |             |   |            |             |             |   |            |             |             |   |            |             |             |   |            |             |             |   |            |             |            |   |            |             |            |   |            |            |             |   |            |             |             |   |            |             |             |   |             |             |             |   |             |             |             |   |             |            |             |   |             |             |             |   |             |             |             |   |             |            |             |   |             |             |             |   |             |             |             |   |             |             |             |   |             |             |             |   |             |             |             |   |             |             |             |   |             |            |             |   |             |             |             |   |             |             |            |   |             |             |             |   |             |            |             |   |            |            |            |   |            |            |            |   |            |            |            |
| C                                                                                                                                                                                                                                                                                                                                                                                                                                                                                                                                                                                                                                                                                                                                                                                                                                                                                                                                                                                                                                                                                                                                                                                                                                                                                                                                                                                                                                                                                                                                                                                                                                                                                                                                                                                                                                                                                                                                                                                                                                                                                                                                                                                                                                                                                                                                               | -2.36023500 | -1.33982000                                                                        | -0.62213100                                                                          |             |   |            |            |             |   |            |             |             |   |            |             |             |   |            |             |             |   |            |             |             |   |            |            |             |   |            |             |             |   |            |             |            |   |            |             |             |   |            |            |             |   |            |             |             |   |            |             |             |   |             |             |             |   |             |             |             |   |             |             |            |   |             |             |             |   |             |             |             |   |             |             |             |   |             |             |             |   |             |             |            |   |             |             |             |   |             |            |             |   |             |             |             |   |             |            |             |   |             |            |             |   |             |             |             |                                                                                                                                                                                                                                                                                                                                                                                                                                                                                                                                                                                                                                                                                                                                                                                                                                                                                                                                                                                                                                                                                                                                                                                                                                                                                                                                                                                                                                                                                                                                                                                                                                                                                                                                                                                                                                                                                                                                                                                                                                                                                                                                                                                                                                                                                                                                                                                                                                                                                                                     |            |             |            |                                                                                                                                                                                                                                                                                                                                                                                                                                                                                                                                                                                                                                                                                                                                                                                                                                                                                                                                                                                                                                                                                                                                                                                                                                                                                                                                                                                                                                                                                                                                                                                                                                                                                                                                                                                                                                                                                                                                                                                                                                                                                                                                                                                                                                                                                                                                                                                                                                                                                                                                                                                               |   |            |             |             |   |            |             |             |   |            |             |             |   |            |             |             |   |            |             |             |   |            |             |             |   |            |             |            |   |            |             |            |   |            |             |             |   |            |             |             |   |            |             |             |   |             |             |             |   |             |             |             |   |             |             |             |   |             |            |             |   |             |             |             |   |             |             |             |   |             |             |             |   |             |            |             |   |             |             |             |   |             |             |             |   |             |             |             |   |             |             |             |   |             |            |             |   |             |             |             |   |             |             |            |   |             |            |             |   |             |             |             |   |             |            |            |                                                                                                                                                                                                                                                                                                                                                                                                                                                                                                                                                                                                                                                                                                                                                                                                                                                                                                                                                                                                                                                                                                                                                                                                                                                                                                                                                                                                                                                                                                                                                                                                                                                                                                                                                                                                                                                                                                                                                                                                                                                                                                                                                                                                                                                                                                                                                                                                                                                                                                                        |            |            |            |             |            |            |            |                                                                                                                                                                                                                                                                                                                                                                                                                                                                                                                                                                                                                                                                                                                                                                                                                                                                                                                                                                                                                                                                                                                                                                                                                                                                                                                                                                                                                                                                                                                                                                                                                                                                                                                                                                                                                                                                                                                                                                                                                                                                                                                                                                                                                                                                                                                                                                                                                                                                                                                                                                                             |   |            |             |             |   |            |             |             |   |            |             |             |   |            |             |             |   |            |             |             |   |            |             |             |   |            |             |            |   |            |             |            |   |            |            |             |   |            |             |             |   |            |             |             |   |             |             |             |   |             |             |             |   |             |            |             |   |             |             |             |   |             |             |             |   |             |            |             |   |             |             |             |   |             |             |             |   |             |             |             |   |             |             |             |   |             |             |             |   |             |             |             |   |             |            |             |   |             |             |             |   |             |             |            |   |             |             |             |   |             |            |             |   |            |            |            |   |            |            |            |   |            |            |            |
| C                                                                                                                                                                                                                                                                                                                                                                                                                                                                                                                                                                                                                                                                                                                                                                                                                                                                                                                                                                                                                                                                                                                                                                                                                                                                                                                                                                                                                                                                                                                                                                                                                                                                                                                                                                                                                                                                                                                                                                                                                                                                                                                                                                                                                                                                                                                                               | -2.83318500 | 1.04461100                                                                         | -0.47841000                                                                          |             |   |            |            |             |   |            |             |             |   |            |             |             |   |            |             |             |   |            |             |             |   |            |            |             |   |            |             |             |   |            |             |            |   |            |             |             |   |            |            |             |   |            |             |             |   |            |             |             |   |             |             |             |   |             |             |             |   |             |             |            |   |             |             |             |   |             |             |             |   |             |             |             |   |             |             |             |   |             |             |            |   |             |             |             |   |             |            |             |   |             |             |             |   |             |            |             |   |             |            |             |   |             |             |             |                                                                                                                                                                                                                                                                                                                                                                                                                                                                                                                                                                                                                                                                                                                                                                                                                                                                                                                                                                                                                                                                                                                                                                                                                                                                                                                                                                                                                                                                                                                                                                                                                                                                                                                                                                                                                                                                                                                                                                                                                                                                                                                                                                                                                                                                                                                                                                                                                                                                                                                     |            |             |            |                                                                                                                                                                                                                                                                                                                                                                                                                                                                                                                                                                                                                                                                                                                                                                                                                                                                                                                                                                                                                                                                                                                                                                                                                                                                                                                                                                                                                                                                                                                                                                                                                                                                                                                                                                                                                                                                                                                                                                                                                                                                                                                                                                                                                                                                                                                                                                                                                                                                                                                                                                                               |   |            |             |             |   |            |             |             |   |            |             |             |   |            |             |             |   |            |             |             |   |            |             |             |   |            |             |            |   |            |             |            |   |            |             |             |   |            |             |             |   |            |             |             |   |             |             |             |   |             |             |             |   |             |             |             |   |             |            |             |   |             |             |             |   |             |             |             |   |             |             |             |   |             |            |             |   |             |             |             |   |             |             |             |   |             |             |             |   |             |             |             |   |             |            |             |   |             |             |             |   |             |             |            |   |             |            |             |   |             |             |             |   |             |            |            |                                                                                                                                                                                                                                                                                                                                                                                                                                                                                                                                                                                                                                                                                                                                                                                                                                                                                                                                                                                                                                                                                                                                                                                                                                                                                                                                                                                                                                                                                                                                                                                                                                                                                                                                                                                                                                                                                                                                                                                                                                                                                                                                                                                                                                                                                                                                                                                                                                                                                                                        |            |            |            |             |            |            |            |                                                                                                                                                                                                                                                                                                                                                                                                                                                                                                                                                                                                                                                                                                                                                                                                                                                                                                                                                                                                                                                                                                                                                                                                                                                                                                                                                                                                                                                                                                                                                                                                                                                                                                                                                                                                                                                                                                                                                                                                                                                                                                                                                                                                                                                                                                                                                                                                                                                                                                                                                                                             |   |            |             |             |   |            |             |             |   |            |             |             |   |            |             |             |   |            |             |             |   |            |             |             |   |            |             |            |   |            |             |            |   |            |            |             |   |            |             |             |   |            |             |             |   |             |             |             |   |             |             |             |   |             |            |             |   |             |             |             |   |             |             |             |   |             |            |             |   |             |             |             |   |             |             |             |   |             |             |             |   |             |             |             |   |             |             |             |   |             |             |             |   |             |            |             |   |             |             |             |   |             |             |            |   |             |             |             |   |             |            |             |   |            |            |            |   |            |            |            |   |            |            |            |
| C                                                                                                                                                                                                                                                                                                                                                                                                                                                                                                                                                                                                                                                                                                                                                                                                                                                                                                                                                                                                                                                                                                                                                                                                                                                                                                                                                                                                                                                                                                                                                                                                                                                                                                                                                                                                                                                                                                                                                                                                                                                                                                                                                                                                                                                                                                                                               | -3.71351400 | -1.58659900                                                                        | -0.60924900                                                                          |             |   |            |            |             |   |            |             |             |   |            |             |             |   |            |             |             |   |            |             |             |   |            |            |             |   |            |             |             |   |            |             |            |   |            |             |             |   |            |            |             |   |            |             |             |   |            |             |             |   |             |             |             |   |             |             |             |   |             |             |            |   |             |             |             |   |             |             |             |   |             |             |             |   |             |             |             |   |             |             |            |   |             |             |             |   |             |            |             |   |             |             |             |   |             |            |             |   |             |            |             |   |             |             |             |                                                                                                                                                                                                                                                                                                                                                                                                                                                                                                                                                                                                                                                                                                                                                                                                                                                                                                                                                                                                                                                                                                                                                                                                                                                                                                                                                                                                                                                                                                                                                                                                                                                                                                                                                                                                                                                                                                                                                                                                                                                                                                                                                                                                                                                                                                                                                                                                                                                                                                                     |            |             |            |                                                                                                                                                                                                                                                                                                                                                                                                                                                                                                                                                                                                                                                                                                                                                                                                                                                                                                                                                                                                                                                                                                                                                                                                                                                                                                                                                                                                                                                                                                                                                                                                                                                                                                                                                                                                                                                                                                                                                                                                                                                                                                                                                                                                                                                                                                                                                                                                                                                                                                                                                                                               |   |            |             |             |   |            |             |             |   |            |             |             |   |            |             |             |   |            |             |             |   |            |             |             |   |            |             |            |   |            |             |            |   |            |             |             |   |            |             |             |   |            |             |             |   |             |             |             |   |             |             |             |   |             |             |             |   |             |            |             |   |             |             |             |   |             |             |             |   |             |             |             |   |             |            |             |   |             |             |             |   |             |             |             |   |             |             |             |   |             |             |             |   |             |            |             |   |             |             |             |   |             |             |            |   |             |            |             |   |             |             |             |   |             |            |            |                                                                                                                                                                                                                                                                                                                                                                                                                                                                                                                                                                                                                                                                                                                                                                                                                                                                                                                                                                                                                                                                                                                                                                                                                                                                                                                                                                                                                                                                                                                                                                                                                                                                                                                                                                                                                                                                                                                                                                                                                                                                                                                                                                                                                                                                                                                                                                                                                                                                                                                        |            |            |            |             |            |            |            |                                                                                                                                                                                                                                                                                                                                                                                                                                                                                                                                                                                                                                                                                                                                                                                                                                                                                                                                                                                                                                                                                                                                                                                                                                                                                                                                                                                                                                                                                                                                                                                                                                                                                                                                                                                                                                                                                                                                                                                                                                                                                                                                                                                                                                                                                                                                                                                                                                                                                                                                                                                             |   |            |             |             |   |            |             |             |   |            |             |             |   |            |             |             |   |            |             |             |   |            |             |             |   |            |             |            |   |            |             |            |   |            |            |             |   |            |             |             |   |            |             |             |   |             |             |             |   |             |             |             |   |             |            |             |   |             |             |             |   |             |             |             |   |             |            |             |   |             |             |             |   |             |             |             |   |             |             |             |   |             |             |             |   |             |             |             |   |             |             |             |   |             |            |             |   |             |             |             |   |             |             |            |   |             |             |             |   |             |            |             |   |            |            |            |   |            |            |            |   |            |            |            |
| H                                                                                                                                                                                                                                                                                                                                                                                                                                                                                                                                                                                                                                                                                                                                                                                                                                                                                                                                                                                                                                                                                                                                                                                                                                                                                                                                                                                                                                                                                                                                                                                                                                                                                                                                                                                                                                                                                                                                                                                                                                                                                                                                                                                                                                                                                                                                               | -1.67157500 | -2.17154900                                                                        | -0.69342500                                                                          |             |   |            |            |             |   |            |             |             |   |            |             |             |   |            |             |             |   |            |             |             |   |            |            |             |   |            |             |             |   |            |             |            |   |            |             |             |   |            |            |             |   |            |             |             |   |            |             |             |   |             |             |             |   |             |             |             |   |             |             |            |   |             |             |             |   |             |             |             |   |             |             |             |   |             |             |             |   |             |             |            |   |             |             |             |   |             |            |             |   |             |             |             |   |             |            |             |   |             |            |             |   |             |             |             |                                                                                                                                                                                                                                                                                                                                                                                                                                                                                                                                                                                                                                                                                                                                                                                                                                                                                                                                                                                                                                                                                                                                                                                                                                                                                                                                                                                                                                                                                                                                                                                                                                                                                                                                                                                                                                                                                                                                                                                                                                                                                                                                                                                                                                                                                                                                                                                                                                                                                                                     |            |             |            |                                                                                                                                                                                                                                                                                                                                                                                                                                                                                                                                                                                                                                                                                                                                                                                                                                                                                                                                                                                                                                                                                                                                                                                                                                                                                                                                                                                                                                                                                                                                                                                                                                                                                                                                                                                                                                                                                                                                                                                                                                                                                                                                                                                                                                                                                                                                                                                                                                                                                                                                                                                               |   |            |             |             |   |            |             |             |   |            |             |             |   |            |             |             |   |            |             |             |   |            |             |             |   |            |             |            |   |            |             |            |   |            |             |             |   |            |             |             |   |            |             |             |   |             |             |             |   |             |             |             |   |             |             |             |   |             |            |             |   |             |             |             |   |             |             |             |   |             |             |             |   |             |            |             |   |             |             |             |   |             |             |             |   |             |             |             |   |             |             |             |   |             |            |             |   |             |             |             |   |             |             |            |   |             |            |             |   |             |             |             |   |             |            |            |                                                                                                                                                                                                                                                                                                                                                                                                                                                                                                                                                                                                                                                                                                                                                                                                                                                                                                                                                                                                                                                                                                                                                                                                                                                                                                                                                                                                                                                                                                                                                                                                                                                                                                                                                                                                                                                                                                                                                                                                                                                                                                                                                                                                                                                                                                                                                                                                                                                                                                                        |            |            |            |             |            |            |            |                                                                                                                                                                                                                                                                                                                                                                                                                                                                                                                                                                                                                                                                                                                                                                                                                                                                                                                                                                                                                                                                                                                                                                                                                                                                                                                                                                                                                                                                                                                                                                                                                                                                                                                                                                                                                                                                                                                                                                                                                                                                                                                                                                                                                                                                                                                                                                                                                                                                                                                                                                                             |   |            |             |             |   |            |             |             |   |            |             |             |   |            |             |             |   |            |             |             |   |            |             |             |   |            |             |            |   |            |             |            |   |            |            |             |   |            |             |             |   |            |             |             |   |             |             |             |   |             |             |             |   |             |            |             |   |             |             |             |   |             |             |             |   |             |            |             |   |             |             |             |   |             |             |             |   |             |             |             |   |             |             |             |   |             |             |             |   |             |             |             |   |             |            |             |   |             |             |             |   |             |             |            |   |             |             |             |   |             |            |             |   |            |            |            |   |            |            |            |   |            |            |            |
| C                                                                                                                                                                                                                                                                                                                                                                                                                                                                                                                                                                                                                                                                                                                                                                                                                                                                                                                                                                                                                                                                                                                                                                                                                                                                                                                                                                                                                                                                                                                                                                                                                                                                                                                                                                                                                                                                                                                                                                                                                                                                                                                                                                                                                                                                                                                                               | -4.17625100 | 0.75541000                                                                         | -0.46874300                                                                          |             |   |            |            |             |   |            |             |             |   |            |             |             |   |            |             |             |   |            |             |             |   |            |            |             |   |            |             |             |   |            |             |            |   |            |             |             |   |            |            |             |   |            |             |             |   |            |             |             |   |             |             |             |   |             |             |             |   |             |             |            |   |             |             |             |   |             |             |             |   |             |             |             |   |             |             |             |   |             |             |            |   |             |             |             |   |             |            |             |   |             |             |             |   |             |            |             |   |             |            |             |   |             |             |             |                                                                                                                                                                                                                                                                                                                                                                                                                                                                                                                                                                                                                                                                                                                                                                                                                                                                                                                                                                                                                                                                                                                                                                                                                                                                                                                                                                                                                                                                                                                                                                                                                                                                                                                                                                                                                                                                                                                                                                                                                                                                                                                                                                                                                                                                                                                                                                                                                                                                                                                     |            |             |            |                                                                                                                                                                                                                                                                                                                                                                                                                                                                                                                                                                                                                                                                                                                                                                                                                                                                                                                                                                                                                                                                                                                                                                                                                                                                                                                                                                                                                                                                                                                                                                                                                                                                                                                                                                                                                                                                                                                                                                                                                                                                                                                                                                                                                                                                                                                                                                                                                                                                                                                                                                                               |   |            |             |             |   |            |             |             |   |            |             |             |   |            |             |             |   |            |             |             |   |            |             |             |   |            |             |            |   |            |             |            |   |            |             |             |   |            |             |             |   |            |             |             |   |             |             |             |   |             |             |             |   |             |             |             |   |             |            |             |   |             |             |             |   |             |             |             |   |             |             |             |   |             |            |             |   |             |             |             |   |             |             |             |   |             |             |             |   |             |             |             |   |             |            |             |   |             |             |             |   |             |             |            |   |             |            |             |   |             |             |             |   |             |            |            |                                                                                                                                                                                                                                                                                                                                                                                                                                                                                                                                                                                                                                                                                                                                                                                                                                                                                                                                                                                                                                                                                                                                                                                                                                                                                                                                                                                                                                                                                                                                                                                                                                                                                                                                                                                                                                                                                                                                                                                                                                                                                                                                                                                                                                                                                                                                                                                                                                                                                                                        |            |            |            |             |            |            |            |                                                                                                                                                                                                                                                                                                                                                                                                                                                                                                                                                                                                                                                                                                                                                                                                                                                                                                                                                                                                                                                                                                                                                                                                                                                                                                                                                                                                                                                                                                                                                                                                                                                                                                                                                                                                                                                                                                                                                                                                                                                                                                                                                                                                                                                                                                                                                                                                                                                                                                                                                                                             |   |            |             |             |   |            |             |             |   |            |             |             |   |            |             |             |   |            |             |             |   |            |             |             |   |            |             |            |   |            |             |            |   |            |            |             |   |            |             |             |   |            |             |             |   |             |             |             |   |             |             |             |   |             |            |             |   |             |             |             |   |             |             |             |   |             |            |             |   |             |             |             |   |             |             |             |   |             |             |             |   |             |             |             |   |             |             |             |   |             |             |             |   |             |            |             |   |             |             |             |   |             |             |            |   |             |             |             |   |             |            |             |   |            |            |            |   |            |            |            |   |            |            |            |
| H                                                                                                                                                                                                                                                                                                                                                                                                                                                                                                                                                                                                                                                                                                                                                                                                                                                                                                                                                                                                                                                                                                                                                                                                                                                                                                                                                                                                                                                                                                                                                                                                                                                                                                                                                                                                                                                                                                                                                                                                                                                                                                                                                                                                                                                                                                                                               | -2.52336100 | 2.08128200                                                                         | -0.42795700                                                                          |             |   |            |            |             |   |            |             |             |   |            |             |             |   |            |             |             |   |            |             |             |   |            |            |             |   |            |             |             |   |            |             |            |   |            |             |             |   |            |            |             |   |            |             |             |   |            |             |             |   |             |             |             |   |             |             |             |   |             |             |            |   |             |             |             |   |             |             |             |   |             |             |             |   |             |             |             |   |             |             |            |   |             |             |             |   |             |            |             |   |             |             |             |   |             |            |             |   |             |            |             |   |             |             |             |                                                                                                                                                                                                                                                                                                                                                                                                                                                                                                                                                                                                                                                                                                                                                                                                                                                                                                                                                                                                                                                                                                                                                                                                                                                                                                                                                                                                                                                                                                                                                                                                                                                                                                                                                                                                                                                                                                                                                                                                                                                                                                                                                                                                                                                                                                                                                                                                                                                                                                                     |            |             |            |                                                                                                                                                                                                                                                                                                                                                                                                                                                                                                                                                                                                                                                                                                                                                                                                                                                                                                                                                                                                                                                                                                                                                                                                                                                                                                                                                                                                                                                                                                                                                                                                                                                                                                                                                                                                                                                                                                                                                                                                                                                                                                                                                                                                                                                                                                                                                                                                                                                                                                                                                                                               |   |            |             |             |   |            |             |             |   |            |             |             |   |            |             |             |   |            |             |             |   |            |             |             |   |            |             |            |   |            |             |            |   |            |             |             |   |            |             |             |   |            |             |             |   |             |             |             |   |             |             |             |   |             |             |             |   |             |            |             |   |             |             |             |   |             |             |             |   |             |             |             |   |             |            |             |   |             |             |             |   |             |             |             |   |             |             |             |   |             |             |             |   |             |            |             |   |             |             |             |   |             |             |            |   |             |            |             |   |             |             |             |   |             |            |            |                                                                                                                                                                                                                                                                                                                                                                                                                                                                                                                                                                                                                                                                                                                                                                                                                                                                                                                                                                                                                                                                                                                                                                                                                                                                                                                                                                                                                                                                                                                                                                                                                                                                                                                                                                                                                                                                                                                                                                                                                                                                                                                                                                                                                                                                                                                                                                                                                                                                                                                        |            |            |            |             |            |            |            |                                                                                                                                                                                                                                                                                                                                                                                                                                                                                                                                                                                                                                                                                                                                                                                                                                                                                                                                                                                                                                                                                                                                                                                                                                                                                                                                                                                                                                                                                                                                                                                                                                                                                                                                                                                                                                                                                                                                                                                                                                                                                                                                                                                                                                                                                                                                                                                                                                                                                                                                                                                             |   |            |             |             |   |            |             |             |   |            |             |             |   |            |             |             |   |            |             |             |   |            |             |             |   |            |             |            |   |            |             |            |   |            |            |             |   |            |             |             |   |            |             |             |   |             |             |             |   |             |             |             |   |             |            |             |   |             |             |             |   |             |             |             |   |             |            |             |   |             |             |             |   |             |             |             |   |             |             |             |   |             |             |             |   |             |             |             |   |             |             |             |   |             |            |             |   |             |             |             |   |             |             |            |   |             |             |             |   |             |            |             |   |            |            |            |   |            |            |            |   |            |            |            |
| C                                                                                                                                                                                                                                                                                                                                                                                                                                                                                                                                                                                                                                                                                                                                                                                                                                                                                                                                                                                                                                                                                                                                                                                                                                                                                                                                                                                                                                                                                                                                                                                                                                                                                                                                                                                                                                                                                                                                                                                                                                                                                                                                                                                                                                                                                                                                               | -4.66576600 | -0.55953600                                                                        | -0.52028100                                                                          |             |   |            |            |             |   |            |             |             |   |            |             |             |   |            |             |             |   |            |             |             |   |            |            |             |   |            |             |             |   |            |             |            |   |            |             |             |   |            |            |             |   |            |             |             |   |            |             |             |   |             |             |             |   |             |             |             |   |             |             |            |   |             |             |             |   |             |             |             |   |             |             |             |   |             |             |             |   |             |             |            |   |             |             |             |   |             |            |             |   |             |             |             |   |             |            |             |   |             |            |             |   |             |             |             |                                                                                                                                                                                                                                                                                                                                                                                                                                                                                                                                                                                                                                                                                                                                                                                                                                                                                                                                                                                                                                                                                                                                                                                                                                                                                                                                                                                                                                                                                                                                                                                                                                                                                                                                                                                                                                                                                                                                                                                                                                                                                                                                                                                                                                                                                                                                                                                                                                                                                                                     |            |             |            |                                                                                                                                                                                                                                                                                                                                                                                                                                                                                                                                                                                                                                                                                                                                                                                                                                                                                                                                                                                                                                                                                                                                                                                                                                                                                                                                                                                                                                                                                                                                                                                                                                                                                                                                                                                                                                                                                                                                                                                                                                                                                                                                                                                                                                                                                                                                                                                                                                                                                                                                                                                               |   |            |             |             |   |            |             |             |   |            |             |             |   |            |             |             |   |            |             |             |   |            |             |             |   |            |             |            |   |            |             |            |   |            |             |             |   |            |             |             |   |            |             |             |   |             |             |             |   |             |             |             |   |             |             |             |   |             |            |             |   |             |             |             |   |             |             |             |   |             |             |             |   |             |            |             |   |             |             |             |   |             |             |             |   |             |             |             |   |             |             |             |   |             |            |             |   |             |             |             |   |             |             |            |   |             |            |             |   |             |             |             |   |             |            |            |                                                                                                                                                                                                                                                                                                                                                                                                                                                                                                                                                                                                                                                                                                                                                                                                                                                                                                                                                                                                                                                                                                                                                                                                                                                                                                                                                                                                                                                                                                                                                                                                                                                                                                                                                                                                                                                                                                                                                                                                                                                                                                                                                                                                                                                                                                                                                                                                                                                                                                                        |            |            |            |             |            |            |            |                                                                                                                                                                                                                                                                                                                                                                                                                                                                                                                                                                                                                                                                                                                                                                                                                                                                                                                                                                                                                                                                                                                                                                                                                                                                                                                                                                                                                                                                                                                                                                                                                                                                                                                                                                                                                                                                                                                                                                                                                                                                                                                                                                                                                                                                                                                                                                                                                                                                                                                                                                                             |   |            |             |             |   |            |             |             |   |            |             |             |   |            |             |             |   |            |             |             |   |            |             |             |   |            |             |            |   |            |             |            |   |            |            |             |   |            |             |             |   |            |             |             |   |             |             |             |   |             |             |             |   |             |            |             |   |             |             |             |   |             |             |             |   |             |            |             |   |             |             |             |   |             |             |             |   |             |             |             |   |             |             |             |   |             |             |             |   |             |             |             |   |             |            |             |   |             |             |             |   |             |             |            |   |             |             |             |   |             |            |             |   |            |            |            |   |            |            |            |   |            |            |            |
| H                                                                                                                                                                                                                                                                                                                                                                                                                                                                                                                                                                                                                                                                                                                                                                                                                                                                                                                                                                                                                                                                                                                                                                                                                                                                                                                                                                                                                                                                                                                                                                                                                                                                                                                                                                                                                                                                                                                                                                                                                                                                                                                                                                                                                                                                                                                                               | -4.04968300 | -2.61733600                                                                        | -0.67812000                                                                          |             |   |            |            |             |   |            |             |             |   |            |             |             |   |            |             |             |   |            |             |             |   |            |            |             |   |            |             |             |   |            |             |            |   |            |             |             |   |            |            |             |   |            |             |             |   |            |             |             |   |             |             |             |   |             |             |             |   |             |             |            |   |             |             |             |   |             |             |             |   |             |             |             |   |             |             |             |   |             |             |            |   |             |             |             |   |             |            |             |   |             |             |             |   |             |            |             |   |             |            |             |   |             |             |             |                                                                                                                                                                                                                                                                                                                                                                                                                                                                                                                                                                                                                                                                                                                                                                                                                                                                                                                                                                                                                                                                                                                                                                                                                                                                                                                                                                                                                                                                                                                                                                                                                                                                                                                                                                                                                                                                                                                                                                                                                                                                                                                                                                                                                                                                                                                                                                                                                                                                                                                     |            |             |            |                                                                                                                                                                                                                                                                                                                                                                                                                                                                                                                                                                                                                                                                                                                                                                                                                                                                                                                                                                                                                                                                                                                                                                                                                                                                                                                                                                                                                                                                                                                                                                                                                                                                                                                                                                                                                                                                                                                                                                                                                                                                                                                                                                                                                                                                                                                                                                                                                                                                                                                                                                                               |   |            |             |             |   |            |             |             |   |            |             |             |   |            |             |             |   |            |             |             |   |            |             |             |   |            |             |            |   |            |             |            |   |            |             |             |   |            |             |             |   |            |             |             |   |             |             |             |   |             |             |             |   |             |             |             |   |             |            |             |   |             |             |             |   |             |             |             |   |             |             |             |   |             |            |             |   |             |             |             |   |             |             |             |   |             |             |             |   |             |             |             |   |             |            |             |   |             |             |             |   |             |             |            |   |             |            |             |   |             |             |             |   |             |            |            |                                                                                                                                                                                                                                                                                                                                                                                                                                                                                                                                                                                                                                                                                                                                                                                                                                                                                                                                                                                                                                                                                                                                                                                                                                                                                                                                                                                                                                                                                                                                                                                                                                                                                                                                                                                                                                                                                                                                                                                                                                                                                                                                                                                                                                                                                                                                                                                                                                                                                                                        |            |            |            |             |            |            |            |                                                                                                                                                                                                                                                                                                                                                                                                                                                                                                                                                                                                                                                                                                                                                                                                                                                                                                                                                                                                                                                                                                                                                                                                                                                                                                                                                                                                                                                                                                                                                                                                                                                                                                                                                                                                                                                                                                                                                                                                                                                                                                                                                                                                                                                                                                                                                                                                                                                                                                                                                                                             |   |            |             |             |   |            |             |             |   |            |             |             |   |            |             |             |   |            |             |             |   |            |             |             |   |            |             |            |   |            |             |            |   |            |            |             |   |            |             |             |   |            |             |             |   |             |             |             |   |             |             |             |   |             |            |             |   |             |             |             |   |             |             |             |   |             |            |             |   |             |             |             |   |             |             |             |   |             |             |             |   |             |             |             |   |             |             |             |   |             |             |             |   |             |            |             |   |             |             |             |   |             |             |            |   |             |             |             |   |             |            |             |   |            |            |            |   |            |            |            |   |            |            |            |
| H                                                                                                                                                                                                                                                                                                                                                                                                                                                                                                                                                                                                                                                                                                                                                                                                                                                                                                                                                                                                                                                                                                                                                                                                                                                                                                                                                                                                                                                                                                                                                                                                                                                                                                                                                                                                                                                                                                                                                                                                                                                                                                                                                                                                                                                                                                                                               | -4.88004500 | 1.58281100                                                                         | -0.42502700                                                                          |             |   |            |            |             |   |            |             |             |   |            |             |             |   |            |             |             |   |            |             |             |   |            |            |             |   |            |             |             |   |            |             |            |   |            |             |             |   |            |            |             |   |            |             |             |   |            |             |             |   |             |             |             |   |             |             |             |   |             |             |            |   |             |             |             |   |             |             |             |   |             |             |             |   |             |             |             |   |             |             |            |   |             |             |             |   |             |            |             |   |             |             |             |   |             |            |             |   |             |            |             |   |             |             |             |                                                                                                                                                                                                                                                                                                                                                                                                                                                                                                                                                                                                                                                                                                                                                                                                                                                                                                                                                                                                                                                                                                                                                                                                                                                                                                                                                                                                                                                                                                                                                                                                                                                                                                                                                                                                                                                                                                                                                                                                                                                                                                                                                                                                                                                                                                                                                                                                                                                                                                                     |            |             |            |                                                                                                                                                                                                                                                                                                                                                                                                                                                                                                                                                                                                                                                                                                                                                                                                                                                                                                                                                                                                                                                                                                                                                                                                                                                                                                                                                                                                                                                                                                                                                                                                                                                                                                                                                                                                                                                                                                                                                                                                                                                                                                                                                                                                                                                                                                                                                                                                                                                                                                                                                                                               |   |            |             |             |   |            |             |             |   |            |             |             |   |            |             |             |   |            |             |             |   |            |             |             |   |            |             |            |   |            |             |            |   |            |             |             |   |            |             |             |   |            |             |             |   |             |             |             |   |             |             |             |   |             |             |             |   |             |            |             |   |             |             |             |   |             |             |             |   |             |             |             |   |             |            |             |   |             |             |             |   |             |             |             |   |             |             |             |   |             |             |             |   |             |            |             |   |             |             |             |   |             |             |            |   |             |            |             |   |             |             |             |   |             |            |            |                                                                                                                                                                                                                                                                                                                                                                                                                                                                                                                                                                                                                                                                                                                                                                                                                                                                                                                                                                                                                                                                                                                                                                                                                                                                                                                                                                                                                                                                                                                                                                                                                                                                                                                                                                                                                                                                                                                                                                                                                                                                                                                                                                                                                                                                                                                                                                                                                                                                                                                        |            |            |            |             |            |            |            |                                                                                                                                                                                                                                                                                                                                                                                                                                                                                                                                                                                                                                                                                                                                                                                                                                                                                                                                                                                                                                                                                                                                                                                                                                                                                                                                                                                                                                                                                                                                                                                                                                                                                                                                                                                                                                                                                                                                                                                                                                                                                                                                                                                                                                                                                                                                                                                                                                                                                                                                                                                             |   |            |             |             |   |            |             |             |   |            |             |             |   |            |             |             |   |            |             |             |   |            |             |             |   |            |             |            |   |            |             |            |   |            |            |             |   |            |             |             |   |            |             |             |   |             |             |             |   |             |             |             |   |             |            |             |   |             |             |             |   |             |             |             |   |             |            |             |   |             |             |             |   |             |             |             |   |             |             |             |   |             |             |             |   |             |             |             |   |             |             |             |   |             |            |             |   |             |             |             |   |             |             |            |   |             |             |             |   |             |            |             |   |            |            |            |   |            |            |            |   |            |            |            |
| H                                                                                                                                                                                                                                                                                                                                                                                                                                                                                                                                                                                                                                                                                                                                                                                                                                                                                                                                                                                                                                                                                                                                                                                                                                                                                                                                                                                                                                                                                                                                                                                                                                                                                                                                                                                                                                                                                                                                                                                                                                                                                                                                                                                                                                                                                                                                               | -5.72753800 | -0.76934100                                                                        | -0.51856600                                                                          |             |   |            |            |             |   |            |             |             |   |            |             |             |   |            |             |             |   |            |             |             |   |            |            |             |   |            |             |             |   |            |             |            |   |            |             |             |   |            |            |             |   |            |             |             |   |            |             |             |   |             |             |             |   |             |             |             |   |             |             |            |   |             |             |             |   |             |             |             |   |             |             |             |   |             |             |             |   |             |             |            |   |             |             |             |   |             |            |             |   |             |             |             |   |             |            |             |   |             |            |             |   |             |             |             |                                                                                                                                                                                                                                                                                                                                                                                                                                                                                                                                                                                                                                                                                                                                                                                                                                                                                                                                                                                                                                                                                                                                                                                                                                                                                                                                                                                                                                                                                                                                                                                                                                                                                                                                                                                                                                                                                                                                                                                                                                                                                                                                                                                                                                                                                                                                                                                                                                                                                                                     |            |             |            |                                                                                                                                                                                                                                                                                                                                                                                                                                                                                                                                                                                                                                                                                                                                                                                                                                                                                                                                                                                                                                                                                                                                                                                                                                                                                                                                                                                                                                                                                                                                                                                                                                                                                                                                                                                                                                                                                                                                                                                                                                                                                                                                                                                                                                                                                                                                                                                                                                                                                                                                                                                               |   |            |             |             |   |            |             |             |   |            |             |             |   |            |             |             |   |            |             |             |   |            |             |             |   |            |             |            |   |            |             |            |   |            |             |             |   |            |             |             |   |            |             |             |   |             |             |             |   |             |             |             |   |             |             |             |   |             |            |             |   |             |             |             |   |             |             |             |   |             |             |             |   |             |            |             |   |             |             |             |   |             |             |             |   |             |             |             |   |             |             |             |   |             |            |             |   |             |             |             |   |             |             |            |   |             |            |             |   |             |             |             |   |             |            |            |                                                                                                                                                                                                                                                                                                                                                                                                                                                                                                                                                                                                                                                                                                                                                                                                                                                                                                                                                                                                                                                                                                                                                                                                                                                                                                                                                                                                                                                                                                                                                                                                                                                                                                                                                                                                                                                                                                                                                                                                                                                                                                                                                                                                                                                                                                                                                                                                                                                                                                                        |            |            |            |             |            |            |            |                                                                                                                                                                                                                                                                                                                                                                                                                                                                                                                                                                                                                                                                                                                                                                                                                                                                                                                                                                                                                                                                                                                                                                                                                                                                                                                                                                                                                                                                                                                                                                                                                                                                                                                                                                                                                                                                                                                                                                                                                                                                                                                                                                                                                                                                                                                                                                                                                                                                                                                                                                                             |   |            |             |             |   |            |             |             |   |            |             |             |   |            |             |             |   |            |             |             |   |            |             |             |   |            |             |            |   |            |             |            |   |            |            |             |   |            |             |             |   |            |             |             |   |             |             |             |   |             |             |             |   |             |            |             |   |             |             |             |   |             |             |             |   |             |            |             |   |             |             |             |   |             |             |             |   |             |             |             |   |             |             |             |   |             |             |             |   |             |             |             |   |             |            |             |   |             |             |             |   |             |             |            |   |             |             |             |   |             |            |             |   |            |            |            |   |            |            |            |   |            |            |            |
| C                                                                                                                                                                                                                                                                                                                                                                                                                                                                                                                                                                                                                                                                                                                                                                                                                                                                                                                                                                                                                                                                                                                                                                                                                                                                                                                                                                                                                                                                                                                                                                                                                                                                                                                                                                                                                                                                                                                                                                                                                                                                                                                                                                                                                                                                                                                                               | 0.18199500  | 1.56189600                                                                         | -0.58117500                                                                          |             |   |            |            |             |   |            |             |             |   |            |             |             |   |            |             |             |   |            |             |             |   |            |            |             |   |            |             |             |   |            |             |            |   |            |             |             |   |            |            |             |   |            |             |             |   |            |             |             |   |             |             |             |   |             |             |             |   |             |             |            |   |             |             |             |   |             |             |             |   |             |             |             |   |             |             |             |   |             |             |            |   |             |             |             |   |             |            |             |   |             |             |             |   |             |            |             |   |             |            |             |   |             |             |             |                                                                                                                                                                                                                                                                                                                                                                                                                                                                                                                                                                                                                                                                                                                                                                                                                                                                                                                                                                                                                                                                                                                                                                                                                                                                                                                                                                                                                                                                                                                                                                                                                                                                                                                                                                                                                                                                                                                                                                                                                                                                                                                                                                                                                                                                                                                                                                                                                                                                                                                     |            |             |            |                                                                                                                                                                                                                                                                                                                                                                                                                                                                                                                                                                                                                                                                                                                                                                                                                                                                                                                                                                                                                                                                                                                                                                                                                                                                                                                                                                                                                                                                                                                                                                                                                                                                                                                                                                                                                                                                                                                                                                                                                                                                                                                                                                                                                                                                                                                                                                                                                                                                                                                                                                                               |   |            |             |             |   |            |             |             |   |            |             |             |   |            |             |             |   |            |             |             |   |            |             |             |   |            |             |            |   |            |             |            |   |            |             |             |   |            |             |             |   |            |             |             |   |             |             |             |   |             |             |             |   |             |             |             |   |             |            |             |   |             |             |             |   |             |             |             |   |             |             |             |   |             |            |             |   |             |             |             |   |             |             |             |   |             |             |             |   |             |             |             |   |             |            |             |   |             |             |             |   |             |             |            |   |             |            |             |   |             |             |             |   |             |            |            |                                                                                                                                                                                                                                                                                                                                                                                                                                                                                                                                                                                                                                                                                                                                                                                                                                                                                                                                                                                                                                                                                                                                                                                                                                                                                                                                                                                                                                                                                                                                                                                                                                                                                                                                                                                                                                                                                                                                                                                                                                                                                                                                                                                                                                                                                                                                                                                                                                                                                                                        |            |            |            |             |            |            |            |                                                                                                                                                                                                                                                                                                                                                                                                                                                                                                                                                                                                                                                                                                                                                                                                                                                                                                                                                                                                                                                                                                                                                                                                                                                                                                                                                                                                                                                                                                                                                                                                                                                                                                                                                                                                                                                                                                                                                                                                                                                                                                                                                                                                                                                                                                                                                                                                                                                                                                                                                                                             |   |            |             |             |   |            |             |             |   |            |             |             |   |            |             |             |   |            |             |             |   |            |             |             |   |            |             |            |   |            |             |            |   |            |            |             |   |            |             |             |   |            |             |             |   |             |             |             |   |             |             |             |   |             |            |             |   |             |             |             |   |             |             |             |   |             |            |             |   |             |             |             |   |             |             |             |   |             |             |             |   |             |             |             |   |             |             |             |   |             |             |             |   |             |            |             |   |             |             |             |   |             |             |            |   |             |             |             |   |             |            |             |   |            |            |            |   |            |            |            |   |            |            |            |
| H                                                                                                                                                                                                                                                                                                                                                                                                                                                                                                                                                                                                                                                                                                                                                                                                                                                                                                                                                                                                                                                                                                                                                                                                                                                                                                                                                                                                                                                                                                                                                                                                                                                                                                                                                                                                                                                                                                                                                                                                                                                                                                                                                                                                                                                                                                                                               | -0.45015600 | 2.43940300                                                                         | -0.65981500                                                                          |             |   |            |            |             |   |            |             |             |   |            |             |             |   |            |             |             |   |            |             |             |   |            |            |             |   |            |             |             |   |            |             |            |   |            |             |             |   |            |            |             |   |            |             |             |   |            |             |             |   |             |             |             |   |             |             |             |   |             |             |            |   |             |             |             |   |             |             |             |   |             |             |             |   |             |             |             |   |             |             |            |   |             |             |             |   |             |            |             |   |             |             |             |   |             |            |             |   |             |            |             |   |             |             |             |                                                                                                                                                                                                                                                                                                                                                                                                                                                                                                                                                                                                                                                                                                                                                                                                                                                                                                                                                                                                                                                                                                                                                                                                                                                                                                                                                                                                                                                                                                                                                                                                                                                                                                                                                                                                                                                                                                                                                                                                                                                                                                                                                                                                                                                                                                                                                                                                                                                                                                                     |            |             |            |                                                                                                                                                                                                                                                                                                                                                                                                                                                                                                                                                                                                                                                                                                                                                                                                                                                                                                                                                                                                                                                                                                                                                                                                                                                                                                                                                                                                                                                                                                                                                                                                                                                                                                                                                                                                                                                                                                                                                                                                                                                                                                                                                                                                                                                                                                                                                                                                                                                                                                                                                                                               |   |            |             |             |   |            |             |             |   |            |             |             |   |            |             |             |   |            |             |             |   |            |             |             |   |            |             |            |   |            |             |            |   |            |             |             |   |            |             |             |   |            |             |             |   |             |             |             |   |             |             |             |   |             |             |             |   |             |            |             |   |             |             |             |   |             |             |             |   |             |             |             |   |             |            |             |   |             |             |             |   |             |             |             |   |             |             |             |   |             |             |             |   |             |            |             |   |             |             |             |   |             |             |            |   |             |            |             |   |             |             |             |   |             |            |            |                                                                                                                                                                                                                                                                                                                                                                                                                                                                                                                                                                                                                                                                                                                                                                                                                                                                                                                                                                                                                                                                                                                                                                                                                                                                                                                                                                                                                                                                                                                                                                                                                                                                                                                                                                                                                                                                                                                                                                                                                                                                                                                                                                                                                                                                                                                                                                                                                                                                                                                        |            |            |            |             |            |            |            |                                                                                                                                                                                                                                                                                                                                                                                                                                                                                                                                                                                                                                                                                                                                                                                                                                                                                                                                                                                                                                                                                                                                                                                                                                                                                                                                                                                                                                                                                                                                                                                                                                                                                                                                                                                                                                                                                                                                                                                                                                                                                                                                                                                                                                                                                                                                                                                                                                                                                                                                                                                             |   |            |             |             |   |            |             |             |   |            |             |             |   |            |             |             |   |            |             |             |   |            |             |             |   |            |             |            |   |            |             |            |   |            |            |             |   |            |             |             |   |            |             |             |   |             |             |             |   |             |             |             |   |             |            |             |   |             |             |             |   |             |             |             |   |             |            |             |   |             |             |             |   |             |             |             |   |             |             |             |   |             |             |             |   |             |             |             |   |             |             |             |   |             |            |             |   |             |             |             |   |             |             |            |   |             |             |             |   |             |            |             |   |            |            |            |   |            |            |            |   |            |            |            |
| C                                                                                                                                                                                                                                                                                                                                                                                                                                                                                                                                                                                                                                                                                                                                                                                                                                                                                                                                                                                                                                                                                                                                                                                                                                                                                                                                                                                                                                                                                                                                                                                                                                                                                                                                                                                                                                                                                                                                                                                                                                                                                                                                                                                                                                                                                                                                               | -0.47223500 | 0.27444300                                                                         | -0.48230000                                                                          |             |   |            |            |             |   |            |             |             |   |            |             |             |   |            |             |             |   |            |             |             |   |            |            |             |   |            |             |             |   |            |             |            |   |            |             |             |   |            |            |             |   |            |             |             |   |            |             |             |   |             |             |             |   |             |             |             |   |             |             |            |   |             |             |             |   |             |             |             |   |             |             |             |   |             |             |             |   |             |             |            |   |             |             |             |   |             |            |             |   |             |             |             |   |             |            |             |   |             |            |             |   |             |             |             |                                                                                                                                                                                                                                                                                                                                                                                                                                                                                                                                                                                                                                                                                                                                                                                                                                                                                                                                                                                                                                                                                                                                                                                                                                                                                                                                                                                                                                                                                                                                                                                                                                                                                                                                                                                                                                                                                                                                                                                                                                                                                                                                                                                                                                                                                                                                                                                                                                                                                                                     |            |             |            |                                                                                                                                                                                                                                                                                                                                                                                                                                                                                                                                                                                                                                                                                                                                                                                                                                                                                                                                                                                                                                                                                                                                                                                                                                                                                                                                                                                                                                                                                                                                                                                                                                                                                                                                                                                                                                                                                                                                                                                                                                                                                                                                                                                                                                                                                                                                                                                                                                                                                                                                                                                               |   |            |             |             |   |            |             |             |   |            |             |             |   |            |             |             |   |            |             |             |   |            |             |             |   |            |             |            |   |            |             |            |   |            |             |             |   |            |             |             |   |            |             |             |   |             |             |             |   |             |             |             |   |             |             |             |   |             |            |             |   |             |             |             |   |             |             |             |   |             |             |             |   |             |            |             |   |             |             |             |   |             |             |             |   |             |             |             |   |             |             |             |   |             |            |             |   |             |             |             |   |             |             |            |   |             |            |             |   |             |             |             |   |             |            |            |                                                                                                                                                                                                                                                                                                                                                                                                                                                                                                                                                                                                                                                                                                                                                                                                                                                                                                                                                                                                                                                                                                                                                                                                                                                                                                                                                                                                                                                                                                                                                                                                                                                                                                                                                                                                                                                                                                                                                                                                                                                                                                                                                                                                                                                                                                                                                                                                                                                                                                                        |            |            |            |             |            |            |            |                                                                                                                                                                                                                                                                                                                                                                                                                                                                                                                                                                                                                                                                                                                                                                                                                                                                                                                                                                                                                                                                                                                                                                                                                                                                                                                                                                                                                                                                                                                                                                                                                                                                                                                                                                                                                                                                                                                                                                                                                                                                                                                                                                                                                                                                                                                                                                                                                                                                                                                                                                                             |   |            |             |             |   |            |             |             |   |            |             |             |   |            |             |             |   |            |             |             |   |            |             |             |   |            |             |            |   |            |             |            |   |            |            |             |   |            |             |             |   |            |             |             |   |             |             |             |   |             |             |             |   |             |            |             |   |             |             |             |   |             |             |             |   |             |            |             |   |             |             |             |   |             |             |             |   |             |             |             |   |             |             |             |   |             |             |             |   |             |             |             |   |             |            |             |   |             |             |             |   |             |             |            |   |             |             |             |   |             |            |             |   |            |            |            |   |            |            |            |   |            |            |            |
| C                                                                                                                                                                                                                                                                                                                                                                                                                                                                                                                                                                                                                                                                                                                                                                                                                                                                                                                                                                                                                                                                                                                                                                                                                                                                                                                                                                                                                                                                                                                                                                                                                                                                                                                                                                                                                                                                                                                                                                                                                                                                                                                                                                                                                                                                                                                                               | -0.76509100 | 0.11104600                                                                         | 2.16378400                                                                           |             |   |            |            |             |   |            |             |             |   |            |             |             |   |            |             |             |   |            |             |             |   |            |            |             |   |            |             |             |   |            |             |            |   |            |             |             |   |            |            |             |   |            |             |             |   |            |             |             |   |             |             |             |   |             |             |             |   |             |             |            |   |             |             |             |   |             |             |             |   |             |             |             |   |             |             |             |   |             |             |            |   |             |             |             |   |             |            |             |   |             |             |             |   |             |            |             |   |             |            |             |   |             |             |             |                                                                                                                                                                                                                                                                                                                                                                                                                                                                                                                                                                                                                                                                                                                                                                                                                                                                                                                                                                                                                                                                                                                                                                                                                                                                                                                                                                                                                                                                                                                                                                                                                                                                                                                                                                                                                                                                                                                                                                                                                                                                                                                                                                                                                                                                                                                                                                                                                                                                                                                     |            |             |            |                                                                                                                                                                                                                                                                                                                                                                                                                                                                                                                                                                                                                                                                                                                                                                                                                                                                                                                                                                                                                                                                                                                                                                                                                                                                                                                                                                                                                                                                                                                                                                                                                                                                                                                                                                                                                                                                                                                                                                                                                                                                                                                                                                                                                                                                                                                                                                                                                                                                                                                                                                                               |   |            |             |             |   |            |             |             |   |            |             |             |   |            |             |             |   |            |             |             |   |            |             |             |   |            |             |            |   |            |             |            |   |            |             |             |   |            |             |             |   |            |             |             |   |             |             |             |   |             |             |             |   |             |             |             |   |             |            |             |   |             |             |             |   |             |             |             |   |             |             |             |   |             |            |             |   |             |             |             |   |             |             |             |   |             |             |             |   |             |             |             |   |             |            |             |   |             |             |             |   |             |             |            |   |             |            |             |   |             |             |             |   |             |            |            |                                                                                                                                                                                                                                                                                                                                                                                                                                                                                                                                                                                                                                                                                                                                                                                                                                                                                                                                                                                                                                                                                                                                                                                                                                                                                                                                                                                                                                                                                                                                                                                                                                                                                                                                                                                                                                                                                                                                                                                                                                                                                                                                                                                                                                                                                                                                                                                                                                                                                                                        |            |            |            |             |            |            |            |                                                                                                                                                                                                                                                                                                                                                                                                                                                                                                                                                                                                                                                                                                                                                                                                                                                                                                                                                                                                                                                                                                                                                                                                                                                                                                                                                                                                                                                                                                                                                                                                                                                                                                                                                                                                                                                                                                                                                                                                                                                                                                                                                                                                                                                                                                                                                                                                                                                                                                                                                                                             |   |            |             |             |   |            |             |             |   |            |             |             |   |            |             |             |   |            |             |             |   |            |             |             |   |            |             |            |   |            |             |            |   |            |            |             |   |            |             |             |   |            |             |             |   |             |             |             |   |             |             |             |   |             |            |             |   |             |             |             |   |             |             |             |   |             |            |             |   |             |             |             |   |             |             |             |   |             |             |             |   |             |             |             |   |             |             |             |   |             |             |             |   |             |            |             |   |             |             |             |   |             |             |            |   |             |             |             |   |             |            |             |   |            |            |            |   |            |            |            |   |            |            |            |
| O                                                                                                                                                                                                                                                                                                                                                                                                                                                                                                                                                                                                                                                                                                                                                                                                                                                                                                                                                                                                                                                                                                                                                                                                                                                                                                                                                                                                                                                                                                                                                                                                                                                                                                                                                                                                                                                                                                                                                                                                                                                                                                                                                                                                                                                                                                                                               | -0.31878100 | -0.96392600                                                                        | 2.23160300                                                                           |             |   |            |            |             |   |            |             |             |   |            |             |             |   |            |             |             |   |            |             |             |   |            |            |             |   |            |             |             |   |            |             |            |   |            |             |             |   |            |            |             |   |            |             |             |   |            |             |             |   |             |             |             |   |             |             |             |   |             |             |            |   |             |             |             |   |             |             |             |   |             |             |             |   |             |             |             |   |             |             |            |   |             |             |             |   |             |            |             |   |             |             |             |   |             |            |             |   |             |            |             |   |             |             |             |                                                                                                                                                                                                                                                                                                                                                                                                                                                                                                                                                                                                                                                                                                                                                                                                                                                                                                                                                                                                                                                                                                                                                                                                                                                                                                                                                                                                                                                                                                                                                                                                                                                                                                                                                                                                                                                                                                                                                                                                                                                                                                                                                                                                                                                                                                                                                                                                                                                                                                                     |            |             |            |                                                                                                                                                                                                                                                                                                                                                                                                                                                                                                                                                                                                                                                                                                                                                                                                                                                                                                                                                                                                                                                                                                                                                                                                                                                                                                                                                                                                                                                                                                                                                                                                                                                                                                                                                                                                                                                                                                                                                                                                                                                                                                                                                                                                                                                                                                                                                                                                                                                                                                                                                                                               |   |            |             |             |   |            |             |             |   |            |             |             |   |            |             |             |   |            |             |             |   |            |             |             |   |            |             |            |   |            |             |            |   |            |             |             |   |            |             |             |   |            |             |             |   |             |             |             |   |             |             |             |   |             |             |             |   |             |            |             |   |             |             |             |   |             |             |             |   |             |             |             |   |             |            |             |   |             |             |             |   |             |             |             |   |             |             |             |   |             |             |             |   |             |            |             |   |             |             |             |   |             |             |            |   |             |            |             |   |             |             |             |   |             |            |            |                                                                                                                                                                                                                                                                                                                                                                                                                                                                                                                                                                                                                                                                                                                                                                                                                                                                                                                                                                                                                                                                                                                                                                                                                                                                                                                                                                                                                                                                                                                                                                                                                                                                                                                                                                                                                                                                                                                                                                                                                                                                                                                                                                                                                                                                                                                                                                                                                                                                                                                        |            |            |            |             |            |            |            |                                                                                                                                                                                                                                                                                                                                                                                                                                                                                                                                                                                                                                                                                                                                                                                                                                                                                                                                                                                                                                                                                                                                                                                                                                                                                                                                                                                                                                                                                                                                                                                                                                                                                                                                                                                                                                                                                                                                                                                                                                                                                                                                                                                                                                                                                                                                                                                                                                                                                                                                                                                             |   |            |             |             |   |            |             |             |   |            |             |             |   |            |             |             |   |            |             |             |   |            |             |             |   |            |             |            |   |            |             |            |   |            |            |             |   |            |             |             |   |            |             |             |   |             |             |             |   |             |             |             |   |             |            |             |   |             |             |             |   |             |             |             |   |             |            |             |   |             |             |             |   |             |             |             |   |             |             |             |   |             |             |             |   |             |             |             |   |             |             |             |   |             |            |             |   |             |             |             |   |             |             |            |   |             |             |             |   |             |            |             |   |            |            |            |   |            |            |            |   |            |            |            |
| O                                                                                                                                                                                                                                                                                                                                                                                                                                                                                                                                                                                                                                                                                                                                                                                                                                                                                                                                                                                                                                                                                                                                                                                                                                                                                                                                                                                                                                                                                                                                                                                                                                                                                                                                                                                                                                                                                                                                                                                                                                                                                                                                                                                                                                                                                                                                               | -1.20156800 | 1.16678900                                                                         | 2.39252400                                                                           |             |   |            |            |             |   |            |             |             |   |            |             |             |   |            |             |             |   |            |             |             |   |            |            |             |   |            |             |             |   |            |             |            |   |            |             |             |   |            |            |             |   |            |             |             |   |            |             |             |   |             |             |             |   |             |             |             |   |             |             |            |   |             |             |             |   |             |             |             |   |             |             |             |   |             |             |             |   |             |             |            |   |             |             |             |   |             |            |             |   |             |             |             |   |             |            |             |   |             |            |             |   |             |             |             |                                                                                                                                                                                                                                                                                                                                                                                                                                                                                                                                                                                                                                                                                                                                                                                                                                                                                                                                                                                                                                                                                                                                                                                                                                                                                                                                                                                                                                                                                                                                                                                                                                                                                                                                                                                                                                                                                                                                                                                                                                                                                                                                                                                                                                                                                                                                                                                                                                                                                                                     |            |             |            |                                                                                                                                                                                                                                                                                                                                                                                                                                                                                                                                                                                                                                                                                                                                                                                                                                                                                                                                                                                                                                                                                                                                                                                                                                                                                                                                                                                                                                                                                                                                                                                                                                                                                                                                                                                                                                                                                                                                                                                                                                                                                                                                                                                                                                                                                                                                                                                                                                                                                                                                                                                               |   |            |             |             |   |            |             |             |   |            |             |             |   |            |             |             |   |            |             |             |   |            |             |             |   |            |             |            |   |            |             |            |   |            |             |             |   |            |             |             |   |            |             |             |   |             |             |             |   |             |             |             |   |             |             |             |   |             |            |             |   |             |             |             |   |             |             |             |   |             |             |             |   |             |            |             |   |             |             |             |   |             |             |             |   |             |             |             |   |             |             |             |   |             |            |             |   |             |             |             |   |             |             |            |   |             |            |             |   |             |             |             |   |             |            |            |                                                                                                                                                                                                                                                                                                                                                                                                                                                                                                                                                                                                                                                                                                                                                                                                                                                                                                                                                                                                                                                                                                                                                                                                                                                                                                                                                                                                                                                                                                                                                                                                                                                                                                                                                                                                                                                                                                                                                                                                                                                                                                                                                                                                                                                                                                                                                                                                                                                                                                                        |            |            |            |             |            |            |            |                                                                                                                                                                                                                                                                                                                                                                                                                                                                                                                                                                                                                                                                                                                                                                                                                                                                                                                                                                                                                                                                                                                                                                                                                                                                                                                                                                                                                                                                                                                                                                                                                                                                                                                                                                                                                                                                                                                                                                                                                                                                                                                                                                                                                                                                                                                                                                                                                                                                                                                                                                                             |   |            |             |             |   |            |             |             |   |            |             |             |   |            |             |             |   |            |             |             |   |            |             |             |   |            |             |            |   |            |             |            |   |            |            |             |   |            |             |             |   |            |             |             |   |             |             |             |   |             |             |             |   |             |            |             |   |             |             |             |   |             |             |             |   |             |            |             |   |             |             |             |   |             |             |             |   |             |             |             |   |             |             |             |   |             |             |             |   |             |             |             |   |             |            |             |   |             |             |             |   |             |             |            |   |             |             |             |   |             |            |             |   |            |            |            |   |            |            |            |   |            |            |            |

## O. INTRINSIC REACTION COORDINATE (IRC) ANALYSIS

$R_1^-$

TS imaginary frequency =  $410.22 \text{ cm}^{-1}$

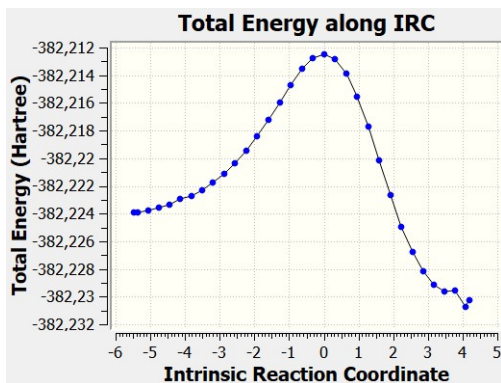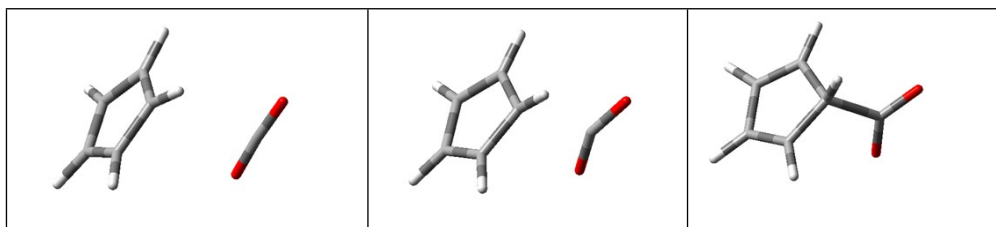

$R_2^-$

TS imaginary frequency =  $438.50 \text{ cm}^{-1}$

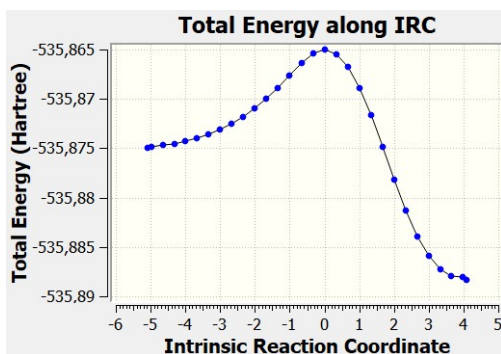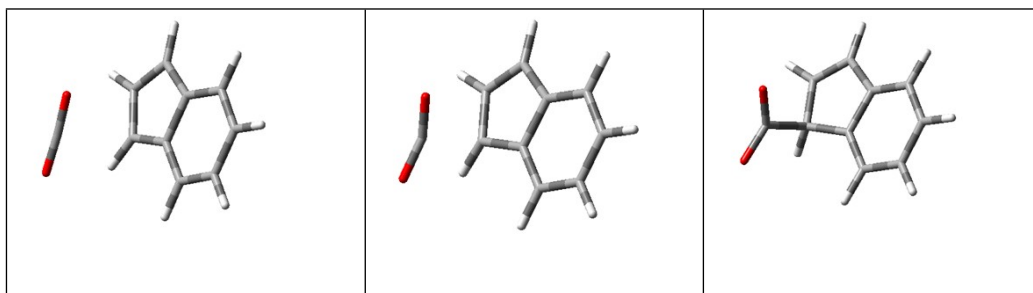



$R_3^-$

TS imaginary frequency =  $384.07 \text{ cm}^{-1}$

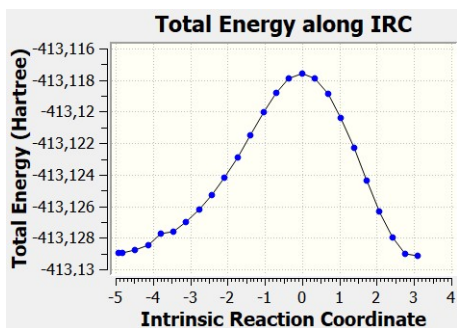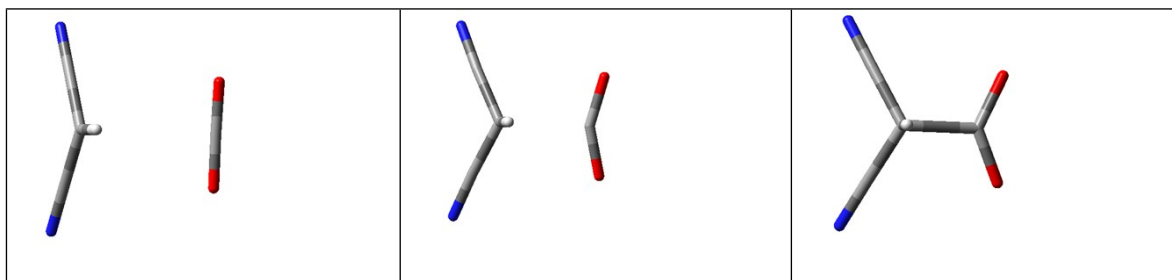

$R_4^-$

TS imaginary frequency =  $247.35 \text{ cm}^{-1}$

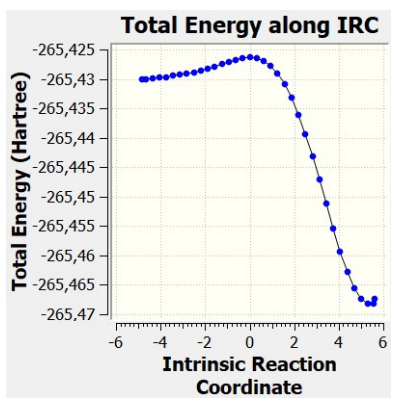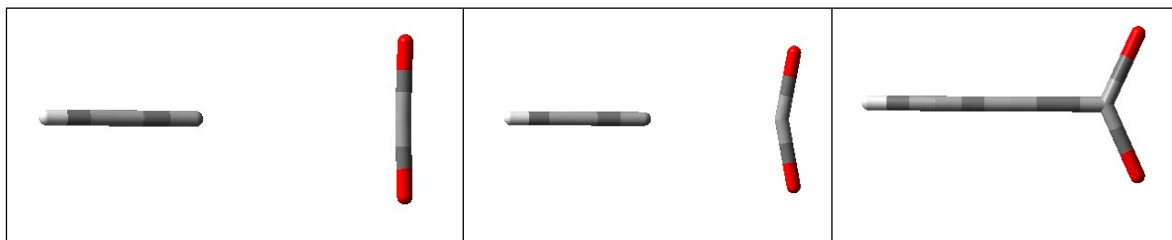

R<sub>5</sub><sup>-</sup>

TS imaginary frequency = 197.77 cm<sup>-1</sup>

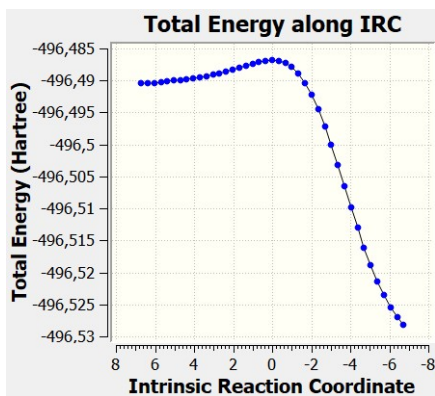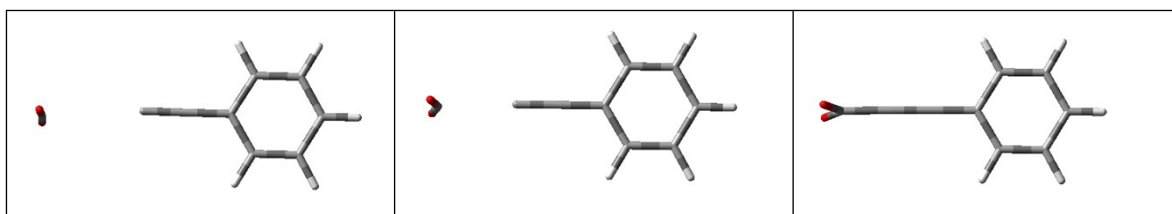

R<sub>6</sub><sup>-</sup>

TS imaginary frequency = 362.00 cm<sup>-1</sup>

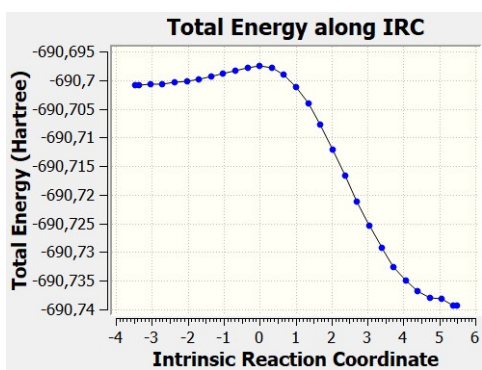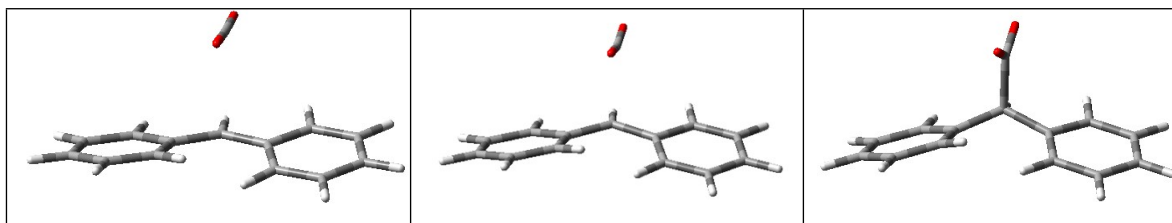

R<sub>7</sub><sup>-</sup>

TS imaginary frequency = 426.14 cm<sup>-1</sup>

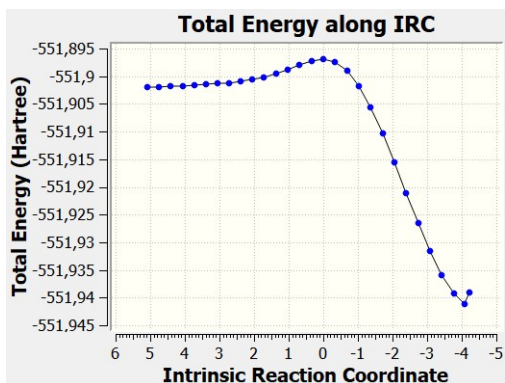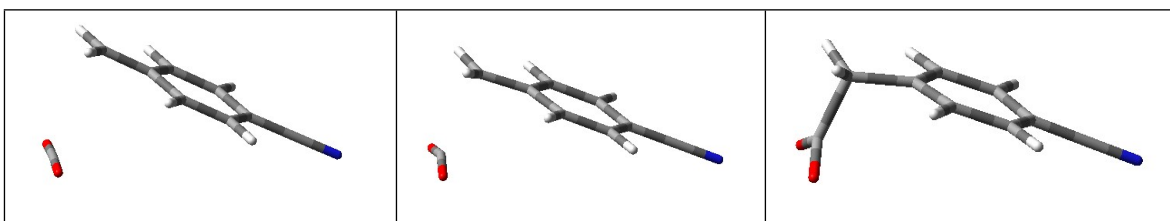

R<sub>8</sub><sup>-</sup>

TS imaginary frequency = 477.30 cm<sup>-1</sup>

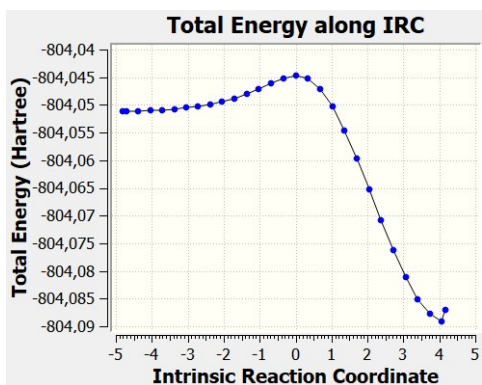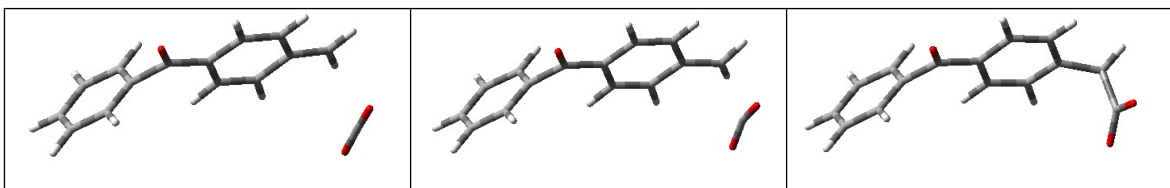

$R_9^-$

TS imaginary frequency =  $552.72 \text{ cm}^{-1}$

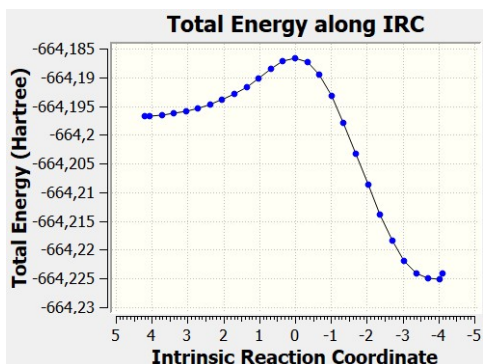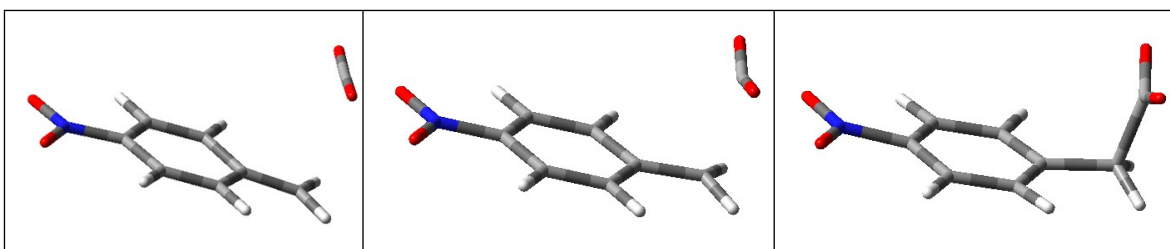

$R_{10}^-$

TS imaginary frequency =  $351.56 \text{ cm}^{-1}$

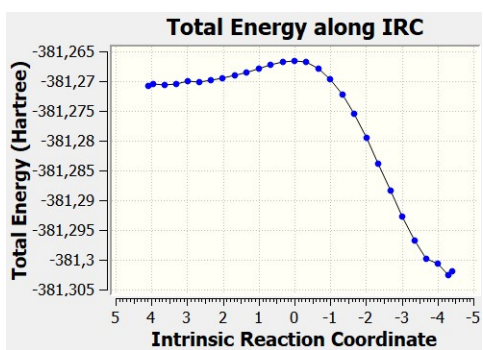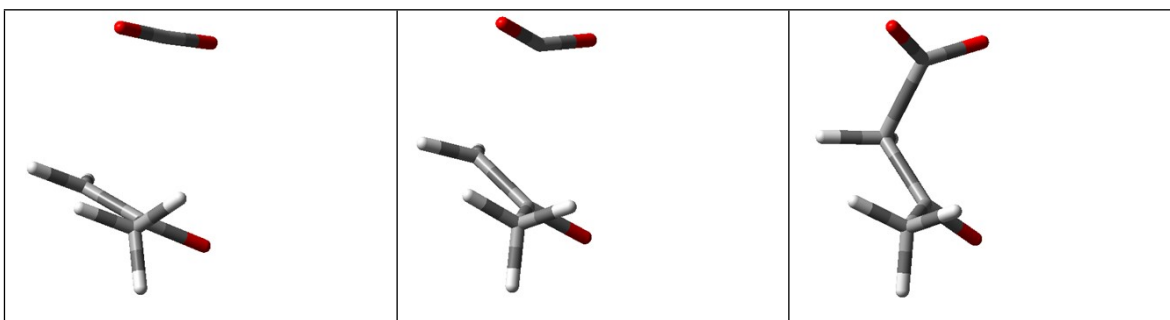

$R_{11}^-$

TS imaginary frequency =  $277.11 \text{ cm}^{-1}$

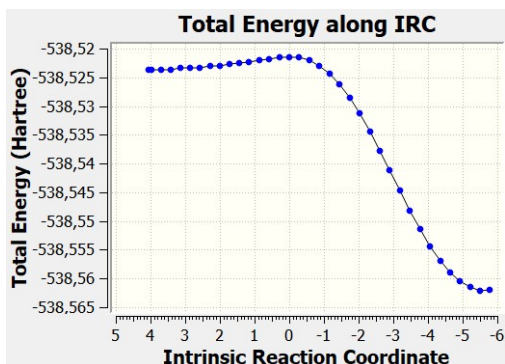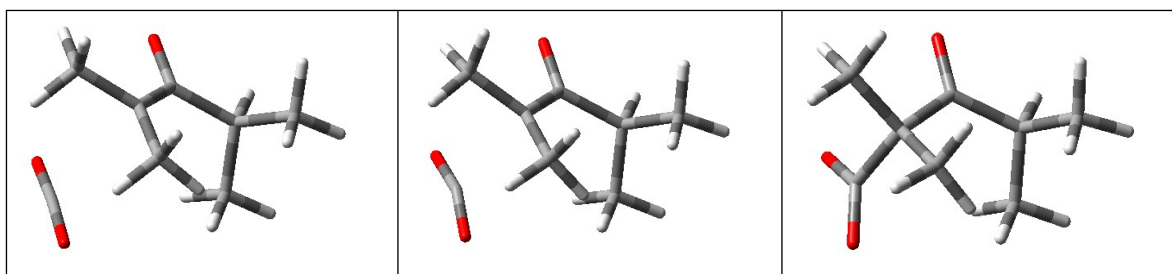

$R_{12}^-$

TS imaginary frequency =  $301.67 \text{ cm}^{-1}$

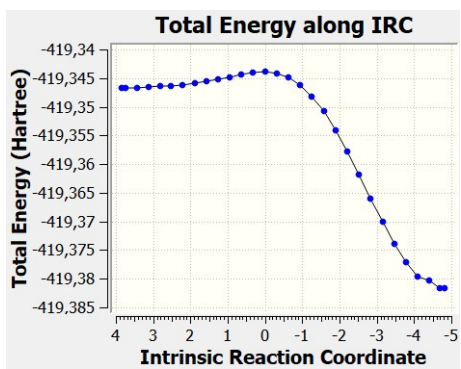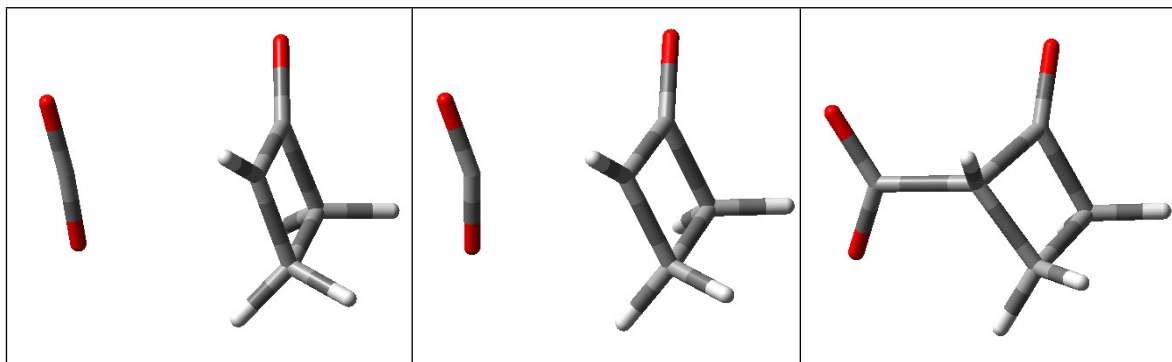

$R_{13}^-$

TS imaginary frequency = 292.94  $\text{cm}^{-1}$

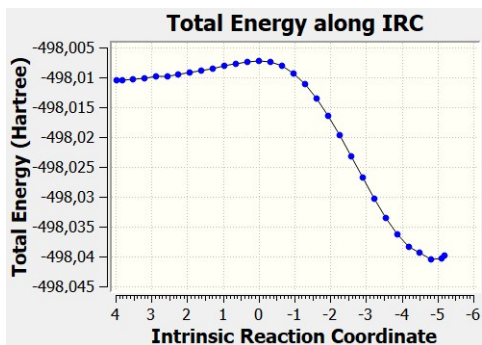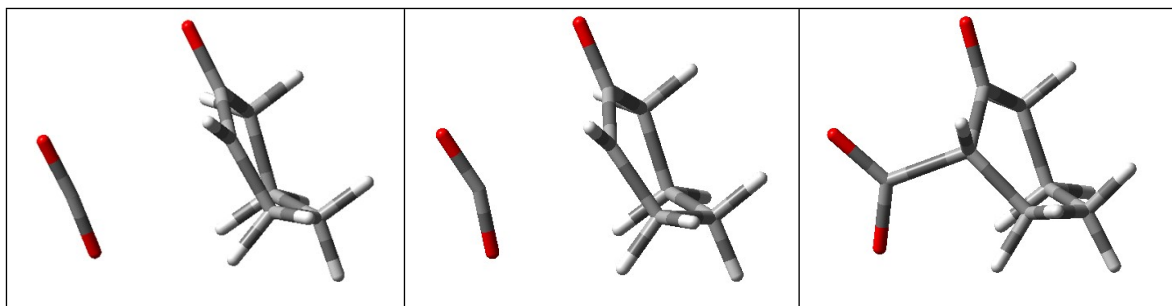

$R_{14}^-$

TS imaginary frequency = 376.05  $\text{cm}^{-1}$

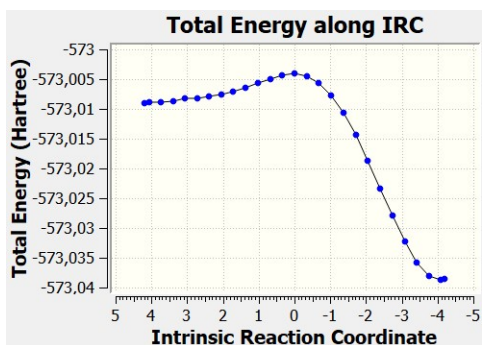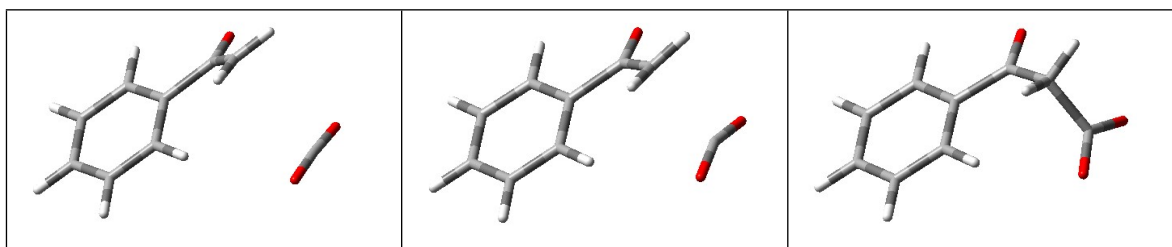

R<sub>15</sub><sup>-</sup>

TS imaginary frequency = 391.92 cm<sup>-1</sup>

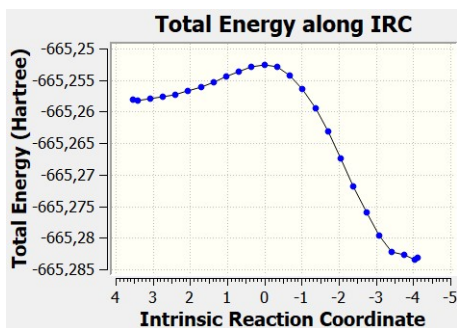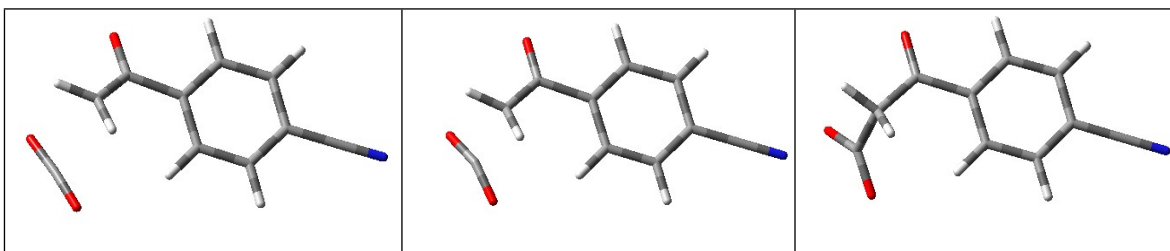

R<sub>16</sub><sup>-</sup>

TS imaginary frequency = 357.14 cm<sup>-1</sup>

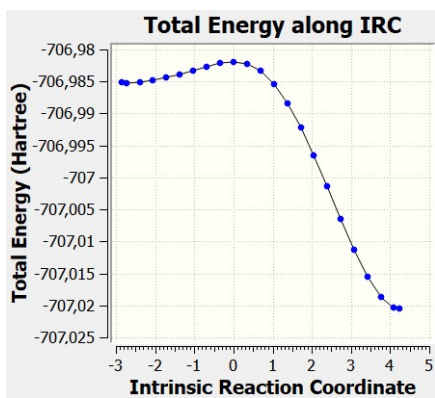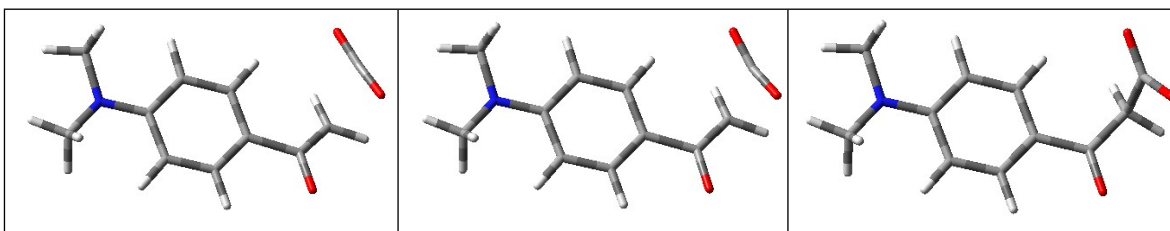



**R<sub>17</sub><sup>-</sup>**

TS imaginary frequency = 424.47 cm<sup>-1</sup>

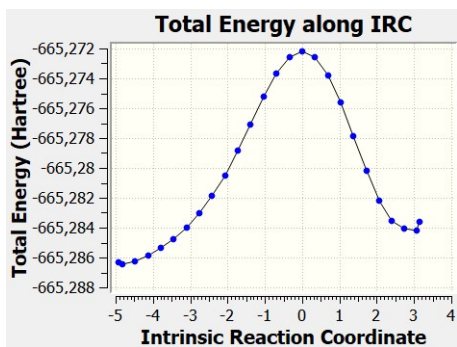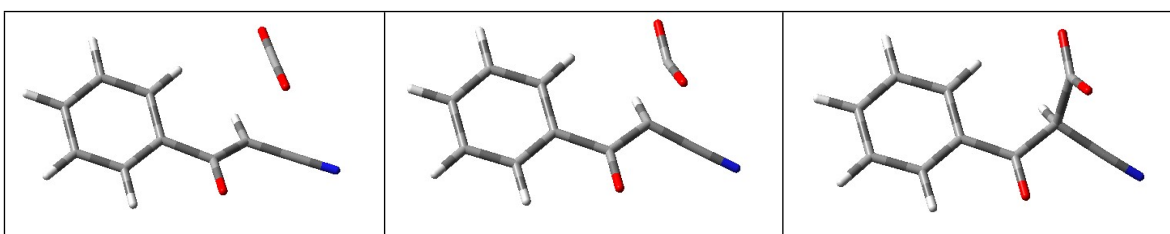

**R<sub>18</sub><sup>-</sup>**

imaginary frequency = 421.27 cm<sup>-1</sup>

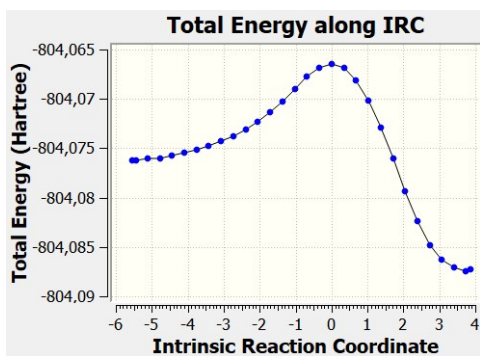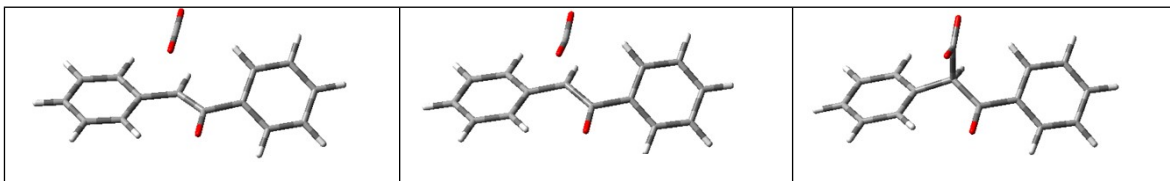



R<sub>19</sub><sup>-</sup>

TS imaginary frequency = 342.63 cm<sup>-1</sup>

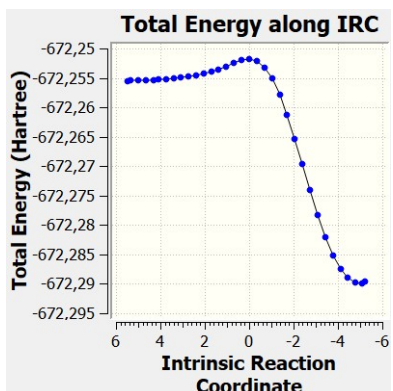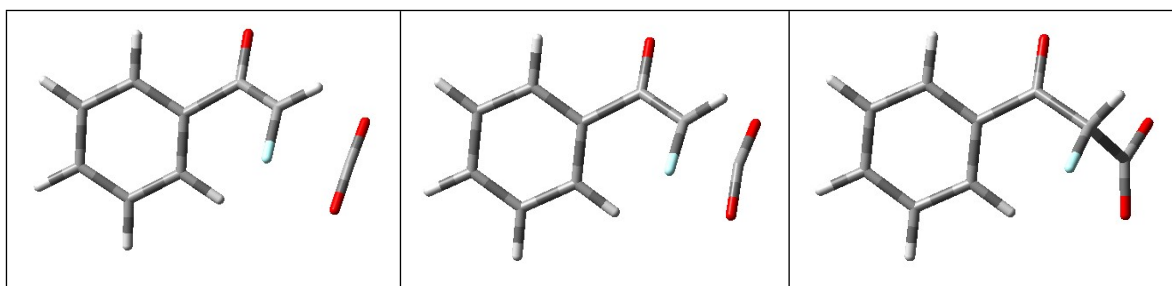

R<sub>20</sub><sup>-</sup>

TS imaginary frequency = 348.58 cm<sup>-1</sup>

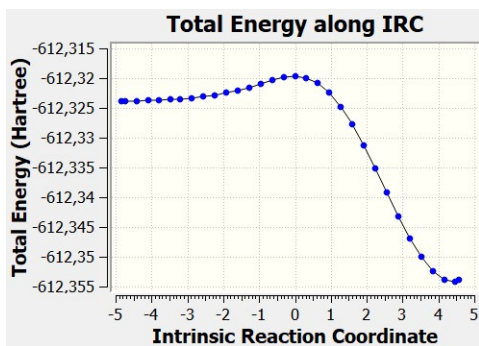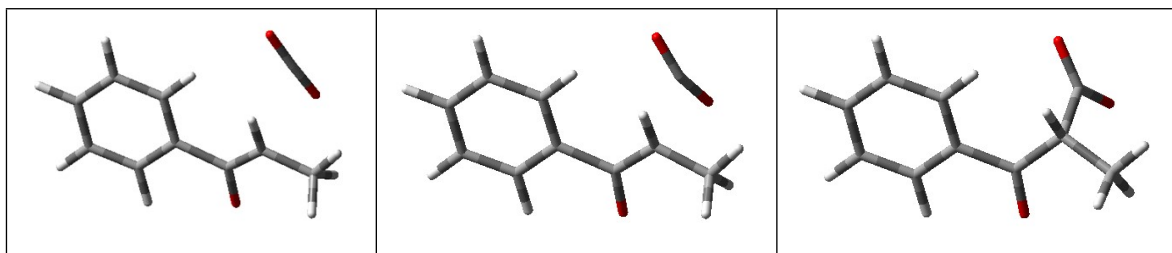

$R_{21}^-$

TS imaginary frequency =  $296.69 \text{ cm}^{-1}$

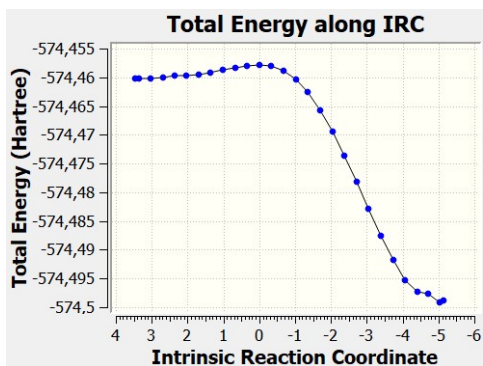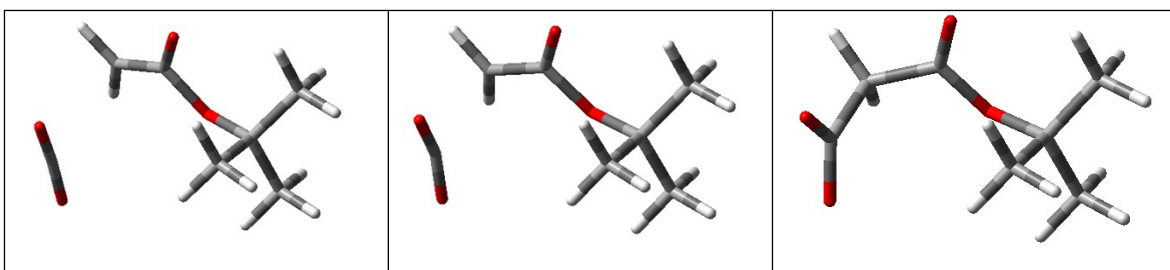

$R_{22}^-$

TS imaginary frequency =  $369.81 \text{ cm}^{-1}$

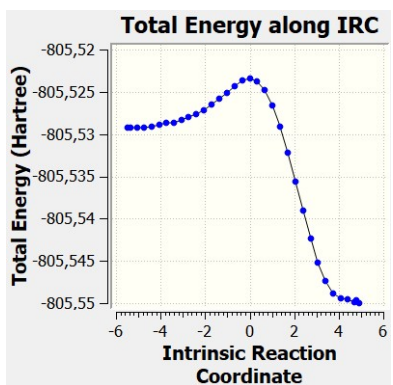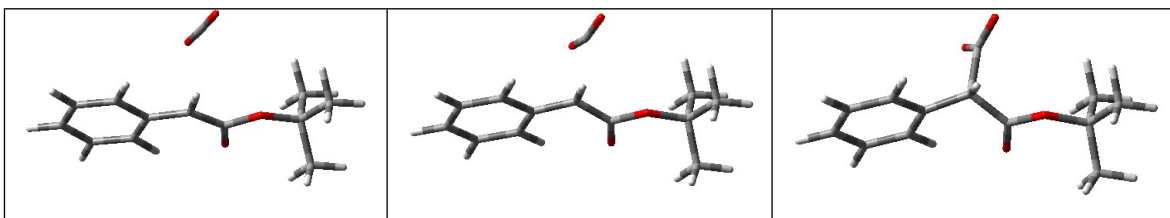

$R_{23}^- C_1$  (reported in the main text)

TS imaginary frequency =  $412.06 \text{ cm}^{-1}$

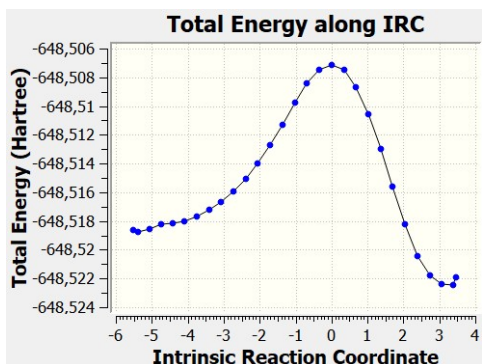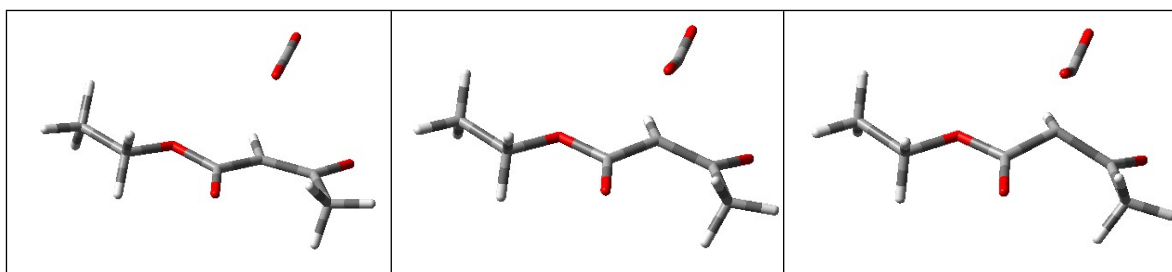

$R_{23}^- C_3$

TS imaginary frequency =  $-409.92 \text{ cm}^{-1}$

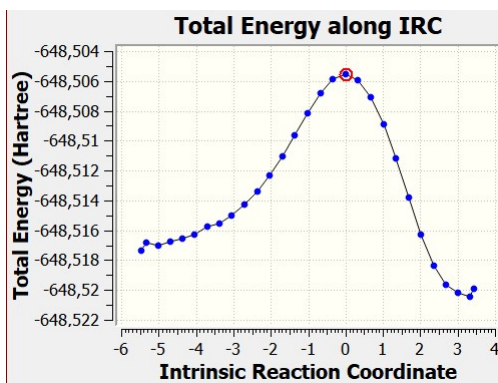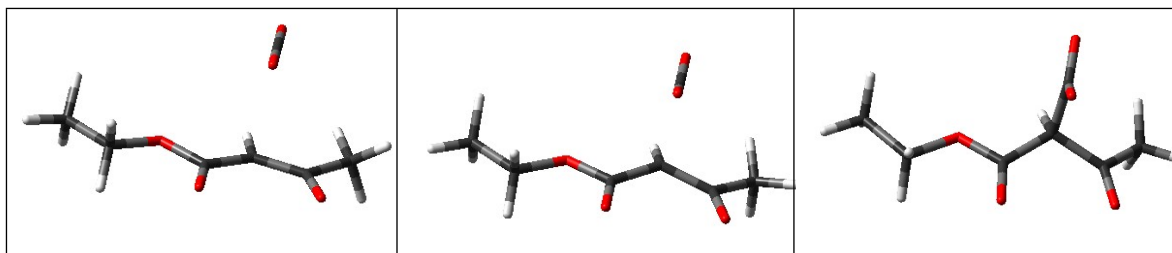

$R_{24}^- c_1$  (reported in the main text)

TS imaginary frequency =  $418.06 \text{ cm}^{-1}$

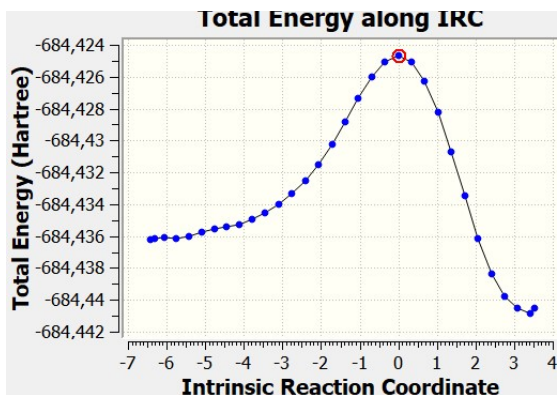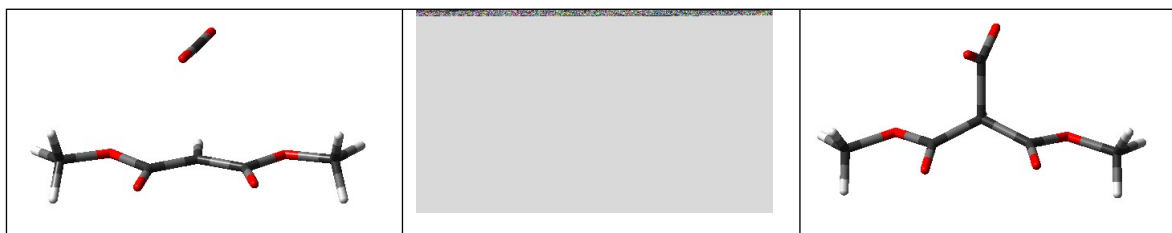

$R_{24}^- c_2$

TS imaginary frequency =  $416.64 \text{ cm}^{-1}$

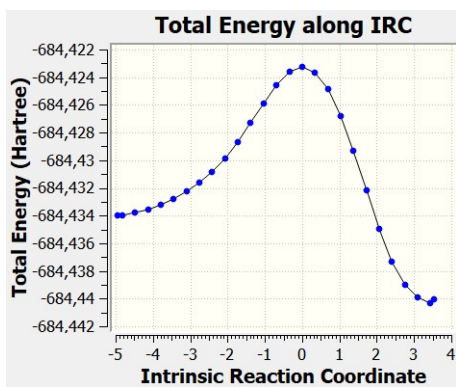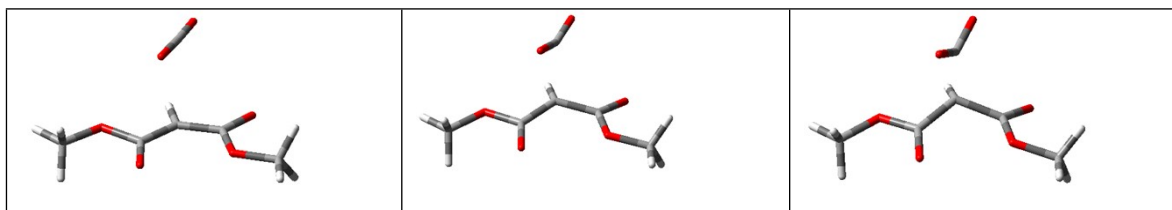

$R_{25}^- c_1$  (reported in the main text)

TS imaginary frequency =  $403.79 \text{ cm}^{-1}$

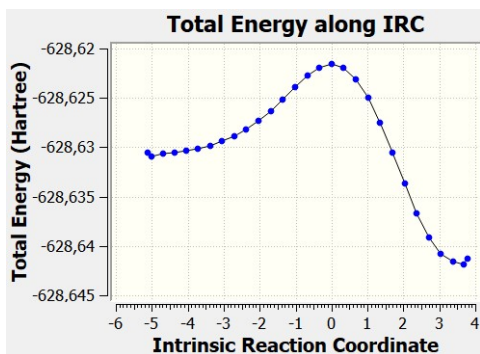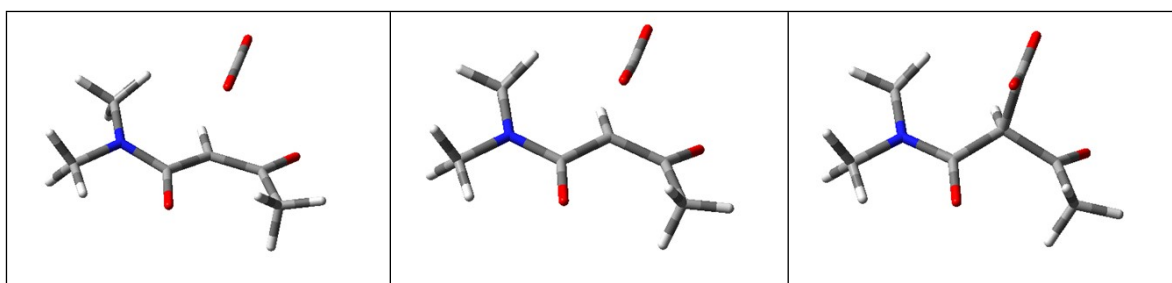

$R_{25}^- c_2$

TS imaginary frequency =  $408.70 \text{ cm}^{-1}$

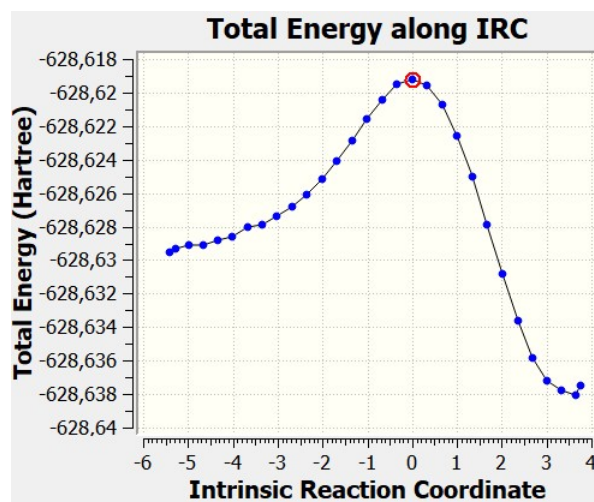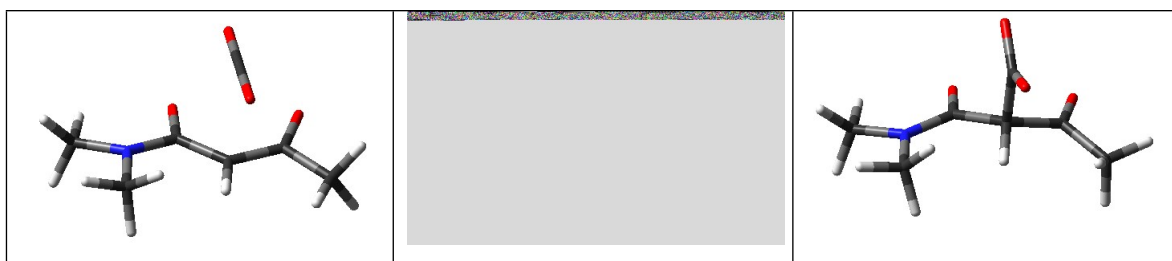

R<sub>26</sub><sup>-</sup>

TS imaginary frequency = 385.63 cm<sup>-1</sup>

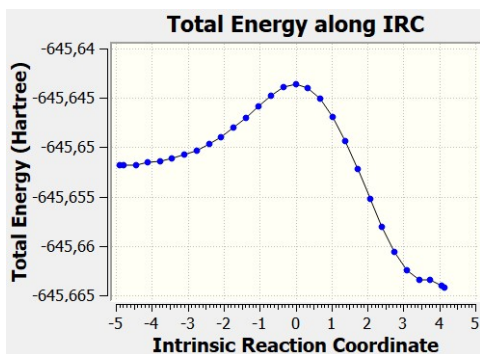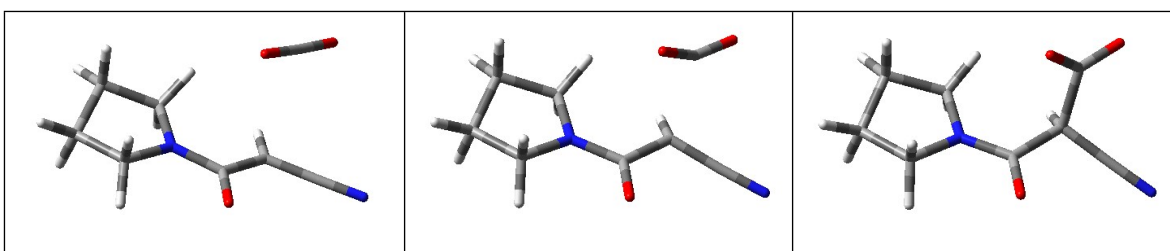

R<sub>27</sub><sup>-</sup>

TS imaginary frequency = 243.80 cm<sup>-1</sup>

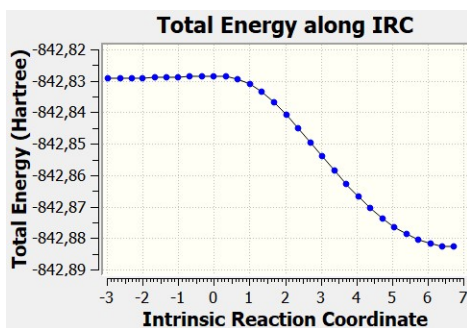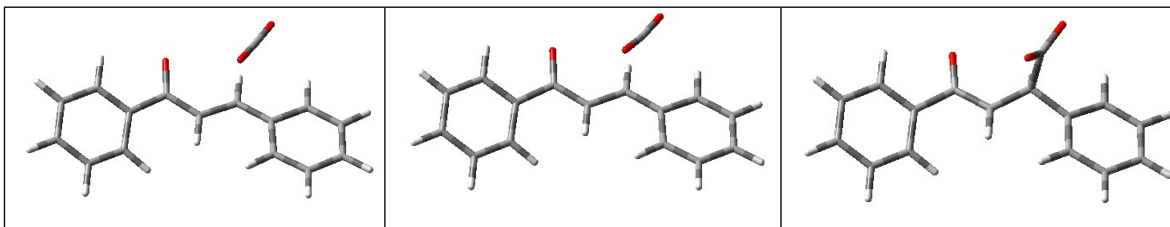

R<sub>28</sub><sup>-</sup>

TS imaginary frequency = 259.54 cm<sup>-1</sup>

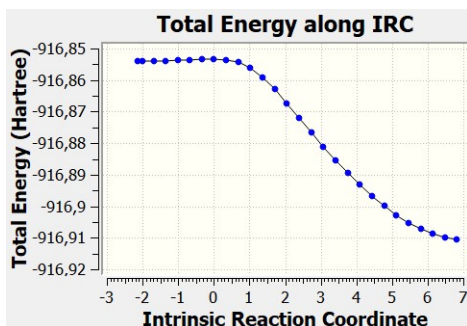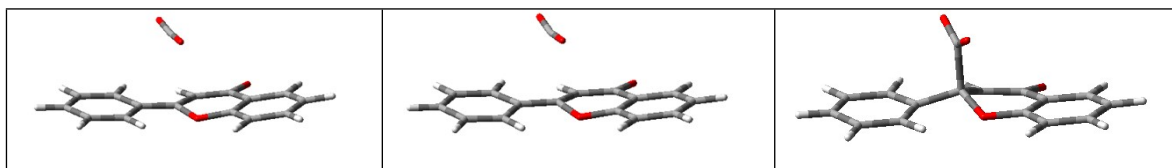

## P. REFERENCES

- 1 Z. Li, R. J. Mayer, A. R. Ofial and H. Mayr, *J. Am. Chem. Soc.*, 2020, **142**, 8383–8402.
- 2 J. N. Harvey, F. Himo, F. Maseras and L. Perrin, *ACS Catal.*, 2019, **9**, 6803–6813.
- 3 R. F. Ribeiro, A. V. Marenich, C. J. Cramer and D. G. Truhlar, *J. Phys. Chem. B*, 2011, **115**, 14556–14562.
- 4 G. Luchini, J. V Alegre-Requena, I. Funes-Ardoiz and R. S. Paton, *F1000Research*, 2020, **9**, 291.
